# Supplementary material for: Stemness Activity Underlying Whole Brain Regeneration in a Basal Chordate
Source: Cells. 2022 Nov 22;11(23):3727. doi: 10.3390/cells11233727 (PMC9738451; doi:10.3390/cells11233727)
Supplement: Supplementary file 1 [file cells-11-03727-s001.zip]

Archive with 8 entries (8 files):
- Cells_Supplementary_figures_Gordon_revised.pdf
- Fig S1.jpg
- Fig S2.jpg
- Fig S3.jpg
- Fig S4.jpg
- Supplementary Table 1_SD genes and counts .xlsx
- Supplementary Table 2_binary.xlsx
- Supplementary Table 3_Pathway enrichment expression .xlsx
