# Supplementary material for: Stemness Activity Underlying Whole Brain Regeneration in a Basal Chordate
Source: Cells. 2022 Nov 22;11(23):3727. doi: 10.3390/cells11233727 (PMC9738451; doi:10.3390/cells11233727)
Supplement: Supplementary file 1 [file cells-11-03727-s001.zip › Supplementary Table 1_SD genes and counts .xlsx]

## Sheet: DEseq_LRT
gene_id	log2FC_2v0	log2FC_7v0	log2FC_14v0	log2FC_21v0	padj	SYMBOL	Gene name
TRINITY_DN0_c0_g1	-0.975771	-0.769321	-0.109553	-0.210071	0.737658	Q9R1X4	Timeless Tim1 Timeless1
TRINITY_DN1_c0_g1	-0.755564	-0.376954	-0.172052	-0.523544	0.000124894	Q8CGY8	Ogt
TRINITY_DN10_c0_g1	-1.13796	-0.293412	-0.867678	-1.13728	0.233603	P31649	Slc6a13 Gabt2 Gabt3 Gat-3 Gat2 Gat3
TRINITY_DN10_c0_g2	-2.39024	-0.362594	0.373909	-0.354574	0.152261	P31649	Slc6a13 Gabt2 Gabt3 Gat-3 Gat2 Gat3
TRINITY_DN10_c3_g1	-1.46587	-0.973326	-0.335656	-0.682453	0.750207	P31649	Slc6a13 Gabt2 Gabt3 Gat-3 Gat2 Gat3
TRINITY_DN100_c0_g1	-3.90668	-1.20149	-1.14874	-1.13259	0.0077443	Q3T9X0	Slc2a9 Glut9
TRINITY_DN100_c0_g2	-0.728112	1.46969	0.61777	1.05188	0.256558	Q9WV38	Slc2a5 Glut5
TRINITY_DN100_c2_g2	1.55592	0.651494	0.434008	1.13621	0.0629195	Q91VU0	Fam3c D6Wsu176e Ilei
TRINITY_DN1000_c0_g1	-0.0573124	0.0511873	-0.768469	-0.20355	0.79431	Q3UM29	Cog7
TRINITY_DN10001_c0_g1	-23.4939	-23.1425	-7.28111	0.98581	0.22281	Q8BZM0	Klhl12 C3ip1
TRINITY_DN10006_c0_g1	-0.200439	-0.434217	-0.190512	-0.455879	0.698424	Q5IRJ6	Slc30a9
TRINITY_DN100063_c0_g1	5.59583	0.301769	1.9915	5.1817	#N/A	Q99J77	Nans Sas
TRINITY_DN100078_c0_g1	-3.39437	-0.0363479	0.385383	0.24764	#N/A	E9Q555	Rnf213 Mystr
TRINITY_DN10008_c0_g2	-0.0102287	0.0923383	-0.0919475	0.160915	0.921214	Q8CJ61	Cmtm4 Cklfsf4
TRINITY_DN10009_c0_g1	2.11097	2.68222	2.26242	-0.184537	0.0286104	Q61982	Notch3
TRINITY_DN1001_c0_g2	-0.050347	-0.147974	0.0843843	-0.0564689	0.981318	P30280	Ccnd2 Cyl-2
TRINITY_DN10012_c0_g1	-4.84233	-1.31689	-0.387007	-1.24114	0.326246	Q63870	Col7a1
TRINITY_DN10013_c0_g1	0.339985	0.119279	0.0135089	0.572748	0.697945	P97346	Nxn Gn25
TRINITY_DN10014_c0_g1	-0.450663	-0.476577	-0.743934	-0.638643	0.364938	Q8CGV9	Tshz3 Kiaa1474 Tsh3 Zfp537 Znf537
TRINITY_DN10016_c0_g1	-2.22375	-1.14644	-0.954521	0.0390561	0.0178824	P49429	Hpd
TRINITY_DN10017_c0_g1	3.12667	1.26504	0.454709	1.20302	5.90082e-07	Q8R2F2	Degs2
TRINITY_DN10020_c0_g1	-0.601286	-0.187247	0.107389	-0.459989	0.772707	Q69ZK0	Prex1 Kiaa1415
TRINITY_DN10022_c0_g1	0.143582	1.55686	1.52027	0.707515	0.518068	Q6P5C7	Znf728 Zfp458
TRINITY_DN10022_c0_g2	1.66001	0.0813766	-0.0687525	0.43559	0.375855	Q8C827	Zfp62
TRINITY_DN100238_c0_g1	2.38451	-5.55936	1.49321	-5.56397	0.501344	Q9Z2E3	Ern2 Ire2
TRINITY_DN100260_c0_g1	-2.39403	-3.17903	0.587429	-1.04617	#N/A	Q8BGK6	Slc7a6 Kiaa0245
TRINITY_DN10028_c0_g1	1.05073	0.633912	0.337817	0.256845	0.00248451	Q9JM13	Rabgef1 Rabex5
TRINITY_DN10029_c0_g1	0.678099	0.877244	1.38954	0.305371	0.567066	P09528	Fth1 Fth
TRINITY_DN10029_c1_g1	-0.858411	-0.379737	-0.669115	-0.655211	0.876976	Q8C9E8	Calhm6 Fam26f
TRINITY_DN1003_c0_g1	0.653171	0.0814843	0.0502279	-0.264705	0.445926	Q9CR47	Nsa2 Tinp1
TRINITY_DN10034_c0_g1	-0.908263	-0.264874	-0.662769	-0.149801	0.934551	Q921I6	Sh3bp4
TRINITY_DN10037_c0_g1	-0.290388	0.35333	0.211102	0.0618221	0.536492	Q80YQ2	Med23 Crsp3 Kiaa1216 Sur2
TRINITY_DN10038_c0_g1	-0.914352	-0.886659	0.0375634	0.440373	0.344426	P14602	Hspb1 Hsp25 Hsp27
TRINITY_DN1004_c0_g1	-1.20641	-1.43883	-1.36831	-1.39509	0.00041092	Q3UYH7	Adrbk2
TRINITY_DN10043_c0_g1	-0.597432	-0.382984	-0.287833	0.0554349	0.268589	Q9D3S3	Snx29
TRINITY_DN10044_c0_g1	-2.57924	-1.33952	-0.323313	-0.859964	0.0301122	O88310	Itln1 Intl Itln Itln1a Itlna
TRINITY_DN10046_c0_g1	0.825431	0.866962	0.686363	0.694473	0.633641	Q9CWH5	Trmt11
TRINITY_DN1005_c0_g1	0.192146	-0.575853	0.0159218	-0.0646927	0.97217	Q8BSU7	Mob3a Mobkl2a
TRINITY_DN10050_c0_g2	-1.20977	0.00173368	0.50159	-0.114534	0.133115	P28867	Prkcd Pkcd
TRINITY_DN10053_c0_g1	1.36286	1.11377	0.835988	0.756867	1.49658e-05	P70340	Smad1 Madh1 Madr1
TRINITY_DN10060_c0_g1	0.275253	-0.255385	-0.109083	0.0410776	0.9043	Q80Z25	Ofd1
TRINITY_DN10061_c0_g1	-1.21708	-0.00767903	-0.207519	-0.498935	0.0075309	Q6ZQ11	Chsy1 Kiaa0990
TRINITY_DN10062_c0_g1	-0.476581	-0.281499	0.285341	-0.270833	0.785794	Q8C784	Mosmo Atthog
TRINITY_DN10066_c0_g1	-2.05956	-0.710772	-0.00797938	0.805977	0.21636	D3YXG0	Hmcn1
TRINITY_DN10068_c0_g1	0.705565	0.388713	0.57957	0.00734766	0.70623	Q64459	Cyp3a11 Cyp3a-11
TRINITY_DN1007_c0_g1	0.125573	0.0866703	-0.445	-0.76864	0.260134	P61164	Actr1a Ctrn1
TRINITY_DN100728_c0_g1	-2.70524	-2.20406	-1.68131	-1.63287	0.669962	Q8K259	Gin1 Zh2c2
TRINITY_DN10073_c0_g1	-0.771703	-2.01554	-1.76638	-2.42528	0.0732055	P97348	Rhod Arhd Rhom
TRINITY_DN10074_c0_g1	-0.200867	-0.286993	1.0735	0.315637	0.329053	P70669	Phex Hyp Pex
TRINITY_DN100745_c0_g1	-0.681974	3.87409	0.826454	0.160117	0.0408033	Q5U405	Tmprss13 Msp
TRINITY_DN100754_c0_g1	-7.0555	-6.86033	0.853456	-6.86495	#N/A	E0CZ16	Klhl3
TRINITY_DN10076_c0_g1	-1.23959	-7.07285	-1.3678	-7.07747	#N/A	A2AVA0	Svep1
TRINITY_DN10076_c0_g2	-0.787876	-0.715511	0.0610013	0.117886	0.949967	Q07968	F13b Cf13b
TRINITY_DN100784_c0_g1	-2.18702	-0.524571	-2.67934	-4.47376	#N/A	Q9WU63	Hebp2 Soul
TRINITY_DN10081_c0_g1	0.526025	0.199531	0.473422	0.091566	0.347278	A2A5K6	Znf335 Zfp335
TRINITY_DN10083_c0_g1	-2.62335	-1.3427	-0.0996961	1.02905	0.88123	P58801	Ripk2
TRINITY_DN10083_c0_g2	0.7318	2.46767	0.538075	2.45457	0.697945	P58801	Ripk2
TRINITY_DN10084_c0_g1	-1.96092	1.00568	-0.570324	-0.857007	0.336154	Q62443	Nptx1
TRINITY_DN10086_c0_g1	-0.0407728	2.93537	1.67733	0.121195	2.23219e-05	P47713	Pla2g4a Cpla2 Pla2g4
TRINITY_DN10088_c0_g1	0.507321	-0.523857	0.0274198	-0.0020762	0.399738	Q9ESJ1	Cables1 Cables
TRINITY_DN10092_c0_g1	0.693536	2.2875	1.38941	1.40621	0.361873	Q91V83	Tti1
TRINITY_DN10095_c0_g1	-1.81914	1.01918	0.443507	0.426852	0.19576	Q9JHQ5	Lztfl1
TRINITY_DN10096_c0_g1	1.71129	4.2902	0.540943	2.26749	0.629012	Q62210	Birc2
TRINITY_DN100982_c0_g1	0.033334	0.447403	-1.50114	-1.45419	0.857092	Q8CFI7	Polr2b
TRINITY_DN1010_c0_g1	-0.273411	1.29729	0.941544	0.800696	0.361819	Q8BGC3	Slc16a12 Mct12
TRINITY_DN10101_c0_g1	-1.46397	-1.88226	-1.81217	-1.23623	0.00540277	O08528	Hk2
TRINITY_DN10107_c0_g1	2.36202	1.17283	1.97807	2.18596	0.034083	A8VU90	Ankle1 Ankrd41 Lem3
TRINITY_DN10109_c0_g1	-1.36318	0.0283132	-0.687429	0.210099	0.219151	Q8C3F7	Klhl30
TRINITY_DN1011_c0_g1	-0.305287	-0.553245	-0.541996	-1.03176	0.931102	O35082	Kl
TRINITY_DN10110_c0_g1	-1.40055	-0.781556	-0.991647	-0.673426	0.000720574	Q9DC53	Cpne8
TRINITY_DN10114_c0_g1	-0.496065	0.164853	1.7408	1.06847	0.407891	Q8VDT1	Slc5a9 Sglt4
TRINITY_DN10118_c0_g1	2.20816	1.0231	1.88118	2.84104	0.0408033	Q80UK7	Sass6 Sas6
TRINITY_DN10119_c0_g1	-5.3308	-2.13728	-0.493489	0.132753	0.00208667	Q9JHF7	Hpgds Gsts Pgds Ptgds2
TRINITY_DN1012_c0_g1	-0.914592	-0.510788	-0.963081	-0.718211	0.605472	Q9ERI5	Jmjd6 Kiaa0585 Ptdsr
TRINITY_DN10125_c0_g1	-6.73666	-10.8712	-7.6255	-9.15536	0.0090574	Q710D3	Unc93a
TRINITY_DN10127_c0_g1	1.97814	1.94127	1.76863	1.39988	0.00145044	Q5NC05	Ttf2
TRINITY_DN10127_c1_g1	0.162848	-0.113414	-0.172021	-0.580574	0.978117	Q9D6W8	Borcs6
TRINITY_DN1013_c0_g1	-0.000105137	-0.368217	-0.480979	-0.429574	0.429563	Q8BMJ3	Eif1ax Eif1ay
TRINITY_DN10131_c0_g1	-0.144067	1.09288	2.98394	2.53338	0.429851	D3YXG0	Hmcn1
TRINITY_DN10134_c0_g1	-0.0344184	-0.354559	0.338778	-0.550951	0.590714	Q8CC21	Ttc19
TRINITY_DN10136_c0_g1	1.20486	0.748243	0.439808	0.560647	0.162445	Q9Z2U1	Psma5
TRINITY_DN10137_c0_g1	3.0751	1.85523	1.12559	0.438702	0.000493489	Q80W94	Mogat2 Dgat2l5 Mgat1l
TRINITY_DN1014_c0_g1	-0.00349017	0.011976	0.104568	-0.145801	0.99459	Q8BVQ5	Ppme1 Pme1
TRINITY_DN10141_c0_g1	0.755216	0.361485	0.100033	0.405922	0.31857	Q923X4	Glrx2 Grx2
TRINITY_DN10144_c0_g1	-1.0576	-0.789138	-0.682201	-1.08771	0.0341388	Q8BUR3	Foxj3 Kiaa1041
TRINITY_DN10146_c0_g1	-0.571371	-0.506443	-0.632781	-0.454114	0.281747	Q9EPW2	Klf15 Cklf
TRINITY_DN10149_c0_g1	-0.424457	-0.75251	-0.693424	-0.792228	0.124727	P26638	Sars1 Sars Sers
TRINITY_DN10151_c0_g1	2.89211	1.44291	1.48428	1.77912	2.45024e-06	Q02395	Mtf2 Pcl2
TRINITY_DN10154_c0_g1	-0.0275952	0.560708	0.529166	0.860078	0.143743	Q8R086	Suox
TRINITY_DN10156_c0_g1	2.17209	1.62318	1.07949	1.0114	0.0139443	Q91VE0	Slc27a4 Acsvl4 Fatp4
TRINITY_DN10158_c0_g1	4.98581	2.67547	1.58094	2.17202	1.77117e-23	P26443	Glud1 Glud
TRINITY_DN10167_c0_g1	-7.75922	-0.324253	-0.589738	0.745929	0.573368	O08863	Birc3
TRINITY_DN10168_c0_g1	-2.48167	0.0312376	0.119125	-0.0955641	0.0366329	Q9ER75	Irx6 Irxb3
TRINITY_DN101681_c0_g1	-6.67399	-0.139505	-3.04054	-2.04953	0.365477	Q8BN82	Slc17a5
TRINITY_DN10169_c0_g1	5.97543	3.79198	1.51893	0.484414	2.98774e-16	O35607	Bmpr2
TRINITY_DN1017_c0_g1	-0.327691	-0.219524	0.268401	1.58731	0.284582	P23927	Cryab Crya2
TRINITY_DN10170_c0_g1	0.432366	0.0911935	-0.108323	1.01397	0.235336	Q9D9F8	Mipol1
TRINITY_DN10173_c0_g2	-0.488256	-0.0731514	-0.490231	-0.375332	0.641798	Q9EQS9	Igdcc4 Ddm36 Kiaa1628 Nope
TRINITY_DN10178_c0_g1	-0.489609	-0.618895	0.574258	0.0851009	0.291777	Q9JI48	Plac8
TRINITY_DN10179_c0_g1	1.13095	0.303214	0.177002	0.406574	0.0193619	Q8VC56	Rnf8
TRINITY_DN1018_c0_g1	-0.345776	-0.408406	-0.183217	-0.679227	0.679119	P62996	Tra2b Sfrs10 Silg41
TRINITY_DN10184_c0_g1	-1.75402	-0.0324428	-0.30666	-0.302163	0.578729	P05555	Itgam
TRINITY_DN10185_c0_g1	-4.7047	-1.18385	0.545704	1.10874	3.49324e-05	A2AJ76	Hmcn2
TRINITY_DN10185_c0_g2	-4.74384	-1.08677	-0.304842	0.878595	0.0795956	Q8R4Y4	Stab1 Feel1
TRINITY_DN10185_c0_g3	-4.05758	-0.0492971	1.36	1.50837	0.105616	Q8R4Y4	Stab1 Feel1
TRINITY_DN10187_c0_g1	-0.0257641	-1.40278	-0.110482	0.743979	0.242847	Q9DAM1	Lrrc34 Spata34
TRINITY_DN1019_c0_g1	-0.34888	-0.365559	-0.441636	-0.614816	0.393147	Q99JX7	Nxf1 Tap
TRINITY_DN101905_c0_g1	-0.682006	0.100046	0.00970266	-0.447292	0.979518	P61264	Stx1b Stx1b1 Stx1b2
TRINITY_DN10192_c0_g1	0.686638	-1.28593	0.143238	0.899687	0.270499	Q80VM3	Ttc29
TRINITY_DN101921_c0_g1	5.34205	4.82356	3.64798	3.45817	0.284275	Q8K5B8	Hoxc12 Hox-3.8 Hoxc-12
TRINITY_DN10195_c0_g1	-0.866933	-0.683432	-0.141112	0.248034	0.0979733	Q3UGP8	Alg10b
TRINITY_DN10198_c0_g1	-1.78472	0.400613	-0.279144	-0.338555	0.240964	P29268	Ccn2 betaIG-M2 Ctgf Fisp-12 Fisp12 Hcs24
TRINITY_DN10201_c8_g1	-0.2545	0.596423	-0.237887	-0.29909	0.617084	Q9WVF8	Tusc2 Fus1 Lgcc Pdap2
TRINITY_DN10204_c0_g1	-4.56331	-1.57435	2.11946	2.18614	0.000116559	P70172	Slc10a2 Ntcp2
TRINITY_DN10206_c0_g1	-0.255599	3.4095	2.1493	2.74168	#N/A	A2AV25	Fibcd1
TRINITY_DN10207_c0_g1	-2.13758	0.0284138	-0.248196	-0.804503	0.0376779	Q8BRG6	Klhl24
TRINITY_DN10212_c0_g1	-0.770407	-1.67933	-2.95312	-2.04083	0.268044	Q9ESD1	Prss8 Cap1
TRINITY_DN10214_c0_g1	-0.709032	0.664131	-0.0212483	0.297057	0.121607	Q91X34	Baat
TRINITY_DN10215_c0_g1	0.151225	1.43419	0.641051	0.822537	0.0413336	P49003	Bmp5 Bmp-5
TRINITY_DN10216_c0_g1	1.17605	0.32509	1.17537	1.51334	0.191366	Q9WUR2	Eci2 Peci
TRINITY_DN10217_c0_g1	-0.510426	-1.67899	1.89687	1.47008	0.0421038	Q8JZZ7	Adgrl2 Kiaa0786 Lphn2
TRINITY_DN10218_c0_g1	0.673583	0.287939	-0.00499387	0.162636	0.423605	Q9D4F8	Tubgcp4 D2Ertd435e Gcp4
TRINITY_DN10219_c0_g1	7.08569	4.91801	3.152	4.50728	0.00207758	Q9CWH4	Rec114
TRINITY_DN10225_c0_g1	0.576555	0.671326	0.361897	0.192181	0.295972	Q8BS35	Agmo Tmem195
TRINITY_DN10226_c0_g1	-2.36234	0.137297	1.67252	1.71496	1.71472e-06	P00184	Cyp1a1 Cyp1a-1
TRINITY_DN10228_c0_g1	0.727722	0.463672	-0.471078	0.94959	0.911998	Q11131	Fut7
TRINITY_DN10229_c0_g1	0.41813	1.34497	1.71691	1.57548	0.384979	Q3USZ8	Dipk2a
TRINITY_DN1023_c0_g1	-1.4698	0.518144	-0.295105	0.312161	0.0802152	O54891	Lgals6
TRINITY_DN10235_c0_g1	8.25249	5.87195	5.50704	6.48715	9.26219e-09	P97489	Gata5
TRINITY_DN1024_c0_g1	0.427465	0.549111	0.37591	0.320637	0.665577	Q8VCZ9	Prodh2 Hypdh
TRINITY_DN10240_c0_g1	3.94333	2.13123	1.22624	1.23218	0.0649196	Q8BYK4	Rdh12
TRINITY_DN10242_c0_g1	-4.2807	-2.71843	-0.662143	-0.316246	0.00060026	Q923L3	Csmd1
TRINITY_DN10250_c0_g1	1.4346	1.04489	1.07842	0.756245	0.000784908	Q8K2Z4	Ncapd2 Capd2 Cnap1 Kiaa0159
TRINITY_DN10251_c0_g1	0.155451	-1.17419	-0.638397	0.262049	0.658712	P57784	Snrpa1
TRINITY_DN10253_c0_g1	-4.59124	-1.70045	-0.279376	-3.51534	0.87682	E9Q555	Rnf213 Mystr
TRINITY_DN10254_c0_g1	-0.695204	-0.128253	0.0900507	0.357937	0.624128	O70209	Pdlim3
TRINITY_DN10256_c0_g1	-0.603155	0.52578	-0.0457168	-0.278194	0.751131	Q9QZM9	Fbxo16 Fbx16
TRINITY_DN10258_c0_g1	5.23655	3.9442	3.68426	4.00695	1.71969e-06	Q49B93	Slc5a12 Smct2
TRINITY_DN10259_c0_g1	1.20045	0.576354	1.40082	1.06424	0.506977	D3YZI9	Pgbd5
TRINITY_DN1026_c0_g1	0.553328	1.62652	2.48193	1.28918	2.55715e-07	Q8BHN7	0
TRINITY_DN102611_c0_g1	0.598292	0.803273	-3.56713	-3.70759	#N/A	Q8R151	Znfx1
TRINITY_DN10262_c0_g1	-2.49298	-0.262147	0.175429	0.451563	0.0109827	P17433	Spi1 Sfpi-1 Sfpi1
TRINITY_DN10264_c0_g2	0.360025	-0.913537	-0.976916	-0.927795	0.562181	Q9WUT7	Ccr9 Cmkbr10
TRINITY_DN10265_c0_g1	-0.679505	-0.650395	-0.345404	0.0907005	0.658337	P10076	Zfp26 Kiaa4196 Mkr3 Zfp-26
TRINITY_DN10267_c0_g1	1.04625	0.596975	1.0316	1.26807	0.909208	Q80WJ6	Abcc12 Mrp9
TRINITY_DN10268_c0_g1	2.67151	1.49357	1.72131	1.70025	0.151628	Q61153	Dio1 Itdi1 Txdi1
TRINITY_DN10269_c0_g1	-4.49689	0.635247	-0.297754	0.512162	#N/A	Q6NWW9	Fndc3b Fad104 Kiaa4164 Ns5abp37
TRINITY_DN1027_c0_g1	0.417026	-0.301059	0.361538	0.0313612	0.543855	Q5HZK1	Cep44 Kiaa1712
TRINITY_DN10273_c0_g1	-2.52291	-1.07428	-2.24946	-2.21147	0.477173	Q8BZM0	Klhl12 C3ip1
TRINITY_DN10275_c0_g1	-0.487581	-1.21122	-0.94815	-0.365426	0.0409115	Q8K4Q7	Cerk
TRINITY_DN1028_c0_g2	1.3797	0.10819	0.304347	0.343361	0.26076	Q9CZB0	Sdhc
TRINITY_DN10281_c0_g1	-1.44266	-1.66523	-1.3014	-0.566567	0.00160931	Q8BYN5	Fsd1l Ccdc10 Csdufd1 Fsd1nl
TRINITY_DN10282_c0_g1	-9.56728	-8.27914	-3.29562	-4.71604	0.00179825	Q11011	Npepps Psa
TRINITY_DN102845_c0_g1	1.2693	1.5345	3.74481	4.1531	#N/A	P17809	Slc2a1 Glut1
TRINITY_DN10285_c1_g1	-2.47153	-3.84809	-1.47407	0.463004	#N/A	Q6PA06	Atl2 Arl6ip2
TRINITY_DN10288_c0_g1	1.84664	1.21792	0.763736	0.645801	0.0394766	O89017	Lgmn Prsc1
TRINITY_DN10289_c0_g1	1.67184	-0.0539898	0.236974	0.632568	0.167383	Q9CQY6	Uqcc2 Mnf1
TRINITY_DN1029_c0_g1	0.100898	-0.126893	0.0833775	0.238424	0.911203	Q9D4P0	Arl5b Arl8
TRINITY_DN10292_c0_g1	2.05707	-0.0689974	0.0783549	0.777425	0.000397994	Q80YD1	Supv3l1 Suv3l1
TRINITY_DN10293_c0_g1	8.22514	5.43773	2.91098	5.04233	8.03623e-05	A2AG06	Meioc Gm1564
TRINITY_DN10294_c0_g1	0.337771	0.613021	2.11835	0.306342	0.0370612	Q8VCZ2	Tmem45b
TRINITY_DN102957_c0_g1	2.88153	5.36238	0.488007	1.3157	#N/A	P51942	Matn1 Cmp Crtm
TRINITY_DN10297_c0_g2	-0.448656	0.364709	-0.342354	-1.54721	0.7073	P31651	Slc6a12 Gabt2 Gat-2 Gat2
TRINITY_DN103_c0_g1	-0.685721	-1.00259	0.971446	0.872797	0.136113	Q9CPW0	Cntnap2 Kiaa0868
TRINITY_DN1030_c0_g1	-0.474301	0.53958	-0.136845	-0.0233459	0.0765759	Q80W71	Plekha8 Fapp2
TRINITY_DN10302_c0_g1	-2.83178	-1.61829	-2.20612	-1.76168	0.000391542	Q9JIP7	Slc15a1 Pept1
TRINITY_DN103030_c0_g1	-0.876446	0.415348	-1.22913	2.07443	0.881223	Q60754	Marco
TRINITY_DN10304_c0_g1	-0.212603	0.0283373	0.344208	0.082181	0.893368	Q68FG0	Zc4h2 Hca127 Kiaa1166
TRINITY_DN10305_c0_g1	5.45058	2.14864	0.194062	2.55908	7.06538e-05	P20918	Plg
TRINITY_DN10307_c0_g1	-0.811574	-1.31029	0.602414	-1.39421	4.5441e-05	Q9D4H7	Lonrf3 Rnf127
TRINITY_DN103070_c0_g1	-4.60155	-3.27267	-1.67103	-0.997293	0.00245628	Q3UUE9	Ankub1 Gm410
TRINITY_DN103074_c0_g1	-3.0817	0.600542	-6.14114	-3.1299	0.0542234	Q9Z2Y2	B4galt2
TRINITY_DN10308_c0_g1	0.546649	0.13077	-0.20691	-0.0949853	0.265741	Q9QZS2	Rnf4
TRINITY_DN1031_c0_g1	1.25049	0.388246	0.192974	0.178695	0.00745179	Q6P4T1	Snx19 Kiaa0254
TRINITY_DN103102_c0_g1	-1.09002	-3.46178	-4.27576	-2.94424	0.346839	Q80T79	Csmd3 Kiaa1894
TRINITY_DN10311_c0_g2	-2.0414	0.15575	0.770623	0.408122	0.243551	P22725	Wnt5a Wnt-5a
TRINITY_DN103110_c0_g2	1.35635	1.03359	0.564808	-0.0793639	0.906213	Q99NI3	Gtf2ird2
TRINITY_DN10312_c0_g1	7.85721	5.74865	5.40615	6.09892	1.66091e-10	P23950	Zfp36l1 Brf1 Tis11b
TRINITY_DN10313_c0_g1	3.96945	4.05152	3.81208	0.0669154	0.0214156	Q9QYZ9	Prss30 Disp Tmprss8
TRINITY_DN10319_c0_g1	-0.784381	-0.336701	-0.127361	-0.334021	0.886055	P53762	Arnt
TRINITY_DN1032_c0_g1	1.30595	0.729812	1.73988	1.5808	7.30411e-05	P24638	Acp2
TRINITY_DN10324_c0_g1	-4.46071	-5.00339	-2.29287	-0.792637	0.017234	Q03059	Chat
TRINITY_DN10326_c0_g1	-0.812377	-0.187479	0.319101	-0.0525929	0.00223879	Q8K1K4	Cenpi Fshprh1
TRINITY_DN10329_c0_g1	-0.445338	-0.427918	0.43033	-1.25746	0.140426	G5E861	Sclt1 Sap1
TRINITY_DN1033_c0_g1	1.94742	1.66278	0.930802	0.951571	0.135755	Q8BGX2	Timm29
TRINITY_DN1033_c2_g1	-1.82975	-1.60423	-0.864254	-0.216835	0.383973	Q6P5D4	Cep135 Cep4 Kiaa0635
TRINITY_DN1033_c3_g1	0.352738	-0.333531	-0.0182411	0.100602	0.678758	Q8BGS7	Cept1
TRINITY_DN10331_c0_g1	0.661843	0.100012	0.193985	0.156335	0.452258	Q8BG67	Efr3a Kiaa0143
TRINITY_DN10333_c0_g1	-1.39102	-0.96027	-1.21785	-1.02644	0.25524	Q8K0E3	Slc5a11 Kst1 Smit2
TRINITY_DN10334_c1_g1	-0.757789	0.580706	0.484949	-8.13179	0.0236582	Q9EQY0	Ern1 Ire1
TRINITY_DN10336_c0_g1	0.969479	0.283564	1.4445	1.29564	0.0965116	P70172	Slc10a2 Ntcp2
TRINITY_DN10337_c0_g1	0.3284	0.084095	-0.0317445	-0.236552	0.425813	Q8K4B0	Mta1
TRINITY_DN10338_c0_g1	-1.94484	-0.283817	-0.202332	-0.836188	0.298168	Q80Z71	Tnn Tnw
TRINITY_DN10339_c1_g1	-0.467496	-0.0100985	-0.296095	0.244398	0.983588	Q6PA06	Atl2 Arl6ip2
TRINITY_DN1034_c0_g1	0.153055	-0.528789	0.0798924	0.0395004	0.940205	Q8C0T7	Mfsd9
TRINITY_DN10340_c0_g1	1.01727	0.047768	-0.187265	0.357334	0.454523	Q504N2	Slc22a15
TRINITY_DN10341_c1_g1	-0.618134	0.902697	0.372524	1.21834	0.791673	E9Q555	Rnf213 Mystr
TRINITY_DN10341_c1_g2	1.13709	0.338243	0.767035	1.45127	0.743556	Q9WTN6	Slc22a21 Octn3 Slc22a9
TRINITY_DN10342_c0_g1	1.07775	0.185597	-0.691302	0.985818	0.405978	Q99LB2	Dhrs4 D14Ucla2
TRINITY_DN10343_c0_g1	1.79334	0.067552	0.725406	1.20318	0.0154034	Q9CWP6	Mospd2
TRINITY_DN10344_c0_g1	0.413896	0.435367	0.770546	1.07455	0.0983786	Q7TSH8	Tmem94 Kiaa0195
TRINITY_DN10346_c0_g1	-0.33129	-0.728844	-1.02257	-0.335485	0.348517	Q5SSF7	Tent5c Fam46c
TRINITY_DN10346_c0_g2	-1.03717	-0.194077	0.693429	-0.136021	0.283997	Q5SSF7	Tent5c Fam46c
TRINITY_DN10348_c0_g1	-2.02002	-0.750932	-0.957356	-0.675266	0.124548	P55144	Tyro3 Dtk Rse Tif
TRINITY_DN10351_c0_g1	-3.69457	-1.59308	-3.27653	-4.28462	0.0867571	Q8BN82	Slc17a5
TRINITY_DN10351_c1_g1	-1.03614	0.827623	1.54944	1.92274	#N/A	O35379	Abcc1 Abcc1a Abcc1b Mdrap Mrp
TRINITY_DN10353_c0_g1	-2.5346	-1.90235	1.40292	1.1406	0.000774991	Q8VCW8	Acsf2
TRINITY_DN10353_c0_g2	-4.37101	0.933156	1.5431	1.44454	0.152343	P41216	Acsl1 Acsl2 Facl2
TRINITY_DN10354_c0_g1	1.03014	-0.110642	0.183931	0.399078	0.197385	Q8CFA2	Amt
TRINITY_DN10355_c0_g1	-3.88658	-0.864337	0.371446	1.08551	0.0033742	P54116	Stom Epb7.2 Epb72
TRINITY_DN10355_c1_g1	-1.70228	-0.514823	0.339021	-0.388075	0.568755	Q9WTN6	Slc22a21 Octn3 Slc22a9
TRINITY_DN10358_c0_g1	-0.565755	-1.63205	-1.53908	-0.701587	0.0317993	Q60676	Ppp5c
TRINITY_DN10358_c1_g1	2.21822	-0.236453	1.39131	1.47554	0.180768	Q91V51	Ttll1
TRINITY_DN1036_c0_g1	-0.219471	-0.0906303	-0.376168	-0.499609	0.745067	O70311	Nmt2
TRINITY_DN10360_c0_g1	0.894644	1.75478	0.97779	0.863906	0.757951	Q9WV72	Asb3
TRINITY_DN10363_c0_g1	-0.410132	0.146594	0.69235	0.285974	0.629012	Q80TS3	Adgrl3 Kiaa0768 Lec3 Lphn3
TRINITY_DN10364_c0_g1	-0.359345	-0.465077	-0.44781	-0.495566	0.727364	Q9DBP5	Cmpk1 Cmk Cmpk Uck Umk Umpk
TRINITY_DN10365_c0_g1	-0.129557	-0.15782	0.0198481	0.103372	0.990634	Q62273	Slc26a2 Dtd Dtdst
TRINITY_DN10367_c0_g1	-1.73345	-0.700702	-0.308314	-0.070609	0.336455	Q80WQ9	Zbed4 Kiaa0637
TRINITY_DN1037_c0_g1	-1.91668	-0.86629	-1.0939	-0.915158	0.0123547	Q8BGS1	Epb41l5 Epb4.1l5 Kiaa1548
TRINITY_DN10373_c0_g1	-0.0895235	-0.0388155	0.45384	0.393713	0.92988	P58021	Tm9sf2
TRINITY_DN10375_c0_g1	-0.556435	0.948596	1.31632	1.32729	0.415793	Q9DB29	Iah1
TRINITY_DN10376_c0_g1	-1.55043	-0.604138	-0.415499	-0.171202	0.259465	Q99NH7	Slc26a5 Pres
TRINITY_DN10377_c0_g1	1.55959	0.909877	0.436003	0.395983	0.00511995	Q9ESN6	Trim2 Kiaa0517 Narf
TRINITY_DN1038_c0_g1	-1.63702	-2.19202	-0.52217	-0.837917	0.00417454	Q9JJS0	Scube2 Cegp1
TRINITY_DN10380_c0_g1	0.483498	0.859252	2.74214	0.365462	0.248555	P11369	Pol Gm17492
TRINITY_DN10381_c0_g1	1.26912	1.61458	-0.0423675	-3.94213	0.084559	P37242	Thrb Erba2 Nr1a2
TRINITY_DN10383_c0_g1	0.0798654	0.104378	-0.0462108	-0.11417	0.959482	Q69ZZ6	Tmcc1 Kiaa0779
TRINITY_DN10384_c0_g1	0.79952	0.105232	0.594363	0.55951	0.7404	Q60988	Stil Sil
TRINITY_DN10386_c0_g1	0.0646272	0.0277062	0.142979	0.25914	0.983846	Q9CPU4	Mgst3
TRINITY_DN10387_c0_g1	0.22248	-0.168096	-0.188047	-0.214417	0.681297	A2A432	Cul4b mKIAA0695
TRINITY_DN1039_c0_g1	1.54496	0.737065	0.476328	0.415561	0.0635095	B1AXD8	Akirin2
TRINITY_DN10390_c0_g1	-0.557229	0.0230115	-0.242254	-0.686051	0.945505	P11930	Nudt19 D7Rp2e
TRINITY_DN10391_c0_g1	-0.344961	-0.0774073	-0.070514	-0.128925	0.970321	Q3UEB3	Puf60
TRINITY_DN103931_c0_g1	-4.59622	0.23837	0.194391	1.09077	0.0432345	P23819	Gria2 Glur2
TRINITY_DN10396_c0_g1	-0.890377	-0.416288	-0.82427	-0.853344	0.216499	Q8R242	Ctbs
TRINITY_DN103980_c0_g1	-4.91524	-1.11112	-2.30422	0.681177	0.61083	Q1HKZ5	Map3k13
TRINITY_DN104_c0_g1	-0.707979	0.647923	0.540994	0.357619	0.0214511	Q9D2G9	Hhipl2 Hhip3 Kiaa1822l
TRINITY_DN10402_c1_g1	0.103951	0.284937	0.0264024	0.0557958	0.990054	P35761	Ttk Esk
TRINITY_DN10403_c0_g1	-0.67515	0.151839	0.0268681	-0.229613	0.845507	Q8BZR9	Ncbp3
TRINITY_DN10405_c0_g1	0.274536	0.194339	0.265269	0.161323	0.79182	Q7TT37	Elp1 Ikap Ikbkap
TRINITY_DN10406_c0_g1	-0.384431	-2.25826	-1.00387	-0.139113	0.154172	Q9D4W2	Mfi
TRINITY_DN10407_c0_g1	0.541061	0.0467693	3.35646	2.74064	0.0056133	Q8BYF6	Slc5a8 Smct Smct1
TRINITY_DN10407_c0_g2	1.87515	1.3135	2.20191	1.29549	0.194089	Q49B93	Slc5a12 Smct2
TRINITY_DN10408_c0_g1	-3.07143	-0.000407862	2.01621	0.764321	1.87378e-06	Q9CZR2	Naalad2
TRINITY_DN1041_c0_g1	-1.97833	-1.86655	-0.774889	-0.265759	0.113642	Q08091	Cnn1
TRINITY_DN10415_c0_g1	-0.408862	0.138939	-0.209227	-0.169513	0.446824	Q64446	Atp7b Wnd
TRINITY_DN10417_c0_g1	-0.415769	-0.23318	-0.329606	-0.340091	0.937896	Q9D0K2	Oxct1 Oxct Scot
TRINITY_DN10418_c0_g1	-2.65809	-1.01893	-0.997053	-2.1275	0.112853	Q9WTS2	Fut8
TRINITY_DN104195_c0_g1	-1.72467	-0.539289	-0.0611207	-0.137301	0.00510835	Q62441	Tle4 Grg4
TRINITY_DN1042_c1_g1	0.0648171	-0.273476	0.0874691	-0.236739	0.984381	B2RX14	Tut4 Kiaa0191 Zcchc11
TRINITY_DN10424_c0_g1	0.635476	-0.187344	-0.00266112	0.717567	0.39835	Q3UZW7	Eef2kmt Fam86 Fam86a
TRINITY_DN10424_c1_g2	1.95463	0.778782	1.27087	0.957378	0.0229153	Q9D0T2	Dusp12
TRINITY_DN10427_c1_g1	-0.184902	1.61383	0.0897708	4.68777	0.0504063	P63260	Actg1 Actg
TRINITY_DN10429_c0_g1	0.303002	-0.699768	0.0872513	0.377329	0.368244	P54071	Idh2
TRINITY_DN1043_c0_g1	0.0248824	0.0776943	0.173864	0.106119	0.990054	Q11127	Fut4 Elft
TRINITY_DN1043_c2_g1	0.495872	0.0772198	-0.0255988	0.210714	0.655236	Q9CQH3	Ndufb5
TRINITY_DN10432_c0_g1	-1.03167	-0.91577	-1.2618	-1.95448	0.367293	Q9QY96	Casr Gprc2a
TRINITY_DN10433_c0_g2	0.797685	-0.331259	-0.152644	0.456684	0.35962	A6H694	Lrrc63
TRINITY_DN10435_c0_g1	-0.25432	-0.501473	-0.305318	-0.0767813	0.709001	Q9QZN0	Fbxo15 Fbx15
TRINITY_DN10436_c0_g1	-1.59856	-1.24949	-3.32424	-0.692739	0.682599	Q8K221	Arfip2
TRINITY_DN10439_c0_g1	-1.2819	-0.935122	-1.43411	-2.13598	0.000511919	P05555	Itgam
TRINITY_DN1044_c0_g1	0.949311	0.570701	0.472318	1.02982	0.151919	Q3THW5	H2az2 H2afv H2av
TRINITY_DN104477_c0_g1	-1.04298	0.634503	3.42211	4.91836	#N/A	Q60963	Pla2g7 Pafah
TRINITY_DN104478_c0_g1	0.0808287	0.897203	-0.316467	-2.89588	0.451222	P21956	Mfge8
TRINITY_DN10448_c0_g2	0.122085	0.205574	0.296038	0.438022	0.867906	Q93092	Taldo1 Tal Taldo
TRINITY_DN10449_c0_g1	0.87591	0.0581715	0.113183	0.784472	0.785284	Q6GV12	Kdsr Fvt1
TRINITY_DN1045_c0_g1	0.190597	-0.216948	-0.3641	-0.445144	0.523334	Q9R1Q9	Atp6ap1 Atp6ip1 Atp6s1
TRINITY_DN10450_c0_g1	4.51514	4.23202	1.68287	2.97913	0.00688858	P08043	Zfp2 Fnp-2 Mkr2 Zfp-2
TRINITY_DN10450_c0_g2	6.35337	2.53412	4.25472	4.12258	0.0486083	Q8BQN6	Znf146 Ozf Zfp146
TRINITY_DN10450_c0_g4	-1.04301	4.15305	1.91424	3.40467	#N/A	Q8BQN6	Znf146 Ozf Zfp146
TRINITY_DN10453_c0_g1	0.800806	0.461891	0.664402	0.827408	0.761277	Q8BUI3	LRWD1 Orca
TRINITY_DN10456_c0_g1	1.25444	0.118623	-0.0268349	0.280205	0.00601649	B1AY10	Nfx1
TRINITY_DN10457_c0_g1	-0.625672	-1.00304	-0.76855	-1.12555	0.701421	Q8C9E8	Calhm6 Fam26f
TRINITY_DN10458_c0_g1	0.0186366	1.45802	0.0356847	-0.408247	0.0714346	Q8BRG6	Klhl24
TRINITY_DN10459_c0_g1	1.05382	0.384905	0.602722	0.694503	0.20591	Q9JJC8	Nipa2 MNCb-2146
TRINITY_DN1046_c0_g1	0.252221	0.0498521	-0.434732	-0.15753	0.857684	Q9Z0S9	Rabac1 Pra Pra1 Praf1
TRINITY_DN10460_c0_g1	-1.25167	-1.15702	-0.560014	-0.982575	0.300571	P11369	Pol Gm17492
TRINITY_DN10463_c0_g1	7.44684	3.68326	2.61453	4.83756	4.72728e-11	Q01102	Selp Grmp
TRINITY_DN10464_c0_g1	-0.248403	-0.544466	-0.186151	-0.537749	0.84994	Q9CW79	Golga1
TRINITY_DN104667_c0_g1	-1.2057	-1.4111	-1.38347	-0.816669	0.821959	Q8BZM0	Klhl12 C3ip1
TRINITY_DN10468_c0_g1	1.50788	0.607071	0.192806	0.148126	0.00229774	Q9CWH6	Psma8 Psma7l
TRINITY_DN1047_c0_g1	-0.254814	-0.0105629	-0.0653493	-0.237052	0.940077	Q8BH24	Tm9sf4 Kiaa0255
TRINITY_DN10471_c0_g1	8.62304	3.00238	0.629671	5.37356	3.47539e-07	Q6X893	Slc44a1 Cd92 Cdw92 Ctl1
TRINITY_DN10473_c0_g1	-2.28178	0.390978	-0.675452	-0.447126	0.712952	Q6TDP3	Klhl17
TRINITY_DN10477_c0_g1	1.44644	0.504649	0.793821	0.335625	0.706844	Q9DBC0	Selenoo Selo
TRINITY_DN10479_c0_g2	1.55382	3.68395	1.51394	2.57769	0.257312	D3YZI9	Pgbd5
TRINITY_DN10479_c0_g3	1.00215	0.00719579	0.60947	0.0683189	0.235596	Q9D4H7	Lonrf3 Rnf127
TRINITY_DN1048_c0_g1	-0.42169	-0.34855	-0.39109	-0.926961	0.362072	Q9JKF1	Iqgap1
TRINITY_DN10480_c0_g1	-1.33866	-0.949636	-1.01999	-1.15066	0.04687	Q5SWW4	Med13 Kiaa0593 Thrap1 Trap240
TRINITY_DN104805_c0_g1	1.38275	2.1023	0.58197	1.57183	#N/A	P30412	Ppic Cypc
TRINITY_DN10482_c0_g1	0.293094	-0.249856	-0.182751	-0.342459	0.860297	Q3U155	Ccdc174
TRINITY_DN10483_c0_g1	-0.692609	-1.76852	-1.21296	-0.583089	0.0613145	Q99ME3	Sncaip
TRINITY_DN10486_c0_g1	-0.14412	-0.233313	-0.293398	-0.136904	0.674711	P56212	Arpp19
TRINITY_DN104888_c0_g1	-2.47407	-2.2495	1.14218	2.50092	#N/A	O88310	Itln1 Intl Itln Itln1a Itlna
TRINITY_DN10489_c0_g1	0.880323	0.0455813	1.0558	0.666077	0.486631	Q9DBM1	Gpatch1 Gpatc1
TRINITY_DN10489_c1_g1	-0.0750051	-0.200864	-0.354891	-0.285264	0.979278	Q8C7V8	Ccdc134
TRINITY_DN1049_c0_g1	0.649408	0.313843	0.427593	0.467733	0.373035	Q99J39	Mlycd
TRINITY_DN10492_c0_g1	0.475521	-0.285209	-0.205328	-0.00853939	0.28496	P70665	Siae Ysg2
TRINITY_DN10493_c0_g1	0.743887	0.307686	0.184634	-0.110827	0.790433	Q9CR41	Hypk
TRINITY_DN10496_c0_g2	-0.154252	-0.00778568	-0.506442	-0.372878	0.61798	Q9JMJ2	Fbxw4 Fbw4
TRINITY_DN10497_c0_g1	-0.861415	-0.552047	-0.236652	0.302371	0.846005	P11369	Pol Gm17492
TRINITY_DN10499_c0_g1	-3.67174	2.02594	-1.65038	2.93384	#N/A	Q8BZM0	Klhl12 C3ip1
TRINITY_DN105_c0_g1	-1.12251	-0.441036	-0.411219	-0.345909	0.209472	B2RSH2	Gnai1 Gnai-1
TRINITY_DN1050_c0_g1	-1.18233	-0.177339	-0.808806	-0.825623	0.136113	O88572	Lrp6
TRINITY_DN10500_c0_g1	-0.743882	-0.487546	-1.08494	-1.52701	0.0183814	P22605	Rarb Nr1b2
TRINITY_DN10506_c0_g2	0.541354	0.262743	0.458103	0.49517	0.934262	P10076	Zfp26 Kiaa4196 Mkr3 Zfp-26
TRINITY_DN10506_c0_g4	1.50456	0.562447	0.252516	0.609984	0.291915	Q8C827	Zfp62
TRINITY_DN10506_c0_g5	0.268472	0.720646	0.542215	0.680499	0.816974	Q80W31	Znf569 Zfp74
TRINITY_DN10509_c0_g1	-0.247769	-0.0804715	-0.356378	-0.65032	0.875274	Q9CUS9	Sppl3 Imp2 Psl4 Usmg3
TRINITY_DN10510_c1_g1	0.651098	-6.09463	-2.90036	1.21906	0.794046	A2AVA0	Svep1
TRINITY_DN10513_c0_g1	0.66516	1.40685	1.94871	0.757815	0.122536	Q8K097	Faim2 Kiaa0950 Lfg Lfg2 Nmp35
TRINITY_DN105140_c0_g1	1.31511	1.30992	2.56757	1.77324	0.192621	P49282	Slc11a2 Dct1 Dmt1 Nramp2
TRINITY_DN105151_c0_g1	1.60476	0.622897	0.353771	0.95533	0.38426	Q9CPV1	Ska1
TRINITY_DN10516_c0_g1	0.441555	-0.100462	-0.0796806	-0.0811195	0.79622	Q9CWN7	Cnot11 D1Bwg0212e
TRINITY_DN10516_c0_g2	0.799839	0.58697	0.0448119	0.345133	0.205275	Q9CWN7	Cnot11 D1Bwg0212e
TRINITY_DN1052_c0_g1	0.328716	-0.0978686	-0.0670684	0.0144754	0.835102	Q5HZJ0	Drosha Etohi2 Rn3 Rnasen
TRINITY_DN105225_c0_g1	0.936019	-1.30533	2.44304	0.634836	0.130265	P17156	Hspa2 Hcp70.2 Hsp70-2
TRINITY_DN10523_c0_g1	-0.541254	-0.758865	-0.391699	0.43099	0.344426	A2A870	Fbf1
TRINITY_DN10527_c0_g1	0.244244	0.51755	0.253143	0.0695826	0.933726	Q80YR4	Znf598 Zfp598
TRINITY_DN10528_c0_g1	-0.207162	-0.0280786	-0.130746	-0.250463	0.9624	Q3UN02	Lclat1 Agpat8 Alcat1 Gm91 Lycat
TRINITY_DN10530_c0_g1	-0.803938	-0.120708	0.107948	0.270836	0.280888	Q6DTY7	Pfkfb4
TRINITY_DN10532_c0_g2	-3.06702	-2.77685	-1.4803	-2.39422	0.0495268	Q9QWG7	Sult1b1
TRINITY_DN10533_c0_g1	-0.146601	0.45079	0.416027	0.0611331	0.655236	Q8BGF7	Pan2 Kiaa0710 Usp52
TRINITY_DN10536_c0_g1	1.9147	1.23772	1.17732	1.04244	0.0107655	Q8BUV3	Gphn
TRINITY_DN10537_c0_g1	-0.608976	-0.123767	-0.556642	-0.0973639	0.783486	Q2MV57	Tctn2 Tect2
TRINITY_DN1054_c0_g1	2.74804	1.71245	1.41765	1.51825	5.57123e-06	P49717	Mcm4 Cdc21 Mcmd4
TRINITY_DN10541_c0_g1	-2.31155	-0.782951	-0.642998	-0.24865	0.0908196	Q8VCW8	Acsf2
TRINITY_DN10543_c0_g1	1.49813	0.58134	0.665597	0.329475	0.0265792	Q6NZB0	Dnajc8
TRINITY_DN10545_c0_g1	-0.301652	-0.684543	-0.566094	-0.498431	0.198235	Q99PI5	Lpin2
TRINITY_DN1055_c1_g1	-2.03213	0.112858	-0.814699	-1.60855	0.433582	A2AVA0	Svep1
TRINITY_DN10551_c0_g1	0.10881	2.33877	2.87302	2.41374	0.00313384	Q80V53	Chst14 D4st1
TRINITY_DN10556_c0_g2	0.800336	0.968481	-1.56073	-0.310388	0.749206	Q8CGF5	Tlcd4 Tmem56
TRINITY_DN10557_c0_g1	-1.00168	-0.265249	-0.249096	-0.751814	0.578981	Q8BH48	Ubap1
TRINITY_DN10559_c0_g1	-1.42366	-0.932441	-0.716252	-0.637003	0.458956	Q8C761	Wdr60
TRINITY_DN1056_c0_g1	-0.255498	-3.33724	0.167307	0.449184	0.678206	P58801	Ripk2
TRINITY_DN1056_c0_g2	-0.0840267	-0.0996466	-0.392488	-0.304233	0.978117	Q8BZ25	Ankk1
TRINITY_DN10561_c0_g1	-2.85293	-2.32526	-3.08082	-2.12794	2.23381e-08	Q8BN82	Slc17a5
TRINITY_DN10562_c0_g1	0.245004	-0.291015	0.286723	0.289206	0.933795	Q7TS68	Nsun6
TRINITY_DN10563_c0_g1	-0.173479	-0.272098	-0.220261	-0.196441	0.958165	Q8CD26	Slc35e1
TRINITY_DN10566_c0_g1	-0.567809	-0.416514	-0.200872	-0.399602	0.83598	Q8K284	Gtf3c1
TRINITY_DN10567_c0_g2	-0.701663	0.572847	0.807503	-0.924294	0.662498	Q9EQY0	Ern1 Ire1
TRINITY_DN10568_c0_g1	-0.0793843	0.53335	0.456617	-0.335007	0.73235	Q9CZ49	Klhl35
TRINITY_DN10569_c0_g1	0.779031	0.273306	0.379836	0.505579	0.773553	Q3UJV1	Ccdc61 Gm159
TRINITY_DN1057_c0_g1	-0.309341	-0.580076	-0.231822	-0.681417	0.455482	Q8C0C7	Farsa Farsla
TRINITY_DN10570_c0_g1	-0.870003	-0.466009	-0.498002	-1.16875	0.00700987	O08750	Nfil3 E4bp4
TRINITY_DN10571_c0_g1	1.17418	1.39439	0.690547	0.0860931	0.176234	Q8BML2	Oacyl
TRINITY_DN10573_c0_g1	-1.97041	-1.00433	0.460533	0.295396	0.349943	Q8BN82	Slc17a5
TRINITY_DN10574_c0_g1	0.880442	-0.2433	0.644298	0.334523	0.803933	Q9QXA6	Slc7a9 Bat1
TRINITY_DN10576_c0_g1	1.87403	0.8356	0.63144	1.12988	0.000830997	Q8BYA0	Tbcd
TRINITY_DN10578_c0_g1	-1.82519	-0.340935	-0.510212	-0.821808	0.16132	Q8C8R3	Ank2 AnkB
TRINITY_DN1058_c1_g2	-2.99268	-0.065785	-0.333092	0.0448283	0.536492	Q8BQ86	Chst8
TRINITY_DN10580_c0_g1	4.29488	3.65299	2.99056	2.74996	0.00704894	Q9EQB9	Znf287 Skat2 Zfp287
TRINITY_DN10584_c0_g1	1.28056	0.613913	1.58651	1.50356	0.460847	D3Z7H8	Cilp2
TRINITY_DN10587_c0_g1	0.0809897	0.151438	0.129696	0.191442	0.998105	Q8BT60	Cpne3 Kiaa0636
TRINITY_DN1059_c0_g1	-1.66698	-2.1357	-2.39947	-1.94692	7.74254e-05	Q9Z2F7	Bnip3l Nix
TRINITY_DN10590_c0_g1	0.509543	-0.0672849	-0.048332	1.02902	0.610097	Q9CR40	Klhl28 Btbd5
TRINITY_DN10590_c3_g1	1.11087	0.443855	1.54859	2.76144	#N/A	P28575	Ipp Mipp
TRINITY_DN10593_c0_g1	0.149895	0.212268	0.323031	0.47021	0.808093	Q9DB40	Med27 Crsp8
TRINITY_DN10594_c0_g1	0.226663	-0.482725	-0.169833	-0.342852	0.829441	Q99L45	Eif2s2
TRINITY_DN105949_c0_g2	-6.54615	-2.23265	-0.851397	0.558712	0.0249091	Q8K2D6	Dctd
TRINITY_DN10595_c0_g1	-0.275758	-0.484539	-0.321492	-0.497371	0.186152	Q8R3V6	Cuedc1
TRINITY_DN10597_c0_g2	0.255736	-0.231795	-0.342474	-0.271297	0.0615792	Q9Z1M8	Ik Red Rer
TRINITY_DN10599_c0_g1	0.754567	-0.146012	-0.225892	0.0914855	0.700157	Q9D5R3	Cep83 Ccdc41
TRINITY_DN106_c0_g1	-0.115614	1.22478	-0.351384	-0.504378	0.179683	A2ARV4	Lrp2
TRINITY_DN1060_c0_g1	0.985361	0.948785	0.628521	0.813544	0.260662	Q9CZP0	Ufsp1 D5Ertd655e
TRINITY_DN10600_c0_g1	-1.01757	-0.193174	1.33032	0.628251	0.136831	Q9Z1L4	Rs1 Rs1h Xlrs1
TRINITY_DN10605_c0_g2	0.117067	1.20807	0.286912	0.0311388	#N/A	E9Q4F2	Klhl18
TRINITY_DN10606_c0_g1	-0.0107176	-0.4615	-0.867838	-1.02503	0.0468546	Q9Z0H1	Wdr46 Bing4
TRINITY_DN10607_c1_g2	-0.370875	-0.632191	-0.441433	-0.309336	0.497027	Q9CZQ9	Bbs5
TRINITY_DN1061_c0_g1	0.0249051	-0.194837	0.0899422	-0.13609	0.975645	Q80TS3	Adgrl3 Kiaa0768 Lec3 Lphn3
TRINITY_DN10614_c0_g1	2.7055	2.37059	1.25758	-0.0749002	0.152836	Q6A4L0	Slc22a13 Orctl3
TRINITY_DN10622_c0_g1	-0.36485	-0.448101	-0.60398	-0.508856	0.100615	Q924S7	Spred2
TRINITY_DN10623_c0_g1	-1.02923	-0.692562	-0.930174	-1.56538	0.268475	Q8R0A7	Kiaa0513
TRINITY_DN106237_c0_g1	-2.42664	1.43088	0.704571	-0.116462	0.357871	Q64732	Foxb1 Fkh5 Foxb1a Foxb1b Mf3
TRINITY_DN10624_c0_g1	-0.97537	-0.804753	2.04024	1.18054	0.00881983	P18052	Ptpra Lrp Ptpa
TRINITY_DN10624_c0_g2	-2.50183	-1.59098	-0.228661	-3.3249	0.0867968	P49446	Ptpre Ptpe
TRINITY_DN10624_c0_g3	-0.840872	-0.877222	-1.92398	-2.00707	0.409574	P18052	Ptpra Lrp Ptpa
TRINITY_DN10628_c0_g1	-0.629242	-0.108927	0.331267	-0.727852	0.909885	Q9D826	Pipox Pso
TRINITY_DN1063_c0_g1	-0.16792	-0.0632692	-0.144272	-0.556825	0.886769	Q921W0	Chmp1a Chmp1 Pcoln3
TRINITY_DN1063_c1_g1	1.10109	0.070931	0.20294	0.0725473	0.0910143	Q9D0A0	Det1
TRINITY_DN10630_c0_g1	0.780274	0.55935	0.191513	0.0718789	0.694445	Q9CRY7	Gdpd1 Gde4
TRINITY_DN10634_c0_g1	0.805355	1.54051	1.03835	0.890613	0.380624	Q91W61	Fbxl15 Fbxo37
TRINITY_DN10635_c0_g1	0.74537	0.129941	0.660962	0.443942	0.666067	Q9R1S3	Pign
TRINITY_DN10640_c0_g1	0.466342	-0.0242031	-0.137121	-0.121037	0.513211	Q9CQN1	Trap1 Hsp75
TRINITY_DN10642_c0_g1	0.16032	1.00647	1.08162	1.77609	0.0405292	Q8BZM0	Klhl12 C3ip1
TRINITY_DN10647_c0_g1	8.27833	3.73854	2.91833	5.31393	6.50554e-09	Q8C1R0	Tssk5
TRINITY_DN10648_c0_g1	0.534652	0.0526838	-0.136728	-0.239366	0.0107136	Q91WM3	Rrp9 Rnu3ip2 U3-55k
TRINITY_DN1065_c0_g1	2.30307	0.536318	1.684	0.474796	0.184576	Q9JJL3	Slco1b2 Oatp1b2 Slc21a10
TRINITY_DN1065_c0_g2	1.70023	-0.00717879	0.938112	0.459051	0.415869	Q8BXB6	Slco2b1 Oatp2b1 Slc21a9
TRINITY_DN10650_c0_g1	3.0485	2.55586	2.85425	2.84336	0.149721	Q8CE33	Klhl11
TRINITY_DN10651_c0_g1	-1.02431	-1.5415	-0.0634331	-0.32031	0.136978	Q8BP22	Fam92a Fam92a1
TRINITY_DN10653_c0_g1	-1.30561	-0.66678	-0.181228	0.508868	0.322166	Q9QY96	Casr Gprc2a
TRINITY_DN10656_c0_g1	1.22242	0.16668	1.73484	0.945725	0.053644	Q9CQE8	RTRAF
TRINITY_DN10656_c3_g1	2.16736	-0.868556	0.452448	0.365693	0.231922	Q8BZB2	Ppcdc Coac
TRINITY_DN10659_c0_g1	1.13628	2.07202	1.84988	0.8042	0.091439	Q8BFQ6	Slc49a4 Dirc2
TRINITY_DN1066_c0_g1	1.78924	0.563634	0.4577	0.0367973	0.0414942	Q9D8W5	Psmd12
TRINITY_DN10666_c0_g1	2.49844	0.839611	1.3851	2.51745	0.000241957	E9PVX6	Mki67
TRINITY_DN10667_c0_g1	-0.698876	0.80799	0.68116	0.00766488	0.542866	Q7M732	Rtl1 Mar1 Mart1 Peg11
TRINITY_DN10667_c0_g2	0.0972122	-1.65891	0.0497865	0.453009	0.288049	Q920N1	Odf3 Shippo1 Beta390
TRINITY_DN10668_c0_g1	-0.391882	-2.11366	-1.38234	-2.38551	0.373717	Q60821	Zbtb17 Zfp100 Znf151
TRINITY_DN10669_c0_g1	2.11238	0.800346	0.831608	1.31493	4.64628e-05	P10076	Zfp26 Kiaa4196 Mkr3 Zfp-26
TRINITY_DN1067_c0_g1	0.488077	-0.040506	-0.204671	0.0929539	0.509304	Q8BZM0	Klhl12 C3ip1
TRINITY_DN10671_c0_g1	0.36613	0.595015	0.323186	-0.619059	0.590629	Q9D2Q2	Trmt44 Mettl19
TRINITY_DN10675_c0_g1	0.419141	0.0517045	-0.0604448	-0.181064	0.591018	Q80Y83	Dixdc1 Ccd1 Kiaa1735
TRINITY_DN10676_c0_g1	-1.44116	-0.678316	-0.472677	-0.0489864	0.012891	Q91ZR4	Nek8 Jck
TRINITY_DN10677_c0_g1	7.228	4.88764	3.39052	4.87939	4.59153e-08	Q924M5	Boll Boule
TRINITY_DN10679_c0_g2	0.479223	-0.248673	-0.162529	0.145662	0.319726	P62331	Arf6
TRINITY_DN10680_c0_g1	-1.64303	-0.46601	-0.243327	-0.56779	0.58082	O70451	Slc16a7 Mct2
TRINITY_DN10681_c0_g1	1.23501	1.99157	2.12872	1.71039	0.0833437	Q64669	Nqo1 Dia4 Nmo1 Nmor1
TRINITY_DN10681_c1_g1	2.25807	1.51115	1.30497	1.28768	0.166589	Q9JI75	Nqo2 Nmor2
TRINITY_DN10682_c0_g2	-1.79627	1.90078	2.0532	2.82566	0.00293934	P0CG49	Ubb
TRINITY_DN10684_c0_g1	-0.0317877	-0.767472	-0.737096	-0.013507	0.779577	Q0KK59	Unc79 Kiaa1409
TRINITY_DN10687_c0_g1	-1.39301	0.387101	0.398091	0.330275	0.37677	Q11131	Fut7
TRINITY_DN10689_c0_g1	-1.42299	1.12505	1.25103	0.812783	0.815556	P56677	St14 Prss14
TRINITY_DN1069_c0_g1	-1.14168	1.3656	0.762258	0.842305	0.000210025	Q01149	Col1a2 Cola2
TRINITY_DN10690_c0_g1	1.87288	1.20229	0.888731	0.634581	0.450076	Q6PA06	Atl2 Arl6ip2
TRINITY_DN10692_c0_g1	-0.972399	-0.153407	1.00459	0.639005	0.372711	Q2LKU9	Nlrp1a Card7 Nalp1 Nalp1a Nlrp1
TRINITY_DN10693_c0_g1	0.829876	0.401321	0.585413	1.28269	0.820307	P28575	Ipp Mipp
TRINITY_DN10694_c0_g1	0.371502	0.115016	1.01479	0.842165	0.196104	Q8BRU6	Slc18a2 Vmat2
TRINITY_DN10695_c0_g1	0.458113	-0.329	0.210108	-0.733837	0.35057	Q710D3	Unc93a
TRINITY_DN10695_c0_g2	0.445669	0.101774	0.479358	-1.71423	0.311625	Q710D3	Unc93a
TRINITY_DN10697_c0_g1	-2.93392	0.148915	-1.6186	-0.0345594	0.616964	Q9EQY0	Ern1 Ire1
TRINITY_DN10698_c0_g1	-0.516087	-1.22807	-1.18184	-1.79217	0.27409	Q64264	Htr1a Gpcr18
TRINITY_DN107_c0_g1	-1.19797	-0.205556	-0.850871	-0.795737	0.00351681	Q67BT3	Slc13a5 Nact
TRINITY_DN107_c0_g2	-0.0064902	-0.241914	0.199558	0.165272	0.987668	Q9WUT7	Ccr9 Cmkbr10
TRINITY_DN1070_c0_g1	-2.09185	-1.72013	-0.714411	-1.05559	3.007e-06	Q9QX15	Clca3a1 Clca1
TRINITY_DN10700_c0_g2	-0.717108	0.109855	-0.150951	0.375982	0.839963	P23979	Htr3a 5ht3 Htr3
TRINITY_DN10704_c0_g1	0.319717	0.251238	0.106288	0.196066	0.955236	Q9CWL8	Ctnnbl1
TRINITY_DN10706_c0_g1	2.41972	0.158306	0.101336	0.645308	4.84713e-05	Q9D0L4	Adck1
TRINITY_DN10707_c0_g1	-0.15902	0.688839	0.441559	0.145725	0.342267	P43406	Itgav
TRINITY_DN107087_c0_g1	2.20714	1.83903	-0.935509	-1.22581	#N/A	Q63880	Ces3a Es31
TRINITY_DN10709_c0_g1	0.20307	1.79743	0.588415	0.266288	0.600662	Q91X17	Umod
TRINITY_DN107092_c0_g1	1.75888	1.38122	0.431737	0.367249	0.049688	O35405	Pld3 Sam9
TRINITY_DN107138_c0_g1	-2.53618	-0.682312	-1.25044	-0.874919	0.663145	Q60997	Dmbt1 Crpd
TRINITY_DN10714_c0_g1	-0.473122	2.83932	0.280015	1.37034	0.0932424	P62080	Tspan5 Tm4sf9
TRINITY_DN1072_c0_g1	-0.00715049	0.477394	0.143264	-0.114958	0.747755	Q8BLX4	Slc35c1 Fuct1
TRINITY_DN10720_c0_g1	-0.132682	-0.629406	-0.430847	-0.576471	0.246454	Q8BUV8	Gpr107 Kiaa1624
TRINITY_DN10725_c0_g1	-2.15978	-2.13443	-1.88764	-1.85191	0.019621	Q6ZQA0	Nbeal2 Kiaa0540
TRINITY_DN10732_c0_g1	1.69883	0.548132	0.220299	0.820304	0.341303	Q8BKW4	Zcchc4
TRINITY_DN10733_c0_g1	-4.59972	-4.40455	-1.37107	4.98062	0.266179	O89094	Casp14
TRINITY_DN10733_c0_g3	2.55094	8.74595	2.06945	-0.852504	0.374651	P29594	Casp2 Ich1 Nedd-2 Nedd2
TRINITY_DN10734_c0_g1	9.25642	4.81742	1.13544	6.41502	0.000805834	P58391	Kcnn3 Sk3
TRINITY_DN10735_c0_g1	-2.11816	-0.00965403	-1.55431	-1.68827	0.0084504	Q60989	Xiap Aipa Api3 Birc4 Miha
TRINITY_DN10738_c0_g1	0.159457	-1.4486	-0.664229	-1.24159	#N/A	Q99PV0	Prpf8 Prp8
TRINITY_DN10742_c0_g1	-0.156902	0.264043	0.300918	-0.084495	0.697479	Q8BNQ3	Gpr137b Tm7sf1
TRINITY_DN10744_c0_g1	0.370565	-0.141393	-0.0520612	0.0285538	0.89323	P56135	Atp5mf Atp5j2
TRINITY_DN107447_c0_g1	3.66055	1.68843	1.75731	3.84792	#N/A	Q9JKD8	Tbx21 Tbet Tblym
TRINITY_DN10746_c0_g1	-2.23419	-3.11469	-0.745357	-1.22739	0.480727	O35474	Edil3 Del1
TRINITY_DN10746_c0_g2	-3.11516	-1.91176	-0.187373	-2.46313	0.104054	Q9Z1L4	Rs1 Rs1h Xlrs1
TRINITY_DN107461_c0_g1	-5.56944	-5.37428	-4.40242	3.22772	0.373035	P63017	Hspa8 Hsc70 Hsc73
TRINITY_DN10747_c0_g1	0.857489	0.500816	0.398633	0.931758	0.353364	Q922E4	Pcyt2
TRINITY_DN10749_c0_g1	2.60302	2.07611	1.74196	1.69164	8.54956e-05	Q8R4R6	Nup35 Mp44 Nup53
TRINITY_DN1075_c0_g1	-1.91729	-0.538576	-0.357485	-0.679573	0.0242533	E9Q555	Rnf213 Mystr
TRINITY_DN1075_c1_g1	-1.67155	-0.0355654	0.198278	-0.401538	0.0178082	E9Q555	Rnf213 Mystr
TRINITY_DN10753_c0_g1	-2.51453	-1.35757	-0.799445	-1.01268	0.408963	Q8K078	Slco4a1 Oatp4a1 Oatpe Slc21a12
TRINITY_DN10754_c0_g1	2.13072	1.68364	1.90534	2.32081	0.0234276	P48964	Cdc25a Cdc25m3
TRINITY_DN10755_c0_g1	1.76471	1.29677	1.21903	1.32893	0.0648716	Q8R2Q4	Gfm2 Efg2
TRINITY_DN10756_c0_g1	-8.39251	-3.75424	-0.621409	-9.66347	0.000776755	Q91YH5	Atl3
TRINITY_DN10756_c0_g3	-6.03697	-0.48221	-1.16047	-5.84642	0.7916	Q8BH66	Atl1 Spg3a
TRINITY_DN10757_c0_g2	-2.61165	-2.74785	-1.36726	-1.12906	1.8431e-07	Q8BGE9	Rxfp3 Rln3r1 Salpr
TRINITY_DN1076_c0_g1	1.93038	1.27526	1.18319	0.960264	4.67713e-08	P58771	Tpm1 Tpm-1 Tpma
TRINITY_DN1076_c0_g2	2.15663	1.51386	1.32097	1.19141	5.28783e-06	Q8CCS6	Pabpn1 Pab2 Pabp2
TRINITY_DN10761_c0_g1	-0.522729	-0.282532	-0.951129	-1.26922	0.828954	Q62433	Ndrg1 Ndr1 Ndrl Tdd5
TRINITY_DN10763_c0_g1	0.438454	0.713725	1.36186	0.925519	3.91394e-06	Q8R0N6	Adhfe1
TRINITY_DN1077_c0_g1	-1.19045	0.700928	0.403751	-0.44239	0.0471429	Q60989	Xiap Aipa Api3 Birc4 Miha
TRINITY_DN10772_c0_g1	-2.82268	-2.4369	-1.4048	-0.79981	0.0259402	Q7TNF8	Tspoap1 Bzrap1 Kiaa0612 Rbp1
TRINITY_DN10775_c0_g1	0.284442	-0.00150825	-0.0291331	0.158892	0.934539	Q9DB25	Alg5
TRINITY_DN10777_c0_g1	-8.67348	-6.41585	-2.30478	-3.97868	0.000433939	Q11011	Npepps Psa
TRINITY_DN10785_c0_g1	-5.61653	-1.54377	-0.663607	0.231045	0.000382572	O35544	Slc1a6 Eaat4
TRINITY_DN10791_c0_g1	0.649513	0.840758	0.973491	1.01443	0.772654	P15620	Znf271 Zfp-35 Zfp35
TRINITY_DN10792_c0_g1	-1.2552	0.380689	0.569425	0.87529	0.266811	P47743	Grm8 Gprc1h Mglur8
TRINITY_DN10795_c0_g1	-1.0036	-0.57017	-0.60728	-0.693438	0.0220674	Q99JY4	Trabd
TRINITY_DN10797_c0_g1	-4.66275	-0.0544118	0.282928	0.69925	0.0170322	P35419	Tpo
TRINITY_DN10798_c0_g1	-0.02751	0.0404579	0.116356	0.148779	0.989109	Q8C0V9	Frmd6
TRINITY_DN108_c0_g1	0.420793	0.367747	-0.473818	-0.466838	0.24755	Q9CXY9	Pigk
TRINITY_DN1080_c0_g1	-0.600801	0.117802	0.347725	0.414538	0.597367	Q9JJV9	Scn5a
TRINITY_DN10804_c0_g1	-1.68451	0.338212	0.395847	-0.396034	0.624316	E9Q555	Rnf213 Mystr
TRINITY_DN10806_c0_g1	0.541723	0.114122	-0.0177589	0.123479	0.519151	Q9CR86	Carhsp1
TRINITY_DN108072_c1_g1	-0.902424	-0.169884	0.286488	0.878603	0.482492	O88986	Gcat Kbl
TRINITY_DN108079_c0_g1	-1.36345	-2.11008	-1.24918	1.11612	#N/A	P39688	Fyn
TRINITY_DN10809_c0_g1	-0.902232	0.150747	0.0746813	0.0484265	0.644887	P48760	Fpgs
TRINITY_DN1081_c0_g1	-0.383762	-0.404028	-0.575957	-0.689408	0.575205	Q8BY87	Usp47
TRINITY_DN10812_c0_g1	0.0984294	-0.0722583	-0.12712	-0.000245159	0.978117	Q3UF64	Rnft2 Tmem118
TRINITY_DN10813_c0_g1	-5.14076	-4.16452	-2.47313	-2.45998	8.18304e-05	Q60847	Col12a1
TRINITY_DN10817_c0_g1	-0.563292	0.628225	-0.622968	-0.707579	0.0613771	Q9CXT6	Kdm8 Jmjd5
TRINITY_DN10831_c0_g1	-0.215379	-0.153432	-0.318875	-0.173164	0.953435	Q9DD18	Dtd1 Hars2
TRINITY_DN10831_c0_g2	1.02324	0.702984	0.520421	0.0988423	0.365477	Q9JJC9	Herpud2 MNCb-2040
TRINITY_DN10834_c0_g1	-4.97526	-1.09093	0.761236	-1.00854	#N/A	Q91XQ0	Dnah8 Dnahc8
TRINITY_DN10835_c0_g1	-0.27895	-0.119664	-0.0679138	-0.159814	0.952622	Q3UUQ7	Pgap1
TRINITY_DN10837_c0_g1	-7.25362	-0.678256	-2.47475	-1.33989	0.620729	Q6ZWY6	Ube2d2b
TRINITY_DN10837_c0_g2	-2.31975	0.157753	-0.626876	-2.75147	0.679119	P62838	Ube2d2 Ubc4 Ubch4 Ubch5b Ube2d2a
TRINITY_DN10839_c0_g1	1.00347	0.618379	0.630554	0.682295	0.121062	Q923G2	Polr2h
TRINITY_DN1084_c0_g1	-0.194021	0.157567	-0.104795	0.329878	0.576954	Q6A037	N4bp1 Kiaa0615
TRINITY_DN10845_c0_g1	-1.75531	-0.134158	-0.43834	-0.535653	0.226317	Q03137	Epha4 Sek Sek1
TRINITY_DN10847_c0_g1	2.05945	1.82131	1.93078	1.61849	0.000259325	Q8K157	Galm
TRINITY_DN10847_c0_g2	0.233335	0.120231	1.01521	0.844349	0.114219	Q8K157	Galm
TRINITY_DN10852_c0_g1	-0.445378	-1.96877	-1.18026	-0.927517	0.706213	Q8BZM0	Klhl12 C3ip1
TRINITY_DN10854_c0_g1	0.087736	0.469243	0.466167	0.515776	0.766088	Q11011	Npepps Psa
TRINITY_DN10856_c0_g1	0.0765538	0.985866	0.462079	1.38015	0.548393	Q91ZX1	Cd209a Cire
TRINITY_DN10857_c0_g1	0.627791	0.0146643	0.0265945	-0.041351	0.486975	P39749	Fen1 Fen-1
TRINITY_DN1086_c0_g1	1.29154	1.59921	1.95148	1.45008	0.00759553	Q9ET66	Pi16 Cripi
TRINITY_DN10861_c0_g1	-0.183681	-0.302387	-0.371314	-0.434862	0.427594	P28740	Kif2a Kif2 Kns2
TRINITY_DN10862_c0_g1	-0.774377	-0.679068	-1.64741	-2.43565	1.94598e-11	Q8R0M8	Slc16a4 Mct5
TRINITY_DN10863_c0_g1	0.317964	1.20702	1.33246	1.30947	0.627221	P31649	Slc6a13 Gabt2 Gabt3 Gat-3 Gat2 Gat3
TRINITY_DN10868_c0_g1	0.112667	0.120535	-0.00772773	-0.0654766	0.926119	Q60972	Rbbp4 Rbap48
TRINITY_DN10868_c0_g2	1.3347	0.744912	0.840972	1.22613	0.0143806	Q60972	Rbbp4 Rbap48
TRINITY_DN108680_c0_g1	-0.650722	-1.70884	0.201507	0.685032	0.858568	Q9D939	Sult1c2 Sult1c1
TRINITY_DN1087_c0_g1	1.64992	-1.59934	-0.137797	0.67826	0.0109036	Q9D5W4	Ccdc81
TRINITY_DN10870_c0_g1	-2.67766	-2.59006	-1.15798	-0.725642	0.143806	Q6PGN3	Dclk2 Dcamkl2
TRINITY_DN10873_c0_g1	1.2048	0.561214	0.274327	0.123921	0.215302	Q923K4	Gtpbp3
TRINITY_DN10876_c0_g1	-1.44	-0.853329	-0.183877	-0.531333	0.00207703	Q9CXT6	Kdm8 Jmjd5
TRINITY_DN10879_c0_g1	7.61424	3.38389	0.346522	5.25361	0.167364	Q8K4G1	Ltbp4
TRINITY_DN1088_c0_g1	-0.621288	0.363789	0.655598	1.17902	0.206793	Q2HXL6	Edem3
TRINITY_DN10880_c0_g1	-0.41474	-0.215473	-0.224569	-0.297314	0.774645	Q80U63	Mfn2 Kiaa0214 Marf
TRINITY_DN108806_c0_g1	-2.92761	-0.190319	0.181016	0.311934	0.622934	P21447	Abcb1a Abcb4 Mdr1a Mdr3 Pgy-3 Pgy3
TRINITY_DN10884_c0_g1	-4.39478	-3.62101	-1.29189	-1.84427	0.0872181	Q60928	Ggt1 Ggt Ggtp
TRINITY_DN10885_c0_g1	0.535932	-0.0722591	0.0985091	0.252508	0.929069	P26187	Mgmt
TRINITY_DN108862_c0_g1	-2.15356	-0.055552	-0.257386	-1.57021	#N/A	Q5DTZ0	Nynrin Kiaa1305
TRINITY_DN1089_c0_g1	-0.0304588	0.0564092	-0.105959	-0.172138	0.995658	Q9ERU9	Ranbp2
TRINITY_DN10890_c0_g1	-0.940132	-0.713655	-0.345103	0.338265	0.00335542	A2AJ88	Pnpla7
TRINITY_DN108906_c0_g1	-0.377663	-0.744113	-0.487013	-0.494436	0.857092	Q8C3L1	Ssuh2 Ssu2
TRINITY_DN10891_c0_g1	0.206682	-0.0969819	-0.0264638	0.109673	0.993478	Q9QZ03	Slc39a1 Zip1 Zirtl
TRINITY_DN10899_c0_g1	-4.11089	-3.91845	1.06833	2.85477	3.83668e-05	P20801	Tnnc2 Tncs
TRINITY_DN109_c0_g1	1.53773	1.47034	0.756843	0.799227	0.129929	Q9D752	Mad2l2 Mad2b Rev7
TRINITY_DN109_c0_g2	0.035913	0.00682165	0.0424189	0.0855458	0.999757	P60766	Cdc42
TRINITY_DN10906_c0_g1	-0.665046	-0.236741	-0.438959	0.0112047	0.43944	Q80XD1	Chn2 Arhgap3 Bch
TRINITY_DN10908_c0_g1	0.555994	-0.541403	-0.164343	-0.0364836	0.823848	Q3USW5	Foxred2 D15Bwg0759e
TRINITY_DN10909_c0_g1	-1.20369	-2.05707	-0.423355	-0.208179	0.283933	Q8K341	Atat1 Mec17
TRINITY_DN10910_c0_g1	-0.629468	-0.239726	-0.748895	-0.369308	0.21221	Q920I9	Wdr7 Kiaa0541 Trag
TRINITY_DN10912_c0_g1	-1.04947	-1.47128	0.27869	-1.09707	0.281501	Q8BIK6	Tmprss7
TRINITY_DN10913_c0_g1	-0.677583	0.211734	0.755646	0.367212	0.833229	Q61555	Fbn2 Fbn-2
TRINITY_DN1092_c0_g1	3.94867	3.17609	3.09306	2.72186	6.56945e-05	P33174	Kif4 Kif4a Kns4
TRINITY_DN10923_c0_g2	-1.15984	-1.16336	-1.44708	-1.44865	0.0209407	Q80T32	Adgrd1 Gpr133 Pgr25
TRINITY_DN10928_c0_g1	1.04587	-0.667279	-1.31942	-1.39855	0.143743	Q99P50	Ghsr
TRINITY_DN109293_c0_g1	-1.043	-0.84784	3.22683	6.10641	#N/A	P29594	Casp2 Ich1 Nedd-2 Nedd2
TRINITY_DN1093_c0_g1	-1.04552	0.284663	-0.156924	0.371994	0.222279	Q8K0C9	Gmds
TRINITY_DN10938_c0_g1	-0.303257	-1.1329	1.0964	0.796706	0.219363	A2APC3	Ttll9
TRINITY_DN1094_c0_g1	0.815782	1.541	1.1164	1.1869	0.00059162	Q91VP7	Tmem101
TRINITY_DN109416_c0_g1	-0.821302	-0.508972	-1.07435	-1.90888	0.965584	O08863	Birc3
TRINITY_DN10945_c0_g1	2.60264	1.96628	1.47433	1.60176	5.63381e-05	Q9CQ18	Rnaseh2c Ayp1
TRINITY_DN10949_c0_g1	-1.86578	-2.42441	-1.72287	-1.98216	0.0181935	O55226	Chad
TRINITY_DN1095_c0_g1	1.33208	1.24912	0.882527	0.802394	0.155871	Q9CQQ8	Lsm7
TRINITY_DN10952_c0_g1	-1.72816	-0.13213	0.42041	0.499858	0.00205601	Q9JLF6	Tgm1
TRINITY_DN10953_c0_g1	1.53801	-0.337953	1.05169	1.56255	0.254366	Q8CDT7	Cabcoco1
TRINITY_DN10956_c0_g1	3.28602	1.64982	1.78585	2.12554	4.23342e-05	Q9EQQ0	Suv39h2
TRINITY_DN10958_c0_g1	-2.05692	-1.72953	-0.460114	0.0665289	0.106133	Q9ES83	Bves Pop1 Popdc1
TRINITY_DN10959_c0_g1	-5.50878	-1.68776	-1.103	0.987815	0.534915	P63017	Hspa8 Hsc70 Hsc73
TRINITY_DN10960_c0_g1	0.933176	1.52194	0.474213	1.80528	0.983826	Q61554	Fbn1 Fbn-1
TRINITY_DN10961_c0_g1	-1.65582	0.10397	0.14332	-0.207554	0.120824	Q8BXB6	Slco2b1 Oatp2b1 Slc21a9
TRINITY_DN10962_c0_g1	0.151782	0.615848	0.825693	-4.46484	#N/A	P39688	Fyn
TRINITY_DN10965_c0_g1	1.05095	0.549819	1.05213	0.244003	0.817538	P08043	Zfp2 Fnp-2 Mkr2 Zfp-2
TRINITY_DN10969_c0_g1	0.263397	0.73659	0.0885401	0.0587331	0.443505	Q8C3X4	Guf1
TRINITY_DN10970_c0_g1	0.230009	0.662158	1.02668	0.22875	0.00123742	Q9D975	Srxn1 Npn3 Srx
TRINITY_DN10971_c0_g1	0.803837	0.363542	-0.106428	-0.630752	0.497162	Q0VAW7	Znf112 Zfp112
TRINITY_DN109710_c0_g1	-2.6639	-5.5073	-2.98333	-5.51192	#N/A	P20918	Plg
TRINITY_DN10972_c0_g1	0.0646053	0.201769	0.0792318	0.190776	0.983826	Q9Z265	Chek2 Chk2 Rad53
TRINITY_DN10973_c0_g1	-2.07245	-0.271539	0.0950434	0.778063	0.0848525	Q3V1N1	Mfhas1
TRINITY_DN10974_c0_g1	0.299608	-0.954785	-1.09543	-0.730344	0.176054	Q8R164	Bphl
TRINITY_DN10975_c0_g1	6.52183	5.60625	4.35054	4.77687	1.39849e-09	Q9WU63	Hebp2 Soul
TRINITY_DN10975_c0_g2	-0.817506	1.06535	1.58987	1.91222	0.471991	D4PHA7	Wscd2 Kiaa0789
TRINITY_DN10976_c0_g1	0.292595	-0.758348	-0.570335	-0.190527	0.787936	Q6NXK7	Dpp10
TRINITY_DN10978_c0_g1	-0.914548	-0.485333	-0.247642	-0.275482	0.738677	Q3UQI9	Mindy4 Fam188b
TRINITY_DN10979_c0_g1	-2.88328	-1.48642	0.231535	0.486921	0.126151	Q5SPV6	0
TRINITY_DN1098_c0_g3	0.764822	0.470981	0.557337	0.620152	0.568993	Q9CQQ7	Atp5pb Atp5f1
TRINITY_DN10980_c0_g1	-5.17546	-22.4941	-0.966502	-3.41635	0.647297	P63017	Hspa8 Hsc70 Hsc73
TRINITY_DN10982_c0_g2	0.1218	-0.498771	0.239687	1.04411	0.792902	Q9D665	Sdr42e1
TRINITY_DN10992_c0_g1	-0.0172986	3.06831	1.70807	1.72375	0.610872	Q923L3	Csmd1
TRINITY_DN10993_c0_g1	2.54139	1.81459	1.38667	1.08359	3.69188e-05	Q8R368	Dnaaf4 Dyx1c1 Ekn1
TRINITY_DN10999_c0_g1	-5.91059	-0.581679	-0.198821	0.589779	0.063421	P63260	Actg1 Actg
TRINITY_DN11_c0_g1	1.38029	0.955595	0.807046	0.978704	0.00248957	Q9CWJ9	Atic Purh
TRINITY_DN11_c1_g1	-1.3454	0.0971855	-0.465895	0.0259253	0.0659169	O70451	Slc16a7 Mct2
TRINITY_DN110_c0_g1	-0.100217	0.00926539	0.76243	0.543832	0.13665	P13020	Gsn Gsb
TRINITY_DN1100_c0_g1	-0.954681	-1.32001	-0.589347	-0.567617	0.331577	Q9QXL2	Kif21a Kiaa1708
TRINITY_DN11004_c0_g1	-0.248759	0.884558	1.09829	0.538434	0.79927	Q91X77	Cyp2c50
TRINITY_DN1101_c0_g1	-1.85482	0.369189	-0.70846	-1.42912	0.0223933	Q62210	Birc2
TRINITY_DN11012_c0_g1	-0.611388	1.11152	0.566583	-1.30244	0.424464	Q8R4B8	Nlrp3 Cias1 Mmig1 Nalp3 Pypaf1
TRINITY_DN11017_c0_g1	7.27374	6.69582	6.44285	7.31733	9.38445e-12	A2ASS6	Ttn
TRINITY_DN1102_c0_g1	-1.15997	-0.0548802	-0.75505	-0.815262	0.356077	Q04592	Pcsk5
TRINITY_DN11020_c0_g1	0.625494	0.345815	2.01608	1.55061	0.261972	Q710D3	Unc93a
TRINITY_DN11026_c0_g1	-2.13571	0.303074	-0.2982	-0.280297	0.0644156	Q80Z71	Tnn Tnw
TRINITY_DN11028_c0_g1	-5.04564	-3.20544	-2.63901	-2.06251	0.000478631	Q61739	Itga6
TRINITY_DN110283_c0_g1	-2.32185	0.19325	2.11551	0.757373	#N/A	Q2TPA8	Hsdl2
TRINITY_DN1103_c0_g1	-0.3434	-0.204534	-0.231982	-0.30034	0.795866	P62257	Ube2h
TRINITY_DN11036_c0_g1	-0.811494	-0.858434	3.18458	1.87581	0.0984648	Q6PA06	Atl2 Arl6ip2
TRINITY_DN11038_c0_g1	-1.50975	-0.190905	2.27851	1.38685	0.238726	Q9JI18	Lrp1b Lrpdit
TRINITY_DN1104_c0_g1	0.547417	0.196136	-0.139627	0.403298	0.791916	Q9D2V5	Aar2
TRINITY_DN11040_c0_g1	0.0735488	-0.444628	-0.561116	-0.176337	0.105482	Q80TN5	Zdhhc17 Hip14 Kiaa0946
TRINITY_DN11042_c0_g1	-0.216514	-0.113995	0.327297	0.070125	0.833229	Q7TQA3	Sdr16c5 Rdhe2 Scdr9
TRINITY_DN11049_c0_g1	0.542422	0.269959	0.192107	-0.311799	0.550496	Q9D0F1	Ndc80 Hec1 Kntc2
TRINITY_DN1105_c22_g1	-0.0732887	-0.688668	0.713157	-0.99098	0.839513	Q8VCK5	Klhl20 Kiaa4210 Kleip
TRINITY_DN11054_c0_g1	1.23087	0.591379	0.409435	0.641093	0.154161	O35678	Mgll
TRINITY_DN11055_c0_g1	0.589915	1.08474	0.288749	-0.0631882	0.0773698	Q8BGT1	Flrt3 Kiaa1469
TRINITY_DN11056_c0_g1	1.62875	0.21163	-0.231957	0.179705	9.10439e-06	Q9D9N8	Pradc1 Pap21
TRINITY_DN11058_c0_g1	0.22446	0.478004	1.85524	1.37505	4.75878e-06	Q8CBH5	Mfsd6 Mmr2
TRINITY_DN1106_c0_g1	-0.946004	-0.541021	-0.594403	-0.576509	0.253413	Q8VHY0	Cspg4 An2 Kiaa4232 Ng2
TRINITY_DN11061_c0_g1	-1.69135	0.148613	1.23981	-0.295726	0.196104	Q8BZH0	Slc39a13 Zip13
TRINITY_DN11063_c0_g1	0.185588	0.523993	0.124487	0.384951	0.339298	Q91YR7	Prpf6
TRINITY_DN11066_c0_g1	-0.156566	-0.615383	-0.764094	-0.490077	0.360385	Q78YZ6	Scoc Scoco
TRINITY_DN11068_c0_g1	0.37583	-0.350075	-0.198355	0.0625689	0.658337	P05063	Aldoc Aldo3 Scrg2
TRINITY_DN1107_c0_g1	-1.54537	-0.918758	-1.57076	-1.85888	1.47877e-07	Q6NZM9	Hdac4
TRINITY_DN11074_c0_g1	-0.222916	-0.608751	-0.20814	-0.432037	0.827307	Q9QY53	Nphp1 Nph1
TRINITY_DN11077_c0_g1	-0.858939	-0.645319	-0.511446	-0.929152	0.540969	Q6PGL7	Washc2 D6Wsu116e Fam21 Kiaa0592
TRINITY_DN11078_c0_g1	0.868229	0.437119	0.137418	0.535924	0.330026	O35625	Axin1 Axin Fu
TRINITY_DN11079_c0_g1	-0.683302	-0.827058	-0.394611	-0.387062	0.634611	Q6P9S1	Atmin Kiaa0431
TRINITY_DN1108_c0_g1	-1.31893	-0.094354	0.0120638	0.00910102	0.0524889	P0C7T6	Atxn1l Boat
TRINITY_DN11083_c0_g1	-4.16343	-2.48943	-1.34982	-2.83157	0.00260074	P04117	Fabp4 Ap2
TRINITY_DN11083_c1_g1	1.98627	-0.61723	0.309899	1.34107	0.506378	P04117	Fabp4 Ap2
TRINITY_DN11085_c0_g1	2.11329	0.298895	1.05486	1.71628	0.0144712	Q4VAE3	Tmem65
TRINITY_DN11088_c0_g1	0.419668	0.289001	1.02673	0.129975	0.74781	P40240	Cd9
TRINITY_DN11089_c0_g1	0.156791	-0.414827	-0.456893	-0.84508	0.58082	Q91WC1	Pot1 Pot1a
TRINITY_DN1109_c0_g2	-0.93484	-0.667527	-0.971453	-0.407266	0.0119647	O70439	Stx7 Syn7
TRINITY_DN1109_c2_g1	-0.451031	-0.188626	-0.292223	-0.686856	0.619222	Q9Z1R2	Bag6 Bat3
TRINITY_DN1109_c2_g2	-0.0481275	-0.785359	-5.00905	0.313595	#N/A	Q9Z1R2	Bag6 Bat3
TRINITY_DN11094_c0_g1	-0.322568	-0.536559	-0.531033	-0.399838	0.349609	Q8R059	Gale
TRINITY_DN11096_c0_g1	-1.49744	-0.724136	0.363119	0.0216216	0.545299	A2AL36	Cntrl Cep1 Cep110
TRINITY_DN11097_c0_g1	-0.337579	0.163971	-1.16944	-0.87466	0.805207	P97435	Tmprss15 Entk Prss7
TRINITY_DN110974_c0_g1	1.58461	0.59378	0.582017	1.13572	0.826611	E9QAG8	Znf431 Zfp431 Zfp932
TRINITY_DN11098_c0_g2	0.0881605	0.122046	0.351706	0.113911	0.986343	Q9EQY0	Ern1 Ire1
TRINITY_DN111_c0_g1	-0.225389	-0.831575	-0.650295	-0.98919	0.20065	Q61144	Psen2 Ad4h Alg3 Ps-2 Psnl2
TRINITY_DN1110_c0_g1	-1.0777	-0.922361	-0.446151	-1.19769	0.173578	Q9DAZ9	Zfyve19 Anchr
TRINITY_DN111005_c0_g1	0.967153	-0.101336	-0.250019	-0.513682	0.105496	Q3LAC4	Prex2 Depdc2
TRINITY_DN11101_c0_g1	-4.97061	-2.94047	-3.21615	-2.41888	0.0371515	P35546	Ret
TRINITY_DN11103_c0_g1	-2.20787	-0.771987	-2.43017	-1.69116	0.122935	Q8R550	Sh3kbp1 Ruk Seta
TRINITY_DN11104_c0_g1	-2.94234	-0.0974156	0.997892	0.549437	0.421006	Q9Z2E3	Ern2 Ire2
TRINITY_DN11107_c0_g2	0.889267	-0.662354	-0.875409	0.070484	0.0682528	Q9D518	Fam227b
TRINITY_DN11108_c0_g1	2.48662	2.35958	-3.30616	1.28505	0.080254	Q0VAW7	Znf112 Zfp112
TRINITY_DN1111_c0_g1	-0.621818	-0.34593	-0.282999	-0.745071	0.831624	O70325	Gpx4
TRINITY_DN11110_c1_g2	0.945567	1.01983	1.56048	1.16124	0.97215	Q8BUL5	Klhl7
TRINITY_DN11111_c0_g2	1.26393	0.280606	0.368144	0.233615	0.429636	Q8CIL4	0
TRINITY_DN11114_c0_g1	0.0990327	1.1504	0.181569	1.28879	0.720912	Q9DBW0	Cyp4v2 Cyp4v3
TRINITY_DN11115_c0_g1	-3.28878	-2.67383	-2.04183	-1.40047	0.0385335	A2RT91	Ankar
TRINITY_DN111182_c0_g1	1.62236	0.53442	1.0829	1.39582	0.840561	O35453	Hpn
TRINITY_DN11119_c0_g1	2.36316	0.659875	1.20523	1.46824	0.10091	P50171	Hsd17b8 H2-Ke6 Hke6
TRINITY_DN11121_c0_g1	1.21031	0.685247	0.650851	0.949315	0.0715237	Q8BJW6	Eif2a D3Ertd194e
TRINITY_DN11122_c0_g1	-0.343268	-0.262686	-0.115304	-0.107997	0.945383	Q6P5E4	Uggt1 Gt Ugcgl1 Uggt Ugt1 Ugtr
TRINITY_DN11123_c0_g1	0.724161	-0.254651	-0.0445895	0.719167	0.465381	Q9Z2L6	Minpp1 Mipp MNCb-1572
TRINITY_DN11125_c0_g2	-1.04369	-1.50461	-1.25659	-0.578095	0.242847	Q8BLA8	Trpa1 Anktm1
TRINITY_DN11126_c0_g1	-1.26122	2.13978	1.96284	1.92411	0.000785702	O08545	Efna3 Epl3 Eplg3 Lerk3
TRINITY_DN11128_c0_g1	4.9372	-1.74946	7.81643	-1.75407	9.11544e-21	P63017	Hspa8 Hsc70 Hsc73
TRINITY_DN11128_c1_g1	-1.75024	-4.91078	-0.298149	-4.9154	#N/A	P63017	Hspa8 Hsc70 Hsc73
TRINITY_DN11129_c0_g1	0.576959	0.394722	0.124422	0.197592	0.209947	Q924H7	Wac Kiaa1844
TRINITY_DN11129_c2_g1	0.163761	-0.191287	-0.3811	-0.241774	0.682388	Q9WVD5	Slc25a15 Ornt1
TRINITY_DN11130_c0_g1	0.773229	0.215025	-0.219954	-0.00283804	0.635508	Q91WD1	Polr3d Bn51t
TRINITY_DN11132_c0_g2	0.515583	0.55095	0.802116	-0.0552601	0.152343	P97500	Myt1l Kiaa1106 Nzf1 Png1
TRINITY_DN111361_c0_g1	-1.93552	-0.333902	-0.314973	-0.0349435	0.023261	Q9Z0V2	Kcnd2 Kiaa1044 MNCb-7013
TRINITY_DN11139_c0_g1	-1.24234	-0.718295	-0.114264	-0.114828	0.079248	A2CI98	Dytn Gm215
TRINITY_DN1114_c0_g1	-0.288643	-0.148302	-0.122418	-0.357876	0.861122	Q91VU1	Yipf1
TRINITY_DN11141_c0_g1	1.20239	-0.188779	0.104597	0.769855	0.451922	Q9QXA1	Cyhr1 Chrp Kiaa0496
TRINITY_DN11142_c0_g1	0.759184	0.781276	1.10197	0.807012	0.63557	Q61187	Tsg101
TRINITY_DN11146_c0_g1	4.50665	4.80148	3.12317	4.14649	0.443762	Q9D5N8	Satl1
TRINITY_DN11147_c0_g1	0.802608	0.151683	0.339891	0.287251	0.475799	Q9CZR8	Tsfm
TRINITY_DN111489_c0_g1	-0.905157	1.1763	0.355161	1.58158	0.570939	Q8BZM0	Klhl12 C3ip1
TRINITY_DN1115_c1_g1	-0.111682	0.539364	0.297572	0.151926	0.658742	Q8R003	Mbnl3 Chcr Mbxl
TRINITY_DN111502_c0_g1	2.1653	0.497801	0.671799	1.26084	0.0678787	Q9JI67	B3galt5 B3gt5
TRINITY_DN11151_c0_g1	-3.17735	-0.294432	-0.282718	-1.39412	0.288049	Q8BZM0	Klhl12 C3ip1
TRINITY_DN11153_c0_g1	0.87017	1.57524	0.694614	-3.61315	0.266305	P49312	Hnrnpa1 Fli-2 Hnrpa1 Tis
TRINITY_DN11154_c0_g1	-2.11503	2.03086	-0.894577	-0.610884	0.0544451	D3YXG0	Hmcn1
TRINITY_DN111544_c0_g3	-1.5231	-0.154847	-4.18521	-1.2239	#N/A	Q03963	Eif2ak2 Pkr Prkr Tik
TRINITY_DN11159_c0_g1	-1.60652	-1.38835	-0.947931	-0.961734	0.0468785	P11881	Itpr1 Insp3r Pcd6 Pcp1
TRINITY_DN1116_c0_g1	-0.504658	-1.66594	-1.29707	-1.21596	0.0215097	Q56A08	Gpkow
TRINITY_DN11161_c0_g2	1.52037	2.15776	1.45267	2.4113	0.039483	Q8BJ64	Chdh
TRINITY_DN11162_c0_g1	0.515863	0.185709	0.246813	0.419535	0.762348	Q9QY81	Nup210 Kiaa0906
TRINITY_DN11163_c0_g1	-0.237579	-0.619674	-0.56958	-0.559889	0.362204	Q9D1G5	Lrrc57
TRINITY_DN11165_c0_g2	-9.92525	-4.85582	-11.0252	-11.1657	0.0926912	Q91WQ3	Yars1 Yars
TRINITY_DN11165_c1_g1	-1.04304	-0.847872	4.37213	8.32006	0.383973	Q91WQ3	Yars1 Yars
TRINITY_DN11167_c0_g1	0.83395	-0.0617	0.500989	0.492015	0.63557	P62774	Mtpn Gcdp
TRINITY_DN11168_c0_g1	1.33122	0.318834	0.347766	0.309679	0.0379536	Q9JJF3	Riox1 Mapjd No66 MNCb-7109
TRINITY_DN1117_c0_g1	-1.14229	-1.00069	-0.36298	-0.158738	0.686643	Q6PEM8	Slc46a1 D11Ertd18e Hcp1 Pcft
TRINITY_DN11170_c0_g1	-1.84054	-1.19132	0.18869	0.476738	0.00177568	B1AWN6	Scn2a Scn2a1
TRINITY_DN11171_c0_g1	-2.051	-0.572888	0.00988144	-0.477794	0.244404	P0CG49	Ubb
TRINITY_DN11172_c0_g1	-0.551726	1.19896	1.61989	0.776818	0.0304681	Q9QXA6	Slc7a9 Bat1
TRINITY_DN1118_c0_g1	0.104064	0.512767	0.324611	0.0697705	0.298194	Q4VGL6	Rc3h1 Gm551 Kiaa2025
TRINITY_DN11180_c0_g1	-1.09	-0.322503	-0.440584	-0.0928243	0.951355	P27641	Xrcc5 G22p2
TRINITY_DN11187_c0_g1	1.26644	1.16573	-0.975222	-2.18198	0.0336728	Q61361	Bcan
TRINITY_DN11188_c0_g1	-1.45725	-1.26626	-0.612422	0.0443978	0.0629195	B9EHT4	Clip3 Clipr59
TRINITY_DN11189_c0_g1	0.0302976	0.197257	-0.666549	-0.659851	0.450545	P0C605	Prkg1 Prkg1b Prkgr1a Prkgr1b
TRINITY_DN1119_c0_g1	1.33373	0.968591	0.640216	0.410473	0.000830997	Q68FH4	Galk2
TRINITY_DN11191_c0_g1	1.00138	-0.686744	-0.467948	-0.680965	6.35197e-08	Q922Q8	Lrrc59
TRINITY_DN11194_c0_g1	-0.0283211	-0.353358	-0.429538	-0.102462	0.785115	E9Q9D5	Rabl2 Rabl2a
TRINITY_DN111993_c0_g1	4.92959	2.83757	2.03336	3.30158	#N/A	Q6R6I7	Rxfp1 Gm1018 Lgr7
TRINITY_DN112_c0_g1	0.209203	0.366643	0.726488	0.42603	0.146993	C0HKD9	Mfap1b
TRINITY_DN112_c0_g2	-0.523841	0.305219	0.740977	0.580171	0.0322246	P55050	Fabp2 Fabpi
TRINITY_DN1120_c0_g1	0.0433392	-0.117039	-0.0111459	0.297553	0.823657	Q4G5Y1	Klhdc2
TRINITY_DN11204_c0_g1	0.880629	0.594061	-0.0603221	0.281541	0.945505	Q8BKN6	Hs3st3a1 3ost3a1 Hs3st3a
TRINITY_DN11206_c0_g1	-1.06766	-0.866816	-1.54162	-1.05477	0.235177	B2RXS4	Plxnb2
TRINITY_DN11210_c0_g2	0.179414	0.481317	0.859151	0.711785	0.169732	Q8BGB8	Coq4
TRINITY_DN11213_c0_g1	-1.08966	-0.830039	-1.03608	-1.07019	0.171717	Q3U5F4	Yrdc Irip
TRINITY_DN11214_c0_g1	1.17613	1.01186	0.577504	1.28308	0.174307	Q9D5I4	Tctex1d1
TRINITY_DN112145_c0_g1	-0.133056	2.26789	1.39236	-0.70241	#N/A	E9Q4F2	Klhl18
TRINITY_DN11216_c0_g1	-4.09257	3.28638	1.17179	0.478724	1.41379e-06	Q9JLR5	Tcf23 Out
TRINITY_DN1122_c0_g1	-1.54203	-0.658253	0.305807	0.65333	0.445926	Q99P47	Cntnap4 Caspr4
TRINITY_DN11222_c0_g1	-2.93408	0.653142	0.0025502	-0.336509	0.0574022	Q9ER42	Barx1
TRINITY_DN11223_c0_g1	1.87081	2.21082	0.961108	0.792817	0.378762	Q9D6X5	Slc52a3 Rft2 RFVT3
TRINITY_DN11225_c0_g1	3.98309	3.1271	2.22271	3.31812	0.00051855	P15620	Znf271 Zfp-35 Zfp35
TRINITY_DN11225_c0_g2	0.00185527	1.57813	0.784513	1.9267	0.741915	Q8BQC8	Rbak Znf769
TRINITY_DN1123_c0_g2	-0.470716	-0.937312	-0.83034	-0.942773	0.0240978	P60521	Gabarapl2
TRINITY_DN11232_c0_g1	1.53418	-0.749682	0.715753	1.22371	0.0562244	Q810A5	Kiaa0895l
TRINITY_DN11233_c0_g1	-0.297032	-0.752771	-1.21708	-1.15436	0.316661	Q504N0	Cpa2
TRINITY_DN11237_c0_g1	-0.124032	0.04549	0.0493693	0.261883	0.995622	P58873	Rhbdl3 Rhbdl4 Vrho
TRINITY_DN11238_c0_g1	1.26479	0.984988	1.46246	1.43302	0.0853243	P50171	Hsd17b8 H2-Ke6 Hke6
TRINITY_DN1124_c0_g1	0.490762	0.276802	1.42459	1.09887	0.0366329	Q640L5	Ccdc18
TRINITY_DN11243_c0_g1	7.47903	4.56803	3.92736	5.4625	0.000150261	Q7TNK1	Rfx4
TRINITY_DN11245_c0_g1	1.22946	1.47771	1.59658	0.621704	0.678206	Q8VBX4	Cd207 Clec4k
TRINITY_DN11246_c0_g1	0.848406	0.120097	-0.100052	0.28396	0.229316	Q7TPD0	Ints3
TRINITY_DN11248_c0_g1	-0.0331357	2.54785	-0.697982	1.582	0.293642	Q11127	Fut4 Elft
TRINITY_DN11250_c0_g1	-3.1275	-1.39571	-2.97081	-2.73959	0.190536	Q9R1X5	Abcc5 Abcc5a Mrp5
TRINITY_DN11251_c0_g1	-3.77626	-2.17583	-1.59311	-2.35797	0.0165477	O08863	Birc3
TRINITY_DN11254_c0_g1	-0.957307	-0.647431	-0.232209	-0.0570167	0.206163	Q9Z1N9	Unc13b Unc13a
TRINITY_DN11256_c0_g1	0.276759	0.117469	-0.045001	-0.0154298	0.80333	Q8C561	Lmbrd2
TRINITY_DN11258_c0_g1	-0.473893	0.13255	-0.18152	-0.142717	0.890327	Q9CPV7	Zdhhc6
TRINITY_DN1126_c0_g1	0.566594	0.200633	0.254755	0.384536	0.270499	Q6P2B1	Tnpo3
TRINITY_DN112616_c0_g1	3.95091	5.96742	0.235423	-0.852419	#N/A	P05208	Cela2a Ela-2 Ela2 Ela2a
TRINITY_DN11263_c0_g2	-0.458227	0.798925	-2.50387	0.85133	0.316807	Q91YH5	Atl3
TRINITY_DN11263_c0_g3	-5.00341	-2.58734	-1.51614	-2.65064	0.80814	Q8BH66	Atl1 Spg3a
TRINITY_DN11264_c0_g1	2.14681	2.42506	3.49781	4.70398	0.159819	Q6TDP3	Klhl17
TRINITY_DN112652_c0_g2	-2.48027	-1.79712	-2.77046	-2.26912	0.601011	Q9CUX1	Thap12 Prkrir Thap0
TRINITY_DN11268_c0_g1	-1.20466	-0.71943	-1.25814	-1.47316	0.00335061	Q9DBT5	Ampd2
TRINITY_DN112702_c0_g2	8.56442	5.07679	3.35541	5.92684	4.77921e-05	Q9D5T7	Hormad1 Nohma
TRINITY_DN11271_c0_g1	-1.83806	-1.28214	-0.678066	-0.475344	0.126491	Q80ST9	Lca5
TRINITY_DN11272_c0_g1	-3.63381	-0.786963	-0.0351472	0.0160855	0.000909363	O88898	Tp63 P63 P73l Tp73l Trp63
TRINITY_DN11277_c0_g1	0.404602	0.171588	-0.769227	0.534231	0.842813	Q8R526	Pkd1l1 Rks
TRINITY_DN11279_c0_g1	1.25371	0.698038	0.843676	0.125624	0.213443	Q9Z1N9	Unc13b Unc13a
TRINITY_DN1128_c0_g1	-1.31148	0.216353	0.241876	-0.286386	0.0867968	Q80W68	Kirrel1 Kirrel Neph1
TRINITY_DN11280_c0_g1	0.349822	0.65458	-0.881617	-0.546254	0.00276497	P47877	Igfbp2 Igfbp-2
TRINITY_DN11281_c0_g1	-0.980489	-0.391565	-0.582134	-0.708327	0.0431287	Q99K90	Tab2 Kiaa0733 Map3k7ip2
TRINITY_DN11282_c0_g1	-2.26985	-0.3726	-0.389042	-0.638925	0.107203	Q2EMV9	Parp14 Kiaa1268
TRINITY_DN11283_c0_g1	0.237969	-0.383761	-0.647554	-0.86325	0.0332898	Q9Z1K6	Arih2 Ari2 Triad1 Uip48
TRINITY_DN11284_c0_g1	-0.25011	0.034835	0.397771	0.0381687	0.783517	P63046	Sult4a1 Sultx3
TRINITY_DN11285_c0_g1	0.369079	0.480231	0.291875	0.158407	0.98249	Q99NH7	Slc26a5 Pres
TRINITY_DN11286_c0_g1	-0.617504	-0.321382	-0.193276	-0.364519	0.85747	Q9CWP6	Mospd2
TRINITY_DN1129_c0_g1	0.330915	0.345169	0.395632	0.34438	0.738031	P68373	Tuba1c Tuba6
TRINITY_DN11294_c0_g1	0.7665	0.227689	0.0221783	0.0364029	0.652982	P08043	Zfp2 Fnp-2 Mkr2 Zfp-2
TRINITY_DN11299_c0_g1	0.89525	-0.165766	0.140531	0.312771	0.188846	Q9Z0M5	Lipa Lip1
TRINITY_DN113_c0_g1	-3.02539	-3.7612	-1.23386	-3.26077	1.49658e-05	P51942	Matn1 Cmp Crtm
TRINITY_DN113_c1_g1	-2.48169	-3.0575	-0.725017	-2.57777	0.0718664	P51942	Matn1 Cmp Crtm
TRINITY_DN1130_c0_g1	-1.2053	0.719707	0.334086	0.15241	0.00962816	Q02591	Gsc
TRINITY_DN11300_c0_g1	1.33427	-0.0758937	-0.308839	0.452948	0.404547	Q3UA06	Trip13 Pch2
TRINITY_DN11301_c0_g1	0.948046	0.0198774	-0.178043	0.122074	0.0836594	Q3THG9	Aarsd1 Alax
TRINITY_DN11302_c0_g1	-0.803676	-0.189761	-0.217981	-0.183731	0.928579	P59438	Hps5 Ru2
TRINITY_DN11303_c0_g1	-0.798845	1.07226	0.654425	1.43166	0.396838	Q9EQD0	Fzd5
TRINITY_DN11304_c0_g1	-0.207896	0.108387	-0.0201258	0.220579	0.926119	P12815	Pdcd6 Alg2
TRINITY_DN11304_c0_g2	-0.831872	-0.677504	-0.550689	1.19125	0.531192	P12815	Pdcd6 Alg2
TRINITY_DN11306_c0_g1	-0.18516	0.6859	-1.51052	-0.771872	0.151646	Q60847	Col12a1
TRINITY_DN11308_c0_g1	3.2347	2.68236	2.40314	3.30661	0.186471	Q7TSU7	Kirrel2 Neph3
TRINITY_DN1131_c0_g2	2.61625	1.75518	2.89044	1.56078	1.69475e-07	P0CC03	Sult6b1
TRINITY_DN11311_c0_g1	-0.400222	-0.261655	-0.318978	0.753545	0.769286	P11369	Pol Gm17492
TRINITY_DN11311_c0_g2	-3.74881	-2.50111	-1.41251	-0.498942	0.049218	P23578	Acr
TRINITY_DN11315_c0_g1	1.13122	0.28221	0.239218	0.473525	0.142851	Q9DCW4	Etfb
TRINITY_DN1132_c0_g1	1.23185	0.606227	0.598481	0.602658	0.072295	P56480	Atp5f1b Atp5b
TRINITY_DN11320_c1_g1	-0.0423448	0.018571	0.272949	0.206566	0.983846	Q8CB77	Eloa Tceb3
TRINITY_DN11323_c0_g1	10.8439	8.19789	6.0706	7.80464	1.1688e-10	P70281	Sycp3 Scp3
TRINITY_DN11328_c0_g1	0.472763	-0.530299	0.269461	-0.211288	0.668114	P0C872	Jmjd7
TRINITY_DN1133_c0_g1	0.11828	0.326726	0.264613	0.013222	0.932744	Q504N2	Slc22a15
TRINITY_DN11331_c0_g1	-2.0411	-1.06908	1.39754	0.654952	0.294801	Q8CH36	Slc36a4 Pat4
TRINITY_DN11332_c0_g1	4.64516	4.97038	5.62312	4.93946	0.00076959	Q9D7N9	Apmap
TRINITY_DN113335_c0_g1	-6.89818	-0.516526	-1.48043	-0.884947	0.584095	Q8C015	Pak5 Pak7
TRINITY_DN11334_c0_g1	-1.24729	-0.293967	-1.14996	-0.700629	0.399132	P58659	Eva1c Fam176c
TRINITY_DN11339_c0_g1	-0.0720747	0.320579	-0.75898	-0.886022	0.30199	Q3URQ0	Tex10
TRINITY_DN11350_c0_g1	-0.54648	-1.37188	-0.645629	0.314842	0.667232	Q3UXZ6	Fam81a
TRINITY_DN11355_c0_g2	1.07974	0.843359	0.562722	0.317814	0.256184	Q8K0H5	Taf10 Taf2h Tafii30
TRINITY_DN11356_c0_g1	-1.56725	-0.72052	-0.948673	-1.0487	0.830983	Q6R6I7	Rxfp1 Gm1018 Lgr7
TRINITY_DN11357_c0_g1	-0.775054	-1.00719	-1.16591	-1.04083	0.00316104	P98156	Vldlr
TRINITY_DN11359_c0_g1	-1.85842	-1.57252	-0.466154	-0.540728	0.652982	Q0II04	Nebl Lnebl
TRINITY_DN1136_c0_g1	2.4066	0.911967	1.30298	1.35021	0.00499728	Q3TNA1	Xylb
TRINITY_DN11361_c0_g2	0.356527	-0.3126	0.194412	-0.118769	0.825803	Q9D3N8	Grtp1 Tbc1d6
TRINITY_DN11365_c0_g1	-0.418897	0.706011	-0.186969	0.0694936	0.484558	A2A559	Pgap3 Perld1
TRINITY_DN11367_c0_g1	1.57224	0.805292	1.20128	1.17188	0.0598838	Q9JI99	Sgpp1 Spp1 Spph1
TRINITY_DN11369_c0_g1	-0.775134	-1.42553	-1.36942	-1.48007	0.292994	Q8BYI9	Tnr
TRINITY_DN1137_c0_g1	-0.207516	-0.115043	-0.0381222	-0.36365	0.881013	Q7TSC1	Prrc2a Bat2
TRINITY_DN11371_c0_g1	-0.473372	-1.46899	-0.124791	-1.00761	0.682833	Q9CX98	Cyp2u1
TRINITY_DN11375_c0_g1	-0.0871927	-0.632971	0.134483	-0.103461	0.876515	Q6R5N8	Tlr13
TRINITY_DN11378_c0_g1	-0.253182	-0.307787	-0.243635	0.265174	0.734696	Q5HZI9	Slc25a51 Mcart1
TRINITY_DN11379_c0_g1	1.12654	-0.171294	-0.102332	-0.195873	0.00897528	Q9DBE9	Ftsj3
TRINITY_DN1138_c0_g1	-0.51076	-0.379542	-0.285111	-0.292297	0.565959	O35643	Ap1b1 Adtb1
TRINITY_DN11381_c0_g1	0.396427	-1.54908	-0.632783	0.36468	0.471431	Q5K6N0	Tmem232 Tes13
TRINITY_DN11388_c0_g1	-1.6114	-1.71416	-1.38907	-1.7528	0.417565	Q80WQ9	Zbed4 Kiaa0637
TRINITY_DN113888_c0_g3	0.508785	-2.15392	-2.41299	-2.43931	#N/A	P70699	Gaa
TRINITY_DN1139_c0_g1	0.141425	-0.00747782	-0.333827	-0.232396	0.737153	Q8BHJ9	Slu7 D11Ertd730e
TRINITY_DN11391_c0_g1	0.0600697	0.451625	0.33702	0.575425	0.911998	P59280	Klhl8
TRINITY_DN11396_c0_g1	2.33557	0.997322	1.05116	1.01407	1.3395e-07	Q66K08	Cilp
TRINITY_DN113986_c0_g1	1.38254	1.7923	3.03087	1.62437	#N/A	Q8BRU6	Slc18a2 Vmat2
TRINITY_DN114_c0_g2	-0.353447	0.0664447	-0.0705271	0.00104382	0.914076	P61979	Hnrnpk Hnrpk
TRINITY_DN11401_c0_g1	0.80395	0.21907	0.788698	-1.96722	0.810213	Q9D9T8	Efhc1
TRINITY_DN11403_c0_g1	1.41589	1.69242	1.32024	1.37542	0.188755	Q8BUV6	Lsm11
TRINITY_DN11406_c0_g1	2.41121	1.74875	1.17712	-0.889243	0.363734	P80314	Cct2 Cctb
TRINITY_DN11408_c0_g2	-7.4579	-5.27272	-2.76936	-1.37698	0.00268743	Q8BNJ3	Nmnat2 Kiaa0479
TRINITY_DN1141_c0_g2	-3.99944	-3.62327	-2.48972	-1.1566	6.30664e-05	Q64343	Abcg1 Abc8 Wht1
TRINITY_DN11413_c0_g1	-2.86279	1.06662	1.39558	0.459893	0.00160931	Q8C110	Slitrk6 Sltk6
TRINITY_DN11415_c0_g1	-1.11699	-2.02933	-0.625673	-1.06929	0.162607	E9Q3S4	Map3k19 Ysk4
TRINITY_DN11416_c0_g1	-2.33486	0.389609	0.424687	2.12729	0.915074	Q9Z2E3	Ern2 Ire2
TRINITY_DN11419_c0_g1	7.65458	4.90083	4.02482	5.51075	1.55665e-09	Q7M6U3	Tex14
TRINITY_DN1142_c0_g1	-1.23106	-4.01014	-0.0265222	0.180752	0.0419949	Q3TYL0	Iqank1
TRINITY_DN11420_c0_g1	-1.59761	-0.535043	-0.991556	0.34183	0.83072	Q923L3	Csmd1
TRINITY_DN11420_c1_g1	-1.85647	-1.57053	-0.495637	2.58425	0.486927	P69525	Tmprss9
TRINITY_DN11423_c0_g1	-2.66188	-2.28489	-1.91885	-1.02585	1.88686e-05	Q6NXK7	Dpp10
TRINITY_DN11424_c0_g2	-0.22785	-0.0894602	-0.395218	-0.2464	0.859456	Q505D1	Ankrd28
TRINITY_DN11424_c0_g3	-2.24716	0.0370429	0.0202268	-0.0158525	6.2901e-14	P47750	Tshr
TRINITY_DN11426_c0_g1	-0.90306	-1.10125	-1.13965	-0.967715	0.514518	Q9CZD0	Mmachc
TRINITY_DN114279_c0_g1	-0.851843	-0.715061	0.862411	0.250944	#N/A	Q3UFB7	Ntrk1
TRINITY_DN1143_c0_g1	-0.341513	1.24373	0.209602	-0.198967	0.127189	Q9D1C2	Cby1 Cby Pgea1
TRINITY_DN11434_c0_g1	0.563263	0.0931863	0.48072	0.52089	0.971974	Q3UIR3	Dtx3l Bbap
TRINITY_DN11434_c1_g1	-0.441751	-0.305375	0.201257	-0.461472	0.878338	Q3UIR3	Dtx3l Bbap
TRINITY_DN11435_c0_g2	3.10713	-0.011649	-1.49913	0.0529735	3.55393e-08	Q5DTZ0	Nynrin Kiaa1305
TRINITY_DN11437_c0_g1	-2.18511	-3.92699	-5.47415	-3.79777	2.26831e-07	P47750	Tshr
TRINITY_DN1144_c0_g1	0.566786	-1.20463	0.192394	0.589937	0.570173	P11369	Pol Gm17492
TRINITY_DN11444_c0_g1	-1.79184	-1.403	-1.95469	-2.25052	5.71757e-05	Q80V70	Megf6 Egfl3
TRINITY_DN11445_c0_g1	1.43613	0.873652	1.50006	2.10104	0.298194	Q812F8	Mgat4b
TRINITY_DN11446_c0_g1	-1.81409	-1.58472	0.283946	-3.01902	#N/A	Q6PA06	Atl2 Arl6ip2
TRINITY_DN114491_c0_g1	3.27106	1.39011	0.778413	2.3364	0.00335061	Q64336	Tbr1
TRINITY_DN1145_c0_g1	-2.17638	-1.46701	-1.73606	-2.20638	1.59172e-06	O54990	Prom1 Prom Proml1
TRINITY_DN1145_c0_g2	-6.42757	-3.84843	-0.0978041	0.757348	8.35861e-08	O54990	Prom1 Prom Proml1
TRINITY_DN11450_c0_g1	0.312511	1.15433	0.237463	0.757197	0.558168	Q8BIR2	Aste1
TRINITY_DN11451_c0_g2	2.21605	1.04253	0.115422	1.4867	0.00525533	Q9EPX5	Fbxl12 Fbl12
TRINITY_DN11452_c0_g1	-1.15135	-0.890027	0.937929	0.15171	0.421006	P28825	Mep1a
TRINITY_DN11453_c0_g1	-4.71051	-0.000973787	1.84519	4.31318	0.0473437	Q6PA06	Atl2 Arl6ip2
TRINITY_DN1146_c0_g1	0.802848	-0.580571	-1.55201	-1.53036	0.0987017	Q9CXI3	Moxd1 Dbhr Mox
TRINITY_DN11461_c0_g1	-5.88266	-0.171128	-8.11027	-9.20508	0.426536	Q80Z71	Tnn Tnw
TRINITY_DN11462_c0_g1	-4.47968	1.45555	-1.27806	0.619617	#N/A	Q9QZ06	Tollip
TRINITY_DN11463_c0_g2	0.378772	0.301942	0.478717	0.19718	0.915074	P63271	Supt4h1a Spt4h Supt4a Supt4h
TRINITY_DN114681_c0_g1	0.312871	-0.00354172	-0.182266	0.10856	0.724194	Q6PD19	Armh3
TRINITY_DN11469_c0_g2	0.320824	0.316758	0.452814	0.102942	0.942834	Q8VC85	Lsm1
TRINITY_DN1147_c0_g1	-1.21307	-0.231094	-0.12622	0.0519244	0.0829638	Q9QXZ0	Macf1 Acf7 Aclp7 Macf
TRINITY_DN11479_c0_g1	0.560128	0.503125	0.225439	-0.0663641	0.581645	Q80YV3	Trrap
TRINITY_DN1148_c0_g1	0.14262	0.586979	0.647681	0.661735	0.338112	P31650	Slc6a11 Gabt3 Gabt4 Gat-4 Gat3 Gat4
TRINITY_DN11480_c0_g1	-1.97072	-0.303712	0.214347	0.778599	3.05305e-05	Q6PA06	Atl2 Arl6ip2
TRINITY_DN11480_c1_g1	0.899948	0.67884	1.19374	1.81568	0.332586	Q64520	Guk1 Gmk
TRINITY_DN11482_c0_g1	0.205497	0.0479372	-0.0402861	0.184891	0.95621	Q9JK24	Ppp2r3c G5pr MNCb-1932
TRINITY_DN11485_c0_g1	-0.588906	0.830105	2.13834	1.67144	0.0018221	Q99LB2	Dhrs4 D14Ucla2
TRINITY_DN11486_c0_g1	-1.06101	-0.549604	-1.55735	-3.07546	0.268537	P0DP28	Calm3 Cam3 Camc
TRINITY_DN114879_c0_g1	2.57275	1.23213	2.06472	0.223394	0.750411	O35403	Sult3a1 St3a1
TRINITY_DN11488_c1_g1	-2.6103	-0.315531	0.458701	2.18647	0.102477	Q9D805	Capn9 Ncl4
TRINITY_DN11488_c1_g2	-4.69228	-1.68673	0.368903	-0.132047	0.55591	Q9D805	Capn9 Ncl4
TRINITY_DN114897_c0_g1	-2.07327	-4.03466	-2.75201	-2.55426	0.0963817	O88199	Chst3 C6st Gst0
TRINITY_DN1149_c0_g1	-5.26661	0.692061	2.10179	1.98322	5.6036e-06	P51906	Slc1a1 Eaac1 Eaat3
TRINITY_DN11491_c0_g1	1.78854	0.797199	0.710047	1.0017	0.00225338	Q6PD31	Trak1
TRINITY_DN11494_c0_g1	1.69896	1.00326	1.01061	1.25007	0.128316	Q8BVH9	Mettl6
TRINITY_DN11498_c0_g1	-0.193089	-0.328067	-0.334304	-0.112665	0.890327	Q8BHL3	Tbc1d10b
TRINITY_DN11499_c0_g1	-0.806184	-0.0167536	0.134726	0.183337	0.624841	Q8BVA5	Ldah
TRINITY_DN115_c0_g1	-3.24955	-1.00188	-0.414294	-0.191227	0.160103	Q9ERD7	Tubb3
TRINITY_DN115_c0_g2	0.492267	0.297156	0.784224	0.769698	0.515178	P68372	Tubb4b Tubb2c
TRINITY_DN115_c0_g3	0.731805	-0.581286	-0.344682	-0.00924912	0.696388	P68372	Tubb4b Tubb2c
TRINITY_DN11503_c0_g1	-1.06106	1.2496	2.13213	0.672103	0.608009	Q80WQ9	Zbed4 Kiaa0637
TRINITY_DN11512_c0_g1	-1.3823	-1.12826	-1.13558	-0.519194	0.0482408	Q0P5V9	Slc45a4 Kiaa1126
TRINITY_DN11513_c0_g1	1.33533	0.0228244	0.189378	0.366444	0.0791764	Q5PR68	Cep112 Ccdc46
TRINITY_DN11514_c0_g1	-2.25712	-0.846672	-0.421278	-0.702487	0.23812	Q8R367	Rerg
TRINITY_DN11515_c0_g1	-0.606116	-0.37895	-0.399678	-0.33832	0.741755	Q7TN60	Tmc6
TRINITY_DN11516_c0_g1	-0.692705	1.41597	-0.46207	-0.573872	0.00573617	Q3U2V3	Nudt18 Mth3
TRINITY_DN11517_c0_g1	-2.3271	-2.08567	-1.38547	-1.26499	0.000132292	Q3UGM2	Nek10 Gm282
TRINITY_DN1152_c0_g1	-2.21688	-1.61489	-1.00579	-2.09299	0.309186	P32300	Oprd1
TRINITY_DN11523_c0_g1	-1.45232	-5.57711	-8.75145	-9.92019	8.74856e-10	Q00690	Sele Elam-1
TRINITY_DN11526_c0_g1	0.0294171	0.126561	0.207218	0.346945	0.965123	Q68G58	Apex2 Ape2
TRINITY_DN11527_c0_g3	-0.634775	-2.2762	-0.172975	-1.71208	0.0941152	Q3UHD1	Adgrb1 Bai1
TRINITY_DN11534_c0_g1	-0.498601	-0.0502032	0.298837	0.0591218	0.964249	O88307	Sorl1
TRINITY_DN11539_c0_g1	-1.14459	-8.56325	0.867064	-3.36212	0.069021	Q8BR93	Harbi1
TRINITY_DN11540_c0_g2	-0.597079	0.28745	1.33905	0.533428	0.255989	O08914	Faah Faah1
TRINITY_DN11546_c0_g1	-1.88425	-1.44327	-0.43458	-0.29137	0.000142023	Q9JIL4	Pdzk1 Cap70 Nherf3
TRINITY_DN1155_c0_g1	-0.727762	-0.774246	0.291619	0.389523	0.496754	P19639	Gstm3
TRINITY_DN11554_c0_g1	0.678454	2.92494	1.85034	2.03124	0.14239	Q8BUB6	Ust
TRINITY_DN1156_c0_g1	0.007602	-0.0592417	0.126333	0.10417	0.966496	Q8CHY6	Gatad2a
TRINITY_DN115613_c0_g1	1.40977	1.59169	4.12685	3.46551	#N/A	Q8BGC3	Slc16a12 Mct12
TRINITY_DN11564_c0_g1	0.829884	0.224045	-0.421554	0.228042	0.304569	Q99ME2	Wdr6
TRINITY_DN11564_c0_g2	1.02014	0.234703	0.00210836	-0.0320651	0.364979	Q99ME2	Wdr6
TRINITY_DN11567_c0_g1	8.41411	3.56059	1.54639	5.64529	0.00110568	Q80VN0	Cfap100 Ccdc37
TRINITY_DN11568_c0_g2	0.0707066	0.562556	-1.00178	-1.64934	0.549161	P97718	Adra1a Adra1c
TRINITY_DN11569_c0_g1	0.739263	0.36969	0.156858	0.105897	0.582192	Q8BK08	Tmem11
TRINITY_DN11572_c0_g1	0.0519076	-0.0111832	-0.0319297	-0.0677527	0.9969	Q9Z0H7	Bcl10 Ciper Clap
TRINITY_DN11573_c0_g1	0.905455	-0.133133	0.568602	0.759149	0.539391	A2RSX7	Tyw5
TRINITY_DN11575_c0_g1	-0.689182	-0.136078	-0.226604	-0.085335	0.742703	Q45VK7	Dync2h1 Dhc1b Dnchc2 Kiaa1997
TRINITY_DN1158_c0_g1	-0.292131	-0.219211	-0.252156	-0.540432	0.635218	Q08509	Eps8
TRINITY_DN11581_c0_g1	-1.72279	-0.98951	-1.79581	-1.09966	0.114234	P59034	Lrrc3
TRINITY_DN11584_c0_g1	-5.38384	-1.64408	0.887704	1.9392	0.00316104	P05201	Got1
TRINITY_DN11585_c0_g1	-6.45785	-6.26269	-0.66317	-6.2673	0.190151	Q6PA06	Atl2 Arl6ip2
TRINITY_DN1159_c0_g1	0.777737	0.686757	0.526855	0.439809	0.740784	O08807	Prdx4
TRINITY_DN11591_c0_g1	-2.84074	-3.30259	-3.02762	-3.29816	0.0061622	P30204	Msr1 Scvr
TRINITY_DN11592_c0_g1	-1.66153	-0.670598	0.0863467	-0.396482	0.300885	Q9D7N9	Apmap
TRINITY_DN11593_c0_g1	2.03555	-0.0939492	-0.360387	-1.04704	0.127887	Q62469	Itga2
TRINITY_DN116_c0_g1	-0.245141	1.29297	0.0555801	-0.136119	0.018583	Q9JLL0	Crim1
TRINITY_DN1160_c0_g1	1.27929	0.667389	0.21438	0.444877	0.0582444	Q8VDV8	Mitd1
TRINITY_DN11600_c0_g1	-0.317202	-0.0614438	0.112027	0.0316425	0.837449	P62484	Abi2
TRINITY_DN11600_c0_g2	-0.378408	-0.468394	-0.0313823	-0.162692	0.657138	P62484	Abi2
TRINITY_DN11605_c0_g1	2.41572	1.09306	0.8218	2.53014	4.29142e-06	Q80V62	Fancd2
TRINITY_DN11608_c0_g1	1.15159	-0.26266	-0.653265	-1.79638	0.78861	Q80WQ9	Zbed4 Kiaa0637
TRINITY_DN1161_c0_g1	-0.0663445	-0.137948	-0.0497786	0.0243656	0.967148	Q61550	Rad21 Hr21 Scc1
TRINITY_DN11610_c0_g1	0.899803	0.799403	1.35383	1.45324	0.0204671	Q9R0H0	Acox1 Acox Paox
TRINITY_DN11611_c1_g1	-3.5968	0.375445	0.258359	0.682211	0.175027	P62838	Ube2d2 Ubc4 Ubch4 Ubch5b Ube2d2a
TRINITY_DN11614_c3_g1	-1.16204	-2.5067	-0.684937	-0.965597	0.772707	Q80WQ9	Zbed4 Kiaa0637
TRINITY_DN11617_c0_g1	-0.857718	-0.325617	-0.681398	-0.801502	0.550496	Q7TNG8	Ldhd
TRINITY_DN11618_c0_g1	-0.610643	0.184979	-0.173457	-1.32754	0.712232	Q9WUZ5	Tnni1
TRINITY_DN11619_c0_g1	-0.451832	-0.55228	0.634056	0.626855	0.0916088	P81183	Ikzf2 Helios Zfpn1a2 Znfn1a2
TRINITY_DN11620_c0_g1	-1.09037	0.414691	-0.0720718	0.34764	0.523334	Q80WQ9	Zbed4 Kiaa0637
TRINITY_DN11622_c0_g2	-3.05278	-1.27814	-0.376399	-1.93681	0.0598161	P18052	Ptpra Lrp Ptpa
TRINITY_DN11622_c1_g1	-0.823601	-0.538395	1.10422	-1.44101	0.72409	Q61830	Mrc1
TRINITY_DN11623_c1_g1	1.26945	1.57156	1.15581	1.44436	0.0984648	Q8K013	Gtpbp10
TRINITY_DN11624_c0_g1	-1.08109	-1.32805	-1.42688	-1.53068	0.0753932	Q8CC88	Vwa8 Kiaa0564
TRINITY_DN11626_c0_g1	-0.36424	-0.726601	-0.10145	1.79873	0.22328	Q3TYQ9	Aox4 Aoh2
TRINITY_DN1163_c3_g1	-3.21885	-0.445795	0.57868	0.146778	0.206497	Q0GKD5	Nlrp1b Nalp1b
TRINITY_DN1163_c8_g1	-0.95869	0.738866	0.140054	0.0747015	0.717103	Q8K3Z0	Nod2 Card15
TRINITY_DN11631_c0_g1	2.14924	2.01017	1.66347	2.54107	0.23002	A2ASS6	Ttn
TRINITY_DN11632_c0_g2	-1.04302	-0.847858	5.13215	6.07964	0.590243	P05480	Src
TRINITY_DN11632_c1_g1	-4.64215	-0.779377	-2.1333	-0.680729	0.014454	P16277	Blk
TRINITY_DN11633_c0_g1	0.792851	-0.125456	0.391802	1.14745	0.757187	Q80ZW2	Them6
TRINITY_DN116335_c0_g1	-0.977461	-0.938888	-0.479839	-0.474876	0.242828	B2RY56	Rbm25
TRINITY_DN116335_c0_g2	0.0320318	1.08097	-0.640159	-0.750227	0.347024	B2RY56	Rbm25
TRINITY_DN11641_c0_g1	-2.98693	1.07529	0.58897	1.52084	0.270499	Q9JMC2	Insm2 Mlt1
TRINITY_DN11642_c0_g1	-6.22018	-1.04454	-0.209599	-3.10367	0.0496991	Q6TDP3	Klhl17
TRINITY_DN11644_c0_g1	2.28548	3.48845	2.49784	2.7018	1.38958e-08	P81270	Erg Erg-3
TRINITY_DN11648_c0_g1	0.149115	-1.13173	-0.489343	-0.866967	0.71367	Q9JI74	Klhl1
TRINITY_DN11649_c0_g1	0.0526453	0.636015	0.13021	0.15273	0.52418	Q8BG48	Stk17b Drak2
TRINITY_DN1165_c0_g1	0.813048	0.467421	-0.0742625	-0.268076	0.0182391	P34152	Ptk2 Fadk Fak Fak1 Kiaa4203
TRINITY_DN11650_c0_g1	-4.54645	-1.51938	0.201015	0.898282	0.000483396	Q8BQB6	Saxo2 Fam154b
TRINITY_DN11651_c0_g1	-2.72498	-0.339698	-0.619115	-0.348445	0.548519	Q0GKD5	Nlrp1b Nalp1b
TRINITY_DN11653_c0_g2	-0.588187	-0.525176	-0.537524	-0.543296	0.383376	Q8BQS5	Adipor2 D6Ucla1e Parq2
TRINITY_DN11653_c1_g2	0.15693	0.0489965	0.892055	0.0521158	0.623243	Q8VDL4	Adpgk
TRINITY_DN11660_c0_g1	-1.01764	-0.207858	0.191572	0.208438	0.700157	P97443	Smyd1 Bop
TRINITY_DN11662_c0_g4	-2.59462	0.0716798	-0.98088	-0.849315	0.666979	Q9JME2	Chst11
TRINITY_DN11663_c0_g1	-0.154427	0.710661	0.556508	-0.524089	0.87682	Q9JIB3	Naip7 Birc1g
TRINITY_DN11665_c0_g1	0.23439	-0.478464	0.178241	0.746329	0.583927	Q0VDT2	Znf367 Zff29 Zfp367
TRINITY_DN11667_c0_g1	4.14107	4.68548	2.81703	1.47458	0.000178899	P23953	Ces1c Es1
TRINITY_DN1167_c0_g1	-0.156025	0.0662912	-1.05742	-0.845225	0.0486083	P49698	Hnf4a Hnf-4 Hnf4 Nr2a1 Tcf14
TRINITY_DN11670_c0_g1	0.625137	0.383818	0.445787	1.02002	0.362224	Q9Z0S1	Bpnt1
TRINITY_DN11671_c0_g1	0.132765	0.0669939	0.235724	0.262929	0.927669	Q91YT0	Ndufv1
TRINITY_DN11672_c0_g1	-0.578709	-0.760792	-0.481534	-0.386158	0.796846	Q05909	Ptprg
TRINITY_DN11673_c0_g1	1.42965	0.341611	0.427616	0.586933	0.106443	P16372	Zfp58 Mfg-1 Rslcan5 Zfp817
TRINITY_DN11677_c0_g1	0.298903	1.55643	1.56062	0.825867	0.703283	Q99P50	Ghsr
TRINITY_DN11677_c1_g1	1.274	1.76363	1.5854	0.483595	0.481551	Q99P50	Ghsr
TRINITY_DN1168_c0_g1	-0.27012	-0.210437	-0.295427	-0.180324	0.9844	Q9CX56	Psmd8
TRINITY_DN11685_c0_g1	0.184678	-3.05981	-1.19214	-1.61299	0.87755	P50171	Hsd17b8 H2-Ke6 Hke6
TRINITY_DN11685_c0_g3	2.08571	3.67851	3.88103	4.769	0.48208	P50171	Hsd17b8 H2-Ke6 Hke6
TRINITY_DN11688_c0_g1	-1.83109	0.564314	0.0381286	0.137648	0.558238	D3YZI9	Pgbd5
TRINITY_DN11692_c0_g1	-3.53027	-2.28515	-3.72155	-3.74117	1.66509e-11	Q60989	Xiap Aipa Api3 Birc4 Miha
TRINITY_DN11694_c0_g1	-2.80658	-1.10726	-0.103638	-1.48456	0.0222732	Q3UFS0	Zyg11b Kiaa1730
TRINITY_DN11698_c0_g1	-0.938626	-0.547836	0.504813	0.921157	0.00386194	Q8C0M9	Asrgl1
TRINITY_DN11699_c0_g1	-0.641089	0.67923	0.0529654	-0.0871748	0.353584	Q8BLF1	Nceh1 Aadacl1 Kiaa1363
TRINITY_DN11699_c0_g3	-4.48112	-2.7287	-0.2222	0.24335	0.0040756	A2A7Z8	Aadacl3
TRINITY_DN117_c1_g2	2.83074	1.87538	1.33017	1.79863	3.22248e-06	P40240	Cd9
TRINITY_DN1170_c0_g1	0.863505	-0.875959	-2.19603	-1.3013	0.113308	O70165	Fcn1 Fcna
TRINITY_DN11704_c0_g1	-3.65143	-3.44465	-1.98038	-1.79329	8.00766e-05	Q8BZL4	Gpr22
TRINITY_DN11705_c0_g1	0.339829	0.322151	-0.154285	0.160906	0.773963	Q80UJ9	Setmar
TRINITY_DN11707_c0_g1	-5.01389	-1.94429	1.39698	2.20537	0.00239568	Q9Z1P4	Lgr5 Fex Gpr49
TRINITY_DN1171_c0_g1	-1.81665	-0.109274	0.278012	-0.285266	0.000217855	Q8BZ20	Parp12 Zc3hdc1
TRINITY_DN11719_c0_g1	0.331031	1.39537	-1.91756	2.40302	#N/A	B2RX14	Tut4 Kiaa0191 Zcchc11
TRINITY_DN1172_c0_g1	-1.40884	-0.226523	0.770121	-0.533411	0.0476931	P04756	Chrna1 Acra
TRINITY_DN11726_c0_g2	0.153405	-0.207539	-0.563454	-0.0730162	0.714703	P59266	Fitm2 Fit2
TRINITY_DN11733_c0_g1	-0.011211	0.600001	-0.213585	0.127715	0.851742	Q78DX7	Ros1 Ros Ros-1
TRINITY_DN11734_c0_g1	-0.981376	-0.100065	0.152143	-0.00627426	0.124586	E9Q555	Rnf213 Mystr
TRINITY_DN11734_c1_g1	-1.05298	-1.03632	0.56758	-0.26829	0.00731473	O88851	Rbbp9 Bog
TRINITY_DN11738_c0_g1	-1.30458	-1.09333	0.25474	-1.03276	0.251291	Q66K08	Cilp
TRINITY_DN11738_c1_g1	-0.336516	1.16841	1.81789	1.32896	1.66999e-05	Q8BLQ7	Slc7a4
TRINITY_DN11743_c0_g1	-0.0404206	-0.53629	-0.0100619	0.324106	0.724913	Q1LZI2	Slc35f3
TRINITY_DN11747_c0_g1	1.40304	-0.823131	0.304928	-0.696228	0.495231	Q6R6I7	Rxfp1 Gm1018 Lgr7
TRINITY_DN1175_c0_g1	-1.88448	0.719298	-0.189759	-0.142117	0.216559	A2AV25	Fibcd1
TRINITY_DN11751_c0_g1	-0.119211	-0.15844	-0.130521	-0.284568	0.975645	Q8BX90	Fndc3a D14Ertd453e Fndc3 Kiaa0970
TRINITY_DN11755_c0_g1	-0.239291	-0.292914	-0.241312	-0.399877	0.911998	Q61687	Atrx Hp1bp2 Xnp
TRINITY_DN11756_c0_g1	0.745219	-0.0165468	0.184613	0.490093	0.328373	Q923Z3	Mto1
TRINITY_DN11757_c0_g1	-0.738874	-0.319055	-0.692713	-0.964866	0.00374784	Q9QYK7	Rnf11 N4wbp2 Sid1669
TRINITY_DN117579_c0_g1	-6.13587	-1.11345	-4.8433	-3.78625	#N/A	P50220	Nkx2-1 Nkx-2.1 Titf1 Ttf1
TRINITY_DN11759_c0_g1	-4.46171	-5.72686	-8.61756	-8.1869	2.52399e-24	P20918	Plg
TRINITY_DN11761_c0_g1	-0.586564	-0.741177	-0.623357	-0.753406	0.605692	Q8C753	Katnip Kiaa0556
TRINITY_DN11762_c0_g1	9.79132	5.14688	3.25877	6.64226	1.66309e-11	Q6UJY2	Slc9c1 Gm610 Slc9a10
TRINITY_DN11766_c0_g1	-0.663317	0.0792475	-0.334516	-0.291317	0.478081	Q8BP56	Pgghg Athl1
TRINITY_DN11774_c0_g1	0.0455511	-0.649573	-0.966549	-0.717063	0.000544315	Q9R118	Htra1 Htra Prss11
TRINITY_DN11776_c0_g1	-2.05824	-2.76852	-0.877612	-0.653078	0.109647	O89114	Dnajb5 Hsc40
TRINITY_DN11779_c0_g1	-1.39291	-0.407797	-0.726652	-0.79006	0.0979397	Q65Z95	Ypel2
TRINITY_DN11779_c0_g2	-2.55411	-0.0963469	-2.12034	-0.664077	0.0610534	Q65Z95	Ypel2
TRINITY_DN1178_c0_g1	-1.79755	2.20274	1.12465	0.0383525	0.00656556	Q6PA06	Atl2 Arl6ip2
TRINITY_DN11783_c0_g1	0.234024	-0.296296	-0.27144	-0.960748	0.0577096	Q9EQG9	Cert1 Cert Col4a3bp Stard11
TRINITY_DN11784_c0_g1	0.348357	0.116632	1.84974	-1.44034	0.911478	Q8BZM0	Klhl12 C3ip1
TRINITY_DN11786_c0_g1	0.0727299	-0.174031	0.291608	0.580659	0.699726	Q76EC5	Chst9
TRINITY_DN11790_c0_g1	-0.0291193	0.0845675	0.344968	0.324674	0.836817	Q8VBT2	Sds
TRINITY_DN11792_c0_g1	-2.08235	0.512371	0.263538	0.401064	0.101698	Q60716	P4ha2
TRINITY_DN11793_c0_g1	1.02864	0.234966	0.394803	0.245003	0.460265	Q8BI36	Jkamp Jamp
TRINITY_DN11797_c0_g1	-0.968618	0.44498	-0.22161	0.181093	0.591018	Q50H32	Grxcr1 pi
TRINITY_DN11798_c0_g1	-1.83856	-1.25971	0.679199	-0.239613	0.211784	Q80WQ9	Zbed4 Kiaa0637
TRINITY_DN118_c0_g1	-0.92918	-1.45517	1.61622	1.23148	0.818069	Q9CZL5	Pcbd2 Dcoh2 Dcohm
TRINITY_DN1180_c0_g1	-0.81937	-0.193899	-0.665126	-0.234009	0.379794	Q9D7A8	Armc1
TRINITY_DN11800_c0_g1	-2.58418	-2.0441	-3.38562	-3.10757	0.0253342	Q01102	Selp Grmp
TRINITY_DN11802_c0_g1	1.8383	0.719306	0.237459	1.09521	0.00010886	Q9D8F1	Alkbh4
TRINITY_DN11804_c0_g1	2.09149	0.220528	-0.0951506	1.19875	0.324324	Q8CIB9	Esco2
TRINITY_DN11808_c0_g1	0.801511	0.255137	0.436943	0.15797	0.61798	Q5BL07	Pex1
TRINITY_DN11809_c0_g1	-0.453804	0.935542	1.72638	1.37897	0.0190403	E9PVD3	Dchs1
TRINITY_DN11817_c0_g1	-2.76674	-2.3364	-2.31348	-1.69319	0.000254835	Q80X72	Lrrc15
TRINITY_DN11818_c0_g1	0.858405	0.669676	0.128893	0.756342	0.83652	P42125	Eci1 Dci
TRINITY_DN11819_c0_g1	2.62039	1.49695	1.39399	0.662775	0.567421	O08999	Ltbp2
TRINITY_DN1182_c0_g1	-0.202113	-0.121007	-0.412485	-0.359926	0.796607	Q60848	Hells Lsh Pasg
TRINITY_DN11822_c0_g1	-1.39741	-1.88071	-0.991992	-0.977521	0.000463284	Q62225	Cish Cis
TRINITY_DN11825_c0_g1	1.62755	2.10208	2.49218	2.37773	0.00064498	Q812F8	Mgat4b
TRINITY_DN11826_c0_g1	8.53676	5.511	5.90627	6.04832	3.57192e-10	Q8VE49	Duoxa1
TRINITY_DN11827_c0_g1	0.576999	1.09453	2.50741	1.54105	0.0241305	Q03311	Bche
TRINITY_DN1183_c0_g1	1.44214	1.65343	1.30085	1.48624	0.0160707	Q9D0B5	Tstd3
TRINITY_DN11830_c0_g1	1.83875	1.19105	2.11944	1.15276	0.258568	Q11011	Npepps Psa
TRINITY_DN11831_c0_g1	10.1279	5.2016	1.80301	7.01431	9.28522e-11	P20918	Plg
TRINITY_DN11833_c0_g1	-1.52003	-0.807027	-0.00811663	-0.567531	0.776334	Q6DFV8	Vwde Gm467
TRINITY_DN118396_c0_g1	1.57176	0.839759	0.830085	0.941708	0.0201659	Q99LZ3	Gins4 Sld5
TRINITY_DN11840_c0_g1	-4.54571	0.0918041	-1.68779	-3.35627	0.47798	Q62210	Birc2
TRINITY_DN11845_c0_g1	1.17653	0.175295	0.938079	0.93285	0.321515	B1AUE5	Pex10
TRINITY_DN11846_c0_g1	5.00436	-0.847858	1.35772	4.99549	#N/A	Q60597	Ogdh Kiaa4192
TRINITY_DN11847_c0_g1	0.947191	-0.0682337	0.166715	0.596892	0.17358	Q8CC12	Cdan1
TRINITY_DN1185_c0_g1	2.06315	1.65469	1.30303	0.6159	0.000153103	Q9WV70	Noc2l Nir
TRINITY_DN11850_c0_g1	-0.125812	-0.214987	-0.00377852	0.109517	0.989049	Q6A070	Togaram1 Fam179b Kiaa0423
TRINITY_DN118500_c0_g1	0.90306	-0.584801	-3.37016	0.0225562	#N/A	O35864	Cops5 Csn5 Jab1 Kic2
TRINITY_DN118565_c0_g1	-3.64671	-2.96429	-3.16632	0.0809826	0.534227	P70660	Neurog1 Ath4c Neurod3 Ngn Ngn1
TRINITY_DN11859_c0_g1	-2.35098	-2.1014	-0.923102	-0.660112	0.315795	Q3UHD3	Mtus2 Cazip Kiaa0774 Tip150
TRINITY_DN1186_c0_g1	0.350714	0.771324	1.62579	1.05679	0.0730613	P50295	Nat2 Aac2
TRINITY_DN11869_c0_g1	-0.00220653	0.624322	0.522854	1.50975	0.0432979	Q1LZI2	Slc35f3
TRINITY_DN1187_c0_g1	0.984242	0.369647	0.101964	0.541269	0.0332299	Q9QX66	Dpf1 Baf45b Neud4
TRINITY_DN11873_c0_g1	-1.40564	-0.784653	-0.7404	-1.01919	0.0347186	Q8BG40	Katnb1
TRINITY_DN11877_c0_g2	2.65838	1.58179	1.48675	1.42918	3.24945e-05	Q80X41	Vrk1
TRINITY_DN11880_c0_g1	-2.28634	1.31091	1.68364	3.03916	0.000444189	P11276	Fn1
TRINITY_DN11881_c0_g1	-1.30983	0.0531287	-0.176294	-0.171613	0.033197	Q80TE7	Lrrc7 Kiaa1365 Lap1
TRINITY_DN11885_c0_g1	-0.485902	-0.28255	-0.300127	-0.255403	0.553033	Q9D5R2	Wdr20 Wdr20b Wdr20rt
TRINITY_DN11885_c0_g2	-1.58275	-2.22846	-2.88529	-3.17985	0.0099753	P35175	Stfa1 Stf-1 Stf1
TRINITY_DN118883_c0_g1	-2.47119	-0.937618	-0.659007	-0.473758	0.0103319	P70193	Lrig1
TRINITY_DN1189_c0_g1	-0.379788	-0.716918	-0.258581	-0.148437	0.658337	Q3UHD3	Mtus2 Cazip Kiaa0774 Tip150
TRINITY_DN11890_c0_g1	1.42571	0.561362	0.935292	1.40419	0.141825	Q9JJN0	Polh Rad30a Xpv
TRINITY_DN11894_c0_g2	-0.220319	-0.467493	-0.287409	-0.387492	0.505924	Q9CR30	Josd2
TRINITY_DN11895_c0_g1	-1.37325	-1.22848	-1.35677	0.187515	0.769012	A2ASS6	Ttn
TRINITY_DN11896_c0_g1	0.287013	0.607163	0.227268	0.0792072	0.986816	Q812F8	Mgat4b
TRINITY_DN11898_c0_g1	0.602374	-0.179409	0.132843	-0.0748332	0.424807	A2RSY6	Trmt1l
TRINITY_DN119_c0_g1	2.51915	1.09986	1.07934	1.61453	0.000971962	P43346	Dck
TRINITY_DN1190_c0_g1	-1.48328	-1.23652	-1.84514	-1.12573	3.35278e-07	O09173	Hgd Aku Hgo
TRINITY_DN11900_c0_g1	0.803404	0.409471	0.142448	0.101044	0.213242	Q3UPH1	Prrc1
TRINITY_DN11904_c0_g1	-1.05591	-1.07992	-0.0792855	0.29683	0.306577	Q0VG85	Ccdc162
TRINITY_DN11908_c0_g1	-6.00884	-1.6876	0.746194	1.85632	5.14276e-08	Q7TSD4	Tbata Spatial
TRINITY_DN1191_c0_g1	1.88248	1.33576	1.27014	0.816999	0.00520084	Q9D1E6	Tbcb Ckap1
TRINITY_DN11911_c0_g1	-1.85584	-1.63661	-0.480856	0.156438	#N/A	P21956	Mfge8
TRINITY_DN11911_c0_g2	-3.19086	-0.989896	-0.280814	0.411511	0.0467391	P70389	Igfals Albs Als
TRINITY_DN11913_c0_g1	-0.31885	-0.419442	0.0558867	0.054187	0.951091	Q9DBA8	Amdhd1
TRINITY_DN11917_c0_g1	-0.194666	1.09819	2.19705	1.6311	0.202944	Q8BZM0	Klhl12 C3ip1
TRINITY_DN1192_c0_g1	-0.311445	-0.157035	-0.294605	-0.131885	0.839816	Q8C3B8	Rft1
TRINITY_DN11926_c0_g1	2.6967	1.21264	-0.444359	1.35044	0.041944	Q9QYJ1	St6galnac5 Siat7e
TRINITY_DN11928_c0_g1	-2.26913	-0.394083	0.900031	0.0601276	0.258568	P12804	Fgl2 Fiblp
TRINITY_DN11929_c0_g1	0.492954	-0.0711879	-0.321929	-0.142037	0.745567	Q3U0M1	Trappc9 Kiaa1882 Nibp
TRINITY_DN1193_c0_g1	-0.263568	-0.272551	-0.839395	-0.863356	0.258568	Q80VM7	Ankrd24
TRINITY_DN1194_c0_g2	-0.362646	-0.714673	-0.275375	-0.237619	0.717805	O54950	Prkag1 Prkaac
TRINITY_DN1194_c0_g3	-0.966925	-0.191709	-0.316253	-0.11594	0.478355	O54950	Prkag1 Prkaac
TRINITY_DN11941_c0_g1	0.206361	0.585045	-0.135124	0.744471	0.433328	Q8BWP8	B4gat1 B3gnt1 B3gnt6
TRINITY_DN1195_c0_g1	0.739619	1.46989	1.34619	1.47456	0.0244641	Q99MZ7	Pecr
TRINITY_DN11950_c0_g1	-0.849488	-1.48544	-2.10497	-7.47031	0.758872	P97931	Ung Ung1
TRINITY_DN11956_c0_g1	7.30607	-0.847979	9.14377	9.0118	0.419323	Q80Z71	Tnn Tnw
TRINITY_DN11958_c0_g1	-1.45361	-1.95346	-1.26381	-1.71182	0.073874	D3YXG0	Hmcn1
TRINITY_DN1196_c0_g1	1.9925	1.24356	0.922322	0.42446	0.00739545	Q9D7B1	Dus2 Dus2l
TRINITY_DN11960_c0_g1	4.1303	2.35787	1.70197	2.11014	1.66224e-05	Q99MV1	Tdrd1
TRINITY_DN119650_c0_g1	-2.19669	-2.79974	0.155259	0.0502994	0.466243	Q3UP23	Tmem26
TRINITY_DN11966_c0_g1	-0.836508	-0.101748	-1.58963	-0.137437	0.702234	A2AVA0	Svep1
TRINITY_DN11969_c1_g1	1.2465	1.22264	0.61004	0.853182	0.89496	Q8BZM0	Klhl12 C3ip1
TRINITY_DN1197_c0_g1	1.7176	0.547454	0.215852	0.719715	0.00602119	Q8K1K9	Hinfp Mizf
TRINITY_DN11972_c0_g1	2.55414	2.91381	0.185201	0.152396	2.28788e-09	Q8JZV9	Bdh2 Dhrs6
TRINITY_DN11973_c0_g1	1.01071	0.230016	0.41475	-0.000630994	0.175244	P61205	Arf3
TRINITY_DN11975_c0_g1	-2.86717	1.30332	2.36887	1.41452	0.0467665	Q9ET38	Cldn19
TRINITY_DN119754_c0_g1	-0.0951406	0.367584	0.97694	-0.181084	0.878338	Q61361	Bcan
TRINITY_DN11978_c0_g1	-1.32041	-0.351107	-0.124163	-0.0912187	0.14118	Q8BN59	Larp6
TRINITY_DN11984_c0_g1	-0.83245	-0.161563	-0.303604	-1.164	0.56677	Q9EP89	Lactb Lact1
TRINITY_DN119855_c0_g1	1.43235	0.456309	0.342501	0.570687	0.0200596	Q9CQ85	Timm22 Tim22
TRINITY_DN1199_c0_g1	2.14181	1.34761	0.522704	0.559254	0.000117079	Q9D084	Cenps Apitd1 FAAP16 MHF1
TRINITY_DN11991_c0_g1	0.506831	-0.0657001	-0.296119	-0.0831496	0.397798	Q91WK5	Gcsh
TRINITY_DN11992_c0_g1	-2.85419	-0.661812	-0.49799	-1.52815	0.00412533	Q91VU6	Dcaf11 D14Ucla1 Wdr23
TRINITY_DN11994_c0_g1	1.39494	-0.214353	-0.348009	0.0363676	4.52665e-05	Q6ZPJ3	Ube2o Kiaa1734
TRINITY_DN12_c0_g1	-7.32745	-3.53987	-1.19127	-0.45079	6.47367e-12	Q61549	Adgre1 Emr1 Gpf480
TRINITY_DN12_c0_g2	-0.784421	2.17642	-0.140395	-0.778305	0.0115742	O35516	Notch2
TRINITY_DN12_c1_g1	-0.589735	2.20948	-0.493865	-0.455214	0.0173562	Q61554	Fbn1 Fbn-1
TRINITY_DN120_c0_g1	-1.12431	-0.217443	-0.093109	-0.718369	0.12957	Q924T7	Rnf31 Paul
TRINITY_DN120_c1_g1	0.249889	-0.329878	-0.176843	0.128369	0.813653	Q4ACU6	Shank3 Kiaa1650 Prosap2
TRINITY_DN1200_c0_g1	0.960845	0.905963	0.732521	0.983358	0.385039	O55060	Tpmt
TRINITY_DN12004_c0_g1	-0.807401	-0.7461	-0.299985	-0.19408	0.478355	Q8BPI1	Dnaaf2 Ktu
TRINITY_DN12009_c0_g1	-1.63282	-1.09934	-0.358689	-0.558366	0.755007	Q8BZM0	Klhl12 C3ip1
TRINITY_DN1201_c0_g1	-0.30698	-0.0766853	-0.0730678	0.295058	0.681411	Q62210	Birc2
TRINITY_DN12010_c0_g1	0.509342	1.47505	0.659652	0.721825	0.578263	Q3V080	Znf583 Zfp583
TRINITY_DN12013_c0_g1	-4.73846	-5.31247	-6.29026	-5.80546	1.32966e-30	Q811W2	Cyp26b1
TRINITY_DN12014_c0_g1	0.444518	0.790575	0.567145	0.44651	0.660189	A2AM29	Mllt3 Af9
TRINITY_DN12019_c0_g1	-2.58852	-0.423127	0.837596	-7.58556	0.0322246	Q62210	Birc2
TRINITY_DN1202_c0_g1	0.327533	0.699852	-0.102609	-0.512112	0.148168	P47934	Crat
TRINITY_DN12020_c0_g1	0.56559	0.744326	0.83471	0.764777	0.0325883	O08550	Kmt2b Mll2 Trx2 Wbp7
TRINITY_DN12021_c0_g1	1.18134	1.83076	0.903446	0.230458	0.346274	Q8K078	Slco4a1 Oatp4a1 Oatpe Slc21a12
TRINITY_DN12022_c0_g1	-0.812789	-0.917212	-0.741288	0.0017899	0.413667	Q8BL99	Dop1a D9Ertd809e Dopey1
TRINITY_DN12023_c0_g1	0.674187	-0.3344	-0.500174	0.0903439	0.313383	Q61371	Ift88 Tg737 Tg737Rpw TgN737Rpw Ttc10
TRINITY_DN12025_c0_g1	-8.89142	-5.24953	-0.889687	-3.52153	5.50466e-05	Q8R151	Znfx1
TRINITY_DN12027_c0_g2	-0.462975	-0.989837	-0.00828563	-0.745183	0.874631	Q2TJ95	Rspo3
TRINITY_DN12028_c0_g1	-2.55839	0.222316	0.114062	0.0115629	0.271293	Q8VHR0	Pcdh18 Kiaa1562
TRINITY_DN12029_c0_g1	-0.503336	-0.102768	0.299889	-0.566625	0.364634	P49290	Epx Eper
TRINITY_DN120299_c0_g1	-0.0407635	-0.666055	-0.468614	-3.7906	#N/A	Q9CWG1	Glipr1
TRINITY_DN1203_c0_g1	-2.00115	0.0499034	-1.25468	0.0739654	0.528709	Q9Z176	Ppp2r3d Ppp2r3a Ppp2r6
TRINITY_DN120306_c0_g1	-0.837339	-1.0619	-1.50731	-2.05929	0.485546	O88799	Zan
TRINITY_DN12036_c0_g1	0.145854	0.1627	0.320723	0.878978	0.803133	Q0VEJ0	Cep76
TRINITY_DN12038_c0_g1	0.253982	-0.491591	0.34947	-0.28748	0.861333	P11369	Pol Gm17492
TRINITY_DN1204_c0_g1	-2.23435	-1.60876	-0.450518	-1.87463	0.019621	A2AX52	Col6a4 Dvwa
TRINITY_DN12041_c0_g1	-0.993424	0.189831	0.640829	0.827463	0.909836	P03958	Ada
TRINITY_DN12041_c0_g2	-0.249474	-2.2315	-2.98118	-3.33035	#N/A	P03958	Ada
TRINITY_DN12042_c0_g1	-0.568721	-0.525274	-0.275627	-0.601006	0.523334	Q9Z2V9	Ccni
TRINITY_DN12042_c1_g1	-0.00867196	-0.0999774	0.0249405	0.0209543	0.99598	Q921N8	Gps2
TRINITY_DN12044_c0_g1	1.75948	2.09705	1.50452	2.22075	0.0132352	Q99MZ7	Pecr
TRINITY_DN12046_c0_g1	0.371078	-0.467067	0.232614	0.436172	0.471991	O88978	Lrrc6 Lrtp Mc2
TRINITY_DN12047_c0_g1	0.293015	0.32484	-0.453633	0.217638	0.852898	Q8BGF8	Slc35d3 Frcl1
TRINITY_DN12049_c0_g1	-0.252242	-0.0196081	0.419448	-0.206867	0.137957	Q9QWH1	Phc2 Edr2 Ph2
TRINITY_DN1205_c0_g1	0.357861	-0.0930202	-0.29186	-0.379808	0.5848	Q2M3X8	Phactr1
TRINITY_DN12052_c0_g1	-3.90607	-3.10234	-2.47462	-2.71548	2.92103e-07	Q8R422	Cd109
TRINITY_DN12055_c0_g1	0.738541	-0.149749	0.160029	0.0609609	0.702259	Q9CQJ2	Pih1d1 Nop17
TRINITY_DN12057_c0_g1	0.522152	0.553161	0.138061	-0.109811	0.512432	Q5RL51	Gstcd
TRINITY_DN1206_c0_g1	-2.72325	-1.82595	-1.90081	-1.91311	2.06143e-08	Q5DTL9	Slc4a10 Kiaa4136 Ncbe
TRINITY_DN12061_c0_g2	-1.8056	-1.45824	-1.04639	-0.831813	0.799941	O08786	Cckar
TRINITY_DN12063_c0_g1	0.405387	-0.179048	0.00688713	0.169917	0.767676	Q91V41	Rab14
TRINITY_DN12064_c0_g1	1.19037	0.899816	1.78251	1.08921	0.158669	Q60928	Ggt1 Ggt Ggtp
TRINITY_DN12067_c0_g1	0.129189	-0.29469	-0.35978	-0.0646792	0.88123	B1AZI6	Thoc2
TRINITY_DN12068_c1_g2	-0.114774	-0.215186	0.124911	0.131295	0.963203	P28575	Ipp Mipp
TRINITY_DN12070_c0_g1	-0.394346	0.137891	-0.0609056	-0.0728466	0.69282	Q9D0I6	Wdsub1
TRINITY_DN12071_c0_g1	-0.925388	-0.808685	-0.392137	-0.69547	0.319726	P11369	Pol Gm17492
TRINITY_DN12072_c0_g1	0.763682	-0.117345	-0.294896	0.448095	0.0255478	P46718	Pdcd2 Rp8
TRINITY_DN12072_c0_g2	1.0751	0.721448	0.406061	0.424288	0.969778	Q6ZPT1	Klhl9 Kiaa1354
TRINITY_DN12072_c1_g1	2.11516	1.97666	1.94047	1.46583	#N/A	Q8BUL5	Klhl7
TRINITY_DN12072_c1_g2	2.29274	2.70718	1.11813	2.52542	#N/A	E0CZ16	Klhl3
TRINITY_DN12075_c0_g1	-0.141877	0.74442	-0.811062	0.0124159	0.904966	Q64310	Surf4 Surf-4
TRINITY_DN12076_c0_g1	0.00577129	-0.245597	0.872709	0.374943	0.572054	Q6ZPG2	Wdr90 Kiaa1924
TRINITY_DN12078_c0_g1	-0.683613	0.0446483	-0.431585	-0.73628	0.492233	P58242	Smpdl3b Asml3b
TRINITY_DN12084_c0_g1	0.0266229	0.548605	0.219677	0.0814685	0.537909	Q8BZ47	Znf609 Kiaa0295 Zfp609
TRINITY_DN12089_c0_g1	0.066418	-0.462423	-0.685069	-0.649524	0.241648	P63154	Crnkl1
TRINITY_DN1209_c0_g1	2.3963	1.26528	1.40136	1.71417	0.000742738	Q61457	Ccne1 Ccne
TRINITY_DN1209_c1_g1	-0.66733	-0.856913	-1.25663	-1.55629	0.693497	P11369	Pol Gm17492
TRINITY_DN120943_c0_g1	-6.38112	-6.18595	-1.84595	-0.467133	0.019927	Q61555	Fbn2 Fbn-2
TRINITY_DN12099_c0_g1	-0.718814	-0.328874	-0.145289	-0.854442	0.809758	O35379	Abcc1 Abcc1a Abcc1b Mdrap Mrp
TRINITY_DN12099_c1_g1	3.99898	2.39957	2.16238	2.47619	0.0398223	Q9R1X5	Abcc5 Abcc5a Mrp5
TRINITY_DN121_c0_g1	-0.141703	-2.05462	-0.265888	0.469312	0.168766	E9Q8T7	Dnah1 Dhc7 Dnahc1
TRINITY_DN121_c1_g1	-1.07028	-1.8956	-0.90385	-0.238605	0.18676	E9Q8T7	Dnah1 Dhc7 Dnahc1
TRINITY_DN121_c1_g2	-0.769036	-2.01602	-1.37666	-0.388707	0.501949	E9Q8T7	Dnah1 Dhc7 Dnahc1
TRINITY_DN12105_c0_g1	0.279502	0.0590086	0.369011	0.430419	0.94938	Q99MB3	Tm2d1 Bbp
TRINITY_DN12115_c0_g1	-0.187456	-0.768579	-0.713781	-0.634816	0.57485	Q9QXA6	Slc7a9 Bat1
TRINITY_DN121189_c0_g1	-4.83421	-4.63904	-3.53565	1.36359	#N/A	Q60754	Marco
TRINITY_DN12119_c0_g1	-0.476048	0.233283	0.331691	0.906495	0.898955	Q8C8R3	Ank2 AnkB
TRINITY_DN12119_c0_g2	1.11296	1.02904	1.40566	1.6462	0.449808	Q9WV72	Asb3
TRINITY_DN1212_c0_g1	1.88919	-0.899814	1.83743	1.09926	0.437015	Q8BR93	Harbi1
TRINITY_DN121208_c0_g1	-2.23157	-1.57373	1.1864	-2.01997	0.387879	Q8VBX4	Cd207 Clec4k
TRINITY_DN12121_c0_g2	0.897456	0.59832	-0.228817	0.0152426	0.9969	Q9DB30	Phkg2
TRINITY_DN12125_c0_g1	-0.649267	0.728413	0.366116	-0.166972	0.655236	P29594	Casp2 Ich1 Nedd-2 Nedd2
TRINITY_DN121288_c0_g1	-3.46978	-6.26022	-1.55332	-2.63117	0.815313	Q62432	Smad2 Madh2 Madr2
TRINITY_DN121293_c0_g1	1.44907	2.08163	-1.54099	1.50162	0.764152	O08863	Birc3
TRINITY_DN1213_c0_g1	-0.687838	0.0294013	-0.224469	-0.274076	0.302917	Q5U430	Ubr3 Kiaa2024 Zfp650 Znf650
TRINITY_DN12131_c1_g1	2.00162	0.832878	1.60607	0.625726	0.510176	Q8BYI9	Tnr
TRINITY_DN121320_c0_g1	2.0143	-1.92121	0.673965	-2.17285	0.149802	P24622	Cryaa Crya1
TRINITY_DN12134_c0_g2	2.10561	-0.849262	-1.04408	-4.4995	0.00492704	Q9Z2E3	Ern2 Ire2
TRINITY_DN12135_c0_g1	0.344725	-0.167574	-0.126907	-0.133983	0.832686	Q6NS45	Ccdc66
TRINITY_DN12138_c0_g1	2.97	2.13246	1.79556	-2.15327	#N/A	A2ASS6	Ttn
TRINITY_DN1214_c0_g1	-0.114664	-0.355231	-0.232445	-0.215163	0.746161	O35166	Gosr2 Gs27
TRINITY_DN12144_c0_g1	-0.501859	-0.704784	-0.675817	-0.454714	0.502984	Q8BP47	NARS1 Nars
TRINITY_DN121453_c0_g1	-1.48304	-5.98965	-5.06483	-2.90634	#N/A	Q64464	Cyp3a13 Cyp3a-13
TRINITY_DN121453_c0_g2	0.317927	-1.15521	-0.193364	-1.54765	#N/A	Q64464	Cyp3a13 Cyp3a-13
TRINITY_DN12146_c0_g1	-0.864237	1.12928	-0.123283	0.361647	0.205998	Q80XI3	Eif4g3
TRINITY_DN1215_c0_g1	-0.479875	0.076624	0.149199	0.02933	0.661644	A2AJT4	Pnisr Sfrs18 Srrp130
TRINITY_DN12151_c0_g2	-0.449917	-2.00232	-0.0702035	0.174892	0.318457	Q9QZ82	Cyp11a1 Cyp11a
TRINITY_DN12156_c0_g2	-0.462457	-1.4267	-0.08353	-0.800601	0.772707	P23927	Cryab Crya2
TRINITY_DN12158_c0_g1	-1.25747	-1.02979	-0.42021	-0.614283	0.580633	Q9Z1B3	Plcb1 Plcb
TRINITY_DN1216_c0_g1	-0.845708	-0.380132	-0.0677059	-0.246668	0.38413	P58465	Ctdspl Nif1 Nifl
TRINITY_DN12164_c0_g1	-0.73159	-0.00921363	-0.49282	0.112202	0.887445	Q61704	Itih3
TRINITY_DN12166_c0_g2	-0.0903589	0.942131	1.28507	0.413571	0.23252	O08750	Nfil3 E4bp4
TRINITY_DN12168_c0_g1	1.32901	3.62577	3.82488	3.20819	0.382349	Q60989	Xiap Aipa Api3 Birc4 Miha
TRINITY_DN1217_c0_g1	-4.11881	0.882784	-7.336	-1.16624	0.121889	B2RX14	Tut4 Kiaa0191 Zcchc11
TRINITY_DN12172_c0_g1	-0.0526372	-0.34308	-0.580153	-0.582729	0.136879	Q8R107	Prelid1 Preli
TRINITY_DN12176_c0_g1	0.188462	-3.96813	-0.121282	-2.71883	0.859199	Q9EQY0	Ern1 Ire1
TRINITY_DN121786_c0_g1	-0.194414	-5.20354	1.52621	0.717298	0.818351	E9Q555	Rnf213 Mystr
TRINITY_DN1218_c0_g1	-0.473021	0.274849	0.0363626	-0.225026	0.364728	Q8BXJ2	Trerf1
TRINITY_DN12180_c0_g1	-0.626849	2.08783	2.38925	2.04141	0.0746775	A2AV25	Fibcd1
TRINITY_DN12183_c0_g1	-2.70296	-0.100178	-0.370556	-0.678459	0.015699	E9QAM5	Helz2
TRINITY_DN12187_c0_g2	1.7555	0.475885	1.32405	1.28512	0.262831	Q8BW56	Gtdc1
TRINITY_DN121881_c0_g1	-1.81563	-0.916827	-1.60992	-3.7985	#N/A	P21956	Mfge8
TRINITY_DN12189_c0_g1	0.417648	0.372485	0.108241	0.0985409	0.535185	O08810	Eftud2 Snrp116
TRINITY_DN12191_c0_g1	2.19302	-1.90209	-3.10869	-8.30181	0.000303125	Q9Z2E3	Ern2 Ire2
TRINITY_DN12191_c0_g2	-5.65688	0.156581	0.0331045	1.2713	0.169373	Q60806	Plk3 Cnk Fnk
TRINITY_DN12191_c1_g1	-1.40827	-2.24226	-1.62621	0.170096	#N/A	Q9EQY0	Ern1 Ire1
TRINITY_DN12196_c0_g1	-2.82392	0.450921	0.425043	0.541247	0.000907327	Q99JR5	Tinagl1 Arg1 Lcn7 Tinagl
TRINITY_DN122_c0_g1	-0.59353	-0.251396	-0.218559	0.204959	0.360379	Q9D2C7	Tmbim6 Tegt
TRINITY_DN122_c0_g2	-0.908823	0.0857522	0.149899	0.232944	0.139287	P31649	Slc6a13 Gabt2 Gabt3 Gat-3 Gat2 Gat3
TRINITY_DN1220_c0_g1	1.43545	0.75356	0.738309	0.865415	0.0906325	Q9Z2R9	Eif2ak1 Hri
TRINITY_DN1220_c1_g1	-2.15566	-0.335778	-0.267479	-0.24504	0.47477	Q9WVF6	Pla2g2d Pla2a2 Splash
TRINITY_DN12200_c0_g1	-19.351	0.902129	3.41918	-19.0923	#N/A	Q8VCC9	Spon1
TRINITY_DN12203_c0_g1	-0.467818	-0.771888	0.843799	-0.511214	0.607396	P29594	Casp2 Ich1 Nedd-2 Nedd2
TRINITY_DN122057_c0_g1	7.03014	5.45176	5.9387	5.57955	0.0276763	P98156	Vldlr
TRINITY_DN12208_c0_g1	-4.85063	0.526561	-0.369297	-1.30231	0.208927	E9Q555	Rnf213 Mystr
TRINITY_DN12208_c1_g1	-8.25982	0.859395	0.182168	-0.67909	0.0177583	E9Q555	Rnf213 Mystr
TRINITY_DN1221_c0_g1	-0.395976	-0.183316	-0.140717	-0.312506	0.89593	Q9DBF1	Aldh7a1 Ald7a1
TRINITY_DN12211_c0_g1	1.32392	2.94346	2.54061	0.737623	0.603987	Q62210	Birc2
TRINITY_DN12216_c0_g1	-5.7049	-0.976247	0.062507	1.48815	0.16533	P21956	Mfge8
TRINITY_DN12217_c0_g1	-0.816165	-0.952992	-0.929024	-0.772958	0.016174	Q7TPE5	Slc7a6os
TRINITY_DN12217_c1_g1	1.09152	0.602773	0.311165	0.488513	0.171541	Q9DB77	Uqcrc2
TRINITY_DN12218_c0_g1	3.07232	2.49656	1.50913	0.969921	0.000158958	Q8BK48	Ces2e Ces5
TRINITY_DN1222_c0_g1	-0.761292	-1.01728	-0.716818	-0.969708	0.451222	Q8BM47	Plekhm3 Dapr
TRINITY_DN1222_c0_g2	-0.722861	-0.870483	-0.669471	-1.07807	0.567424	Q7TSI1	Plekhm1
TRINITY_DN12222_c0_g1	-2.67907	-1.80139	-0.682494	-1.58138	0.738078	Q80YX1	Tnc Hxb
TRINITY_DN12222_c1_g2	-0.154242	1.14696	-1.64491	-0.850897	0.443762	A2AV25	Fibcd1
TRINITY_DN12224_c0_g1	0.946807	0.0894072	0.168399	0.526525	0.511065	A2APB8	Tpx2
TRINITY_DN12226_c3_g1	-5.17123	-0.46586	-0.304399	-0.525206	0.781531	Q9JHE4	Gal3st1 Cst Gcst
TRINITY_DN12227_c0_g1	-1.78881	0.0568791	-1.05513	0.426158	0.526139	A2AV25	Fibcd1
TRINITY_DN12227_c0_g2	1.12244	0.814113	-0.253101	-0.13821	0.876752	A2AV25	Fibcd1
TRINITY_DN12229_c0_g1	6.87733	2.72189	0.545833	3.91868	2.37298e-11	P20918	Plg
TRINITY_DN1223_c0_g1	-2.1932	-0.655334	-1.00397	-1.68067	0.0718664	Q6Q899	Ddx58
TRINITY_DN1223_c0_g2	-1.21225	-0.31206	0.174467	0.0110909	0.297355	Q8R5F7	Ifih1
TRINITY_DN12233_c0_g1	-0.158709	-0.309071	-0.747568	-0.357769	0.552516	Q9D9G3	Chic2
TRINITY_DN12234_c0_g1	-2.23578	-3.51173	-6.32449	-5.1191	0.00177568	A2AX52	Col6a4 Dvwa
TRINITY_DN12237_c0_g1	-0.0716859	-0.111616	-0.192438	0.136819	0.865977	Q9R1K5	Fzr1 Fyr Fzr
TRINITY_DN1224_c0_g1	0.0975157	-0.0786398	-0.162532	-0.421855	0.53856	Q8BT60	Cpne3 Kiaa0636
TRINITY_DN12248_c0_g1	1.12333	2.38093	2.42644	2.80053	0.00322158	Q8K2Q2	Gsto2
TRINITY_DN12249_c0_g1	-0.148225	0.530255	0.145645	0.119648	0.582192	Q60803	Traf3 Craf1 Trafamn
TRINITY_DN1225_c0_g1	2.33417	1.35428	1.32126	1.57445	0.000828123	Q9D0N7	Chaf1b
TRINITY_DN12251_c0_g1	-1.2851	0.279587	0.515656	0.385132	0.742127	Q9EQY0	Ern1 Ire1
TRINITY_DN12251_c1_g1	-2.64362	-1.03393	0.693545	1.02862	0.419912	P51954	Nek1
TRINITY_DN12253_c0_g1	-1.14186	0.124049	-0.140835	0.032177	0.357946	P56677	St14 Prss14
TRINITY_DN12253_c1_g2	0.221663	-0.157983	0.109426	-0.0323265	0.933795	Q8BUY9	Pggt1b
TRINITY_DN12256_c0_g1	-0.639679	-0.114011	-0.0661557	-0.751992	0.12881	Q8VEK6	Ing3
TRINITY_DN1226_c0_g1	-0.847126	-0.829709	0.307239	0.527076	0.26565	Q9D023	Mpc2 Brp44
TRINITY_DN122665_c0_g1	0.245315	0.219616	0.700589	0.563511	0.326023	P14404	Mecom Evi1 Mds1 Prdm3
TRINITY_DN12267_c0_g1	-0.28621	0.492571	0.00849797	-0.10651	0.0940694	Q810B7	Slitrk5
TRINITY_DN12267_c0_g2	0.165845	0.566977	-0.726637	-0.230354	0.552516	Q810B9	Slitrk3
TRINITY_DN12268_c0_g1	-0.288294	-0.49486	-0.991344	-1.34812	0.875218	Q8R1G2	Cmbl
TRINITY_DN12275_c0_g2	-0.106042	-0.32825	-0.416944	-0.662062	0.16895	Q91Y44	Brdt Fsrg3
TRINITY_DN12279_c0_g1	-0.293456	-0.518801	-0.293734	0.387628	#N/A	Q6ZQ88	Kdm1a Aof2 Kiaa0601 Lsd1
TRINITY_DN12281_c0_g1	0.247783	-0.609118	-0.435925	-0.228711	0.358823	Q8BTY8	Scfd2 Stxbp1l1
TRINITY_DN12287_c0_g2	-0.10222	-0.517055	-0.478953	-0.120689	0.450839	Q9WUH1	Tmem115 Pl6
TRINITY_DN122962_c0_g1	-1.55362	-2.11594	0.588509	-0.250036	0.761362	Q61554	Fbn1 Fbn-1
TRINITY_DN12297_c0_g2	-2.31134	0.375883	-0.340796	-0.388541	2.93498e-06	Q80TR1	Adgrl1 Kiaa0821 Lec2 Lphn1
TRINITY_DN12298_c0_g1	1.76873	0.424469	0.604939	1.07267	0.0284026	O08901	Bub1
TRINITY_DN1230_c0_g1	1.07844	0.505226	-0.507569	0.457859	0.120832	Q60597	Ogdh Kiaa4192
TRINITY_DN12301_c0_g1	-1.08833	-0.530929	-0.432383	-0.507765	0.135484	Q8BHK3	Slc36a2 Pat2 Tramd1
TRINITY_DN12305_c0_g1	-22.2741	1.32851	-24.2569	-22.0593	0.372285	P97864	Casp7 Lice2 Mch3
TRINITY_DN12309_c0_g2	-1.043	3.67247	-0.711971	5.08631	#N/A	Q9EQY0	Ern1 Ire1
TRINITY_DN12314_c0_g1	8.12003	5.42674	2.50445	5.94964	1.30041e-05	Q8C767	Ppp1r3b Ppp1r4
TRINITY_DN12315_c0_g1	1.29004	0.00142184	0.29949	0.932504	0.436446	P61406	Smg6 Est1a Kiaa0732
TRINITY_DN12316_c0_g1	-1.518	-0.717891	-1.11849	-0.648753	0.385431	Q9ET38	Cldn19
TRINITY_DN12316_c0_g2	-1.65182	-0.828881	-1.37044	-0.701669	0.28225	Q9ET38	Cldn19
TRINITY_DN12318_c0_g1	4.18246	0.113334	-1.68414	1.3409	0.00573108	Q91ZR5	Catsper1
TRINITY_DN12319_c0_g1	1.66928	0.377881	1.20261	0.171295	0.0531826	Q9CPW9	Metap1d Map1d Metapl1 Mnpepl
TRINITY_DN1232_c0_g1	-0.00250006	-0.307159	-0.509877	-0.413699	0.720912	Q99LF4	Rtcb D10Wsu52e
TRINITY_DN1232_c0_g2	0.330715	0.186518	0.130064	0.0201333	0.934852	Q99LF4	Rtcb D10Wsu52e
TRINITY_DN12321_c0_g1	-1.19629	-2.31969	-1.19719	-0.357062	0.249334	E9Q8T7	Dnah1 Dhc7 Dnahc1
TRINITY_DN12323_c0_g1	0.0777516	1.74776	-0.59283	-1.15506	0.329432	Q640P2	Angptl1
TRINITY_DN1233_c0_g1	-0.311441	0.256475	-0.128184	-0.179705	0.840809	Q9JHJ3	Glmp
TRINITY_DN12331_c0_g1	1.3709	-0.410144	0.192381	0.999108	0.0285921	Q8CDV0	Ccdc178
TRINITY_DN12332_c0_g1	0.804656	-0.551716	-0.603841	0.803837	0.859189	P08074	Cbr2
TRINITY_DN12333_c0_g1	0.484559	-0.0920577	-0.158882	-0.0222635	0.419912	P80313	Cct7 Ccth
TRINITY_DN12336_c0_g3	-1.01801	-1.25112	-0.0601775	0.026714	0.723654	Q8BR93	Harbi1
TRINITY_DN12337_c0_g1	1.23394	-0.200784	0.789549	0.676541	0.475741	Q8C5V5	Wdr27
TRINITY_DN12338_c0_g1	1.82964	0.0552741	0.399498	0.485069	0.00663514	Q9Z2B2	Slc25a14 Bmcp1 Ucp5
TRINITY_DN12339_c0_g1	-1.42721	-2.59219	0.323311	-0.263033	0.197572	Q9JJ06	C1galt1 Plt1
TRINITY_DN1234_c0_g1	-3.24284	1.15864	1.07952	-1.7535	0.810213	P63017	Hspa8 Hsc70 Hsc73
TRINITY_DN1234_c1_g1	-5.05945	-20.492	-22.8049	0.415244	#N/A	P63017	Hspa8 Hsc70 Hsc73
TRINITY_DN1234_c2_g2	-1.04309	5.12388	6.58085	5.63416	#N/A	P63017	Hspa8 Hsc70 Hsc73
TRINITY_DN12342_c0_g1	0.345173	0.339455	0.474243	0.57556	0.797449	Q9CPU4	Mgst3
TRINITY_DN123425_c0_g1	5.11296	3.38312	-0.711971	-0.852449	#N/A	Q9WVH6	Angpt4 Agpt4 Ang3
TRINITY_DN12343_c0_g1	0.948589	1.59083	0.320096	-0.0434218	0.976948	E9Q555	Rnf213 Mystr
TRINITY_DN12346_c0_g2	-0.931658	-0.211071	-0.527915	-0.635631	0.611892	Q7TMS5	Abcg2 Abcp Bcrp1
TRINITY_DN12347_c0_g1	1.38901	-0.0127712	-0.629535	-0.729863	3.90685e-07	Q9CQG1	Chac2
TRINITY_DN12349_c0_g1	0.119384	-0.571516	-0.863669	-0.261894	0.0974545	Q8CFP6	Dnajc27 Rabj Rbj
TRINITY_DN1235_c0_g1	-0.12388	0.14864	0.781118	0.729508	0.0020414	Q3UVK0	Ermp1 D19Wsu12e Fxna Kiaa1815
TRINITY_DN12350_c0_g1	0.730775	-0.259866	-0.256391	-0.177458	0.0963817	Q9Z1J3	Nfs1 Nifs
TRINITY_DN12352_c0_g2	8.93058	5.31311	3.49556	6.46803	1.34699e-11	Q6HA09	Astl Sas1b
TRINITY_DN12355_c0_g1	-8.31372	-9.14483	-3.98958	-3.72906	0.000228975	Q9QZ28	Six6 Optx2 Six9
TRINITY_DN12368_c0_g1	-6.692	-4.25183	-1.29888	-2.21313	#N/A	Q61847	Mep1b Mep-1b
TRINITY_DN12372_c0_g1	3.23838	2.14181	2.03031	1.92581	9.82502e-07	Q64737	Gart
TRINITY_DN12374_c0_g1	-2.545	-1.14731	-1.37805	-1.09662	0.0806507	Q5PR73	Diras2
TRINITY_DN12376_c0_g1	-1.20214	-0.26891	-0.076475	-0.3227	0.0141787	Q9JI08	Bin3
TRINITY_DN1238_c0_g1	0.404636	0.0589996	0.0712362	-0.521539	0.408983	Q5NCR9	Nsrp1 Ccdc55 Nsrp70
TRINITY_DN12380_c0_g1	1.67992	1.54598	-0.250306	-1.37126	0.00947721	P01027	C3
TRINITY_DN12384_c0_g1	-0.737623	-0.783273	-0.153219	-0.0947699	0.845006	Q91VT8	Smim14
TRINITY_DN12384_c0_g2	-0.621787	-0.526552	-0.379327	-0.621248	0.659577	Q91VT8	Smim14
TRINITY_DN123843_c0_g1	0.18838	-0.859964	-2.57546	0.432285	0.661644	Q62261	Sptbn1 Elf Spnb-2 Spnb2 Sptb2
TRINITY_DN12388_c0_g1	2.16141	1.02436	1.17883	0.912305	0.00137864	Q99MV5	Mov10l1 Champ
TRINITY_DN1239_c0_g1	1.41887	1.27466	0.843779	1.29896	0.112986	Q9D7J9	Echdc3
TRINITY_DN12390_c1_g1	-0.216592	-0.44572	-0.473217	0.140662	0.876752	Q8C827	Zfp62
TRINITY_DN12392_c0_g1	0.071161	1.4313	0.0440863	0.355669	0.183688	Q5M8N4	Sdr39u1
TRINITY_DN123921_c0_g1	1.18272	-0.697053	-0.406594	0.652249	0.536324	Q9CWG1	Glipr1
TRINITY_DN123938_c0_g1	4.56097	1.52162	0.249752	2.51488	#N/A	Q80Z19	Muc2
TRINITY_DN12394_c0_g1	-2.27589	-2.20882	-0.541257	-0.209467	0.0715387	Q9D994	Wdr38
TRINITY_DN123969_c0_g1	2.27534	3.64921	2.84598	2.58212	0.270125	Q8BUB6	Ust
TRINITY_DN123977_c0_g1	4.23099	4.08659	3.79012	3.27479	0.335352	Q6P4U0	Thsd7b
TRINITY_DN12399_c0_g1	-1.94583	-1.51589	-0.246196	-0.463866	0.653502	Q0II04	Nebl Lnebl
TRINITY_DN1240_c0_g1	-0.307763	-0.266091	-0.496457	0.0111479	0.352904	Q9EQM6	Dgcr8
TRINITY_DN12409_c0_g1	0.033678	-0.974947	-0.151574	-0.391122	0.786394	Q8CDI7	Ccdc150
TRINITY_DN12412_c0_g1	0.56747	0.406602	0.0403117	0.287768	0.492988	Q68FL4	Ahcyl2
TRINITY_DN12413_c0_g1	1.89574	0.885541	0.890276	0.98651	0.0202001	Q9D0F9	Pgm1 Pgm2
TRINITY_DN124171_c0_g1	6.22389	4.32204	2.47434	6.25385	0.292331	Q9D565	Wdr64
TRINITY_DN1242_c0_g1	-2.68589	-2.47564	-1.47858	-1.29243	0.245686	Q8K3Z0	Nod2 Card15
TRINITY_DN12422_c0_g1	3.1204	4.54464	4.85382	1.31209	#N/A	Q9JI74	Klhl1
TRINITY_DN12422_c0_g3	0.418754	0.15228	0.891779	0.902618	0.872763	Q9JI74	Klhl1
TRINITY_DN12423_c0_g1	-1.96608	-3.30384	-2.24109	-1.66389	0.0398223	O70583	Mid1 Fxy Trim18
TRINITY_DN12428_c0_g1	-0.747395	-2.45644	-2.24078	-2.39066	0.018331	P08752	Gnai2 Gnai-2
TRINITY_DN1243_c0_g1	-1.82959	0.0166948	-0.212802	-1.0527	0.674711	Q01102	Selp Grmp
TRINITY_DN1243_c0_g2	-1.15884	0.991225	-0.0999292	0.34752	0.396838	Q01102	Selp Grmp
TRINITY_DN12430_c0_g1	6.74101	6.6228	6.1957	5.21921	7.46352e-05	A2AVA0	Svep1
TRINITY_DN12433_c0_g1	-0.00273171	-0.134347	-0.338041	-0.362974	0.972993	Q3T9Z9	Zup1 Zufsp
TRINITY_DN12433_c0_g2	-0.427455	-0.906234	-0.801075	-0.705024	0.641134	Q3T9Z9	Zup1 Zufsp
TRINITY_DN12435_c0_g1	7.15406	4.20626	3.22827	5.17172	2.35857e-08	A2AVA0	Svep1
TRINITY_DN12436_c0_g2	0.341979	-0.105413	-3.29086	-3.25348	0.00122819	Q9D939	Sult1c2 Sult1c1
TRINITY_DN12437_c0_g1	-0.427002	0.491775	1.11175	1.07248	0.094213	Q9EQD0	Fzd5
TRINITY_DN12438_c0_g1	-0.659769	-0.834636	-0.175739	-0.13454	0.947722	Q09324	Gcnt1
TRINITY_DN12439_c0_g1	2.7728	5.19595	3.84097	4.21415	0.0313342	Q99LL3	Chst12
TRINITY_DN1244_c0_g1	-2.01421	-1.49002	-0.237583	0.0162374	0.000536149	Q8CHB8	Ttll5 Kiaa0998
TRINITY_DN1244_c0_g2	-1.84476	-1.67986	-0.364187	0.191238	0.00869474	Q8CHB8	Ttll5 Kiaa0998
TRINITY_DN124412_c0_g1	-6.93355	-9.44965	-5.72387	-9.45427	0.404949	E9Q555	Rnf213 Mystr
TRINITY_DN12442_c0_g1	-0.0332705	-0.208368	-0.031383	-0.190472	0.978117	P31649	Slc6a13 Gabt2 Gabt3 Gat-3 Gat2 Gat3
TRINITY_DN12442_c1_g1	-1.44478	-1.47257	0.0945913	-0.899216	0.0354864	Q61762	Kcna5
TRINITY_DN12446_c0_g1	-1.71533	-0.755337	-0.0417742	0.331157	0.67333	Q8C3F7	Klhl30
TRINITY_DN12446_c0_g2	-2.19825	-1.85664	-1.37683	-0.194724	0.782085	A2AAX3	Klhl15
TRINITY_DN12446_c1_g1	-2.12869	0.415666	2.52454	-0.097285	0.283075	Q9D5V2	Klhl10
TRINITY_DN12447_c0_g3	-2.76328	-0.00479749	0.148064	0.22726	0.666946	D3YZI9	Pgbd5
TRINITY_DN12449_c0_g1	-2.92468	0.230693	-0.621273	0.944768	0.717805	Q61084	Map3k3 Mekk3
TRINITY_DN1245_c0_g1	4.47847	3.5278	3.50021	3.07602	9.23317e-05	Q9CR48	Dram2 Tmem77
TRINITY_DN12450_c0_g1	-0.969462	-0.146042	0.217705	-1.14936	0.65248	Q80WQ9	Zbed4 Kiaa0637
TRINITY_DN12451_c0_g1	-0.430869	2.00274	0.258353	0.0958758	0.217769	P39038	Cdh4
TRINITY_DN12457_c0_g1	-2.09163	-1.57266	-0.948831	-0.157807	0.42758	Q9CR35	Ctrb1
TRINITY_DN12458_c0_g1	-0.107666	-0.341152	-0.35421	-0.184893	0.56508	Q99MR6	Srrt Ars2 Asr2
TRINITY_DN1246_c0_g1	0.507742	0.229952	-0.0149012	0.078525	0.226457	P47754	Capza2 Cappa2
TRINITY_DN12461_c0_g1	-1.4023	-0.202575	0.917142	-0.206092	0.689743	Q6PDK8	Dtx4
TRINITY_DN12461_c0_g2	5.63616	7.83395	6.67021	7.07925	0.800552	Q8R3P2	Dtx2
TRINITY_DN12463_c0_g1	10.8258	7.90198	3.73741	7.59749	3.77935e-06	Q8CA95	Pde10a
TRINITY_DN12464_c1_g1	-0.465684	-1.29422	0.860732	1.25213	0.272077	O88819	Fut9
TRINITY_DN12465_c0_g1	-0.0762249	0.226369	0.711494	0.168976	0.585923	Q9Z1J2	Nek4 Stk2
TRINITY_DN12467_c0_g1	0.410104	-0.0625111	0.326796	0.298925	0.876752	Q9CWF6	Bbs2
TRINITY_DN124699_c0_g1	-3.251	-3.05583	1.44053	2.482	#N/A	P63017	Hspa8 Hsc70 Hsc73
TRINITY_DN1247_c0_g3	0.411592	0.0938058	0.044434	-0.041132	0.62975	Q499X9	Mars2
TRINITY_DN12470_c0_g1	-0.195596	-0.583333	-0.767566	-0.306439	0.148995	Q6ZPU9	Kifbp Kbp Kiaa1279 Kif1bp
TRINITY_DN12474_c2_g1	0.718106	0.110905	-0.0934168	0.270149	0.342222	P52431	Pold1
TRINITY_DN12475_c1_g1	0.114568	-0.119825	-0.138821	0.144657	0.915994	Q8VEL2	Mtmr14
TRINITY_DN12479_c0_g1	0.058585	0.46467	0.561894	0.752216	0.608009	P47199	Cryz
TRINITY_DN12479_c0_g2	-0.302527	-0.183571	0.484599	0.0361174	0.851825	P11369	Pol Gm17492
TRINITY_DN1248_c0_g1	0.121886	0.381963	0.272712	0.294332	0.989692	Q61006	Musk Nsk2
TRINITY_DN12480_c0_g2	-7.20149	-3.40996	-0.870596	-1.72523	0.0434497	Q60710	Samhd1 Mg21
TRINITY_DN12483_c0_g1	1.24452	0.526493	0.468218	0.521473	0.298194	Q9R1P0	Psma4
TRINITY_DN124835_c0_g1	0.36875	1.06513	0.0105694	1.14638	0.872909	Q8BW75	Maob
TRINITY_DN124841_c0_g1	-3.1685	-0.55724	1.44893	-1.25475	0.0802572	Q7TMS5	Abcg2 Abcp Bcrp1
TRINITY_DN124845_c0_g1	0.138612	2.46887	-0.00727367	0.787666	0.426698	Q8BUB6	Ust
TRINITY_DN12485_c0_g1	1.80942	1.73273	1.8223	1.47588	0.01866	Q8VCH7	Rdh10
TRINITY_DN1249_c0_g1	1.54116	1.49615	2.27054	1.75277	7.66446e-07	O08528	Hk2
TRINITY_DN12495_c0_g2	-1.04299	1.598	2.99596	3.75274	#N/A	Q8BQN6	Znf146 Ozf Zfp146
TRINITY_DN12498_c0_g1	-3.04894	-1.07491	-1.02241	-1.07476	0.326591	Q9EQY0	Ern1 Ire1
TRINITY_DN12498_c0_g3	-7.45898	-5.83121	1.3776	1.04623	0.00178656	Q9EQY0	Ern1 Ire1
TRINITY_DN125_c0_g1	0.287541	2.15671	2.86847	2.71126	0.00586224	Q2TPA8	Hsdl2
TRINITY_DN125_c1_g1	1.17791	1.28061	1.22234	1.05103	0.298194	P08074	Cbr2
TRINITY_DN125_c2_g1	0.36681	1.15042	1.38345	0.875183	0.736905	Q8R090	Slc18a1 Vmat1
TRINITY_DN1250_c0_g1	0.952246	-0.15906	-0.0936518	-0.19507	0.182738	O88379	Baz1a Cbp146
TRINITY_DN1250_c0_g2	1.10625	0.957356	0.739215	0.325188	0.00992799	O88379	Baz1a Cbp146
TRINITY_DN12500_c0_g1	6.28977	5.17089	4.57688	5.65925	0.014495	Q8VCF1	Cant1
TRINITY_DN12500_c0_g2	8.47814	6.19715	6.68976	7.06724	0.0558821	Q8VCF1	Cant1
TRINITY_DN12501_c0_g1	-0.646569	-0.346337	0.51818	-0.150407	0.187403	Q91WR8	Gpx6
TRINITY_DN12503_c0_g1	-0.776029	0.13054	0.118323	-0.402613	0.64719	Q9QYB2	Dach1 Dach
TRINITY_DN12504_c0_g1	1.41851	0.487369	0.565307	0.63042	0.146899	Q8VEM8	Slc25a3
TRINITY_DN1251_c0_g1	-0.198926	-0.311714	-0.537958	-0.530504	0.832732	Q9CQ61	Unc50
TRINITY_DN12510_c0_g1	-5.12532	0.496238	0.663686	1.02428	0.76938	P16332	Mmut Mut
TRINITY_DN12514_c0_g1	0.0555325	0.685717	-1.38331	1.31626	0.913615	B2RX14	Tut4 Kiaa0191 Zcchc11
TRINITY_DN12514_c1_g1	0.0215017	-0.047764	-0.38795	-2.63276	0.709001	B2RX14	Tut4 Kiaa0191 Zcchc11
TRINITY_DN12518_c0_g1	-0.655458	-3.04469	-1.08111	-2.54236	0.0167428	P63017	Hspa8 Hsc70 Hsc73
TRINITY_DN1252_c0_g1	0.280897	0.01355	0.244539	0.385726	0.809681	O35648	Cetn3 Cen3
TRINITY_DN12520_c0_g1	-1.13231	-1.43594	-0.775315	-0.213767	0.823848	Q8R242	Ctbs
TRINITY_DN125238_c0_g1	0.202242	0.199447	0.242667	0.135357	0.967068	P70288	Hdac2 Yy1bp
TRINITY_DN12526_c0_g1	1.97948	2.49959	3.58327	2.00882	0.000210025	Q61838	Pzp A2m
TRINITY_DN12529_c0_g1	1.6267	0.26576	0.294507	0.154858	9.71711e-06	Q9D0R4	Ddx56 D11Ertd619e Noh61
TRINITY_DN1253_c0_g1	0.210778	0.0898109	0.249257	0.0275427	0.969871	Q6P9L4	Usp49
TRINITY_DN1254_c0_g1	0.215129	0.0824924	0.0441005	0.142189	0.937046	Q9QWV4	Mlf1 Hls7
TRINITY_DN12542_c1_g1	5.55749	1.24906	1.80088	2.68398	2.3942e-06	Q9DAG5	Stpg4
TRINITY_DN12543_c0_g1	-0.832146	-0.667181	3.74818	2.95747	0.277002	Q9CZR2	Naalad2
TRINITY_DN12547_c0_g1	5.79248	3.3377	1.56438	3.43646	4.16254e-06	Q60848	Hells Lsh Pasg
TRINITY_DN1255_c0_g1	0.416046	-0.163665	0.309899	-0.453431	0.64812	Q64105	Spr
TRINITY_DN12551_c0_g1	-4.53762	1.11186	2.20518	1.86783	0.00050484	Q91YH5	Atl3
TRINITY_DN12551_c1_g1	-3.33899	-3.14383	0.468274	1.0428	#N/A	Q6PA06	Atl2 Arl6ip2
TRINITY_DN12552_c0_g1	7.30527	4.91466	3.44383	6.03204	0.0915385	Q6ZWY9	H2bc4 Hist1h2bc; H2bc6 Hist1h2be; H2bc8 Hist1h2bg
TRINITY_DN12553_c0_g1	-2.66713	-0.538737	-0.940447	-0.718061	0.125614	Q9Z0E8	Slc22a5 Octn2
TRINITY_DN12559_c0_g1	0.265859	0.235183	0.0620077	0.406355	0.797665	Q8BMN4	Lmln
TRINITY_DN1256_c0_g1	-0.31352	0.436842	0.470362	0.28533	0.0120353	O54879	Hmgb3 Hmg2a Hmg4
TRINITY_DN12565_c0_g1	-1.61716	-1.70032	-0.335921	0.30705	0.229227	Q9Z0F5	Ch25h
TRINITY_DN12566_c0_g1	1.7192	0.441819	0.351664	0.494253	0.00137937	Q9Z2I9	Sucla2
TRINITY_DN12568_c0_g1	-0.705498	-0.385472	0.443316	0.179507	0.460372	Q80TN7	Nav3 Kiaa0938 Pomfil1
TRINITY_DN1257_c0_g1	-0.69887	-0.479525	-0.753103	-0.499966	0.0938062	Q62415	Ppp1r13b Aspp1
TRINITY_DN1257_c0_g2	-0.616135	-0.389445	-0.670235	-0.558225	0.0112974	Q60737	Csnk2a1 Ckiia
TRINITY_DN12573_c0_g1	0.74583	0.280178	0.56709	0.413878	0.359692	Q9D270	Zdhhc21 Gramp3
TRINITY_DN12575_c0_g1	-1.0222	-1.31216	0.576086	0.856724	0.0322246	A4Q9F6	Ttll13
TRINITY_DN125761_c0_g1	-0.113436	-0.81746	-0.244722	-2.52808	0.522045	P47750	Tshr
TRINITY_DN12579_c1_g1	-1.31975	-0.044495	-0.673095	-2.32255	0.576455	P70338	Gfi1 Gfi-1
TRINITY_DN125797_c0_g1	-0.337932	0.109122	1.40467	0.531489	0.111299	Q9D2G9	Hhipl2 Hhip3 Kiaa1822l
TRINITY_DN1258_c0_g1	1.77066	0.521059	0.640319	0.903937	0.00268898	Q9CZH8	Ccdc77
TRINITY_DN1258_c0_g2	-1.66171	-0.432884	0.124667	0.526131	0.608009	Q80WQ9	Zbed4 Kiaa0637
TRINITY_DN12581_c0_g2	-0.228582	-0.285175	-0.197981	-0.173308	0.978117	Q924Z6	Xpo6 Ranbp20
TRINITY_DN12588_c0_g1	-0.597888	-0.368256	-0.176505	-0.167658	0.989049	Q8C6E0	Cfap36 Ccdc104
TRINITY_DN12595_c0_g1	0.525807	-0.62094	1.11374	1.14871	0.523334	Q9WV55	Vapa Vap33
TRINITY_DN125953_c0_g1	-3.57304	-1.3043	-0.234486	-0.251266	#N/A	P0C6A1	Slc2a7
TRINITY_DN12598_c0_g1	-0.908149	1.30394	1.27117	0.716547	0.000181375	Q9D8I1	Mzb1 Pacap
TRINITY_DN126_c0_g1	1.32199	0.0302248	-0.0982987	0.0217656	0.0157536	P70279	Surf6 Surf-6
TRINITY_DN1260_c0_g1	0.0182932	-0.0792118	3.65842	1.19369	9.70045e-06	Q2PZL6	Fat4 Fatj
TRINITY_DN1260_c0_g2	-3.36406	-0.894675	-0.315864	-1.08591	1.27986e-09	Q8BNA6	Fat3 Gm1132 Gm510
TRINITY_DN1261_c0_g1	0.339656	0.204609	-0.207167	-0.227819	0.280309	Q8BKG3	Ptk7
TRINITY_DN12611_c0_g1	0.235498	0.101827	-0.158917	-0.29414	0.789723	Q9Z1J2	Nek4 Stk2
TRINITY_DN12615_c0_g1	1.13621	0.302484	0.182936	0.336359	0.0811726	P10518	Alad Lv
TRINITY_DN126184_c1_g1	-0.626127	0.178013	1.90791	0.907308	0.871166	Q8BH66	Atl1 Spg3a
TRINITY_DN1262_c0_g1	-1.91193	-0.809216	-0.419004	-0.75237	0.000508192	Q6ZWQ0	Syne2
TRINITY_DN12620_c0_g1	-1.78044	-0.853631	-0.371667	-0.182906	0.293222	Q99PF4	Cdh23
TRINITY_DN12623_c0_g1	9.23435	4.60379	-0.711944	5.48216	2.63142e-05	P54731	Faf1
TRINITY_DN12627_c0_g1	-0.239769	0.115098	-0.479681	-0.815879	0.810672	Q505G8	Znf827 Zfp827
TRINITY_DN1263_c0_g1	0.00379872	-0.53279	-0.159925	-0.762317	0.82667	Q3V0T4	Itgad
TRINITY_DN12630_c0_g1	-3.57262	-0.486431	-0.398611	0.560518	0.131288	Q80Z71	Tnn Tnw
TRINITY_DN12632_c0_g1	-0.951926	-0.698749	-0.914898	-1.06992	2.56609e-05	Q9D658	Ptp4a3 Prl3
TRINITY_DN12632_c1_g1	0.683416	0.799491	1.92059	1.48585	0.0253909	P15620	Znf271 Zfp-35 Zfp35
TRINITY_DN12632_c1_g2	-0.730007	-0.46759	-1.25172	-0.648697	0.663145	Q6P549	Inppl1 Ship2
TRINITY_DN12636_c0_g1	-5.76483	-7.28754	-0.24219	-0.659318	0.0236552	Q66K08	Cilp
TRINITY_DN12637_c0_g1	1.46662	2.49518	2.60531	2.25618	0.198193	P50171	Hsd17b8 H2-Ke6 Hke6
TRINITY_DN12638_c0_g1	4.14858	1.7242	0.504941	1.24871	0.0682779	Q812G0	Mgat4a
TRINITY_DN1264_c0_g1	-0.547037	-0.267392	-0.193364	-0.409443	0.856498	Q60575	Kif1b
TRINITY_DN12640_c0_g1	3.74288	3.9295	1.14498	1.33384	#N/A	P10078	Zfp28 Mkr5 Zfp-28
TRINITY_DN12640_c0_g2	3.76114	2.96657	1.55162	2.24279	0.000722603	P15620	Znf271 Zfp-35 Zfp35
TRINITY_DN12640_c1_g1	3.27141	2.40875	2.35372	2.02996	0.426977	Q80V23	Znf32 Zfp637
TRINITY_DN12641_c0_g1	-1.292	-0.668677	-0.876835	-2.20761	0.41753	P11369	Pol Gm17492
TRINITY_DN126437_c0_g2	-3.05225	-1.27186	1.34235	1.88811	1.10182e-05	Q9DAQ5	0
TRINITY_DN12648_c0_g1	-0.335326	0.946911	1.44391	2.38208	0.492686	Q9CR40	Klhl28 Btbd5
TRINITY_DN126487_c0_g1	0.590287	0.817694	1.12554	0.0293647	#N/A	Q9CR40	Klhl28 Btbd5
TRINITY_DN126498_c0_g1	-4.86602	-1.14165	0.934085	0.452057	#N/A	E9Q555	Rnf213 Mystr
TRINITY_DN126498_c0_g2	0.373362	-5.10437	-0.89059	0.271193	#N/A	E9Q555	Rnf213 Mystr
TRINITY_DN12650_c0_g1	-1.06301	-0.27107	-0.689882	0.40262	0.515973	Q8VDD8	Washc1 Orf19 Wash Wash1
TRINITY_DN12653_c0_g1	-2.6295	-0.0716583	0.81361	1.31063	0.288285	Q62261	Sptbn1 Elf Spnb-2 Spnb2 Sptb2
TRINITY_DN12655_c0_g1	-0.193361	-0.365131	-0.404314	-0.411967	0.688074	O88351	Ikbkb Ikkb
TRINITY_DN12657_c0_g1	0.660734	-0.575103	-0.290297	-0.521968	#N/A	Q91WU5	As3mt Cyt19
TRINITY_DN12658_c0_g2	0.383272	-1.81105	-1.18832	-2.14388	#N/A	P70665	Siae Ysg2
TRINITY_DN12659_c0_g1	-3.34142	-1.31552	-0.694174	-1.30081	0.563347	O08914	Faah Faah1
TRINITY_DN12660_c0_g1	-1.96062	-2.51287	-1.3029	-1.4681	0.0720565	Q60736	Zp3r Sp56
TRINITY_DN126667_c0_g1	-0.783215	0.648789	-0.0485556	0.840322	0.837797	Q8BZM0	Klhl12 C3ip1
TRINITY_DN126676_c0_g1	-2.65975	-2.19839	-1.20002	-1.03123	0.557725	Q8R4G0	Ntng1 Kiaa0976 Lmnt1
TRINITY_DN1267_c0_g1	1.33473	0.277252	-0.00623745	0.25692	0.000686811	P61222	Abce1 Rli
TRINITY_DN12679_c0_g1	4.11601	7.58836	3.4529	-0.852514	0.553033	Q61084	Map3k3 Mekk3
TRINITY_DN1268_c0_g1	-0.237925	-0.343077	-0.518187	-0.861474	0.0631188	Q8BIK4	Dock9 D14Wsu89e Kiaa1058 Ziz1
TRINITY_DN126833_c0_g1	-4.4964	1.03938	-0.696719	2.46274	0.444454	Q8BH66	Atl1 Spg3a
TRINITY_DN12685_c1_g3	0.217455	-0.355585	-0.169726	0.259256	0.746161	Q8BH79	Ano10 Tmem16k
TRINITY_DN12685_c2_g1	-0.473798	-0.774281	-0.874181	-1.10536	0.4633	Q9D1Q1	Mphosph6
TRINITY_DN1269_c0_g1	0.122699	0.0192069	0.315695	-0.198384	0.813764	P31938	Map2k1 Mek1 Prkmk1
TRINITY_DN12690_c0_g1	0.488558	0.0791833	-0.018255	0.791435	0.364475	Q5SUR0	Pfas Kiaa0361
TRINITY_DN12692_c0_g2	-1.47157	-0.664399	-0.196948	-0.520987	0.242238	Q64731	Foxl1 Fkh6 Fkhl11
TRINITY_DN12694_c0_g2	0.737878	1.15832	0.68222	0.847603	0.472361	Q99JT1	Gatb Pet112 Pet112l
TRINITY_DN12695_c0_g1	0.014644	0.506611	0.847092	0.710205	0.270176	Q9DBW0	Cyp4v2 Cyp4v3
TRINITY_DN12696_c0_g1	0.326961	-0.930363	0.0852853	0.614484	0.751024	A2AC93	Dnai2 Dnaic2
TRINITY_DN12703_c0_g1	0.062556	-0.160279	-1.18543	-1.11145	0.433328	Q8BYR1	Lcmt2 Kiaa0547 Tyw4
TRINITY_DN12706_c0_g1	1.25418	0.402184	0.257677	0.186716	0.0989677	Q7TMY4	Thoc7 Nif3l1bp1
TRINITY_DN12708_c0_g1	0.812361	0.352165	0.411924	0.790786	0.383376	Q61102	Abcb7 Abc7
TRINITY_DN12709_c0_g1	0.346742	-0.788784	-0.749236	-0.557207	0.0516369	Q99LH1	Gnl2
TRINITY_DN1271_c0_g1	0.566565	0.487632	0.948169	1.06494	0.0194294	P41216	Acsl1 Acsl2 Facl2
TRINITY_DN1271_c1_g1	-0.505393	-0.545446	-0.910902	-1.0355	0.435234	P61021	Rab5b
TRINITY_DN1272_c0_g1	-0.333537	-0.463659	-0.132745	-0.24368	0.484461	Q9DBL7	Coasy Ukr1
TRINITY_DN12720_c0_g1	-0.688858	-0.37331	-0.31917	-0.695117	0.535381	A6H8H2	Dennd4c
TRINITY_DN12721_c0_g1	8.85123	6.66951	4.80165	6.31731	1.93932e-05	Q60864	Stip1
TRINITY_DN12723_c0_g1	0.363367	0.215148	0.302039	0.185129	0.867859	P42208	Septin2 Nedd5 Sept2
TRINITY_DN12724_c0_g1	-2.62799	0.424544	0.225821	-1.8403	0.0115232	O70497	Fcn2 Fcnb
TRINITY_DN12726_c0_g1	-1.57359	-3.32127	-2.11838	-1.29802	0.0961169	Q62463	Avpr1a
TRINITY_DN12727_c0_g1	-0.020809	-0.292323	-0.366406	0.0115113	0.863745	Q8R2U6	Nudt4 Dipp2
TRINITY_DN12728_c0_g1	0.771254	-0.371435	-0.252281	-0.0777112	0.0077443	P35564	Canx
TRINITY_DN1273_c0_g1	0.380253	0.204241	0.446802	0.137256	0.887796	Q8BGT6	Micall1 D15Mit260 Kiaa1668 Mirab13
TRINITY_DN127369_c0_g1	0.491359	-0.0803911	0.411045	0.566244	0.937519	Q8BH16	Fbxl2
TRINITY_DN1274_c0_g1	0.251171	0.650582	0.243296	0.366917	0.627244	O35887	Calu
TRINITY_DN12744_c0_g1	-2.029	0.455158	0.207127	0.452145	0.141948	Q62231	Six1
TRINITY_DN12745_c0_g1	0.470212	-0.0788272	0.23978	0.526487	0.933359	Q9CQC4	Tmem216
TRINITY_DN127475_c0_g1	-4.95409	-0.453494	-0.2358	-1.80137	0.194039	Q9QXH4	Itgax
TRINITY_DN12752_c0_g1	-5.3161	-3.90681	-1.0608	-1.22855	0.00160398	Q61554	Fbn1 Fbn-1
TRINITY_DN12754_c0_g1	-0.760376	-1.44422	-0.00398945	-0.230759	0.71275	P11369	Pol Gm17492
TRINITY_DN12763_c0_g1	0.0321331	0.592143	0.578995	0.11041	0.933568	Q3UJZ3	Armc7
TRINITY_DN12765_c0_g1	0.0043603	0.0364389	0.703533	-0.477273	0.885859	O08914	Faah Faah1
TRINITY_DN1277_c0_g1	3.69602	1.58721	0.970801	1.61824	1.30849e-07	Q8VI84	Noc3l Ad24 Fad24
TRINITY_DN127782_c0_g1	0.618498	1.04385	1.39407	1.06178	0.0466956	P39688	Fyn
TRINITY_DN12781_c0_g1	-4.74002	-1.51392	-1.27707	-0.999554	4.71823e-06	Q80T41	Gabbr2 Gm425 Gpr51
TRINITY_DN12782_c0_g1	3.97421	3.7612	1.20323	1.93793	0.540969	Q9Z2E3	Ern2 Ire2
TRINITY_DN12782_c0_g2	1.23835	0.0655298	0.470266	0.344634	0.646027	Q9EQY0	Ern1 Ire1
TRINITY_DN12785_c0_g1	0.894617	0.487018	0.184929	0.145448	0.136358	Q3V124	Eid3
TRINITY_DN12786_c0_g1	-0.966352	-0.0427021	0.216625	-0.454682	0.481135	Q8BIG4	Fbxo28 D1Ertd578e Kiaa0483
TRINITY_DN12788_c0_g1	-3.55005	-0.216807	1.13423	1.26487	3.66126e-08	Q7TPW1	Nexn
TRINITY_DN127882_c0_g1	-3.99443	-2.50198	-1.53412	-2.75828	0.410287	Q80WM7	Prss33
TRINITY_DN1279_c0_g1	-0.0705684	0.23606	0.606946	0.710563	0.672064	Q8CFW7	Cc2d2a
TRINITY_DN12795_c0_g1	-0.691671	-1.28001	-0.708803	-0.271979	0.328832	Q3UZ57	Axdnd1
TRINITY_DN128_c0_g1	-0.616761	-0.618002	-0.620502	-0.651005	0.292984	Q6PAR0	Klhdc10 Kiaa0265
TRINITY_DN1280_c0_g1	0.916059	0.497454	0.661487	1.00175	0.235177	Q62036	Cep131 Az1 Azi Azi1
TRINITY_DN12800_c0_g1	-2.71635	0.133372	0.116155	0.270698	0.0311261	Q8VHR0	Pcdh18 Kiaa1562
TRINITY_DN128030_c0_g1	-1.80486	0.132487	-0.0210516	-4.2519	#N/A	Q5SNZ0	Ccdc88a Grdn Kiaa1212
TRINITY_DN12804_c0_g1	-2.4565	-1.54301	-1.04869	-0.944853	0.132207	Q9JII6	Akr1a1 Akr1a4
TRINITY_DN12806_c0_g1	-1.71644	0.222207	-0.178886	-0.563679	0.98932	Q8BYI9	Tnr
TRINITY_DN12807_c0_g1	-0.0346653	0.509462	2.08523	0.889352	0.0285721	Q3UFY7	Nt5c3b Nt5c3l
TRINITY_DN12809_c0_g1	-1.7174	-0.866841	-1.47534	-1.20378	0.505345	B2RU80	Ptprb
TRINITY_DN12811_c0_g1	-3.17543	-0.501631	1.02641	-1.93563	0.00427794	Q80VI1	Trim56
TRINITY_DN128116_c0_g1	-0.175093	-0.0261222	0.573469	0.0672928	0.460265	P81270	Erg Erg-3
TRINITY_DN12812_c0_g1	-1.37081	-0.284463	-0.613028	-0.540976	0.0598161	Q8C7D2	Crbn
TRINITY_DN12813_c0_g1	-1.67383	-1.44039	-0.0267373	-1.44063	0.455102	Q9CZE3	Rab32
TRINITY_DN12814_c0_g1	-1.95567	-1.5314	-1.23007	-0.899776	0.20603	P48545	Kcnj5 Girk4
TRINITY_DN1282_c0_g1	-0.323095	-0.202813	-0.336048	-0.435789	0.765614	Q3UHC7	Dab2ip Kiaa1743
TRINITY_DN12822_c0_g1	2.18398	1.51604	1.44876	1.94111	0.000797552	O08696	Foxm1 Fkh16
TRINITY_DN128221_c0_g1	-2.27713	2.47132	0.2534	-0.749927	0.605692	Q3UHB1	Nt5dc3 Gnn
TRINITY_DN1283_c0_g1	-0.20081	-0.557754	-0.769976	-0.795376	0.139431	P0DPB4	Schip1
TRINITY_DN12833_c0_g1	-2.03093	-2.67002	-2.20046	-3.43214	0.24242	Q61554	Fbn1 Fbn-1
TRINITY_DN12834_c0_g1	-7.28345	-7.08828	-2.64633	-7.0929	0.584753	Q8VHE6	Dnah5 Dnahc5
TRINITY_DN12836_c0_g1	2.39872	1.11718	1.21306	-1.11674	0.0434497	Q9Z0E8	Slc22a5 Octn2
TRINITY_DN12839_c0_g1	-0.517879	-0.0706302	-0.072062	0.34005	0.975922	P05555	Itgam
TRINITY_DN1284_c0_g1	0.808068	0.0814613	0.193796	0.292829	0.649721	Q61188	Ezh2 Enx1h
TRINITY_DN12840_c0_g1	-5.40897	-4.38806	-1.05763	-0.305938	0.00121416	Q14BP6	Lrrc74b
TRINITY_DN12842_c1_g1	-2.75345	2.67062	1.08593	-1.44501	0.749206	Q640N1	Aebp1 Aclp
TRINITY_DN12842_c1_g2	-5.72299	-4.10698	0.372017	1.30286	0.489538	P21956	Mfge8
TRINITY_DN12842_c1_g3	-6.66637	-1.83907	-2.70976	0.834124	0.212117	P21956	Mfge8
TRINITY_DN12849_c0_g1	2.00062	2.20514	0.380037	-0.626419	4.8386e-05	Q8R3J5	Chac1 Botch
TRINITY_DN1285_c0_g1	-3.3625	0.0229053	1.42286	1.75712	4.54432e-13	Q80X72	Lrrc15
TRINITY_DN12851_c0_g1	1.76454	0.942558	0.40279	1.13939	0.00434483	Q8C735	Lin9 Bara Tgs1
TRINITY_DN128569_c0_g1	-0.759581	-2.9983	-0.882852	-0.379185	0.790417	O35386	Phyh Ln1 Lnap1 Pahx
TRINITY_DN128570_c0_g1	-1.20281	0.846165	0.755927	-0.122607	#N/A	Q3TRM4	Pnpla6 Nte
TRINITY_DN1286_c0_g1	1.3292	1.02262	0.418179	0.361791	0.150371	Q8BVI4	Qdpr Dhpr
TRINITY_DN12862_c0_g1	-0.0506143	0.503725	-0.117545	0.190091	0.889531	Q6ZQJ5	Dna2 Dna2l Kiaa0083
TRINITY_DN12864_c0_g1	0.455152	0.0868869	0.0986572	0.461915	0.563347	Q8BSF4	Pisd
TRINITY_DN12866_c0_g1	8.96113	5.48335	3.80011	6.64861	4.03103e-05	Q9CWG1	Glipr1
TRINITY_DN12868_c0_g1	-2.39797	-3.04683	-3.3611	-2.20672	0.489254	Q62521	Zic3
TRINITY_DN12869_c0_g1	-2.05192	-1.18921	-1.45971	-1.35261	4.85706e-05	Q3UJP5	0
TRINITY_DN1287_c0_g1	-0.448399	-0.255519	-0.507442	-0.462424	0.784041	Q5XPI3	Rnf123 Kpc1
TRINITY_DN12870_c0_g1	-2.49448	-1.69708	-0.0484227	-0.796746	#N/A	Q8R2P1	Klhl25 Enc2
TRINITY_DN128701_c0_g1	-0.0601035	1.99374	1.96372	1.27422	0.954828	E0CZ16	Klhl3
TRINITY_DN12871_c0_g1	-3.60675	-2.27865	-1.56455	-1.91389	0.0907525	Q9Z0E8	Slc22a5 Octn2
TRINITY_DN12876_c0_g1	3.66011	1.19195	0.235151	0.788171	1.7645e-08	Q02357	Ank1 Ank-1
TRINITY_DN12878_c0_g1	-0.818742	-0.00352735	0.0747269	-0.339648	0.870805	Q80T32	Adgrd1 Gpr133 Pgr25
TRINITY_DN1288_c0_g1	-1.07847	-0.138629	-0.476453	-0.587879	0.176406	P41233	Abca1 Abc1
TRINITY_DN12880_c0_g1	-0.576325	-0.47142	-2.2686	-1.96564	0.419028	P11369	Pol Gm17492
TRINITY_DN12881_c0_g2	-0.186899	0.00687835	0.184278	-0.117043	0.908909	P62488	Polr2g
TRINITY_DN12881_c0_g5	0.408242	-0.0123667	-0.275394	-0.0481192	0.953538	P62488	Polr2g
TRINITY_DN128810_c0_g1	-5.63366	-5.4385	0.436824	1.62072	0.0176219	P97872	Fmo5
TRINITY_DN12883_c0_g1	2.70184	1.42663	1.25995	1.58764	0.00918383	Q6PR54	Rif1
TRINITY_DN12884_c0_g1	-0.9889	-1.14959	-1.30954	-1.23291	0.279318	O70333	Cript
TRINITY_DN12885_c0_g1	-1.04104	-3.37232	-3.54157	-2.75319	0.0529096	Q8BR93	Harbi1
TRINITY_DN12886_c0_g1	-0.262286	0.850441	-0.213377	-0.00166822	0.939677	A2ARV4	Lrp2
TRINITY_DN12887_c0_g1	-0.251756	2.76438	3.22481	3.7575	2.816e-06	J3S6Y1	Tspear Tnep1
TRINITY_DN12888_c0_g1	0.115916	-1.26881	0.00112428	0.609126	0.517368	Q9CXI3	Moxd1 Dbhr Mox
TRINITY_DN12893_c0_g1	-2.40704	-3.88276	-0.822677	-3.5528	0.450948	Q80VI1	Trim56
TRINITY_DN12896_c0_g1	-0.286396	-0.191417	-0.52061	0.32247	0.721748	Q925Q5	Gpha2 Gpa2 Zsig51
TRINITY_DN129_c0_g1	-3.08831	-0.231874	0.0700343	0.251669	0.0564846	P48432	Sox2 Sox-2
TRINITY_DN1290_c0_g1	0.722799	0.289157	0.337948	0.437732	0.587224	Q8BXC6	Commd2
TRINITY_DN12900_c0_g1	0.154285	0.0224761	-0.0246724	-0.0570602	0.983846	Q9CQS4	Slc25a46
TRINITY_DN12901_c0_g1	-1.4316	0.00979803	-0.755575	-0.682942	0.565008	Q62210	Birc2
TRINITY_DN12901_c1_g1	-1.043	3.10938	-0.71197	5.46959	#N/A	Q62210	Birc2
TRINITY_DN12901_c2_g1	-6.98556	0.849498	-6.65455	-6.79501	0.386029	Q62210	Birc2
TRINITY_DN129042_c0_g1	-1.26186	2.49569	2.67951	0.998005	0.344595	Q3V1I0	Lyg2 Gm776
TRINITY_DN12908_c0_g1	0.208665	-1.32072	-0.0257499	-0.395142	0.759428	P11369	Pol Gm17492
TRINITY_DN129088_c0_g1	4.31186	2.6286	2.31684	3.18832	#N/A	P39098	Man1a2 Man1b
TRINITY_DN1291_c0_g1	-0.0975446	-0.00118423	-0.685399	-0.575779	0.0112596	Q8CFI7	Polr2b
TRINITY_DN12913_c0_g1	-1.18944	-1.58809	0.896999	-1.53881	0.5693	Q8BH66	Atl1 Spg3a
TRINITY_DN12916_c0_g1	0.967212	0.654773	0.640216	1.24883	0.808198	Q9QZX7	Srr
TRINITY_DN1292_c0_g1	-1.31073	-1.14213	-0.947625	-1.74863	0.00544603	P01027	C3
TRINITY_DN12920_c0_g1	-1.47227	-0.780824	-0.482475	0.379228	0.931362	Q8BZM0	Klhl12 C3ip1
TRINITY_DN12920_c0_g2	-2.07122	-1.05531	-6.02597	0.0277192	0.716269	Q8BZM0	Klhl12 C3ip1
TRINITY_DN12933_c0_g1	-0.0329623	-0.291384	-0.457729	-0.303835	0.572416	A6H5Z3	Exoc6b Sec15b Sec15l2
TRINITY_DN12936_c0_g1	-3.88662	-1.01889	0.170723	-0.282483	0.0418631	Q60847	Col12a1
TRINITY_DN12937_c0_g1	0.645475	-0.439569	-0.523217	-0.448552	0.0256765	P53612	Rabggtb
TRINITY_DN12937_c0_g2	0.842347	0.0193299	-0.495564	0.116325	0.213487	P53612	Rabggtb
TRINITY_DN129375_c0_g1	-2.67693	-0.111649	1.8899	1.20245	#N/A	Q9DC53	Cpne8
TRINITY_DN1294_c0_g1	1.91996	0.866974	0.605075	0.814142	0.00256666	A2BE28	Las1l
TRINITY_DN12943_c0_g1	-0.611055	0.177759	-4.31366	0.0578109	#N/A	Q8CG85	Mamdc2
TRINITY_DN12944_c0_g1	-1.75969	-2.02882	0.243514	-2.84756	0.328228	P21956	Mfge8
TRINITY_DN12952_c0_g1	-1.88435	0.586511	-1.29664	-1.67294	0.11373	Q01102	Selp Grmp
TRINITY_DN12953_c0_g1	-0.779419	1.0613	0.763542	0.30922	0.273887	Q8BZM0	Klhl12 C3ip1
TRINITY_DN12953_c0_g2	-0.408637	2.19918	3.32142	3.67315	0.430217	Q6TDP3	Klhl17
TRINITY_DN12955_c0_g1	-0.493873	-2.02619	-1.49432	1.06098	0.428476	Q9Z2E3	Ern2 Ire2
TRINITY_DN12956_c0_g1	-1.25239	-0.109389	-0.370622	-0.664562	0.450545	Q11127	Fut4 Elft
TRINITY_DN12957_c0_g2	0.804058	-0.812908	0.156017	0.760932	0.346521	Q8BLA1	Dlec1
TRINITY_DN1296_c0_g2	-0.112688	-0.670148	-1.05121	-1.43174	0.0105278	Q9QZ88	Vps29
TRINITY_DN12960_c0_g1	-0.129224	0.0644907	0.444954	0.33238	0.943262	Q5F285	Tmem256
TRINITY_DN12960_c0_g2	-2.06817	0.415646	-0.410768	-1.64038	0.586287	Q60989	Xiap Aipa Api3 Birc4 Miha
TRINITY_DN12960_c0_g3	-5.84756	-5.6524	-1.31528	-1.75302	#N/A	O08863	Birc3
TRINITY_DN12962_c0_g1	-0.435305	-0.20267	-0.439666	-0.255834	0.56508	O88856	Tpst2 D5ucla3
TRINITY_DN12962_c1_g1	0.0645206	0.595985	-0.427078	0.345126	0.725949	P11369	Pol Gm17492
TRINITY_DN12964_c0_g1	-1.51021	-2.01006	-1.23231	-0.762368	0.292984	Q9D305	Thap2
TRINITY_DN12968_c0_g2	-2.48776	-5.67655	-8.26815	-2.17782	0.0432593	C3VPR6	Nlrc5
TRINITY_DN12973_c0_g1	-1.04119	-0.602773	-0.503485	-0.382628	0.12727	Q64441	Cyp24a1 Cyp-24 Cyp24
TRINITY_DN12977_c0_g1	-3.5148	-0.840432	-0.469701	-0.14299	0.00442549	Q80TS3	Adgrl3 Kiaa0768 Lec3 Lphn3
TRINITY_DN1298_c0_g1	-1.53121	0.490343	0.518032	0.122791	0.0192049	Q9EQY0	Ern1 Ire1
TRINITY_DN12984_c0_g1	-5.83903	-0.539553	-5.50802	-5.64848	#N/A	Q99KR6	Rnf34
TRINITY_DN129857_c0_g1	1.14699	2.85159	0.969642	1.47623	#N/A	Q9Z1M7	Large1 Kiaa0609 Large
TRINITY_DN12992_c0_g1	-2.63931	-0.976073	1.00513	1.70807	0.00322158	Q99L20	Gstt3
TRINITY_DN12996_c0_g1	-1.25925	-1.7813	-0.0956637	-0.187127	0.374188	P35347	Crhr1 Crhr
TRINITY_DN13_c0_g1	0.626732	0.0145324	-0.0880882	0.0537043	0.10357	O08749	Dld
TRINITY_DN13_c1_g1	0.342006	1.01091	0.438778	0.355511	0.104457	Q8C570	Rae1 Mrnp41
TRINITY_DN130_c1_g1	1.64056	0.314124	0.12115	0.537309	0.0238848	Q9Z176	Ppp2r3d Ppp2r3a Ppp2r6
TRINITY_DN13010_c0_g1	-1.55354	-0.640999	-0.0274702	0.410342	0.0448659	Q9DCW2	Plscr2
TRINITY_DN13016_c0_g1	0.95098	0.509111	0.0227641	0.3477	0.702343	O09159	Man2b1 Laman Man2b Manb
TRINITY_DN130182_c0_g1	7.91509	4.08896	2.67509	5.74572	0.0121798	Q9D9W0	Spatc1l
TRINITY_DN13019_c0_g1	0.270268	-0.204889	-0.520879	0.157325	0.558592	Q80VJ2	Sra1
TRINITY_DN130204_c0_g1	1.17861	-0.847818	3.14205	4.50413	#N/A	Q8JZP3	Klhl2
TRINITY_DN130239_c0_g1	-1.04304	0.0694379	6.04894	6.42169	0.582738	P97931	Ung Ung1
TRINITY_DN130243_c0_g1	-1.03075	-1.40699	-1.1803	-2.01663	0.839963	P20918	Plg
TRINITY_DN13026_c0_g1	-0.806466	1.57153	-0.2076	1.7482	0.493405	Q8VBX4	Cd207 Clec4k
TRINITY_DN13027_c0_g1	-1.78575	-2.91467	-2.66815	-3.64602	4.93178e-06	Q9D154	Serpinb1a Serpinb1
TRINITY_DN13027_c0_g2	-0.847978	0.916247	-0.903244	-0.334699	0.223207	Q60854	Serpinb6 Serpinb6a Spi3
TRINITY_DN130291_c0_g1	3.82784	-0.847857	2.71611	3.54368	#N/A	P45481	Crebbp Cbp
TRINITY_DN1303_c1_g1	-1.56055	-1.19626	-0.279134	-0.828342	0.680884	P11369	Pol Gm17492
TRINITY_DN1303_c2_g2	-1.02288	-0.130498	-0.0126396	-0.429726	0.974289	P11369	Pol Gm17492
TRINITY_DN13031_c0_g1	0.462638	0.160235	0.130888	-0.0570007	0.676883	Q8CCA0	Dcun1d4
TRINITY_DN13038_c0_g1	-5.56396	1.77141	2.05292	1.5329	0.0175549	O54904	B3galt1
TRINITY_DN13039_c0_g1	-1.45993	-0.737653	0.8526	0.375364	0.28496	O88310	Itln1 Intl Itln Itln1a Itlna
TRINITY_DN1304_c0_g1	-1.89121	-3.29502	-3.28886	-3.98836	6.9794e-05	Q62210	Birc2
TRINITY_DN1304_c6_g1	0.915188	0.102491	0.560348	0.169181	0.995302	Q62210	Birc2
TRINITY_DN13040_c0_g1	0.353673	0.67745	-0.0794028	0.491539	0.700754	A2AVA0	Svep1
TRINITY_DN13041_c0_g1	2.33052	1.73335	0.293781	0.915861	0.849562	Q91WQ3	Yars1 Yars
TRINITY_DN13048_c0_g1	-1.03704	-1.10076	-0.869515	0.0365244	0.645708	Q9R1S8	Capn7 Palbh
TRINITY_DN1305_c0_g1	0.780039	-0.204743	0.27267	0.542292	0.885263	P06795	Abcb1b Abcb1 Mdr1 Mdr1b Pgy1 Pgy1-1
TRINITY_DN1305_c0_g2	0.576125	0.0613704	0.526455	0.846366	0.717805	P21447	Abcb1a Abcb4 Mdr1a Mdr3 Pgy-3 Pgy3
TRINITY_DN13051_c0_g1	0.284532	5.28732	4.72094	1.47671	#N/A	Q8VBY2	Camkk1 Camkk
TRINITY_DN13051_c0_g2	-4.53544	0.821335	-0.622065	-3.82447	0.0966644	Q9WTK7	Stk11 Lkb1
TRINITY_DN13052_c0_g1	-0.366071	-1.60153	-2.3968	-2.86875	6.77817e-17	Q8BY79	Slc35g1 Tmem20
TRINITY_DN13053_c0_g1	-2.85089	-2.36857	-4.85501	-4.13431	6.41883e-13	Q9WV38	Slc2a5 Glut5
TRINITY_DN13054_c0_g1	3.19614	1.61003	1.63507	2.3614	1.63151e-12	Q810T2	Ccnb3 Cycb3
TRINITY_DN13055_c1_g1	-1.64566	-0.792152	-1.98762	-1.99747	0.0085624	B7ZCC9	Adgrg4 Gpr112
TRINITY_DN13058_c0_g1	-0.247339	-0.369299	-0.540764	-0.780783	0.0925495	P28033	Cebpb
TRINITY_DN1306_c0_g1	-0.681775	-1.4286	-1.70265	-2.0891	0.00704894	O55137	Acot1 Cte1
TRINITY_DN1306_c0_g2	-1.03859	-1.32026	-1.83912	-1.04606	0.04066	A2AKK5	Acnat1
TRINITY_DN1306_c1_g1	0.693348	0.722353	-0.538043	-0.701749	0.0671094	Q91X34	Baat
TRINITY_DN13064_c1_g1	-5.91898	-1.47608	-1.01128	-0.401042	0.00759598	Q8K3Z0	Nod2 Card15
TRINITY_DN13066_c0_g1	1.39252	0.764489	0.621597	0.615204	0.00144697	P59997	Kdm2a Fbl11 Fbxl11 Jhdm1a Kiaa1004
TRINITY_DN13067_c0_g1	0.464309	0.066445	0.0417734	0.12746	0.844914	O88491	Nsd1
TRINITY_DN1307_c0_g1	-0.0091947	0.568282	0.980663	1.25758	0.00920932	Q8VCV9	Mfsd4b1 Naglt1a
TRINITY_DN13073_c0_g1	1.14717	-1.46343	-0.345379	0.363563	0.0405292	Q3USS3	Drc1 Ccdc164 Gm1060
TRINITY_DN13074_c0_g1	-2.31873	-1.70237	-1.66764	-0.82535	0.000280401	Q03311	Bche
TRINITY_DN130758_c0_g1	2.90058	1.5189	3.47265	0.161874	#N/A	A2AV25	Fibcd1
TRINITY_DN13079_c0_g1	-5.99283	-4.13086	-0.681055	0.113343	0.00027664	P28229	Gjc1 Cxn-45 Gja7
TRINITY_DN1308_c0_g1	-1.84555	-1.2217	-0.685192	-0.581394	0.361406	Q69ZR2	Hectd1 Kiaa1131 Opm
TRINITY_DN13083_c0_g1	-0.659105	0.327468	-0.511446	1.83016	0.692634	Q6PDJ1	Cachd1 Kiaa1573 Vwcd1
TRINITY_DN13084_c0_g1	0.183565	-1.07375	-0.160071	0.190174	0.450948	Q61884	Mns1
TRINITY_DN13086_c0_g1	-2.36399	-1.16191	-0.323784	0.0772308	0.208768	Q7TME0	Plppr4 D3Bwg0562e Kiaa0455 Lppr4 Php1 Prg1
TRINITY_DN13088_c0_g1	-0.114329	0.320226	0.223256	-0.092669	0.90474	O08542	Efna4 Epl4 Eplg4 Lerk4
TRINITY_DN13092_c0_g1	-0.627321	-0.41192	-0.13567	-0.136536	0.5006	Q9QZQ0	Npas3 Mop6
TRINITY_DN13093_c0_g1	1.18969	4.02888	2.62692	3.82958	0.0604271	Q8BZM0	Klhl12 C3ip1
TRINITY_DN13093_c0_g2	-0.714653	-1.32637	-0.733287	-1.35348	0.893035	Q8BZM0	Klhl12 C3ip1
TRINITY_DN13093_c1_g1	-1.70246	0.350215	-0.67896	1.1288	#N/A	Q8BZM0	Klhl12 C3ip1
TRINITY_DN13095_c0_g1	-1.66726	-0.524904	-1.03603	-1.39231	0.838149	Q8BUB6	Ust
TRINITY_DN13097_c0_g2	0.64366	1.01776	3.32749	4.18534	0.013834	Q9ESD1	Prss8 Cap1
TRINITY_DN13098_c0_g1	0.908143	-0.0268583	0.852725	-0.0918493	0.823127	P50295	Nat2 Aac2
TRINITY_DN1310_c0_g1	1.28396	1.53145	0.947656	0.850361	0.00600552	Q9R1P1	Psmb3
TRINITY_DN13106_c0_g1	-1.31469	-1.54196	-0.534544	-1.68655	0.695744	P61458	Pcbd1 Dcoh Pcbd
TRINITY_DN13118_c0_g1	-1.51487	-0.736598	-0.418682	-1.02416	0.425636	Q80TS3	Adgrl3 Kiaa0768 Lec3 Lphn3
TRINITY_DN13119_c0_g1	1.09916	0.374466	0.526003	0.471994	0.923712	Q9WVS6	Prkn Park2
TRINITY_DN13122_c0_g1	-4.17215	-0.823289	-0.608235	-0.310212	0.0795273	Q80XH4	Wscd1 Kiaa0523
TRINITY_DN131251_c0_g1	2.42953	3.13303	4.81074	3.91131	#N/A	P45952	Acadm
TRINITY_DN13128_c0_g1	0.260863	-0.135713	-0.335128	-0.157656	0.770703	Q9CQW0	Emc6 Tmem93
TRINITY_DN13128_c2_g1	-0.0603435	-0.506567	-0.0672577	-0.31081	0.910795	Q8K2W3	Txndc11
TRINITY_DN13129_c0_g1	0.797179	1.20528	0.561446	1.85702	0.790263	D3YXG0	Hmcn1
TRINITY_DN1313_c0_g1	-2.29694	0.048706	0.22871	0.0639146	6.95109e-05	A2AVA0	Svep1
TRINITY_DN1313_c1_g1	-2.61628	-0.431927	0.198891	-0.549193	0.117319	A2AVA0	Svep1
TRINITY_DN13130_c0_g1	0.298417	0.430706	0.607495	0.847037	0.662695	Q6NWW5	Kif24
TRINITY_DN13145_c0_g1	0.363301	-0.309674	-0.306171	-0.0244752	0.114511	Q8CHP5	Pym1 Pym Wibg
TRINITY_DN13147_c0_g1	-0.121302	0.0845231	-0.120717	0.0576167	0.98302	Q9DBU2	Naa60 Nat15
TRINITY_DN13148_c0_g1	-1.61133	-1.07264	-1.20795	-1.30637	0.0011047	Q80W47	Wipi2
TRINITY_DN1315_c0_g1	0.0253157	-0.104928	-0.0307018	-0.0414823	0.997409	Q80TG1	Kansl1 Kiaa1267 Nsl1
TRINITY_DN13156_c1_g1	-0.31691	-1.76195	-0.691029	0.0501845	0.797413	P11369	Pol Gm17492
TRINITY_DN13161_c0_g1	0.298966	0.936761	0.263082	0.0569778	0.521807	Q8BWU8	Etnppl Agxt2l1
TRINITY_DN13163_c0_g1	-1.59011	0.196504	0.64369	-0.24456	0.963264	P06795	Abcb1b Abcb1 Mdr1 Mdr1b Pgy1 Pgy1-1
TRINITY_DN13166_c0_g1	2.23664	0.890962	0.576555	1.09959	4.19639e-06	Q9D3U0	Pus10 Ccdc139
TRINITY_DN13168_c0_g1	-0.372219	-1.1982	0.279883	-0.701418	0.537901	A2AJ76	Hmcn2
TRINITY_DN1317_c0_g1	-1.91871	-1.15493	-0.903068	-0.949779	0.0148734	Q5SSZ5	Tns3 Tens1
TRINITY_DN13170_c0_g1	-0.520198	-0.797369	-0.848759	-0.673693	0.0945551	Q80SY4	Mib1 Dip1 Kiaa1323 Mib
TRINITY_DN13173_c0_g2	-0.869024	-0.511864	-0.715459	-0.336163	0.250846	Q8CG80	Shf
TRINITY_DN13177_c0_g1	1.1383	0.544987	0.107375	0.66276	0.58082	Q8BHA3	Dtd2
TRINITY_DN1318_c1_g1	-0.725518	0.527959	1.20051	0.397768	0.380591	Q8BJU2	Tspan9 Net5
TRINITY_DN13185_c0_g1	-1.44024	-1.19475	-2.93417	-3.29813	0.0507871	P06684	C5 Hc
TRINITY_DN13186_c0_g1	-2.2471	-0.879503	-1.66373	-1.58611	0.113587	O88322	Nid2
TRINITY_DN13186_c1_g1	-0.85998	-1.99723	-1.49257	-1.22681	0.990054	Q61555	Fbn2 Fbn-2
TRINITY_DN13187_c0_g1	3.88318	2.53603	2.69418	4.05133	0.343079	P21956	Mfge8
TRINITY_DN13189_c0_g1	0.713403	0.0493818	0.323557	0.577288	0.588118	Q8BTF7	Lig4
TRINITY_DN1319_c0_g1	-1.59558	-1.21016	-1.63345	-1.11267	0.00232562	Q6PDS3	Sarm1 Kiaa0524
TRINITY_DN13190_c0_g2	0.432305	-0.178732	-0.104799	0.0423047	0.742562	Q80Y14	Glrx5
TRINITY_DN13191_c0_g1	2.03528	0.71531	1.34767	0.88703	0.0118085	Q3UG98	Nat9
TRINITY_DN13194_c0_g1	0.823772	0.91958	1.08571	0.544915	0.944532	P40646	Sox7 Sox-7
TRINITY_DN13194_c0_g2	1.6521	1.11814	0.948841	0.370418	0.059768	P40646	Sox7 Sox-7
TRINITY_DN132_c0_g2	0.0465527	-0.969042	-1.1765	-1.07718	0.122708	Q8CFD5	Ercc8 Ckn1 Csa
TRINITY_DN1320_c0_g1	2.33579	1.61773	1.11126	1.06273	4.36763e-05	Q921I9	Exosc4 Rrp41
TRINITY_DN13202_c0_g1	-0.12184	-1.14296	0.282663	0.978224	0.388977	Q9DA69	Ift43
TRINITY_DN13205_c0_g1	-2.16982	-0.437361	0.188479	0.392797	3.13736e-06	P06876	Myb
TRINITY_DN13209_c0_g1	-0.855899	0.665255	-0.367113	0.52909	0.622157	Q8BQ86	Chst8
TRINITY_DN132106_c0_g1	-1.54423	2.00129	0.223175	2.92083	#N/A	Q3TUA9	Pomk Sgk196
TRINITY_DN13211_c0_g1	-0.584095	-0.0616009	-0.210042	0.0920205	0.839816	Q91XD4	Ftcd
TRINITY_DN13213_c0_g1	0.0467492	0.0398773	0.0566647	-0.399925	0.802585	Q6PCM2	Ints6 Dbi1 Ddx26
TRINITY_DN13213_c0_g2	-0.255355	-0.177062	0.0378328	-0.400635	0.520749	Q6PCM2	Ints6 Dbi1 Ddx26
TRINITY_DN13214_c0_g1	0.943367	7.2289	-3.21345	-2.56461	0.00199669	A2AJ76	Hmcn2
TRINITY_DN13215_c0_g1	-0.886071	0.345326	0.894358	0.600068	0.353553	Q9JLB4	Cubn Ifcr
TRINITY_DN13217_c0_g1	-0.62122	-1.33132	0.103144	-0.875396	0.648286	Q8BXT1	Rgs8
TRINITY_DN13218_c0_g1	-2.11561	1.35925	0.906156	-1.12198	0.00536913	Q8VEB4	Pla2g15 Lypla3
TRINITY_DN1322_c0_g1	-0.544683	-0.718512	-0.865343	-0.896811	0.000226145	Q8VDJ3	Hdlbp
TRINITY_DN1322_c1_g1	-1.11541	-0.490051	0.0911891	0.114011	0.344358	Q6NXK7	Dpp10
TRINITY_DN13220_c0_g1	-1.29997	1.55821	1.50802	1.08262	4.19517e-06	Q811B3	Adamts12
TRINITY_DN132207_c0_g1	3.09998	4.03187	1.43047	1.16611	0.099998	G5E8K6	Slc16a5 Mct5 Mct6
TRINITY_DN13228_c0_g1	-2.34079	-1.66464	0.0669561	-8.69783	0.212123	Q9EQY0	Ern1 Ire1
TRINITY_DN13233_c0_g1	0.21637	-0.0388296	-0.00877424	-0.347148	0.873457	Q69ZN6	Gnptab Gnpta Kiaa1208
TRINITY_DN13236_c0_g3	8.29469	5.13954	3.64443	5.97772	0.00997207	Q8BJR6	Prss27 Mpn
TRINITY_DN1325_c0_g1	-0.160368	-1.28557	-0.0899456	0.751486	0.443019	Q9D2H2	Ak7
TRINITY_DN13253_c0_g1	-3.62266	-1.38361	-1.87285	-1.20295	0.1983	P55097	Ctsk
TRINITY_DN1326_c0_g1	0.267651	0.812291	0.574168	0.329477	0.43898	O35286	Dhx15 Ddx15 Deah9
TRINITY_DN1326_c0_g2	2.06256	0.94867	0.631085	0.878656	0.0119508	O35286	Dhx15 Ddx15 Deah9
TRINITY_DN13263_c0_g1	3.11715	2.00866	1.90247	2.07404	2.40013e-13	P97477	Aurka Aik Airk Ark1 Aura Ayk1 Btak Iak1 Stk15 Stk6
TRINITY_DN13266_c0_g1	-0.139425	-0.883239	-0.713487	-0.286486	0.566572	Q7TT23	0
TRINITY_DN13267_c0_g1	0.336672	0.261772	0.343864	0.650873	0.893806	Q6S5C2	Gnptg Mdcp1
TRINITY_DN13269_c0_g1	-2.90669	-2.6563	-0.528971	0.489288	0.164161	B2RVL6	Zcchc24
TRINITY_DN13276_c0_g1	-0.100513	-3.38372	-1.1085	-0.975877	0.607697	Q6TCG2	Paqr9
TRINITY_DN13278_c0_g1	-1.7091	-1.09567	-2.30162	-0.527747	0.00627355	Q9DCM0	Ethe1 Hsco
TRINITY_DN1328_c0_g1	-0.0618612	-0.308355	-0.462307	-0.258432	0.214886	Q99NB9	Sf3b1 Sap155
TRINITY_DN13281_c0_g1	0.685242	1.4656	-0.0598014	-1.30584	0.00843493	Q8BGC3	Slc16a12 Mct12
TRINITY_DN13286_c0_g1	1.11213	0.0650424	-0.10562	-0.0610765	0.0438527	P70295	Aup1
TRINITY_DN13289_c0_g1	0.222136	1.74784	-0.560976	-0.408914	0.543534	Q52KP5	Nxpe4 Fam55d
TRINITY_DN1329_c0_g1	-0.270838	-0.208347	-0.801454	-0.587773	0.0101042	Q61037	Tsc2
TRINITY_DN13291_c0_g1	-1.35518	-1.02731	-0.600743	-0.0813449	0.217854	Q8C3L1	Ssuh2 Ssu2
TRINITY_DN13291_c1_g1	0.036634	0.0696153	0.399705	0.391932	0.97217	Q8C3L1	Ssuh2 Ssu2
TRINITY_DN13293_c0_g1	-1.81301	-1.15939	2.83619	3.20296	0.00460881	Q9JHE4	Gal3st1 Cst Gcst
TRINITY_DN13296_c0_g2	-1.58665	0.699147	0.654216	0.0569164	0.784611	O54904	B3galt1
TRINITY_DN132986_c0_g1	-3.9335	-3.78963	-0.562629	-1.57835	0.24227	Q0VBN2	Dsel
TRINITY_DN1330_c0_g1	1.66808	1.33928	1.42876	1.36015	0.0890996	Q91XU0	Wrnip1 Whip
TRINITY_DN1330_c0_g2	6.0963	6.20167	5.79868	4.57569	0.240006	Q91XU0	Wrnip1 Whip
TRINITY_DN13305_c0_g1	-0.309255	-1.28415	-0.90377	-0.273282	0.501505	Q9WV04	Kif9
TRINITY_DN13309_c0_g1	2.61729	1.31738	3.43977	2.5934	0.482113	Q64448	Gja3
TRINITY_DN1331_c0_g1	-0.306876	-0.297986	-0.286871	-0.442962	0.644887	Q00899	Yy1 Ucrbp
TRINITY_DN13314_c0_g1	0.827169	-1.00387	0.0177937	0.649602	0.359925	Q9D3W5	Lrrc71
TRINITY_DN1332_c0_g1	-1.53482	-0.773265	-1.57584	-1.10123	0.000843689	Q8R1S9	Slc38a4 Ata3 Nat3 Snat4
TRINITY_DN13323_c0_g1	0.8629	0.27328	0.323348	0.128975	0.492736	Q8R1J3	Zcchc9
TRINITY_DN13329_c1_g1	-3.87394	0.00239972	0.271782	1.14467	0.0281744	Q00690	Sele Elam-1
TRINITY_DN133295_c0_g1	1.9071	1.69056	1.71439	1.70818	0.39529	Q8R164	Bphl
TRINITY_DN1333_c0_g1	0.160373	-0.0365092	0.0739579	0.256005	0.970548	Q6P5F9	Xpo1 Crm1
TRINITY_DN13336_c0_g1	0.606519	-0.576376	-0.229421	0.565619	0.91241	Q8BML2	Oacyl
TRINITY_DN13339_c0_g1	-2.58322	-0.23037	1.74139	1.5539	0.053916	Q3B7Z2	Osbp Kiaa4220
TRINITY_DN13340_c0_g1	0.924917	0.730121	0.468926	-0.245212	0.352177	Q9CYR6	Pgm3 Agm1 Pgm-3
TRINITY_DN13341_c0_g1	-0.605426	-1.13995	-0.886419	-0.225024	0.294362	Q99NF3	Cep41 Tsga14
TRINITY_DN13343_c0_g1	-1.82137	-0.782943	-0.461944	0.114213	0.184809	Q3TYE7	Tlcd5 Gm184 Tmem136
TRINITY_DN13345_c0_g1	-0.366839	-2.28335	-1.57279	-0.865935	0.0496935	A2AUM9	Cep152 Kiaa0912
TRINITY_DN13347_c0_g1	0.545257	0.199675	-0.10682	0.119702	0.767124	Q9DB90	Smg9
TRINITY_DN13347_c1_g1	0.379095	-0.292543	-0.122288	-0.31849	0.672106	P39098	Man1a2 Man1b
TRINITY_DN13349_c0_g1	-0.69891	-0.290316	0.0231139	-0.766652	0.979781	P18052	Ptpra Lrp Ptpa
TRINITY_DN133510_c0_g1	0.681176	0.63546	0.688522	-0.378807	0.976948	P63017	Hspa8 Hsc70 Hsc73
TRINITY_DN13354_c0_g1	1.20243	1.014	1.01163	1.22823	0.134351	P10077	Zfp27 Mkr4 Zfp-27
TRINITY_DN13359_c0_g2	-0.237542	1.1157	0.519822	1.13684	0.277002	Q80VR3	Sult1c1 Sult1a2
TRINITY_DN1336_c0_g1	0.305842	0.260678	0.574024	0.421208	0.861029	Q9D7N9	Apmap
TRINITY_DN13361_c0_g1	-6.18523	-5.36081	-0.496815	-4.10657	0.00564752	Q61084	Map3k3 Mekk3
TRINITY_DN13364_c0_g1	6.91853	3.9802	1.95714	5.30245	0.000191305	Q9D5V2	Klhl10
TRINITY_DN13366_c0_g2	-0.335951	-0.450385	-0.401871	-0.509514	0.703143	Q91ZT9	Asb8
TRINITY_DN13368_c0_g1	0.190895	0.0695391	0.176399	0.0715796	0.981075	P63085	Mapk1 Erk2 Mapk Prkm1
TRINITY_DN1337_c0_g1	-1.35492	-0.777624	-0.946679	-0.967557	0.0211197	Q9D3A8	Nos1ap Capon Kiaa0464
TRINITY_DN13379_c1_g2	-1.1153	0.604775	1.117	0.0823701	0.112981	Q8K3Z0	Nod2 Card15
TRINITY_DN1338_c0_g1	-0.938513	-0.910497	-1.08596	-1.02829	0.0188178	Q9ERD6	Ralgps2
TRINITY_DN13384_c0_g1	-1.43156	-1.01233	-0.00198002	0.64303	0.169108	Q3UVV9	Vwa3a
TRINITY_DN1339_c0_g1	-0.946465	-1.2628	-0.66876	-0.600694	0.877539	P24668	M6pr 46mpr
TRINITY_DN134_c0_g1	0.123097	0.196832	0.114098	-0.0163771	0.989568	P97471	Smad4 Dpc4 Madh4
TRINITY_DN1340_c0_g1	-0.164547	0.716957	-0.299508	-0.0310731	0.653502	A2AV25	Fibcd1
TRINITY_DN134032_c0_g1	-1.04298	-0.84782	4.09416	3.2474	#N/A	Q60710	Samhd1 Mg21
TRINITY_DN13404_c0_g1	0.763464	0.533803	0.438307	0.241267	0.647297	Q9Z1Z2	Strap Unrip
TRINITY_DN1341_c0_g1	-0.20535	0.0253809	0.78001	0.862333	0.018472	Q9CZU3	Mtrex Skiv2l2
TRINITY_DN13413_c0_g1	5.79879	3.73629	3.39428	3.15214	0.00264815	Q9QXS1	Plec Plec1
TRINITY_DN13416_c0_g1	2.02739	-1.80277	0.628769	0.797534	0.193762	Q9CR40	Klhl28 Btbd5
TRINITY_DN13416_c0_g2	-0.573148	0.356915	1.08291	0.299525	0.726349	Q8VCK5	Klhl20 Kiaa4210 Kleip
TRINITY_DN13416_c3_g2	-2.5389	-1.78563	0.60993	0.944172	#N/A	Q8BZM0	Klhl12 C3ip1
TRINITY_DN13417_c0_g1	-0.101738	-1.61959	0.223497	-1.23521	0.368801	P46097	Syt2
TRINITY_DN13419_c0_g4	5.54646	4.29573	4.22739	3.67097	3.72333e-19	Q3U0B3	Dhrs11 Sdr24c1
TRINITY_DN1342_c0_g1	0.071531	1.28015	0.890196	0.785376	0.368801	P70389	Igfals Albs Als
TRINITY_DN13423_c0_g1	0.17495	-0.610369	1.6782	-2.17064	0.210817	Q9WU63	Hebp2 Soul
TRINITY_DN134241_c0_g2	0.15973	-1.17908	1.95947	0.757	#N/A	Q2WF71	Lrfn1 Salm2 Semo1
TRINITY_DN13429_c0_g1	-0.720929	-0.814032	-1.00041	-1.00067	0.520558	Q9DBP5	Cmpk1 Cmk Cmpk Uck Umk Umpk
TRINITY_DN13430_c0_g1	0.0899347	-0.291216	-0.0143182	-0.254279	0.882325	Q9WUB4	Dctn6 Ws3
TRINITY_DN13431_c0_g1	-0.273374	0.724939	0.229845	0.579845	0.62694	Q8JZU2	Slc25a1
TRINITY_DN13437_c0_g1	1.02738	0.953623	1.13477	0.676484	0.256764	Q9R1Z7	Pts
TRINITY_DN13439_c0_g1	1.29153	0.131556	0.0432662	0.635714	0.222294	Q8BGV0	Nars2
TRINITY_DN1344_c0_g1	-0.510314	-1.03573	-1.31865	-1.09677	0.00579893	Q9WTX5	Skp1 Skp1a
TRINITY_DN13440_c0_g1	-2.8507	-4.02576	-1.337	-0.44405	0.0558821	O70299	Mab21l1 Mab21
TRINITY_DN1345_c0_g1	2.11096	-0.627151	1.08251	1.82271	0.0816036	A2RSX4	Stpg3
TRINITY_DN13452_c0_g1	5.40315	2.49146	1.32432	2.90306	1.57657e-06	Q9D1D1	Tspan11
TRINITY_DN13453_c0_g1	1.56944	0.856298	0.453541	0.489276	0.0616054	Q6NXW6	Rad17
TRINITY_DN13453_c0_g2	1.61254	0.546156	0.560474	0.676527	0.0133876	Q6NXW6	Rad17
TRINITY_DN13454_c1_g1	0.937562	0.590934	-0.818803	-0.494396	0.918155	Q8BZM0	Klhl12 C3ip1
TRINITY_DN13459_c0_g1	1.09133	0.58687	0.593025	0.153396	0.492686	Q9Z1X2	Ptdss2 Pss2
TRINITY_DN1346_c0_g1	-0.0730505	-0.38208	-0.527147	-0.493767	0.634274	Q99JT9	Adi1 Mtcbp1
TRINITY_DN13466_c0_g2	1.34089	0.563127	-0.218357	0.0437199	0.00169941	P13516	Scd1
TRINITY_DN13468_c0_g1	0.214519	1.10847	-0.408004	-0.431752	0.903701	P97435	Tmprss15 Entk Prss7
TRINITY_DN1347_c0_g1	-0.227888	-0.0648289	-0.0670268	-0.0166163	0.98103	Q2VPU4	Mlxip Mir
TRINITY_DN13474_c0_g1	2.90398	0.770311	1.19529	1.7717	0.134505	Q9QUM7	Msh5
TRINITY_DN13478_c0_g1	-1.62846	0.0903915	0.857269	0.433052	0.885937	Q9Z265	Chek2 Chk2 Rad53
TRINITY_DN13483_c0_g1	-7.12639	1.06989	0.898302	-6.93584	#N/A	Q60976	Jrk
TRINITY_DN134844_c0_g1	-2.86422	-1.28454	-0.209913	-2.08888	0.453794	Q3V080	Znf583 Zfp583
TRINITY_DN13487_c0_g1	-1.37522	-1.8561	-0.960381	-1.36017	0.0471781	Q91WD9	Scgn
TRINITY_DN13489_c0_g1	2.69654	3.09326	2.14671	4.14268	#N/A	Q9DB30	Phkg2
TRINITY_DN1349_c0_g1	-0.695335	-0.723931	-1.27461	-0.565253	0.0539225	Q8R4K2	Irak4
TRINITY_DN13493_c0_g1	-1.02169	1.60435	0.296797	0.0229538	0.0749827	O08762	Prss12 Bssp3
TRINITY_DN13493_c1_g1	1.56388	2.89209	-0.410646	-0.369557	0.0324585	Q8BIK6	Tmprss7
TRINITY_DN13498_c0_g1	-2.90986	-3.20209	-3.19753	-3.96601	0.130453	Q8VBX4	Cd207 Clec4k
TRINITY_DN13498_c0_g2	2.16641	-2.01349	-3.59343	-6.12289	0.133492	Q91ZW9	Cd209c
TRINITY_DN135_c0_g1	-4.50389	-5.10261	-5.8411	-4.94387	7.57692e-10	A2AV25	Fibcd1
TRINITY_DN135_c0_g2	-2.33699	-3.19763	-3.97314	-4.11511	0.0349432	Q80YX1	Tnc Hxb
TRINITY_DN1350_c0_g1	1.48365	0.347367	0.334408	0.906602	0.0117898	P53702	Hccs Cchl
TRINITY_DN13502_c0_g1	0.006629	-0.264789	-0.569896	-0.868328	0.34313	Q8BH49	Pheta1 Fam109a
TRINITY_DN13508_c0_g1	1.82135	0.907804	0.991801	1.36395	0.0225297	Q922H1	Prmt3 Hrmt1l3
TRINITY_DN13508_c1_g1	0.507908	0.581223	0.560056	1.15228	0.662498	Q8VD76	Gtf2h3
TRINITY_DN13508_c1_g2	0.605135	0.453176	0.249105	0.895485	0.632196	Q8VD76	Gtf2h3
TRINITY_DN13509_c0_g1	-0.619646	-0.691431	-0.668413	-0.592432	0.00174451	Q60996	Ppp2r5c
TRINITY_DN1351_c0_g1	0.894622	1.09973	0.669414	0.737756	0.40903	Q60847	Col12a1
TRINITY_DN13516_c0_g1	0.0479924	-0.276212	-1.44357	-0.87408	0.553033	Q9EQC0	Chst1 Gst1
TRINITY_DN13519_c0_g1	2.86762	2.37917	3.85709	2.82758	0.0332923	Q9QZ05	Eif2ak4 Gcn2 Kiaa1338
TRINITY_DN1352_c0_g1	0.409013	0.0221536	0.55112	-0.215449	0.810113	Q8R2S9	Actr8 Arp8
TRINITY_DN13520_c0_g1	-1.2381	0.353601	0.647633	1.643	0.730997	Q9QWG7	Sult1b1
TRINITY_DN13522_c0_g1	1.10328	0.132788	0.558264	0.575123	0.740153	Q3TQQ9	0
TRINITY_DN13529_c0_g1	-0.655389	-0.250212	0.253057	0.725271	0.211731	Q5SQM0	Eml6 Eml5l
TRINITY_DN1353_c0_g1	-0.609606	-0.350801	-0.314467	-0.440674	0.501221	Q812E0	Cpeb2
TRINITY_DN13534_c0_g1	0.127982	0.752342	-0.163406	0.0581056	0.929638	O88909	Slc22a8 Oat3 Roct
TRINITY_DN13535_c0_g1	0.106942	-1.54638	-0.17015	-1.06836	0.949425	Q64481	Cyp3a16 Cyp3a-16
TRINITY_DN13536_c0_g1	-1.5981	-1.53484	-1.37724	-1.14399	7.48031e-17	Q920Q8	Ivns1abp Kiaa0850 Nd1 Nd1L Nd1S Ns1 Ns1bp
TRINITY_DN13538_c0_g1	-2.74464	0.724496	0.994039	-0.0554662	0.000385371	Q2EMV9	Parp14 Kiaa1268
TRINITY_DN13544_c0_g1	0.00303593	-2.57394	-1.40299	-0.638012	#N/A	Q5SNZ0	Ccdc88a Grdn Kiaa1212
TRINITY_DN13545_c0_g1	0.0111433	0.179667	-0.455396	-0.259365	0.121427	P84091	Ap2m1 Clapm1
TRINITY_DN1355_c0_g1	0.827316	0.0712749	0.253961	0.38905	0.512432	Q60928	Ggt1 Ggt Ggtp
TRINITY_DN1356_c0_g1	-1.673	-0.871705	-1.68998	-1.77692	0.000841377	P16056	Met
TRINITY_DN1357_c0_g1	-1.34441	-1.30778	-0.569708	-1.09899	5.87686e-07	P20444	Prkca Pkca
TRINITY_DN13573_c0_g1	-1.64891	-0.463207	-0.0664916	0.118129	0.83339	Q7TM99	Slc16a9 Mct9
TRINITY_DN13577_c0_g1	-0.550071	-0.242399	-0.555954	-0.591595	0.195318	O54965	Rnf13 Rzf
TRINITY_DN1358_c0_g1	0.38024	0.289826	0.473368	0.259161	0.796677	O35372	Cnih1 Cnih
TRINITY_DN13586_c0_g1	-0.122911	2.09124	0.876269	1.89506	0.320517	Q91X17	Umod
TRINITY_DN13589_c0_g1	-0.614412	-0.00979823	-0.191233	0.268131	0.655044	Q921J4	Ube2s E2epf
TRINITY_DN1359_c0_g1	-1.2014	-1.767	-1.32489	-0.987502	0.478866	P84228	H3c2 H3-53 H3.2 H3b Hist1h3b; H3c3 H3-143 Hist1h3c; H3c4 H3-B Hist1h3d; H3c6 H3-F Hist1h3e; H3c7 H3.2-221 H3f Hist1h3f; H3c13 H3.2-616 Hist2h3b; H3c14 H3.2-615 Hist2h3c1 Hist2h3ca1; H3c15 H3.2-614 Hist2h3c2 Hist2h3ca2
TRINITY_DN13590_c0_g1	-1.31165	-0.409567	0.320412	-0.539987	0.341374	Q6NXK8	Asic1 Accn2 Asic Bnac2
TRINITY_DN13591_c0_g1	-1.02194	-0.136933	0.548086	0.314197	0.567946	O08914	Faah Faah1
TRINITY_DN13592_c0_g1	0.368531	-0.357494	-0.397542	-0.392711	0.00160166	A2A8Z1	Osbpl9 Orp9
TRINITY_DN13596_c0_g1	0.785619	0.431271	0.453615	0.45618	0.0396583	Q3U8K7	Kmt5b Suv420h1
TRINITY_DN13597_c0_g1	1.49524	0.722864	1.01689	1.32267	0.00263485	Q9QWT9	Kifc1 Kifc4 Kifc5a Kifc5b
TRINITY_DN136_c0_g1	1.90566	-0.0644986	0.309103	0.48699	0.00734709	Q9DB70	Fundc1
TRINITY_DN1360_c0_g1	0.575004	0.452956	0.64105	0.441741	0.365326	Q8BPP0	Znf436 Kiaa1710 Mlz-4 Zfp46
TRINITY_DN13600_c0_g1	-0.0141467	2.64275	1.76376	1.13645	0.214759	D3YXG0	Hmcn1
TRINITY_DN13602_c0_g1	1.60648	1.68563	1.43087	1.21489	0.0506382	Q9Z0J0	Npc2
TRINITY_DN13606_c0_g1	2.82553	0.324665	-1.77376	0.351286	0.0141564	A2AVA0	Svep1
TRINITY_DN13608_c0_g1	1.48121	0.62548	0.392298	-0.00909599	0.0787174	Q8R3S2	Tspan33 Pen
TRINITY_DN13610_c0_g1	0.144933	-0.125593	-0.356291	-0.466817	0.608636	Q62132	Ptprr Ptp13
TRINITY_DN13614_c0_g1	1.04526	0.362407	0.263136	0.159941	0.536219	Q9CYK1	Wars2
TRINITY_DN13616_c0_g1	-0.223518	0.299094	0.118708	0.495021	0.963513	Q6PGK7	Chst10
TRINITY_DN13619_c0_g1	0.890108	0.193248	0.889774	0.955999	0.564635	Q8VC48	Pex12
TRINITY_DN1362_c0_g1	-0.57728	0.896599	0.567465	1.02345	0.664142	Q8BH66	Atl1 Spg3a
TRINITY_DN1362_c0_g2	-3.11525	-0.231493	-0.26167	0.306012	0.00812462	Q8BH66	Atl1 Spg3a
TRINITY_DN13621_c0_g1	-0.753064	-0.650556	-0.353174	-0.499552	0.694032	P42859	Htt Hd Hdh
TRINITY_DN13623_c0_g1	2.99831	1.08855	0.7851	1.29183	5.9534e-09	Q9Z1B5	Mad2l1 Mad2a
TRINITY_DN13625_c0_g2	-4.87693	-2.42354	-1.70676	-1.01807	0.62668	P83510	Tnik Kiaa0551
TRINITY_DN13629_c0_g1	-0.0550044	-0.91892	0.193446	0.858281	0.469559	Q3UY96	Cfap74
TRINITY_DN1363_c0_g1	-0.890958	-0.630065	-0.338521	-0.370286	0.0860299	Q91Z69	Srgap1 Arhgap13
TRINITY_DN13632_c0_g1	-1.29142	1.49674	0.131377	0.280244	0.196104	Q9CXI3	Moxd1 Dbhr Mox
TRINITY_DN13637_c0_g1	-2.09004	-0.462819	-2.33507	-1.81154	0.149721	Q9ERP3	Trim54 Murf Rnf30
TRINITY_DN13639_c0_g1	-2.43177	-1.10707	-1.21931	-1.34203	0.745807	Q6TDP3	Klhl17
TRINITY_DN1364_c0_g1	4.42937	4.33316	4.03863	4.22412	1.64879e-05	Q9JJ11	Tacc3 Aint
TRINITY_DN13642_c0_g1	-1.83501	-1.61645	-1.49258	-0.938261	0.0252506	Q6PCQ0	Iqce
TRINITY_DN13644_c0_g1	-2.18359	-1.81473	-1.58781	-1.54437	0.218912	Q5U5V2	Hykk Agphd1
TRINITY_DN1365_c0_g1	-0.641977	-0.587875	-0.607435	-0.71556	0.0075309	Q9DAR7	Dcps Dcs1 Hint5
TRINITY_DN13650_c0_g1	1.98889	1.30365	3.2503	0.542752	0.0211197	P63017	Hspa8 Hsc70 Hsc73
TRINITY_DN13653_c0_g1	-0.170351	-0.03224	-0.031009	0.256599	0.897619	Q3V129	Ulk4
TRINITY_DN13657_c0_g1	1.4922	1.59778	2.40307	1.47548	0.473999	Q710D3	Unc93a
TRINITY_DN13659_c0_g1	-1.12258	0.331318	-0.399812	2.18528	0.614083	A2ASS6	Ttn
TRINITY_DN1366_c0_g1	1.31774	0.463237	0.367988	0.231397	0.000195145	Q8VCI0	Plbd1
TRINITY_DN13660_c0_g1	0.79595	-0.324695	0.234408	0.400708	0.700983	Q3UV70	Pdp1 Ppm2c
TRINITY_DN13668_c0_g1	0.555125	0.962489	2.34864	2.53871	0.0767241	Q8VCK5	Klhl20 Kiaa4210 Kleip
TRINITY_DN1367_c0_g1	-2.28412	0.183914	1.70374	0.814858	0.116229	P56404	Aqp8
TRINITY_DN13672_c0_g1	-0.867928	0.325914	-0.285242	-0.949728	0.861697	Q5DTZ0	Nynrin Kiaa1305
TRINITY_DN13675_c0_g1	-0.283553	-1.42831	-1.33464	-1.25781	0.000489229	Q925U4	Edem1 Edem
TRINITY_DN13676_c0_g1	7.46967	5.09955	4.57167	4.96106	4.34341e-11	Q99MV7	Rnf17
TRINITY_DN1368_c0_g1	-0.195551	-0.168841	-0.363986	-0.725457	0.23941	E9Q3L2	Pi4ka Pik4 Pik4ca
TRINITY_DN136854_c0_g1	0.110769	-0.36927	-0.174844	0.146816	0.876659	Q8C0K5	Slc25a16 Gda
TRINITY_DN13689_c0_g1	-1.32906	0.635439	0.808983	-0.783905	0.336744	B2RSH2	Gnai1 Gnai-1
TRINITY_DN1369_c0_g1	-1.05335	-0.504132	-0.23188	-0.134799	0.0327928	P16054	Prkce Pkce Pkcea
TRINITY_DN13690_c1_g1	-1.23427	0.226488	-1.00996	-2.0052	0.911998	E9Q555	Rnf213 Mystr
TRINITY_DN13691_c0_g1	-1.74999	0.646294	-0.157711	-0.17631	0.163037	Q8BI55	Dyrk4
TRINITY_DN137_c0_g1	-0.252813	-0.371907	-0.191729	-0.501521	0.657089	Q8CFC7	Clasrp Clasp Sfrs16 Srsf16 Swap2
TRINITY_DN1370_c0_g1	-0.245372	-0.0195505	0.217477	-0.0582517	0.885937	P26039	Tln1 Tln
TRINITY_DN13701_c0_g1	-2.90586	-3.68683	-1.22791	0.23421	0.0405052	D3YXG0	Hmcn1
TRINITY_DN13719_c0_g1	-0.194612	0.984591	1.71365	1.49087	0.153914	Q9QWG7	Sult1b1
TRINITY_DN1372_c0_g1	0.181413	0.545319	-0.00203378	0.0287515	0.758872	Q9D5T0	Atad1
TRINITY_DN13722_c0_g1	-2.41551	-1.04742	-8.00575	-8.1462	0.326591	P63017	Hspa8 Hsc70 Hsc73
TRINITY_DN13722_c0_g2	-5.21438	-1.74015	-1.44947	0.455926	0.416092	P63017	Hspa8 Hsc70 Hsc73
TRINITY_DN13724_c0_g1	-0.898274	-2.33639	-2.20987	-2.13925	0.73235	Q61543	Glg1 Esl1 Mg160 Selel
TRINITY_DN13739_c0_g1	0.592787	-0.0424042	1.87003	0.462065	0.279221	Q3UY23	Fdxacb1
TRINITY_DN1374_c0_g1	-0.9247	-0.831307	-0.630027	-0.74842	0.130712	O55098	Stk10 Lok
TRINITY_DN1374_c1_g1	3.96362	2.02083	1.68089	2.15731	6.2519e-05	Q8C8H8	Ky
TRINITY_DN1374_c1_g4	-1.74102	-1.24604	-0.824013	-1.11797	0.147686	Q8VCM5	Mul1 Gide
TRINITY_DN1374_c2_g1	-0.37988	-0.0660677	-0.455789	-0.751124	0.847256	P97470	Ppp4c Ppp4 Ppx
TRINITY_DN13740_c0_g1	5.15544	0.332757	-0.227295	1.99021	0.0831242	Q9JJ94	Ssna1 MNCb-2711
TRINITY_DN13743_c0_g1	-0.0264814	0.0887467	0.644058	0.289185	0.662695	Q9JME2	Chst11
TRINITY_DN13744_c0_g1	2.18526	0.654988	0.948675	0.431794	0.0746848	Q99NH0	Ankrd17 Foe Gtar Kiaa0697
TRINITY_DN13748_c0_g1	-0.673077	0.0122994	-0.223845	-0.180968	0.324452	Q8BXA0	Lrfn5 Kiaa4208 Salm5
TRINITY_DN1375_c0_g1	1.1959	0.0621176	-0.218384	0.264221	0.00336774	Q8BRF7	Scfd1 Stxbp1l2
TRINITY_DN13751_c0_g1	-0.592566	0.771544	-0.0530296	-0.17351	0.119086	Q9R087	Gpc6
TRINITY_DN13753_c0_g1	0.905141	0.100926	0.052512	0.204113	0.03224	Q6P8I6	Cox11
TRINITY_DN13755_c0_g1	-1.22802	1.33756	0.486207	0.342269	0.407942	P0CG49	Ubb
TRINITY_DN137573_c0_g1	-0.0722039	0.867168	1.9305	-0.326604	0.829698	Q9CU62	Smc1a Sb1.8 Smc1 Smc1l1 Smcb
TRINITY_DN13762_c0_g1	-0.366988	-0.302668	-0.139077	0.17096	0.799425	O54983	Crym
TRINITY_DN13765_c0_g1	-0.429645	-0.284245	-0.124502	-0.727023	0.944532	P49446	Ptpre Ptpe
TRINITY_DN13768_c0_g2	1.10662	1.29708	3.03289	2.39635	0.00732284	Q64374	Rgn Smp30
TRINITY_DN1377_c0_g2	1.67653	1.34827	1.61468	1.84157	0.000159373	Q8C165	Pm20d1
TRINITY_DN137738_c0_g1	1.07736	2.24015	-1.59214	0.843413	#N/A	Q9DBI0	Tmprss6
TRINITY_DN13774_c0_g1	-2.89536	-4.43351	-0.951706	0.0364194	0.664713	Q9WTK7	Stk11 Lkb1
TRINITY_DN13774_c0_g2	-1.49894	-1.8069	-1.90294	-0.506102	0.91241	Q9EQY0	Ern1 Ire1
TRINITY_DN13776_c0_g1	2.19361	1.4144	1.34955	1.32862	0.00667624	Q9R1X5	Abcc5 Abcc5a Mrp5
TRINITY_DN13777_c0_g1	0.131231	-0.570556	1.3638	0.843743	0.424807	Q9WU19	Hao1 Gox1 Hao-1
TRINITY_DN13781_c0_g1	1.00997	0.593667	0.426716	0.553673	0.505924	Q8BGH2	Samm50
TRINITY_DN13782_c0_g1	-0.544125	-0.0994494	-0.258888	0.346261	0.777787	Q99LR1	Abhd12
TRINITY_DN13784_c0_g1	-5.03399	-1.28183	-4.33314	-6.20691	7.74254e-05	O88307	Sorl1
TRINITY_DN137875_c0_g1	-3.52657	-0.129767	-1.81132	-0.902282	0.445377	Q8R3H7	Hs2st1 Hs2st
TRINITY_DN13789_c0_g1	-3.72807	-2.46902	0.72887	-1.12701	0.103308	Q2LKU9	Nlrp1a Card7 Nalp1 Nalp1a Nlrp1
TRINITY_DN1379_c0_g1	0.721479	1.00314	1.49632	0.801602	0.134888	Q9JHF7	Hpgds Gsts Pgds Ptgds2
TRINITY_DN1379_c0_g2	1.07615	0.817206	0.689353	0.531849	0.377521	O09053	Wrn
TRINITY_DN13791_c0_g1	-0.540265	-5.27447	-5.13861	-1.23585	#N/A	Q9JLG8	Capn15 Solh
TRINITY_DN13795_c0_g1	-0.229684	0.955909	-2.14388	-1.42334	0.0717203	Q01705	Notch1 Motch
TRINITY_DN13796_c1_g1	0.800794	0.395259	0.0813745	0.06798	0.152421	Q6DID7	Wls Gpr177
TRINITY_DN138_c3_g1	0.441699	-1.35772	0.788964	0.974048	0.493239	Q14DL3	Lrriq3 Lrrc44
TRINITY_DN1381_c0_g1	0.0279059	1.32857	-0.0633491	0.781939	0.512992	D3YXG0	Hmcn1
TRINITY_DN13812_c0_g1	-6.91842	-8.74652	-2.70137	-1.19875	0.000176481	P12804	Fgl2 Fiblp
TRINITY_DN13818_c0_g1	0.0410208	-0.880381	-0.215382	-0.806894	0.822096	Q5SS80	Dhrs13 Sdr7c5
TRINITY_DN1382_c0_g1	0.373232	-0.0722928	0.0590376	0.129382	0.857092	Q9JLJ2	Aldh9a1
TRINITY_DN13822_c0_g1	-2.52796	-2.10798	-0.621155	-0.470057	0.112964	Q7TPG5	Tafa4 Fam19a4
TRINITY_DN138244_c0_g1	2.55403	-0.847855	4.93999	3.49899	#N/A	Q8C3F7	Klhl30
TRINITY_DN13826_c0_g1	0.356663	0.818101	0.999813	1.02359	0.00998258	Q710D3	Unc93a
TRINITY_DN13827_c0_g1	-1.01852	-0.682951	-0.681291	-0.72004	0.512311	Q91VM3	Wdr45 DXImx38e Wdrx1 Wipi4
TRINITY_DN13829_c0_g1	1.20181	0.652158	1.15654	1.35213	0.190839	O35654	Pold2
TRINITY_DN1383_c0_g1	0.304693	-0.108084	-0.138898	-0.0708764	0.861666	Q5SRY7	Fbxw11 Btrcp2 Fbw1b Fbxw1b
TRINITY_DN1383_c0_g2	-0.369709	-0.447384	-1.03824	-1.08074	0.00457278	Q5SRY7	Fbxw11 Btrcp2 Fbw1b Fbxw1b
TRINITY_DN13831_c0_g1	-5.52634	-0.751523	0.00657685	1.45926	0.237742	Q61084	Map3k3 Mekk3
TRINITY_DN13832_c0_g1	1.40602	0.355935	0.32774	-1.49425	0.135484	Q6T3U4	Npc1l1
TRINITY_DN13834_c0_g1	-1.55786	-0.366772	0.474972	0.561016	0.0452135	E9Q4F2	Klhl18
TRINITY_DN13838_c0_g1	-6.98715	-2.76389	-0.145792	0.415826	2.23308e-06	Q9D5Y0	0
TRINITY_DN13845_c0_g1	2.04339	2.96638	1.77121	2.35771	#N/A	Q8CJ78	Znf628 Zec Zfp628
TRINITY_DN13845_c0_g3	3.5143	2.75286	1.96799	2.89627	0.488354	Q61116	Znf235 Zfp93
TRINITY_DN13846_c0_g1	-0.471007	0.622277	0.0783046	-0.159583	0.627813	Q9JHW2	Nit2 D16Ertd502e
TRINITY_DN1385_c0_g1	0.309135	1.97739	0.165326	0.354642	0.000135335	P20152	Vim
TRINITY_DN1385_c0_g2	0.642958	0.940588	-0.483428	0.974312	0.187033	P20152	Vim
TRINITY_DN13851_c0_g1	-8.89938	1.13476	0.503969	1.46156	0.0315247	Q9EQY0	Ern1 Ire1
TRINITY_DN13854_c0_g1	-0.968615	1.59643	1.00994	2.54185	0.223385	Q9CR40	Klhl28 Btbd5
TRINITY_DN13855_c0_g1	-3.03031	-0.557174	0.544153	0.360956	0.00676766	P70389	Igfals Albs Als
TRINITY_DN1386_c0_g1	0.983886	0.899408	0.044863	0.83188	0.00989521	Q8BTQ0	PcgF3 Rnf3 Rnf3a
TRINITY_DN13860_c0_g1	-1.18107	-2.0877	-0.210984	-0.954363	0.460063	P61458	Pcbd1 Dcoh Pcbd
TRINITY_DN13861_c0_g1	-0.128183	2.51285	2.54515	0.781607	0.0610534	Q2PZL6	Fat4 Fatj
TRINITY_DN13863_c0_g1	1.70755	0.649966	0.957274	1.04743	0.260341	Q9CYW4	Hdhd3
TRINITY_DN13869_c0_g1	-3.93343	-0.819891	-2.85276	-1.82627	0.151975	Q3SXB8	Colec11
TRINITY_DN1387_c0_g1	1.29995	0.549439	0.397563	0.518532	0.284544	Q9D7G0	Prps1
TRINITY_DN13872_c1_g2	1.60204	0.102861	-0.144567	0.0949479	0.00478596	Q9R0B7	Znf346 Jaz Zfp346
TRINITY_DN13877_c0_g1	-0.201704	0.994935	1.34938	1.02636	0.000581571	P34914	Ephx2 Eph2
TRINITY_DN13879_c0_g1	0.406006	-5.60562	-2.26625	-5.61023	#N/A	Q8R1M0	Hmces Srap1 Srapd1
TRINITY_DN13881_c0_g1	0.442109	0.141275	0.00346151	0.507284	0.452491	P11983	Tcp1 Cct1 Ccta
TRINITY_DN138841_c0_g1	-0.536573	4.33194	0.154565	2.45448	#N/A	Q9JHA8	Vwa7 D17h6s56e-3 G7c
TRINITY_DN13887_c0_g1	0.732037	0.274741	3.23882	0.260398	0.124062	Q8BR93	Harbi1
TRINITY_DN1389_c0_g1	-1.42105	-0.884997	-1.45346	-1.65228	0.000414252	O35988	Sdc4
TRINITY_DN138976_c0_g1	4.20523	4.75511	1.3189	3.5706	#N/A	P07146	Prss2 Try2
TRINITY_DN139_c0_g1	0.330922	-0.0166903	-0.496912	-0.985633	0.423819	O35130	Emg1 C2f Grcc2f
TRINITY_DN1390_c0_g1	1.64624	0.619638	0.243888	0.00367001	0.000834609	Q8VHT7	Gtf3a
TRINITY_DN13904_c0_g1	-7.31596	-0.675849	-6.98496	0.301399	0.450512	Q0V8T9	Cntnap5a Caspr5-1
TRINITY_DN13905_c0_g1	-0.951546	-0.58122	-1.31406	-0.523138	0.979707	Q8K010	Oplah
TRINITY_DN13906_c0_g1	0.650253	-1.08806	-1.01101	0.283459	0.882694	Q8CF98	Colec10 Cll1
TRINITY_DN1391_c0_g1	-0.0197246	0.320012	-0.313853	-0.677222	0.695744	Q99MR3	Slc12a9 Cip1 Slc12a8
TRINITY_DN13911_c0_g1	-2.676	-4.11324	-3.0421	-1.88089	0.152122	P51678	Ccr3 Cmkbr1l2 Cmkbr3
TRINITY_DN13914_c0_g1	0.453954	0.0806041	0.269624	0.252507	0.920807	Q9Z0F0	B3galt4
TRINITY_DN1392_c0_g1	-2.13982	-2.55734	-2.13435	-1.25843	0.00440798	Q99LH2	Ptdss1 Pssa
TRINITY_DN13921_c0_g1	-2.63781	-1.04215	-1.81336	-2.03911	0.302676	P46099	Klf1 Elkf
TRINITY_DN13927_c1_g1	-4.14415	-3.31627	-1.86239	-0.852978	0.00412598	A6H603	Nwd1
TRINITY_DN13929_c0_g1	0.575328	0.0259042	1.78748	2.51613	0.328366	Q6TDP3	Klhl17
TRINITY_DN13930_c0_g1	9.08143	5.92228	5.6901	7.75947	2.5494e-08	O88621	Foxh1 Fast1 Fast2
TRINITY_DN13935_c0_g1	-2.4536	-1.12114	-1.7886	-1.85112	0.0749333	Q3V1H3	Hephl1 Gm509
TRINITY_DN13936_c0_g1	-1.94666	-0.498084	-0.852465	-0.540479	0.61722	A2AVA0	Svep1
TRINITY_DN13938_c0_g1	-0.805166	0.054928	0.363661	0.14382	0.677022	Q9CPT3	Nanp Hdhd4
TRINITY_DN1394_c0_g1	-3.81162	0.44204	1.51934	1.29887	7.83754e-07	Q8BGA3	Lrrtm2 Kiaa0416
TRINITY_DN13940_c0_g1	-0.150717	1.95416	0.762154	0.916479	0.110762	Q8BUL5	Klhl7
TRINITY_DN13941_c0_g1	-0.197444	0.259151	0.0918071	0.460959	0.978117	Q0P5X1	Lrriq1
TRINITY_DN13944_c1_g1	-1.99946	1.60036	0.858886	0.497554	0.511065	Q9WTN6	Slc22a21 Octn3 Slc22a9
TRINITY_DN13945_c0_g2	-6.61741	-1.73355	-8.87099	-9.01146	0.00352984	Q80YX1	Tnc Hxb
TRINITY_DN13948_c0_g1	-0.725583	1.35019	1.46098	0.00847774	0.123164	O35599	Opn1mw Gcp
TRINITY_DN13949_c1_g2	0.379601	1.38555	0.170412	-1.09367	#N/A	Q80WQ9	Zbed4 Kiaa0637
TRINITY_DN1395_c0_g1	-0.180979	0.880903	-0.443738	-0.276976	0.672805	Q80T79	Csmd3 Kiaa1894
TRINITY_DN13951_c2_g1	3.86176	4.43684	1.26138	0.971434	#N/A	Q99KD5	Unc45a Smap1
TRINITY_DN13952_c0_g2	2.49605	0.148147	0.848865	-0.339203	0.0568728	Q7M732	Rtl1 Mar1 Mart1 Peg11
TRINITY_DN13955_c0_g1	0.132178	-0.473413	-1.29288	-0.851968	0.797831	Q8K010	Oplah
TRINITY_DN13957_c0_g1	-1.61787	-1.23431	0.928425	-0.804515	0.333428	Q8CE33	Klhl11
TRINITY_DN13966_c0_g1	2.2637	3.87044	2.60773	3.53407	0.126455	Q5XPT3	Large2 Gyltl1b
TRINITY_DN13967_c0_g1	-0.435153	-0.181344	-0.176141	-0.162792	0.906736	Q497V6	Bahd1 Gm117 Kiaa0945
TRINITY_DN13969_c0_g1	0.318237	-0.0270474	-0.306811	-0.116264	0.53845	Q8K1A5	Tmem41b D7Ertd743e Kiaa0033
TRINITY_DN139712_c0_g1	-1.62487	-1.1281	-0.340208	-1.77688	0.965805	P21956	Mfge8
TRINITY_DN139763_c0_g1	0.288707	0.99812	0.736381	0.152648	0.967068	Q8BZM0	Klhl12 C3ip1
TRINITY_DN13979_c0_g1	0.528997	-0.222256	-0.681486	0.0265382	0.122231	Q8CIG8	Prmt5 Jbp1 Skb1
TRINITY_DN1398_c0_g1	1.72669	0.667983	0.700067	0.333012	0.105019	Q9WUR2	Eci2 Peci
TRINITY_DN1399_c0_g1	0.904307	0.456167	0.0752202	-0.16855	0.583201	Q9DCL9	Paics
TRINITY_DN13990_c0_g1	-1.04064	-0.925703	-0.995612	-1.27353	0.145862	Q06649	Sh3bp2 3bp2
TRINITY_DN13996_c0_g1	-1.97619	1.28626	1.0685	0.616277	0.277641	Q9Z100	Cpxm1 Cpx1 Cpxm
TRINITY_DN13999_c0_g1	-1.31938	-0.285395	-1.30366	-0.866175	0.0543698	Q8BMQ3	Bnc2
TRINITY_DN14_c0_g1	1.14332	0.966638	1.30006	0.775713	0.63028	Q8VHI5	Vit Akh
TRINITY_DN140_c0_g1	0.0967469	-0.340925	-0.194703	-0.572028	0.203959	Q9JKZ2	Slc5a3
TRINITY_DN1400_c0_g1	-2.33306	-0.737386	0.225926	-0.273396	0.00202542	Q923D2	Blvrb
TRINITY_DN14001_c0_g1	-0.065775	1.0603	1.55346	1.31402	#N/A	Q8BZM0	Klhl12 C3ip1
TRINITY_DN14001_c1_g1	-1.48895	-0.542735	-0.0737512	-1.22058	0.734002	Q8CE33	Klhl11
TRINITY_DN14003_c0_g1	1.31885	0.958944	1.01961	0.933624	0.331626	O88508	Dnmt3a
TRINITY_DN140068_c0_g1	1.59961	1.46572	0.590466	-0.427614	0.588987	Q91WU5	As3mt Cyt19
TRINITY_DN140095_c0_g1	-0.361101	1.27485	1.04538	0.62108	#N/A	Q62120	Jak2
TRINITY_DN1401_c0_g2	-0.0787244	-1.4778	-0.335513	0.196984	0.350149	Q6SP97	Enkur
TRINITY_DN14017_c0_g1	4.18577	-0.529374	-0.694238	-3.68273	0.00389391	P69525	Tmprss9
TRINITY_DN14022_c0_g1	-0.741204	0.00963747	0.156835	0.0517767	0.820307	P97479	Myo7a Myo7
TRINITY_DN1403_c0_g1	0.472065	-0.661255	-0.409986	-0.269736	0.105616	B1AQJ2	Usp36 Kiaa1453
TRINITY_DN140303_c0_g3	0.831802	1.31149	2.72097	2.14313	#N/A	E0CZ16	Klhl3
TRINITY_DN14031_c0_g1	-1.03564	-0.708077	-0.311545	-0.311484	0.0355422	P97494	Gclc Glclc
TRINITY_DN14031_c0_g2	-0.188542	0.245581	1.36388	1.02206	#N/A	P97494	Gclc Glclc
TRINITY_DN140378_c0_g1	-0.170516	-0.924367	-0.387062	-0.0100666	0.455791	Q9D4C6	Lrp2bp
TRINITY_DN1404_c0_g1	-0.37701	-0.319707	-0.513484	-0.659926	0.491477	Q3TKT4	Smarca4 Baf190a Brg1 Snf2b Snf2l4
TRINITY_DN14044_c0_g1	-1.62639	1.23512	0.454301	1.06659	0.927038	Q8BJR6	Prss27 Mpn
TRINITY_DN14045_c0_g1	-0.384968	0.920558	0.508604	-0.2524	0.776829	P58735	Slc26a1 Sat1
TRINITY_DN1405_c0_g1	0.71644	1.41414	1.35985	1.34064	3.54081e-09	P02469	Lamb1 Lamb-1 Lamb1-1
TRINITY_DN14052_c0_g1	2.89506	1.74004	0.92982	1.37015	0.00019175	P35455	Avp
TRINITY_DN1406_c0_g1	0.465504	-0.174884	0.0753903	-0.39789	0.404396	Q9CXG3	Ppil4
TRINITY_DN1406_c3_g1	0.790699	0.308957	0.170483	0.440903	0.344595	Q9JLZ3	Auh
TRINITY_DN14065_c0_g1	1.22347	0.461384	0.52584	1.89307	0.388371	E0CZ16	Klhl3
TRINITY_DN1407_c0_g1	1.01333	0.572784	0.256081	0.499057	0.0290086	Q9WUK4	Rfc2
TRINITY_DN14070_c0_g1	-0.624011	-2.59989	-1.06988	-2.11718	0.31145	P63017	Hspa8 Hsc70 Hsc73
TRINITY_DN14073_c0_g1	-0.635391	-0.0717543	-0.337921	-0.0320352	0.572467	O35632	Hyal2
TRINITY_DN14077_c0_g1	-1.19737	-3.0093	-0.415513	0.463845	0.631864	E9Q555	Rnf213 Mystr
TRINITY_DN1408_c0_g1	-0.467895	-0.134194	-0.526604	-0.648913	0.70552	O70497	Fcn2 Fcnb
TRINITY_DN14081_c0_g1	1.30309	-0.457925	-0.0707269	0.897452	0.0206558	Q9CWQ0	Dph5
TRINITY_DN14082_c0_g1	-2.01443	0.00991811	0.978229	-0.19413	0.811651	Q8BVI4	Qdpr Dhpr
TRINITY_DN1409_c0_g1	-1.93807	-0.768001	-0.306284	-0.31728	0.00413497	Q8C3L1	Ssuh2 Ssu2
[truncated: 10,556 more rows]

## Sheet: Count_matrix
GeneID	brain_day0_S1	brain_day0_S2	brain_day0_S3	brain_day2_S8	brain_day2_S9	brain_day7_S14	brain_day7_S15	brain_day14_S19	brain_day14_S20	brain_day14_S21	brain_day21_S25	brain_day21_S26
TRINITY_DN123425_c0_g1	0	0	0	0	28	0	7	0	0	0	0	0
TRINITY_DN17896_c0_g2	0	0	0	0	3	14	40	0	0	0	0	0
TRINITY_DN39071_c0_g3	0	0	0	0	0	18	16	0	0	0	0	0
TRINITY_DN43763_c0_g1	0	0	0	8	11	0	0	0	0	0	0	0
TRINITY_DN31815_c0_g1	1	0	0	1	24.639	0	12	0	0	0	0	0
TRINITY_DN23543_c0_g1	1.977	0	0	9.349	0	6	0	0	0	0	0	0
TRINITY_DN29490_c0_g1	2	0	0	0	10	8	0	0	0	0	0	0
TRINITY_DN12305_c0_g1	51	0	0	0	0	0	490	0	0	0	0	0
TRINITY_DN37316_c0_g1	0	1	0	0	6	6	0	0	0	0	0	0
TRINITY_DN21327_c0_g1	63	4	0	0	0	0	529.002	0	0	0	0	0
TRINITY_DN88009_c0_g1	8.577	5	0	7.001	6	0	2	0	0	0	0	0
TRINITY_DN102611_c0_g1	0	6	0	8	0	8	0	0	0	0	0	0
TRINITY_DN61815_c0_g1	1	6	0	26	0	0	0	0	0	0	0	0
TRINITY_DN34189_c0_g1	0	7	0	2	0	9	0	0	0	0	0	0
TRINITY_DN22115_c0_g1	0	9	0	0	11	0	0	0	0	0	0	0
TRINITY_DN74371_c0_g1	0	11	0	0	0	7	0	0	0	0	0	0
TRINITY_DN76166_c0_g1	0	23	0	0	0	0	12	0	0	0	0	0
TRINITY_DN25353_c0_g1	0	29	0	0	0	0	49	0	0	0	0	0
TRINITY_DN31404_c1_g1	2	32	0	15	24	0	0	0	0	0	0	0
TRINITY_DN11165_c0_g2	213.298	101.16	0	0	1	7	23	0	0	0	0	0
TRINITY_DN2910_c0_g2	109	168	0	0	0	0	270.999	0	0	0	0	0
TRINITY_DN26680_c0_g1	0	0	1	19	0	0	48	0	0	0	0	0
TRINITY_DN62265_c0_g1	0	0	3	14	1	27	0	0	0	0	0	0
TRINITY_DN35326_c0_g1	8	22	3	4	13	15	14	0	0	0	0	0
TRINITY_DN42473_c0_g2	0	0	6	0	0	0	12	0	0	0	0	0
TRINITY_DN19331_c0_g1	0	0	9	0	23	0	13	0	0	0	0	0
TRINITY_DN35923_c0_g1	0	0	10	0	18.091	0	0	0	0	0	0	0
TRINITY_DN611_c2_g2	14	69	10	1	0	0	7	0	0	0	0	0
TRINITY_DN30336_c0_g2	14	0	11	0	0	0	0	0	0	0	0	0
TRINITY_DN40667_c1_g2	0	0	12	0	3	0	17	0	0	0	0	0
TRINITY_DN16586_c0_g2	0	0	13	0	4	0	8	0	0	0	0	0
TRINITY_DN17495_c0_g1	0	0	13	0	0	9	0	0	0	0	0	0
TRINITY_DN23383_c0_g1	0	0	13	0	0	6	0	0	0	0	0	0
TRINITY_DN89160_c0_g1	0	0	13	0	11	0	15	0	0	0	0	0
TRINITY_DN17910_c0_g1	0	0	16	0	0	12	0	0	0	0	0	0
TRINITY_DN12901_c2_g1	8	0	19	0	0	0	78	0	0	0	0	0
TRINITY_DN41445_c0_g1	0	0	19.945	34.829	0	0	15.784	0	0	0	0	0
TRINITY_DN67605_c0_g1	2	0	20	0	38	0	16	0	0	0	0	0
TRINITY_DN71981_c0_g1	0	0	21	6	1	0	3	0	0	0	0	0
TRINITY_DN31099_c0_g1	0	0	23	0	0	31	0	0	0	0	0	0
TRINITY_DN12984_c0_g1	0	0	28	0	0	12	0	0	0	0	0	0
TRINITY_DN191365_c0_g1	0	0	29	19	0	0	0	0	0	0	0	0
TRINITY_DN38000_c0_g2	0	5	105	0	0	26	0	0	0	0	0	0
TRINITY_DN13945_c0_g2	29	26	139	2	0	0	55	0	0	0	0	0
TRINITY_DN3029_c1_g2	145	0	155	0	0	0	550	0	0	0	0	0
TRINITY_DN234934_c0_g1	20	0	185	0	0	0	0	0	0	0	0	0
TRINITY_DN14431_c0_g1	7	0	229	0	67	0	0	0	0	0	0	0
TRINITY_DN13722_c0_g1	0	2	229	0	23	100	0	0	0	0	0	0
TRINITY_DN44669_c0_g1	0	170	279	1	0	0	0	0	0	0	0	0
TRINITY_DN58066_c0_g1	0	0	450.003	0	0	0	228	0	0	0	0	0
TRINITY_DN38339_c0_g2	9.977	2.066	202.593	0	3	8.976	3	0	0	0	0	0.993
TRINITY_DN942_c0_g2	0	1236.02	1	143.227	917	5422	0	0	0	0	0	1
TRINITY_DN5771_c0_g1	7	0	0	0	0	8	2	0	0	0	0	2
TRINITY_DN22885_c0_g1	0	0	0	7	15	0	5	0	0	0	0	3
TRINITY_DN71089_c0_g1	0	2	0	1	0	7	11	0	0	0	0	3
TRINITY_DN16701_c2_g1	0	9	0	1	15	0	0	0	0	0	0	3
TRINITY_DN65042_c1_g1	1	0	2	6	11	0	0	0	0	0	0	3
TRINITY_DN103074_c0_g1	5	3	2	4	2	20	10	0	0	0	0	4
TRINITY_DN46274_c0_g1	0	6	7	1	0	0	0	0	0	0	0	4
TRINITY_DN29688_c0_g2	0	0	0	18	6	0	1	0	0	0	0	5
TRINITY_DN77130_c0_g1	0	0	9	0	0	0	0	0	0	0	0	6
TRINITY_DN32885_c0_g1	0	0	0	0	16	0	0	0	0	0	0	7
TRINITY_DN148974_c0_g1	0	0	8	0	0	0	8.118	0	0	0	0	7
TRINITY_DN18785_c0_g1	0	0	0	25	0	0	3	0	0	0	0	8
TRINITY_DN82388_c0_g1	0	0	0	0	7	0	0	0	0	0	0	8
TRINITY_DN31343_c0_g1	14	2	1	0	0	0	0	0	0	0	0	8
TRINITY_DN36375_c0_g1	0	3	0	28	16	5	1	0	0	0	0	9
TRINITY_DN28568_c0_g1	1	7	0	36	0	0	0	0	0	0	0	10
TRINITY_DN38806_c0_g1	5	1	74	6	0	0	0	0	0	0	0	10
TRINITY_DN23275_c0_g2	7	2	4	0	0	4	0	0	0	0	0	11
TRINITY_DN15225_c0_g2	14	0	2	3	0	0	0	0	0	0	0	18
TRINITY_DN16844_c0_g1	0	0	4.823	0	8.993	0	0	0	0	0	0	18
TRINITY_DN43489_c0_g1	0	0	0	0	0	43	0	0	0	0	0	21
TRINITY_DN12920_c0_g2	3	21	0	7	0	12	0	0	0	0	0	21
TRINITY_DN83355_c0_g1	6	24	0	0	0	0	0	0	0	0	0	21
TRINITY_DN88792_c0_g1	26	0	6	0	0	0	0	0	0	0	0	21
TRINITY_DN12901_c1_g1	0	0	0	0	0	0	6	0	0	0	0	23
TRINITY_DN233158_c0_g1	0	0	0	0	30	0	0	0	0	0	0	23
TRINITY_DN154365_c0_g1	0	0	0	0	0	0	24	0	0	0	0	31
TRINITY_DN18153_c0_g1	2.121	37	0	21	0	29	0	0	0	0	0	32.813
TRINITY_DN258557_c0_g1	0	0	0	0	0	58	0	0	0	0	0	47
TRINITY_DN12968_c0_g2	30	2	263	51	1	1	0	0	0	0	0	54
TRINITY_DN13904_c0_g1	4	0	0	0	0	17	40	0	0	0	0	54.001
TRINITY_DN1234_c1_g1	0	0	123	2	0	0	0	0	0	0	0	74
TRINITY_DN3370_c0_g2	0.5	0	0	538.73	289.61	0	36	0	0	0	0	112
TRINITY_DN2002_c0_g1	63	0	452.987	138	226	398	408	0	0	0	0	209
TRINITY_DN20630_c1_g1	76	1	0	0	0	0	0	0	0	0	0	251
TRINITY_DN45482_c0_g1	0	1	10.286	3	9	12	9	0	0	0	1	0
TRINITY_DN22448_c0_g1	1	28.001	13	0	9.025	33.994	2	0	0	0	1	0
TRINITY_DN40978_c0_g1	1	2	6	1	3	12	0	0	0	0	1	1
TRINITY_DN39961_c0_g2	0	0	0	9	17	0	3	0	0	0	1	2
TRINITY_DN22476_c0_g1	32.005	36	40	0	10	16.097	28	0	0	0	1	2
TRINITY_DN12943_c0_g1	0	10	0	3	3	6	3	0	0	0	1	6
TRINITY_DN60723_c0_g2	1	2	17	0	13	0	5	0	0	0	1	6
TRINITY_DN31130_c1_g4	4	0	113.517	5	0	0	119.002	0	0	0	1	27
TRINITY_DN21240_c0_g1	0	0	16.026	22	7	2	5	0	0	0	1.013	12.001
TRINITY_DN27727_c0_g1	1	0	0	0	2.127	16.354	7	0	0	0	1.238	3
TRINITY_DN56466_c0_g1	0	18	0	0	3	1	6.693	0	0	0	2	2
TRINITY_DN54356_c0_g1	3.991	5	14	2	0	10	9	0	0	0	2	3
TRINITY_DN38000_c0_g1	3	1	152	0	0	0	6	0	0	0	3	7
TRINITY_DN111544_c0_g3	1	0	6	0	3	0	7	0	0	0	4	0
TRINITY_DN16376_c0_g1	8	7	1	13	5	2	21	0	0	0	5	0
TRINITY_DN58670_c0_g1	0	0	0	66	85	0	6	0	0	0	5	11
TRINITY_DN43125_c0_g1	0	0	0	0	10	0	0	0	0	0	6	0
TRINITY_DN60738_c0_g1	0	17	38	0	0	0	0	0	0	0	6	0
TRINITY_DN13791_c0_g1	1	7	7.565	8	3	0	0	0	0	0	6.468	1
TRINITY_DN12623_c0_g1	0	0	0	225	231	0	17	0	0	0	7	19
TRINITY_DN158630_c0_g1	0	4	1	0	0	0	7	0	0	0	8	1
TRINITY_DN29008_c0_g1	0	1	0	0	0	14	0	0	0	0	9	0
TRINITY_DN3726_c4_g1	0	1	11	0	0	37	2	0	0	0	9	4
TRINITY_DN30738_c0_g1	0	9	0	0	11	1	4	0	0	0	10	1
TRINITY_DN1109_c2_g2	0	17.213	0	14.081	0	0	8.131	0	0	0	10.725	5.985
TRINITY_DN20525_c0_g1	0	0	0	7	0	0	0	0	0	0	11	0
TRINITY_DN2336_c0_g3	0	0	0	0	0	43	0	0	0	0	14	0
TRINITY_DN18694_c0_g2	0	10	0	0	10.002	0	0	0	0	0	14	0
TRINITY_DN611_c2_g1	0	0	25	0	82	63.156	0	0	0	0	14	0
TRINITY_DN21061_c0_g1	0	6	0	12	0	9	0	0	0	0	15	0
TRINITY_DN20113_c0_g1	0	0	14	0	0	0	0	0	0	0	15	0
TRINITY_DN21136_c0_g1	0	1	0	1	14.995	0	4	0	0	0	16.002	0
TRINITY_DN82912_c1_g2	0	0	0	1	6	19	0	0	0	0	17	0
TRINITY_DN25993_c0_g1	0	61	0	0	18	0	0	0	0	0	17	0
TRINITY_DN41560_c0_g1	0	0	0	8	0	1	0	0	0	0	19	1
TRINITY_DN21433_c0_g1	0	12	0	0	0	14	20.004	0	0	0	19.061	25.61
TRINITY_DN29943_c2_g2	0	1	0	0	6	0	0	0	0	0	20	0
TRINITY_DN84094_c0_g1	0	10	0	0	0	3	17	0	0	0	23	0
TRINITY_DN42280_c0_g3	5	0	0	0	12	16	0	0	0	0	26	9
TRINITY_DN27150_c0_g2	0	0	0	0	0	0	1	0	0	0	27	20
TRINITY_DN12309_c0_g2	0	0	0	0	0	8	0	0	0	0	29	0
TRINITY_DN95199_c0_g1	11	0	0	0	30	12	0	0	0	0	38	16
TRINITY_DN22757_c1_g1	0	0	0	0	1	0	22	0	0	0	39	4
TRINITY_DN31056_c0_g1	0	0	0	0	0	0	0	0	0	0	46	10
TRINITY_DN18212_c0_g2	0	38	0	0	0	0	67	0	0	0	56	0
TRINITY_DN21645_c0_g1	0	1	0	0	0	0	30	0	0	0	59.734	0
TRINITY_DN6623_c0_g2	56	0	0	0	0	85	0	0	0	0	69	0
TRINITY_DN1598_c0_g1	16	1	63.392	16	17.014	0	86.003	0	0	0	76	29
TRINITY_DN14608_c0_g1	0	37	0	0	31	0	0	0	0	0	80	0
TRINITY_DN14643_c1_g1	0	24	0	0	21	0	0	0	0	0	88	0
TRINITY_DN17030_c0_g1	19	2	0	0	0	0	0	0	0	0	97	82.001
TRINITY_DN19617_c0_g1	26	23	183	0	0	0	0	0	0	0	119	15
TRINITY_DN7977_c0_g1	0	178	230	0	0	0	133	0	0	0	126	61
TRINITY_DN57676_c0_g1	20	1	0	0	11	0	0	0	0	0	154	0
TRINITY_DN20215_c1_g1	13	0	0	0	0	71	0	0	0	0	174	0
TRINITY_DN9876_c0_g2	0	0	0	0	30	0	146	0	0	0	189	0
TRINITY_DN51712_c0_g1	0	0	0	0	9	0	0	0	0	0	196	0
TRINITY_DN7635_c1_g1	0	6	257	0	0	0	179	0	0	0	395.999	0
TRINITY_DN21831_c0_g1	0	0	0	0	7	0	0	0	0	0	964	1
TRINITY_DN2522_c1_g1	0	1679.23	0	0	2033	0	0	0	0	0	2004	371
TRINITY_DN11523_c0_g1	52	90	186	8	148.999	4	3	0	0	1	0	0
TRINITY_DN11461_c0_g1	0	127.999	202.999	3	0	0	251	0	0	1	0	0
TRINITY_DN81393_c0_g1	0	0	6	0	1	0	18	0	0	1	0	2
TRINITY_DN4834_c0_g1	41	38.003	68	0	12.816	20.022	91	0	0	1	0	3
TRINITY_DN86051_c0_g1	25	32	0	1	0	33	0	0	0	1	0	7
TRINITY_DN43742_c0_g1	0	0	2	20	7	0	0	0	0	1	0	7
TRINITY_DN107461_c0_g1	0	0	30	0	0	0	0	0	0	1	0	66
TRINITY_DN121453_c0_g1	0	37	3	1	6	0	0	0	0	1	2	1
TRINITY_DN40158_c0_g1	3	11	0	2	2	44	15	0	0	1	3	5
TRINITY_DN21399_c0_g1	0	0	0	111	78.001	1	9	0	0	1	3	7
TRINITY_DN56938_c0_g1	0	6	2	0	0	10	2	0	0	1	4	0
TRINITY_DN1217_c0_g1	12	1	204.483	10	0	0	360.998	0	0	1	4	60
TRINITY_DN16404_c0_g1	0	0	4	3	11	10.558	1	0	0	1	7	1
TRINITY_DN37747_c0_g1	1	5	11	0	0	0	3	0	0	1	7	6
TRINITY_DN10879_c0_g1	0	0	0	144	0	0	6	0	0	1	7	20
TRINITY_DN11719_c0_g1	0	3	0	0	5	1	7	0	0	1	12	6
TRINITY_DN2954_c0_g1	40	200	164	0	2	100	0	0	0	1	364	106
TRINITY_DN11846_c0_g1	0	0	0	0	25	0	0	0	0	1.995	1	16
TRINITY_DN258_c1_g2	0	0	0	51	23	0	1	0	0	2	0	0
TRINITY_DN4655_c1_g2	19	10	33	1	8	4	4	0	0	2	0	0
TRINITY_DN16124_c0_g1	1	34	9	1	1	0	0	0	0	2	0	1
TRINITY_DN89602_c0_g1	0	0	3	15	16	1	9	0	0	2	0	3
TRINITY_DN89981_c0_g1	0	2	0	1	1	2	24	0	0	2	0	7
TRINITY_DN137738_c0_g1	1	2	1	1	11	12	11	0	0	2	0	7
TRINITY_DN30292_c0_g2	0	15	0	1	3	7	5	0	0	2	1	0
TRINITY_DN29109_c0_g1	0	0	0	16.005	16	0	7	0	0	2	1	9
TRINITY_DN185570_c0_g1	0	8	8	0	0	0	0	0	0	2	2	3
TRINITY_DN23842_c0_g1	0	13	18	0	0	0	0	0	0	2	4	0
TRINITY_DN31766_c0_g1	2	6	1	6	0	0	1	0	0	2	5	6
TRINITY_DN212655_c0_g1	0	1	1	4	6	0	1	0	0	2	8	0
TRINITY_DN138976_c0_g1	0	0	0	6	8	8	10	0	0	2	10	0
TRINITY_DN260681_c0_g1	5	0	0	0	0	16	0	0	0	2	11	0
TRINITY_DN29265_c0_g3	1	0	1	0	1	0	12	0	0	2	15	0
TRINITY_DN48885_c0_g3	52.001	7	4	1	3.54	1	1	0	0	3	0	0
TRINITY_DN2460_c8_g1	4	11	11	2	28	1	1	0	0	3	0	0
TRINITY_DN111993_c0_g1	0	0	0	9	14	4	1	0	0	3	2	4
TRINITY_DN23320_c1_g1	0	6	0	0	0	0	0	0	0	3	6	1
TRINITY_DN153945_c0_g1	0	0	0	0	0	0	1	0	0	3	6	10
TRINITY_DN47183_c0_g1	0	0	0	180.137	118	5	33.774	0	0	3	7.361	43.779
TRINITY_DN118565_c0_g1	0	21	9	2	0	0	3	0	0	3	14	10
TRINITY_DN60628_c0_g1	0	0	8	7	0	5	8	0	0	3	17	0
TRINITY_DN10510_c1_g1	9	0	0	0	41	0	0	0	0	3	90	0
TRINITY_DN14487_c0_g1	3.994	11.531	6.23	46.099	0	2	4.835	0	0	3.026	0	10.001
TRINITY_DN40073_c0_g1	0	0	0	55	32	0	3	0	0	3.999	2	18
TRINITY_DN23748_c0_g1	0	0	0	0	12	0	11	0	0	4	0	0
TRINITY_DN43833_c1_g1	0	16	5	11	0	0	10	0	0	4	0	0
TRINITY_DN54531_c0_g1	0	0	1	8	6	1	0	0	0	4	0	4
TRINITY_DN113888_c0_g3	3	6	5	22	3	0	4	0	0	4	1	1
TRINITY_DN23432_c0_g1	1	6	2	11	8	3	4	0	0	4	5	0
TRINITY_DN35209_c1_g1	2	10	22	0	0	0	0	0	0	5	0	0
TRINITY_DN67813_c0_g1	6	0	0	0	3	0	0	0	0	5	0	9
TRINITY_DN60403_c0_g1	0	7	0	30	0	4	0	0	0	5	0	9
TRINITY_DN70080_c0_g1	0	23	36	0	0	0	0	0	0	5	2	0
TRINITY_DN48627_c0_g1	3	7	0	2	6.054	8	0	0	0	5	8	12.562
TRINITY_DN27198_c0_g2	0	0	0	0	0	0	7	0	0	6	0	0
TRINITY_DN76263_c0_g1	0	10	0	0	12	0	0	0	0	6	0	0
TRINITY_DN59313_c0_g1	0	13	0	0	0	0	0	0	0	6	0	0
TRINITY_DN85146_c3_g1	0	5	1	0	7	0	0	0	0	6	0	0
TRINITY_DN209244_c0_g1	0	30	3	1	51	0	4	0	0	6	0	0
TRINITY_DN61637_c0_g2	0	0	0	0	0	0	44	0	0	6	0	2
TRINITY_DN27045_c0_g1	0	0	0	0	9	0	0	0	0	6	1	0
TRINITY_DN38714_c0_g1	0	0	0	0	6	0	0	0	0	6	3	1
TRINITY_DN10285_c1_g1	3	0	6	0	3	0	1	0	0	6	25	0
TRINITY_DN12842_c1_g3	8	7	1	0	0	6	3	0	0	6	71	3
TRINITY_DN24982_c0_g1	2	0	9	0	0	0	0	0	0	6.013	0	10
TRINITY_DN4185_c2_g3	0	0	0	43	212	0	300	0	0	7	0	0
TRINITY_DN18771_c1_g1	0	3	0	37	0	3.995	21	0	0	7	7	1
TRINITY_DN27772_c0_g1	0	24.999	1	1	0	0	0	0	0	7	37	5
TRINITY_DN30057_c0_g1	0	7	71	0	66.999	0	91	0	0	7	149	0
TRINITY_DN8896_c0_g1	5	5	0	1	4	11	92	0	0	8	0	0
TRINITY_DN50102_c0_g1	0	0	3	28.006	0	0	0	0	0	8	0	4.82
TRINITY_DN25606_c0_g1	0	22	3	2	5	10	10	0	0	8	3	3
TRINITY_DN65848_c0_g2	2	0	2	0	0	0	14	0	0	8	4	0
TRINITY_DN26306_c0_g2	0	2	2	2	171	0	24	0	0	8	18	4
TRINITY_DN18926_c0_g3	0	0	0	0	0	0	0	0	0	8	112	0
TRINITY_DN22484_c1_g1	1	7	14.631	33	0	6	1	0	0	9	1	0
TRINITY_DN87012_c0_g1	0	0	0	1	0	0	11	0	0	9	12	0
TRINITY_DN33596_c0_g4	14	4	23	0	0	3	0	0	0	9	70	11
TRINITY_DN7606_c0_g2	0	0	0	0	6.809	79.848	54.78	0	0	9.588	0	0
TRINITY_DN13905_c0_g1	0	9	25	6.992	7	10	5	0	0	10	12	7
TRINITY_DN16890_c0_g1	0	16	0	13	0	0	7	0	0	10	19	7
TRINITY_DN47615_c0_g1	1	0	1.028	0	0	6.001	0	0	0	10.002	5.436	0
TRINITY_DN39966_c0_g1	2	10.676	0	2	1	2	1	0	0	10.996	1	4
TRINITY_DN66138_c0_g1	3	15	0	0	0	0	0	0	0	11	0	0
TRINITY_DN2949_c6_g1	1	4	0	0	0	7	1	0	0	11	3	2
TRINITY_DN22355_c0_g1	3	0	0	0	6	0	0	0	0	12	0	5
TRINITY_DN96805_c0_g2	0	0	1	5	37	4	4	0	0	12	4	7
TRINITY_DN16203_c0_g2	0	17	10	2	29	10	7	0	0	13	0	14
TRINITY_DN41591_c0_g1	3	53	38	1	0	1	1	0	0	13	9	39
TRINITY_DN62506_c0_g1	0	0	0	2	0	0	13.999	0	0	13	15	0
TRINITY_DN16935_c0_g2	0	565	23	164	94	0	0	0	0	14	48	0
TRINITY_DN25201_c0_g1	10	0	0	0	0	0	0	0	0	15	0	0
TRINITY_DN19720_c0_g1	0	10	28	0	0	2	0	0	0	15	0	0
TRINITY_DN8295_c0_g2	0	0	0	1	0	0	16	0	0	15	0	10
TRINITY_DN75894_c0_g2	0	3	0	1	0	0	0	0	0	15	9	7
TRINITY_DN100078_c0_g1	2	0	0	1	0	3	5	0	0	15	14	0
TRINITY_DN8295_c0_g1	0	0	0	0	0	0	35	0	0	16	0	13
TRINITY_DN113335_c0_g1	9	0	11	0	0	3	25	0	0	16	7	12
TRINITY_DN11165_c1_g1	0	0	0	0	0	0	0	0	0	16	272	0
TRINITY_DN24715_c0_g1	19	1	15	0	0	8	0	0	0	17	0	0
TRINITY_DN7330_c0_g1	2	6	0	1	13	9	11	0	0	18	27.001	6
TRINITY_DN77850_c0_g1	1	114	10	0	1	2	4	0	0	19	9	4
TRINITY_DN64526_c0_g1	4	5	0	1	0	1	10	0	0	19	12	0
TRINITY_DN126498_c0_g1	2	0	4	0	0	4	0	0	0	21	0	10
TRINITY_DN62518_c0_g1	0	224	7	0	0	4	2	0	0	21	39	6
TRINITY_DN12514_c0_g1	5	31	0	0	37	21	45.999	0	0	21	69	19
TRINITY_DN16528_c1_g1	0	1	20	0	4	0	0	0	0	21	93	0
TRINITY_DN130239_c0_g1	0	0	0	0	0	1	0	0	0	21	98	0
TRINITY_DN19794_c0_g1	3	73	52	45	78	26	16	0	0	24	7	9
TRINITY_DN9265_c0_g2	0	0	0	0	0	0	0	0	0	24	351.964	0
TRINITY_DN53848_c0_g1	0	0	0	0	0	0	0	0	0	31	0	30
TRINITY_DN141_c0_g3	0	240	234	2	1	0	0	0	0	32	28	44
TRINITY_DN5272_c1_g1	29.999	118.999	0	2	109	103	69	0	0	33	105	69
TRINITY_DN30331_c0_g1	0	105	80.999	34	50	45	0	0	0	34	0	0
TRINITY_DN32903_c0_g1	0	0	11	0	0	0	0	0	0	44	0	0
TRINITY_DN9984_c0_g1	0	77	0	20	35.999	0	0	0	0	44	63	32.001
TRINITY_DN43839_c0_g1	0	22	27	1	0	0	1	0	0	45	7	6
TRINITY_DN22919_c0_g1	4	26.001	104	3	0	15	0	0	0	50.999	0	0
TRINITY_DN32318_c0_g1	0	0	56	2	0	0	0	0	0	56	0	0
TRINITY_DN10167_c0_g1	0	14	88	0	0	0	59	0	0	57	118	21
TRINITY_DN37354_c0_g1	23	0	0	100	44	0	0	0	0	59	0	0
TRINITY_DN30257_c0_g1	0	113	154	0	0	0	1	0	0	63	42	55
TRINITY_DN8295_c0_g3	0	0	0	0	0	0	173	0	0	65	0	0
TRINITY_DN30116_c0_g1	14	0	0	0	0	0	0	0	0	72	0	0
TRINITY_DN19622_c0_g2	0	0	0	0	21	0	0	0	0	74	0	0
TRINITY_DN13093_c1_g1	0	145	0	10	24.312	123	0	0	0	74	277	18
TRINITY_DN24777_c0_g1	1.279	0	6	0	0	0	0	0	0	75	0	9
TRINITY_DN35221_c0_g1	14.999	0	1	0	0	0	0	0	0	115.999	0	0
TRINITY_DN3939_c1_g1	0	34	206.454	0	204.832	0	83.975	0	0	116.186	139	0
TRINITY_DN6382_c0_g2	0	75	178	0	0	0	0	0	0	131	51	80
TRINITY_DN49825_c0_g2	0	0	85	0	0	0	55	0	0	146	0	0
TRINITY_DN12176_c0_g1	20	22	70.999	35	240	0	16	0	0	151	0	25
TRINITY_DN6580_c0_g1	0	0	217	0	35	0	138.999	0	0	211.999	0	0
TRINITY_DN2035_c0_g1	0	0	0	0	0	56.999	0	0	0	310	1131.61	287
TRINITY_DN11446_c0_g1	15	55.999	157.999	22	0	35	0	0	0	324	0	29
TRINITY_DN51847_c0_g2	41	0	118.999	0	0	154	0	0	0	381	0	0
TRINITY_DN2002_c0_g2	0	217	365	0	0	3	362	0	0	429	736.036	194.003
TRINITY_DN17683_c0_g1	2	25	1	2	1	5	19	0	1	0	0	0
TRINITY_DN15434_c0_g1	0	2	12	0	0	13	20	0	1	0	0	0
TRINITY_DN160081_c0_g1	0	1	6	7	9	3	1	0	1	0	0	1
TRINITY_DN75868_c0_g2	0	0	0	27	20	0	1	0	1	0	0	2
TRINITY_DN123938_c0_g1	0	0	0	6	12	0	2	0	1	0	0	3
TRINITY_DN42976_c0_g1	5	89	53	0	0	0	0	0	1	0	0	33
TRINITY_DN67194_c1_g1	0	0	0	7	6	3	0	0	1	0	1	0
TRINITY_DN15579_c0_g1	0	0	0	46	11	0	4	0	1	0	1	3
TRINITY_DN2774_c0_g1	0	4	4	0	0	3	24	0	1	0	1	8
TRINITY_DN17551_c0_g1	16	378.001	115	4	0	1	0	0	1	0	1	65
TRINITY_DN117579_c0_g1	0	26	4	0	0	9	1	0	1	0	2	0
TRINITY_DN70190_c0_g1	0	3	2.001	9	6	6	0	0	1	0	2	2
TRINITY_DN43984_c0_g1	0	0	0	2	8	12	0	0	1	0	4	0
TRINITY_DN40347_c0_g2	0	1	15.996	29.36	6	0	20	0	1	0	4	0
TRINITY_DN3280_c0_g2	0	0	2	0	1	0	8	0	1	0	4	14
TRINITY_DN5496_c0_g2	0	4	15	0	0	1	0	0	1	0	6	3
TRINITY_DN281368_c0_g1	0	173	12	2	0	1	0	0	1	0	7	0
TRINITY_DN24796_c1_g1	1	0	6	6	0	0	6	0	1	0	8	0
TRINITY_DN58802_c0_g1	0	1	0	1	0	13	1	0	1	0	11	1
TRINITY_DN11108_c0_g1	0	3	6	17	9	16	5	0	1	0	15	1
TRINITY_DN121189_c0_g1	1	0	9	0	0	0	0	0	1	0	30	0
TRINITY_DN10733_c0_g3	0	0	0	0	8	0	535	0	1	1	0	0
TRINITY_DN48989_c0_g1	0	8	6	3	0	0	0	0	1	1	0	0
TRINITY_DN13214_c0_g1	4	2	0	11	21	2046	1	0	1	1	0	2
TRINITY_DN34289_c0_g1	1	3	1	1	6	1	2	0	1	1	0	7
TRINITY_DN279283_c0_g1	0	0	0	555	2	0	0	0	1	1	0	90
TRINITY_DN36006_c0_g1	1	1	0	19	4	12	8	0	1	1	1	10
TRINITY_DN19873_c0_g1	0	0	2	6	8	13.001	2	0	1	1	2	2
TRINITY_DN26347_c0_g1	1	0	0	1	7	12.442	0	0	1	1	3	2
TRINITY_DN59778_c0_g1	0	0	2	2	1.658	0	3	0	1	1	10	7
TRINITY_DN89887_c0_g1	0	1	1	4	1	15	3	0	1	1	19	0
TRINITY_DN33126_c0_g2	0	12.495	5.963	0	1	1	1	0	1	1.025	3	0
TRINITY_DN96146_c0_g1	0	2	0	13	0	1	21	0	1	2	0	0
TRINITY_DN8002_c0_g1	0	727	0	6	352	1	0	0	1	2	0	33
TRINITY_DN188802_c0_g1	2	8	0	2	27	2	1	0	1	2	1	1
TRINITY_DN82529_c0_g1	3	12	8	4	1	2	11	0	1	2	2	8
TRINITY_DN19769_c0_g1	2	3	0	8	6	0	3	0	1	2	2	17
TRINITY_DN34760_c0_g1	2	10	35	13	11	7	0	0	1	2	6	2
TRINITY_DN15739_c0_g1	16.001	162	0	0	1	0	0	0	1	3	0	0
TRINITY_DN8677_c0_g1	3	26	2	0	150	1	2	0	1	3	1	0
TRINITY_DN32013_c0_g1	0	0	0	59	127	11	6	0	1	3	402	0
TRINITY_DN108862_c0_g1	0	1	8	0	2	0	8	0	1	4	0	1
TRINITY_DN85081_c0_g1	0	0	12	1	0	6	0	0	1	4	0	12
TRINITY_DN27269_c0_g1	0	16	7	0	0	5	3	0	1	4	4	4
TRINITY_DN88846_c0_g1	1	6	1	1	6	1	0	0	1	5	2	3
TRINITY_DN45079_c0_g1	0	15	22	0	0	2	3	0	1	5	9	14
TRINITY_DN36380_c0_g1	0	0	0	4	7	12	0	0	1	6	1	1
TRINITY_DN6751_c0_g1	0	0	0	0	0	0	0	0	1	6	62	0.921
TRINITY_DN90236_c0_g1	1	6	0	0	0	3	1	0	1	7	1	0
TRINITY_DN64454_c0_g1	1	3	0	0	3	5	2	0	1	8	0	11
TRINITY_DN3665_c0_g1	12.992	31	94	3	38.002	1	5	0	1	8	14	0
TRINITY_DN63991_c0_g2	0	1	1	0	3	1	9	0	1	9	3	15
TRINITY_DN33887_c0_g1	0	0	42	0	52	0	0	0	1	11	0	0
TRINITY_DN30133_c0_g1	0	0	2	0	0	0	3	0	1	11	9	5
TRINITY_DN37105_c0_g1	0	73	93	1	0	1	1	0	1	16	21	40
TRINITY_DN13163_c0_g1	0	19	5	3	1	0	23	0	1	17	8	7
TRINITY_DN19527_c0_g1	11	63.001	0	0	0	0	0	0	1	18	0	0
TRINITY_DN12806_c0_g1	4	26	0	0	12	0	35.037	0	1	24	19	6
TRINITY_DN88919_c0_g1	1	5	3	0	0	2	0	0	1	38	4	26
TRINITY_DN93896_c0_g1	1	0	0	0	0	0	85	0	1	137	0	0
TRINITY_DN6982_c0_g1	0	509	2	20	173	349	0	0	1	155.999	0	0
TRINITY_DN3939_c0_g1	4	187	172.977	130.689	403	2.009	327	0	1	158.999	214.001	78
TRINITY_DN46446_c0_g1	0	0	0	12.135	11	0	3.076	0	1.478	0	0	4
TRINITY_DN77747_c0_g1	0	5	0	1	11	11	4.117	0	1.876	2	1	12
TRINITY_DN50460_c0_g1	0	1	0	0	90	9	0	0	2	0	0	0
TRINITY_DN21874_c0_g1	0	32.999	0	0	6	77	0	0	2	0	0	0
TRINITY_DN56096_c0_g1	2	10	6	16	43	32	10	0	2	0	0	1
TRINITY_DN68533_c1_g1	0	0	0	8	1	3	7	0	2	0	0	2
TRINITY_DN11759_c0_g1	33	365	278	6	24	3	8	0	2	0	1	1
TRINITY_DN87810_c0_g1	0	0	0	35	13	0	6	0	2	0	1	2
TRINITY_DN155264_c0_g1	0	309	22	0	2	0	0	0	2	0	2	0
TRINITY_DN41352_c0_g1	0	0	0	27	16	0	3	0	2	0	3	0
TRINITY_DN10734_c0_g1	0	0	0	199	254	0	20	0	2	0	3	43
TRINITY_DN16370_c0_g1	0	9	1	0	5	1	13	0	2	0	5	0
TRINITY_DN7040_c0_g2	0	0	60	9	0	0	0	0	2	0	20	0
TRINITY_DN26830_c0_g1	8	8	3	0	0	7	1	0	2	0	83	7
TRINITY_DN33385_c0_g1	0	7	0	0	0	24	34	0	2	1	4	0
TRINITY_DN93151_c0_g1	0	1	0	1	12	8	1	0	2	1	6	0
TRINITY_DN19287_c0_g1	0	2	0	82	287	1	19	0	2	1	6	30
TRINITY_DN26345_c1_g1	0	0	2	7	25	3	7	0	2	2	1	0
TRINITY_DN195344_c0_g1	0	0	7	0	0	9	2	0	2	2	4	0
TRINITY_DN10427_c1_g1	0	3	0	0	3	4	5	0	2	2	79.999	10
TRINITY_DN103030_c0_g1	0	12	0	0	6	11	1	0	2	3	0	31
TRINITY_DN22158_c0_g1	0	2	11.982	6	2	0	0	0	2	3	2.995	0
TRINITY_DN19887_c0_g1	1	0	3	180	93	2	18	0	2	3	9	31
TRINITY_DN8075_c0_g3	52	12	91	9	7	7	10	0	2	4	5	3
TRINITY_DN102845_c0_g1	0	0	0	1	1	2	0	0	2	7	2	9
TRINITY_DN15296_c0_g2	4	3	0	13	8	53.001	62	0	2	8	4	9
TRINITY_DN82292_c0_g2	0	12	6	1	3	3	7	0	2	8	14	0
TRINITY_DN30164_c0_g1	20	4	2	3	2	1	8	0	2	10	0	29
TRINITY_DN63183_c0_g1	1	8	6	3	55	53	27	0	2	10	2	1
TRINITY_DN85034_c0_g2	0	4	0	0	6	1	2	0	2	11	0	1
TRINITY_DN31350_c0_g1	0	0	2	1	22	0	5	0	2	11	3	1
TRINITY_DN62604_c0_g1	0	2	0	4	4	5	16	0	2	11	16	19
TRINITY_DN42769_c0_g1	4	0	0	0	0	0	6	0	2	12	0	0
TRINITY_DN47430_c0_g1	0	1	2	10	2	2	29	0	2	13	5	3
TRINITY_DN16864_c1_g1	4	12	8	7.999	36	14	1	0	2	15	3	4
TRINITY_DN69341_c0_g1	0	99	69	0	1	1	1	0	2	15	29	50
TRINITY_DN8665_c0_g1	0	0	13	0	22	6	0	0	2	27	0	5
TRINITY_DN22072_c0_g1	11	333	15	2	25	89	31	0	2	50	6	8
TRINITY_DN48995_c0_g1	0	8.14	1	0	7	1	3	0	2.001	1	0	0
TRINITY_DN22038_c0_g1	0	0	2	5	0	0	16	0	2.002	0	0	5.998
TRINITY_DN43021_c0_g1	2	4	7	0	35	15	4	0	3	0	0	0
TRINITY_DN107447_c0_g1	0	0	0	0	10	2	0	0	3	0	1	7
TRINITY_DN49390_c0_g1	1	0	0	99	133	1	8	0	3	0	2	18
TRINITY_DN25045_c0_g1	0	0	0	0	0	4	14	0	3	0	7.016	2
TRINITY_DN30542_c0_g1	1	0	1	172	125	1	18	0	3	0	11	21
TRINITY_DN8789_c0_g1	0	0	0	153	132	1	23	0	3	0	11	41
TRINITY_DN15285_c0_g2	0	0	50	0	79	51	0	0	3	0	26	1
TRINITY_DN73547_c0_g1	0	1	0	2	4	1	6	0	3	0	29	1
TRINITY_DN11263_c0_g2	2	6	5	10	4	17	36	0	3	0	50	5
TRINITY_DN31567_c0_g1	15	249	1	12	0	1	5	0	3	1	0	1
TRINITY_DN21562_c0_g1	1	1	2	0	13	9	3	0	3	1	2	2
TRINITY_DN35920_c0_g1	0	21.999	92	12	0	6	0	0	3	1	2	6.16
TRINITY_DN19949_c0_g2	0	1	0	18	9	3	5	0	3	1	3	14
TRINITY_DN132106_c0_g1	0	6	1	2	0	12	7	0	3	2	0	4
TRINITY_DN60941_c0_g1	0	0	1	55	32	0	7	0	3	2	3	12
TRINITY_DN2973_c0_g2	0	0	0	116.001	132	4	27	0	3	2	10	23.001
TRINITY_DN22995_c0_g1	0	12	0	40	4	0	30	0	3	3	3	24
TRINITY_DN81384_c0_g1	0	6	8	4	0	1	0	0	3	6	3	11
TRINITY_DN25332_c0_g3	0	0	3	1	1	0	0	0	3	7	6	0
TRINITY_DN17237_c0_g1	19.154	38	2	0	6	33	39	0	3	8	1	13
TRINITY_DN11453_c0_g1	0	12	2	0	0	8	3	0	3	9	24	83
TRINITY_DN54836_c0_g1	1	6	0	1	2	1	0	0	3	11	1	6
TRINITY_DN41790_c0_g1	0	7	8	0	2	6	0	0	3	11	1	7
TRINITY_DN20667_c0_g1	2	0	2	2	1	16	4	0	3	28.001	7	4
TRINITY_DN14564_c0_g1	0	99.999	103	3	1	2	7	0	3	38	40	46.001
TRINITY_DN24993_c0_g1	0	5	3	7	7	7	6	0	3	42	15	52
TRINITY_DN235052_c0_g1	11	0	0	0	0	2	0	0	3	56	5	5
TRINITY_DN82805_c0_g1	2	48	1	15	3	9	2	0	3.89	8	5	0
TRINITY_DN11462_c0_g1	0	9	0	0	0	16	2.987	0	3.985	0	6	5
TRINITY_DN32481_c0_g1	0	7	3	7	0	0	0	0	4	0	0	0
TRINITY_DN104805_c0_g1	0	0	2	0	6	8	0	0	4	0	1	4
TRINITY_DN49977_c0_g1	3	20	0	1	3	8.999	0	0	4	0	4	3
TRINITY_DN22136_c0_g1	0	0	0	218	90	2	4	0	4	0	7	28
TRINITY_DN13489_c0_g1	0	0	0	1	4	0	6	0	4	0	15	0
TRINITY_DN10733_c0_g1	0	10	0	0	0	0	0	0	4	0	329	0
TRINITY_DN6584_c0_g1	0	1	2	330	386	10	27	0	4	3	19	64
TRINITY_DN19036_c0_g1	6	0	0	0	4	0	7	0	4	4	0	0
TRINITY_DN231268_c0_g1	0	3	3	5	9	1	11	0	4	5	1	3
TRINITY_DN64873_c0_g1	0	0	0	0	5	1	0	0	4	5.879	0	6
TRINITY_DN24151_c0_g1	0	2	6	18.828	0	9	6	0	4	7	0	11
TRINITY_DN38263_c0_g2	1	2	28	7	13	2	8	0	4	9	35	16
TRINITY_DN13041_c0_g1	1	0	8	30.092	18.996	21.073	6.782	0	4	9.002	0	13.149
TRINITY_DN25503_c1_g1	7	0	0	0	4	0	20	0	4	10	0	0
TRINITY_DN80475_c0_g1	2.08	7.011	1.154	1.136	5.916	6.969	15.176	0	4.674	1.066	3.659	4.55
TRINITY_DN68673_c0_g1	0	0	7	0	6	6.992	0	0	4.927	0	12.964	3
TRINITY_DN80152_c0_g1	2	14.498	26.626	17.001	4.731	2	1	0	4.983	0	3.066	30.002
TRINITY_DN42140_c0_g1	9	0	4	1	2	10	3	0	4.999	23	0	8
TRINITY_DN61463_c0_g1	0	29	15	4	3	5	4	0	5	0	1	10
TRINITY_DN37075_c0_g1	0	0	1	6	4	3	2	0	5	0	2	7
TRINITY_DN7020_c0_g1	0	2	0	439	184	0	21	0	5	0	4	21
TRINITY_DN124171_c0_g1	0	0	0	20	37	0	14	0	5	0	4	37
TRINITY_DN31150_c0_g1	0	15	3	14.188	6.933	0	0	0	5	0	8.001	5
TRINITY_DN17330_c0_g1	5	8	0	4	23	9	6	0	5	0	13	16
TRINITY_DN42624_c0_g1	1	0	0	210	233	1	27	0	5	0	13	84
TRINITY_DN6162_c1_g2	19	0	6	0	2	3	4	0	5	0	103	0
TRINITY_DN11248_c0_g1	1	1	5	5	3	23	19	0	5	1	3	15
TRINITY_DN9198_c0_g1	24	58.007	4	0	9	13	2	0	5	2	0	9
TRINITY_DN26345_c0_g1	0	0	0	79	74	0	25	0	5	2	9	7
TRINITY_DN20740_c0_g1	1	55	1	216	118	1	8	0	5	3	11	46
TRINITY_DN19024_c0_g1	0	8	0	3	0	0	0	0	5	5	0	6.991
TRINITY_DN37901_c0_g1	3	18	10	8	22	22	8	0	5	5	9	5
TRINITY_DN14836_c0_g2	0	0	1	2	0	0	0	0	5	6	13	2
TRINITY_DN29682_c0_g1	0	2	27	14	3	5	23	0	5	7	11	3
TRINITY_DN2567_c0_g1	4	4	1	1	1	6	6	0	5	9	1	16
TRINITY_DN43783_c0_g1	0	13	3	3	19	6	42	0	5	14	4	4
TRINITY_DN19330_c0_g1	1	61	84	1	0	7	17	0	5	21	25	41.001
TRINITY_DN18690_c0_g1	2	45	25	4	4	7	5	0	5	27	15	16
TRINITY_DN61114_c0_g1	0	1	2	3	9	7	6	0	5	43.007	3	7
TRINITY_DN6464_c0_g1	6	0	1.764	1	3	3	10.465	0	5.44	2	1	25.977
TRINITY_DN11719_c0_g2	0	0	5	0	6	0	0	0	5.456	0	0	0
TRINITY_DN20405_c0_g1	0	6	0.834	0	0	0	15	0	6	0	0	3.003
TRINITY_DN33008_c0_g1	0	0	0	38	33	0	9	0	6	0	0	8
TRINITY_DN24199_c0_g3	0	0	0	0	9	0	0	0	6	0	2	0
TRINITY_DN63333_c0_g1	0	0	2	0	1	4	7	0	6	0	2	10
TRINITY_DN14256_c1_g1	1	5	0	2	7.999	3	0	0	6	0	3	11
TRINITY_DN12551_c1_g1	0	0	4	0	0	0	0	0	6	0	9	0
TRINITY_DN188537_c0_g1	1	0	0	254	284	0	37	0	6	0	14	66
TRINITY_DN33225_c0_g1	1	3	10	3	0	15	0	0	6	0	21	7
TRINITY_DN47110_c1_g1	0	0	5	2	0	0	0	0	6	0	22	3
TRINITY_DN11831_c0_g1	0	0	1	1193	405	10	38	0	6	0	26	112
TRINITY_DN12495_c0_g2	0	0	0	0	0	1	1	0	6	1	0	7
TRINITY_DN66689_c0_g1	6.954	13	13.084	0	0	22.001	5	0	6	4	14.995	5.049
TRINITY_DN39181_c0_g1	0	2	22	0	4	8	8	0	6	5	17	15
TRINITY_DN120299_c0_g1	2	7	2	0	15	7	1	0	6	6	1	0
TRINITY_DN147994_c0_g1	3	0	7	0	4	9	9	0	6	8	0	8
TRINITY_DN10479_c0_g2	1	2	2	13	5.138	37.17	32	0	6	12.651	33	5
TRINITY_DN50085_c0_g1	0	0	0	0	0	0	0	0	6	15	0	0
TRINITY_DN16289_c0_g1	0	0	11	0	0	0	0	0	6	146	17	0
TRINITY_DN23432_c0_g2	3	0	6	0	0	4	1	0	6.247	1	3	0
TRINITY_DN112145_c0_g1	0	0	2	2	0	0	10	0	7	0	0	1
TRINITY_DN13740_c0_g1	2	0	1	155	89	0	8	0	7	0	3	17
TRINITY_DN20944_c0_g1	0	0	1	0	0	4	4	0	7	0	4	6
TRINITY_DN146747_c0_g1	0	0	1	1	0	0	0	0	7	0	10	1
TRINITY_DN4915_c0_g1	0	0	0	408	485	0	25	0	7	0	17	46
TRINITY_DN52018_c0_g1	2	0	3	0	0	0	6	0	7	1	5	0
TRINITY_DN32447_c0_g1	1	6	7	21	0	3	9	0	7	2	8	0
TRINITY_DN43054_c0_g1	2.993	9.001	7	14.98	16.882	11	7	0	7	2.385	0	0
TRINITY_DN10756_c0_g3	6	0	0	0	0	0	16	0	7	5	0	0
TRINITY_DN75904_c0_g1	0.999	19	3	18	42	10	3	0	7	5.001	0.999	8
TRINITY_DN15347_c1_g1	0	2	1	0	1	7	2	0	7	7	6	1
TRINITY_DN28542_c0_g1	2	1	21	1	2	6	14	0	7	7	17	0
TRINITY_DN17545_c0_g5	1	12	1	1	4	1	0	0	7	8	5	12
TRINITY_DN21196_c0_g1	1	5	5	4	2	1	1	0	7	8	18	26
TRINITY_DN32670_c0_g1	0	0	0	16.081	0	37.015	2.946	0	7	8.001	0	0
TRINITY_DN16647_c0_g1	0	0	0	22	1	46	0	0	7	9	6	14
TRINITY_DN38237_c0_g1	0	0	0	1	0	0	0	0	7	9	45	13
TRINITY_DN76142_c0_g1	0	0	0	9	0	0	0	0	7	11	0	0
TRINITY_DN51572_c0_g1	0	0	0	0	6	0	0	0	7	12	0	0
TRINITY_DN25135_c0_g1	3	28	16.268	22.241	33.036	9	1	0	7	18	3	26
TRINITY_DN5161_c0_g1	0	14.001	22	10	48.001	8	11	0	7	20	13	3
TRINITY_DN38357_c0_g1	0	150	319.001	0	8	29	0	0	7	111	0	0
TRINITY_DN16484_c0_g1	0	0	0	20	0	0	9	0	7.001	14.809	11	1
TRINITY_DN7503_c0_g1	0	7	7.992	4	1	0	16	0	7.98	0	0	0
TRINITY_DN20429_c0_g1	0	11	18	0	13	0	0	0	8	0	0	0
TRINITY_DN157929_c0_g1	0	0	0	0	22	0	0	0	8	0	0	1
TRINITY_DN6171_c0_g1	26	9	94.994	5	11.998	3	140.003	0	8	0	0	13.001
TRINITY_DN52546_c1_g1	0	0	0	30	4	0	2	0	8	0	1	6
TRINITY_DN96024_c0_g1	0	0	0	0	0	0	15	0	8	0	2	0
TRINITY_DN37114_c0_g1	0	0	0	601	452	0	39	0	8	0	9	78
TRINITY_DN22670_c0_g1	0	0	0	0	0	0	0	0	8	0	11	25
TRINITY_DN38809_c0_g2	9	15	0	9	35.001	22	3	0	8	0	13	13
TRINITY_DN168441_c0_g1	0	0	0	645	448	2	31	0	8	0	18	65
TRINITY_DN31407_c0_g1	0	0	22.999	0	0	1	0	0	8	0	20.999	0
TRINITY_DN8594_c0_g1	0	19	0	0	10	0	14	0	8	0	39	0
TRINITY_DN84373_c0_g1	0	17	5	3	1	17.001	14	0	8	1	2	1
TRINITY_DN2180_c1_g1	0	0	0	324	172	1	13	0	8	2	10	64.999
TRINITY_DN43774_c0_g1	0	8	5	0	0	0	6	0	8	3	1	13
TRINITY_DN24239_c0_g3	1	0	0	0	0	0	0	0	8	6	0	0
TRINITY_DN12318_c0_g1	0	33	16	435	354	1	43	0	8	6	16	65
TRINITY_DN14400_c0_g1	0	0	1	5	33	41	5	0	8	8	15	4
TRINITY_DN17838_c0_g1	0	1	17	2	0	6	18	0	8	10	1	2
TRINITY_DN64562_c0_g2	7	3	0	0	0	8	3	0	8	10	6	0
TRINITY_DN36474_c0_g1	1	0	6	0	0	0	1	0	8	20	5	4
TRINITY_DN95876_c0_g1	0	0	0	0	2.987	0	0	0	8.986	0	1	14
TRINITY_DN15826_c1_g1	0	0	0	1	4.321	0	9	0	9	0	0	0
TRINITY_DN31774_c0_g1	0	0	0	0	0	9	0	0	9	0	0	0
TRINITY_DN19339_c0_g1	0	2	3	3	1	10	6	0	9	0	3	15
TRINITY_DN3370_c0_g1	0.5	0	0	445.27	225.39	0	0	0	9	0	12	0
TRINITY_DN11567_c0_g1	0	2	0	456	426	0	28	0	9	0	26	73
TRINITY_DN71_c0_g2	0	0	3	1086	650	2	37	0	9	0	34	116
TRINITY_DN104477_c0_g1	0	0	0	0	0	0	1	0	9	1	23	1
TRINITY_DN63244_c1_g1	0	0	0	63.999	45.999	0	11	0	9	2	1	6
TRINITY_DN28705_c0_g1	0	5	1	9	5	17	14	0	9	6	0	19
TRINITY_DN512_c1_g1	0	0	3	16.302	21.999	12	17.822	0	9	6	6	9
TRINITY_DN19622_c0_g1	0	0	0	0	0	0	0	0	9	11	31	3
TRINITY_DN49922_c0_g1	6	0	0	1	1	0	12.001	0	9	17	0	0
TRINITY_DN12449_c0_g1	24.999	48	118	3	14.999	29	199.501	0	9	24	567	0
TRINITY_DN33340_c0_g1	6	0	0	0	0	1	0	0	9	47.999	0	1
TRINITY_DN25234_c0_g1	0	11	0	6.33	1.923	0	8.329	0	9.001	4	12.328	0
TRINITY_DN58842_c0_g1	0	0	0	0	0	7	0	0	10	0	0	0
TRINITY_DN86798_c0_g1	2	0	57	0	0	0	0	0	10	0	0	0
TRINITY_DN3644_c0_g1	0	0	0	1613	758	0	50	0	10	0	47	133
TRINITY_DN16274_c0_g1	3	16	2	24	37	0	3.963	0	10	2	2	5
TRINITY_DN128221_c0_g1	2	3	0	0	2	7	41	0	10	3	0	4
TRINITY_DN45587_c0_g1	8	0	6	0	1	5	0	0	10	18	0	2
TRINITY_DN53490_c0_g1	2.999	7	0	5	7	2	15.018	0	11	0	15	8
TRINITY_DN57657_c0_g1	0	0	0	0	0	0	0	0	11	0	17	5
TRINITY_DN231503_c0_g1	0	0	11	0	0	0	0	0	11	0	18	4
TRINITY_DN38989_c0_g1	0	0	17	42	15	9	9	0	11	0	31	0
TRINITY_DN3253_c0_g1	0	0	2	1309	574	0	41	0	11	4	19.001	79.999
TRINITY_DN3395_c0_g1	2	17	6	1762	957	0	88	0	11	5	38	146
TRINITY_DN12955_c0_g1	3	17.001	4	20	8	5	8	0	11	12	57	7
TRINITY_DN3601_c1_g2	8	9	36	0	25	73	0	0	11	22	0	25
TRINITY_DN12463_c0_g1	0	0	0	996	364	122	31	0	12	0	20	88
TRINITY_DN10471_c0_g1	0	2	5	1142	595.001	2	47.001	0	12	0	33	117
TRINITY_DN4635_c0_g2	0	11	0	0	5	0	28	0	12	1	12	0
TRINITY_DN27006_c0_g1	11	2	16	0	2	1	2	0	12	10	4	2
TRINITY_DN27831_c0_g1	0	0	1	139.382	0	258	0	0	12	10.033	4.003	30.734
TRINITY_DN12782_c0_g1	0	0	11	0	99	11	71	0	12	11	26	8
TRINITY_DN43194_c0_g1	6	2	4	0	0	6	5	0	12	11	39	0
TRINITY_DN8722_c0_g1	1	17	56	31.068	62	3.999	13	0	12	41.999	39.999	13
TRINITY_DN8111_c0_g1	2	87	0	0	0	3	4	0	12.008	11	7.854	68
TRINITY_DN17283_c0_g1	0	26.478	0	11	0	0	0	0	12.046	0	0	0
TRINITY_DN67986_c0_g1	0	14	0	0	0	0	0	0	13	0	0	0
TRINITY_DN121288_c0_g1	8	0	0	0	2.992	0	0	0	13	0	1	3
TRINITY_DN6260_c0_g1	0	0	1	737	375	1	37	0	13	0	26	83
TRINITY_DN128701_c0_g1	0	5	38	38	0	62	67	0	13	0	70	0
TRINITY_DN20135_c0_g1	0	2.997	26	0	0	0	1	0	13	1	3	0
TRINITY_DN17061_c0_g1	1	0	1	652	283	0	34	0	13	1	10	66
TRINITY_DN27910_c0_g1	3	0	6	0	2	8	22	0	13	2	8	0
TRINITY_DN59218_c0_g1	0	1	15	0	2	0	0	0	13	8	8	12
TRINITY_DN30336_c0_g1	0	1	80	3.001	0	12	24	0	13	11	0	0
TRINITY_DN109416_c0_g1	6	10.001	0	16	10	17	24.001	0	13	13	20	0
TRINITY_DN49289_c0_g2	3	3	8.033	0	3	4	12.17	0	13.174	1	5	0
TRINITY_DN49113_c0_g2	0	0	4	5	13	0	14	0	14	0	16	16
TRINITY_DN11685_c0_g1	0	19	22	0	40	3	0	0	14	1	2	6
TRINITY_DN65047_c0_g1	0	0	0	34	0	0	0	0	14	3	0	0
TRINITY_DN61858_c0_g1	17	0	0	0	1	5	0	0	14	4	2	0
TRINITY_DN35822_c0_g1	0	1	4	1	6	0	0	0	14	4	9	0
TRINITY_DN29475_c0_g1	60.96	38	6	0	2	11	7	0	14	5	2	21
TRINITY_DN48523_c0_g2	1	1	0	0	4	6	60	0	14	7	0	3
TRINITY_DN15782_c0_g1	32	108	24	2	12	30	16	0	14	7	1	11
TRINITY_DN21315_c0_g1	3	27	1	0	3	308	0	0	14	18	0	0
TRINITY_DN32546_c0_g1	15	0	0	0	0	2	5	0	14	25	42	11
TRINITY_DN20073_c0_g1	0	0	0	24	0	0	47	0	15	0	0	22
TRINITY_DN71_c0_g1	0	0	0	571	316	0	18	0	15	0	13	76
TRINITY_DN89159_c0_g1	6	25	37	6	37	8	13	0	15	66	34	6
TRINITY_DN12679_c0_g1	0	0	0	6	0	159	0	0	16	0	0	0
TRINITY_DN38989_c0_g2	0	0	40.999	0	7	0	0	0	16	0	0	0
TRINITY_DN81109_c0_g1	1	0	0	1	0	0	6	0	16	0	8	0
TRINITY_DN23287_c0_g1	0	0	0	0	0	0	0	0	16	0	14.999	0
TRINITY_DN70830_c0_g1	0	0	0	11	0	16	0	0	16	0	33	0
TRINITY_DN24949_c0_g1	0	0	2	1263	769	0	58	0	16	1	22	146
TRINITY_DN38547_c0_g2	3	1	0	0	1	1	0	0	16	6.298	0	0
TRINITY_DN26870_c0_g1	0	9	0	0	2	11	2	0	16	9	0	19
TRINITY_DN38047_c0_g1	0	0	28	0	8	69.001	0	0	16	107.001	8	0
TRINITY_DN14762_c0_g1	0	0	0	0	0	0	21	0	17	0	0	0
TRINITY_DN25503_c0_g1	0	8	25	4	1	9	27	0	17	0	10	22
TRINITY_DN3064_c0_g1	1	0	1	946	721	0	40	0	17	0	24	89
TRINITY_DN69423_c0_g1	0	0	14	0	0	0	2	0	17	2	5	5
TRINITY_DN94839_c0_g1	13	0	1	0	1	10	0	0	17	3	1	0
TRINITY_DN12842_c1_g2	3	9	0	0	0	0	1	0	17	11	54	0
TRINITY_DN35842_c0_g1	3	0	0	0	2	0	24	0	17	21	0	0
TRINITY_DN48388_c0_g1	0	10	0	0	7	0	0	0	18	0	0	0
TRINITY_DN151662_c0_g2	2	0	29	0	0	0	6	0	18	0	1	9
TRINITY_DN77279_c0_g1	0	0	14	0	0	0	23	0	18	0	12	3
TRINITY_DN6911_c0_g1	0	0	0	1500	1148	0	130	0	18	0	35	222
TRINITY_DN156114_c0_g1	0	0	15	0	16.999	10	0	0	18	4	0	0
TRINITY_DN17473_c0_g1	21.086	0	0	0	0	6	0	0	18.005	19	5	0.779
TRINITY_DN143157_c0_g1	0	0	80	0	0	0	0	0	19	0	0	0
TRINITY_DN15603_c0_g1	0	0	214	0	0	0	0	0	19	0	0	0
TRINITY_DN18115_c0_g1	19	0	156	0	1	0	0	0	19.999	68.001	72	0
TRINITY_DN16589_c6_g1	0	0	8	0	5	2	0	0	20	0	0	0
TRINITY_DN66690_c0_g1	1	57	4	1	6	0	0	0	20	0	7	0
TRINITY_DN4832_c0_g1	2	0	1	892	440	0	29	0	20	0	23	83
TRINITY_DN103980_c0_g1	22	0	1	0	3	2	28	0	20	0	95	25
TRINITY_DN80016_c0_g2	1	3	18	0	0	13	13	0	20	0	160	13
TRINITY_DN8197_c0_g1	0	2	1	247.919	70.369	1	0	0	20	2	44	31.777
TRINITY_DN12842_c1_g1	0	24.999	0	0	3	203	0	0	20	31	0	5
TRINITY_DN22325_c0_g1	23	13	0	4	9	67	60	0	20	31	40	13.001
TRINITY_DN85891_c0_g1	16	0	0	11	13	0	0	0	20	41	0	0
TRINITY_DN28192_c0_g1	0	0	0	0	0	23.867	9	0	21	0	0	0
TRINITY_DN3527_c3_g1	0	42	6	7	7	1	1	0	21	2	9	1
TRINITY_DN12191_c0_g2	5	3	38	1	0	38	10	0	21	35	102	22
TRINITY_DN18979_c0_g1	0	0	60	6	0	0	0	0	22	0	0	14
TRINITY_DN9752_c0_g1	0	0	6	1706	902	0	51	0	22	2	34	141
TRINITY_DN30415_c0_g1	0	18	16	0	3	1	0	0	22	14	13	23
TRINITY_DN5879_c0_g1	3	2	10	0	120.001	21	21	0	22	19	1	105.001
TRINITY_DN22417_c0_g1	0	7	13.001	3	1	7	3	0	22	19	45.999	6
TRINITY_DN17241_c0_g1	1	11	6	2	14	21	14	0	23	0	0	4
TRINITY_DN32128_c1_g1	0	0	0	39	18	0	4	0	23	16	0	0
TRINITY_DN23090_c0_g1	2	11	35	0	17	39	0	0	23	19	0	7.001
TRINITY_DN10959_c0_g1	1	45.001	18	6	0	0	91	0	23	33	78	0
TRINITY_DN42745_c0_g1	0	0	0	0	6	0	0	0	24	0	0	2
TRINITY_DN29655_c0_g1	0	1	15	0	0	40	37	0	24	28.001	68	4.999
TRINITY_DN5796_c0_g1	1	9	8	39.999	13	34	30.999	0	25	26	536.999	6
TRINITY_DN30131_c0_g1	0	2	0	10	4	6	0	0	26	0	9	4
TRINITY_DN6048_c0_g1	0	3	6	0	8	0	18	0	27	9	9	29
TRINITY_DN6679_c0_g1	0	0	29	0	180	27.001	156.999	0	27	9	81	10
TRINITY_DN10351_c0_g1	69	51.001	145	0	33	89	29	0	28	20	27	4
TRINITY_DN19290_c0_g1	0	0	0	0	1	0	0	0	28	55	84	2
TRINITY_DN126184_c1_g1	0	1	8	1	3	3	4	0	29	0	9	4
TRINITY_DN17363_c0_g1	0	5	23	1	0	0	10	0	29	33	28	1
TRINITY_DN8569_c1_g1	1	30	32	3	0	0	63.998	0	29.999	0	27	0
TRINITY_DN62371_c0_g1	0	0	17	16	30	0	28	0	30	0	30	23
TRINITY_DN24856_c0_g1	1	0	0	0	0	0	0	0	30	6	0	0
TRINITY_DN19258_c0_g1	2	319	146.001	1	4	37	8	0	30	25	41	80.999
TRINITY_DN11632_c0_g2	0	0	0	0	0	0	0	0	30.999	0	59	0
TRINITY_DN16511_c0_g1	2	20	37	0	0	0	11	0	31	23	75.001	15
TRINITY_DN75135_c0_g1	7	0	0	3	0	0	0	0	32	0	0	0
TRINITY_DN12222_c0_g1	15	81	23	20	4	28.001	5	0	32.131	16	3	34
TRINITY_DN39781_c0_g1	0	32	0	0	0	0	0	0	33	0	0	16
TRINITY_DN16135_c0_g1	1	20	3	5	27	1	72	0	33	16	1	0
TRINITY_DN29798_c1_g1	0	5	0	0	0	0	2	0	34	0	21	1
TRINITY_DN7398_c0_g1	0	0	1	1663	360	0	130	0	34	0	41	174
TRINITY_DN15665_c1_g1	1	0	3	0	0	0	0	0	34	15	0	2
TRINITY_DN509_c0_g1	0	0	1	2737.44	1846.01	0	185.983	0	35	0	95	383.999
TRINITY_DN20995_c0_g1	12	0	0	0	0	0	0	0	35	38	0	13
TRINITY_DN38437_c0_g1	1.725	1	0	0	0	0	0	0	36	0	1	7
TRINITY_DN12343_c0_g1	0.999	0	99	147.999	4.999	103	116.999	0	36.001	95	0	60.001
TRINITY_DN34073_c0_g1	0	0	34	24	0	38	22	0	36.999	29	0	16
TRINITY_DN11263_c0_g3	0	59	57.999	3	0	0	14.999	0	38	0	16.001	0
TRINITY_DN592_c0_g1	0	0	2	3246	1877	0	159	0	38	1	112.999	443.001
TRINITY_DN27074_c0_g1	7	0	24.001	0	0	1	0	0	39	0	55	0
TRINITY_DN24492_c0_g2	4	13	4	2	0	6	9	0	39.211	16.001	0	8
TRINITY_DN49444_c2_g1	0	0	0	0	8	0	0	0	42	2	0	3
TRINITY_DN4830_c0_g1	0	0	0	3014	1474	0	159	0	42.001	0	66	308
TRINITY_DN22080_c0_g1	0	0	0	0	0	18	0	0	42.999	0	33	0
TRINITY_DN17696_c0_g2	0	0	0	0	0	42	30	0	44	20	62	0
TRINITY_DN16867_c0_g1	0	0	0	91.99	0	0	0	0	46	0	48.059	0
TRINITY_DN329_c1_g1	21.835	0	79.864	60.311	0	0	34.925	0	46.027	16.236	118.944	23.933
TRINITY_DN8655_c0_g3	2	57	33	7	0	0	140	0	47	0	46	0
TRINITY_DN49073_c0_g1	0	14	0	1	0	0	14	0	48	0	0	0
TRINITY_DN12461_c0_g2	0	0	0	0	45	0	144.001	0	50	40	0	59
TRINITY_DN236_c0_g1	0	5	0	35	17	8	0	0	51	0	42	0
TRINITY_DN2466_c4_g1	4	17	35.247	60.125	31.97	0	86	0	51	49	13	17
TRINITY_DN93307_c0_g1	0	0	0	0	0	0	0	0	52	0	95	67
TRINITY_DN87398_c0_g1	0	29	0	0	0	1	0	0	56	1	0	14
TRINITY_DN12960_c0_g2	14	48	34	28	7	42	87.001	0	56	59	14	6
TRINITY_DN8594_c2_g1	0	16	15	0	0	60	27	0	57	49	4	12
TRINITY_DN6682_c0_g1	178.999	1	0	64	0	462.047	209.999	0	57	229.999	662	1
TRINITY_DN15267_c0_g1	0	0	0	43	58	19	88.001	0	58	0	0	48
TRINITY_DN29798_c0_g1	0	0	0	0	0	0	2	0	60	0	45	23
TRINITY_DN7162_c0_g1	0	8	0	0	5	0	0	0	60.001	34	94	16
TRINITY_DN10960_c0_g1	0	0	48	19	56.001	0	78	0	61	0	57.001	48
TRINITY_DN64222_c0_g2	0	0	15	1	2	10	0	0	61	13	0	1
TRINITY_DN41351_c0_g1	0	0	0	0	0	0	1	0	61.001	1	66	27
TRINITY_DN24440_c0_g1	0	0	44	0	0	4	0	0	63	0	0	0
TRINITY_DN15961_c0_g1	7	24.986	16	2	0	17.985	35	0	63	46.986	21.498	12
TRINITY_DN14623_c0_g1	23	67	144.001	0	0	0	121	0	65	0	226	0
TRINITY_DN5101_c0_g2	14	5	54	0	27	103	0	0	65	55	0	62.999
TRINITY_DN8711_c0_g1	0	0	0	0	22	22	41	0	67	0	0	0
TRINITY_DN41351_c0_g2	0	0	0	0	0	5	10	0	67	132	107	34.001
TRINITY_DN14791_c0_g1	39	0	126	16	0	55	43	0	70.001	0	863	1
TRINITY_DN12121_c0_g2	0	71	18	58	0	0	98	0	76	0	21	40
TRINITY_DN15603_c0_g2	0	0	0	0	0	0	86	0	76	0	469.999	0
TRINITY_DN34153_c0_g1	0	0	0	0	0	0	0	0	76	70	0	0
TRINITY_DN13851_c0_g1	19	12	134	0	0	297.001	14	0	81	196	272.001	187
TRINITY_DN22339_c0_g1	0	0	0	0	5	6	1	0	88	0	0	0
TRINITY_DN6833_c0_g1	75	51.999	0	36	37.001	239	243	0	90.994	146	145	62
TRINITY_DN19928_c0_g1	46.001	0	0	5	0	0	0	0	92	0	233.001	135
TRINITY_DN1234_c2_g2	0	0	0	0	0	22	0	0	95	0	0	23
TRINITY_DN7135_c0_g1	0	0	112	0	0	0	83	0	96	0	0	0
TRINITY_DN100754_c0_g1	0	57	0	0	0	0	0	0	105	0	0	0
TRINITY_DN14214_c0_g1	1	3	10	1	2	0	32	0	109.998	1	67	8
TRINITY_DN19847_c0_g1	0	0	0	0	0	0	0	0	116	93	0	0
TRINITY_DN8381_c0_g1	0	0	0	146	92.999	0	0	0	123	55	350	91.999
TRINITY_DN13478_c0_g1	2	42	53	13	13	24	0	0	141	43	54.001	46
TRINITY_DN26184_c0_g1	0	0	0	1	0	0	118.999	0	154	0	0	0
TRINITY_DN9939_c0_g1	0	0	0	0	0	0	95	0	169.999	0	35	97.999
TRINITY_DN23520_c0_g1	0	0	0	0	0	71	0	0	196	0	0	81.999
TRINITY_DN12200_c0_g1	0	22	0	0	0	0	33	0	197	0	0	0
TRINITY_DN8281_c1_g1	12	0	76	5	12	143	0	0	200	187	18	1
TRINITY_DN6339_c1_g1	1	30.001	94	17	89	196	231	0	210	0	504	37
TRINITY_DN8790_c0_g1	173.999	33	614.999	1	6	0	67	0	216	140	406	125
TRINITY_DN42484_c0_g1	1	26	16	25	6	3	5.764	0	219	2	11	2
TRINITY_DN64888_c0_g1	0	0	0	0	0	0	141	0	229	0	51	121
TRINITY_DN792_c1_g3	0	0	0	0	0	0	177	0	321	8	0	137
TRINITY_DN37617_c0_g1	0	67	189	0	1	0	0	0	426	0	0	0
TRINITY_DN2220_c1_g1	0	0	0	0	0	0	582.999	0	638	0	1277	2
TRINITY_DN9292_c0_g1	0	408	205.001	4	82	101	0	0	2080.78	396	0	128
TRINITY_DN75200_c0_g1	0	0	0	12	0	9	24.999	0.896	10.837	0	2	0
TRINITY_DN118500_c0_g1	0	0	9	3	11	2	3	0.925	0	0	11.001	0
TRINITY_DN93527_c0_g1	0	7.43	0	10.885	11.363	4.295	0	0.993	15	4.511	22.513	6.409
TRINITY_DN17929_c0_g1	0	1	2	1	10	0	2	0.999	1	0	10.485	9.191
TRINITY_DN112616_c0_g1	0	0	0	7	5	3	39	1	0	0	0	0
TRINITY_DN97675_c0_g1	0	0	0	0	5	7	13	1	0	0	0	0
TRINITY_DN102957_c0_g1	0	0	0	1	6	15	13	1	0	0	0	2
TRINITY_DN56285_c0_g1	2	0	0	2	3	144	2	1	0	0	0	20
TRINITY_DN20649_c0_g1	2	69.999	10.001	5	8	90	197.001	1	0	0	1	0
TRINITY_DN81030_c1_g1	0	0	0	8	5.006	0	0	1	0	0	2	0
TRINITY_DN35305_c0_g1	0	8	16	0	1	0	0	1	0	0	4	8
TRINITY_DN98148_c0_g1	0	2	7	4	0	3	8	1	0	0	5	3
TRINITY_DN65321_c0_g1	4	1	0	1	0	7	0	1	0	0	9	2
TRINITY_DN16426_c0_g1	0	4	6	0	0	0	0	1	0	0	12	2
TRINITY_DN37354_c0_g2	0	0	2	0	0	0	12	1	0	0	27	0
TRINITY_DN9822_c1_g7	0	0	0	50.156	13.253	16.117	28.16	1	0	0	41.629	0
TRINITY_DN27894_c0_g1	0	37	83	0	0	0	47	1	0	0	54	0
TRINITY_DN9727_c0_g1	0	0	0	0	7	0	6	1	0	0	327	131
TRINITY_DN47802_c0_g1	0	1	56	14	1	0	0	1	0	1	0	0
TRINITY_DN12640_c0_g1	0	0	0	7	3	6	4	1	0	1	2	0
TRINITY_DN10499_c0_g1	0	0	6	0	0	0	19.999	1	0	1	11	13
TRINITY_DN4655_c0_g1	2	1	8	2	14	41	47	1	0	2	0	0
TRINITY_DN15922_c0_g3	0	1	6	2	0	2	2	1	0	2	6	0
TRINITY_DN31376_c0_g1	2	24	24	0	3	1	3.002	1	0	2	17.998	9
TRINITY_DN68736_c0_g1	0	42	14	1	2	3	4	1	0	3	4	6
TRINITY_DN130204_c0_g1	0	0	0	2	0	0	0	1	0	3	12	7
TRINITY_DN66434_c0_g1	1	1	0	5	21	15	1	1	0	4	0	2
TRINITY_DN36132_c1_g2	0	0	0	6	6	2	2	1	0	4	1	1
TRINITY_DN51464_c1_g1	0	0	1	0	0	0	123	1	0	4	295	1
TRINITY_DN20402_c0_g1	1	10	6	2	19	10	51	1	0	6	2	0
TRINITY_DN19913_c0_g1	6	2	32	6	0	1	1	1	0	9	29	11
TRINITY_DN16641_c0_g1	0	7	12	3	6	2	4	1	0	10.413	6	4
TRINITY_DN36859_c0_g1	0	0	2	0	0	0	5	1	0	14	0	13
TRINITY_DN68709_c0_g1	0	0	15	0	5	21.328	10	1	0	17	0	5.982
TRINITY_DN153604_c0_g1	0	39	23	21	2	0	17	1	0	30	2	12
TRINITY_DN20235_c0_g2	12	31	1	16	16	36	46	1	0	40	3	0
TRINITY_DN15496_c0_g1	0	211.998	192	3	5	1	7	1	0	84	50.999	131.999
TRINITY_DN12226_c3_g1	0	6	135	0	3	24	45	1	0	92	83	0
TRINITY_DN14616_c0_g2	0	17	0	0	4	1	0	1	0	124	73.999	19
TRINITY_DN107087_c0_g1	0	0	3	6	8	0	10	1	1	0	0	1
TRINITY_DN23495_c0_g1	0	7.999	7	7	0	10	1	1	1	0	4	0
TRINITY_DN27122_c0_g1	1	33	0	147	3	1	0	1	1	0	4	2
TRINITY_DN138841_c0_g1	0	0	1	0	1	16	9	1	1	0	4	3
TRINITY_DN60627_c0_g1	0	3	1	0	0	0	7	1	1	0	6	2
TRINITY_DN76708_c0_g1	3	10	8	0	0	0	1	1	1	0	12	1
TRINITY_DN15854_c0_g1	0	0	19	0	0	1	0	1	1	0	12	2
TRINITY_DN29909_c0_g1	42	0	0	0	1	0	2	1	1	0	1511	0
TRINITY_DN12234_c0_g1	34	251	5	50	12	13	11	1	1	1	0	7
TRINITY_DN47342_c0_g1	0	1	5	4	0	10	1	1	1	1	5	7
TRINITY_DN14631_c0_g1	0	3	0	6	9	1	1	1	1	2	15	0
TRINITY_DN47559_c0_g1	0	3	0	1	1	22	9	1	1	3	0	3
TRINITY_DN59983_c0_g1	0	0	0	3	6	6	5	1	1	3	5	3
TRINITY_DN25670_c0_g1	2	78.001	4	3	10.22	1	2.228	1	1	6	0	5
TRINITY_DN19337_c0_g2	6	0	25	2	1	5	5	1	1	7	2	1
TRINITY_DN41745_c0_g1	1	0	12	1	7	4	7	1	1	8	8	1
TRINITY_DN88796_c0_g1	1	1	1	2	11	6	4	1	1	10	2	3
TRINITY_DN26948_c1_g1	0	0	0	0	2	0	0	1	1	18	20	0
TRINITY_DN26713_c0_g2	1	7	1	31	8	21	14	1	1	39	82	20
TRINITY_DN27118_c0_g1	0	163.001	186	3	5	1	6	1	1	50	44.999	39
TRINITY_DN32400_c0_g1	1	7	24	7	81	54.999	4	1	1	87	5	76
TRINITY_DN49626_c0_g1	1	0	0	6.616	0	8	1	1	1.001	4	2.996	1.341
TRINITY_DN5091_c0_g1	3	5.605	3	13.45	16.203	38.856	37.343	1	1.257	1	1	11.858
TRINITY_DN64848_c0_g1	3	11	3	15	0	6.951	0	1	1.978	0	11.245	1
TRINITY_DN5567_c1_g2	1	7	1	0	1	2	10	1	2	0	0	6
TRINITY_DN52545_c0_g1	0	1	0	1	7.968	3	1	1	2	0	2	6
TRINITY_DN37370_c0_g1	4	1	1	0	8	3	4	1	2	0	2	7
TRINITY_DN35283_c0_g2	0	1	0	83	41	1	10	1	2	0	3	11
TRINITY_DN24351_c1_g2	1	0	29	5	0	3	17	1	2	0	4	2
TRINITY_DN43729_c0_g1	0	1	0	49	29	0	3	1	2	0	4	6
TRINITY_DN2888_c0_g3	40	305	65	10	212	285	43	1	2	1	0	2
TRINITY_DN143433_c0_g1	0	1	12	54	20	1	12	1	2	1	5	18
TRINITY_DN47030_c0_g1	0	1	1	30.001	24	1	5	1	2	3	0	2
TRINITY_DN22815_c0_g1	1	16	27	2	0	3	9	1	2	3	0	18
TRINITY_DN10351_c1_g1	0	1	2	0	2	1	6	1	2	5	2	7
TRINITY_DN47853_c0_g1	4	15	13	1	1	3	5	1	2	5	2	8
TRINITY_DN100728_c0_g1	5	6	4	2	2	2	3	1	2	6	0	6
TRINITY_DN12222_c1_g2	3	14	3	5	18	33	15	1	2	6	3	8
TRINITY_DN50346_c0_g2	0	2	1	10	5	3	2	1	2	8	2	1
TRINITY_DN127882_c0_g1	7	2	6	1	1	2	3	1	2	9	5	0
TRINITY_DN73632_c0_g3	0	12	6	0	0	1	0	1	2	12	5	7
TRINITY_DN34254_c0_g1	1	72	103	8	54	10	10	1	2	14	40	26
TRINITY_DN56176_c0_g1	0	188	95	0	3	3	11	1	2	43	20	50
TRINITY_DN31454_c0_g3	1	3	1	6	0	0	1	1	3	0	6	5
TRINITY_DN7209_c0_g1	1	6	2	7	2	10	5	1	3	0	7	12
TRINITY_DN78192_c1_g1	4	2	0	0	3	0	13.001	1	3	0.995	0	9.573
TRINITY_DN24588_c0_g1	1	6	0	1	6	6	14	1	3	1	0	11
TRINITY_DN17761_c0_g1	0	0	5	7	0	0	0	1	3	1	3	6
TRINITY_DN12314_c0_g1	0	0	0	102	112	2	28	1	3	1	15	23
TRINITY_DN35460_c0_g1	5	1	6	3	8	4	4	1	3	2	2	5
TRINITY_DN3459_c0_g2	0	1	3	1	1	4	6	1	3	2	2	7
TRINITY_DN28244_c0_g1	0	0	1	0	6	0	1	1	3	2.98	3	7
TRINITY_DN96413_c0_g1	0	0	0	1	0	4	43	1	3	3	0	19
TRINITY_DN129857_c0_g1	0	0	3	3	4	9	11	1	3	3	2	5
TRINITY_DN19824_c0_g1	3.017	16.001	8	7	12.842	0	2	1	3	4	0	4
TRINITY_DN20227_c1_g1	0	0	1	55.999	41	2	6	1	3	4	3	8
TRINITY_DN76081_c0_g1	2	54	5	1	1	5	3	1	3	4	19	0
TRINITY_DN31592_c0_g1	10.983	2.001	2	8	54.013	3	4	1	3	4.002	4	1
TRINITY_DN27349_c0_g1	1	0	1	6	1	2	1	1	3	6	0	1
TRINITY_DN64158_c0_g1	7	1	2	4	6	3	7	1	3	6	2	6
TRINITY_DN11420_c1_g1	0	10	0	3	0	0	4	1	3	6	7	34
TRINITY_DN22587_c0_g2	1	2	29	21	17	46	25	1	3	6	15	2
TRINITY_DN26204_c0_g1	4	3	9	0	31	2	8	1	3	9.888	11	0
TRINITY_DN15401_c1_g1	2	1	6	0	0	0	9	1	3	11	57	8
TRINITY_DN15703_c0_g1	1	1	9	1	5	4	22	1	3	13	9	1
TRINITY_DN41710_c0_g1	1	141.001	142	0	0	0	6	1	3	49	60	54
TRINITY_DN35932_c0_g2	0	1	0	4	32	2	4	1	3	94	1	2
TRINITY_DN25378_c0_g1	0	0	0	97	144	0	17	1	4	0	1	39
TRINITY_DN31429_c0_g1	0	0	12	6	0	4	13	1	4	1	2	5
TRINITY_DN86958_c0_g1	0	13	1	3	9	2	4	1	4	1	5	6
TRINITY_DN15828_c0_g1	0	0	0	234	341	4	11	1	4	2	8	35
TRINITY_DN18633_c0_g1	1	8	1	569	698	11	48	1	4	3	15	69
TRINITY_DN9072_c0_g1	1	4	11	1	5	18	1	1	4	5	4	1
TRINITY_DN39757_c0_g1	5	1	3	7	8	0	10	1	4	5	14	5
TRINITY_DN95078_c0_g1	0	4	2	0	2	4	0	1	4	6	9	9
TRINITY_DN23434_c0_g1	2	0	2	0	5	4	3	1	4	6	18	0
TRINITY_DN9524_c0_g1	1	9	12	4	6.208	6	9	1	4	7	5	5
TRINITY_DN74556_c0_g1	0	42	37	27	6	4	5	1	4	12	26	15
TRINITY_DN111489_c0_g1	2	4.999	9	3	5.002	18	14.001	1	4	20	30	13
TRINITY_DN10083_c0_g2	0	2	5	10	3	83	3	1	5	0	1	5
TRINITY_DN6913_c0_g1	8	17	51	10	19	6	18	1	5	0	9	22
TRINITY_DN63074_c0_g1	1	1	0	7	4	30	6	1	5	1	0	6
TRINITY_DN37910_c0_g2	0	1	0	9	4	5	0	1	5	2	2	7
TRINITY_DN17559_c0_g1	0	5	6	1	1	3	2	1	5	2	2	13
TRINITY_DN22758_c0_g1	6	0	6	1	1	9	0	1	5	4	12.003	0
TRINITY_DN24539_c0_g1	2	0	2	0	1	7	4	1	5	7	4	1
TRINITY_DN36161_c0_g1	0	56	132	1	8	10	2	1	5	9	20	19
TRINITY_DN12514_c1_g1	2	4.646	7.45	17	3.006	4.873	5.83	1	5.007	11	2	1
TRINITY_DN103102_c0_g1	2	0	0	19	35	5	4	1	6	0	2	9
TRINITY_DN69740_c0_g1	0	0	0	11	5	28	1	1	6	0	4	2
TRINITY_DN25427_c0_g1	2	0	14	0	0	0	4	1	6	0	7	0
TRINITY_DN41566_c0_g1	1	11	21	2	0	3	2	1	6	2	16	5
TRINITY_DN65594_c0_g1	0	0	0	1.479	2	5.434	3	1	6	5	3	1
TRINITY_DN26692_c0_g1	2	2	9	36	3	17	0	1	6	15	0	0
TRINITY_DN49017_c0_g1	0	3	3	13	5	3	5.182	1	6.609	0	0	0
TRINITY_DN49358_c0_g1	1	0	5	2	1	1	7	1	7	0	2	0
TRINITY_DN31291_c0_g1	0	0	0	49	115	0	9	1	7	1	4	11
TRINITY_DN14391_c0_g1	5	2	23	54	11	2	12	1	7	2	21	1
TRINITY_DN13845_c0_g3	0	2	0	23	4	10	4	1	7	3	12	5
TRINITY_DN73084_c0_g1	2	0	2	1	0	61	6	1	7	4	2	3
TRINITY_DN13955_c0_g1	1	15	18.325	15	21	6	8	1	7	8	11	8
TRINITY_DN14492_c0_g2	0	35	15	9	2	12	3	1	7	17	2	22
TRINITY_DN19365_c0_g1	1	0	1	23	20	1	30	1	7	23	13.999	13.999
TRINITY_DN27336_c0_g2	0	12	0	622	163.999	17	76	1	7	29	22	116.999
TRINITY_DN119650_c0_g1	3	11	17	1	4	0	4	1	7	30	14	20
TRINITY_DN18108_c0_g1	9	14	0	4	0	2	3	1	7	32	0	66
TRINITY_DN189031_c0_g1	1	345	245	5	2	5	14	1	7	95	57	72
TRINITY_DN137573_c0_g1	0	9.781	0	1	7.973	9.072	7.001	1	7.174	31.087	2	5.112
TRINITY_DN62626_c0_g1	1	0	0	0	0	0	0	1	8	0	7	10
TRINITY_DN21271_c0_g1	0	0	0	16	14	5	12	1	8	2	8	7
TRINITY_DN22638_c0_g1	0	3	1	2	3	7	4	1	8	3	2	3
TRINITY_DN11662_c0_g4	2	18	1	2	2	13	9	1	8	5	10	3
TRINITY_DN23710_c0_g1	0	0	14	9	4	0	0	1	8	6	5	0
TRINITY_DN40667_c1_g1	0	2	10	1	3	0	2	1	8	6	9	11
TRINITY_DN145338_c0_g1	1	1	9	4	1	0	4	1	8	8	2.003	0
TRINITY_DN40458_c0_g1	0	7	3	7	7	1	7	1	8	9	19	6
TRINITY_DN2169_c2_g1	4	1	5	4	10	7	31	1	8	10	6	17
TRINITY_DN49918_c0_g1	3	7	5	51.001	42	17	12	1	8	49	10	20
TRINITY_DN45438_c0_g1	1	0	1	33.698	22.001	4	22.178	1	9	3	3	0
TRINITY_DN64299_c0_g1	0	3	7	0	10	2	9	1	9	6	9	3
TRINITY_DN42907_c0_g1	0	18	1	0	1	29	4	1	9	14	0	15
TRINITY_DN35083_c1_g1	7	0	1	0	3	0	3	1	10	0	4	2
TRINITY_DN82359_c0_g1	0	3	4	521	673	2	71	1	10	0	32	124
TRINITY_DN7795_c0_g3	6	18	4	2	1	1	0	1	10	3	13	7
TRINITY_DN8235_c0_g1	4	57	39	17	8	11	6	1	10	21	10	15
TRINITY_DN89634_c0_g2	0	2.426	3	2	8	0	0	1	10.215	0	19	4.045
TRINITY_DN40884_c0_g1	2	1	1	0	5	0	1	1	11	1	6.503	1
TRINITY_DN52512_c0_g2	0	1	13	5	2	2	1	1	11	5	3	3
TRINITY_DN35261_c0_g1	6	44	5	17	20	22	12	1	11	6	2	17
TRINITY_DN32040_c0_g1	1	5.962	29	7	7	1	2	1	11.192	9	38.614	0
TRINITY_DN33366_c0_g1	0	0	0	12	0	2	4	1	12	0	4	1
TRINITY_DN8226_c1_g1	0	2	13.228	18	34	42.999	4	1	12	4	2	12
TRINITY_DN52653_c0_g1	0	1	1	589	169.999	12	25	1	12	4	20	107.999
TRINITY_DN18947_c0_g1	1	90	106	130	14	5	29	1	12	10	11	45
TRINITY_DN45604_c0_g1	0	2	3	2	0	4	10	1	15	0	1	2
TRINITY_DN38057_c0_g1	0	0	1	0	0	2	0	1	15	6	0	0
TRINITY_DN24713_c0_g1	0	0	0	6	17.158	5	5	1	15.003	0	4	6
TRINITY_DN26888_c0_g2	0	0	12	0	1	9.011	4	1	16	3	6	0
TRINITY_DN2590_c0_g1	0	0	2	223	188	1	88	1	17	3	10	120
TRINITY_DN122962_c0_g1	1	2	10	0	5	0	3	1	18	6	7	4
TRINITY_DN32374_c1_g1	0	4.036	0.99	10.041	19	6	6.053	1	18	7	7.995	2
TRINITY_DN135_c0_g2	67.156	71.672	8.508	10	54.307	16.435	19.564	1	18.45	7	2	13.711
TRINITY_DN34418_c0_g1	0	13	1	4	0	0	8	1	19	8	2	6
TRINITY_DN11685_c0_g3	0	0	1	6	0	1	16	1	21	3	41	2
TRINITY_DN40897_c0_g1	0	1	0	0	1	4	5	1	22	1	10	33
TRINITY_DN7873_c0_g1	0	1	1	1459	665.001	0	110	1	22	3	34	154
TRINITY_DN23134_c0_g1	2	0	2	2	0	0	12	1	23	1	25	10
TRINITY_DN13413_c0_g1	1	3	4	39.999	81	16	25	1	24	17	33	14
TRINITY_DN59787_c0_g1	46	6	78	2	0	3	0	1	25	0	0	29
TRINITY_DN96453_c0_g1	4	0	0	0	24	1	15	1	25	10	0	1
TRINITY_DN143097_c0_g1	1	3	7	12	8	2	30	1	25	13	3	13
TRINITY_DN4804_c0_g1	13	34.934	156.004	19.178	69	190.999	4	1	25	13	10.663	57
TRINITY_DN9631_c0_g1	1	0	0	1679	1443	0	90	1	27	0	46	228
TRINITY_DN4180_c0_g1	0	3	0	994	357	2	53	1	27	3	52	96.999
TRINITY_DN25389_c2_g2	1	16	3	0	15	6	23	1	27	14	31	0
TRINITY_DN56925_c0_g1	26	0	4	0	0	8	3	1	28	13	3	0
TRINITY_DN34365_c0_g1	0	128	25	10	5	2	15	1	29	21	36	2
TRINITY_DN14651_c0_g1	0	5	0	1	0	6	7	1	33	10	0	9
TRINITY_DN55869_c1_g1	0	1	19	1	7	0	0	1	38	0	0	0
TRINITY_DN16798_c0_g2	4	3	0	0	5	7.999	0	1	38.898	0	0	1
TRINITY_DN42666_c1_g1	1	6	3	28	19	3	26	1	39	4	44	9
TRINITY_DN46901_c0_g1	1	0	0	0	0	62	0	1	40.001	0	0	0
TRINITY_DN36401_c0_g1	1	1	8	3	3	1	16.999	1	42.001	1	41	13
TRINITY_DN73481_c0_g1	0	0	1	0	0	5	0	1	46	0	30	0
TRINITY_DN26676_c0_g1	0	0	1	97.999	0	1	0	1	63	0	1	1
TRINITY_DN32169_c0_g1	0	3	33	10	0	0	13	1	65	32	47	33
TRINITY_DN3950_c0_g1	30	81	71	87	33	42	262.999	1	69.346	74.003	199.091	57.001
TRINITY_DN40155_c0_g1	0	4	0	3	0	14	99	1	117	13	0	0
TRINITY_DN24239_c0_g1	6	0	1	0	3	2	1	1	126.999	96.999	0	0
TRINITY_DN8327_c0_g1	48	46	11	60	8.001	101	296	1	130	270	177	107
TRINITY_DN42484_c1_g1	1	21	2	1	0	0	0	1	150	3	1	1
TRINITY_DN764_c0_g3	0	0	85.235	158.205	214.859	47.974	105.172	1.016	34.097	22.061	40.828	1.013
TRINITY_DN1330_c0_g2	0	0	0	0	52.791	13.387	37.257	1.026	26.743	18.693	4.094	9.583
TRINITY_DN28601_c0_g1	0	0	9	6	1	0	0	1.031	1	5	4	2
TRINITY_DN24874_c0_g1	2	1.08	10	8.992	2	3	4	1.037	5	0	14.991	1
TRINITY_DN24717_c0_g1	3	2	18	0	7	22.523	0	1.044	25.548	14.707	170.922	0
TRINITY_DN2575_c0_g2	0	4.341	3.213	1.103	4.249	2.206	0	1.079	6.496	0	2.113	7.611
TRINITY_DN32474_c0_g2	1.054	0	7.643	13.688	6.484	1.059	6.514	1.079	6.646	9.589	2.199	6.339
TRINITY_DN30991_c0_g1	7	3	14.467	5	0	5	0	1.222	12	2.999	3	2
TRINITY_DN7328_c0_g2	2.125	1.091	2.109	12.014	18.01	2.262	8.601	1.258	0	6.978	3.222	10.098
TRINITY_DN81553_c0_g1	0	3.998	0	6	5	4.999	10.009	1.469	6	4.999	8	1.004
TRINITY_DN90106_c0_g1	0	0	2.138	5.044	0.984	4.657	5.276	1.962	3.257	1.185	0	2.001
TRINITY_DN73118_c0_g1	0	2.063	5	0	15.002	9	10	1.966	0.903	6	23	3
TRINITY_DN151835_c0_g1	2	2	1	0	3	0	0	1.976	11	0	21	0
TRINITY_DN51487_c0_g3	0	17	0	0	10	0	0	2	0	0	0	0
TRINITY_DN100784_c0_g1	0	1	11	2	0	0	6	2	0	0	0	0
TRINITY_DN68538_c0_g2	5	0	17	2	0	25	0	2	0	0	0	0
TRINITY_DN16376_c0_g3	7	2	3	5	1	2	9	2	0	0	0	2
TRINITY_DN19212_c0_g1	0	0	0	47	0	0	0	2	0	0	0	25
TRINITY_DN57367_c0_g2	0	6	0	0	0	0	14	2	0	1	0	0
TRINITY_DN13498_c0_g2	0	32	2	1	133	6	0	2	0	1	0	0
TRINITY_DN109710_c0_g1	2	8	6	2	1	0	0	2	0	1	0	0
TRINITY_DN14143_c1_g1	20	10	80.96	1	4	4	0	2	0	1	1	0
TRINITY_DN73522_c0_g1	0	0	0	15	9	0	0	2	0	1	1	6
TRINITY_DN13951_c2_g1	0	0	0	7	2	6	5.999	2	0	1	2	0
TRINITY_DN31224_c0_g1	0	0	1	12	15	3	4	2	0	1	2	3
TRINITY_DN186598_c0_g1	1	1	9	0	0	0	3	2	0	1	9	1
TRINITY_DN59224_c0_g1	0	1	8	1	1	0	0	2	0	1	10	2
TRINITY_DN10001_c0_g1	90	1	0	0	0	0	0	2	0	1	883.001	2
TRINITY_DN51161_c0_g1	0	1	1	2	6	19	13	2	0	2	1	7
TRINITY_DN10096_c0_g1	2	1	0	19	6	0	157	2	0	3	0	17
TRINITY_DN108079_c0_g1	0	5	7	2	2	2	0	2	0	3	25	0
TRINITY_DN156379_c0_g3	0	10	0	9	5	1	1	2	0	4	0	6
TRINITY_DN5382_c1_g2	0	20	4	19	36	23	37	2	0	4	7	5
TRINITY_DN61657_c0_g1	1	11	6	4	8	22	10	2	0	6	0	2
TRINITY_DN29728_c0_g1	0	7	1	6	3	3	3	2	0	6	1	2
TRINITY_DN63846_c0_g2	0	0	2	65	59	12	27	2	0	6	11	0
TRINITY_DN51423_c0_g1	1	10.958	14.645	2.022	1	2.001	3	2	0	11	5	4
TRINITY_DN14572_c0_g1	0	244	81	14	11	2	0	2	0	16	13	25.001
TRINITY_DN24430_c0_g1	1	6	9	5	1	0	6	2	0	20	5	5
TRINITY_DN31130_c1_g3	0	4	9	13	28	2	7	2	0	24	3	17
TRINITY_DN36260_c0_g1	8	0	22	6	19	44	18	2	0	28	38	0
TRINITY_DN8095_c1_g3	4	0	1	0	19	9	20	2	0	50.001	21	2
TRINITY_DN69157_c0_g1	0	161	204	0	1	0	2	2	0	51	48	46
TRINITY_DN26325_c0_g1	0	11	0	0	0	9	0	2	1	0	0	0
TRINITY_DN29363_c0_g1	0	0	0	68	15	0	2	2	1	0	1	2
TRINITY_DN92798_c0_g1	1	3	4	6	8	3	13	2	1	0	3	4
TRINITY_DN43636_c0_g1	0	9	2	9	1	0	1	2	1	0	5	6
TRINITY_DN9440_c0_g1	0	4	0	0	4	2	6	2	1	1	1	24
TRINITY_DN9337_c1_g1	0	0	5	7	0	2	6	2	1	1	7	3
TRINITY_DN15401_c1_g3	2	0	2	0	1	0	7	2	1	1	22	4
TRINITY_DN281965_c0_g1	1	1	0	4	13	8	0	2	1	2	1	4
TRINITY_DN23049_c0_g1	1	3	0	1	2	24	24	2	1	2	16	49
TRINITY_DN100063_c0_g1	0	0	0	20	8	0	1	2	1	2	30	2
TRINITY_DN9915_c0_g4	0	4	2	54	7	9	7	2	1	2	31	3
TRINITY_DN23383_c0_g2	4	5	5	4	6	7	13	2	1	3	1	2
TRINITY_DN16027_c0_g1	1	33	1	29	52	563	32	2	1	11	5	16
TRINITY_DN2076_c2_g1	0	1	0	9	1	4	3	2	1	18	8	6
TRINITY_DN60511_c0_g2	0	50	44	1	0	1	11	2	1	18	14	38
TRINITY_DN48793_c0_g1	0	4	2	3	11	10	45	2	1	66.239	10	24
TRINITY_DN23575_c0_g1	1	0	0	22	3	4	0	2	1	378	39	5
TRINITY_DN30080_c0_g3	0	0	2	21	10	1	1	2	2	0	3	0
TRINITY_DN19428_c0_g3	4	92	15	0	4	0	0	2	2	0	6	3
TRINITY_DN65333_c0_g1	0	2	6	0	1	4	3	2	2	1	14	2
TRINITY_DN60455_c0_g1	0	4	0	15	7	19	18	2	2	2	3	14
TRINITY_DN21949_c0_g1	5	2	1	3	9.68	5	1	2	2	2	7	1
TRINITY_DN87005_c0_g1	5	7	4	2	6	8	15.001	2	2	2	20.999	7
TRINITY_DN48631_c0_g2	5	0	0	1	7	3	1	2	2	4	4	16
TRINITY_DN33401_c0_g1	1	7	23	0	1	0	0	2	2	4	26	3
TRINITY_DN51580_c0_g1	2	2	0	3	8	3	3	2	2	7	3	4
TRINITY_DN8952_c0_g1	0	41	13.999	5	2	0	3	2	2	7	4	9
TRINITY_DN14698_c0_g1	1	44	110	17	15	13	6	2	2	7	36	25
TRINITY_DN35584_c0_g1	0	3	3	0	6	5	10	2	2	8	15	0
TRINITY_DN126676_c0_g1	0	15	18	2	3	3	3	2	2	11	6	7
TRINITY_DN31029_c0_g1	1	6	6	3	13	9	2	2	2	16	3	20
TRINITY_DN49203_c0_g1	0	109	99	0	1	1	0	2	2	30	17	21
TRINITY_DN88362_c0_g1	0	99	129	1	1	1	20	2	2	41	47	51
TRINITY_DN26145_c0_g1	0	6.951	1	1	2.008	11.048	41.135	2	2.017	6	1.006	6.093
TRINITY_DN19428_c0_g1	2	4	1	3	7	11	1	2	3	0	9	1
TRINITY_DN34843_c0_g1	0	1	1	144.001	124.999	0	13	2	3	1	3	6
TRINITY_DN13845_c0_g1	0	0	1	2	4	4	6	2	3	1	8	0
TRINITY_DN54077_c0_g1	0	1	6	0	0	0	4	2	3	1	22	4
TRINITY_DN27_c2_g1	0	0	4	11	0	5	5	2	3	2	6	3
TRINITY_DN13949_c1_g2	0	2	0	0	8	7	2	2	3	3	0	2
TRINITY_DN52705_c1_g1	1	1	10	0	2	6	4	2	3	3	4	1
TRINITY_DN70155_c0_g1	2	0	11	4	3	13	3	2	3	4	17	5
TRINITY_DN64066_c0_g1	0	21	31	1	0	1	1	2	3	6	13	8
TRINITY_DN44901_c0_g1	1	4	6	12	28	5	4	2	3	7	2	3
TRINITY_DN41411_c0_g1	4	15	10	4	2	4	4	2	3	7	5	0
TRINITY_DN54284_c0_g3	8	2	2	0	7	3.013	2	2	3	12.632	1	7
TRINITY_DN33380_c0_g2	0	5	0	10	6.999	1	1	2	3	13	1	2
TRINITY_DN66704_c0_g1	0	1.878	0	8	7	6	4	2	3.064	3	5	3
TRINITY_DN20536_c0_g1	0	6	3	6	4	4	4	2	3.998	4	5	0
TRINITY_DN63216_c0_g1	6	0	2	0	1	1	6	2	4	0	0	0
TRINITY_DN22512_c0_g1	0	2	22	4	3	9	0	2	4	0	0	0
TRINITY_DN36227_c0_g1	0	0	0	10	17	0	5	2	4	0	2	1
TRINITY_DN130182_c0_g1	0	0	0	101	81	0	12	2	4	0	3	26
TRINITY_DN23002_c1_g1	0	0	0	9	18	1	1	2	4	1	4	9
TRINITY_DN4196_c0_g1	0	1	1	102	49	0	23	2	4	1	9	25
TRINITY_DN24588_c0_g2	0	2	0	2	0	7	3	2	4	2	1	10
TRINITY_DN77451_c0_g1	1	1	2	3	3	9	12	2	4	2	3	11
TRINITY_DN8742_c0_g2	5	10	1	203	119	5	22	2	4	2	6	57
TRINITY_DN69145_c0_g1	1	2	0	1	13	8	2	2	4	5	0	2
TRINITY_DN48673_c0_g1	0	18	2	0	4	5	5	2	4	7	0	18
TRINITY_DN16836_c0_g1	0	2	9.997	4	0	12	2	2	4	8	10	7
TRINITY_DN69285_c0_g1	1	7	3	4	6	21	13	2	4	13	10	10
TRINITY_DN27977_c0_g3	1	7	1	3	14	1	5	2	4	14	2	5
TRINITY_DN13289_c0_g1	5	3	7	7	20	53	15	2	4	15	4	11
TRINITY_DN44118_c0_g1	2	16	35	4	23	4	3	2	4	30	16	7
TRINITY_DN41109_c0_g1	0	247	25	4	4	7	73.999	2	4	34	20	18
TRINITY_DN12355_c0_g1	6	1348	99	0	4	0	2	2	4	75	65	25
TRINITY_DN18651_c0_g1	1	53.871	10	20	12	3	9	2	5	0	2	1
TRINITY_DN37710_c0_g1	0	5	0	1	6	28	23	2	5	1	1	4
TRINITY_DN12227_c0_g2	1	6	3	2	23	12	5	2	5	4	8	2
TRINITY_DN34172_c0_g1	0	31	9	8	1	5	2	2	5	6	1	8
TRINITY_DN12138_c0_g1	1	0	0	0	15	5	2	2	6	0	0	0
TRINITY_DN34253_c0_g1	0	11	121	0	1.006	213	0	2	6	0	0	0
TRINITY_DN7779_c0_g2	0	4	1	0	2	4	14	2	6	0	2	6
TRINITY_DN22860_c0_g1	7	3	0	4	31	8	0	2	6	0	7	15
TRINITY_DN33136_c0_g1	0	3	0	4	6	4	4	2	6	1	2	3
TRINITY_DN10992_c0_g1	3	8	0	3	16	68	11	2	6	3	2	30.001
TRINITY_DN25959_c0_g1	2	2	1	0	0	6	19	2	6	10	6	4
TRINITY_DN157291_c0_g1	0	2	1	14.016	10	2	10	2	6	11	3	4
TRINITY_DN93867_c0_g1	1	10	0	2	13	19	5	2	6	11	7	2
TRINITY_DN22193_c0_g1	3	1	19	0	0	37	1	2	6	19	21	6
TRINITY_DN13440_c0_g1	3	40	48	3	7	2	4	2	6	24	22.999	21
TRINITY_DN8345_c1_g1	1	7	0	9.975	8	9	5	2	6.985	2	4	3
TRINITY_DN43685_c0_g1	0	0	3	8	0	0	0	2	7	1	0	1
TRINITY_DN39662_c0_g2	5	2	9.994	3	0	5	0	2	7	1	7.994	2
TRINITY_DN18376_c0_g1	0	15	2	2	6	1	5	2	7	2	0	3
TRINITY_DN29826_c0_g1	7	14	1.999	4	15	13	1	2	7	4	8	12.999
TRINITY_DN35339_c0_g1	1	5	0	8	6	2	17	2	7	7	6	3
TRINITY_DN24789_c0_g1	0	0	8	0	1.059	2	0	2	7	9	0	0
TRINITY_DN31656_c0_g1	0	9.917	5.378	9.762	9	9	4	2	8	0	8	4.996
TRINITY_DN26339_c0_g1	1	2	9.001	0.993	9	14	33.983	2	8	0	9.999	2
TRINITY_DN85394_c0_g1	0	4	2	2	1	49	10	2	8	3	5	16
TRINITY_DN32554_c0_g1	1	4	0	4.698	5	0	2	2	8	3.059	1	9
TRINITY_DN10240_c0_g1	1	1	2	19	26	13	7	2	8	4	3	7
TRINITY_DN22995_c0_g2	2	14	4	0	9	1	1	2	8	5	11	7
TRINITY_DN9447_c2_g1	8	3	19	0	1	0	10	2	8	5	24	1
TRINITY_DN6424_c1_g1	3	0	0	0	0	6	4	2	8	6	6	3
TRINITY_DN26486_c0_g1	1	6	1	10	7	8	17	2	8	12	6	9
TRINITY_DN44009_c0_g1	4	4	1	3	48.999	47	1	2	8	68	5	5
TRINITY_DN88087_c0_g1	6.002	0	29.525	11	0	0	22.452	2	9	0	7	10.001
TRINITY_DN14897_c1_g2	0	1	9	2	1	4	4	2	9	4	1	1
TRINITY_DN51922_c0_g1	0	0	0	2	3	2	4	2	9	4	5	6
TRINITY_DN28061_c0_g1	0	5	0	28	11	4	28	2	9	10	1	9
TRINITY_DN53324_c0_g1	0	9	8.001	4	5	1	14	2	9	11	15	3
TRINITY_DN12885_c0_g1	43	26	22	15	97.999	12	8	2	9	18	22.001	13.999
TRINITY_DN61593_c0_g1	1	0	4	16	15	0	12	2	10	0	24	2
TRINITY_DN58522_c0_g1	0	0	25	2	9	0	0	2	10	4	0	0
TRINITY_DN33171_c0_g1	0	8	2	2	4	18	11	2	10	6	5	8
TRINITY_DN58831_c0_g1	0	4	1	5	0	6	4	2	10	11	3	18
TRINITY_DN130243_c0_g1	3	11	5	3	9	4	4	2	11	0	2	3
TRINITY_DN13236_c0_g3	0	0	0	188	47	1	23	2	11	0	4	30
TRINITY_DN57193_c0_g2	0	4	4	0	0	0	12	2	11	5	29	11
TRINITY_DN13364_c0_g1	1	1	0	139	94.001	13	31	2	11	6	16.001	81
TRINITY_DN30163_c0_g1	1	1	5	8	1	8	1	2	11	7	3	0
TRINITY_DN38985_c0_g1	1	0	9	16	19	88	50	2	11	11	7	11
TRINITY_DN8885_c0_g1	0	3	7	0.987	2	23	4	2	11.932	172.162	1	3.993
TRINITY_DN47528_c0_g1	2	1	0	3	1	7	2	2	12	1	6	0
TRINITY_DN18733_c1_g1	2	2	1	1	6	4	21	2	12	4	9	5
TRINITY_DN12323_c0_g1	1	8	6	20	21	9	52	2	12	5	12.001	0
TRINITY_DN12422_c0_g1	0	0	0	8	0	9	0	2	13	13	2	0
TRINITY_DN22639_c0_g1	11	62	27	24.999	32.999	32	5	2	13	74	21	147
TRINITY_DN4865_c0_g1	1	0	1	1692	983	0	65	2	14	1	48	195
TRINITY_DN614_c5_g1	12	1	16	4	3	4	1	2	15	0	1	1
TRINITY_DN12552_c0_g1	1	0	0	149	109	0	46	2	15	4	4	72
TRINITY_DN11632_c1_g1	9	136	15	9	7	97	101	2	15.001	24	30	33
TRINITY_DN19697_c0_g1	1	0	11	2	1	4	11	2	18	8	23	3
TRINITY_DN69077_c0_g1	2	10	1	0	10	2	4.975	2	19	5	9	2
TRINITY_DN18575_c0_g1	2	2	0	0	16	0	0	2	20.999	24	0	17.276
TRINITY_DN66815_c0_g1	0	0	7	1	1	2	2	2	21	1	0	0
TRINITY_DN53236_c0_g1	4	1	33	1	0	1	2	2	21	1	16	4
TRINITY_DN4422_c0_g4	2	6	13	15	4	13	32	2	24	4	27	2
TRINITY_DN26837_c0_g1	1	14	5	0	30	1	4	2	24	10	17	4
TRINITY_DN7607_c0_g1	10	3	224	0	9	4	26	2	24	15	13	35
TRINITY_DN45870_c0_g1	0	0	4	0	1	3	0	2	25	0	39	0
TRINITY_DN44898_c0_g2	0	31	4	69	2	0	36	2	25	19	1	1
TRINITY_DN24395_c0_g1	3	4	9	1	1	8	16	2	26	6	16	5
TRINITY_DN24296_c0_g1	0	2	0	1	0	13	9	2	26	11	2	73
TRINITY_DN29139_c0_g1	0	3	30.001	0	0	0	4	2	27	10	46	5
TRINITY_DN9054_c6_g3	2	0	17	15	25	3	44	2	29	21	18	19
TRINITY_DN72555_c0_g1	0	11	4	25	78.001	13	18	2	38.999	16	18	38
TRINITY_DN11083_c1_g1	2	32	5	58	102	11	12	2	39	16	7	66
TRINITY_DN8665_c2_g1	14	0	6	16	7	85	46	2	39	36	0	27
TRINITY_DN16205_c0_g1	0	0	0	2	23	2	37	2	62	1	167	0
TRINITY_DN17048_c0_g1	3	22	3	4	76	59.001	11	2	125	71	64	9
TRINITY_DN512_c0_g2	5	4	11	517	110.999	396	293	2	155	68.001	81	99
TRINITY_DN85718_c0_g1	1	1	0	6	0	4	0	2.006	1	0	7	4
TRINITY_DN5145_c0_g2	9.049	11.456	15.624	2.292	9.96	5.956	5.941	2.137	7.592	5.532	3.416	1.156
TRINITY_DN8556_c0_g1	7	169.132	2.295	0	258.62	168.406	149.683	2.162	0	175.998	0	0
TRINITY_DN9252_c0_g2	1.057	0	0	1.024	4.224	3.639	7.016	2.257	5.568	6.638	3.283	4.401
TRINITY_DN18925_c0_g2	1.137	1.148	0	3.52	2.279	6.88	11.39	2.294	4.595	8.212	4.551	15.309
TRINITY_DN54126_c0_g2	1	5	5.003	0	2	4	0	2.366	10	0	5	2
TRINITY_DN8052_c0_g1	5.289	17.63	2.378	12.018	0	4.246	2.534	2.623	48.299	12.684	16.065	3.336
TRINITY_DN41248_c0_g1	0	0	0	24.999	13.569	1	0	2.746	0	0	0	0
TRINITY_DN39225_c0_g1	1	1	7.901	0	10.604	4	4.991	2.955	2	5	1.958	3
TRINITY_DN17624_c0_g1	9	6	2	0	0	0	1	2.964	0	0	9	3
TRINITY_DN41065_c0_g1	5	14	32.68	30.814	22	28.873	25.429	2.979	2	5	13	21.453
TRINITY_DN59545_c0_g1	10	15	20	0	10	14	17	3	0	0	0	1
TRINITY_DN19053_c0_g1	0	0	2	126.001	81	2	18	3	0	0	2	12.999
TRINITY_DN88348_c0_g1	0	2	3	7	23	2	1	3	0	0	3	4
TRINITY_DN37722_c0_g1	6	1	3	0	5.998	4	7	3	0	0	13.724	0
TRINITY_DN6691_c0_g1	56.999	18	306	5	11	4	11	3	0	1	1	215
TRINITY_DN10436_c0_g1	3.173	1	24.518	10.319	0	3	9.034	3	0	1.032	20.346	1.035
TRINITY_DN37708_c0_g1	0	0	0	62	33.001	1	12	3	0	2	5	3
TRINITY_DN128030_c0_g1	0	9.999	3	2	1	2	7.887	3	0	3	0	0
TRINITY_DN43564_c0_g1	0	1	2	7	38	103	37	3	0	3	0	10
TRINITY_DN69655_c0_g1	0	0	1.13	7	2	0	2	3	0	3	6	1
TRINITY_DN15955_c0_g1	0	2	6	3	0	2	2	3	0	3	11	5
TRINITY_DN27003_c0_g1	0	2	0	8	6	5	15	3	0	4	0	3
TRINITY_DN46899_c0_g1	0	14	5	13	37	14	18	3	0	5	5	7
TRINITY_DN99537_c0_g1	0	1	0	9	1	1	4	3	0	6	1	0
TRINITY_DN26297_c0_g1	0	8	6	1	0	0	3	3	0	7	0	12
TRINITY_DN13625_c0_g2	4	8	9	0	1	0	5	3	0	7	16	0
TRINITY_DN140095_c0_g1	0	1	3	1	2	3	6	3	0	8	1	4
TRINITY_DN22808_c0_g1	0	27	94	0	0	0	87	3	0	13	0	11
TRINITY_DN27840_c0_g1	2	4	4	7	1	3	7	3	0	13	11	3
TRINITY_DN38338_c0_g1	0	7	28	22	28	7	27	3	0	14	7	11
TRINITY_DN58562_c0_g1	3	0	3	2	8	1	1	3	0	17	1	2
TRINITY_DN45969_c0_g1	1	4	0	0	2	9	6	3	1	0	0	0
TRINITY_DN21140_c0_g1	1	2	1	0	3	7	1	3	1	1	1	6
TRINITY_DN40486_c1_g2	0	40.606	6.013	0	0	0	9.002	3	1	1	2	7.06
TRINITY_DN15193_c0_g1	0	5	0	0	1	3	22	3	1	1	4	154
TRINITY_DN82203_c0_g1	2	5	0	0	7	0	8	3	1	1	6	4
TRINITY_DN79271_c0_g1	0	0	5	3	1	4	17	3	1	1	7	0
TRINITY_DN58904_c0_g1	0	14	1	3	1	0	3	3	1	1	7	3
TRINITY_DN35128_c0_g1	0	1	3	8.998	1.997	0	3	3	1	1	22	5
TRINITY_DN41097_c0_g1	3.716	1	9.008	1	2	2.002	5	3	1	2	2.999	5.551
TRINITY_DN72241_c0_g1	0	0	6	1	12	1	5	3	1	3	2	1
TRINITY_DN37503_c0_g1	0	1	18	0	4	4	6	3	1	4	0	1
TRINITY_DN59149_c0_g1	0	14	6	1	0	3	1	3	1	4	0	4
TRINITY_DN28992_c0_g1	0	0	5	0	0	0	0	3	1	6	9	6
TRINITY_DN43706_c0_g1	1	8	3	1	7	7	6.657	3	1	7	6	7
TRINITY_DN114279_c0_g1	0	1	5	1	2	0	3	3	1	7	7	0
TRINITY_DN36314_c0_g2	2	2	6	27	27	33	6	3	1	8	7	16
TRINITY_DN17966_c0_g1	4	10	5	28	66	25	12	3	1	10	0	31
TRINITY_DN9858_c0_g1	0	20	5	6	4	31	64	3	1	11	1	36
TRINITY_DN14244_c1_g2	5	490.001	27.001	10	104	7	2	3	1	11	2	7.999
TRINITY_DN1304_c6_g1	2	3	2	2	19	10	0	3	1	14	1	8
TRINITY_DN8740_c0_g1	52.096	3	0	1	2	1	0	3	1	16	5	48.558
TRINITY_DN15107_c0_g1	0	40	78	0	0	2	3	3	1	33.999	13	12
TRINITY_DN29156_c0_g1	3.11	0	51.376	5	7	1	1	3	2	0	2	0
TRINITY_DN90532_c0_g1	1	0	1	0	0	9	6	3	2	0	3	7
TRINITY_DN22671_c0_g1	0	4	0	0	6	7	0	3	2	0	5	5
TRINITY_DN19377_c0_g1	3	17.999	5	9	7	8	15	3	2	1	4	10
TRINITY_DN22479_c0_g1	1	3	2	1	7	3	6	3	2	2	4	2
TRINITY_DN2973_c0_g1	2	2	97.999	116	157	31	21	3	2	2	22.001	35.001
TRINITY_DN18984_c0_g2	0	17.001	469	12	8	10	14	3	2	3	1	14
TRINITY_DN144587_c0_g1	0	16	6	0	8	0	0	3	2	5	0	6
TRINITY_DN20005_c0_g1	14	120.001	10	6	13	5	6	3	2	5	0	9
TRINITY_DN46906_c0_g2	3	5	1	0	2	0	9	3	2	5	8	6
TRINITY_DN126487_c0_g1	1	4	1	4	6	8	0	3	2	7	3	3
TRINITY_DN11250_c0_g1	9	48	11	7	1	9	26	3	2	8	2	9
TRINITY_DN7157_c0_g2	1	20	0	4	7	5	22	3	2	8	3	7
TRINITY_DN20266_c0_g1	8	1	1	11	13	1	5	3	2	9	3	9
TRINITY_DN41599_c0_g1	11	1	4	4	3	7	5	3	2	9	6	1
TRINITY_DN14278_c0_g1	0	49	25	2	0	343	2	3	2	10	5	20
TRINITY_DN14132_c1_g1	4	3	2	0	8	4	12.993	3	2	10	6	2
TRINITY_DN63772_c0_g1	0	3	6	0	1	0	3	3	2	10	7	1
TRINITY_DN23805_c0_g1	0	0	5	3	1	1	3	3	2	10	15	0
TRINITY_DN29624_c0_g2	22	12	0	3	6	66	15	3	2	17	1	30
TRINITY_DN44458_c0_g1	2	0	2	14	11.999	6	9	3	2	26	7	16
TRINITY_DN24014_c0_g1	0	132.999	144	0	0	2	10	3	2	29	29	57.001
TRINITY_DN37698_c0_g1	0	250	180	0	1	1	5	3	2	36	35	32
TRINITY_DN17046_c0_g1	0	231	322	3	0	34	233	3	2	48	77	94
TRINITY_DN43369_c0_g1	1	0	1	7	4	3	6	3	3	0	14	2
TRINITY_DN30032_c0_g1	3	7	5	2	31.992	3	6	3	3	0	25.001	16
TRINITY_DN66560_c0_g1	0	1	4	4	9	1	0	3	3	1	6	0
TRINITY_DN14376_c0_g2	13	48	0	0	0	114	26	3	3	2	4.096	29
TRINITY_DN120943_c0_g1	5	2	14	0	0	0	0	3	3	4	15	6
TRINITY_DN45395_c0_g1	0	20	8	0	4	7	6	3	3	5	0	4
TRINITY_DN39291_c0_g1	1	7	0	1	3	1	12	3	3	6	2	8
TRINITY_DN25197_c0_g1	0	10.999	3	8	6	0	5	3	3	9	2	2
TRINITY_DN52705_c0_g1	0	4	0	26	7	31	6	3	3	16	3	5
TRINITY_DN11608_c0_g1	2	38.001	0	4	110	27	9	3	3	32	7	7
TRINITY_DN56395_c0_g1	0	6	0	1	3	1	1	3	4	0	3	18
TRINITY_DN26703_c0_g1	0	5	1	12.999	2	4	8	3	4	1	4	2
TRINITY_DN20743_c0_g1	1	5	0	5	11	11	11	3	4	1	5	6
TRINITY_DN2326_c1_g1	0	0	0	188	141	3	49	3	4	1	8	30
TRINITY_DN33775_c0_g1	1	6	0	0	1	6	0	3	4	1	32	0
TRINITY_DN35833_c0_g1	2	8	3	8	9	4	6	3	4	2	5	5
TRINITY_DN76140_c0_g1	0	2	0	6	4	8	9	3	4	2	7	26
TRINITY_DN36370_c1_g1	0	5	0	10.962	0	3	5.112	3	4	3	30.001	0.951
TRINITY_DN18738_c0_g1	0	3	6	3	6	9	1	3	4	4	4.044	1
TRINITY_DN24480_c0_g1	1	1	0	17	13	4	1	3	4	8	2	2
TRINITY_DN26671_c0_g1	0	12	1	8.999	3.999	12	10	3	4	8	5.001	14
TRINITY_DN53245_c0_g1	0	35	46	2	0	0	2	3	4	11	21	23
TRINITY_DN10228_c0_g1	1	8	4	28	4	10	19	3	4	13	3	21
TRINITY_DN67655_c0_g1	0	10	1	4	9	4	5	3	4	15	3	5
TRINITY_DN32603_c0_g1	0	0	0	154	35	2	9	3	5	0	8	46
TRINITY_DN34806_c0_g1	0	5	4	1	6	8	10	3	5	4	3	9
TRINITY_DN27412_c0_g1	2	7	16	9	9	6	21	3	5	4	4	29
TRINITY_DN70777_c0_g1	0	1	0	8	2	1	6	3	5	5	8	10
TRINITY_DN61071_c0_g1	6	3	0	15	14	5	1	3	5	7	1	14
TRINITY_DN9302_c0_g1	3	0	9	744.918	218.742	2	50	3	5	8.999	23	93.975
TRINITY_DN12268_c0_g1	4	8	5	14	7	9	7	3	5	9	4	6
TRINITY_DN4151_c1_g1	6	4	72	17	10	16	23	3	5	10	43	7
TRINITY_DN14001_c0_g1	0	4	2	0	6	5	6	3	5	12	15	1
TRINITY_DN10605_c0_g2	0	8.999	1	1	5	17	4	3	5.001	2	3	2
TRINITY_DN14412_c0_g1	0	1	0	0	0	4	7	3	6	0	11	2
TRINITY_DN48878_c0_g1	0	82	0	2	1	0	5	3	6	1	4	26
TRINITY_DN12866_c0_g1	0	0	0	262	123	1	31	3	6	3	8	48
TRINITY_DN12229_c0_g1	1	2	3	661	138	9	32	3	6	3	21	59
TRINITY_DN63481_c0_g1	0	8	3	9	2	17	17	3	6	6	7	7
TRINITY_DN6064_c0_g1	35	1	25	1	84	279.999	6.001	3	6	6	9	4
TRINITY_DN3083_c3_g1	1	30.001	12	8	0	4	2	3	6	7	1	18
TRINITY_DN69842_c0_g1	0	6	3	0	5	3	2	3	6	7	12	2
TRINITY_DN17568_c0_g1	0	1	9	0	1	0	7	3	6	7	68.006	10
TRINITY_DN54478_c0_g1	11	2	6	2	8	3	2	3	6	11	7	11
TRINITY_DN23254_c0_g3	2	1	0	4	5	5	0	3	6	12	12	8
TRINITY_DN130758_c0_g1	0	1	0	0	3	4	0	3	6	13	2	0
TRINITY_DN24023_c0_g2	1	1	18	8	2	6	7	3	6	13	16	0
TRINITY_DN56594_c0_g1	1	1	2	5	23	3	2	3	7	1	1	2
TRINITY_DN83658_c0_g1	0	0	0	34	1	2	10	3	7	8	7	5
TRINITY_DN20652_c0_g1	3	3	5	8	5	15	70	3	7	11	1	12
TRINITY_DN7794_c1_g1	1	106	143	50	48	38	35.001	3	7	11	10	2
TRINITY_DN38074_c0_g1	1	0	10	0	0	0	0	3	8	0	0	9
TRINITY_DN28461_c0_g1	3	3	6	3	3	23	8	3	8	1	11	7
TRINITY_DN53484_c0_g1	0	0	0	22	27	1	12	3	8	3	2	11
TRINITY_DN18358_c0_g1	0	56	4	3	15	4	4	3	8	4	4	5
TRINITY_DN19512_c0_g1	1	9	6	6	5	17	19	3	8	4	4	5
TRINITY_DN10212_c0_g1	1	148	47	14	103.001	36	15	3	8	13	9	22
TRINITY_DN15435_c0_g1	2	63	63	2	16	8	15	3	8	13	22	22.999
TRINITY_DN58922_c0_g1	2	5	14	0	0	4	5	3	9	1	8	0
TRINITY_DN123969_c0_g1	0	0	2	6	5	10	16	3	9	6	7	5
TRINITY_DN15401_c0_g2	3	5	13	23	12	5	6	3	10	4	25	4
TRINITY_DN280243_c0_g1	1	2	2	1	12	2	15	3	11	0	4	11
TRINITY_DN18706_c0_g2	4	3	6	0	0	5	3	3	11	7	7	0
TRINITY_DN36962_c0_g1	0	2	0	4	3	18	47	3	11	14	7	4
TRINITY_DN36406_c0_g1	2	5	13	10	6	5	5	3	12	2	11	3
TRINITY_DN24032_c0_g1	2	4	1	0	2	13	10	3	12	4	3	19
TRINITY_DN13095_c0_g1	8	11	1	7	5	9	14	3	12	7	4	8
TRINITY_DN43490_c0_g1	1	4	12	2	46	0	0	3	12	17	13	0
TRINITY_DN2208_c6_g1	0	12	5	1	0	25	1	3	13	19	12	4
TRINITY_DN37910_c0_g1	1	11	4	10	33	10	2	3	14	3	9	1
TRINITY_DN48547_c0_g1	1	2	4	2	0	1	4	3	14	5	13	0
TRINITY_DN2663_c0_g1	0	0	0	250	141	3	51	3	15	3	4	92
TRINITY_DN72028_c0_g1	3	5	15	1	4	3	13	3	15	13	19	16
TRINITY_DN48923_c0_g1	2	1	21.311	0	7.27	11.961	0	3	16	0	30.088	18
TRINITY_DN25581_c0_g1	0	2	1	4	3	6	14	3	16	14	5	3
TRINITY_DN31407_c0_g2	0	0	54	0	0	1	0	3	17	0	34	0
TRINITY_DN28340_c0_g1	0	5	2	12	5	0	3	3	17.999	8	13	5
TRINITY_DN9166_c0_g1	43	14	2	3	8	16	8	3	19	11	6	75
TRINITY_DN20678_c1_g1	6	8	168	6	13	8	64	3	20	95.001	4	95
TRINITY_DN128810_c0_g1	3	1	9	0	0	0	0	3	21	5	45	11
TRINITY_DN10647_c0_g1	0	1	2	591	408	7	32	3	23	3	18	77
TRINITY_DN2949_c3_g1	1	0	21	0	0	4	0	3	25	8	12	2
TRINITY_DN33787_c0_g1	5	100	45.999	79	83.999	0	8	3	28	11	10	2
TRINITY_DN79770_c0_g1	0	14	29	1	5	12	328	3	30	2	21	10
TRINITY_DN211229_c0_g1	2	0	0	414	505	2	113	3	44	8	24	238
TRINITY_DN8142_c0_g1	0	0	2	770	629.001	0	44	3	52	2	17	95
TRINITY_DN19167_c0_g1	0	3	0	0	0	0	2	3	57	1	80	8
TRINITY_DN11311_c0_g2	20	25.334	125.397	5	9	13	16.209	3	62	19	94.004	38
TRINITY_DN21699_c0_g1	5	8	3	32.999	17	0	47.999	3	84	13	27	38
TRINITY_DN17560_c0_g1	2	2	2	16	2	7	2	3	97.001	30	17.999	12
TRINITY_DN25698_c0_g1	1	65	3	3	14	141	9	3	105	64	2	142
TRINITY_DN8924_c0_g1	9	107.616	55.05	13.996	16.999	85.936	11	3	233.674	339.026	470.66	8.058
TRINITY_DN1930_c0_g2	0	0	0	5.089	3.022	0	10.037	3.04	1.005	4.169	3.045	1.007
TRINITY_DN5429_c0_g1	23.972	242.563	75.975	44.873	38.59	39.632	30.337	3.093	17.692	55.267	71.584	48.154
TRINITY_DN23133_c0_g1	1	0	14.067	4.996	0	3.001	0	3.166	0	1	8.848	5
TRINITY_DN6667_c0_g2	6	3.159	3.281	5.517	5.384	6.463	2.086	3.241	4.238	10.499	6.509	9.218
TRINITY_DN34602_c0_g1	1	0	5	6.001	3.004	0	9	3.405	2	0	1	0
TRINITY_DN4233_c0_g2	8.099	1.262	3.595	0	4.471	7.817	2.181	3.431	4.049	1.051	2.217	10.227
TRINITY_DN2619_c0_g2	2.369	8.044	5.931	14.781	11.827	4.677	7.033	3.477	8.315	12.882	4.518	12.99
TRINITY_DN123843_c0_g1	3	1.057	20	20.007	11	0	13.527	3.548	1.916	0	34.655	3.962
TRINITY_DN2808_c0_g2	0	3.438	2.708	2.442	2.602	0	2.277	3.568	12.994	5.901	6.174	2.346
TRINITY_DN95740_c0_g2	0	0	0	0	0	6	10	3.988	2	0	1	0
TRINITY_DN16228_c0_g1	0	0	2	0	9	2	6	3.999	2	1	3	3
TRINITY_DN16340_c0_g1	7	29	5	31.004	26.039	13.962	26	3.999	22	35	47.984	3
TRINITY_DN10450_c0_g4	0	0	0	0	0	4	7.799	4	0	0	9	0
TRINITY_DN121293_c0_g1	2	0	5	23	0	5	21.001	4	0	0	26	1
TRINITY_DN24777_c0_g2	0	1	7	2	38	1	1	4	0	1	0	0
TRINITY_DN29928_c0_g1	0	0	15	1	22	1	1	4	0	1	4	1
TRINITY_DN78833_c0_g1	7	2	0	10	4	0	4	4	0	3	4	4
TRINITY_DN33033_c0_g1	0	3	2	4	7	12	7	4	0	3	6	1
TRINITY_DN126833_c0_g1	1	5	0	0	0	19.992	0	4	0	3	27	4
TRINITY_DN112652_c0_g2	0	39	3	4	8	3	10	4	0	4	2	6
TRINITY_DN89803_c0_g1	1	4	9	3	5	0	6	4	0	4	6	0
TRINITY_DN13416_c3_g2	0	1	3	1	1	1	2	4	0	6	0	9
TRINITY_DN129375_c0_g1	0	1	1	0	0	0	2	4	0	6	6	0
TRINITY_DN49340_c0_g1	1	1	10	3	1	3	14	4	0	7	3	3
TRINITY_DN60278_c0_g1	0	3.998	2	14.994	1.003	2	5	4	0	8	3	4.01
TRINITY_DN34248_c0_g1	0	23	2	5.061	0	5.805	41.02	4	0	9	6	4
TRINITY_DN17456_c0_g1	2	1	0	0	4	9	0	4	0	10	0	0
TRINITY_DN129088_c0_g1	0	0	0	8	7	3	1	4	1	0	6	1
TRINITY_DN47029_c0_g1	1	9	2	1	6	0	4	4	1	1	2	6
TRINITY_DN27345_c2_g1	0	1	6	20	6	3	5	4	1	3	1	17
TRINITY_DN75684_c0_g1	1	5	2	23	22	10	2	4	1	5	5	0
TRINITY_DN11437_c0_g1	40	250	70	29	67	11	14	4	1	6	5	18
TRINITY_DN56566_c0_g1	4	3	19	0	2	0	11	4	1	7	23	7
TRINITY_DN24047_c0_g1	0	0	6	25	1	8	0	4	1	13	0	6
TRINITY_DN15512_c0_g1	1	12.001	2	13	10	26	5	4	1	14	3	10
TRINITY_DN28007_c0_g1	0	42	79	6	4	4	5	4	1	18	9	27
TRINITY_DN17785_c0_g1	3	22	66	22	25	17	10	4	1	56.588	38	16
TRINITY_DN101681_c0_g1	2	0	39.017	0	0	23	6	4	2	0	10	0
TRINITY_DN28637_c1_g1	1	3	0	6	4	5	24	4	2	2	4	5
TRINITY_DN51695_c0_g2	1	2	3	40	28	4	8	4	2	2	15	10
TRINITY_DN6250_c1_g1	27	1	54.073	0	6	2	0	4	2	3	0	0
TRINITY_DN55274_c0_g1	0	0	0	16	29	5	4	4	2	3	1	1
TRINITY_DN231116_c0_g1	4	0	11	0	0	1	1	4	2	3	9	2
TRINITY_DN95061_c0_g1	0	4	3	0	1	0	13	4	2	5	13	4
TRINITY_DN9210_c0_g1	1	8	8	4	10.999	29.999	17	4	2	7	0	6
TRINITY_DN45356_c0_g1	1	2	4	2	0	1	12	4	2	9	13	3
TRINITY_DN51987_c0_g1	7	7	7	1	2	13	6	4	2	11	7	0
TRINITY_DN24034_c0_g1	0	0	2	30	17	15	7	4	2	13	7	6
TRINITY_DN79080_c0_g1	1	0	0	32	1	0	2	4	2	23	0	5
TRINITY_DN81514_c0_g1	9	0	4	7	15	24	5.827	4	2	24	13	2
TRINITY_DN94679_c0_g1	0	1	2	10	3	23	6	4	2.002	3	4	14
TRINITY_DN8681_c0_g1	14.767	10.129	9.182	21.45	16	2	2.132	4	3	1.054	5.158	0
TRINITY_DN27441_c0_g1	0	5	10	1	4	3	2	4	3	3	3	9
TRINITY_DN20632_c0_g1	0	3	3	78	59.999	4	16	4	3	3	4	13
TRINITY_DN5770_c2_g2	0	3	3	10	7.521	2	2	4	3	3	12	4
TRINITY_DN141951_c0_g1	0	0	3	12	2	14	2	4	3	6	4	16
TRINITY_DN44038_c0_g1	0	0	2	5	0	2	6	4	3	9	3	4
TRINITY_DN29196_c0_g1	2	2	8	10	14	101	76	4	3	9	23	21
TRINITY_DN12446_c0_g2	8	0	9	3	5	3	6	4	3	9	34	1
TRINITY_DN36544_c0_g1	6	2	2	2	18	4	13	4	3	12	1	9
TRINITY_DN66470_c0_g1	1	1	8.001	0	6.004	0	1	4	4	0	10	3
TRINITY_DN29156_c1_g1	1	0	6	0	2	3	1	4	4	0	11	3
TRINITY_DN46227_c0_g1	0	16.147	7	2	10	9	5	4	4	0	29.246	1
TRINITY_DN53099_c0_g1	1	0	0	30	20	7	1	4	4	1	2	3
TRINITY_DN38661_c0_g1	1	0	0	37	10	1	6	4	4	1	2	6
TRINITY_DN91569_c0_g2	0	7	0	2	7	9	4	4	4	1	7	3
TRINITY_DN26582_c0_g1	1	4	1	34.001	38	4	8	4	4	2	5	17
TRINITY_DN22826_c0_g1	0	0	0	10	8	0	1	4	4	3	0	1
TRINITY_DN21335_c0_g1	0	3	0	25	8	9	7	4	4	3	5	11
TRINITY_DN235_c1_g1	3	12	4	1	6	6	2	4	4	4	0	25
TRINITY_DN12870_c0_g1	2	5	10.222	0	2	2	2	4	4	4	8	1
TRINITY_DN73372_c0_g1	25	7	0	0	1	11	12	4	4	7	3	7
TRINITY_DN36895_c0_g1	2	14	0	5	4	26.999	17	4	5	1	3	10
TRINITY_DN56562_c0_g1	2	6	17	12	20	13	14	4	5	2	0	3
TRINITY_DN40694_c0_g1	4	0	12.999	8	9	8	7	4	5	3	8	1
TRINITY_DN17568_c1_g1	1	1	6	1	0	2	4	4	5	4	6	3
TRINITY_DN12041_c0_g2	0	119	0	0	88	18	0	4	5	6	0	7
TRINITY_DN32344_c0_g1	0	4	2	1	0	1	2	4	5	7	0	16
TRINITY_DN79278_c0_g1	5	1	10	5	3	0	5	4	5	8	5	7
TRINITY_DN68504_c0_g1	4	106.118	14.01	6	29	4	11	4	5	8	8	4
TRINITY_DN42455_c0_g1	1	2	0	15	0	10.963	4	4	5	10.995	3	1
TRINITY_DN64350_c0_g1	0	2	0	0	2	2	5	4	6	0	0	19
TRINITY_DN21801_c4_g1	2	0	0	0	3	4	11	4	6	1	2	2
TRINITY_DN23720_c0_g1	0	0	24	13	4	0	10	4	6	1	41	5
TRINITY_DN9666_c1_g1	0	2	7	10	4	2	19	4	6	2	3	4
TRINITY_DN43889_c0_g1	0	0	3	15	2	7	4	4	6	3	12	5
TRINITY_DN125953_c0_g1	1	0	11	1	0	4	0	4	6	4	13	1
TRINITY_DN9502_c0_g3	0	6	0	4	0	8	1	4	6	4	17	5
TRINITY_DN11225_c0_g2	0	0	7	3	4	5	12	4	6	4	19	5
TRINITY_DN87696_c0_g1	5	12	9	0	1	9	6	4	6	5	7	3
TRINITY_DN35877_c1_g1	0	1	4	8	4	0	11	4	6	18	6	7
TRINITY_DN19291_c0_g1	9	10	2	1	20	6	10	4	6	22	3	8
TRINITY_DN17787_c0_g1	0	101	122	19	56	8	19	4	6	49	29	53
TRINITY_DN5772_c3_g1	0	2	4	7	2	9	6	4	6.051	2	5	4
TRINITY_DN36345_c0_g1	0	0	0	0	1	1	17	4	7	3	0	8
TRINITY_DN8956_c0_g1	0	3	0	55	146	2	13	4	7	4	3	8
TRINITY_DN8736_c0_g1	3	10.967	0	8	2.248	9	0	4	7	4	7.414	0
TRINITY_DN46349_c0_g1	0	0	0	2	1	7	1	4	7.999	3	9	4
TRINITY_DN41847_c0_g1	7	9	72	2	6	2	2	4	8	0	7	2
TRINITY_DN43747_c0_g2	0	0	2	138	97	4	9	4	8	0	11	16
TRINITY_DN48808_c0_g1	0	3	4	8	9.071	0	0	4	8	1	0	6
TRINITY_DN55407_c0_g1	3	1	3	2	3	12	26	4	8	4	4	15
TRINITY_DN47024_c0_g1	2	5	6	6	2	3	3	4	8	4	5	3
TRINITY_DN64153_c0_g1	0	0	6	0	0	0	1	4	9	2	29	1
TRINITY_DN8624_c1_g1	0	0	10	0	0	0	0	4	9	5	4	2
TRINITY_DN29998_c0_g1	1	6	13.001	2	7	17	37	4	9	5	24.001	7.999
TRINITY_DN134844_c0_g1	1	22	2	2	2	4	5	4	9	7	2	5
TRINITY_DN14865_c0_g1	1	37	204	14	8	2	0	4	9	19	33	11
TRINITY_DN19352_c0_g2	3	0	2	1	1	1	7	4	10	0	0	2
TRINITY_DN68538_c0_g1	5	5	3	0	3	0	13	4	10	10	16	4
TRINITY_DN20306_c0_g1	86	13	23	0	1	1	5	4	10	14	24.001	8
TRINITY_DN33200_c0_g1	11	16	3	7	18	10	6	4	10	17	7	8
TRINITY_DN17517_c0_g1	1	13	0	10	11.999	0	2	4	11	1	8.999	1
TRINITY_DN17683_c0_g2	4	35	11	75	62.999	27	39	4	11.999	18.999	7	23
TRINITY_DN16119_c0_g1	51.999	193	19	2	24	4	14	4	11.999	32	11	76
TRINITY_DN29228_c0_g1	0	0	0	2	1	3	0	4	12	0	25	0
TRINITY_DN31551_c0_g1	0	2	14.001	0	1	2	8	4	12	0	28	7
TRINITY_DN21714_c0_g1	1	5	21	4	2	0	5	4	12	1	0	5
TRINITY_DN46785_c0_g1	3	63	0	9	29	4	14	4	12	2	12	6
TRINITY_DN7494_c0_g1	1	31	3	16	17	144	61	4	12	3	4	13
TRINITY_DN5542_c2_g1	6	6	13.999	0	2	11	16	4	12	10	22	6
TRINITY_DN88330_c0_g1	0	2.82	4	5	16	6.84	7	4	12.568	1	5	3
TRINITY_DN2981_c0_g1	76.623	55.93	16	24	75.999	49.945	26	4	12.637	10	2	29.99
TRINITY_DN210904_c0_g1	10	3	0	1	1	5	3	4	13	2	2	2
TRINITY_DN53214_c0_g1	0	0	6	3	0	0	3	4	13	3	14	10
TRINITY_DN80416_c0_g2	2	5	1	2	1	2	10	4	13	9	10	0
TRINITY_DN63666_c0_g1	1	1	6	0	0	1	2	4	13	12	6	6
TRINITY_DN10305_c0_g1	0	3	0	269	150	11	53	4	14	3	15	42
TRINITY_DN12227_c0_g1	9	14	8	4	8	8	17	4	15	2	6	50.001
TRINITY_DN108680_c0_g1	0	2	23	11	1	4	1	4	15	7	5	19
TRINITY_DN24572_c0_g1	7	38	0	8	32	23	7	4	15	20	9	10.999
TRINITY_DN23280_c0_g5	0	7	2	0	5	0	48	4	15	23	8	0
TRINITY_DN30134_c0_g1	2	0	45	0	1	3	13	4	16	3	13	2
TRINITY_DN3399_c0_g3	6	6	8	0	5	3	9	4	16	8	0	13
TRINITY_DN30518_c0_g1	4	24	30	17.999	0	0	0	4	17	2	153.999	17
TRINITY_DN14497_c0_g1	0	3	11	0	2	12	32	4	17	11	37	21
TRINITY_DN22623_c0_g1	3	238	337.001	10	13	16	14.999	4	18	62	74.989	98.999
TRINITY_DN30669_c0_g1	1	0	15.999	2	0	13	3	4	19	9	7.936	1
TRINITY_DN89995_c0_g1	0	43	3	24	1	3	6	4	19.001	9	16	18
TRINITY_DN31523_c0_g1	0	1	0	5	0	12	3	4	20	12	2	1
TRINITY_DN82369_c0_g1	4	0	19	32.791	17	0	30	4	20.785	10.001	34	15.958
TRINITY_DN15268_c0_g1	0	1	3	73	65	3	30	4	21	2	5	19
TRINITY_DN10293_c0_g1	0	0	3	822	431	2	184	4	21	6	36	95
TRINITY_DN25923_c0_g1	4	0	21	137	148	4	15	4	28	2	31	30
TRINITY_DN6128_c0_g1	0	3	19	233.999	213	5	44	4	30	15.001	6	78
TRINITY_DN563_c0_g1	4	19	12	58	16	23	49	4	30	31	86	61
TRINITY_DN14875_c0_g1	2	17	3	4	4	16.001	12	4	33	23	28	40.999
TRINITY_DN94383_c0_g1	7	3	20	0	2	0	4	4	41	8	9	1
TRINITY_DN433_c0_g1	1	0	2	3880	1369	66	264	4	48	1	76	409
TRINITY_DN3049_c0_g1	0	0	2	2116	1021	0	112	4	48	2	67	226.999
TRINITY_DN29088_c0_g1	0	0	2	0	0	0	9	4	50	6	18	1
TRINITY_DN29770_c0_g1	0	8	0	2	11	5	9	4	60	11	2	0
TRINITY_DN2036_c0_g2	2	43	25	4	5	5	5	4	64	82	159	69
TRINITY_DN2011_c0_g1	107	536	93	49	117	321	106	4	74	52	19	139
TRINITY_DN4237_c0_g1	0	187	133.999	34	873	32	11	4	92	1	6	5
TRINITY_DN3354_c0_g1	34	265	21	51	3	14	66	4	140	98	22	126
TRINITY_DN14937_c0_g1	22.001	22.999	7	7	6	10	8	4	310	15	22.001	34.001
TRINITY_DN53076_c0_g1	2	4	5.948	10	24	11	11	4.002	12	2	11	6.999
TRINITY_DN123977_c0_g1	0	1	0	16	7	17	4.519	4.124	2	17.357	12.671	2
TRINITY_DN2519_c0_g1	1	7	1	4	60.999	7	1	4.214	2	2	3	0
TRINITY_DN13544_c0_g1	3	0	3	7	6	0	2	4.257	0	2	8.852	0
TRINITY_DN7431_c0_g2	0	1.155	5.881	2.344	2.16	1.084	4.716	4.431	13.136	5.858	7.953	2.176
TRINITY_DN20635_c0_g1	0	10	9.813	7.929	0	3	12	4.472	5	15	13.064	5
TRINITY_DN33627_c0_g1	0	0	1	0	1	2	1	4.999	16	2	6	3
TRINITY_DN24803_c0_g5	0	19	0	0	0	0	4	5	0	0	0	6
TRINITY_DN43683_c2_g1	0	0	4	5	0	13	3	5	0	0	0	9
TRINITY_DN12658_c0_g2	0	4.793	15.717	10	0	0	5	5	0	0	2	0
TRINITY_DN28808_c0_g1	3	2	3	2	13	6	0	5	0	0	13	6
TRINITY_DN153539_c0_g1	0	0	0	5	7	7	2	5	0	2	0	0
TRINITY_DN8197_c0_g2	0	2	1	974.081	571.631	1	55	5	0	2	0	90.223
TRINITY_DN54640_c0_g1	3	71.798	8	8	12.993	10	11	5	0	4	15.005	0
TRINITY_DN38889_c0_g1	0	44	6	4	1	1	0	5	0	5	4	1
TRINITY_DN36132_c1_g1	1	3	0	5	6	0	6	5	0	6	1	8
TRINITY_DN5642_c0_g1	1	539	221	0	1	0	2	5	0	34	44	78
TRINITY_DN12543_c0_g1	0	2	4	0	2	0	2	5	0	48	9	16
TRINITY_DN72780_c0_g1	0	0	0	20	0	29	2	5	1	0	0	11
TRINITY_DN22738_c0_g2	0	0	0	8	10	0	4	5	1	2	0	4
TRINITY_DN2278_c0_g2	36	1471.71	708	8	43	6	3	5	1	2	20	24
TRINITY_DN12075_c0_g1	0	11	3	4	7	10	8	5	1	3	3	8
TRINITY_DN104888_c0_g1	1	3	0	0	1	1	0	5	1	8	9	16
TRINITY_DN21393_c0_g1	0	31.001	0	49	11	0	20.999	5	1	10	1	20
TRINITY_DN139712_c0_g1	1	11	1	7	0	8	0	5	1	24	1	5
TRINITY_DN26713_c0_g1	1	2	7	49	16	15	0	5	2	0	3	15
TRINITY_DN40123_c0_g1	1	8	1	11	5	0	4	5	2	1	1	2
TRINITY_DN17091_c0_g3	1	8	0	28	11	5	9	5	2	1	1	8
TRINITY_DN137875_c0_g1	1	11	2	1	1	9	11	5	2	2	1	9
TRINITY_DN7295_c1_g2	1	3	17	1	6	11	4	5	2	2	4	2
TRINITY_DN59747_c0_g1	0	0	14	0	0	0	3	5	2	3	8	1
TRINITY_DN63102_c0_g1	0	12	0	3	1	5.001	0	5	2	4	2	2
TRINITY_DN7315_c0_g2	3	9.999	5	1	32.001	14	1	5	2	4	10	3
TRINITY_DN11911_c0_g1	0	5	12	4	1	1	3	5	2	6	11	7
TRINITY_DN18202_c0_g2	0	103	208	0	2	4	1.999	5	2	41	51	46
TRINITY_DN14245_c0_g1	3	13	0	7	3	4	1	5	2	49	0	10
TRINITY_DN7934_c0_g2	24	10	81	0	2	28	13	5	2	61	132.103	22
TRINITY_DN33474_c0_g1	0	4	6	138	189	4	18	5	3	0	4	23
TRINITY_DN38695_c0_g2	0	0	0	6	7	0	0	5	3	2	2	4
TRINITY_DN65253_c0_g1	1	8.995	1	2	6	7	1	5	3	2	4	0
TRINITY_DN62563_c1_g1	0	7	0	1	0	0	3	5	3	2	8	5
TRINITY_DN57678_c1_g1	0	2	13	16.001	0	2	3	5	3	4	4	0
TRINITY_DN28837_c0_g1	72	9	83	2	5	0	4	5	3	6	15	13
TRINITY_DN14647_c0_g2	2	3	3	133	58	4	27	5	3	8	17	29
TRINITY_DN16363_c0_g1	0	7	10.999	2	1	0	4	5	3	10	24	1
TRINITY_DN19440_c0_g1	0	17	3	2	27	17	3	5	3	12	0	8
TRINITY_DN25303_c0_g1	0	3	0	186	100	0	15	5	4	0	9	33
TRINITY_DN24916_c0_g1	19.002	9	13.992	8	1	7	16	5	4	1	2	20
TRINITY_DN5673_c1_g2	1	2	91.985	15.465	3	1	16	5	4	1	9	6
TRINITY_DN67348_c0_g1	1	3	0	1	0	9	3	5	4	7	2	15
TRINITY_DN10450_c0_g1	0	4	0	80	24	31	33.201	5	4	8	13	16
TRINITY_DN6927_c0_g1	8	4	50.999	37	3	22	13	5	4	37	32	57
TRINITY_DN1680_c2_g1	1	15.001	11	0	9	3	3	5	5	1	4	6.077
TRINITY_DN10206_c0_g1	0	1	1	0	2	8	9	5	5	2	7	6
TRINITY_DN27176_c0_g2	1	2	0	4	13	3	11	5	5	6	4	6
TRINITY_DN96958_c0_g1	5	4	0	7	2	17	5	5	5	7	1	4
TRINITY_DN11308_c0_g1	0	1	2	14	19	9	13	5	5	9	10	19
TRINITY_DN19302_c0_g1	4	48	6	2	12.001	14	15	5	5	10	12	2
TRINITY_DN39060_c1_g2	2	0	2	1	2	2	12	5	5	11	34	2
TRINITY_DN12072_c1_g2	0	1	1	10	3	13	6	5	6	0	7	5
TRINITY_DN39034_c1_g1	0	5	7	4	6	7	2	5	6	2	10	1
TRINITY_DN16262_c1_g1	0	0	10	6	1	1	9	5	6	3	2	1
TRINITY_DN30055_c0_g1	1	7	17	0	0	1	4	5	6	4	2	6
TRINITY_DN21873_c0_g1	1	3	15	9	6	75	26	5	6	6	6	3
TRINITY_DN106237_c0_g1	2	2	4	0	2	13	12	5	6	9	9	1
TRINITY_DN2329_c4_g1	9	52	104	9	15	9	17	5	6	10	28	19.999
TRINITY_DN16168_c0_g1	4	0	3	6	11	1	161.001	5	6	13	2	1
TRINITY_DN18358_c1_g1	0	7.981	0	4	13.26	5	4	5	6.687	1	6	1
TRINITY_DN33440_c0_g1	3	2.996	4	5.978	11.497	15.962	16.896	5	7	0	57.995	6
TRINITY_DN31791_c0_g1	0	3	1	7	10	11	15	5	7	3	21	7
TRINITY_DN53131_c0_g1	0	1	2	3	10	15	3	5	7	5	8	6
TRINITY_DN2404_c1_g2	0	8	4	5	1	2	8	5	7	6	9	0
TRINITY_DN9502_c0_g4	0	5	3	1	1	6	11	5	7	9	9	2
TRINITY_DN46096_c1_g1	0	14	0	3	7	13	12	5	7	11	2	5
TRINITY_DN30745_c0_g1	4	3	4	3	3	2	10	5	7	11	27	1
TRINITY_DN68958_c0_g2	0	2	0	17	3	2	14	5	7	13	23	2
TRINITY_DN13276_c0_g1	0	281	77	174	103	4	22	5	7	131	41	79
TRINITY_DN67194_c0_g1	0	4	5	13	9	4	11	5	8	0	8	2
TRINITY_DN114897_c0_g1	11	37	3	14	4	3	1	5	8	1	8	4
TRINITY_DN15952_c1_g1	0	18	24	62	8	1	3	5	8	6	5	12
TRINITY_DN5959_c0_g2	3	69	15	9	2	10	6	5	8	7	6	10
TRINITY_DN143868_c0_g1	6	10	13	9	13	4	5	5	8	8	17	30
TRINITY_DN32104_c0_g1	4	26	10.001	7	5	32	33	5	8	10	3	21
TRINITY_DN77323_c0_g3	1	7	1	12	4	9	2	5	9	0	4	8
TRINITY_DN32519_c0_g1	2	0	2	24	37	3	11	5	9	2.001	6.999	15
TRINITY_DN32808_c0_g1	0	9	1	0	3	0	3	5	9	3	0	8
TRINITY_DN75303_c1_g1	3	1	3	14	13	12	10	5	9	3	10	7
TRINITY_DN25591_c0_g1	5	4	6	6	4	7	27	5	9	5	5	10
TRINITY_DN1680_c2_g2	0	2	3	0	1	1	0	5	9	6	14	2
TRINITY_DN24345_c0_g2	6	8	21	25	58	24	9	5	11	3	16	11
TRINITY_DN34585_c0_g2	0	14	7	4	5	4	3	5	11	5	4	1
TRINITY_DN64095_c0_g1	1	4	2	3	2	5	16	5	11	7	4	13
TRINITY_DN22547_c0_g1	15.68	33	14	0	2	7	15	5	11	15	33.001	3
TRINITY_DN18573_c0_g1	0	2	16.263	13.787	4	1	10	5	11.452	7	9.045	1
TRINITY_DN72193_c0_g1	1	1	7	2	3	1	2	5	12	9	2	16
TRINITY_DN31573_c1_g2	18	1	27	0	5	8	8	5	13	0	17.999	3
TRINITY_DN21294_c0_g1	0	0	0	793.001	378.001	1	45	5	13	2	35	86
TRINITY_DN9147_c0_g1	2	10	10	5	63.001	13	8	5	13	3	19	2
TRINITY_DN26577_c1_g1	1	8	12	2	4	9	4	5	13	14	10	17
TRINITY_DN1726_c1_g1	8	6	15	0	4	22	4	5	13	14	20	4
TRINITY_DN9484_c0_g1	10	51	20	36	53	82.999	57	5	13	19.999	18	44
TRINITY_DN22241_c0_g1	1	7	4	6	19	8	1	5	14	3	0	0
TRINITY_DN89375_c0_g1	10	2	6	1	118	1	19	5	15	16	16	2
TRINITY_DN39637_c0_g1	0	5	17	0	9	12	7	5	16	7	15	1
TRINITY_DN20798_c1_g1	10	11	16	0	1	12	2	5	16	33	11	5
TRINITY_DN29612_c0_g1	0	25	2	4	22	47	20	5	17	11	6	23
TRINITY_DN14630_c0_g1	0	8	33	0	4	10	13	5	23	21	28	2
TRINITY_DN1303_c2_g2	2	22	4	7	7	20	4	5	24	3	2	10
TRINITY_DN23790_c0_g1	1	4	16	9	15	25	16	5	24	7	23	15
TRINITY_DN48685_c0_g1	15.002	39.054	77.433	25.372	0	47.75	4	5	24.87	12.403	40.228	12
TRINITY_DN29306_c0_g2	7	29	21	34	87	34	3	5	25	10	16	10
TRINITY_DN21493_c0_g1	2	3	5	16.999	20	32	12	5	26	4	3	0
TRINITY_DN39771_c0_g1	4	2	20	2	10	3	2	5	28.999	19	19	20
TRINITY_DN568_c0_g2	282.001	1673	78.001	48.001	130	50	48	5	30	64	53.999	172
TRINITY_DN29989_c0_g1	0	3	3	1	1	9	28	5	31	21	28	7
TRINITY_DN5552_c0_g1	1	0	2	1383	654	3	86	5	34	4	43	192
TRINITY_DN750_c1_g2	12.615	216.299	67.571	10.425	19.643	30.699	36	5	34.201	78.998	35.934	68.898
TRINITY_DN27882_c0_g3	6	9	20	0	83	72	0	5	38	1	2	0
TRINITY_DN69427_c0_g1	0	4	7	0	4	1	7	5	42	4	60.001	5
TRINITY_DN2722_c0_g1	8	66	4	36	72	19	24	5	43	24	14	67
TRINITY_DN17377_c0_g1	1	0	3	9	34	17	28	5	77	20	26.999	13
TRINITY_DN11503_c0_g1	0	8	27	5	8	0	62	5	93	40	9	24
TRINITY_DN13228_c0_g1	14	0	140	30	0	41	3	5	95	81.001	0	0
TRINITY_DN19793_c0_g1	0	0	0	6	0	1	4	5.001	7	0	0	0
TRINITY_DN1056_c0_g1	17	3	104	113	9	5	8	5.006	65	110	229	0
TRINITY_DN2549_c1_g2	15.668	9.458	10.779	13.691	20.45	1.029	12.625	5.049	8.452	8.349	14.862	2.402
TRINITY_DN8511_c0_g1	0	0	0	0	10	1	6.835	5.422	4.999	2.295	4	0
TRINITY_DN5968_c0_g3	9.47	8.161	4.476	1.06	6.716	7.206	6.675	5.599	8.811	9.83	6.772	11.396
TRINITY_DN6667_c0_g3	0	2.93	3.008	0	0	4.51	6.551	5.657	8.366	13.345	0	5.751
TRINITY_DN39975_c0_g2	0	4	28.066	1	3	10.947	7.692	5.915	1	0	1	0
TRINITY_DN34392_c0_g1	0	0	4	24.79	3	11.006	9.011	5.995	2	7	6.993	3
TRINITY_DN8634_c0_g1	0	20.496	4	57.875	55	49	19.002	5.999	6	13.001	25	27
TRINITY_DN92363_c0_g1	0	3	0	1	9	1	1	6	0	0	0	0
TRINITY_DN13879_c0_g1	1	18.999	0	0	28	0	0	6	0	0	0	0
TRINITY_DN42893_c0_g1	0	0	2	0	0	0	7	6	0	0	0	0
TRINITY_DN10125_c0_g1	16	684	135	0	8	0	0	6	0	0	0	1
TRINITY_DN282545_c0_g1	0	2	0	0	0	6	8	6	0	0	0	3
TRINITY_DN17456_c0_g3	2	1	9	1	3	5	2	6	0	0	2	2
TRINITY_DN21694_c0_g1	0	0	0	0	0	4	0	6	0	0	6.213	0
TRINITY_DN25991_c0_g1	1	0	0	6	1	4	1	6	0	0	8	2
TRINITY_DN3280_c0_g1	1	16	368.999	2	7	1	5	6	0	2	0	2
TRINITY_DN23609_c0_g1	3	23	23	12	23.999	18.001	11	6	0	2	3	19.001
TRINITY_DN2329_c1_g1	88.023	50.934	576.354	9	18	26.024	21	6	0	2	6	4.007
TRINITY_DN14835_c0_g1	0	0	12	18	23	1	3	6	0	2	23	18
TRINITY_DN40864_c0_g1	0	0	0	0	3	2	6	6	0	3	1	2
TRINITY_DN62921_c0_g1	0	10	1	0	6	2	0	6	0	3	2	0
TRINITY_DN30480_c0_g1	1	15	2	10	0	70	0	6	0	5	0	0
TRINITY_DN20059_c0_g1	0	0	0	0	0	2.994	7	6	0	5	4.001	5
TRINITY_DN14837_c0_g1	1	0	8	0	27	2	1	6	0	5	10	0
TRINITY_DN18565_c0_g1	6	5.293	7.954	4	3	12	7	6	0	7	4	1
TRINITY_DN75948_c0_g1	0	0	0	2	0	0	0	6	0	10	0	1
TRINITY_DN51093_c0_g1	6	173	37	3	10	3	3	6	0	35.999	7	22.999
TRINITY_DN59325_c0_g2	0	7	0	3	2	9	3	6	1	0	1	8
TRINITY_DN142603_c0_g1	0	2	1	3.432	1	2.426	1	6	1	1	7	2.001
TRINITY_DN12191_c1_g1	0	4	11	2	5	1	0	6	1	2	11	0
TRINITY_DN37798_c0_g1	0	0	1	0	0	0	6	6	1	3	0	1
TRINITY_DN13493_c1_g1	2	9	1	25.001	15	40	27	6	1	4	4	7
TRINITY_DN32025_c0_g1	0	6	3	5	14	10	1	6	1	9	12	5
TRINITY_DN32407_c0_g1	1	2	11	45	12	36.999	2	6	1	11	10	6
TRINITY_DN15660_c0_g1	3	139	169	3	2	6	12	6	1	13	29	33
TRINITY_DN69718_c0_g1	0	12	0	0	0	0	8	6	1.977	2	0	2
TRINITY_DN121453_c0_g2	2	0	2	3	7	3	0	6	2	1	0	2
TRINITY_DN58951_c0_g1	2	2	4	1	4	2	14	6	2	1	1	9
TRINITY_DN64158_c0_g2	1	0	1	0	4	1	6	6	2	2	3	3
TRINITY_DN35815_c0_g1	0	1	7	6	1	3	0	6	2	3	3	1
TRINITY_DN100745_c0_g1	1	12	1	4	7	196	3	6	2	6	4	9
TRINITY_DN20188_c0_g1	2	2	0	25	18.999	6	6	6	2	7	2	14
TRINITY_DN85214_c0_g2	4	8	1	0	2	3	5	6	2	7	9	7
TRINITY_DN9852_c0_g1	0	13	6	29	55	14	3	6	2	12	16	4
TRINITY_DN231920_c0_g1	5	0	11	0	1	2	3	6	3	0	15	1
TRINITY_DN82401_c0_g1	0	0	11	1	4	0	0	6	3	1	2	1
TRINITY_DN67736_c0_g1	8	1	26	0	1	7	16	6	3	1	15	1
TRINITY_DN52318_c0_g1	0	0	0	6	7	3	4	6	3	3	1	2
TRINITY_DN15467_c0_g1	0	0	5	3	1	26	5	6	3	4	0	1
TRINITY_DN94951_c0_g1	0	8	0	3	4	9	3	6	3	4	8	5
TRINITY_DN1777_c5_g1	0	1	1	18	14.008	5	9	6	3	4	10	1
TRINITY_DN42872_c0_g1	0	0	1	20	12	7	11	6	3	6	5	5
TRINITY_DN47899_c0_g1	1	0	2	0	0	5	0	6	3	8	7	0
TRINITY_DN17042_c0_g1	0	10	0	1	4	3	3	6	3	9	4	9
TRINITY_DN32173_c0_g1	3	5	0	4	0	13	5	6	3	9	5	8
TRINITY_DN29335_c0_g1	0	0	0	141	72	7	14	6	3	12	15	19
TRINITY_DN13659_c0_g1	3	7.979	3	9.002	0	14.993	7.188	6	3.988	8	0	63.579
TRINITY_DN141158_c0_g1	4	4	9	3	5	2	28.005	6	4	0	1	1
TRINITY_DN33335_c0_g1	0	0	6	7	4	1	3	6	4	0	1	4
TRINITY_DN210255_c0_g1	0	0	1	2	3	5	8	6	4	0	4	4
TRINITY_DN19429_c2_g1	1	0	13	1	5	8	5	6	4	1	2	9
TRINITY_DN4775_c0_g1	0	2	2	77.999	81	3	2	6	4	2	5	4
TRINITY_DN14836_c0_g5	0	2	2	0	0	0	3	6	4	4	11	5
TRINITY_DN23694_c0_g1	13	5	56	0	27	6	1	6	4	7	0	0
TRINITY_DN10450_c0_g2	0	0	0	45	16	0	4	6	4	7	2	8
TRINITY_DN78959_c0_g1	14	3	5	14	36	5	27	6	4	10	1	10
TRINITY_DN14362_c0_g1	2	62	71	2.001	12	42	24	6	4	14	30	21
TRINITY_DN11614_c3_g1	9	4	2	4	13	5	1	6	4	18	4	10
TRINITY_DN89701_c0_g1	0	1	0	5	9	7	14	6	5	2	13	24
TRINITY_DN10556_c0_g2	3	5	10	11	191	6	29	6	5	3	1	15
TRINITY_DN46634_c0_g1	1	0	7	1	4	9	1	6	5	4	1	0
TRINITY_DN14983_c0_g1	2	1	10	4	1	2	4	6	5	4	1	0
TRINITY_DN44099_c0_g1	0	0	4	0	4	10	7	6	5	6	10	1
TRINITY_DN24185_c0_g1	6	10	4	5	2	18	17	6	5	8	3	5
TRINITY_DN72165_c0_g1	1	1	7	4	22.01	9	9.002	6	5	9	0	10
TRINITY_DN46247_c0_g1	0	5	2	17	2	2	2	6	5	25.999	22.999	4
TRINITY_DN115613_c0_g1	0	0	0	1	1	1	1	6	6	4	6	2
TRINITY_DN17480_c0_g1	2	5	1	10	11	34.999	24.999	6	6	4	6	12
TRINITY_DN23171_c0_g1	0	164	296	6.001	3	4	10	6	6	73.999	53	95
TRINITY_DN240_c0_g3	53	189.577	389	2	102	107.998	19	6	6.005	4	9	6
TRINITY_DN12332_c0_g1	0	8	16	14	14	1	10	6	7	1	4	18
TRINITY_DN15401_c1_g2	0	1	0	0	1	0	1	6	7	1	7	1
TRINITY_DN61165_c0_g1	0	0	0	172	52	0	22	6	7	1	7	5
TRINITY_DN140303_c0_g3	0	0	2	3	1	2	3	6	7	5	11	0
TRINITY_DN86367_c0_g1	0	1	13	22	38	24	23	6	7	13	5	13
TRINITY_DN14132_c0_g1	4	14.005	15.001	1	7	7	7	6	7	26	24	5
TRINITY_DN11641_c0_g1	0	30.999	14	3	2	18	56	6	7	57	26	66
TRINITY_DN39614_c0_g1	0	1	2	6	4	1	0	6	8	0	7	2
TRINITY_DN49920_c0_g1	0	2	1	1	0	9	13	6	8	1	18	5
TRINITY_DN35740_c0_g1	0	0	0	103	16	31	31	6	8	2	5	12
TRINITY_DN34617_c0_g1	0	3	2	16	19	10	22	6	8	2	7	24
TRINITY_DN44842_c0_g3	0	9	2	4	5	18	17	6	8	4	0	23
TRINITY_DN24889_c0_g1	4	13	13	25	22	45	30	6	8	10	9	31
TRINITY_DN71863_c0_g1	0	8	13	3	6.998	5.001	8	6	8	11.998	30.865	8
TRINITY_DN67063_c0_g1	29	11	23	0	0	8	1	6	9	0	24	8
TRINITY_DN9524_c1_g1	1	3	3	7	1	4	5	6	9	3	17	2
TRINITY_DN8271_c0_g1	1	0	0	266	144	3	37	6	9	4	6	26
TRINITY_DN26881_c0_g1	0	5	3	15	6	11	18	6	9	5	8	3
TRINITY_DN9415_c0_g1	0	1	1	1	1	2	3	6	9	5	11	4
TRINITY_DN35220_c0_g1	1	12	25	13	47	38	5	6	9	5	16	11
TRINITY_DN30530_c0_g1	2	9	5.999	4	29	12	16	6	9	8	9	15
TRINITY_DN36303_c0_g1	0	107	62	77	12	5	2	6	9	17	20	35
TRINITY_DN21862_c0_g1	4	141	68	3	2	17	13	6	9	54	25	26
TRINITY_DN3077_c0_g1	2	24	151	313	58	22	10	6	10	11	40	21
TRINITY_DN14773_c0_g1	0	3	1	0	2	1	4	6	11	0	2	0
TRINITY_DN55879_c0_g1	10	9	39	3	21	32	0	6	11	14	1	3
TRINITY_DN25381_c0_g1	0	0	12	20	2	3	9	6	11	17	13	1
TRINITY_DN23561_c0_g1	2	0	3	0	3	2	3	6	12	0	2	2
TRINITY_DN14494_c0_g1	10	6	45	0	0	0	10	6	12	0	56.001	0
TRINITY_DN27674_c1_g1	1	57.023	7	2	14	7	2	6	12	5	10	12
TRINITY_DN8903_c0_g1	17	14	2	5	14	14	14	6	12	13	10	28
TRINITY_DN31235_c0_g1	1	40	20.001	5	19	17	4	6	12	14	3	0
TRINITY_DN13600_c0_g1	1	11	4	7	10	29	16	6	12	23	7	22
TRINITY_DN91884_c0_g1	0	0	0	4	0	3	0	6	13	0	1	0
TRINITY_DN21195_c0_g2	1	9	2	7	1	0	0	6	13	0	7	0
TRINITY_DN33476_c0_g1	0	11	7	1	9	4	2	6	13	11	7	4
TRINITY_DN835_c4_g2	3	1	1	7.001	8	1	9	6	13	19	3	13
TRINITY_DN29630_c0_g1	0	26	28	3	6	24	5	6	13	28	25	26
TRINITY_DN89641_c0_g1	0	1	3	10	3	7	4	6	14	6	4	4
TRINITY_DN11356_c0_g1	3	32.001	15.949	3	13.232	2.988	17.147	6	14.932	5.028	7	14
TRINITY_DN19176_c0_g2	2	2	1	12	17	7	5	6	14.996	7	9	5
TRINITY_DN46924_c0_g1	1	4	2	14	22	2	9	6	16	6	2	3
TRINITY_DN29743_c0_g1	1	3	10	2	5	15	15	6	16	10	10	2
TRINITY_DN103070_c0_g1	7	52	31	1	3	1	8	6	16	13	36	11
TRINITY_DN11401_c0_g1	1	2	13	8	20	0	17	6	17	9	0	3
TRINITY_DN42493_c0_g1	16.999	19	38	6	27	3	9	6	18	8	3	2
TRINITY_DN12953_c0_g2	0	2	2	2	1	0	17	6	18	21	0	35
TRINITY_DN52430_c0_g1	3	10	15	4	4	17	6	6	20	3	3	10
TRINITY_DN19058_c0_g1	0	0	0	307	148	11	35	6	20	5	19	46
TRINITY_DN32374_c0_g1	1	6	5	2	1	5	1	6	20	5	22	17
TRINITY_DN22354_c0_g1	29	53	22	8	19	65	18	6	20	9	26	16
TRINITY_DN3083_c0_g1	0	0	0	73	60	27	18	6	21.999	5	13	38
TRINITY_DN38809_c0_g3	0	0	0	0	0	0	0	6	24	0	0	0
TRINITY_DN35740_c2_g1	0	5	5	213	104	4	18	6	24	8	6	44
TRINITY_DN11187_c0_g1	4	60	19	36.999	154	129.999	31	6	25	19.999	10	10
TRINITY_DN88966_c0_g1	0	0	1	2	0	5	0	6	34	0	50	0
TRINITY_DN1778_c0_g1	15.008	70.423	42.34	17	65.998	27.001	20	6	34.02	34.998	11.124	31
TRINITY_DN14195_c0_g1	1	28	11	45.999	40.999	24	22	6	39	17	22.999	18
TRINITY_DN3362_c0_g1	1188	436	21	351	139	267	467	6	41	125	2	19
TRINITY_DN14315_c0_g1	3	58	3	1	0	2	10	6	43	11	14	20
TRINITY_DN4599_c0_g2	1	1104.14	2	38	7	1254	8	6	688.001	0	5	9
TRINITY_DN6623_c0_g1	0	0	345	66	192	0	119	6.001	1	298.001	0	207
TRINITY_DN44246_c0_g1	0	0	0	10.993	1.936	4	3	6.001	4	2	4	2
TRINITY_DN5377_c0_g1	2	4	3	287.001	176.001	18	108	6.001	24	7	26	113
TRINITY_DN19473_c0_g1	0	2.001	2	3	1	13	0	6.002	24	2	2	0
TRINITY_DN30628_c1_g1	0	0	0	4	2	2	4	6.005	0	6	13	10
TRINITY_DN18231_c1_g1	0	7	3	0	0	0	10	6.051	0	0	6	0
TRINITY_DN13724_c0_g1	8	1	8	7	8	10.983	4	6.089	8	12.182	0	22.606
TRINITY_DN36_c0_g2	1	3.078	8.195	6.204	11.267	13.409	9.134	6.128	2.025	17.087	3.051	13.071
TRINITY_DN27463_c0_g1	1	1	3.961	0	4	2	8	6.227	7	2	3	1
TRINITY_DN11304_c0_g2	1.032	2.085	19.048	8.48	4.121	5.296	7.323	6.324	5.163	6.36	21.208	17.385
TRINITY_DN27601_c0_g2	2	27.161	0	0	0	2	3.924	6.363	40.641	17.541	0	0
TRINITY_DN33104_c0_g1	2.536	4.72	6.349	1.107	4.42	7.012	34	6.4	3.089	0	11.642	9.728
TRINITY_DN23936_c0_g1	0	0	0.979	2	2	5.401	7.729	6.401	6.242	2	10.325	0
TRINITY_DN764_c0_g5	5.634	6.879	7.947	9.767	8.766	3.224	14.428	6.449	11.449	8.742	15.387	6.366
TRINITY_DN6341_c0_g3	3.357	4.007	6.172	1.099	5.586	6.356	7.677	6.619	11.599	1.053	7.859	1.028
TRINITY_DN25137_c0_g1	1	6	15	51	21.987	8	5	6.769	2	6	13.996	2.283
TRINITY_DN2773_c0_g2	9.156	3.249	4.312	0	28.762	7.804	8.729	6.866	12.043	20.1	5.474	5.416
TRINITY_DN36250_c0_g1	1	4	20	37	14	9	14	6.999	14	13	15.956	13
TRINITY_DN20362_c0_g1	2	2	10	1	0	0	0	7	0	0	2	5
TRINITY_DN130291_c0_g1	0	0	0	0	11	0	0	7	0	0	5	3
TRINITY_DN44950_c0_g1	0	8	0	2	0	1	4	7	0	1	2	3
TRINITY_DN155638_c0_g1	3	0	9	0	1	2	1	7	0	1	8	0
TRINITY_DN57614_c1_g1	0	1	1	0	0	0	0	7	0	2	0	17.063
TRINITY_DN27708_c0_g2	1	10	1	1	0	8	16	7	0	2.042	0	7
TRINITY_DN71913_c0_g1	0	4	10	9	9	0	8	7	0	8	9	1
TRINITY_DN35355_c0_g1	1	4	2	4	1	7	9	7	0	11	6	4
TRINITY_DN6006_c0_g2	48	99.322	69	30	42.999	49	88	7	0.999	6	4	11
TRINITY_DN43504_c0_g1	0	9	118	0	32	187	12	7	1	0	6	0
TRINITY_DN21780_c0_g1	0	2.07	5	7	0	2	2	7	1	2	5	4
TRINITY_DN18972_c0_g1	0	3	2	0	3	4	0	7	1	2	10	0
TRINITY_DN24345_c0_g1	0	4	0	31	2	11	2	7	1	6	27	1
TRINITY_DN7795_c0_g2	0	1	1	0	0	2	0	7	1	7	3	4
TRINITY_DN47875_c0_g1	0	1	2	0	3	0	0	7	1	48	7	21
TRINITY_DN38580_c0_g1	0	2	0	10.049	3	0	2.487	7	2	0	3	3.483
TRINITY_DN82764_c0_g1	0	3	3	3	2	2	0	7	2	2	6	2
TRINITY_DN56619_c0_g2	0	13	7	3	4	3	3	7	2	3	13	4
TRINITY_DN103110_c0_g2	1	0	7	13	9	3	13	7	2	6	3	4
TRINITY_DN83280_c0_g1	1	3	0	0	0	0	4	7	2	7	11	3
TRINITY_DN127475_c0_g1	4	7	8	0	1	5	12	7	2	17	7	1
TRINITY_DN61617_c0_g2	0	2	2	1	0	1	2	7	2	47	9	7
TRINITY_DN33855_c0_g1	0	0	3	0	11	6	8	7	3	2	15	5
TRINITY_DN16738_c0_g1	2	5	6	8	4	8	22	7	3	3	2	13
TRINITY_DN17814_c0_g1	2	1	4	0	11	8	1	7	3	3	5	9
TRINITY_DN18158_c0_g1	0	3	2	4	3	43	0	7	3	4	6	1
TRINITY_DN29435_c0_g1	1	5	4	9	3	26	12	7	3	5	7	10
TRINITY_DN12520_c0_g1	1	11.995	9	9	4	2	6.001	7	3	6	12	5
TRINITY_DN9829_c0_g2	4	5	1	80	68	16	13.001	7	3	13	5	45
TRINITY_DN65471_c0_g3	4	32	18	14	40	4	15	7	3	16	17	6
TRINITY_DN29624_c0_g1	15	21	0	5	14	74	29	7	3	32	6	55
TRINITY_DN12657_c0_g1	1	4	2.992	16	5	6	1	7	3.051	3	5	1
TRINITY_DN10219_c0_g1	1	0	0	174	73	2	45	7	4	4	7	21
TRINITY_DN51263_c0_g1	4	5	14	11	4	7	10	7	4	4	9	8
TRINITY_DN23184_c0_g1	1	11	3	0	1	7	10	7	4	6	6	2
TRINITY_DN67248_c0_g1	1	0	3	42	19	9	11	7	4	6.999	15	5
TRINITY_DN83347_c0_g1	0	0	12	0	0	0	0	7	4	16	141	9.999
TRINITY_DN41253_c0_g1	0	5.063	0	0	0	0	10	7	5	0	2	1
TRINITY_DN72877_c0_g1	0	1	0	5	6	2.042	2	7	5	2	1	1
TRINITY_DN19949_c0_g1	1	0	2	38	20	3	14	7	5	3	8	18
TRINITY_DN5551_c1_g2	0	7	8	2	7	9	6	7	5	9	5	9
TRINITY_DN12640_c0_g2	1	6	5	78	61	30	32	7	5	10	37	4
TRINITY_DN54762_c0_g2	4	15	6	36	20	23	30	7	5	12	7	49
TRINITY_DN49596_c0_g2	2	3	3	2	3	5	13	7	5	12	13	11
TRINITY_DN29586_c0_g1	6	15	6	49	70.001	59	64	7	5	17	7.001	20
TRINITY_DN26141_c0_g1	0	2	3	1	2	0	1.792	7	6	0	14.994	3
TRINITY_DN26585_c0_g3	0	0	1	0	4	3	2	7	6	1	3	3
TRINITY_DN5091_c0_g3	3	2	6	4	3	6	73	7	6	3	1	26
TRINITY_DN38069_c0_g1	0	31	4	18	14	13	5	7	6	3	7	0
TRINITY_DN36283_c0_g1	0	7	3	7	3	6	14	7	6	5	6	12
TRINITY_DN44351_c0_g1	1	9	1	29	28.999	22	26.999	7	6	7	7	28
TRINITY_DN76679_c0_g1	0	7	9	2	1	3	5	7	6	10	9	4
TRINITY_DN9186_c0_g1	2	4	17	8	6	8	14	7	6	10.011	9	5
TRINITY_DN48830_c0_g2	0	0	1	1	6	2	14	7	6	13	4	7
TRINITY_DN5262_c0_g2	0	86	421.999	9	20	16	19	7	6	39	48	53
TRINITY_DN13812_c0_g1	1	230	385	3	1	0	1	7	6	66	91	90
TRINITY_DN11408_c0_g2	3	754	504	0	6	9	14	7	6	143	199	151
TRINITY_DN54487_c0_g1	2	1	13	1	5	23	7	7	6.014	13	26	0
TRINITY_DN44094_c0_g2	0	1	4	0	5	3	1	7	7	4	6	3
TRINITY_DN31071_c2_g1	0	0	3	5	3	4	0	7	7	6	11	0
TRINITY_DN14031_c0_g2	1	0	5	4.036	2	5	2	7	7	7	6	6
TRINITY_DN71548_c0_g1	0	7	1	0	2	2	1	7	7	9	4	3
TRINITY_DN5519_c0_g1	11	147.244	48	8	39	11	10	7	7	14	15	6
TRINITY_DN34313_c0_g1	10	7	4	20.999	16	30	26	7	7	19	1	7
TRINITY_DN83490_c0_g1	5	2	3	1	2	5.912	2	7	7.979	3	12	3
TRINITY_DN49289_c0_g1	0	2	0	0	0	4	4	7	8	1	1	3
TRINITY_DN17217_c0_g1	0	6	0	1	11	12	8	7	8	1	13	4
TRINITY_DN28578_c0_g1	3	1	3	3	3	7	17	7	8	3	0	15
TRINITY_DN54973_c0_g1	0	8	5	12	1	3	4	7	8	6	20	4
TRINITY_DN16397_c0_g1	1	0	13	7	4	4	1	7	8	11	14	2
TRINITY_DN11223_c0_g1	0	3	5	15	13.872	20	12	7	9	3	6	6
TRINITY_DN22291_c0_g1	0	1	0	126	97	4	15	7	9	6	5	29
TRINITY_DN14443_c0_g1	1	9	32.735	4	25	6	15	7	9	9	41.997	8
TRINITY_DN24604_c0_g1	0	1	13	1	2	3	10	7	9	18	2	5
TRINITY_DN73375_c0_g1	0	10	4	12	8	1	6	7	10	2	7	5
TRINITY_DN27343_c0_g1	2	5	5	0	5	3	2	7	10	3	17	1
TRINITY_DN26910_c0_g2	2	26	15	3	3	4	2	7	10	5	12	5
TRINITY_DN2608_c1_g1	5	12	1	47	24.999	4	7	7	10	23	5	10
TRINITY_DN8239_c0_g1	79	151.001	121	65	252	62.002	56	7	10	31	26.016	11
TRINITY_DN16885_c0_g1	14	5	2	9	22	210.991	30	7	10	45	10	68
TRINITY_DN89611_c0_g1	3	228	201	0	3	9	13	7	10	48	78	63
TRINITY_DN60724_c0_g1	2	2	3	8	17	4	16	7	11	1	8	4
TRINITY_DN19811_c2_g1	0	2	0	11	16	13	4	7	11	5	12	6
TRINITY_DN82863_c0_g2	0	5	6	35	13	2	7	7	11	12	17	17
TRINITY_DN949_c0_g2	0	2	14	9	9	36.999	8	7	11	37.466	32.206	1
TRINITY_DN20862_c0_g1	0	1	2	7	13	13	2	7	12	5	12	2
TRINITY_DN81277_c0_g2	1	5	7	21	15	21	49	7	12	12	22	17
TRINITY_DN40916_c0_g1	5	20.337	9.446	3.019	11	4	1	7	12.264	2	15	3
TRINITY_DN6446_c0_g1	0	0	0	3	0	4	0	7	14	0	47.999	4
TRINITY_DN6708_c0_g1	15	168.186	67	7	37	17.999	10	7	14	5	20	7
TRINITY_DN28979_c0_g2	2	0	1	1	1	3	5	7	14	6	7	6
TRINITY_DN17524_c0_g1	12	6	4	5	9	11	14.001	7	14	24	5	4
TRINITY_DN17100_c0_g1	0	10	4	13	10	47	27	7	15	7	0	23
TRINITY_DN3083_c2_g1	0	1	4	12	21	10	11.806	7	15	7	10	5.999
TRINITY_DN14253_c0_g1	7.016	3	7	2	9	20	3	7	15	8	0	4
TRINITY_DN50300_c0_g1	0	11	9	18	39	8.049	7	7	15	12	12.999	17
TRINITY_DN119754_c0_g1	0	15	13	9	13	17	6	7	16	24	16	5
TRINITY_DN8353_c1_g1	1	29	0	61	17	13	26	7	17	10	3	26
TRINITY_DN141650_c0_g1	1	17	7	14	9	10	12	7	17	13	24	6
TRINITY_DN11243_c0_g1	0	0	3	298.001	150.001	4	50	7	18.999	8	17	60.999
TRINITY_DN104667_c0_g1	6	9	24	3	10	4	22	7	19.011	3	37	2
TRINITY_DN86329_c0_g1	0	105	5	7	2	10	4	7	20.001	11	21	34
TRINITY_DN70671_c0_g1	3	4	2	24	28	42	18	7	21	21	11	25
TRINITY_DN24895_c0_g1	2	6	8	0	38.001	4	12	7	25	24	10	32
TRINITY_DN18189_c1_g1	1	7	36.001	7	29.117	10	16.001	7	26	13	31.999	6
TRINITY_DN44753_c0_g1	3	3	16	9	12	11	10	7	26	26	27.999	19
TRINITY_DN14206_c0_g1	12	14	101	59.001	25	61	79	7	29	8	18	2
TRINITY_DN14897_c1_g1	4	34	49	8	14	14	10	7	35	74	34	13
TRINITY_DN7070_c0_g1	0	0	1	2544	1071	13	107	7	47	5	70	299
TRINITY_DN18926_c0_g1	3	9	0	15	0	92	87.999	7	64.999	0	39	11
TRINITY_DN22615_c0_g1	3	19	11	37	67	138	483	7	67	30	44	29
TRINITY_DN2813_c0_g1	0	29.946	0	1	6	2	3	7	119	28	319.078	47.001
TRINITY_DN88429_c0_g1	0.997	0	0	4	9.002	1	0	7.002	1	0	1.042	2
TRINITY_DN100982_c0_g1	2.116	5.707	54.512	3.001	18.025	31.999	14.232	7.004	5	0	20.454	0
TRINITY_DN27243_c0_g2	0	1	0	106.008	29.196	0	0	7.185	0	7.251	28	0.911
TRINITY_DN75581_c0_g1	4	9.001	3.279	26.002	44	3.046	0.89	7.185	4.315	24	44	1
TRINITY_DN29090_c0_g1	10	10.328	13.191	5.165	14.746	5.16	18.803	7.279	20.997	8	0	15.925
TRINITY_DN1530_c3_g1	5	5	11	6	6	2	3	7.407	8.355	2	10	6
TRINITY_DN10738_c0_g1	0	5.474	7.211	1	14	4.111	0	7.421	2.858	0	5.982	0
TRINITY_DN31130_c0_g1	1	10.915	1	0	7.121	1	8	7.615	0	3	1	1
TRINITY_DN47192_c0_g1	0	20	10	19.093	14.001	6	8.996	7.724	5	8	8	19
TRINITY_DN35353_c0_g1	1	18.161	12	2	2	4	2	7.872	10	5	4	0
TRINITY_DN3564_c0_g1	2.066	2.345	11.186	7.793	7.97	5.374	4.724	7.924	10.055	4.192	32.258	3.098
TRINITY_DN2458_c0_g2	37.656	11.471	10.229	2.265	6.917	13.381	6.785	7.988	12.1	18.672	15.053	5.672
TRINITY_DN55479_c0_g1	0	0	1	1	0	0	0	7.996	0	0	3	5.804
TRINITY_DN77196_c0_g3	2	13	9	1	8	1	7	7.999	1	2	5	1
TRINITY_DN28593_c0_g1	0	6	0	0	0	0	0	8	0	0	1	5
TRINITY_DN7790_c0_g2	1	1	4	0	0	0	0	8	0	0	7	4
TRINITY_DN39538_c0_g1	2.001	2	3.074	1	2.025	9	4	8	0	1	6.326	1
TRINITY_DN57921_c0_g1	0	0	0	33	21	1	3	8	0	2	0	2
TRINITY_DN7866_c3_g1	0	0	16	6	12	0	1	8	0	3	0	1
TRINITY_DN27539_c0_g1	5	0	10	0	0	2	3	8	0	4	1	3
TRINITY_DN44094_c0_g1	3	5	8.672	4	4	17	6	8	0	8.942	7	10
TRINITY_DN16831_c0_g1	0	0	0	0	0	27	8	8	0	9	0	7
TRINITY_DN35075_c0_g1	0	0	12.999	0	0	0	2.999	8	0	22	22	0
TRINITY_DN14017_c0_g1	1	3	2	2	667	3	6	8	1	1	1	1
TRINITY_DN2195_c1_g2	0	0	0	5	16	0	0	8	1	3	1	1
TRINITY_DN75846_c0_g1	0	2	2	7	3	6	0	8	1	4	8	1
TRINITY_DN10590_c3_g1	0	4	0	8	1	3	2	8	1	6	24	5
TRINITY_DN128569_c0_g1	0	27	3	3	13	0	3	8	1	8	8	9
TRINITY_DN17407_c0_g2	0	2	2	7	8	5	13	8	1	9	0	0
TRINITY_DN18984_c0_g1	0	3	10.678	4	1	19	25	8	1	13	4	20.977
TRINITY_DN13906_c0_g1	0	15	35	61	1	6	11	8	1	14	10	28
TRINITY_DN84219_c0_g1	0	0	0	5	29	8	11	8	2	0	2	1
TRINITY_DN55063_c0_g1	0	6	0	19	1	6	176.999	8	2	2	0	3
TRINITY_DN20023_c0_g2	0	12	17	0	4	2	2	8	2	3	6	4
TRINITY_DN8095_c1_g2	13	10	33	19	29	9	9	8	2	4	6	0
TRINITY_DN53204_c0_g1	0	20	7.996	7	8	0	4.173	8	2	5	2	0
TRINITY_DN31673_c0_g1	3	20	3	3	2	3	10	8	3	0	8	9
TRINITY_DN31230_c0_g1	0	2	5	7	3	14	38	8	3	5	4	14
TRINITY_DN29119_c0_g2	1	2	6	2	8	4.986	9	8	3	5	6	8
TRINITY_DN20832_c0_g1	2	3	7	0	18	11	7	8	3	8	12	5
TRINITY_DN129042_c0_g1	1	8	0	0	5	28	23	8	3	68	17	5
TRINITY_DN73835_c0_g1	0	309	228	2	6	16	9	8	3	88	52	73
TRINITY_DN68691_c0_g1	3	2	8.043	2	2	1	10	8	4	0	4	0
TRINITY_DN51487_c0_g2	0	6	40.955	0	4	0	2	8	4	0	4	4
TRINITY_DN5947_c0_g2	11	6	7	5	12	16	19	8	4	0	6	8
TRINITY_DN38113_c0_g1	4	9	6	5	4	2	11	8	4	6	30.001	0
TRINITY_DN9525_c0_g2	1	4	1	1	7	8	8	8	4	7	6	22.001
TRINITY_DN8792_c1_g2	0	5	2	0	4	2	5	8	4	8	2	5
TRINITY_DN21611_c0_g4	1	9	10	6	5	3	4	8	4	13	26	2
TRINITY_DN3095_c2_g1	11.961	41	3	4	15	17	48.001	8	4	18.958	6	9
TRINITY_DN51745_c0_g1	1	30	68	0	3	20	13	8	4	23	22	19
TRINITY_DN88403_c0_g2	0	0	6	0	13	5	8	8	5	0	0	4
TRINITY_DN48202_c0_g3	0	11	0	6	0	2	1	8	5	4	0	3
TRINITY_DN18951_c0_g1	0	1	1	0	2	34	0	8	5	5	8	4
TRINITY_DN49845_c0_g2	0	9	1	3	52	6	6	8	5	6	6	5
TRINITY_DN140068_c0_g1	1	22	9	35.001	8	4	15	8	5	7	4	4
TRINITY_DN16817_c0_g1	3	32	2	24	17	19	14	8	5	9	12	18
TRINITY_DN42619_c0_g1	0	9	13	6	5	5	7	8	5	10	10	2
TRINITY_DN246_c0_g2	4851	133	8000	255	591	468	46	8	5	15	5	2
TRINITY_DN6206_c0_g2	1	5	4	8	2	1	5	8	5	20	6	3
TRINITY_DN10709_c0_g1	1	4	3	5	7	17	9	8	6	2	6	5
TRINITY_DN24736_c1_g1	3	3	1	4	10	4	8	8	6	3	1	4
TRINITY_DN5105_c0_g1	2	9	7	1	3	1	4	8	6	15	7	10
TRINITY_DN58975_c0_g1	2	5	3	0	10	6	6	8	6	16	24	11
TRINITY_DN15682_c1_g1	2	2	1	2	10	1	4	8	7	1	3	2
TRINITY_DN15059_c0_g1	1	0	1	2	1	5	16	8	7	5	5	6
TRINITY_DN5116_c1_g2	4	4	7	19	23	6	6	8	7	8	14	5
TRINITY_DN22762_c0_g1	0	2	11	1	1	5.998	4	8	7	10	18.464	6
TRINITY_DN85931_c0_g1	0	1	4	0	2	3	7	8	8	1	6	3
TRINITY_DN28986_c0_g1	0	3	1	0	9	10	2	8	8	3	16	45.999
TRINITY_DN24424_c0_g1	0	4	3	2	6	3	2	8	8	6	11	13
TRINITY_DN8319_c0_g2	0	5	0	4	12	20	6	8	8	7	1	3
TRINITY_DN14207_c0_g1	5	2	6	1	5	9	6	8	8.001	10	13	6
TRINITY_DN23209_c0_g1	0	9	4	14	21	13	9	8	9	7	16.001	3
TRINITY_DN41736_c0_g1	2	49	51	37.999	18	5	4	8	9	24	9	23
TRINITY_DN6624_c0_g1	0	375	824	4	12	8	33	8	9	137	298	284.001
TRINITY_DN10381_c0_g1	7	21.999	60.001	9	252	211	113.001	8	9.999	56	5	2
TRINITY_DN30392_c0_g1	1	3	1	5	7	3	5	8	10	3	5	3
TRINITY_DN24677_c0_g1	7	4	8	2	1	4	11	8	10	4	10	2
TRINITY_DN15403_c0_g3	0	4	0	23	0	4	5	8	10	11	68	3
TRINITY_DN26306_c0_g1	4	119	2	43	40	228.001	6	8	10	13	2	1
TRINITY_DN24978_c0_g1	3	13	1	6	7	22	29	8	10	14	1	29
TRINITY_DN10624_c0_g3	13	11	26	26	37	9	26	8	11	7	4	9
TRINITY_DN24481_c0_g1	6	24	23	10	64	15	2	8	11	8	29	2
TRINITY_DN12640_c1_g1	0	2	1	10	22	11	4	8	11.992	1	7.005	5
TRINITY_DN100260_c0_g1	2	1	4	1	1	1	0	8	12	0	1	3
TRINITY_DN60586_c0_g1	0	0	4	3	5	2	14	8	12	2	2	3
TRINITY_DN48681_c0_g1	2	4	24	0	2	4	6	8	12	3	8	3
TRINITY_DN19582_c0_g2	3	11	7	13	36.999	8	1	8	12	4	3	9
TRINITY_DN25637_c0_g1	0	5	2	19	11	21	15	8	12	12	8	12
TRINITY_DN25788_c0_g1	0	2	1	425	192	10	35	8	13	9	22	24
TRINITY_DN16465_c0_g1	2	11	6	29	11	10	10	8	13	12	13	3
TRINITY_DN15268_c0_g2	1	22	6	8	30.999	5	6	8	13	12	15	6
TRINITY_DN18045_c0_g1	6	28	3	13	40	30.001	12	8	13	14	9	11
TRINITY_DN18530_c0_g1	4.002	26.302	27.992	13.994	10	5	17	8	13	21	15.115	4
TRINITY_DN59287_c0_g1	0	3	0	11	0	0	0	8	14	0	8	0
TRINITY_DN49131_c0_g1	3	111	77	9	23	54	25	8	14	24	17	22
TRINITY_DN19408_c0_g1	3	3	7	3	8	10	9	8	15	21	13	7
TRINITY_DN10282_c0_g1	49	0	26.001	0	0	0	1	8	16.977	6	10	2
TRINITY_DN10_c3_g1	2	11	12	9	4	3	4	8	17	8	13	7
TRINITY_DN72389_c0_g1	4	9	45	9	11	11	0	8	17	8	14	6
TRINITY_DN23149_c0_g1	1	3	0	4	19	24	15	8	17	11	14	12
TRINITY_DN15083_c0_g1	10	209	16	10	19	10	9	8	17	80	9	22
TRINITY_DN33696_c0_g1	0	0	0	2	0	1	2	8	18	4	4	0
TRINITY_DN34596_c0_g1	2	4	49	5	3	3	19	8	18	6	23	12
TRINITY_DN4128_c1_g1	4	30	20	6	6	10	31	8	19	28	11	36
TRINITY_DN29926_c0_g1	0	3	8	0	7	6.059	14.01	8	19.999	8.049	11.999	9
TRINITY_DN12131_c1_g1	0	4	7	26	16	7	8	8	20	7	5	9
TRINITY_DN13966_c0_g1	0	1	4	14	14	31	45	8	20	9	4	44
TRINITY_DN10131_c0_g1	0	4	1	0	3	0	10	8	20	14	17	10
TRINITY_DN27274_c0_g1	2	6	2.313	3	3	29.427	65.059	8	20.405	11	1	8.046
TRINITY_DN89801_c0_g1	1	10	2	1	2	0	2	8	21	2	9	2
TRINITY_DN40353_c0_g1	0	2	7	2	11	9	10	8	22	6	4	1
TRINITY_DN4395_c0_g1	2	8	6	14	79.997	19.199	10.999	8	23.997	1	8	1
TRINITY_DN35212_c0_g1	1	4	18	1	0	16	18	8	24	19	41.001	9
TRINITY_DN12638_c0_g1	0	23	0	288	106	10	58	8	25	5	17	27
TRINITY_DN26060_c0_g1	2	40	28	4	30	39	16	8	26	19	14	47
TRINITY_DN68714_c0_g1	2	3	30	11	6	6	22	8	27	24	103	9
TRINITY_DN20630_c0_g1	3	13	50	29	21	27	58	8	29	29.001	83	28
TRINITY_DN15269_c0_g1	12	26	111.001	0	3	50	152	8	34	62	151	45
TRINITY_DN6777_c0_g1	18	10	22	1842	892	17	68	8	38	11	90	204
TRINITY_DN1055_c1_g1	13	52	24	2	17.001	75	30	8	39	18.999	18	8
TRINITY_DN48980_c1_g1	10	31	41.021	8	32	48	2.449	8	44	19.887	29	14
TRINITY_DN49835_c0_g1	0	1	7	13.698	16	38.95	22	8	44.92	12	17.001	23.114
TRINITY_DN17368_c0_g1	0	0	34	1	8	7	42	8	52	23	51	3
TRINITY_DN26845_c0_g1	0	11.999	10	5	9	4	10	8	59.999	6	10	8
TRINITY_DN11036_c0_g1	0	17	0	3	3	7	0	8	62.71	15	37	6
TRINITY_DN5948_c0_g1	35.001	194	33	4	6	44	40.001	8	67	22	254.999	3
TRINITY_DN12833_c0_g1	3	70	425.001	93	8	41.001	12	8	82	19	25	4
TRINITY_DN30534_c0_g1	6	23	56	17	25	11	215.001	8	107	9	77	28
TRINITY_DN1802_c0_g2	14	108.262	37	220.416	134.672	30.078	50.392	8	123.348	53.263	27.045	95.09
TRINITY_DN23132_c0_g1	2	2	4	1	2	4	5	8.001	4	4	9	1
TRINITY_DN21366_c0_g1	1	0	17	713.079	179.402	357.144	365.67	8.001	103.859	1.893	237.756	109.174
TRINITY_DN11488_c1_g2	1	0	19	0	1	1	4	8.012	16	3	30	0
TRINITY_DN39975_c0_g1	2	1	63.934	2	6	26.053	18.308	8.085	7.001	17.999	4	9
TRINITY_DN25087_c0_g1	2	15	0	24.923	17.627	39.109	57	8.148	1.953	30.013	3	11.992
TRINITY_DN66485_c0_g1	0	8.097	4	3.271	3	5.998	4.89	8.216	2.039	0	3	1
TRINITY_DN23330_c0_g1	0	6.078	19.996	2.192	1	0	4	8.251	7.473	0.985	7	0
TRINITY_DN17036_c0_g1	1	16	42.037	2	1	17.26	20.485	8.283	12.759	22.841	84.058	6
TRINITY_DN4162_c0_g2	8.296	5.218	8.592	5.223	8.389	5.414	15.61	8.568	12.042	15.051	13.766	18.843
TRINITY_DN45677_c0_g1	0	0	8	2.992	0	1.979	14.001	8.967	13	8.001	0	13.605
TRINITY_DN93031_c0_g2	3	6	6	5	5	0	4	8.999	4.001	4	8	6
TRINITY_DN8569_c2_g1	0	8	0	0	3	2	6	9	0	0	0	10
TRINITY_DN25590_c0_g1	0	0	7	4	7	0	0	9	0	0	0	11
TRINITY_DN46270_c0_g1	0	5.969	7.952	0	5	0	0	9	0	0	3.115	6
TRINITY_DN18632_c0_g1	2	1	5	17	0	2	197	9	0	0	28	0
TRINITY_DN35340_c0_g3	9	0	0	0	0	0	0	9	0	0	44	0
TRINITY_DN157765_c0_g1	0	1	3	3	11	6	11	9	0	1	10	2
TRINITY_DN24172_c0_g1	1	3	7	1	3	10	3	9	0	1	10	8
TRINITY_DN8890_c0_g1	0	37.999	22	26	70	5	1	9	0	2	2	1
TRINITY_DN11146_c0_g1	0	0	1	24	7	16	10	9	0	6	27	0
TRINITY_DN13083_c0_g1	2	6	7	8	5	8	16	9	0	9	7	22.998
TRINITY_DN35877_c0_g1	0	34	5	0	8	20.999	9	9	0	12	45	24
TRINITY_DN33624_c0_g2	0	0	7	0	2	14	0	9	1	0	0	0
TRINITY_DN10273_c0_g1	3	21	23	2	12	14	11	9	1	0	12	2
TRINITY_DN13690_c1_g1	4	5	1.982	0	9	20	0	9	1	2.822	4	1
TRINITY_DN4434_c0_g1	10	158	98	490.999	113	75	4	9	1	70	54	20
TRINITY_DN16139_c0_g1	4	0	21	1	0	28	17	9	2	0	37	41
TRINITY_DN2235_c0_g1	0	0	1	669.002	936	1	60	9	2	1	12	86.001
TRINITY_DN47429_c0_g1	0	3	0	1	0	2	6	9	2	2	1	1
TRINITY_DN57817_c0_g1	1	1	12	3	1	2	9	9	2	3	13	2
[truncated: 10,563 more rows]
