# Supplementary material for: Stemness Activity Underlying Whole Brain Regeneration in a Basal Chordate
Source: Cells. 2022 Nov 22;11(23):3727. doi: 10.3390/cells11233727 (PMC9738451; doi:10.3390/cells11233727)
Supplement: Supplementary file 1 [file cells-11-03727-s001.zip › Supplementary Table 2_binary.xlsx]

## Sheet: DESeq_binary
GeneID	day0	day2	day7	day14	day21	gene	Protein names	Gene name	#2nd gene name	#3 gene name
TRINITY_DN1001_c0_g2	0	0	0	0	0	Q0P5D3	G1/S-specific cyclin-D2	Ccnd2	Cyl-2
TRINITY_DN10013_c0_g1	0	0	0	0	0	Q503L9	Nucleoredoxin (EC 1.8.1.8) (Protein Red-1)	Nxn	Gn25
TRINITY_DN100155_c0_g1	0	0	0	0	0	Q61361	#N/A	#N/A
TRINITY_DN10020_c0_g1	0	0	0	0	0	Q8TCU6	Phosphatidylinositol 3,4,5-trisphosphate-dependent Rac exchanger 1 protein (P-Rex1) (PtdIns(3,4,5)-dependent Rac exchanger 1)	Prex1	Kiaa1415
TRINITY_DN10029_c0_g1	0	0	0	0	0	P85838	Ferritin heavy chain (Ferritin H subunit) (EC 1.16.3.1) [Cleaved into: Ferritin heavy chain, N-terminally processed]	Fth1	Fth
TRINITY_DN10068_c0_g1	0	0	0	0	0	Q64459	Cytochrome P450 3A11 (EC 1.14.14.1) (CYPIIIA11) (Cytochrome P-450IIIAM1) (Cytochrome P-450UT)	Cyp3a11	Cyp3a-11
TRINITY_DN10088_c0_g1	0	0	0	0	0	Q9ESJ1	CDK5 and ABL1 enzyme substrate 1 (Interactor with CDK3 1) (Ik3-1)	Cables1	Cables
TRINITY_DN1014_c0_g1	0	0	0	0	0	Q8BVQ5	Protein phosphatase methylesterase 1 (PME-1) (EC 3.1.1.89)	Ppme1	Pme1
TRINITY_DN10140_c0_g1	0	0	0	0	0	Q9H5L6	#N/A	#N/A
TRINITY_DN10150_c0_g1	0	0	0	0	0	Q3BAI2	#N/A	#N/A
TRINITY_DN10029_c1_g1	0	0	0	0	0	Q8C9E8	Calcium homeostasis modulator protein 6 (Protein FAM26F)	Calhm6	Fam26f
TRINITY_DN10053_c1_g1	0	0	0	0	0	Q96F24	#N/A	#N/A
TRINITY_DN10060_c0_g1	0	0	0	0	0	Q7SZK7	Oral-facial-digital syndrome 1 protein homolog	Ofd1
TRINITY_DN1018_c0_g1	0	0	0	0	0	P62997	Transformer-2 protein homolog beta (TRA-2 beta) (TRA2-beta) (Silica-induced gene 41 protein) (SIG-41) (Splicing factor, arginine/serine-rich 10) (Transformer-2 protein homolog B)	Tra2b	Sfrs10	Silg41
TRINITY_DN10183_c0_g1	0	0	0	0	0	Q32L97	#N/A	#N/A
TRINITY_DN101905_c0_g1	0	0	0	0	0	A8WVD0	Syntaxin-1B	Stx1b	Stx1b1	Stx1b2
TRINITY_DN10201_c8_g1	0	0	0	0	0	O75896	Tumor suppressor candidate 2 (Fusion 1 protein) (Fus-1 protein) (PDGFA-associated protein 2)	Tusc2	Fus1	Lgcc	Pdap2
TRINITY_DN10228_c0_g1	0	0	0	0	0	Q11126	Alpha-(1,3)-fucosyltransferase 7 (EC 2.4.1.-) (Fucosyltransferase 7) (Fucosyltransferase VII) (Fuc-TVII) (FucT-VII) (Galactoside 3-L-fucosyltransferase)	Fut7
TRINITY_DN10234_c0_g2	0	0	0	0	0	Q7M3K2	#N/A	#N/A
TRINITY_DN102348_c0_g1	0	0	0	0	0	Q8NHH9	#N/A	#N/A
TRINITY_DN10076_c0_g1	0	0	0	0	0	A2AVA0	Sushi, von Willebrand factor type A, EGF and pentraxin domain-containing protein 1 (Polydom)	Svep1
TRINITY_DN10076_c0_g2	0	0	0	0	0	Q96PZ7	Coagulation factor XIII B chain (Protein-glutamine gamma-glutamyltransferase B chain) (Transglutaminase B chain)	F13b	Cf13b
TRINITY_DN100784_c0_g1	0	0	0	0	0	Q9WU63	Heme-binding protein 2 (Protein SOUL)	Hebp2	Soul
TRINITY_DN10062_c0_g1	0	0	0	0	0	Q8C784	Modulator of smoothened protein (Attenuator of hedgehog)	Mosmo	Atthog
TRINITY_DN10277_c0_g1	0	0	0	0	0	P49263	#N/A	#N/A
TRINITY_DN102845_c0_g1	0	0	0	0	0	P28568	Solute carrier family 2, facilitated glucose transporter member 1 (Glucose transporter type 1, erythrocyte/brain) (GLUT-1) (GT1)	Slc2a1	Glut1
TRINITY_DN10285_c1_g1	0	0	0	0	0	Q6PA06	Atlastin-2 (EC 3.6.5.-) (ADP-ribosylation factor-like protein 6-interacting protein 2) (ARL-6-interacting protein 2) (Aip-2)	Atl2	Arl6ip2
TRINITY_DN1029_c0_g1	0	0	0	0	0	Q2KJ96	ADP-ribosylation factor-like protein 5B (ADP-ribosylation factor-like protein 8)	Arl5b	Arl8
TRINITY_DN103557_c0_g1	0	0	0	0	0	Q9VC57	#N/A	#N/A
TRINITY_DN10358_c0_g1	0	0	0	0	0	P53042	Serine/threonine-protein phosphatase 5 (PP5) (EC 3.1.3.16) (Protein phosphatase T) (PPT)	Ppp5c
TRINITY_DN10358_c1_g1	0	0	0	0	0	O95922	Probable tubulin polyglutamylase TTLL1 (EC 6.-.-.-) (Tubulin polyglutamylase complex subunit 3) (PGs3) (Tubulin--tyrosine ligase-like protein 1) (p49)	Ttll1
TRINITY_DN1036_c0_g1	0	0	0	0	0	O60551	Glycylpeptide N-tetradecanoyltransferase 2 (EC 2.3.1.97) (Myristoyl-CoA:protein N-myristoyltransferase 2) (NMT 2) (Peptide N-myristoyltransferase 2) (Type II N-myristoyltransferase)	Nmt2
TRINITY_DN10360_c0_g1	0	0	0	0	0	Q9WV72	Ankyrin repeat and SOCS box protein 3 (ASB-3)	Asb3
TRINITY_DN10297_c0_g2	0	0	0	0	0	P31646	Sodium- and chloride-dependent betaine transporter (Na(+)/Cl(-) betaine/GABA transporter) (Sodium- and chloride-dependent GABA transporter 2) (GAT-2) (Solute carrier family 6 member 12)	Slc6a12	Gabt2	Gat-2	Gat2
TRINITY_DN103030_c0_g1	0	0	0	0	0	Q60754	Macrophage receptor MARCO (Macrophage receptor with collagenous structure)	Marco
TRINITY_DN10304_c0_g1	0	0	0	0	0	Q68FG0	Zinc finger C4H2 domain-containing protein (Hepatocellular carcinoma-associated antigen 127 homolog)	Zc4h2	Hca127	Kiaa1166
TRINITY_DN103110_c0_g2	0	0	0	0	0	Q6R2W3	General transcription factor II-I repeat domain-containing protein 2 (GTF2I repeat domain-containing protein 2) (Transcription factor GTF2IRD2)	Gtf2ird2
TRINITY_DN1005_c0_g1	0	0	0	0	0	Q29RK9	MOB kinase activator 3A (Mob1 homolog 2A) (Mps one binder kinase activator-like 2A)	Mob3a	Mobkl2a
TRINITY_DN10034_c0_g1	0	0	0	0	0	Q1LVQ2	SH3 domain-binding protein 4	Sh3bp4
TRINITY_DN100260_c0_g1	0	0	0	0	0	P82251	Y+L amino acid transporter 2 (Solute carrier family 7 member 6) (y(+)L-type amino acid transporter 2) (Y+LAT2) (y+LAT-2)	Slc7a6	Kiaa0245
TRINITY_DN10319_c0_g1	0	0	0	0	0	P53762	Aryl hydrocarbon receptor nuclear translocator (ARNT protein) (Dioxin receptor, nuclear translocator) (Hypoxia-inducible factor 1-beta) (HIF-1-beta) (HIF1-beta)	Arnt
TRINITY_DN10326_c0_g1	0	0	0	0	0	Q8AYS7	Centromere protein I (CENP-I) (FSH primary response protein 1) (Follicle-stimulating hormone primary response protein)	Cenpi	Fshprh1
TRINITY_DN10329_c0_g1	0	0	0	0	0	Q96NL6	Sodium channel and clathrin linker 1 (Sodium channel-associated protein 1)	Sclt1	Sap1
TRINITY_DN1033_c3_g1	0	0	0	0	0	Q28H54	Choline/ethanolaminephosphotransferase 1 (mCEPT1) (EC 2.7.8.1) (EC 2.7.8.2)	Cept1
TRINITY_DN103366_c0_g1	0	0	0	0	0	Q9C5S2	#N/A	#N/A
TRINITY_DN10339_c1_g1	0	0	0	0	0	Q6PA06	Atlastin-2 (EC 3.6.5.-) (ADP-ribosylation factor-like protein 6-interacting protein 2) (ARL-6-interacting protein 2) (Aip-2)	Atl2	Arl6ip2
TRINITY_DN1034_c0_g1	0	0	0	0	0	Q8NBP5	Major facilitator superfamily domain-containing protein 9	Mfsd9
TRINITY_DN10365_c0_g1	0	0	0	0	0	Q62273	Sulfate transporter (Diastrophic dysplasia protein homolog) (ST-OB) (Solute carrier family 26 member 2)	Slc26a2	Dtd	Dtdst
TRINITY_DN10373_c0_g1	0	0	0	0	0	Q99805	Transmembrane 9 superfamily member 2	Tm9sf2
TRINITY_DN10340_c0_g1	0	0	0	0	0	Q7ZX53	Solute carrier family 22 member 15	Slc22a15
TRINITY_DN10341_c1_g1	0	0	0	0	0	A0A0R4IBK5	E3 ubiquitin-protein ligase RNF213 (EC 2.3.2.27) (EC 3.6.4.-) (Mysterin) (RING finger protein 213) (RING-type E3 ubiquitin transferase RNF213)	Rnf213	Mystr
TRINITY_DN10341_c1_g2	0	0	0	0	0	O76082	Solute carrier family 22 member 21 (Organic cation/carnitine transporter 3) (Solute carrier family 22 member 9)	Slc22a21	Octn3	Slc22a9
TRINITY_DN10671_c0_g1	0	0	0	0	0	Q4KLT3	Probable tRNA (uracil-O(2)-)-methyltransferase (EC 2.1.1.211) (Methyltransferase-like protein 19)	Trmt44	Mettl19
TRINITY_DN1063_c0_g1	0	0	0	0	0	Q921W0	Charged multivesicular body protein 1a (Chromatin-modifying protein 1a) (CHMP1a)	Chmp1a	Chmp1	Pcoln3
TRINITY_DN10663_c0_g1	0	0	0	0	0	Q6INL2	#N/A	#N/A
TRINITY_DN10630_c0_g1	0	0	0	0	0	Q8N9F7	Lysophospholipase D GDPD1 (EC 3.1.4.-) (Glycerophosphodiester phosphodiesterase 4) (Glycerophosphodiester phosphodiesterase domain-containing protein 1)	Gdpd1	Gde4
TRINITY_DN10656_c0_g1	0	0	0	0	0	Q7ZUH1	RNA transcription, translation and transport factor protein	RTRAF
TRINITY_DN10675_c0_g1	0	0	0	0	0	Q2VUH7	Dixin (Coiled-coil protein DIX1) (Coiled-coil-DIX1) (DIX domain-containing protein 1)	Dixdc1	Ccd1	Kiaa1735
TRINITY_DN107_c0_g2	0	0	0	0	0	P30874	C-C chemokine receptor type 9 (C-C CKR-9) (CC-CKR-9) (CCR-9) (Chemokine C-C receptor 10) (CD antigen CDw199)	Ccr9	Cmkbr10
TRINITY_DN107_c1_g2	0	0	0	0	0	Q9WUT7	#N/A	#N/A
TRINITY_DN10700_c0_g2	0	0	0	0	0	Q9UGM1	5-hydroxytryptamine receptor 3A (5-HT3-A) (5-HT3A) (5-hydroxytryptamine receptor 3) (5-HT-3) (5-HT3R) (Serotonin receptor 3A) (Serotonin-gated ion channel receptor)	Htr3a	5ht3	Htr3
TRINITY_DN10704_c0_g1	0	0	0	0	0	Q9CWL8	Beta-catenin-like protein 1 (Nuclear-associated protein) (NAP)	Ctnnbl1
TRINITY_DN10709_c0_g1	0	0	0	0	0	G8HTB6	Uromodulin (Tamm-Horsfall urinary glycoprotein) (THP) [Cleaved into: Uromodulin, secreted form]	Umod
TRINITY_DN1072_c0_g1	0	0	0	0	0	Q8BLX4	GDP-fucose transporter 1 (Solute carrier family 35 member C1)	Slc35c1	Fuct1
TRINITY_DN10738_c0_g1	0	0	0	0	0	Q99PV0	Pre-mRNA-processing-splicing factor 8 (Splicing factor Prp8)	Prpf8	Prp8
TRINITY_DN10742_c0_g1	0	0	0	0	0	O60478	Integral membrane protein GPR137B (Transmembrane 7 superfamily member 1 protein)	Gpr137b	Tm7sf1
TRINITY_DN10744_c0_g1	0	0	0	0	0	Q95339	ATP synthase subunit f, mitochondrial (ATP synthase membrane subunit f)	Atp5mf	Atp5j2
TRINITY_DN107447_c0_g1	0	0	0	0	0	O01409	T-box transcription factor TBX21 (T-box protein 21) (T-cell-specific T-box transcription factor T-bet) (Transcription factor TBLYM)	Tbx21	Tbet	Tblym
TRINITY_DN10342_c0_g1	0	0	0	0	0	Q8SPU8	Dehydrogenase/reductase SDR family member 4 (EC 1.1.1.184) (NADPH-dependent carbonyl reductase/NADP-retinol dehydrogenase) (CR) (PHCR) (NADPH-dependent retinol dehydrogenase/reductase) (NDRD) (mouNRDR) (Peroxisomal short-chain alcohol dehydrogenase) (PSCD)	Dhrs4	D14Ucla2
TRINITY_DN10351_c1_g1	0	0	0	0	0	O15439	Multidrug resistance-associated protein 1 (EC 7.6.2.2) (ATP-binding cassette sub-family C member 1) (Glutathione-S-conjugate-translocating ATPase ABCC1) (EC 7.6.2.3) (Leukotriene C(4) transporter) (LTC4 transporter)	Abcc1	Abcc1a	Abcc1b	Mdrap	Mrp
TRINITY_DN10007_c0_g1	0	0	0	0	0	P04323	#N/A	#N/A
TRINITY_DN100078_c0_g1	0	0	0	0	0	A0A0R4I9Y1	E3 ubiquitin-protein ligase RNF213 (EC 2.3.2.27) (EC 3.6.4.-) (Mysterin) (RING finger protein 213) (RING-type E3 ubiquitin transferase RNF213)	Rnf213	Mystr
TRINITY_DN1038_c1_g1	0	0	0	0	0	B5DFC9	#N/A	#N/A
TRINITY_DN10390_c0_g1	0	0	0	0	0	Q5ZL13	Nucleoside diphosphate-linked moiety X motif 19 (Nudix motif 19) (EC 3.6.1.-) (Androgen-regulated protein RP2) (Testosterone-regulated RP2 protein) (RP2p)	Nudt19	D7Rp2e
TRINITY_DN10380_c0_g1	0	0	0	0	0	O00370	LINE-1 retrotransposable element ORF2 protein (ORF2p) (Long interspersed element-1) (L1) (Retrovirus-related Pol polyprotein LINE-1) [Includes: Reverse transcriptase (EC 2.7.7.49); Endonuclease (EC 3.1.21.-)]	Pol	Gm17492
TRINITY_DN10383_c0_g1	0	0	0	0	0	O94876	Transmembrane and coiled-coil domains protein 1	Tmcc1	Kiaa0779
TRINITY_DN10384_c0_g1	0	0	0	0	0	Q15468	SCL-interrupting locus protein homolog	Stil	Sil
TRINITY_DN10386_c0_g1	0	0	0	0	0	O14880	Microsomal glutathione S-transferase 3 (Microsomal GST-3) (Glutathione peroxidase MGST3) (EC 1.11.1.-) (Microsomal glutathione S-transferase III) (Microsomal GST-III)	Mgst3
TRINITY_DN10008_c0_g1	0	0	0	0	0	Q9H0W7	#N/A	#N/A
TRINITY_DN10448_c0_g2	0	0	0	0	0	Q9EQS0	Transaldolase (EC 2.2.1.2)	Taldo1	Tal	Taldo
TRINITY_DN10449_c0_g1	0	0	0	0	0	Q2KIJ5	3-ketodihydrosphingosine reductase (KDS reductase) (EC 1.1.1.102) (3-dehydrosphinganine reductase) (Follicular variant translocation protein 1 homolog) (FVT-1)	Kdsr	Fvt1
TRINITY_DN10450_c0_g4	0	0	0	0	0	Q96NI8	Zinc finger protein OZF (Only zinc finger protein) (Zinc finger protein 146)	Znf146	Ozf	Zfp146
TRINITY_DN10464_c0_g1	0	0	0	0	0	Q9CW79	Golgin subfamily A member 1 (Golgin-97)	Golga1
TRINITY_DN1047_c0_g1	0	0	0	0	0	Q5RDY2	Transmembrane 9 superfamily member 4	Tm9sf4	Kiaa0255
TRINITY_DN104667_c0_g1	0	0	0	0	0	Q53G59	Kelch-like protein 12 (CUL3-interacting protein 1)	Klhl12	C3ip1
TRINITY_DN10479_c0_g3	0	0	0	0	0	Q496Y0	LON peptidase N-terminal domain and RING finger protein 3 (RING finger protein 127)	Lonrf3	Rnf127
TRINITY_DN104805_c0_g1	0	0	0	0	0	Q9ASS6	Peptidyl-prolyl cis-trans isomerase C (PPIase C) (EC 5.2.1.8) (Cyclophilin C) (Rotamase C)	Ppic	Cypc
TRINITY_DN10481_c0_g1	0	0	0	0	0	Q7RTY8	#N/A	#N/A
TRINITY_DN10482_c0_g1	0	0	0	0	0	Q5ZIH9	Coiled-coil domain-containing protein 174	Ccdc174
TRINITY_DN10473_c0_g2	0	0	0	0	0	Q5U374	#N/A	#N/A
TRINITY_DN10506_c0_g2	0	0	0	0	0	O43345	Zinc finger protein 26 (Zfp-26) (Protein mKR3)	Zfp26	Kiaa4196	Mkr3	Zfp-26
TRINITY_DN10506_c0_g5	0	0	0	0	0	Q08AN1	Zinc finger protein 569 (Mszf21) (Zinc finger protein 74) (Zfp-74)	Znf569	Zfp74
TRINITY_DN10509_c0_g1	0	0	0	0	0	Q9CUS9	Signal peptide peptidase-like 3 (SPP-like 3) (EC 3.4.23.-) (Intramembrane protease 2) (IMP-2) (Presenilin-like protein 4)	Sppl3	Imp2	Psl4	Usmg3
TRINITY_DN10453_c0_g1	0	0	0	0	0	B0R160	Leucine-rich repeat and WD repeat-containing protein 1 (ORC-associated protein) (ORCA) (Origin recognition complex-associated protein)	LRWD1	Orca
TRINITY_DN10493_c0_g1	0	0	0	0	0	Q9CR41	Huntingtin-interacting protein K (Huntingtin yeast partner K)	Hypk
TRINITY_DN10497_c0_g1	0	0	0	0	0	Q95SX7	LINE-1 retrotransposable element ORF2 protein (ORF2p) (Long interspersed element-1) (L1) (Retrovirus-related Pol polyprotein LINE-1) [Includes: Reverse transcriptase (EC 2.7.7.49); Endonuclease (EC 3.1.21.-)]	Pol	Gm17492
TRINITY_DN10459_c0_g2	0	0	0	0	0	B7FF06	#N/A	#N/A
TRINITY_DN10489_c0_g1	0	0	0	0	0	Q24K12	G patch domain-containing protein 1	Gpatch1	Gpatc1
TRINITY_DN10489_c1_g1	0	0	0	0	0	Q28F39	Coiled-coil domain-containing protein 134	Ccdc134
TRINITY_DN1046_c0_g1	0	0	0	0	0	O35394	Prenylated Rab acceptor protein 1 (PRA1 family protein 1) (Prenylin)	Rabac1	Pra	Pra1	Praf1
TRINITY_DN10008_c0_g2	0	0	0	0	0	Q8IZR5	CKLF-like MARVEL transmembrane domain-containing protein 4 (Chemokine-like factor superfamily member 4)	Cmtm4	Cklfsf4
TRINITY_DN10_c3_g1	0	0	0	0	0	Q2PG55	Sodium- and chloride-dependent GABA transporter 2 (GAT-2) (Sodium- and chloride-dependent GABA transporter 3) (GAT-3) (Solute carrier family 6 member 13)	Slc6a13	Gabt2	Gabt3	Gat-3	Gat2	Gat3
TRINITY_DN10402_c1_g1	0	0	0	0	0	P35761	Dual specificity protein kinase TTK (EC 2.7.12.1) (ESK) (PYT)	Ttk	Esk
TRINITY_DN10402_c1_g2	0	0	0	0	0	P35761	#N/A	#N/A
TRINITY_DN10403_c0_g1	0	0	0	0	0	Q8BZR9	Nuclear cap-binding protein subunit 3	Ncbp3
TRINITY_DN1043_c0_g1	0	0	0	0	0	Q11126	Alpha-(1,3)-fucosyltransferase 4 (EC 2.4.1.-) (Fucosyltransferase 4) (Fucosyltransferase IV) (Fuc-TIV) (FucT-IV) (Galactoside 3-L-fucosyltransferase)	Fut4	Elft
TRINITY_DN10435_c0_g1	0	0	0	0	0	Q8NCQ5	F-box only protein 15	Fbxo15	Fbx15
TRINITY_DN10436_c0_g1	0	0	0	0	0	P53367	Arfaptin-2 (ADP-ribosylation factor-interacting protein 2)	Arfip2
TRINITY_DN10405_c0_g1	0	0	0	0	0	O95163	Elongator complex protein 1 (ELP1) (IkappaB kinase complex-associated protein) (IKK complex-associated protein)	Elp1	Ikap	Ikbkap
TRINITY_DN10415_c0_g1	0	0	0	0	0	P35670	Copper-transporting ATPase 2 (EC 7.2.2.8) (Copper pump 2) (Wilson disease-associated protein homolog)	Atp7b	Wnd
TRINITY_DN10417_c0_g1	0	0	0	0	0	P55809	Succinyl-CoA:3-ketoacid coenzyme A transferase 1, mitochondrial (EC 2.8.3.5) (3-oxoacid CoA-transferase 1) (Somatic-type succinyl-CoA:3-oxoacid CoA-transferase) (SCOT-s)	Oxct1	Oxct	Scot
TRINITY_DN1042_c1_g1	0	0	0	0	0	B2RX14	Terminal uridylyltransferase 4 (TUTase 4) (EC 2.7.7.52) (Zinc finger CCHC domain-containing protein 11)	Tut4	Kiaa0191	Zcchc11
TRINITY_DN1011_c0_g1	0	0	0	0	0	P09848	Klotho (EC 3.2.1.31) [Cleaved into: Klotho peptide]	Kl
TRINITY_DN10251_c0_g1	0	0	0	0	0	A6NJI9	U2 small nuclear ribonucleoprotein A' (U2 snRNP A')	Snrpa1
TRINITY_DN10605_c0_g1	0	0	0	0	0	Q9H0H3	#N/A	#N/A
TRINITY_DN10605_c0_g2	0	0	0	0	0	E9Q4F2	Kelch-like protein 18	Klhl18
TRINITY_DN1061_c0_g1	0	0	0	0	0	Q9HAR2	Adhesion G protein-coupled receptor L3 (Latrophilin-3) (Lectomedin-3)	Adgrl3	Kiaa0768	Lec3	Lphn3
TRINITY_DN106250_c0_g1	0	0	0	0	0	Q26627	#N/A	#N/A
TRINITY_DN10524_c0_g1	0	0	0	0	0	Q3E6S9	#N/A	#N/A
TRINITY_DN10528_c0_g1	0	0	0	0	0	Q5F3X0	Lysocardiolipin acyltransferase 1 (EC 2.3.1.-) (1-acylglycerol-3-phosphate O-acyltransferase 8) (1-AGP acyltransferase 8) (1-AGPAT 8) (EC 2.3.1.51) (Acyl-CoA:lysocardiolipin acyltransferase 1)	Lclat1	Agpat8	Alcat1	Gm91	Lycat
TRINITY_DN10537_c0_g1	0	0	0	0	0	Q3B7D3	Tectonic-2	Tctn2	Tect2
TRINITY_DN10557_c0_g1	0	0	0	0	0	F6P6X0	Ubiquitin-associated protein 1 (UBAP-1)	Ubap1
TRINITY_DN1056_c0_g2	0	0	0	0	0	Q8BZ25	Ankyrin repeat and protein kinase domain-containing protein 1 (EC 2.7.11.1)	Ankk1
TRINITY_DN10562_c0_g1	0	0	0	0	0	Q8TEA1	tRNA (cytosine(72)-C(5))-methyltransferase NSUN6 (EC 2.1.1.-) (NOL1/NOP2/Sun domain family member 6)	Nsun6
TRINITY_DN10563_c0_g1	0	0	0	0	0	Q96K37	Solute carrier family 35 member E1	Slc35e1
TRINITY_DN10566_c0_g1	0	0	0	0	0	Q63505	General transcription factor 3C polypeptide 1 (TF3C-alpha) (TFIIIC box B-binding subunit) (Transcription factor IIIC 220 kDa subunit) (TFIIIC 220 kDa subunit) (TFIIIC220) (Transcription factor IIIC subunit alpha)	Gtf3c1
TRINITY_DN10756_c0_g3	0	0	0	0	0	Q6DD88	Atlastin-1 (EC 3.6.5.-) (Spastic paraplegia 3A homolog)	Atl1	Spg3a
TRINITY_DN10880_c0_g1	0	0	0	0	0	O95140	Mitofusin-2 (EC 3.6.5.-) (Hypertension-related protein 1) (Mitochondrial assembly regulatory factor) (HSG protein) (Transmembrane GTPase MFN2)	Mfn2	Kiaa0214	Marf
TRINITY_DN108680_c0_g1	0	0	0	0	0	O00338	Sulfotransferase 1C2 (ST1C2) (EC 2.8.2.-)	Sult1c2	Sult1c1
TRINITY_DN10885_c0_g1	0	0	0	0	0	P26187	Methylated-DNA--protein-cysteine methyltransferase (EC 2.1.1.63) (6-O-methylguanine-DNA methyltransferase) (MGMT) (O-6-methylguanine-DNA-alkyltransferase)	Mgmt
TRINITY_DN108862_c0_g1	0	0	0	0	0	P10394	Protein NYNRIN (NYN domain and retroviral integrase catalytic domain-containing protein) (Pol-like protein)	Nynrin	Kiaa1305
TRINITY_DN10888_c0_g1	0	0	0	0	0	P21328	#N/A	#N/A
TRINITY_DN1089_c0_g1	0	0	0	0	0	Q9ERU9	E3 SUMO-protein ligase RanBP2 (EC 2.3.2.-) (Ran-binding protein 2) (RanBP2)	Ranbp2
TRINITY_DN108906_c0_g1	0	0	0	0	0	Q9Y2M2	Protein SSUH2 homolog (Protein ssu-2 homolog)	Ssuh2	Ssu2
TRINITY_DN10891_c0_g1	0	0	0	0	0	Q9NY26	Zinc transporter ZIP1 (Solute carrier family 39 member 1) (Zinc-iron-regulated transporter-like) (Zrt- and Irt-like protein 1) (ZIP-1) (mZIP1)	Slc39a1	Zip1	Zirtl
TRINITY_DN10761_c0_g1	0	0	0	0	0	Q3SYX0	Protein NDRG1 (N-myc downstream-regulated gene 1 protein) (Protein Ndr1)	Ndrg1	Ndr1	Ndrl	Tdd5
TRINITY_DN10798_c0_g1	0	0	0	0	0	Q96NE9	FERM domain-containing protein 6	Frmd6
TRINITY_DN10812_c0_g1	0	0	0	0	0	Q96EX2	RING finger and transmembrane domain-containing protein 2 (Transmembrane protein 118)	Rnft2	Tmem118
TRINITY_DN108079_c0_g1	0	0	0	0	0	P13406	Tyrosine-protein kinase Fyn (EC 2.7.10.2) (Proto-oncogene c-Fyn) (p59-Fyn)	Fyn
TRINITY_DN108305_c0_g1	0	0	0	0	0	G3M4F8	#N/A	#N/A
TRINITY_DN10831_c0_g1	0	0	0	0	0	Q8TEA8	D-aminoacyl-tRNA deacylase 1 (DTD) (EC 3.1.1.96) (DNA-unwinding element-binding protein B) (DUE-B) (Gly-tRNA(Ala) deacylase)	Dtd1	Hars2
TRINITY_DN10834_c0_g1	0	0	0	0	0	Q91XQ0	Dynein heavy chain 8, axonemal (Axonemal beta dynein heavy chain 8) (Ciliary dynein heavy chain 8)	Dnah8	Dnahc8
TRINITY_DN10852_c0_g1	0	0	0	0	0	Q70JS2	Kelch-like protein 12 (CUL3-interacting protein 1)	Klhl12	C3ip1
TRINITY_DN10854_c0_g1	0	0	0	0	0	P55786	Puromycin-sensitive aminopeptidase (PSA) (EC 3.4.11.14) (Cytosol alanyl aminopeptidase) (AAP-S)	Npepps	Psa
TRINITY_DN10856_c0_g1	0	0	0	0	0	Q5U3G1	CD209 antigen-like protein A (Dendritic cell-specific ICAM-3-grabbing non-integrin) (DC-SIGN) (CD antigen CD209)	Cd209a	Cire
TRINITY_DN10868_c0_g1	0	0	0	0	0	Q7ZTY4	Histone-binding protein RBBP4 (Chromatin assembly factor 1 subunit C) (CAF-1 subunit C) (Chromatin assembly factor I p48 subunit) (CAF-I 48 kDa subunit) (CAF-I p48) (Nucleosome-remodeling factor subunit RBAP48) (Retinoblastoma-binding protein 4) (RBBP-4) (Retinoblastoma-binding protein p48)	Rbbp4	Rbap48
TRINITY_DN10835_c0_g1	0	0	0	0	0	Q765A7	GPI inositol-deacylase (EC 3.1.-.-) (Post-GPI attachment to proteins factor 1)	Pgap1
TRINITY_DN10837_c0_g2	0	0	0	0	0	P35129	Ubiquitin-conjugating enzyme E2 D2 (EC 2.3.2.23) ((E3-independent) E2 ubiquitin-conjugating enzyme D2) (EC 2.3.2.24) (E2 ubiquitin-conjugating enzyme D2) (Ubiquitin carrier protein D2) (Ubiquitin-conjugating enzyme E2(17)KB 2) (Ubiquitin-conjugating enzyme E2-17 kDa 2) (Ubiquitin-protein ligase D2)	Ube2d2	Ubc4	Ubch4	Ubch5b	Ube2d2a
TRINITY_DN10775_c0_g1	0	0	0	0	0	Q9Y673	Dolichyl-phosphate beta-glucosyltransferase (DolP-glucosyltransferase) (EC 2.4.1.117) (Asparagine-linked glycosylation protein 5 homolog)	Alg5
TRINITY_DN10780_c0_g1	0	0	0	0	0	Q8N6F8	#N/A	#N/A
TRINITY_DN107809_c0_g1	0	0	0	0	0	Q9NX02	#N/A	#N/A
TRINITY_DN10567_c0_g2	0	0	0	0	0	O75460	Serine/threonine-protein kinase/endoribonuclease IRE1 (Endoplasmic reticulum-to-nucleus signaling 1) (Inositol-requiring protein 1) (Ire1-alpha) (IRE1a) [Includes: Serine/threonine-protein kinase (EC 2.7.11.1); Endoribonuclease (EC 3.1.26.-)]	Ern1	Ire1
TRINITY_DN10568_c0_g1	0	0	0	0	0	Q9CZ49	Kelch-like protein 35	Klhl35
TRINITY_DN11162_c0_g1	0	0	0	0	0	P11654	Nuclear pore membrane glycoprotein 210 (Nuclear pore protein gp210) (Nuclear envelope pore membrane protein POM 210) (POM210) (Nucleoporin Nup210) (Pore membrane protein of 210 kDa)	Nup210	Kiaa0906
TRINITY_DN11167_c0_g1	0	0	0	0	0	Q7T2B9	Myotrophin (Granule cell differentiation protein) (Protein V-1)	Mtpn	Gcdp
TRINITY_DN1117_c0_g1	0	0	0	0	0	Q7ZWG6	Proton-coupled folate transporter (Heme carrier protein 1) (PCFT/HCP1) (Solute carrier family 46 member 1)	Slc46a1	D11Ertd18e	Hcp1	Pcft
TRINITY_DN11180_c0_g1	0	0	0	0	0	P27641	X-ray repair cross-complementing protein 5 (EC 3.6.4.-) (ATP-dependent DNA helicase 2 subunit 2) (ATP-dependent DNA helicase II 80 kDa subunit) (CTC box-binding factor 85 kDa subunit) (CTC85) (CTCBF) (DNA repair protein XRCC5) (Ku autoantigen protein p86 homolog) (Ku80) (Nuclear factor IV)	Xrcc5	G22p2
TRINITY_DN11190_c0_g1	0	0	0	0	0	B2RRL2	#N/A	#N/A
TRINITY_DN1120_c0_g1	0	0	0	0	0	Q3KRE6	Kelch domain-containing protein 2 (Endothelial differentiation inhibitory protein TNG)	Klhdc2
TRINITY_DN11204_c0_g1	0	0	0	0	0	Q8BKN6	Heparan sulfate glucosamine 3-O-sulfotransferase 3A1 (EC 2.8.2.23) (Heparan sulfate D-glucosaminyl 3-O-sulfotransferase 3A1) (Heparan sulfate 3-O-sulfotransferase 3A1)	Hs3st3a1	3ost3a1	Hs3st3a
TRINITY_DN11214_c0_g1	0	0	0	0	0	A2VDD2	Tctex1 domain-containing protein 1	Tctex1d1
TRINITY_DN11256_c0_g1	0	0	0	0	0	Q7ZYA0	G-protein coupled receptor-associated protein LMBRD2 (LMBR1 domain-containing protein 2)	Lmbrd2
TRINITY_DN112652_c0_g2	0	0	0	0	0	Q5SVZ6	52 kDa repressor of the inhibitor of the protein kinase (p52rIPK) (58 kDa interferon-induced protein kinase-interacting protein) (p58IPK-interacting protein) (THAP domain-containing protein 0) (THAP domain-containing protein 12)	Thap12	Prkrir	Thap0
TRINITY_DN11284_c0_g1	0	0	0	0	0	Q9C9C9	Sulfotransferase 4A1 (ST4A1) (EC 2.8.2.-) (Brain sulfotransferase-like protein) (mBR-STL) (Nervous system sulfotransferase) (NST)	Sult4a1	Sultx3
TRINITY_DN11285_c0_g1	0	0	0	0	0	Q9EPH0	Prestin (Solute carrier family 26 member 5)	Slc26a5	Pres
TRINITY_DN11286_c0_g1	0	0	0	0	0	Q9CWP6	Motile sperm domain-containing protein 2	Mospd2
TRINITY_DN11304_c0_g1	0	0	0	0	0	P12815	Programmed cell death protein 6 (ALG-257) (Apoptosis-linked gene 2 protein) (ALG-2) (PMP41)	Pdcd6	Alg2
TRINITY_DN11320_c1_g1	0	0	0	0	0	Q63187	Elongin-A (EloA) (Elongin 110 kDa subunit) (RNA polymerase II transcription factor SIII subunit A1) (SIII p110) (Transcription elongation factor B polypeptide 3)	Eloa	Tceb3
TRINITY_DN1133_c0_g1	0	0	0	0	0	Q7ZX53	Solute carrier family 22 member 15	Slc22a15
TRINITY_DN11270_c1_g1	0	0	0	0	0	P21329	#N/A	#N/A
TRINITY_DN11258_c0_g1	0	0	0	0	0	Q5REH2	Palmitoyltransferase ZDHHC6 (EC 2.3.1.225) (Stearoyltransferase ZDHHC6) (EC 2.3.1.-) (Zinc finger DHHC domain-containing protein 6) (DHHC-6)	Zdhhc6
TRINITY_DN112145_c0_g1	0	0	0	0	0	Q1ECZ2	Kelch-like protein 18	Klhl18
TRINITY_DN1137_c0_g1	0	0	0	0	0	Q5TM26	Protein PRRC2A (HLA-B-associated transcript 2) (Proline-rich and coiled-coil-containing protein 2A)	Prrc2a	Bat2
TRINITY_DN11356_c0_g1	0	0	0	0	0	P46023	Relaxin receptor 1 (Leucine-rich repeat-containing G-protein coupled receptor 7) (Relaxin family peptide receptor 1)	Rxfp1	Gm1018	Lgr7
TRINITY_DN11359_c0_g1	0	0	0	0	0	P20929	Nebulette (Actin-binding Z-disk protein)	Nebl	Lnebl
TRINITY_DN11361_c0_g2	0	0	0	0	0	Q6PBU5	Growth hormone-regulated TBC protein 1 (TBC1 domain family member 6)	Grtp1	Tbc1d6
TRINITY_DN11365_c0_g1	0	0	0	0	0	Q0VFE3	Post-GPI attachment to proteins factor 3 (PER1-like domain-containing protein 1)	Pgap3	Perld1
TRINITY_DN113986_c0_g1	0	0	0	0	0	Q05940	Synaptic vesicular amine transporter (Monoamine transporter) (Solute carrier family 18 member 2) (Vesicular amine transporter 2) (VAT2)	Slc18a2	Vmat2
TRINITY_DN114_c0_g2	0	0	0	0	0	Q5ZIQ3	Heterogeneous nuclear ribonucleoprotein K (hnRNP K)	Hnrnpk	Hnrpk
TRINITY_DN11401_c0_g1	0	0	0	0	0	Q5JVL4	EF-hand domain-containing protein 1 (Myoclonin-1)	Efhc1
TRINITY_DN11371_c0_g1	0	0	0	0	0	Q9CX98	Cytochrome P450 2U1 (Long-chain fatty acid omega-monooxygenase) (EC 1.14.14.80)	Cyp2u1
TRINITY_DN11375_c0_g1	0	0	0	0	0	Q965M2	Toll-like receptor 13 (EC 3.2.2.6)	Tlr13
TRINITY_DN11378_c0_g1	0	0	0	0	0	Q52KK3	Solute carrier family 25 member 51 (Mitochondrial carrier triple repeat protein 1)	Slc25a51	Mcart1
TRINITY_DN11388_c0_g1	0	0	0	0	0	O75132	Zinc finger BED domain-containing protein 4	Zbed4	Kiaa0637
TRINITY_DN11391_c0_g1	0	0	0	0	0	O75460	Kelch-like protein 8	Klhl8
TRINITY_DN11245_c0_g1	0	0	0	0	0	P02707	C-type lectin domain family 4 member K (Langerin) (CD antigen CD207)	Cd207	Clec4k
TRINITY_DN11450_c0_g1	0	0	0	0	0	Q1LYL8	Protein asteroid homolog 1	Aste1
TRINITY_DN11463_c0_g2	0	0	0	0	0	Q5HZ97	Transcription elongation factor SPT4-A (DRB sensitivity-inducing factor small subunit 1) (DSIF small subunit 1) (Transcription elongation factor SPT4 1)	Supt4h1a	Spt4h	Supt4a	Supt4h
TRINITY_DN114681_c0_g1	0	0	0	0	0	Q6DCT2	Armadillo-like helical domain-containing protein 3	Armh3
TRINITY_DN11469_c0_g2	0	0	0	0	0	Q5E9Z8	U6 snRNA-associated Sm-like protein LSm1	Lsm1
TRINITY_DN11479_c0_g1	0	0	0	0	0	Q9Y4A5	Transformation/transcription domain-associated protein (Tra1 homolog)	Trrap
TRINITY_DN11482_c0_g1	0	0	0	0	0	Q969Q6	Serine/threonine-protein phosphatase 2A regulatory subunit B'' subunit gamma (Protein phosphatase subunit G5PR)	Ppp2r3c	G5pr	MNCb-1932
TRINITY_DN114879_c0_g1	0	0	0	0	0	Q06520	Amine sulfotransferase (EC 2.8.2.3) (SULT-X2) (Sulfotransferase 3A1) (ST3A1)	Sult3a1	St3a1
TRINITY_DN11498_c0_g1	0	0	0	0	0	Q8BHL3	TBC1 domain family member 10B (Protein wz3-85)	Tbc1d10b
TRINITY_DN11508_c1_g1	0	0	0	0	0	O44252	#N/A	#N/A
TRINITY_DN11508_c1_g3	0	0	0	0	0	O44252	#N/A	#N/A
TRINITY_DN11515_c0_g1	0	0	0	0	0	Q6UXY8	Transmembrane channel-like protein 6	Tmc6
TRINITY_DN12855_c0_g1	0	0	0	0	0	P21328	#N/A	#N/A
TRINITY_DN128569_c0_g1	0	0	0	0	0	O14832	Phytanoyl-CoA dioxygenase, peroxisomal (EC 1.14.11.18) (Lupus nephritis-associated peptide 1) (Phytanic acid oxidase) (Phytanoyl-CoA alpha-hydroxylase) (PhyH)	Phyh	Ln1	Lnap1	Pahx
TRINITY_DN128570_c0_g1	0	0	0	0	0	Q5RDS0	Patatin-like phospholipase domain-containing protein 6 (Neuropathy target esterase) (EC 3.1.1.5)	Pnpla6	Nte
TRINITY_DN1286_c0_g1	0	0	0	0	0	P09417	Dihydropteridine reductase (EC 1.5.1.34) (HDHPR) (Quinoid dihydropteridine reductase)	Qdpr	Dhpr
TRINITY_DN12862_c0_g1	0	0	0	0	0	P51530	DNA replication ATP-dependent helicase/nuclease DNA2 (DNA replication ATP-dependent helicase-like homolog) [Includes: DNA replication nuclease DNA2 (EC 3.1.-.-); DNA replication ATP-dependent helicase DNA2 (EC 3.6.4.12)]	Dna2	Dna2l	Kiaa0083
TRINITY_DN12864_c0_g1	0	0	0	0	0	Q58DH2	Phosphatidylserine decarboxylase proenzyme, mitochondrial (EC 4.1.1.65) [Cleaved into: Phosphatidylserine decarboxylase beta chain; Phosphatidylserine decarboxylase alpha chain]	Pisd
TRINITY_DN12870_c0_g1	0	0	0	0	0	Q4KLM4	Kelch-like protein 25 (Ectoderm-neural cortex protein 2) (ENC-2)	Klhl25	Enc2
TRINITY_DN12870_c0_g3	0	0	0	0	0	Q8R2P1	#N/A	#N/A
TRINITY_DN128701_c0_g1	0	0	0	0	0	E0CZ16	Kelch-like protein 3	Klhl3
TRINITY_DN12877_c0_g1	0	0	0	0	0	P12075	#N/A	#N/A
TRINITY_DN12881_c0_g2	0	0	0	0	0	Q7ZW41	DNA-directed RNA polymerase II subunit RPB7 (RNA polymerase II subunit B7) (DNA-directed RNA polymerase II subunit G)	Polr2g
TRINITY_DN12881_c0_g5	0	0	0	0	0	Q7ZW41	DNA-directed RNA polymerase II subunit RPB7 (RNA polymerase II subunit B7) (DNA-directed RNA polymerase II subunit G)	Polr2g
TRINITY_DN12886_c0_g1	0	0	0	0	0	Q00968	Low-density lipoprotein receptor-related protein 2 (LRP-2) (Glycoprotein 330) (gp330) (Megalin)	Lrp2
TRINITY_DN12896_c0_g1	0	0	0	0	0	A0A0F7Z3J2	Glycoprotein hormone alpha-2 (Putative secreted protein Zsig51) (Thyrostimulin subunit alpha)	Gpha2	Gpa2	Zsig51
TRINITY_DN1290_c0_g1	0	0	0	0	0	Q86X83	COMM domain-containing protein 2	Commd2
TRINITY_DN12900_c0_g1	0	0	0	0	0	Q5ZIG3	Solute carrier family 25 member 46	Slc25a46
TRINITY_DN12901_c0_g1	0	0	0	0	0	Q62210	Baculoviral IAP repeat-containing protein 2 (EC 2.3.2.27) (Cellular inhibitor of apoptosis 1) (C-IAP1) (Inhibitor of apoptosis protein 2) (mIAP2) (RING-type E3 ubiquitin transferase BIRC2)	Birc2
TRINITY_DN12901_c1_g1	0	0	0	0	0	Q90660	Baculoviral IAP repeat-containing protein 2 (EC 2.3.2.27) (Cellular inhibitor of apoptosis 1) (C-IAP1) (Inhibitor of apoptosis protein 2) (mIAP2) (RING-type E3 ubiquitin transferase BIRC2)	Birc2
TRINITY_DN12901_c1_g2	0	0	0	0	0	O08863	#N/A	#N/A
TRINITY_DN12902_c0_g1	0	0	0	0	0	Q02388	#N/A	#N/A
TRINITY_DN12920_c0_g1	0	0	0	0	0	Q8BZM0	Kelch-like protein 12 (CUL3-interacting protein 1)	Klhl12	C3ip1
TRINITY_DN12923_c0_g1	0	0	0	0	0	Q3SXB8	#N/A	#N/A
TRINITY_DN12924_c0_g1	0	0	0	0	0	A5PMY6	#N/A	#N/A
TRINITY_DN129375_c0_g1	0	0	0	0	0	Q9DC53	Copine-8 (Copine VIII)	Cpne8
TRINITY_DN129377_c0_g1	0	0	0	0	0	Q28558	#N/A	#N/A
TRINITY_DN12955_c0_g1	0	0	0	0	0	Q76MJ5	Serine/threonine-protein kinase/endoribonuclease IRE2 (Endoplasmic reticulum-to-nucleus signaling 2) (Inositol-requiring protein 2) (Ire1-beta) (IRE1b) (mIre1) [Includes: Serine/threonine-protein kinase (EC 2.7.11.1); Endoribonuclease (EC 3.1.26.-)]	Ern2	Ire2
TRINITY_DN1296_c0_g2	0	0	0	0	0	Q9UBQ0	Vacuolar protein sorting-associated protein 29 (Vesicle protein sorting 29)	Vps29
TRINITY_DN12960_c0_g1	0	0	0	0	0	Q568J8	Transmembrane protein 256	Tmem256
TRINITY_DN12962_c0_g1	0	0	0	0	0	O60704	Protein-tyrosine sulfotransferase 2 (EC 2.8.2.20) (Tyrosylprotein sulfotransferase 2) (TPST-2)	Tpst2	D5ucla3
TRINITY_DN12962_c1_g1	0	0	0	0	0	Q95SX7	LINE-1 retrotransposable element ORF2 protein (ORF2p) (Long interspersed element-1) (L1) (Retrovirus-related Pol polyprotein LINE-1) [Includes: Reverse transcriptase (EC 2.7.7.49); Endonuclease (EC 3.1.21.-)]	Pol	Gm17492
TRINITY_DN12984_c0_g1	0	0	0	0	0	Q5E9J6	E3 ubiquitin-protein ligase RNF34 (EC 2.3.2.27) (Phafin-1) (RING finger protein 34) (RING-type E3 ubiquitin transferase RNF34)	Rnf34
TRINITY_DN129857_c0_g1	0	0	0	0	0	Q9Z1M7	LARGE xylosyl- and glucuronyltransferase 1 (EC 2.4.-.-) (Acetylglucosaminyltransferase-like 1A) (Glycosyltransferase-like protein) [Includes: Xylosyltransferase LARGE (EC 2.4.2.-); Beta-1,3-glucuronyltransferase LARGE (EC 2.4.1.-)]	Large1	Kiaa0609	Large
TRINITY_DN13016_c0_g1	0	0	0	0	0	Q60HE9	Lysosomal alpha-mannosidase (Laman) (EC 3.2.1.24) (Lysosomal acid alpha-mannosidase) (Mannosidase alpha class 2B member 1) (Mannosidase alpha-B)	Man2b1	Laman	Man2b	Manb
TRINITY_DN13019_c0_g1	0	0	0	0	0	Q6QGW5	Steroid receptor RNA activator 1 (Steroid receptor RNA activator protein) (SRAP)	Sra1
TRINITY_DN1302_c0_g3	0	0	0	0	0	Q8NA69	#N/A	#N/A
TRINITY_DN130204_c0_g1	0	0	0	0	0	F1LZF0	Kelch-like protein 2	Klhl2
TRINITY_DN130243_c0_g1	0	0	0	0	0	P20918	Plasminogen (EC 3.4.21.7) [Cleaved into: Plasmin heavy chain A; Activation peptide; Angiostatin; Plasmin heavy chain A, short form; Plasmin light chain B]	Plg
TRINITY_DN130291_c0_g1	0	0	0	0	0	P45481	Histone lysine acetyltransferase CREBBP (EC 2.3.1.48) (Protein-lysine acetyltransferase CREBBP) (EC 2.3.1.-)	Crebbp	Cbp
TRINITY_DN1303_c1_g1	0	0	0	0	0	P21328	LINE-1 retrotransposable element ORF2 protein (ORF2p) (Long interspersed element-1) (L1) (Retrovirus-related Pol polyprotein LINE-1) [Includes: Reverse transcriptase (EC 2.7.7.49); Endonuclease (EC 3.1.21.-)]	Pol	Gm17492
TRINITY_DN1303_c2_g2	0	0	0	0	0	P08548	LINE-1 retrotransposable element ORF2 protein (ORF2p) (Long interspersed element-1) (L1) (Retrovirus-related Pol polyprotein LINE-1) [Includes: Reverse transcriptase (EC 2.7.7.49); Endonuclease (EC 3.1.21.-)]	Pol	Gm17492
TRINITY_DN1304_c6_g1	0	0	0	0	0	Q13490	Baculoviral IAP repeat-containing protein 2 (EC 2.3.2.27) (Cellular inhibitor of apoptosis 1) (C-IAP1) (Inhibitor of apoptosis protein 2) (mIAP2) (RING-type E3 ubiquitin transferase BIRC2)	Birc2
TRINITY_DN13041_c0_g1	0	0	0	0	0	Q5ZJ08	Tyrosine--tRNA ligase, cytoplasmic (EC 6.1.1.1) (Tyrosyl-tRNA synthetase) (TyrRS) [Cleaved into: Tyrosine--tRNA ligase, cytoplasmic, N-terminally processed]	Yars1	Yars
TRINITY_DN1305_c0_g1	0	0	0	0	0	P21449	ATP-dependent translocase ABCB1 (ATP-binding cassette sub-family B member 1B) (Multidrug resistance protein 1B) (EC 7.6.2.2) (P-glycoprotein 1) (Phospholipid transporter ABCB1) (EC 7.6.2.1) (CD antigen CD243)	Abcb1b	Abcb1	Mdr1	Mdr1b	Pgy1	Pgy1-1
TRINITY_DN13050_c0_g2	0	0	0	0	0	P27401	#N/A	#N/A
TRINITY_DN13067_c0_g1	0	0	0	0	0	O88491	Histone-lysine N-methyltransferase, H3 lysine-36 specific (EC 2.1.1.357) (H3-K36-HMTase) (Nuclear receptor-binding SET domain-containing protein 1) (NR-binding SET domain-containing protein)	Nsd1
TRINITY_DN11516_c0_g1	0	0	0	0	0	Q568Q0	8-oxo-dGDP phosphatase NUDT18 (EC 3.6.1.58) (2-hydroxy-dADP phosphatase) (7,8-dihydro-8-oxoguanine phosphatase) (MutT homolog 3) (Nucleoside diphosphate-linked moiety X motif 18) (Nudix motif 18)	Nudt18	Mth3
TRINITY_DN1152_c0_g2	0	0	0	0	0	Q6BD04	#N/A	#N/A
TRINITY_DN11526_c0_g1	0	0	0	0	0	Q9UBZ4	DNA-(apurinic or apyrimidinic site) endonuclease 2 (EC 3.1.-.-) (APEX nuclease 2) (Apurinic-apyrimidinic endonuclease 2) (AP endonuclease 2)	Apex2	Ape2
TRINITY_DN11534_c0_g1	0	0	0	0	0	Q95209	Sortilin-related receptor (Gp250) (Low-density lipoprotein receptor relative with 11 ligand-binding repeats) (LDLR relative with 11 ligand-binding repeats) (LR11) (SorLA-1) (Sorting protein-related receptor containing LDLR class A repeats) (mSorLA)	Sorl1
TRINITY_DN1156_c0_g1	0	0	0	0	0	Q8CHY6	Transcriptional repressor p66 alpha (GATA zinc finger domain-containing protein 2A)	Gatad2a
TRINITY_DN11569_c0_g1	0	0	0	0	0	B0BN86	Transmembrane protein 11, mitochondrial (Protein PM1)	Tmem11
TRINITY_DN11572_c0_g1	0	0	0	0	0	Q9Z0H7	B-cell lymphoma/leukemia 10 (B-cell CLL/lymphoma 10) (Bcl-10) (CARD-containing molecule enhancing NF-kappa-B) (CARD-like apoptotic protein) (mCLAP) (CED-3/ICH-1 prodomain homologous E10-like regulator) (mCIPER) (Cellular homolog of vCARMEN) (cCARMEN) (Cellular-E10) (c-E10) (Mammalian CARD-containing adapter molecule E10) (mE10)	Bcl10	Ciper	Clap
TRINITY_DN11573_c0_g1	0	0	0	0	0	A2RUC4	tRNA wybutosine-synthesizing protein 5 (EC 1.14.11.42) (tRNA(Phe) (7-(3-amino-3-carboxypropyl)wyosine(37)-C(2))-hydroxylase)	Tyw5
TRINITY_DN11575_c0_g1	0	0	0	0	0	Q27802	Cytoplasmic dynein 2 heavy chain 1 (Cytoplasmic dynein 2 heavy chain) (Dynein cytoplasmic heavy chain 2) (Dynein heavy chain 11) (mDHC11) (Dynein heavy chain isotype 1B)	Dync2h1	Dhc1b	Dnchc2	Kiaa1997
TRINITY_DN1158_c0_g1	0	0	0	0	0	Q5R4H4	Epidermal growth factor receptor kinase substrate 8	Eps8
TRINITY_DN11585_c0_g2	0	0	0	0	0	Q9VC57	#N/A	#N/A
TRINITY_DN11586_c0_g1	0	0	0	0	0	Q55EX9	#N/A	#N/A
TRINITY_DN11592_c0_g1	0	0	0	0	0	Q5ZIF1	Adipocyte plasma membrane-associated protein (Protein DD16)	Apmap
TRINITY_DN11225_c0_g2	0	0	0	0	0	Q6NX49	RB-associated KRAB zinc finger protein (RB-associated KRAB repressor) (Zinc finger protein 769)	Rbak	Znf769
TRINITY_DN11226_c0_g1	0	0	0	0	0	Q8K3Z0	#N/A	#N/A
TRINITY_DN11237_c0_g1	0	0	0	0	0	P58872	Rhomboid-related protein 3 (EC 3.4.21.105) (Ventrhoid transmembrane protein)	Rhbdl3	Rhbdl4	Vrho
TRINITY_DN10569_c0_g1	0	0	0	0	0	Q08CF3	Coiled-coil domain-containing protein 61	Ccdc61	Gm159
TRINITY_DN10574_c0_g1	0	0	0	0	0	Q9QXA6	b(0,+)-type amino acid transporter 1 (b(0,+)AT1) (Glycoprotein-associated amino acid transporter b0,+AT1) (Solute carrier family 7 member 9)	Slc7a9	Bat1
TRINITY_DN11063_c0_g1	0	0	0	0	0	Q91YR7	Pre-mRNA-processing factor 6 (PRP6 homolog) (U5 snRNP-associated 102 kDa protein) (U5-102 kDa protein)	Prpf6
TRINITY_DN1105_c22_g1	0	0	0	0	0	D3Z8N4	Kelch-like protein 20 (Kelch-like ECT2-interacting protein)	Klhl20	Kiaa4210	Kleip
TRINITY_DN109_c0_g2	0	0	0	0	0	Q29HY3	Cell division control protein 42 homolog (EC 3.6.5.2) (G25K GTP-binding protein)	Cdc42
TRINITY_DN10906_c0_g1	0	0	0	0	0	Q03070	Beta-chimaerin (Beta-chimerin) (Rho GTPase-activating protein 3)	Chn2	Arhgap3	Bch
TRINITY_DN109416_c0_g1	0	0	0	0	0	A1E2V0	Baculoviral IAP repeat-containing protein 3 (EC 2.3.2.27) (Cellular inhibitor of apoptosis 2) (C-IAP2) (Inhibitor of apoptosis protein 1) (mIAP1) (RING-type E3 ubiquitin transferase BIRC3)	Birc3
TRINITY_DN11833_c0_g1	0	0	0	0	0	Q6DFV8	von Willebrand factor D and EGF domain-containing protein	Vwde	Gm467
TRINITY_DN11845_c0_g1	0	0	0	0	0	B1AUE5	Peroxisome biogenesis factor 10 (Peroxin-10) (Peroxisomal biogenesis factor 10) (Peroxisome assembly protein 10)	Pex10
TRINITY_DN11846_c0_g1	0	0	0	0	0	Q6P6Z8	2-oxoglutarate dehydrogenase, mitochondrial (EC 1.2.4.2) (2-oxoglutarate dehydrogenase complex component E1) (OGDC-E1) (Alpha-ketoglutarate dehydrogenase)	Ogdh	Kiaa4192
TRINITY_DN11850_c0_g1	0	0	0	0	0	Q6A070	TOG array regulator of axonemal microtubules protein 1 (Crescerin-1) (Protein FAM179B)	Togaram1	Fam179b	Kiaa0423
TRINITY_DN118565_c0_g1	0	0	0	0	0	O42606	Neurogenin-1 (NGN-1) (Helix-loop-helix protein mATH-4C) (mATH4C) (Neurogenic basic-helix-loop-helix protein) (Neurogenic differentiation factor 3) (NeuroD3)	Neurog1	Ath4c	Neurod3	Ngn	Ngn1
TRINITY_DN11885_c0_g1	0	0	0	0	0	Q8TBZ3	WD repeat-containing protein 20	Wdr20	Wdr20b	Wdr20rt
TRINITY_DN11890_c0_g1	0	0	0	0	0	Q9Y253	DNA polymerase eta (EC 2.7.7.7) (RAD30 homolog A) (Xeroderma pigmentosum variant type protein homolog)	Polh	Rad30a	Xpv
TRINITY_DN11896_c0_g1	0	0	0	0	0	Q6GMK0	Alpha-1,3-mannosyl-glycoprotein 4-beta-N-acetylglucosaminyltransferase B (EC 2.4.1.145) (N-glycosyl-oligosaccharide-glycoprotein N-acetylglucosaminyltransferase IVb) (GlcNAc-T IVb) (GnT-IVb) (N-acetylglucosaminyltransferase IVb) (UDP-N-acetylglucosamine: alpha-1,3-D-mannoside beta-1,4-N-acetylglucosaminyltransferase IVb)	Mgat4b
TRINITY_DN11917_c1_g2	0	0	0	0	0	Q8C3F7	#N/A	#N/A
TRINITY_DN1194_c0_g2	0	0	0	0	0	O54950	5'-AMP-activated protein kinase subunit gamma-1 (AMPK gamma1) (AMPK subunit gamma-1) (AMPKg)	Prkag1	Prkaac
TRINITY_DN12010_c0_g1	0	0	0	0	0	Q9UJN7	Zinc finger protein 583	Znf583	Zfp583
TRINITY_DN12036_c0_g1	0	0	0	0	0	Q28DH9	Centrosomal protein of 76 kDa (Cep76)	Cep76
TRINITY_DN12041_c0_g2	0	0	0	0	0	P56658	Adenosine deaminase (EC 3.5.4.4) (Adenosine aminohydrolase)	Ada
TRINITY_DN12042_c1_g1	0	0	0	0	0	Q921N8	G protein pathway suppressor 2 (GPS-2)	Gps2
TRINITY_DN12046_c0_g1	0	0	0	0	0	Q28FY0	Protein tilB homolog (Leucine-rich repeat-containing protein 6) (Leucine-rich testis-specific protein) (Testis-specific leucine-rich repeat protein)	Lrrc6	Lrtp	Mc2
TRINITY_DN12047_c0_g1	0	0	0	0	0	Q94B65	Solute carrier family 35 member D3 (Fringe connection-like protein 1)	Slc35d3	Frcl1
TRINITY_DN1205_c0_g1	0	0	0	0	0	F1MCY2	Phosphatase and actin regulator 1	Phactr1
TRINITY_DN12055_c0_g1	0	0	0	0	0	Q7ZWY2	PIH1 domain-containing protein 1 (Nucleolar protein 17 homolog)	Pih1d1	Nop17
TRINITY_DN12063_c0_g1	0	0	0	0	0	Q5R8Z8	Ras-related protein Rab-14	Rab14
TRINITY_DN12067_c0_g1	0	0	0	0	0	B0KWH8	THO complex subunit 2 (Tho2)	Thoc2
TRINITY_DN12068_c1_g2	0	0	0	0	0	Q5U374	Actin-binding protein IPP (Intracisternal A particle-promoted polypeptide) (IPP) (Murine IAP-promoted placenta-expressed protein) (Protein MIPP)	Ipp	Mipp
TRINITY_DN12071_c0_g1	0	0	0	0	0	P21328	LINE-1 retrotransposable element ORF2 protein (ORF2p) (Long interspersed element-1) (L1) (Retrovirus-related Pol polyprotein LINE-1) [Includes: Reverse transcriptase (EC 2.7.7.49); Endonuclease (EC 3.1.21.-)]	Pol	Gm17492
TRINITY_DN12072_c0_g2	0	0	0	0	0	Q96PQ7	Kelch-like protein 9	Klhl9	Kiaa1354
TRINITY_DN12072_c1_g1	0	0	0	0	0	Q96PQ7	Kelch-like protein 7	Klhl7
TRINITY_DN12075_c0_g1	0	0	0	0	0	O57590	Surfeit locus protein 4	Surf4	Surf-4
TRINITY_DN12076_c0_g1	0	0	0	0	0	A0JP70	WD repeat-containing protein 90	Wdr90	Kiaa1924
TRINITY_DN12078_c0_g1	0	0	0	0	0	P58242	Acid sphingomyelinase-like phosphodiesterase 3b (ASM-like phosphodiesterase 3b) (EC 3.1.4.-)	Smpdl3b	Asml3b
TRINITY_DN12081_c0_g2	0	0	0	0	0	C3VPR6	#N/A	#N/A
TRINITY_DN12014_c0_g1	0	0	0	0	0	Q03111	Protein AF-9 (Myeloid/lymphoid or mixed-lineage leukemia translocated to chromosome 3 protein homolog)	Mllt3	Af9
TRINITY_DN120166_c0_g1	0	0	0	0	0	A5D8Q0	#N/A	#N/A
TRINITY_DN12021_c0_g1	0	0	0	0	0	Q8K078	Solute carrier organic anion transporter family member 4A1 (Organic anion-transporting polypeptide E) (OATP-E) (Sodium-independent organic anion transporter E) (Solute carrier family 21 member 12)	Slco4a1	Oatp4a1	Oatpe	Slc21a12
TRINITY_DN12027_c0_g2	0	0	0	0	0	Q1RMU1	R-spondin-3 (Cabriolet) (Cysteine-rich and single thrombospondin domain-containing protein 1) (Cristin-1) (Nucleopondin) (Roof plate-specific spondin-3)	Rspo3
TRINITY_DN12029_c0_g1	0	0	0	0	0	P14650	Eosinophil peroxidase (EPO) (EC 1.11.1.7) [Cleaved into: Eosinophil peroxidase light chain; Eosinophil peroxidase heavy chain]	Epx	Eper
TRINITY_DN120299_c0_g1	0	0	0	0	0	Q32LB5	Glioma pathogenesis-related protein 1 (GliPR 1)	Glipr1
TRINITY_DN11929_c0_g1	0	0	0	0	0	Q3U0M1	Trafficking protein particle complex subunit 9 (NIK- and IKBKB-binding protein)	Trappc9	Kiaa1882	Nibp
TRINITY_DN118995_c0_g1	0	0	0	0	0	Q95SX7	#N/A	#N/A
TRINITY_DN11969_c1_g1	0	0	0	0	0	Q8R2H4	Kelch-like protein 12 (CUL3-interacting protein 1)	Klhl12	C3ip1
TRINITY_DN11911_c0_g1	0	0	0	0	0	P21956	Lactadherin (MFGM) (Milk fat globule-EGF factor 8) (MFG-E8) (SED1) (Sperm surface protein SP47) (MP47)	Mfge8
TRINITY_DN119754_c0_g1	0	0	0	0	0	Q8WPD0	Brevican core protein	Bcan
TRINITY_DN11984_c0_g1	0	0	0	0	0	Q9EP89	Serine beta-lactamase-like protein LACTB, mitochondrial (EC 3.4.-.-)	Lactb	Lact1
TRINITY_DN11913_c0_g1	0	0	0	0	0	A7RX26	Probable imidazolonepropionase (EC 3.5.2.7) (Amidohydrolase domain-containing protein 1)	Amdhd1
TRINITY_DN120073_c0_g1	0	0	0	0	0	P23074	#N/A	#N/A
TRINITY_DN12009_c0_g1	0	0	0	0	0	Q5U575	Kelch-like protein 12 (CUL3-interacting protein 1)	Klhl12	C3ip1
TRINITY_DN10959_c0_g1	0	0	0	0	0	Q90473	Heat shock cognate 71 kDa protein (Heat shock 70 kDa protein 8)	Hspa8	Hsc70	Hsc73
TRINITY_DN10960_c0_g1	0	0	0	0	0	P98133	Fibrillin-1 [Cleaved into: Asprosin]	Fbn1	Fbn-1
TRINITY_DN11005_c0_g1	0	0	0	0	0	Q6BD04	#N/A	#N/A
TRINITY_DN10965_c0_g1	0	0	0	0	0	A0JNB1	Zinc finger protein 2 (Zfp-2) (Protein mKR2)	Zfp2	Fnp-2	Mkr2	Zfp-2
TRINITY_DN10969_c0_g1	0	0	0	0	0	Q8N442	Translation factor Guf1, mitochondrial (EC 3.6.5.-) (Elongation factor 4 homolog) (EF-4) (GTPase Guf1) (Ribosomal back-translocase)	Guf1
TRINITY_DN1102_c0_g1	0	0	0	0	0	P41413	Proprotein convertase subtilisin/kexin type 5 (EC 3.4.21.-) (Proprotein convertase 5) (PC5) (Proprotein convertase 6) (PC6) (Subtilisin-like proprotein convertase 6) (SPC6) (Subtilisin/kexin-like protease PC5)	Pcsk5
TRINITY_DN1103_c0_g1	0	0	0	0	0	P62257	Ubiquitin-conjugating enzyme E2 H (EC 2.3.2.23) ((E3-independent) E2 ubiquitin-conjugating enzyme H) (EC 2.3.2.24) (E2 ubiquitin-conjugating enzyme H) (UBCH2) (Ubiquitin carrier protein H) (Ubiquitin-conjugating enzyme E2-20K) (Ubiquitin-protein ligase H)	Ube2h
TRINITY_DN10982_c0_g2	0	0	0	0	0	A8DZE7	Short-chain dehydrogenase/reductase family 42E member 1 (EC 1.1.1.-)	Sdr42e1
TRINITY_DN10972_c0_g1	0	0	0	0	0	Q9Z265	Serine/threonine-protein kinase Chk2 (EC 2.7.11.1) (CHK2 checkpoint homolog) (Checkpoint kinase 2)	Chek2	Chk2	Rad53
TRINITY_DN10974_c0_g1	0	0	0	0	0	Q86WA6	Valacyclovir hydrolase (VACVase) (Valacyclovirase) (EC 3.1.-.-) (Biphenyl hydrolase-like protein)	Bphl
TRINITY_DN10978_c0_g1	0	0	0	0	0	A8MYZ0	Probable ubiquitin carboxyl-terminal hydrolase MINDY-4 (EC 3.4.19.12) (Probable deubiquitinating enzyme MINDY-4)	Mindy4	Fam188b
TRINITY_DN11073_c0_g1	0	0	0	0	0	Q9CUB6	#N/A	#N/A
TRINITY_DN11074_c0_g1	0	0	0	0	0	Q9QY53	Nephrocystin-1	Nphp1	Nph1
TRINITY_DN11078_c0_g1	0	0	0	0	0	O70239	Axin-1 (Axis inhibition protein 1) (Protein Fused)	Axin1	Axin	Fu
TRINITY_DN11079_c0_g1	0	0	0	0	0	Q6P9S1	ATM interactor (ATM/ATR-substrate CHK2-interacting zinc finger protein) (ASCIZ)	Atmin	Kiaa0431
TRINITY_DN11088_c0_g1	0	0	0	0	0	P40240	CD9 antigen (CD antigen CD9)	Cd9
TRINITY_DN1109_c2_g1	0	0	0	0	0	A7X5R6	Large proline-rich protein BAG6 (BAG family molecular chaperone regulator 6) (BCL2-associated athanogene 6) (BAG-6) (HLA-B-associated transcript 3) (Protein Scythe)	Bag6	Bat3
TRINITY_DN1109_c2_g2	0	0	0	0	0	A7X5R6	Large proline-rich protein BAG6 (BAG family molecular chaperone regulator 6) (BCL2-associated athanogene 6) (BAG-6) (HLA-B-associated transcript 3) (Protein Scythe)	Bag6	Bat3
TRINITY_DN11600_c0_g1	0	0	0	0	0	Q9NYB9	Abl interactor 2 (Abelson interactor 2) (Abi-2) (Abl-binding protein 3) (AblBP3) (Arg-binding protein 1) (ArgBP1)	Abi2
TRINITY_DN11600_c0_g2	0	0	0	0	0	P62484	Abl interactor 2 (Abelson interactor 2) (Abi-2) (Abl-binding protein 3) (AblBP3) (Arg-binding protein 1) (ArgBP1)	Abi2
TRINITY_DN11608_c0_g1	0	0	0	0	0	P08770	Zinc finger BED domain-containing protein 4	Zbed4	Kiaa0637
TRINITY_DN1161_c0_g1	0	0	0	0	0	O60216	Double-strand-break repair protein rad21 homolog (mHR21) (Pokeweed agglutinin-binding protein 29) (PW29) (SCC1 homolog) [Cleaved into: 64-kDa C-terminal product (64-kDa carboxy-terminal product)]	Rad21	Hr21	Scc1
TRINITY_DN11653_c1_g2	0	0	0	0	0	A2VE47	ADP-dependent glucokinase (ADP-GK) (ADPGK) (EC 2.7.1.147)	Adpgk
TRINITY_DN11648_c0_g1	0	0	0	0	0	Q9JI74	Kelch-like protein 1	Klhl1
TRINITY_DN11654_c0_g1	0	0	0	0	0	Q94A68	#N/A	#N/A
TRINITY_DN1180_c0_g1	0	0	0	0	0	Q5ZMQ0	Armadillo repeat-containing protein 1	Armc1
TRINITY_DN11808_c0_g1	0	0	0	0	0	O43933	Peroxisome biogenesis factor 1 (Peroxin-1)	Pex1
TRINITY_DN1181_c0_g1	0	0	0	0	0	Q5F3S2	#N/A	#N/A
TRINITY_DN11818_c0_g1	0	0	0	0	0	P42125	Enoyl-CoA delta isomerase 1, mitochondrial (EC 5.3.3.8) (3,2-trans-enoyl-CoA isomerase) (Delta(3),Delta(2)-enoyl-CoA isomerase) (D3,D2-enoyl-CoA isomerase) (Dodecenoyl-CoA isomerase)	Eci1	Dci
TRINITY_DN1182_c0_g1	0	0	0	0	0	Q9NRZ9	Lymphocyte-specific helicase (EC 3.6.4.-) (Proliferation-associated SNF2-like protein)	Hells	Lsh	Pasg
TRINITY_DN11614_c3_g1	0	0	0	0	0	O75132	Zinc finger BED domain-containing protein 4	Zbed4	Kiaa0637
TRINITY_DN11617_c0_g1	0	0	0	0	0	F1QXM5	Probable D-lactate dehydrogenase, mitochondrial (DLD) (Lactate dehydrogenase D) (EC 1.1.2.4)	Ldhd
TRINITY_DN11633_c0_g1	0	0	0	0	0	B0BLZ5	Protein THEM6	Them6
TRINITY_DN11634_c0_g1	0	0	0	0	0	Q0Z8I9	#N/A	#N/A
TRINITY_DN11662_c0_g4	0	0	0	0	0	Q9JME2	Carbohydrate sulfotransferase 11 (EC 2.8.2.5) (Chondroitin 4-O-sulfotransferase 1) (Chondroitin 4-sulfotransferase 1) (C4S-1) (C4ST-1) (C4ST1)	Chst11
TRINITY_DN11663_c0_g1	0	0	0	0	0	Q9JIB3	Baculoviral IAP repeat-containing protein 1g (Neuronal apoptosis inhibitory protein 7)	Naip7	Birc1g
TRINITY_DN11665_c0_g1	0	0	0	0	0	Q567C6	Zinc finger protein 367 (C2H2 zinc finger protein ZFF29)	Znf367	Zff29	Zfp367
TRINITY_DN11671_c0_g1	0	0	0	0	0	Q0MQI4	NADH dehydrogenase [ubiquinone] flavoprotein 1, mitochondrial (EC 7.1.1.2) (Complex I-51kD) (CI-51kD) (NADH-ubiquinone oxidoreductase 51 kDa subunit)	Ndufv1
TRINITY_DN11672_c0_g1	0	0	0	0	0	P23470	Receptor-type tyrosine-protein phosphatase gamma (Protein-tyrosine phosphatase gamma) (R-PTP-gamma) (EC 3.1.3.48)	Ptprg
TRINITY_DN11677_c0_g1	0	0	0	0	0	Q95254	Growth hormone secretagogue receptor type 1 (GHS-R) (GH-releasing peptide receptor) (GHRP) (Ghrelin receptor)	Ghsr
TRINITY_DN1168_c0_g1	0	0	0	0	0	Q5RE15	26S proteasome non-ATPase regulatory subunit 8 (26S proteasome regulatory subunit RPN12) (26S proteasome regulatory subunit S14)	Psmd8
TRINITY_DN11680_c0_g3	0	0	0	0	0	Q9NBX5	#N/A	#N/A
TRINITY_DN116833_c1_g1	0	0	0	0	0	P86854	#N/A	#N/A
TRINITY_DN11685_c0_g1	0	0	0	0	0	Q5TJF5	Estradiol 17-beta-dehydrogenase 8 (EC 1.1.1.62) (17-beta-hydroxysteroid dehydrogenase 8) (17-beta-HSD 8) (3-ketoacyl-[acyl-carrier-protein] reductase alpha subunit) (KAR alpha subunit) (3-oxoacyl-[acyl-carrier-protein] reductase) (EC 1.1.1.-) (Protein Ke6) (Ke-6) (Testosterone 17-beta-dehydrogenase 8) (EC 1.1.1.239)	Hsd17b8	H2-Ke6	Hke6
TRINITY_DN11693_c0_g1	0	0	0	0	0	Q6DGA7	#N/A	#N/A
TRINITY_DN11705_c0_g1	0	0	0	0	0	Q0VFM0	Histone-lysine N-methyltransferase SETMAR (EC 2.1.1.357) (SET domain without mariner transposase fusion protein)	Setmar
TRINITY_DN11117_c0_g1	0	0	0	0	0	E1B932	#N/A	#N/A
TRINITY_DN11434_c0_g1	0	0	0	0	0	Q8TDB6	E3 ubiquitin-protein ligase DTX3L (EC 2.3.2.27) (Protein deltex-3-like) (RING-type E3 ubiquitin transferase DTX3L)	Dtx3l	Bbap
TRINITY_DN11420_c0_g1	0	0	0	0	0	Q96PZ7	CUB and sushi domain-containing protein 1 (CUB and sushi multiple domains protein 1)	Csmd1
TRINITY_DN11424_c0_g2	0	0	0	0	0	O15084	Serine/threonine-protein phosphatase 6 regulatory ankyrin repeat subunit A (PP6-ARS-A) (Serine/threonine-protein phosphatase 6 regulatory subunit ARS-A) (Ankyrin repeat domain-containing protein 28) (Phosphatase interactor targeting protein hnRNP K) (PITK)	Ankrd28
TRINITY_DN114279_c0_g1	0	0	0	0	0	Q3UFB7	High affinity nerve growth factor receptor (EC 2.7.10.1) (Neurotrophic tyrosine kinase receptor type 1)	Ntrk1
TRINITY_DN11434_c1_g1	0	0	0	0	0	Q3UIR3	E3 ubiquitin-protein ligase DTX3L (EC 2.3.2.27) (Protein deltex-3-like) (RING-type E3 ubiquitin transferase DTX3L)	Dtx3l	Bbap
TRINITY_DN1144_c0_g1	0	0	0	0	0	P21328	LINE-1 retrotransposable element ORF2 protein (ORF2p) (Long interspersed element-1) (L1) (Retrovirus-related Pol polyprotein LINE-1) [Includes: Reverse transcriptase (EC 2.7.7.49); Endonuclease (EC 3.1.21.-)]	Pol	Gm17492
TRINITY_DN110974_c0_g1	0	0	0	0	0	Q86WZ6	Zinc finger protein 431 (Zinc finger protein 932)	Znf431	Zfp431	Zfp932
TRINITY_DN1111_c0_g1	0	0	0	0	0	O48646	Phospholipid hydroperoxide glutathione peroxidase (PHGPx) (EC 1.11.1.12) (Glutathione peroxidase 4) (GPx-4) (GSHPx-4)	Gpx4
TRINITY_DN11122_c0_g1	0	0	0	0	0	Q6P5E4	UDP-glucose:glycoprotein glucosyltransferase 1 (UGT1) (EC 2.4.1.-) (UDP--Glc:glycoprotein glucosyltransferase) (UDP-glucose ceramide glucosyltransferase-like 1)	Uggt1	Gt	Ugcgl1	Uggt	Ugt1	Ugtr
TRINITY_DN11128_c1_g1	0	0	0	0	0	Q71U34	Heat shock cognate 71 kDa protein (Heat shock 70 kDa protein 8)	Hspa8	Hsc70	Hsc73
TRINITY_DN11110_c1_g2	0	0	0	0	0	Q5ZI33	Kelch-like protein 7	Klhl7
TRINITY_DN11784_c0_g1	0	0	0	0	0	Q96PQ7	Kelch-like protein 12 (CUL3-interacting protein 1)	Klhl12	C3ip1
TRINITY_DN123808_c0_g1	0	0	0	0	0	Q5U3U0	#N/A	#N/A
TRINITY_DN12384_c0_g1	0	0	0	0	0	Q2KIK3	Small integral membrane protein 14	Smim14
TRINITY_DN12384_c0_g2	0	0	0	0	0	Q2KIK3	Small integral membrane protein 14	Smim14
TRINITY_DN12392_c0_g1	0	0	0	0	0	Q17QH8	Epimerase family protein SDR39U1 (EC 1.1.1.-) (Short-chain dehydrogenase/reductase family 39U member 1)	Sdr39u1
TRINITY_DN123938_c0_g1	0	0	0	0	0	Q9HC84	Mucin-2 (MUC-2) (Colonic mucin) (MCM) (Secreted gel-forming mucin) (Fragments)	Muc2
TRINITY_DN12399_c0_g2	0	0	0	0	0	P20929	#N/A	#N/A
TRINITY_DN1240_c0_g1	0	0	0	0	0	A6QR44	Microprocessor complex subunit DGCR8 (DiGeorge syndrome critical region 8 homolog) (Gy1)	Dgcr8
TRINITY_DN12409_c0_g1	0	0	0	0	0	Q8NCX0	Coiled-coil domain-containing protein 150	Ccdc150
TRINITY_DN12420_c0_g1	0	0	0	0	0	Q53G59	#N/A	#N/A
TRINITY_DN12422_c0_g3	0	0	0	0	0	Q9JI74	Kelch-like protein 1	Klhl1
TRINITY_DN1243_c0_g1	0	0	0	0	0	P98110	P-selectin (CD62 antigen-like family member P) (Granule membrane protein 140) (GMP-140) (Leukocyte-endothelial cell adhesion molecule 3) (LECAM3) (Platelet activation dependent granule-external membrane protein) (PADGEM) (CD antigen CD62P)	Selp	Grmp
TRINITY_DN12433_c0_g1	0	0	0	0	0	Q5U2S3	Zinc finger-containing ubiquitin peptidase 1 (EC 3.4.19.12) (Lys-63-specific deubiquitinase ZUFSP) (DUB) (Zinc finger with UFM1-specific peptidase domain protein)	Zup1	Zufsp
TRINITY_DN12438_c0_g1	0	0	0	0	0	Q02742	Beta-1,3-galactosyl-O-glycosyl-glycoprotein beta-1,6-N-acetylglucosaminyltransferase (EC 2.4.1.102) (Core 2-branching enzyme) (Core2-GlcNAc-transferase) (C2GNT)	Gcnt1
TRINITY_DN12446_c0_g2	0	0	0	0	0	Q2WGJ6	Kelch-like protein 15	Klhl15
TRINITY_DN12450_c0_g1	0	0	0	0	0	O96006	Zinc finger BED domain-containing protein 4	Zbed4	Kiaa0637
TRINITY_DN12464_c1_g1	0	0	0	0	0	P21217	4-galactosyl-N-acetylglucosaminide 3-alpha-L-fucosyltransferase 9 (EC 2.4.1.152) (Fucosyltransferase 9) (Fucosyltransferase IX) (Fuc-TIX) (FucT-IX) (Galactoside 3-L-fucosyltransferase)	Fut9
TRINITY_DN12467_c0_g1	0	0	0	0	0	Q98SP7	Bardet-Biedl syndrome 2 protein homolog	Bbs2
TRINITY_DN124699_c0_g1	0	0	0	0	0	P19378	Heat shock cognate 71 kDa protein (Heat shock 70 kDa protein 8)	Hspa8	Hsc70	Hsc73
TRINITY_DN1247_c0_g3	0	0	0	0	0	Q90YI3	Methionine--tRNA ligase, mitochondrial (EC 6.1.1.10) (Methionyl-tRNA synthetase 2) (Mitochondrial methionyl-tRNA synthetase) (MtMetRS)	Mars2
TRINITY_DN12475_c1_g1	0	0	0	0	0	Q8NCE2	Myotubularin-related protein 14 (EC 3.1.3.-) (mJumpy)	Mtmr14
TRINITY_DN12479_c0_g2	0	0	0	0	0	P14381	LINE-1 retrotransposable element ORF2 protein (ORF2p) (Long interspersed element-1) (L1) (Retrovirus-related Pol polyprotein LINE-1) [Includes: Reverse transcriptase (EC 2.7.7.49); Endonuclease (EC 3.1.21.-)]	Pol	Gm17492
TRINITY_DN1248_c0_g1	0	0	0	0	0	Q8AXY6	Muscle, skeletal receptor tyrosine-protein kinase (EC 2.7.10.1) (Muscle-specific tyrosine-protein kinase receptor) (MuSK) (Muscle-specific kinase receptor)	Musk	Nsk2
TRINITY_DN124835_c0_g1	0	0	0	0	0	Q54IT3	Amine oxidase [flavin-containing] B (EC 1.4.3.4) (Monoamine oxidase type B) (MAO-B)	Maob
TRINITY_DN12487_c0_g1	0	0	0	0	0	A6QNK1	#N/A	#N/A
TRINITY_DN12495_c0_g2	0	0	0	0	0	Q4R6C2	Zinc finger protein OZF (Only zinc finger protein) (Zinc finger protein 146)	Znf146	Ozf	Zfp146
TRINITY_DN12514_c0_g1	0	0	0	0	0	Q5TAX3	Terminal uridylyltransferase 4 (TUTase 4) (EC 2.7.7.52) (Zinc finger CCHC domain-containing protein 11)	Tut4	Kiaa0191	Zcchc11
TRINITY_DN12514_c1_g1	0	0	0	0	0	B2RX14	Terminal uridylyltransferase 4 (TUTase 4) (EC 2.7.7.52) (Zinc finger CCHC domain-containing protein 11)	Tut4	Kiaa0191	Zcchc11
TRINITY_DN1252_c0_g1	0	0	0	0	0	O35648	Centrin-3	Cetn3	Cen3
TRINITY_DN12520_c0_g1	0	0	0	0	0	Q8R242	Di-N-acetylchitobiase (EC 3.2.1.-)	Ctbs
TRINITY_DN125238_c0_g1	0	0	0	0	0	P56517	Histone deacetylase 2 (HD2) (EC 3.5.1.98) (YY1 transcription factor-binding protein)	Hdac2	Yy1bp
TRINITY_DN1253_c0_g1	0	0	0	0	0	Q7ZUM8	Ubiquitin carboxyl-terminal hydrolase 49 (EC 3.4.19.12) (Deubiquitinating enzyme 49) (Ubiquitin thioesterase 49) (Ubiquitin-specific-processing protease 49)	Usp49
TRINITY_DN12084_c0_g1	0	0	0	0	0	Q8BZ47	Zinc finger protein 609	Znf609	Kiaa0295	Zfp609
TRINITY_DN12253_c1_g2	0	0	0	0	0	P53609	Geranylgeranyl transferase type-1 subunit beta (EC 2.5.1.59) (Geranylgeranyl transferase type I subunit beta) (GGTase-I-beta) (Type I protein geranyl-geranyltransferase subunit beta)	Pggt1b
TRINITY_DN12268_c0_g1	0	0	0	0	0	Q6P7K0	Carboxymethylenebutenolidase homolog (EC 3.1.-.-)	Cmbl
TRINITY_DN12279_c0_g1	0	0	0	0	0	O60341	Lysine-specific histone demethylase 1A (EC 1.14.99.66) (BRAF35-HDAC complex protein BHC110) (Flavin-containing amine oxidase domain-containing protein 2)	Kdm1a	Aof2	Kiaa0601	Lsd1
TRINITY_DN12295_c0_g1	0	0	0	0	0	Q63HN8	#N/A	#N/A
TRINITY_DN122962_c0_g1	0	0	0	0	0	Q61554	Fibrillin-1 [Cleaved into: Asprosin]	Fbn1	Fbn-1
TRINITY_DN12309_c0_g2	0	0	0	0	0	Q9EQY0	Serine/threonine-protein kinase/endoribonuclease IRE1 (Endoplasmic reticulum-to-nucleus signaling 1) (Inositol-requiring protein 1) (Ire1-alpha) (IRE1a) [Includes: Serine/threonine-protein kinase (EC 2.7.11.1); Endoribonuclease (EC 3.1.26.-)]	Ern1	Ire1
TRINITY_DN1232_c0_g1	0	0	0	0	0	Q9Y3I0	RNA-splicing ligase RtcB homolog (EC 6.5.1.8) (3'-phosphate/5'-hydroxy nucleic acid ligase) (Focal adhesion-associated protein) (FAAP)	Rtcb	D10Wsu52e
TRINITY_DN1232_c0_g2	0	0	0	0	0	Q6NZS4	RNA-splicing ligase RtcB homolog (EC 6.5.1.8) (3'-phosphate/5'-hydroxy nucleic acid ligase) (Focal adhesion-associated protein) (FAAP)	Rtcb	D10Wsu52e
TRINITY_DN123200_c0_g1	0	0	0	0	0	Q5THJ4	#N/A	#N/A
TRINITY_DN1233_c0_g1	0	0	0	0	0	C0HBB2	Glycosylated lysosomal membrane protein (Lysosomal protein NCU-G1)	Glmp
TRINITY_DN12342_c0_g1	0	0	0	0	0	O14880	Microsomal glutathione S-transferase 3 (Microsomal GST-3) (Glutathione peroxidase MGST3) (EC 1.11.1.-) (Microsomal glutathione S-transferase III) (Microsomal GST-III)	Mgst3
TRINITY_DN123425_c0_g1	0	0	0	0	0	P86239	Angiopoietin-4 (ANG-4) (Angiopoietin-3) (ANG-3)	Angpt4	Agpt4	Ang3
TRINITY_DN12343_c0_g1	0	0	0	0	0	E9Q555	E3 ubiquitin-protein ligase RNF213 (EC 2.3.2.27) (EC 3.6.4.-) (Mysterin) (RING finger protein 213) (RING-type E3 ubiquitin transferase RNF213)	Rnf213	Mystr
TRINITY_DN12099_c0_g1	0	0	0	0	0	O15439	Multidrug resistance-associated protein 1 (EC 7.6.2.2) (ATP-binding cassette sub-family C member 1) (Glutathione-S-conjugate-translocating ATPase ABCC1) (EC 7.6.2.3) (Leukotriene C(4) transporter) (LTC4 transporter)	Abcc1	Abcc1a	Abcc1b	Mdrap	Mrp
TRINITY_DN12105_c0_g1	0	0	0	0	0	Q9BX74	TM2 domain-containing protein 1 (Amyloid-beta-binding protein) (mBBP)	Tm2d1	Bbp
TRINITY_DN121189_c0_g1	0	0	0	0	0	Q9UEW3	Macrophage receptor MARCO (Macrophage receptor with collagenous structure)	Marco
TRINITY_DN12125_c0_g1	0	0	0	0	0	P42575	Caspase-2 (CASP-2) (EC 3.4.22.55) (Neural precursor cell expressed developmentally down-regulated protein 2) (NEDD-2) (Protease ICH-1) [Cleaved into: Caspase-2 subunit p18; Caspase-2 subunit p13; Caspase-2 subunit p12]	Casp2	Ich1	Nedd-2	Nedd2
TRINITY_DN121453_c0_g2	0	0	0	0	0	P79102	Cytochrome P450 3A13 (EC 1.14.14.1) (CYPIIIA13)	Cyp3a13	Cyp3a-13
TRINITY_DN1215_c0_g1	0	0	0	0	0	Q8TF01	Arginine/serine-rich protein PNISR (Serine/arginine-rich-splicing regulatory protein 130) (SRrp130) (Splicing factor, arginine/serine-rich 130) (Splicing factor, arginine/serine-rich 18)	Pnisr	Sfrs18	Srrp130
TRINITY_DN12156_c0_g2	0	0	0	0	0	Q04757	Alpha-crystallin B chain (Alpha(B)-crystallin) (P23)	Cryab	Crya2
TRINITY_DN12158_c0_g1	0	0	0	0	0	P10687	1-phosphatidylinositol 4,5-bisphosphate phosphodiesterase beta-1 (EC 3.1.4.11) (PLC-154) (Phosphoinositide phospholipase C-beta-1) (Phospholipase C-beta-1) (PLC-beta-1)	Plcb1	Plcb
TRINITY_DN12164_c0_g1	0	0	0	0	0	P97280	Inter-alpha-trypsin inhibitor heavy chain H3 (ITI heavy chain H3) (ITI-HC3) (Inter-alpha-inhibitor heavy chain 3)	Itih3
TRINITY_DN121786_c0_g1	0	0	0	0	0	Q63HN8	E3 ubiquitin-protein ligase RNF213 (EC 2.3.2.27) (EC 3.6.4.-) (Mysterin) (RING finger protein 213) (RING-type E3 ubiquitin transferase RNF213)	Rnf213	Mystr
TRINITY_DN121881_c0_g1	0	0	0	0	0	P70490	Lactadherin (MFGM) (Milk fat globule-EGF factor 8) (MFG-E8) (SED1) (Sperm surface protein SP47) (MP47)	Mfge8
TRINITY_DN12189_c0_g1	0	0	0	0	0	O08810	116 kDa U5 small nuclear ribonucleoprotein component (Elongation factor Tu GTP-binding domain-containing protein 2) (U5 snRNP-specific protein, 116 kDa) (U5-116 kDa)	Eftud2	Snrp116
TRINITY_DN12191_c1_g1	0	0	0	0	0	A0AAR7	Serine/threonine-protein kinase/endoribonuclease IRE1 (Endoplasmic reticulum-to-nucleus signaling 1) (Inositol-requiring protein 1) (Ire1-alpha) (IRE1a) [Includes: Serine/threonine-protein kinase (EC 2.7.11.1); Endoribonuclease (EC 3.1.26.-)]	Ern1	Ire1
TRINITY_DN12202_c0_g1	0	0	0	0	0	Q86WI3	#N/A	#N/A
TRINITY_DN1221_c0_g1	0	0	0	0	0	Q2KJC9	Alpha-aminoadipic semialdehyde dehydrogenase (Alpha-AASA dehydrogenase) (EC 1.2.1.31) (Aldehyde dehydrogenase family 7 member A1) (EC 1.2.1.3) (Antiquitin-1) (Betaine aldehyde dehydrogenase) (EC 1.2.1.8) (Delta1-piperideine-6-carboxylate dehydrogenase) (P6c dehydrogenase)	Aldh7a1	Ald7a1
TRINITY_DN122_c0_g1	0	0	0	0	0	Q9IA79	Bax inhibitor 1 (BI-1) (Testis-enhanced gene transcript protein) (Transmembrane BAX inhibitor motif-containing protein 6)	Tmbim6	Tegt
TRINITY_DN12127_c0_g1	0	0	0	0	0	Q98TA4	#N/A	#N/A
TRINITY_DN121288_c0_g1	0	0	0	0	0	Q62432	Mothers against decapentaplegic homolog 2 (MAD homolog 2) (Mothers against DPP homolog 2) (Mad-related protein 2) (mMad2) (SMAD family member 2) (SMAD 2) (Smad2)	Smad2	Madh2	Madr2
TRINITY_DN121293_c0_g1	0	0	0	0	0	O62640	Baculoviral IAP repeat-containing protein 3 (EC 2.3.2.27) (Cellular inhibitor of apoptosis 2) (C-IAP2) (Inhibitor of apoptosis protein 1) (mIAP1) (RING-type E3 ubiquitin transferase BIRC3)	Birc3
TRINITY_DN12131_c1_g1	0	0	0	0	0	Q8BYI9	Tenascin-R (TN-R) (Janusin) (Neural recognition molecule J1-160/180) (Restrictin)	Tnr
TRINITY_DN12227_c0_g1	0	0	0	0	0	Q8N539	Fibrinogen C domain-containing protein 1	Fibcd1
TRINITY_DN12227_c0_g2	0	0	0	0	0	A2AV25	Fibrinogen C domain-containing protein 1	Fibcd1
TRINITY_DN12135_c0_g1	0	0	0	0	0	Q5RBD6	Coiled-coil domain-containing protein 66	Ccdc66
TRINITY_DN12138_c0_g1	0	0	0	0	0	A2ASS6	Titin (EC 2.7.11.1) (Connectin)	Ttn
TRINITY_DN1254_c0_g1	0	0	0	0	0	Q9QWV4	Myeloid leukemia factor 1 (Hematopoietic lineage switch 7) (Myelodysplasia-myeloid leukemia factor 1)	Mlf1	Hls7
TRINITY_DN12544_c0_g1	0	0	0	0	0	Q5XHX2	#N/A	#N/A
TRINITY_DN125508_c0_g1	0	0	0	0	0	P10394	#N/A	#N/A
TRINITY_DN12551_c1_g1	0	0	0	0	0	Q8NHH9	Atlastin-2 (EC 3.6.5.-) (ADP-ribosylation factor-like protein 6-interacting protein 2) (ARL-6-interacting protein 2) (Aip-2)	Atl2	Arl6ip2
TRINITY_DN12559_c0_g1	0	0	0	0	0	A0A1B0GTW7	Leishmanolysin-like peptidase (EC 3.4.24.-)	Lmln
TRINITY_DN12564_c0_g1	0	0	0	0	0	E2IYB3	#N/A	#N/A
TRINITY_DN12577_c0_g1	0	0	0	0	0	P21328	#N/A	#N/A
TRINITY_DN125781_c0_g1	0	0	0	0	0	E1B932	#N/A	#N/A
TRINITY_DN12579_c1_g1	0	0	0	0	0	Q12901	Zinc finger protein Gfi-1 (Growth factor independent protein 1)	Gfi1	Gfi-1
TRINITY_DN11715_c0_g1	0	0	0	0	0	P0C6B8	#N/A	#N/A
TRINITY_DN11719_c0_g1	0	0	0	0	0	B2RX14	Terminal uridylyltransferase 4 (TUTase 4) (EC 2.7.7.52) (Zinc finger CCHC domain-containing protein 11)	Tut4	Kiaa0191	Zcchc11
TRINITY_DN11719_c0_g2	0	0	0	0	0	Q5TAX3	Terminal uridylyltransferase 4 (TUTase 4) (EC 2.7.7.52) (Zinc finger CCHC domain-containing protein 11)	Tut4	Kiaa0191	Zcchc11
TRINITY_DN11726_c0_g2	0	0	0	0	0	Q8N6M3	Fat storage-inducing transmembrane protein 2 (Fat-inducing protein 2)	Fitm2	Fit2
TRINITY_DN11743_c0_g1	0	0	0	0	0	Q8IY50	Putative thiamine transporter SLC35F3 (Solute carrier family 35 member F3)	Slc35f3
TRINITY_DN11751_c0_g1	0	0	0	0	0	Q5ZJP5	Fibronectin type-III domain-containing protein 3A	Fndc3a	D14Ertd453e	Fndc3	Kiaa0970
TRINITY_DN11755_c0_g1	0	0	0	0	0	Q9GQN5	Transcriptional regulator ATRX (EC 3.6.4.12) (ATP-dependent helicase ATRX) (HP1 alpha-interacting protein) (HP1-BP38 protein) (Heterochromatin protein 2) (X-linked nuclear protein)	Atrx	Hp1bp2	Xnp
TRINITY_DN12581_c0_g2	0	0	0	0	0	Q96QU8	Exportin-6 (Exp6) (Ran-binding protein 20)	Xpo6	Ranbp20
TRINITY_DN12588_c0_g1	0	0	0	0	0	Q1RM35	Cilia- and flagella-associated protein 36 (Coiled-coil domain-containing protein 104)	Cfap36	Ccdc104
TRINITY_DN12627_c0_g1	0	0	0	0	0	Q505G8	Zinc finger protein 827	Znf827	Zfp827
TRINITY_DN1263_c0_g1	0	0	0	0	0	Q3V0T4	Integrin alpha-D (CD antigen CD11d)	Itgad
TRINITY_DN12632_c1_g2	0	0	0	0	0	Q9WVR3	Phosphatidylinositol 3,4,5-trisphosphate 5-phosphatase 2 (EC 3.1.3.86) (AblSH3-binding protein) (Inositol polyphosphate phosphatase-like protein 1) (INPPL-1) (SH2 domain-containing inositol 5'-phosphatase 2) (SH2 domain-containing inositol phosphatase 2) (SHIP-2)	Inppl1	Ship2
TRINITY_DN1264_c0_g1	0	0	0	0	0	O88658	Kinesin-like protein KIF1B	Kif1b
TRINITY_DN12641_c0_g1	0	0	0	0	0	Q9NBX4	LINE-1 retrotransposable element ORF2 protein (ORF2p) (Long interspersed element-1) (L1) (Retrovirus-related Pol polyprotein LINE-1) [Includes: Reverse transcriptase (EC 2.7.7.49); Endonuclease (EC 3.1.21.-)]	Pol	Gm17492
TRINITY_DN126487_c0_g1	0	0	0	0	0	Q9NXS3	Kelch-like protein 28 (BTB/POZ domain-containing protein 5)	Klhl28	Btbd5
TRINITY_DN126498_c0_g1	0	0	0	0	0	A0A0R4IBK5	E3 ubiquitin-protein ligase RNF213 (EC 2.3.2.27) (EC 3.6.4.-) (Mysterin) (RING finger protein 213) (RING-type E3 ubiquitin transferase RNF213)	Rnf213	Mystr
TRINITY_DN126498_c0_g2	0	0	0	0	0	Q63HN8	E3 ubiquitin-protein ligase RNF213 (EC 2.3.2.27) (EC 3.6.4.-) (Mysterin) (RING finger protein 213) (RING-type E3 ubiquitin transferase RNF213)	Rnf213	Mystr
TRINITY_DN12650_c0_g1	0	0	0	0	0	A4IG59	WASH complex subunit 1 (WAS protein family homolog 1)	Washc1	Orf19	Wash	Wash1
TRINITY_DN12657_c0_g1	0	0	0	0	0	Q9HBK9	Arsenite methyltransferase (EC 2.1.1.137) (Methylarsonite methyltransferase) (S-adenosyl-L-methionine:arsenic(III) methyltransferase)	As3mt	Cyt19
TRINITY_DN12658_c0_g2	0	0	0	0	0	P70665	Sialate O-acetylesterase (EC 3.1.1.53) (Sialic acid-specific 9-O-acetylesterase) (Yolk sac protein 2) [Cleaved into: Sialate O-acetylesterase small subunit; Sialate O-acetylesterase large subunit]	Siae	Ysg2
TRINITY_DN12659_c0_g1	0	0	0	0	0	Q90578	Fatty-acid amide hydrolase 1 (EC 3.5.1.99) (Anandamide amidohydrolase 1) (Fatty acid ester hydrolase) (EC 3.1.1.-) (Oleamide hydrolase 1)	Faah	Faah1
TRINITY_DN126667_c0_g1	0	0	0	0	0	Q8R2H4	Kelch-like protein 12 (CUL3-interacting protein 1)	Klhl12	C3ip1
TRINITY_DN126676_c0_g1	0	0	0	0	0	Q8R4G0	Netrin-G1 (Laminet-1)	Ntng1	Kiaa0976	Lmnt1
TRINITY_DN12346_c0_g2	0	0	0	0	0	Q93YS4	Broad substrate specificity ATP-binding cassette transporter ABCG2 (EC 7.6.2.2) (ATP-binding cassette sub-family G member 2) (Breast cancer resistance protein 1 homolog) (Urate exporter) (CD antigen CD338)	Abcg2	Abcp	Bcrp1
TRINITY_DN1269_c0_g1	0	0	0	0	0	Q90321	Dual specificity mitogen-activated protein kinase kinase 1 (MAP kinase kinase 1) (MAPKK 1) (EC 2.7.12.2) (ERK activator kinase 1) (MAPK/ERK kinase 1) (MEK 1)	Map2k1	Mek1	Prkmk1
TRINITY_DN126916_c0_g1	0	0	0	0	0	P21329	#N/A	#N/A
TRINITY_DN12696_c0_g1	0	0	0	0	0	Q8IWG1	Dynein intermediate chain 2, axonemal (Axonemal dynein intermediate chain 2)	Dnai2	Dnaic2
TRINITY_DN12720_c0_g1	0	0	0	0	0	Q7Z401	DENN domain-containing protein 4C	Dennd4c
TRINITY_DN12723_c0_g1	0	0	0	0	0	Q63ZQ1	Septin-2 (Neural precursor cell expressed developmentally down-regulated protein 5) (NEDD-5)	Septin2	Nedd5	2002-09-01
TRINITY_DN1273_c0_g1	0	0	0	0	0	Q8BGT6	MICAL-like protein 1 (Molecule interacting with Rab13) (MIRab13)	Micall1	D15Mit260	Kiaa1668	Mirab13
TRINITY_DN127369_c0_g1	0	0	0	0	0	Q5R8X9	F-box/LRR-repeat protein 2 (F-box and leucine-rich repeat protein 2)	Fbxl2
TRINITY_DN1274_c0_g1	0	0	0	0	0	B5X186	Calumenin (Crocalbin)	Calu
TRINITY_DN12745_c0_g1	0	0	0	0	0	E7EYQ9	Transmembrane protein 216 (Thymus atrophy-related protein)	Tmem216
TRINITY_DN12760_c0_g2	0	0	0	0	0	Q8L7I0	#N/A	#N/A
TRINITY_DN12763_c0_g1	0	0	0	0	0	Q3UJZ3	Armadillo repeat-containing protein 7	Armc7
TRINITY_DN12765_c0_g1	0	0	0	0	0	Q9TUI8	Fatty-acid amide hydrolase 1 (EC 3.5.1.99) (Anandamide amidohydrolase 1) (Fatty acid ester hydrolase) (EC 3.1.1.-) (Oleamide hydrolase 1)	Faah	Faah1
TRINITY_DN12770_c0_g1	0	0	0	0	0	O93530	#N/A	#N/A
TRINITY_DN12782_c0_g1	0	0	0	0	0	Q9Z2E3	Serine/threonine-protein kinase/endoribonuclease IRE2 (Endoplasmic reticulum-to-nucleus signaling 2) (Inositol-requiring protein 2) (Ire1-beta) (IRE1b) (mIre1) [Includes: Serine/threonine-protein kinase (EC 2.7.11.1); Endoribonuclease (EC 3.1.26.-)]	Ern2	Ire2
TRINITY_DN12782_c0_g2	0	0	0	0	0	Q9EQY0	Serine/threonine-protein kinase/endoribonuclease IRE1 (Endoplasmic reticulum-to-nucleus signaling 1) (Inositol-requiring protein 1) (Ire1-alpha) (IRE1a) [Includes: Serine/threonine-protein kinase (EC 2.7.11.1); Endoribonuclease (EC 3.1.26.-)]	Ern1	Ire1
TRINITY_DN127847_c0_g1	0	0	0	0	0	Q28062	#N/A	#N/A
TRINITY_DN12786_c0_g1	0	0	0	0	0	Q8BIG4	F-box only protein 28	Fbxo28	D1Ertd578e	Kiaa0483
TRINITY_DN12806_c0_g1	0	0	0	0	0	P22105	Tenascin-R (TN-R) (Janusin) (Neural recognition molecule J1-160/180) (Restrictin)	Tnr
TRINITY_DN12833_c0_g2	0	0	0	0	0	O95490	#N/A	#N/A
TRINITY_DN12834_c0_g1	0	0	0	0	0	M0R8U1	Dynein heavy chain 5, axonemal (Axonemal beta dynein heavy chain 5) (mDNAH5) (Ciliary dynein heavy chain 5)	Dnah5	Dnahc5
TRINITY_DN12839_c0_g1	0	0	0	0	0	P05555	Integrin alpha-M (CD11 antigen-like family member B) (CR-3 alpha chain) (Cell surface glycoprotein MAC-1 subunit alpha) (Leukocyte adhesion receptor MO1) (CD antigen CD11b)	Itgam
TRINITY_DN12685_c1_g3	0	0	0	0	0	Q4V8U5	Anoctamin-10 (Transmembrane protein 16K)	Ano10	Tmem16k
TRINITY_DN12588_c0_g2	0	0	0	0	0	Q8C6E0	#N/A	#N/A
TRINITY_DN125953_c0_g1	0	0	0	0	0	P28568	Solute carrier family 2, facilitated glucose transporter member 7 (Glucose transporter type 7) (GLUT-7)	Slc2a7
TRINITY_DN12617_c0_g2	0	0	0	0	0	Q96DM1	#N/A	#N/A
TRINITY_DN12618_c0_g1	0	0	0	0	0	A3KMW7	#N/A	#N/A
TRINITY_DN126184_c1_g1	0	0	0	0	0	Q58D72	Atlastin-1 (EC 3.6.5.-) (Spastic paraplegia 3A homolog)	Atl1	Spg3a
TRINITY_DN11788_c0_g1	0	0	0	0	0	Q9H5L6	#N/A	#N/A
TRINITY_DN11789_c0_g1	0	0	0	0	0	Q8N328	#N/A	#N/A
TRINITY_DN11790_c0_g1	0	0	0	0	0	Q8VBT2	L-serine dehydratase/L-threonine deaminase (SDH) (EC 4.3.1.17) (L-serine deaminase) (L-threonine dehydratase) (TDH) (EC 4.3.1.19)	Sds
TRINITY_DN11793_c0_g1	0	0	0	0	0	Q8BI36	JNK1/MAPK8-associated membrane protein (JKAMP) (JNK1-associated membrane protein) (JAMP) (Medulloblastoma antigen MU-MB-50.4 homolog)	Jkamp	Jamp
TRINITY_DN111302_c0_g1	0	0	0	0	0	G5EDR5	#N/A	#N/A
TRINITY_DN1114_c0_g1	0	0	0	0	0	Q9Y548	Protein YIPF1 (YIP1 family member 1)	Yipf1
TRINITY_DN11112_c0_g2	0	0	0	0	0	P47800	#N/A	#N/A
TRINITY_DN11114_c0_g1	0	0	0	0	0	Q6ZWL3	Cytochrome P450 4V2 (Docosahexaenoic acid omega-hydroxylase CYP4V2) (EC 1.14.14.79) (Long-chain fatty acid omega-monooxygenase) (EC 1.14.14.80)	Cyp4v2	Cyp4v3
TRINITY_DN10587_c0_g1	0	0	0	0	0	D4A1R8	Copine-3 (Copine III)	Cpne3	Kiaa0636
TRINITY_DN10590_c3_g1	0	0	0	0	0	Q9NXS3	Actin-binding protein IPP (Intracisternal A particle-promoted polypeptide) (IPP) (Murine IAP-promoted placenta-expressed protein) (Protein MIPP)	Ipp	Mipp
TRINITY_DN10593_c0_g1	0	0	0	0	0	Q6PFL0	Mediator of RNA polymerase II transcription subunit 27 (Cofactor required for Sp1 transcriptional activation subunit 8) (CRSP complex subunit 8) (Mediator complex subunit 27)	Med27	Crsp8
TRINITY_DN10599_c0_g1	0	0	0	0	0	F1R4Y7	Centrosomal protein of 83 kDa (Cep83) (Coiled-coil domain-containing protein 41)	Cep83	Ccdc41
TRINITY_DN102611_c0_g1	0	0	0	0	0	Q8R151	NFX1-type zinc finger-containing protein 1	Znfx1
TRINITY_DN10265_c0_g1	0	0	0	0	0	Q9UJU3	Zinc finger protein 26 (Zfp-26) (Protein mKR3)	Zfp26	Kiaa4196	Mkr3	Zfp-26
TRINITY_DN10267_c0_g1	0	0	0	0	0	O15439	Multidrug resistance-associated protein 9 (ATP-binding cassette sub-family C member 12)	Abcc12	Mrp9
TRINITY_DN10127_c1_g1	0	0	0	0	0	Q96GS4	BLOC-1-related complex subunit 6	Borcs6
TRINITY_DN10006_c0_g1	0	0	0	0	0	Q5R4H0	Zinc transporter 9 (ZnT-9) (GRIP1-associated coactivator 63) (GAC63) (Solute carrier family 30 member 9)	Slc30a9
TRINITY_DN10134_c0_g1	0	0	0	0	0	Q6DKK2	Tetratricopeptide repeat protein 19, mitochondrial (TPR repeat protein 19)	Ttc19
TRINITY_DN10153_c0_g1	0	0	0	0	0	F4HYF3	#N/A	#N/A
TRINITY_DN1000_c0_g1	0	0	0	0	0	A2VDR8	Conserved oligomeric Golgi complex subunit 7 (COG complex subunit 7) (Component of oligomeric Golgi complex 7)	Cog7
TRINITY_DN130758_c0_g1	0	0	0	0	0	P10039	Fibrinogen C domain-containing protein 1	Fibcd1
TRINITY_DN13083_c0_g1	0	0	0	0	0	Q6PDJ1	VWFA and cache domain-containing protein 1 (Cache domain-containing protein 1)	Cachd1	Kiaa1573	Vwcd1
TRINITY_DN13088_c0_g1	0	0	0	0	0	P52799	Ephrin-A4 (EPH-related receptor tyrosine kinase ligand 4) (LERK-4)	Efna4	Epl4	Eplg4	Lerk4
TRINITY_DN13092_c0_g1	0	0	0	0	0	Q8IXF0	Neuronal PAS domain-containing protein 3 (Neuronal PAS3) (Basic-helix-loop-helix-PAS protein MOP6) (Member of PAS protein 6)	Npas3	Mop6
TRINITY_DN13093_c0_g2	0	0	0	0	0	Q53G59	Kelch-like protein 12 (CUL3-interacting protein 1)	Klhl12	C3ip1
TRINITY_DN13095_c0_g1	0	0	0	0	0	Q9Y2C2	Uronyl 2-sulfotransferase (EC 2.8.2.-)	Ust
TRINITY_DN13098_c0_g1	0	0	0	0	0	P50292	Arylamine N-acetyltransferase 2 (EC 2.3.1.5) (Arylamide acetylase 2) (N-acetyltransferase type 2) (NAT-2)	Nat2	Aac2
TRINITY_DN13102_c0_g1	0	0	0	0	0	Q8MU52	#N/A	#N/A
TRINITY_DN13106_c0_g1	0	0	0	0	0	P0C8L6	Pterin-4-alpha-carbinolamine dehydratase (PHS) (EC 4.2.1.96) (4-alpha-hydroxy-tetrahydropterin dehydratase) (Dimerization cofactor of hepatocyte nuclear factor 1-alpha) (DCoH) (Dimerization cofactor of HNF1) (Phenylalanine hydroxylase-stimulating protein) (Pterin carbinolamine dehydratase) (PCD)	Pcbd1	Dcoh	Pcbd
TRINITY_DN13118_c0_g1	0	0	0	0	0	Q96K78	Adhesion G protein-coupled receptor L3 (Latrophilin-3) (Lectomedin-3)	Adgrl3	Kiaa0768	Lec3	Lphn3
TRINITY_DN13119_c0_g1	0	0	0	0	0	O60260	E3 ubiquitin-protein ligase parkin (EC 2.3.2.31) (Parkin RBR E3 ubiquitin-protein ligase)	Prkn	Park2
TRINITY_DN131206_c0_g1	0	0	0	0	0	Q2EMV9	#N/A	#N/A
TRINITY_DN13128_c0_g1	0	0	0	0	0	Q6GLC5	ER membrane protein complex subunit 6 (Transmembrane protein 93)	Emc6	Tmem93
TRINITY_DN13128_c2_g1	0	0	0	0	0	Q8K2W3	Thioredoxin domain-containing protein 11	Txndc11
TRINITY_DN13129_c0_g1	0	0	0	0	0	B3EWZ3	Hemicentin-1 (Fibulin-6) (FIBL-6)	Hmcn1
TRINITY_DN13147_c0_g1	0	0	0	0	0	A3KPA3	N-alpha-acetyltransferase 60 (EC 2.3.1.259) (Histone acetyltransferase type B protein 4) (HAT4) (EC 2.3.1.48) (N-acetyltransferase 15) (N-alpha-acetyltransferase F) (NatF)	Naa60	Nat15
TRINITY_DN1315_c0_g1	0	0	0	0	0	Q80TG1	KAT8 regulatory NSL complex subunit 1 (NSL complex protein NSL1) (Non-specific lethal 1 homolog)	Kansl1	Kiaa1267	Nsl1
TRINITY_DN13163_c0_g1	0	0	0	0	0	P06795	ATP-dependent translocase ABCB1 (ATP-binding cassette sub-family B member 1B) (Multidrug resistance protein 1B) (EC 7.6.2.2) (P-glycoprotein 1) (Phospholipid transporter ABCB1) (EC 7.6.2.1) (CD antigen CD243)	Abcb1b	Abcb1	Mdr1	Mdr1b	Pgy1	Pgy1-1
TRINITY_DN13177_c0_g1	0	0	0	0	0	Q68EL2	D-aminoacyl-tRNA deacylase 2 (EC 3.1.1.96) (Animalia-specific tRNA deacylase) (ATD) (D-tyrosyl-tRNA deacylase 2) (L-alanyl-tRNA deacylase)	Dtd2
TRINITY_DN13186_c1_g1	0	0	0	0	0	Q61555	Fibrillin-2 [Cleaved into: Fibrillin-2 C-terminal peptide]	Fbn2	Fbn-2
TRINITY_DN13189_c0_g1	0	0	0	0	0	Q90YB1	DNA ligase 4 (EC 6.5.1.1) (DNA ligase IV) (Polydeoxyribonucleotide synthase [ATP] 4)	Lig4
TRINITY_DN13190_c0_g2	0	0	0	0	0	Q6PBM1	Glutaredoxin-related protein 5, mitochondrial (Monothiol glutaredoxin-5)	Glrx5
TRINITY_DN13194_c0_g1	0	0	0	0	0	A5D8R3	Transcription factor SOX-7 (mSOX7)	Sox7	Sox-7
TRINITY_DN13202_c0_g1	0	0	0	0	0	B5G1P1	Intraflagellar transport protein 43 homolog	Ift43
TRINITY_DN13209_c0_g1	0	0	0	0	0	Q6GNS1	Carbohydrate sulfotransferase 8 (EC 2.8.2.-) (GalNAc-4-O-sulfotransferase 1) (GalNAc-4-ST1) (GalNAc4ST-1) (N-acetylgalactosamine-4-O-sulfotransferase 1)	Chst8
TRINITY_DN1321_c0_g1	0	0	0	0	0	O17389	#N/A	#N/A
TRINITY_DN132106_c0_g1	0	0	0	0	0	Q5F349	Protein O-mannose kinase (POMK) (EC 2.7.1.183) (Protein kinase-like protein SgK196) (Sugen kinase 196)	Pomk	Sgk196
TRINITY_DN13211_c0_g1	0	0	0	0	0	Q9YH58	Formimidoyltransferase-cyclodeaminase (Formiminotransferase-cyclodeaminase) (FTCD) [Includes: Glutamate formimidoyltransferase (EC 2.1.2.5) (Glutamate formiminotransferase) (Glutamate formyltransferase); Formimidoyltetrahydrofolate cyclodeaminase (EC 4.3.1.4) (Formiminotetrahydrofolate cyclodeaminase)]	Ftcd
TRINITY_DN13213_c0_g1	0	0	0	0	0	Q7SYD9	Integrator complex subunit 6 (Int6) (DBI-1) (Protein DDX26)	Ints6	Dbi1	Ddx26
TRINITY_DN13213_c0_g2	0	0	0	0	0	Q2TAF4	Integrator complex subunit 6 (Int6) (DBI-1) (Protein DDX26)	Ints6	Dbi1	Ddx26
TRINITY_DN13217_c0_g1	0	0	0	0	0	Q9NS28	Regulator of G-protein signaling 8 (RGS8)	Rgs8
TRINITY_DN13225_c0_g1	0	0	0	0	0	Q8I7P9	#N/A	#N/A
TRINITY_DN13233_c0_g1	0	0	0	0	0	Q3T906	N-acetylglucosamine-1-phosphotransferase subunits alpha/beta (EC 2.7.8.17) (GlcNAc-1-phosphotransferase subunits alpha/beta) (Stealth protein GNPTAB) (UDP-N-acetylglucosamine-1-phosphotransferase subunits alpha/beta) [Cleaved into: N-acetylglucosamine-1-phosphotransferase subunit alpha; N-acetylglucosamine-1-phosphotransferase subunit beta]	Gnptab	Gnpta	Kiaa1208
TRINITY_DN13235_c0_g1	0	0	0	0	0	Q63HN8	#N/A	#N/A
TRINITY_DN132450_c0_g1	0	0	0	0	0	P21328	#N/A	#N/A
TRINITY_DN1326_c0_g1	0	0	0	0	0	O35286	Pre-mRNA-splicing factor ATP-dependent RNA helicase DHX15 (EC 3.6.4.13) (DEAH box protein 15)	Dhx15	Ddx15	Deah9
TRINITY_DN13267_c0_g1	0	0	0	0	0	Q58CS8	N-acetylglucosamine-1-phosphotransferase subunit gamma (GlcNAc-1-phosphotransferase subunit gamma) (M6PR domain-containing protein 1) (UDP-N-acetylglucosamine-1-phosphotransferase subunit gamma)	Gnptg	Mdcp1
TRINITY_DN13278_c0_g1	0	0	0	0	0	Q9DCM0	Persulfide dioxygenase ETHE1, mitochondrial (EC 1.13.11.18) (Ethylmalonic encephalopathy protein 1 homolog) (Hepatoma subtracted clone one protein) (Sulfur dioxygenase ETHE1)	Ethe1	Hsco
TRINITY_DN13289_c0_g1	0	0	0	0	0	A2VDP6	NXPE family member 4 (Protein FAM55D)	Nxpe4	Fam55d
TRINITY_DN1329_c0_g1	0	0	0	0	0	Q61037	Tuberin (Tuberous sclerosis 2 protein homolog)	Tsc2
TRINITY_DN13291_c1_g1	0	0	0	0	0	Q9Y2M2	Protein SSUH2 homolog (Protein ssu-2 homolog)	Ssuh2	Ssu2
TRINITY_DN13297_c0_g1	0	0	0	0	0	Q29RY7	#N/A	#N/A
TRINITY_DN1333_c0_g1	0	0	0	0	0	Q6P5F9	Exportin-1 (Exp1) (Chromosome region maintenance 1 protein homolog)	Xpo1	Crm1
TRINITY_DN13336_c0_g1	0	0	0	0	0	Q09225	O-acyltransferase like protein (Protein oacyl)	Oacyl
TRINITY_DN13340_c0_g1	0	0	0	0	0	F1RQM2	Phosphoacetylglucosamine mutase (PAGM) (EC 5.4.2.3) (Acetylglucosamine phosphomutase) (N-acetylglucosamine-phosphate mutase) (Phosphoglucomutase-3) (PGM 3)	Pgm3	Agm1	Pgm-3
TRINITY_DN13347_c0_g1	0	0	0	0	0	B5X165	Protein SMG9	Smg9
TRINITY_DN13349_c0_g1	0	0	0	0	0	P18433	Receptor-type tyrosine-protein phosphatase alpha (Protein-tyrosine phosphatase alpha) (R-PTP-alpha) (EC 3.1.3.48) (LCA-related phosphatase) (PTPTY-28)	Ptpra	Lrp	Ptpa
TRINITY_DN133510_c0_g1	0	0	0	0	0	P11503	Heat shock cognate 71 kDa protein (Heat shock 70 kDa protein 8)	Hspa8	Hsc70	Hsc73
TRINITY_DN13355_c1_g2	0	0	0	0	0	P10978	#N/A	#N/A
TRINITY_DN13355_c1_g3	0	0	0	0	0	P10978	#N/A	#N/A
TRINITY_DN1336_c0_g1	0	0	0	0	0	Q3T0E5	Adipocyte plasma membrane-associated protein (Protein DD16)	Apmap
TRINITY_DN13366_c0_g2	0	0	0	0	0	Q5R6D7	Ankyrin repeat and SOCS box protein 8 (ASB-8)	Asb8
TRINITY_DN13368_c0_g1	0	0	0	0	0	P26696	Mitogen-activated protein kinase 1 (MAP kinase 1) (MAPK 1) (EC 2.7.11.24) (ERT1) (Extracellular signal-regulated kinase 2) (ERK-2) (MAP kinase isoform p42) (p42-MAPK) (Mitogen-activated protein kinase 2) (MAP kinase 2) (MAPK 2)	Mapk1	Erk2	Mapk	Prkm1
TRINITY_DN1339_c0_g1	0	0	0	0	0	Q6AY20	Cation-dependent mannose-6-phosphate receptor (CD Man-6-P receptor) (CD-MPR) (46 kDa mannose 6-phosphate receptor) (MPR 46)	M6pr	46mpr
TRINITY_DN133960_c0_g3	0	0	0	0	0	Q76MJ5	#N/A	#N/A
TRINITY_DN134_c0_g1	0	0	0	0	0	Q13485	Mothers against decapentaplegic homolog 4 (MAD homolog 4) (Mothers against DPP homolog 4) (Deletion target in pancreatic carcinoma 4 homolog) (SMAD family member 4) (SMAD 4) (Smad4)	Smad4	Dpc4	Madh4
TRINITY_DN134032_c0_g1	0	0	0	0	0	Q60710	Deoxynucleoside triphosphate triphosphohydrolase SAMHD1 (dNTPase) (EC 3.1.5.-) (Interferon-gamma-inducible protein Mg11) (SAM domain and HD domain-containing protein 1) (mSAMHD1)	Samhd1	Mg21
TRINITY_DN134034_c0_g1	0	0	0	0	0	A2VE54	#N/A	#N/A
TRINITY_DN13404_c0_g1	0	0	0	0	0	Q9Z1Z2	Serine-threonine kinase receptor-associated protein (UNR-interacting protein)	Strap	Unrip
TRINITY_DN13416_c3_g2	0	0	0	0	0	Q5U374	Kelch-like protein 12 (CUL3-interacting protein 1)	Klhl12	C3ip1
TRINITY_DN13420_c1_g1	0	0	0	0	0	Q9NQR7	#N/A	#N/A
TRINITY_DN134241_c0_g2	0	0	0	0	0	P02750	Leucine-rich repeat and fibronectin type III domain-containing protein 1 (Synaptic adhesion-like molecule 2) (Synaptic differentiation-enhancing molecule 1)	Lrfn1	Salm2	Semo1
TRINITY_DN134269_c0_g2	0	0	0	0	0	Q52KR2	#N/A	#N/A
TRINITY_DN134281_c0_g1	0	0	0	0	0	P0CW97	#N/A	#N/A
TRINITY_DN13430_c0_g1	0	0	0	0	0	Q148G7	Dynactin subunit 6 (Dynactin subunit p27) (Protein WS-3)	Dctn6	Ws3
TRINITY_DN13431_c0_g1	0	0	0	0	0	P79110	Tricarboxylate transport protein, mitochondrial (Citrate transport protein) (CTP) (Solute carrier family 25 member 1) (Tricarboxylate carrier protein)	Slc25a1
TRINITY_DN13434_c0_g1	0	0	0	0	0	P0CF65	#N/A	#N/A
TRINITY_DN13454_c1_g1	0	0	0	0	0	Q5U374	Kelch-like protein 12 (CUL3-interacting protein 1)	Klhl12	C3ip1
TRINITY_DN13459_c0_g1	0	0	0	0	0	E7EY42	Phosphatidylserine synthase 2 (PSS-2) (PtdSer synthase 2) (EC 2.7.8.29) (Serine-exchange enzyme II)	Ptdss2	Pss2
TRINITY_DN1347_c0_g1	0	0	0	0	0	Q2VPU4	MLX-interacting protein (Transcriptional activator MondoA)	Mlxip	Mir
TRINITY_DN134844_c0_g1	0	0	0	0	0	Q6ZMW2	Zinc finger protein 583	Znf583	Zfp583
TRINITY_DN13508_c1_g2	0	0	0	0	0	Q05B56	General transcription factor IIH subunit 3 (Basic transcription factor 2 34 kDa subunit) (BTF2 p34) (General transcription factor IIH polypeptide 3) (TFIIH basal transcription factor complex p34 subunit)	Gtf2h3
TRINITY_DN13516_c0_g1	0	0	0	0	0	Q6DBY9	Carbohydrate sulfotransferase 1 (EC 2.8.2.21) (Galactose/N-acetylglucosamine/N-acetylglucosamine 6-O-sulfotransferase 1) (GST-1) (Keratan sulfate Gal-6 sulfotransferase) (KS6ST) (KSGal6ST) (KSST)	Chst1	Gst1
TRINITY_DN13534_c0_g1	0	0	0	0	0	Q8HY24	Solute carrier family 22 member 8 (Organic anion transporter 3) (mOat3) (Reduced in osteosclerosis transporter)	Slc22a8	Oat3	Roct
TRINITY_DN13535_c0_g1	0	0	0	0	0	Q64481	Cytochrome P450 3A16 (EC 1.14.14.1) (CYPIIIA16)	Cyp3a16	Cyp3a-16
TRINITY_DN13544_c0_g1	0	0	0	0	0	Q3V6T2	Girdin (Akt phosphorylation enhancer) (APE) (Coiled-coil domain-containing protein 88A) (G alpha-interacting vesicle-associated protein) (GIV) (Girders of actin filament) (Hook-related protein 1) (HkRP1)	Ccdc88a	Grdn	Kiaa1212
TRINITY_DN13571_c0_g1	0	0	0	0	0	Q9UKT5	#N/A	#N/A
TRINITY_DN13573_c0_g1	0	0	0	0	0	Q5ZJU0	Monocarboxylate transporter 9 (MCT 9) (Solute carrier family 16 member 9)	Slc16a9	Mct9
TRINITY_DN1358_c0_g1	0	0	0	0	0	Q5RDB5	Protein cornichon homolog 1 (CNIH-1) (Cornichon family AMPA receptor auxiliary protein 1) (Protein cornichon homolog)	Cnih1	Cnih
TRINITY_DN13589_c0_g1	0	0	0	0	0	Q28F89	Ubiquitin-conjugating enzyme E2 S (EC 2.3.2.23) (E2 ubiquitin-conjugating enzyme S) (Ubiquitin carrier protein S) (Ubiquitin-conjugating enzyme E2-24 kDa) (Ubiquitin-conjugating enzyme E2-EPF5) (Ubiquitin-protein ligase S)	Ube2s	E2epf
TRINITY_DN13612_c0_g1	0	0	0	0	0	P14781	#N/A	#N/A
TRINITY_DN13616_c0_g1	0	0	0	0	0	Q6GNS1	Carbohydrate sulfotransferase 10 (EC 2.8.2.-) (HNK-1 sulfotransferase) (HNK-1ST) (HNK1ST)	Chst10
TRINITY_DN13653_c0_g1	0	0	0	0	0	Q5R4M2	Serine/threonine-protein kinase ULK4 (EC 2.7.11.1) (Unc-51-like kinase 4)	Ulk4
TRINITY_DN13659_c0_g1	0	0	0	0	0	Q8WZ42	Titin (EC 2.7.11.1) (Connectin)	Ttn
TRINITY_DN13660_c0_g1	0	0	0	0	0	Q5RA52	[Pyruvate dehydrogenase [acetyl-transferring]]-phosphatase 1, mitochondrial (PDP 1) (EC 3.1.3.43) (Protein phosphatase 2C) (Pyruvate dehydrogenase phosphatase catalytic subunit 1) (PDPC 1)	Pdp1	Ppm2c
TRINITY_DN136854_c0_g1	0	0	0	0	0	Q01888	Graves disease carrier protein homolog (GDC) (Mitochondrial solute carrier protein homolog) (Solute carrier family 25 member 16)	Slc25a16	Gda
TRINITY_DN13689_c0_g1	0	0	0	0	0	P50146	Guanine nucleotide-binding protein G(i) subunit alpha-1 (Adenylate cyclase-inhibiting G alpha protein)	Gnai1	Gnai-1
TRINITY_DN13690_c1_g1	0	0	0	0	0	Q63HN8	E3 ubiquitin-protein ligase RNF213 (EC 2.3.2.27) (EC 3.6.4.-) (Mysterin) (RING finger protein 213) (RING-type E3 ubiquitin transferase RNF213)	Rnf213	Mystr
TRINITY_DN137_c0_g1	0	0	0	0	0	Q8N2M8	CLK4-associating serine/arginine rich protein (Clk4-associating SR-related protein) (Serine/arginine-rich splicing factor 16) (Splicing factor, arginine/serine-rich 16) (Suppressor of white-apricot homolog 2)	Clasrp	Clasp	Sfrs16	Srsf16	Swap2
TRINITY_DN1370_c0_g1	0	0	0	0	0	Q9Y490	Talin-1	Tln1	Tln
TRINITY_DN13703_c0_g1	0	0	0	0	0	O93209	#N/A	#N/A
TRINITY_DN1372_c0_g1	0	0	0	0	0	Q9D5T0	ATPase family AAA domain-containing protein 1 (EC 3.6.1.-) (Thorase)	Atad1
TRINITY_DN13724_c0_g1	0	0	0	0	0	Q92896	Golgi apparatus protein 1 (E-selectin ligand 1) (ESL-1) (Selel) (Golgi sialoglycoprotein MG-160)	Glg1	Esl1	Mg160	Selel
TRINITY_DN13739_c0_g1	0	0	0	0	0	Q6DEF6	Ferredoxin-fold anticodon-binding domain-containing protein 1 homolog (FDX-ACDB domain-containing protein 1)	Fdxacb1
TRINITY_DN13743_c0_g1	0	0	0	0	0	Q9NPF2	Carbohydrate sulfotransferase 11 (EC 2.8.2.5) (Chondroitin 4-O-sulfotransferase 1) (Chondroitin 4-sulfotransferase 1) (C4S-1) (C4ST-1) (C4ST1)	Chst11
TRINITY_DN137573_c0_g1	0	0	0	0	0	O93308	Structural maintenance of chromosomes protein 1A (SMC protein 1A) (SMC-1-alpha) (SMC-1A) (Chromosome segregation protein SmcB) (Sb1.8)	Smc1a	Sb1.8	Smc1	Smc1l1	Smcb
TRINITY_DN13762_c0_g1	0	0	0	0	0	O54983	Ketimine reductase mu-crystallin (EC 1.5.1.25) (NADP-regulated thyroid-hormone-binding protein)	Crym
TRINITY_DN13764_c0_g1	0	0	0	0	0	Q98TA4	#N/A	#N/A
TRINITY_DN13765_c0_g1	0	0	0	0	0	P18433	Receptor-type tyrosine-protein phosphatase epsilon (Protein-tyrosine phosphatase epsilon) (R-PTP-epsilon) (EC 3.1.3.48)	Ptpre	Ptpe
TRINITY_DN13771_c0_g1	0	0	0	0	0	Q559A2	#N/A	#N/A
TRINITY_DN13781_c0_g1	0	0	0	0	0	Q803G5	Sorting and assembly machinery component 50 homolog	Samm50
TRINITY_DN13782_c0_g1	0	0	0	0	0	Q99LR1	Lysophosphatidylserine lipase ABHD12 (EC 3.1.1.-) (2-arachidonoylglycerol hydrolase ABHD12) (Abhydrolase domain-containing protein 12) (Monoacylglycerol lipase ABHD12) (EC 3.1.1.23) (Oxidized phosphatidylserine lipase ABHD12) (EC 3.1.-.-)	Abhd12
TRINITY_DN137875_c0_g1	0	0	0	0	0	Q5R621	Heparan sulfate 2-O-sulfotransferase 1 (2-O-sulfotransferase) (2-OST) (2OST) (EC 2.8.2.-)	Hs2st1	Hs2st
TRINITY_DN13818_c0_g1	0	0	0	0	0	Q6UX07	Dehydrogenase/reductase SDR family member 13 (EC 1.1.-.-) (Short chain dehydrogenase/reductase family 7C member 5)	Dhrs13	Sdr7c5
TRINITY_DN1382_c0_g1	0	0	0	0	0	P49189	4-trimethylaminobutyraldehyde dehydrogenase (TMABA-DH) (TMABADH) (EC 1.2.1.47) (Aldehyde dehydrogenase family 9 member A1) (EC 1.2.1.3)	Aldh9a1
TRINITY_DN1383_c0_g1	0	0	0	0	0	Q9Y297	F-box/WD repeat-containing protein 11 (F-box and WD repeats protein beta-TrCP2) (F-box/WD repeat-containing protein 1B) (Homologous to Slimb protein) (HOS)	Fbxw11	Btrcp2	Fbw1b	Fbxw1b
TRINITY_DN13845_c0_g1	0	0	0	0	0	A6NK53	Zinc finger protein 628 (Zinc finger protein expressed in embryonal cells and certain adult organs)	Znf628	Zec	Zfp628
TRINITY_DN13846_c0_g1	0	0	0	0	0	Q497B0	Omega-amidase NIT2 (EC 3.5.1.3) (Nitrilase homolog 2)	Nit2	D16Ertd502e
TRINITY_DN13860_c0_g1	0	0	0	0	0	Q9TZH6	Pterin-4-alpha-carbinolamine dehydratase (PHS) (EC 4.2.1.96) (4-alpha-hydroxy-tetrahydropterin dehydratase) (Dimerization cofactor of hepatocyte nuclear factor 1-alpha) (DCoH) (Dimerization cofactor of HNF1) (Phenylalanine hydroxylase-stimulating protein) (Pterin carbinolamine dehydratase) (PCD)	Pcbd1	Dcoh	Pcbd
TRINITY_DN13879_c0_g1	0	0	0	0	0	Q6P7N4	Abasic site processing protein HMCES (Embryonic stem cell-specific 5-hydroxymethylcytosine-binding protein) (ES cell-specific 5hmC-binding protein) (Peptidase HMCES) (EC 3.4.-.-) (SRAP domain-containing protein 1)	Hmces	Srap1	Srapd1
TRINITY_DN13905_c0_g1	0	0	0	0	0	O14841	5-oxoprolinase (EC 3.5.2.9) (5-oxo-L-prolinase) (5-OPase) (Pyroglutamase)	Oplah
TRINITY_DN13906_c0_g1	0	0	0	0	0	D2YVK5	Collectin-10 (Collectin liver protein 1) (CL-L1)	Colec10	Cll1
TRINITY_DN1391_c0_g1	0	0	0	0	0	Q0VGW6	Solute carrier family 12 member 9 (Cation-chloride cotransporter-interacting protein 1) (Potassium-chloride transporter 9)	Slc12a9	Cip1	Slc12a8
TRINITY_DN13910_c0_g1	0	0	0	0	0	P11722	#N/A	#N/A
TRINITY_DN13914_c0_g1	0	0	0	0	0	Q24157	Beta-1,3-galactosyltransferase 4 (Beta-1,3-GalTase 4) (Beta3Gal-T4) (Beta3GalT4) (b3Gal-T4) (EC 2.4.1.62) (Gal-T2) (Ganglioside galactosyltransferase) (UDP-galactose:beta-N-acetyl-galactosamine-beta-1,3-galactosyltransferase)	B3galt4
TRINITY_DN13929_c0_g1	0	0	0	0	0	Q8K430	Kelch-like protein 17 (Actinfilin)	Klhl17
TRINITY_DN13936_c0_g1	0	0	0	0	0	Q4LDE5	Sushi, von Willebrand factor type A, EGF and pentraxin domain-containing protein 1 (Polydom)	Svep1
TRINITY_DN13938_c0_g1	0	0	0	0	0	Q5M969	N-acylneuraminate-9-phosphatase (EC 3.1.3.29) (Haloacid dehalogenase-like hydrolase domain-containing protein 4) (Neu5Ac-9-Pase)	Nanp	Hdhd4
TRINITY_DN13940_c0_g1	0	0	0	0	0	Q5XHZ6	Kelch-like protein 7	Klhl7
TRINITY_DN13941_c0_g1	0	0	0	0	0	Q96JM4	Leucine-rich repeat and IQ domain-containing protein 1	Lrriq1
TRINITY_DN13949_c1_g2	0	0	0	0	0	Q80WQ9	Zinc finger BED domain-containing protein 4	Zbed4	Kiaa0637
TRINITY_DN13951_c2_g1	0	0	0	0	0	Q99KD5	Protein unc-45 homolog A (Unc-45A) (Stromal membrane-associated protein 1) (SMAP-1)	Unc45a	Smap1
TRINITY_DN13964_c0_g1	0	0	0	0	0	Q8C120	#N/A	#N/A
TRINITY_DN13970_c0_g2	0	0	0	0	0	Q53B87	#N/A	#N/A
TRINITY_DN139712_c0_g1	0	0	0	0	0	P21956	Lactadherin (MFGM) (Milk fat globule-EGF factor 8) (MFG-E8) (SED1) (Sperm surface protein SP47) (MP47)	Mfge8
TRINITY_DN139763_c0_g1	0	0	0	0	0	Q5U374	Kelch-like protein 12 (CUL3-interacting protein 1)	Klhl12	C3ip1
TRINITY_DN13987_c0_g1	0	0	0	0	0	P27401	#N/A	#N/A
TRINITY_DN14001_c0_g1	0	0	0	0	0	Q5U374	Kelch-like protein 12 (CUL3-interacting protein 1)	Klhl12	C3ip1
TRINITY_DN14001_c1_g1	0	0	0	0	0	Q5U575	Kelch-like protein 11	Klhl11
TRINITY_DN140095_c0_g1	0	0	0	0	0	O19064	Tyrosine-protein kinase JAK2 (EC 2.7.10.2) (Janus kinase 2) (JAK-2)	Jak2
TRINITY_DN14022_c0_g1	0	0	0	0	0	P97479	Unconventional myosin-VIIa	Myo7a	Myo7
TRINITY_DN140303_c0_g3	0	0	0	0	0	Q9UH77	Kelch-like protein 3	Klhl3
TRINITY_DN14031_c0_g2	0	0	0	0	0	P48506	Glutamate--cysteine ligase catalytic subunit (EC 6.3.2.2) (GCS heavy chain) (Gamma-ECS) (Gamma-glutamylcysteine synthetase)	Gclc	Glclc
TRINITY_DN14044_c0_g1	0	0	0	0	0	Q6BEA2	Serine protease 27 (EC 3.4.21.-) (Marapsin) (Pancreasin)	Prss27	Mpn
TRINITY_DN14044_c0_g3	0	0	0	0	0	P98074	#N/A	#N/A
TRINITY_DN14045_c0_g1	0	0	0	0	0	P45380	Sulfate anion transporter 1 (SAT-1) (Solute carrier family 26 member 1)	Slc26a1	Sat1
TRINITY_DN1406_c1_g1	0	0	0	0	0	A5PKF5	#N/A	#N/A
TRINITY_DN14064_c0_g1	0	0	0	0	0	Q39101	#N/A	#N/A
TRINITY_DN14065_c0_g1	0	0	0	0	0	F1MBP6	Kelch-like protein 3	Klhl3
TRINITY_DN14073_c0_g1	0	0	0	0	0	Q8SQG7	Hyaluronidase-2 (Hyal-2) (EC 3.2.1.35) (Hyaluronoglucosaminidase-2)	Hyal2
TRINITY_DN14077_c0_g1	0	0	0	0	0	E9Q555	E3 ubiquitin-protein ligase RNF213 (EC 2.3.2.27) (EC 3.6.4.-) (Mysterin) (RING finger protein 213) (RING-type E3 ubiquitin transferase RNF213)	Rnf213	Mystr
TRINITY_DN14096_c0_g1	0	0	0	0	0	P59095	StAR-related lipid transfer protein 6 (START domain-containing protein 6) (StARD6)	Stard6
TRINITY_DN14102_c2_g1	0	0	0	0	0	Q5R9W8	Xaa-Pro aminopeptidase 3 (X-Pro aminopeptidase 3) (EC 3.4.11.9) (Aminopeptidase P3) (APP3)	Xpnpep3
TRINITY_DN14102_c2_g2	0	0	0	0	0	Q9NQH7	Xaa-Pro aminopeptidase 3 (X-Pro aminopeptidase 3) (EC 3.4.11.9) (Aminopeptidase P3) (APP3)	Xpnpep3
TRINITY_DN14132_c0_g1	0	0	0	0	0	Q5U374	Kelch-like protein 12 (CUL3-interacting protein 1)	Klhl12	C3ip1
TRINITY_DN14132_c1_g1	0	0	0	0	0	F1LZ52	Kelch-like protein 3	Klhl3
TRINITY_DN14138_c0_g1	0	0	0	0	0	Q66K08	Cartilage intermediate layer protein 1 (CILP-1) [Cleaved into: Cartilage intermediate layer protein 1 C1; Cartilage intermediate layer protein 1 C2]	Cilp
TRINITY_DN14141_c0_g1	0	0	0	0	0	Q9H5L6	#N/A	#N/A
TRINITY_DN14143_c0_g1	0	0	0	0	0	P70490	Lactadherin (MFGM) (Milk fat globule-EGF factor 8) (MFG-E8) (SED1) (Sperm surface protein SP47) (MP47)	Mfge8
TRINITY_DN1415_c0_g1	0	0	0	0	0	Q6DBU5	Mannose-1-phosphate guanyltransferase beta (EC 2.7.7.13) (GDP-mannose pyrophosphorylase B) (GTP-mannose-1-phosphate guanylyltransferase beta)	Gmppb
TRINITY_DN14153_c0_g1	0	0	0	0	0	P10073	Zinc finger protein 287 (Zfp-287) (Zinc finger protein SKAT-2)	Znf287	Skat2	Zfp287
TRINITY_DN141650_c0_g1	0	0	0	0	0	Q8TBH0	Arrestin domain-containing protein 3	Arrdc3	Kiaa1376
TRINITY_DN14168_c0_g1	0	0	0	0	0	Q91ZF0	DnaJ homolog subfamily C member 24 (CSL-type zinc finger-containing protein 3) (Diphthamide biosynthesis protein 4) (J domain protein DjC7)	Dnajc24	Dph4	Zcsl3
TRINITY_DN14169_c0_g1	0	0	0	0	0	Q9WVA4	Transgelin-2 (SM22-beta)	Tagln2	Kiaa0120
TRINITY_DN14176_c0_g1	0	0	0	0	0	Q28740	Basigin (Basic immunoglobulin superfamily) (HT7 antigen) (Membrane glycoprotein gp42) (CD antigen CD147)	Bsg
TRINITY_DN14177_c0_g1	0	0	0	0	0	Q3ZBG9	Phospholipid scramblase 1 (PL scramblase 1) (Ca(2+)-dependent phospholipid scramblase 1) (Transplantability-associated protein 1) (NOR1) (TRA1)	Plscr1	Tra1b	Tras1
TRINITY_DN14184_c0_g1	0	0	0	0	0	Q99L04	Dehydrogenase/reductase SDR family member 1 (EC 1.1.-.-)	Dhrs1	D14ertd484e
TRINITY_DN14192_c0_g1	0	0	0	0	0	Q91WF7	Polyphosphoinositide phosphatase (EC 3.1.3.-) (Phosphatidylinositol 3,5-bisphosphate 5-phosphatase) (SAC domain-containing protein 3)	Fig4	Kiaa0274	Sac3
TRINITY_DN141951_c0_g1	0	0	0	0	0	Q96RW7	Hemicentin-1 (Fibulin-6) (FIBL-6)	Hmcn1
TRINITY_DN14199_c0_g1	0	0	0	0	0	Q7ZWM6	Obg-like ATPase 1 (GTP-binding protein 9)	Ola1	Gtpbp9
TRINITY_DN14211_c0_g1	0	0	0	0	0	P59326	YTH domain-containing family protein 1 (Dermatomyositis associated with cancer putative autoantigen 1 homolog) (DACA-1 homolog)	Ythdf1
TRINITY_DN14219_c0_g1	0	0	0	0	0	G3MZR2	Alpha-(1,3)-fucosyltransferase 7 (EC 2.4.1.-) (Fucosyltransferase 7) (Fucosyltransferase VII) (Fuc-TVII) (FucT-VII) (Galactoside 3-L-fucosyltransferase)	Fut7
TRINITY_DN14221_c0_g1	0	0	0	0	0	Q6TFL4	Kelch-like protein 24 (Kainate receptor-interacting protein for GluR6) (KRIP6)	Klhl24
TRINITY_DN142298_c0_g1	0	0	0	0	0	Q42524	#N/A	#N/A
TRINITY_DN142306_c0_g1	0	0	0	0	0	Q9WVH6	#N/A	#N/A
TRINITY_DN14250_c0_g1	0	0	0	0	0	B0BM95	#N/A	#N/A
TRINITY_DN14253_c0_g1	0	0	0	0	0	Q9SPK4	Dual specificity protein kinase TTK (EC 2.7.12.1) (ESK) (PYT)	Ttk	Esk
TRINITY_DN14256_c0_g1	0	0	0	0	0	A0A0R4IBK5	#N/A	#N/A
TRINITY_DN14256_c1_g1	0	0	0	0	0	A0A0R4IBK5	E3 ubiquitin-protein ligase RNF213 (EC 2.3.2.27) (EC 3.6.4.-) (Mysterin) (RING finger protein 213) (RING-type E3 ubiquitin transferase RNF213)	Rnf213	Mystr
TRINITY_DN142603_c0_g1	0	0	0	0	0	Q99447	Ethanolamine-phosphate cytidylyltransferase (EC 2.7.7.14) (CTP:phosphoethanolamine cytidylyltransferase) (Phosphorylethanolamine transferase)	Pcyt2
TRINITY_DN14274_c0_g1	0	0	0	0	0	Q5RFP4	Zinc finger protein OZF (Only zinc finger protein) (Zinc finger protein 146)	Znf146	Ozf	Zfp146
TRINITY_DN14289_c0_g1	0	0	0	0	0	Q99M75	Reticulon-4 receptor (Nogo receptor) (NgR) (Nogo-66 receptor) (Nogo66 receptor-1) (NgR1)	Rtn4r	Ngr1	Nogor
TRINITY_DN14299_c0_g2	0	0	0	0	0	O60290	#N/A	#N/A
TRINITY_DN1430_c0_g1	0	0	0	0	0	Q8HYJ3	4-galactosyl-N-acetylglucosaminide 3-alpha-L-fucosyltransferase 9 (EC 2.4.1.152) (Fucosyltransferase 9) (Fucosyltransferase IX) (Fuc-TIX) (FucT-IX) (Galactoside 3-L-fucosyltransferase)	Fut9
TRINITY_DN143097_c0_g1	0	0	0	0	0	O43422	52 kDa repressor of the inhibitor of the protein kinase (p52rIPK) (58 kDa interferon-induced protein kinase-interacting protein) (p58IPK-interacting protein) (THAP domain-containing protein 0) (THAP domain-containing protein 12)	Thap12	Prkrir	Thap0
TRINITY_DN14312_c0_g1	0	0	0	0	0	Q86WA9	Sodium-independent sulfate anion transporter (Solute carrier family 26 member 11)	Slc26a11
TRINITY_DN14333_c0_g1	0	0	0	0	0	Q8QGX4	DNA-dependent protein kinase catalytic subunit (DNA-PK catalytic subunit) (DNA-PKcs) (EC 2.7.11.1) (p460)	Prkdc	Xrcc7
TRINITY_DN14370_c0_g1	0	0	0	0	0	B5XBI1	Intraflagellar transport protein 43 homolog	Ift43
TRINITY_DN14376_c0_g1	0	0	0	0	0	A9ULZ2	Baculoviral IAP repeat-containing protein 3 (EC 2.3.2.27) (Cellular inhibitor of apoptosis 2) (C-IAP2) (Inhibitor of apoptosis protein 1) (mIAP1) (RING-type E3 ubiquitin transferase BIRC3)	Birc3
TRINITY_DN14408_c0_g1	0	0	0	0	0	Q29467	#N/A	#N/A
TRINITY_DN14409_c0_g1	0	0	0	0	0	P25867	Ubiquitin-conjugating enzyme E2 D2 (EC 2.3.2.23) ((E3-independent) E2 ubiquitin-conjugating enzyme D2) (EC 2.3.2.24) (E2 ubiquitin-conjugating enzyme D2) (Ubiquitin carrier protein D2) (Ubiquitin-conjugating enzyme E2(17)KB 2) (Ubiquitin-conjugating enzyme E2-17 kDa 2) (Ubiquitin-protein ligase D2)	Ube2d2	Ubc4	Ubch4	Ubch5b	Ube2d2a
TRINITY_DN14416_c0_g1	0	0	0	0	0	Q5RAS0	Short-chain specific acyl-CoA dehydrogenase, mitochondrial (SCAD) (EC 1.3.8.1) (Butyryl-CoA dehydrogenase)	Acads
TRINITY_DN1442_c0_g1	0	0	0	0	0	D2H0Y8	E3 ubiquitin-protein ligase RNF146 (EC 2.3.2.27) (Iduna) (RING finger protein 146) (RING-type E3 ubiquitin transferase RNF146)	Rnf146
TRINITY_DN1442_c0_g2	0	0	0	0	0	D2H0Y8	E3 ubiquitin-protein ligase RNF146 (EC 2.3.2.27) (Iduna) (RING finger protein 146) (RING-type E3 ubiquitin transferase RNF146)	Rnf146
TRINITY_DN14421_c0_g2	0	0	0	0	0	B5FXE5	Ferroptosis suppressor protein 1 (FSP1) (EC 1.6.5.-) (Apoptosis-inducing factor homologous mitochondrion-associated inducer of death) (AMID) (p53-responsive gene 3 protein)	Aifm2	Amid
TRINITY_DN14430_c0_g1	0	0	0	0	0	Q9EPQ8	Transcription factor 20 (TCF-20) (Nuclear factor SPBP) (Stromelysin-1 PDGF-responsive element-binding protein) (SPRE-binding protein)	Tcf20	Spbp
TRINITY_DN144301_c0_g1	0	0	0	0	0	P04323	#N/A	#N/A
TRINITY_DN1444_c0_g1	0	0	0	0	0	Q13393	Phospholipase D1 (PLD 1) (mPLD1) (EC 3.1.4.4) (Choline phosphatase 1) (Phosphatidylcholine-hydrolyzing phospholipase D1)	Pld1
TRINITY_DN14443_c0_g1	0	0	0	0	0	Q53G59	Kelch-like protein 12 (CUL3-interacting protein 1)	Klhl12	C3ip1
TRINITY_DN14445_c0_g1	0	0	0	0	0	Q6NZJ6	Eukaryotic translation initiation factor 4 gamma 1 (eIF-4-gamma 1) (eIF-4G 1) (eIF-4G1)	Eif4g1
TRINITY_DN144587_c0_g1	0	0	0	0	0	Q8HY02	C-type lectin domain family 4 member E (C-type lectin superfamily member 9) (Macrophage-inducible C-type lectin) (Mincle)	Clec4e	Clecsf9	Mincle
TRINITY_DN14488_c0_g2	0	0	0	0	0	O14657	Torsin-1B (Torsin ATPase-1B) (EC 3.6.4.-) (Torsin family 1 member B)	Tor1b
TRINITY_DN14490_c0_g1	0	0	0	0	0	Q9CQA9	Cancer-related nucleoside-triphosphatase homolog (NTPase) (EC 3.6.1.15) (Nucleoside triphosphate phosphohydrolase)	Ntpcr
TRINITY_DN14492_c0_g2	0	0	0	0	0	P43687	Homeobox protein HMX2 (Homeobox protein Nkx-5.2)	Hmx2	Nkx-5.2	Nkx5-2
TRINITY_DN144985_c0_g1	0	0	0	0	0	Q8N0W5	#N/A	#N/A
TRINITY_DN14503_c0_g2	0	0	0	0	0	A1E2V0	Baculoviral IAP repeat-containing protein 2 (EC 2.3.2.27) (Cellular inhibitor of apoptosis 1) (C-IAP1) (Inhibitor of apoptosis protein 2) (mIAP2) (RING-type E3 ubiquitin transferase BIRC2)	Birc2
TRINITY_DN14514_c0_g1	0	0	0	0	0	Q8I7P9	Retrotransposon-like protein 1 (Mammalian retrotransposon derived protein 1) (Paternally expressed gene 11 protein) (Retrotransposon-derived protein PEG11)	Rtl1	2001-03-01	Mart1	Peg11
TRINITY_DN14520_c1_g1	0	0	0	0	0	Q5U374	Kelch-like protein 12 (CUL3-interacting protein 1)	Klhl12	C3ip1
TRINITY_DN14527_c0_g1	0	0	0	0	0	Q5GH73	XK-related protein 6	Xkr6
TRINITY_DN145338_c0_g1	0	0	0	0	0	Q9C5S2	Serine/threonine-protein kinase/endoribonuclease IRE1 (Endoplasmic reticulum-to-nucleus signaling 1) (Inositol-requiring protein 1) (Ire1-alpha) (IRE1a) [Includes: Serine/threonine-protein kinase (EC 2.7.11.1); Endoribonuclease (EC 3.1.26.-)]	Ern1	Ire1
TRINITY_DN14538_c0_g1	0	0	0	0	0	E9PY46	Intraflagellar transport protein 140 homolog (WD and tetratricopeptide repeats protein 2)	Ift140	WDTC2
TRINITY_DN14542_c0_g1	0	0	0	0	0	Q6P7K0	Carboxymethylenebutenolidase homolog (EC 3.1.-.-)	Cmbl
TRINITY_DN1456_c4_g1	0	0	0	0	0	Q9CXC3	Mitochondrial genome maintenance exonuclease 1 (EC 3.1.-.-)	Mgme1
TRINITY_DN14578_c0_g1	0	0	0	0	0	Q96P20	NACHT, LRR and PYD domains-containing protein 12 (Monarch-1) (PYRIN-containing APAF1-like protein 7) (PYPAF7)	Nlrp12	NALP12
TRINITY_DN14581_c0_g1	0	0	0	0	0	Q91559	5-hydroxytryptamine receptor 7 (5-HT-7) (5-HT7) (5-HT-X) (Serotonin receptor 7)	Htr7
TRINITY_DN14583_c0_g1	0	0	0	0	0	Q8NEP7	Kelch domain-containing protein 9	Klhdc9
TRINITY_DN14590_c0_g1	0	0	0	0	0	Q9Y4B5	#N/A	#N/A
TRINITY_DN1460_c2_g1	0	0	0	0	0	P27041	Activin receptor type-2B (EC 2.7.11.30) (Activin receptor type IIB) (ACTR-IIB)	Acvr2b
TRINITY_DN1460_c4_g1	0	0	0	0	0	Q92804	RNA-binding protein EWS	Ewsr1	Ews	Ewsh
TRINITY_DN1461_c1_g1	0	0	0	0	0	Q12872	Splicing factor, suppressor of white-apricot homolog (Splicing factor, arginine/serine-rich 8) (Suppressor of white apricot protein homolog)	Sfswap	Sfrs8	Srsf8	Swap
TRINITY_DN1461_c2_g1	0	0	0	0	0	A0JPE9	Putative glycerol kinase 5 (GK 5) (Glycerokinase 5) (EC 2.7.1.30) (ATP:glycerol 3-phosphotransferase 5)	Gk5
TRINITY_DN14612_c0_g1	0	0	0	0	0	Q7M3K2	#N/A	#N/A
TRINITY_DN14615_c0_g1	0	0	0	0	0	Q7XJE6	#N/A	#N/A
TRINITY_DN14631_c0_g1	0	0	0	0	0	Q95LU3	Fibrinogen C domain-containing protein 1	Fibcd1
TRINITY_DN146345_c0_g1	0	0	0	0	0	Q9R0S5	#N/A	#N/A
TRINITY_DN1464_c0_g1	0	0	0	0	0	Q13148	TAR DNA-binding protein 43 (TDP-43)	Tardbp	Tdp43
TRINITY_DN14652_c0_g1	0	0	0	0	0	Q5RBN9	Transcriptional adapter 2-alpha (Transcriptional adapter 2-like) (ADA2-like protein)	Tada2a	Tada2l
TRINITY_DN14672_c0_g1	0	0	0	0	0	Q8R2H4	#N/A	#N/A
TRINITY_DN146747_c0_g1	0	0	0	0	0	P50429	Arylsulfatase B (ASB) (EC 3.1.6.12) (N-acetylgalactosamine-4-sulfatase) (G4S)	Arsb	As1	As1-s
TRINITY_DN14686_c0_g1	0	0	0	0	0	A7X3Z0	#N/A	#N/A
TRINITY_DN14692_c0_g1	0	0	0	0	0	P0DSP1	Sortilin-related receptor (Gp250) (Low-density lipoprotein receptor relative with 11 ligand-binding repeats) (LDLR relative with 11 ligand-binding repeats) (LR11) (SorLA-1) (Sorting protein-related receptor containing LDLR class A repeats) (mSorLA)	Sorl1
TRINITY_DN14696_c0_g1	0	0	0	0	0	A6QLU6	Adhesion G-protein coupled receptor G2 (G-protein coupled receptor 64) (Mouse epididymis-specific protein 6) (Me6)	Adgrg2	Gpr64	Me6
TRINITY_DN1470_c0_g1	0	0	0	0	0	P46825	Kinesin light chain 1 (KLC 1)	Klc1	Kns2
TRINITY_DN14703_c0_g1	0	0	0	0	0	Q9HAR2	Adhesion G-protein coupled receptor G4 (G-protein coupled receptor 112)	Adgrg4	Gpr112
TRINITY_DN14704_c0_g1	0	0	0	0	0	Q6TFL4	Kelch-like protein 24 (Kainate receptor-interacting protein for GluR6) (KRIP6)	Klhl24
TRINITY_DN14755_c0_g1	0	0	0	0	0	O54689	C-C chemokine receptor type 6 (C-C CKR-6) (CC-CKR-6) (CCR-6) (KY411) (CD antigen CD196)	Ccr6	Cmkbr6
TRINITY_DN14760_c0_g1	0	0	0	0	0	O35671	Integrin beta-1-binding protein 1 (Bodenin)	Itgb1bp1
TRINITY_DN14762_c0_g1	0	0	0	0	0	Q6P2Q9	Pre-mRNA-processing-splicing factor 8 (Splicing factor Prp8)	Prpf8	Prp8
TRINITY_DN14769_c0_g1	0	0	0	0	0	Q96E09	Protein FAM122A	Fam122a
TRINITY_DN1477_c0_g1	0	0	0	0	0	Q9CQY5	Magnesium transporter protein 1 (MagT1) (Dolichyl-diphosphooligosaccharide--protein glycosyltransferase subunit MAGT1) (Oligosaccharyl transferase subunit MAGT1) (Implantation-associated protein) (IAP)	Magt1	Iag2
TRINITY_DN14773_c0_g1	0	0	0	0	0	Q05793	Basement membrane-specific heparan sulfate proteoglycan core protein (HSPG) [Cleaved into: Endorepellin; LG3 peptide]	Hspg2
TRINITY_DN1478_c0_g2	0	0	0	0	0	P24392	Peroxisome biogenesis factor 2 (Peroxin-2) (Peroxisomal membrane protein 3) (Peroxisome assembly factor 1) (PAF-1)	Pex2	Paf1	Pmp35	Pxmp3
TRINITY_DN14791_c0_g1	0	0	0	0	0	Q8K430	Kelch-like protein 17 (Actinfilin)	Klhl17
TRINITY_DN147994_c0_g1	0	0	0	0	0	A0A0R4IBK5	E3 ubiquitin-protein ligase RNF213 (EC 2.3.2.27) (EC 3.6.4.-) (Mysterin) (RING finger protein 213) (RING-type E3 ubiquitin transferase RNF213)	Rnf213	Mystr
TRINITY_DN14812_c0_g1	0	0	0	0	0	Q8IV42	L-seryl-tRNA(Sec) kinase (EC 2.7.1.164) (O-phosphoseryl-tRNA(Sec) kinase)	Pstk
TRINITY_DN14819_c0_g2	0	0	0	0	0	B2RR83	3'-5' RNA helicase YTHDC2 (EC 3.6.4.13) (Keen to exit meiosis leaving testes under-populated protein) (Ketu) (YTH domain-containing protein C2) (mYTHDC2)	Ythdc2
TRINITY_DN1482_c0_g1	0	0	0	0	0	A3KPW9	Large proline-rich protein BAG6 (BAG family molecular chaperone regulator 6) (BCL2-associated athanogene 6) (BAG-6) (HLA-B-associated transcript 3) (Protein Scythe)	Bag6	Bat3
TRINITY_DN14823_c1_g1	0	0	0	0	0	P16109	#N/A	#N/A
TRINITY_DN14837_c0_g1	0	0	0	0	0	Q9NXS3	Kelch-like protein 28 (BTB/POZ domain-containing protein 5)	Klhl28	Btbd5
TRINITY_DN148378_c0_g1	0	0	0	0	0	Q8AXY5	Cytochrome P450 3A11 (EC 1.14.14.1) (CYPIIIA11) (Cytochrome P-450IIIAM1) (Cytochrome P-450UT)	Cyp3a11	Cyp3a-11
TRINITY_DN1485_c0_g2	0	0	0	0	0	Q6P6S9	Ectonucleoside triphosphate diphosphohydrolase 5 (NTPDase 5) (EC 3.6.1.6) (CD39 antigen-like 4) (ER-UDPase) (Guanosine-diphosphatase ENTPD5) (GDPase ENTPD5) (EC 3.6.1.42) (Nucleoside diphosphatase) (Uridine-diphosphatase ENTPD5) (UDPase ENTPD5)	Entpd5	Cd39l4
TRINITY_DN14850_c0_g1	0	0	0	0	0	Q9NNZ3	DnaJ homolog subfamily C member 4 (Multiple endocrine neoplasia type 1 candidate protein number 18 homolog)	Dnajc4	Mcg18
TRINITY_DN14854_c0_g1	0	0	0	0	0	Q9HCU5	Prolactin regulatory element-binding protein (Mammalian guanine nucleotide exchange factor mSec12)	Preb	Sec12
TRINITY_DN14860_c0_g1	0	0	0	0	0	Q1JPA0	Aldehyde dehydrogenase family 3 member B1 (EC 1.2.1.28) (EC 1.2.1.5) (EC 1.2.1.7) (Aldehyde dehydrogenase 7)	Aldh3b1	Aldh7
TRINITY_DN148776_c0_g1	0	0	0	0	0	Q8BZ39	#N/A	#N/A
TRINITY_DN14883_c0_g1	0	0	0	0	0	Q92734	#N/A	#N/A
TRINITY_DN14887_c0_g1	0	0	0	0	0	Q90660	Baculoviral IAP repeat-containing protein 2 (EC 2.3.2.27) (Cellular inhibitor of apoptosis 1) (C-IAP1) (Inhibitor of apoptosis protein 2) (mIAP2) (RING-type E3 ubiquitin transferase BIRC2)	Birc2
TRINITY_DN14893_c0_g1	0	0	0	0	0	Q7L1T6	Cytochrome b5 reductase 4 (EC 1.6.2.2) (Flavohemoprotein b5/b5R) (b5+b5R) (N-terminal cytochrome b5 and cytochrome b5 oxidoreductase domain-containing protein) (cb5/cb5R)	Cyb5r4	Ncb5or
TRINITY_DN14897_c1_g2	0	0	0	0	0	P0DPU6	Glutathione hydrolase 1 proenzyme (EC 3.4.19.13) (Gamma-glutamyltransferase 1) (Gamma-glutamyltranspeptidase 1) (GGT 1) (EC 2.3.2.2) (Leukotriene-C4 hydrolase) (EC 3.4.19.14) (CD antigen CD224) [Cleaved into: Glutathione hydrolase 1 heavy chain; Glutathione hydrolase 1 light chain]	Ggt1	Ggt	Ggtp
TRINITY_DN148974_c0_g1	0	0	0	0	0	Q4KLL4	Transmembrane 9 superfamily member 4	Tm9sf4	Kiaa0255
TRINITY_DN149_c0_g2	0	0	0	0	0	Q9BTX7	Alpha-tocopherol transfer protein-like	Ttpal
TRINITY_DN149_c1_g2	0	0	0	0	0	P51949	CDK-activating kinase assembly factor MAT1 (CDK7/cyclin-H assembly factor) (Menage a trois) (RING finger protein MAT1) (p35) (p36)	Mnat1	Mat1
TRINITY_DN1493_c0_g1	0	0	0	0	0	Q155U0	Vacuolar protein sorting-associated protein 51 homolog (Protein fat-free homolog)	Vps51	Ffr
TRINITY_DN14942_c0_g1	0	0	0	0	0	Q7Z449	Cytochrome P450 2U1 (Long-chain fatty acid omega-monooxygenase) (EC 1.14.14.80)	Cyp2u1
TRINITY_DN14949_c0_g1	0	0	0	0	0	Q96DR7	Rho guanine nucleotide exchange factor 16 (Ephexin-4)	Arhgef16
TRINITY_DN14973_c0_g1	0	0	0	0	0	Q8WTR2	Dual specificity protein phosphatase 19 (EC 3.1.3.16) (EC 3.1.3.48) (Protein phosphatase SKRP1) (Stress-activated protein kinase pathway-regulating phosphatase 1)	Dusp19	Skrp1
TRINITY_DN14983_c0_g1	0	0	0	0	0	Q3SZE3	Phospholipid phosphatase 3 (EC 3.1.3.-) (EC 3.1.3.4) (Lipid phosphate phosphohydrolase 3) (PAP2-beta) (Phosphatidate phosphohydrolase type 2b) (Phosphatidic acid phosphatase 2b) (PAP-2b) (PAP2b)	Plpp3	Lpp3	Ppap2b
TRINITY_DN15027_c0_g1	0	0	0	0	0	Q9EQC4	Elongation of very long chain fatty acids protein 4 (EC 2.3.1.199) (3-keto acyl-CoA synthase Elovl4) (ELOVL fatty acid elongase 4) (ELOVL FA elongase 4) (Very long chain 3-ketoacyl-CoA synthase 4) (Very long chain 3-oxoacyl-CoA synthase 4)	Elovl4
TRINITY_DN15045_c0_g1	0	0	0	0	0	C0HAV3	Zinc finger CCCH-type with G patch domain-containing protein	Zgpat	Kiaa1847
TRINITY_DN15056_c0_g1	0	0	0	0	0	Q9JLN9	Serine/threonine-protein kinase mTOR (EC 2.7.11.1) (FK506-binding protein 12-rapamycin complex-associated protein 1) (FKBP12-rapamycin complex-associated protein) (Mammalian target of rapamycin) (mTOR) (Mechanistic target of rapamycin) (Rapamycin target protein 1) (RAPT1)	Mtor	Frap	Frap1
TRINITY_DN15057_c0_g1	0	0	0	0	0	Q9Y6F8	Chromodomain Y-like protein (CDY-like) (Crotonyl-CoA hydratase) (EC 4.2.1.-) (Putative histone acetyltransferase Cdyl) (EC 2.3.1.48)	Cdyl
TRINITY_DN1506_c1_g1	0	0	0	0	0	Q6NUQ1	RAD50-interacting protein 1 (RAD50 interactor 1) (RINT-1)	Rint1
TRINITY_DN15069_c0_g3	0	0	0	0	0	Q7K738	Ubiquitin-conjugating enzyme E2 L3 (EC 2.3.2.23) (E2 ubiquitin-conjugating enzyme L3) (UbcM4) (Ubiquitin carrier protein L3) (Ubiquitin-protein ligase L3)	Ube2l3	Ubce7
TRINITY_DN1507_c0_g2	0	0	0	0	0	O60341	Lysine-specific histone demethylase 1A (EC 1.14.99.66) (BRAF35-HDAC complex protein BHC110) (Flavin-containing amine oxidase domain-containing protein 2)	Kdm1a	Aof2	Kiaa0601	Lsd1
TRINITY_DN1507_c3_g1	0	0	0	0	0	Q6AZB8	Putative nuclease HARBI1 (EC 3.1.-.-) (Harbinger transposase-derived nuclease)	Harbi1
TRINITY_DN15073_c0_g1	0	0	0	0	0	A2AWA9	Rab GTPase-activating protein 1 (GAP and centrosome-associated protein) (Rab6 GTPase-activating protein GAPCenA)	Rabgap1	Kiaa4104
TRINITY_DN1508_c0_g1	0	0	0	0	0	Q95245	Cytochrome b561 (Cytochrome b-561)	Cyb561	Mcyt
TRINITY_DN150966_c0_g1	0	0	0	0	0	Q8CFI7	DNA-directed RNA polymerase II subunit RPB2 (EC 2.7.7.6) (DNA-directed RNA polymerase II 140 kDa polypeptide) (DNA-directed RNA polymerase II subunit B) (RNA polymerase II subunit 2) (RNA polymerase II subunit B2)	Polr2b
TRINITY_DN151_c0_g2	0	0	0	0	0	Q5RBG4	Histone acetyltransferase KAT5 (EC 2.3.1.48) (60 kDa Tat-interactive protein) (Tip60) (Histone acetyltransferase HTATIP) (Lysine acetyltransferase 5)	Kat5	Htatip	Tip60
TRINITY_DN15121_c0_g1	0	0	0	0	0	E9Q6P5	Tetratricopeptide repeat protein 7B (TPR repeat protein 7B)	Ttc7b
TRINITY_DN15131_c0_g1	0	0	0	0	0	Q8NDA8	Maestro heat-like repeat-containing protein family member 2B (HEAT repeat-containing protein 7B2) (Sperm PKA-interacting factor) (SPIF)	Mroh2b	Heatr7b2
TRINITY_DN15140_c0_g1	0	0	0	0	0	P35446	Spondin-1 (F-spondin)	Spon1
TRINITY_DN1515_c0_g1	0	0	0	0	0	Q9MYM7	Beta-1,3-galactosyltransferase 1 (Beta-1,3-GalTase 1) (Beta3Gal-T1) (Beta3GalT1) (EC 2.4.1.86) (UDP-Gal:betaGlcNAc beta 1,3-galactosyltransferase-I) (UDP-galactose:beta-N-acetyl-glucosamine-beta-1,3-galactosyltransferase 1)	B3galt1
TRINITY_DN151641_c0_g1	0	0	0	0	0	O15978	Protein Wnt-5a	Wnt5a	Wnt-5a
TRINITY_DN15172_c0_g1	0	0	0	0	0	Q3SZL0	Bile acid receptor (Farnesoid X-activated receptor) (Farnesol receptor HRR-1) (Nuclear receptor subfamily 1 group H member 4) (Retinoid X receptor-interacting protein 14) (RXR-interacting protein 14)	Nr1h4	Bar	Fxr	Rip14
TRINITY_DN151835_c0_g1	0	0	0	0	0	Q9UNN5	FAS-associated factor 1	Faf1
TRINITY_DN15184_c0_g2	0	0	0	0	0	P21956	Lactadherin (MFGM) (Milk fat globule-EGF factor 8) (MFG-E8) (SED1) (Sperm surface protein SP47) (MP47)	Mfge8
TRINITY_DN15192_c0_g2	0	0	0	0	0	Q3UIR3	E3 ubiquitin-protein ligase DTX3L (EC 2.3.2.27) (Protein deltex-3-like) (RING-type E3 ubiquitin transferase DTX3L)	Dtx3l	Bbap
TRINITY_DN15199_c0_g1	0	0	0	0	0	Q96EZ8	Microspherule protein 1 (58 kDa microspherule protein)	Mcrs1	Msp58
TRINITY_DN15247_c0_g1	0	0	0	0	0	Q9NQR4	Omega-amidase NIT2 (EC 3.5.1.3) (Nitrilase homolog 2)	Nit2	D16Ertd502e
TRINITY_DN15268_c0_g2	0	0	0	0	0	Q01827	Synaptic vesicular amine transporter (Monoamine transporter) (Solute carrier family 18 member 2) (Vesicular amine transporter 2) (VAT2)	Slc18a2	Vmat2
TRINITY_DN15273_c0_g1	0	0	0	0	0	Q9NZR2	Very low-density lipoprotein receptor (VLDL receptor) (VLDL-R)	Vldlr
TRINITY_DN15274_c0_g1	0	0	0	0	0	Q9JK84	Partitioning defective 6 homolog gamma (PAR-6 gamma) (PAR6A)	Pard6g	Par6g
TRINITY_DN15279_c0_g1	0	0	0	0	0	Q8BZM0	Kelch-like protein 12 (CUL3-interacting protein 1)	Klhl12	C3ip1
TRINITY_DN15285_c0_g2	0	0	0	0	0	Q9EQY0	Serine/threonine-protein kinase/endoribonuclease IRE1 (Endoplasmic reticulum-to-nucleus signaling 1) (Inositol-requiring protein 1) (Ire1-alpha) (IRE1a) [Includes: Serine/threonine-protein kinase (EC 2.7.11.1); Endoribonuclease (EC 3.1.26.-)]	Ern1	Ire1
TRINITY_DN15286_c0_g1	0	0	0	0	0	Q3ZMH1	Sodium-coupled monocarboxylate transporter 1 (Electrogenic sodium monocarboxylate cotransporter) (Solute carrier family 5 member 8)	Slc5a8	Smct	Smct1
TRINITY_DN15289_c0_g2	0	0	0	0	0	O94889	Kelch-like protein 18	Klhl18
TRINITY_DN153_c0_g1	0	0	0	0	0	Q28740	Basigin (Basic immunoglobulin superfamily) (HT7 antigen) (Membrane glycoprotein gp42) (CD antigen CD147)	Bsg
TRINITY_DN1530_c3_g1	0	0	0	0	0	Q9NXS3	Kelch-like protein 28 (BTB/POZ domain-containing protein 5)	Klhl28	Btbd5
TRINITY_DN15312_c0_g1	0	0	0	0	0	P50473	Arylsulfatase A (ASA) (EC 3.1.6.8) (Cerebroside-sulfatase)	Arsa	As2
TRINITY_DN15327_c0_g1	0	0	0	0	0	Q16600	Zinc finger and SCAN domain-containing protein 2 (Zinc finger protein 29) (Zfp-29)	Zscan2	Zfp-29	Zfp29
TRINITY_DN15334_c0_g1	0	0	0	0	0	Q3SZA2	Protein FMC1 homolog (Formation of mitochondrial complex V assembly factor 1)	Fmc1
TRINITY_DN15347_c1_g1	0	0	0	0	0	Q03601	Tripartite motif-containing protein 3 (RING finger protein 22) (RING finger protein HAC1)	Trim3	Hac1	Rnf22
TRINITY_DN153496_c0_g1	0	0	0	0	0	Q6P560	Zinc finger protein 182 (Zinc finger protein 21)	Znf182	Zfp182	Znf21
TRINITY_DN15354_c1_g1	0	0	0	0	0	Q95SX7	#N/A	#N/A
TRINITY_DN153604_c0_g1	0	0	0	0	0	F4ZGF2	Catechol O-methyltransferase (EC 2.1.1.6)	Comt	Comt1
TRINITY_DN15373_c0_g1	0	0	0	0	0	P20825	#N/A	#N/A
TRINITY_DN15389_c0_g1	0	0	0	0	0	Q3ZC89	Methionine aminopeptidase 2 (MAP 2) (MetAP 2) (EC 3.4.11.18) (Initiation factor 2-associated 67 kDa glycoprotein) (p67) (p67eIF2) (Peptidase M)	Metap2	Mnpep	P67eif2
TRINITY_DN15392_c0_g1	0	0	0	0	0	Q7TMV1	E3 ubiquitin-protein ligase RNF139 (EC 2.3.2.27) (RING finger protein 139) (RING-type E3 ubiquitin transferase RNF139) (Translocation in renal carcinoma on chromosome 8 protein)	Rnf139
TRINITY_DN15401_c0_g2	0	0	0	0	0	P15535	Beta-1,4-galactosyltransferase 1 (Beta-1,4-GalTase 1) (Beta4Gal-T1) (b4Gal-T1) (EC 2.4.1.-) (Beta-N-acetylglucosaminyl-glycolipid beta-1,4-galactosyltransferase) (Beta-N-acetylglucosaminylglycopeptide beta-1,4-galactosyltransferase) (EC 2.4.1.38) (Lactose synthase A protein) (EC 2.4.1.22) (N-acetyllactosamine synthase) (EC 2.4.1.90) (Nal synthase) (Neolactotriaosylceramide beta-1,4-galactosyltran…	B4galt1	Ggtb	Ggtb2
TRINITY_DN15401_c1_g3	0	0	0	0	0	P15535	Beta-1,4-galactosyltransferase 1 (Beta-1,4-GalTase 1) (Beta4Gal-T1) (b4Gal-T1) (EC 2.4.1.-) (Beta-N-acetylglucosaminyl-glycolipid beta-1,4-galactosyltransferase) (Beta-N-acetylglucosaminylglycopeptide beta-1,4-galactosyltransferase) (EC 2.4.1.38) (Lactose synthase A protein) (EC 2.4.1.22) (N-acetyllactosamine synthase) (EC 2.4.1.90) (Nal synthase) (Neolactotriaosylceramide beta-1,4-galactosyltran…	B4galt1	Ggtb	Ggtb2
TRINITY_DN15408_c0_g1	0	0	0	0	0	Q96DM1	#N/A	#N/A
TRINITY_DN15422_c0_g1	0	0	0	0	0	P29315	#N/A	#N/A
TRINITY_DN15445_c0_g1	0	0	0	0	0	Q6PH19	Glycine amidinotransferase, mitochondrial (EC 2.1.4.1) (L-arginine:glycine amidinotransferase) (Transamidinase)	Gatm
TRINITY_DN15449_c0_g1	0	0	0	0	0	A0A0R4I9Y1	#N/A	#N/A
TRINITY_DN15450_c0_g1	0	0	0	0	0	Q6NZJ6	Eukaryotic translation initiation factor 4 gamma 1 (eIF-4-gamma 1) (eIF-4G 1) (eIF-4G1)	Eif4g1
TRINITY_DN15452_c0_g2	0	0	0	0	0	Q3MHQ7	Lysoplasmalogenase-like protein TMEM86A (Transmembrane protein 86A)	Tmem86a
TRINITY_DN15453_c0_g1	0	0	0	0	0	Q29S00	Protein OSCP1	Oscp1
TRINITY_DN15469_c0_g1	0	0	0	0	0	P21328	#N/A	#N/A
TRINITY_DN1548_c0_g1	0	0	0	0	0	Q8K4L3	Supervillin (Archvillin) (p205/p250)	Svil
TRINITY_DN15484_c0_g1	0	0	0	0	0	Q99698	Lysosomal-trafficking regulator (Beige protein) (CHS1 homolog)	Lyst	Bg	Chs1
TRINITY_DN1550_c0_g1	0	0	0	0	0	O04486	Ras-related protein Rab-11A (Rab-11)	Rab11a	Rab11
TRINITY_DN15512_c0_g1	0	0	0	0	0	A8K2U0	Pregnancy zone protein (Alpha-2-macroglobulin) (Alpha-2-M) [Cleaved into: Alpha-2-macroglobulin 165 kDa subunit; Alpha-2-macroglobulin 35 kDa subunit]	Pzp	A2m
TRINITY_DN1553_c0_g1	0	0	0	0	0	Q2PFZ3	Peroxiredoxin-2 (EC 1.11.1.24) (Thiol-specific antioxidant protein) (TSA) (Thioredoxin peroxidase 1) (Thioredoxin-dependent peroxide reductase 1) (Thioredoxin-dependent peroxiredoxin 2)	Prdx2	Tdpx1	Tpx
TRINITY_DN15542_c0_g1	0	0	0	0	0	A4D1U4	DENN domain-containing protein 11 (DENND11) (Protein LCHN)	Dennd11	Kiaa1147	Lchn
TRINITY_DN15546_c0_g3	0	0	0	0	0	Q6IE52	#N/A	#N/A
TRINITY_DN15560_c0_g1	0	0	0	0	0	Q58D72	Atlastin-1 (EC 3.6.5.-) (Spastic paraplegia 3A homolog)	Atl1	Spg3a
TRINITY_DN15606_c0_g1	0	0	0	0	0	Q5ZML3	Serine/arginine-rich splicing factor 1 (ASF/SF2) (Pre-mRNA-splicing factor SRp30a) (Splicing factor, arginine/serine-rich 1)	Srsf1	Sfrs1
TRINITY_DN156114_c0_g1	0	0	0	0	0	P12078	Heat shock cognate 71 kDa protein (Heat shock 70 kDa protein 8)	Hspa8	Hsc70	Hsc73
TRINITY_DN15613_c0_g1	0	0	0	0	0	Q5M8Y7	Mediator of RNA polymerase II transcription subunit 4 (Mediator complex subunit 4)	Med4	Vdrip
TRINITY_DN156379_c0_g3	0	0	0	0	0	Q5IS65	Adenosine receptor A2b	Adora2b
TRINITY_DN1564_c0_g1	0	0	0	0	0	P07602	Prosaposin (Sulfated glycoprotein 1) (SGP-1) [Cleaved into: Saposin-A; Saposin-B-Val; Saposin-B; Saposin-C; Saposin-D]	Psap	Sgp1
TRINITY_DN15646_c0_g1	0	0	0	0	0	F6Y9J3	F-box only protein 9	Fbxo9	MNCb-2471
TRINITY_DN15647_c0_g1	0	0	0	0	0	Q9UET6	pre-rRNA 2'-O-ribose RNA methyltransferase FTSJ3 (EC 2.1.1.-) (Protein ftsJ homolog 3) (Putative rRNA methyltransferase 3)	Ftsj3
TRINITY_DN15674_c0_g1	0	0	0	0	0	Q62210	#N/A	#N/A
TRINITY_DN15675_c1_g1	0	0	0	0	0	Q8IYX0	Zinc finger protein 32 (Zinc finger protein 637)	Znf32	Zfp637
TRINITY_DN15677_c0_g1	0	0	0	0	0	Q95SX7	#N/A	#N/A
TRINITY_DN15682_c0_g1	0	0	0	0	0	P18433	Receptor-type tyrosine-protein phosphatase S (R-PTP-S) (EC 3.1.3.48) (PTPNU-3) (Receptor-type tyrosine-protein phosphatase sigma) (R-PTP-sigma)	Ptprs
TRINITY_DN15682_c0_g2	0	0	0	0	0	P18433	Receptor-type tyrosine-protein phosphatase epsilon (Protein-tyrosine phosphatase epsilon) (R-PTP-epsilon) (EC 3.1.3.48)	Ptpre	Ptpe
TRINITY_DN15682_c1_g1	0	0	0	0	0	Q9IBD8	Receptor-type tyrosine-protein phosphatase alpha (Protein-tyrosine phosphatase alpha) (R-PTP-alpha) (EC 3.1.3.48) (LCA-related phosphatase) (PTPTY-28)	Ptpra	Lrp	Ptpa
TRINITY_DN15685_c0_g1	0	0	0	0	0	Q5XHZ6	Kelch-like protein 7	Klhl7
TRINITY_DN15690_c0_g1	0	0	0	0	0	Q8R1Z9	RING finger protein 121	Rnf121
TRINITY_DN15703_c0_g1	0	0	0	0	0	O54697	Aminopeptidase NAALADL1 (EC 3.4.11.-) (N-acetylated-alpha-linked acidic dipeptidase-like protein) (NAALADase L)	Naaladl1	Gm964	Naaladasel
TRINITY_DN15716_c0_g1	0	0	0	0	0	Q26304	Medium-chain acyl-CoA ligase ACSF2, mitochondrial (EC 6.2.1.2)	Acsf2
TRINITY_DN15732_c0_g1	0	0	0	0	0	Q13093	Platelet-activating factor acetylhydrolase 2, cytoplasmic (EC 3.1.1.47) (Serine-dependent phospholipase A2) (SD-PLA2)	Pafah2
TRINITY_DN1574_c0_g1	0	0	0	0	0	Q9Y664	KICSTOR complex protein kaptin	Kptn
TRINITY_DN15762_c0_g1	0	0	0	0	0	Q5U374	Kelch-like protein 12 (CUL3-interacting protein 1)	Klhl12	C3ip1
TRINITY_DN157765_c0_g1	0	0	0	0	0	P50476	Homeobox even-skipped homolog protein 1 (EVX-1)	Evx1
TRINITY_DN1578_c0_g2	0	0	0	0	0	P40818	#N/A	#N/A
TRINITY_DN1578_c0_g3	0	0	0	0	0	Q80U87	Ubiquitin carboxyl-terminal hydrolase 8 (EC 3.4.19.12) (Deubiquitinating enzyme 8) (Ubiquitin isopeptidase Y) (mUBPy) (Ubiquitin thioesterase 8) (Ubiquitin-specific-processing protease 8)	Usp8	Kiaa0055	Ubpy
TRINITY_DN157929_c0_g1	0	0	0	0	0	Q9W6R5	Retinoschisin (X-linked juvenile retinoschisis protein homolog)	Rs1	Rs1h	Xlrs1
TRINITY_DN15799_c0_g1	0	0	0	0	0	P30122	#N/A	#N/A
TRINITY_DN15805_c0_g1	0	0	0	0	0	Q8VC51	Telomerase Cajal body protein 1 (WD repeat-containing protein 79) (WD40 repeat-containing protein antisense to TP53 gene homolog)	Wrap53	Tcab1	Wdr79
TRINITY_DN1581_c0_g1	0	0	0	0	0	Q70IA6	MOB kinase activator 2 (Mob2 homolog) (Mps one binder kinase activator-like 2) (Ovary-specific MOB-like protein)	Mob2	Mmh
TRINITY_DN15825_c0_g1	0	0	0	0	0	A4QP81	#N/A	#N/A
TRINITY_DN15826_c1_g1	0	0	0	0	0	Q8K1A6	Coiled-coil and C2 domain-containing protein 1A (Five prime repressor element under dual repression-binding protein 1) (FRE under dual repression-binding protein 1) (Freud-1)	Cc2d1a
TRINITY_DN15854_c0_g1	0	0	0	0	0	P84185	Actin, gamma-enteric smooth muscle (Alpha-actin-3) (Gamma-2-actin) (Smooth muscle gamma-actin) [Cleaved into: Actin, gamma-enteric smooth muscle, intermediate form]	Actg2	Acta3	Actsg
TRINITY_DN158630_c0_g1	0	0	0	0	0	Q90XB3	Oligodendrocyte transcription factor 2 (Oligo2)	Olig2
TRINITY_DN158640_c0_g1	0	0	0	0	0	A0A0R4IBK5	#N/A	#N/A
TRINITY_DN15873_c0_g1	0	0	0	0	0	Q5R7B8	Kelch-like protein 20 (Kelch-like ECT2-interacting protein)	Klhl20	Kiaa4210	Kleip
TRINITY_DN1589_c0_g1	0	0	0	0	0	O95562	Vesicle transport protein SFT2B (SFT2 domain-containing protein 2)	Sft2d2
TRINITY_DN15891_c0_g1	0	0	0	0	0	G3V928	Prolow-density lipoprotein receptor-related protein 1 (LRP-1) (Alpha-2-macroglobulin receptor) (A2MR) (CD antigen CD91) [Cleaved into: Low-density lipoprotein receptor-related protein 1 85 kDa subunit (LRP-85); Low-density lipoprotein receptor-related protein 1 515 kDa subunit (LRP-515); Low-density lipoprotein receptor-related protein 1 intracellular domain (LRPICD)]	Lrp1	A2mr
TRINITY_DN15894_c0_g1	0	0	0	0	0	Q60806	Serine/threonine-protein kinase PLK3 (EC 2.7.11.21) (Cytokine-inducible serine/threonine-protein kinase) (FGF-inducible kinase) (Polo-like kinase 3) (PLK-3)	Plk3	Cnk	Fnk
TRINITY_DN15905_c0_g1	0	0	0	0	0	Q6NT16	MFS-type transporter SLC18B1 (Solute carrier family 18 member B1)	Slc18b1
TRINITY_DN15916_c0_g1	0	0	0	0	0	Q5U508	Tubulin-specific chaperone E (Tubulin-folding cofactor E)	Tbce
TRINITY_DN1592_c0_g2	0	0	0	0	0	Q9BQ04	RNA-binding protein 4B (RNA-binding motif protein 30) (RNA-binding motif protein 4B) (RNA-binding protein 30)	Rbm4b	Rbm30
TRINITY_DN15922_c0_g1	0	0	0	0	0	Q09499	Serine/threonine-protein kinase/endoribonuclease IRE2 (Endoplasmic reticulum-to-nucleus signaling 2) (Inositol-requiring protein 2) (Ire1-beta) (IRE1b) (mIre1) [Includes: Serine/threonine-protein kinase (EC 2.7.11.1); Endoribonuclease (EC 3.1.26.-)]	Ern2	Ire2
TRINITY_DN15922_c0_g3	0	0	0	0	0	Q09499	Mitogen-activated protein kinase kinase kinase 12 (EC 2.7.11.25) (Dual leucine zipper bearing kinase) (DLK) (Leucine-zipper protein kinase) (ZPK) (MAPK-upstream kinase) (MUK) (Mixed lineage kinase)	Map3k12	Zpk
TRINITY_DN15923_c0_g1	0	0	0	0	0	Q5R8H5	#N/A	#N/A
TRINITY_DN15930_c0_g1	0	0	0	0	0	Q29504	Ubiquitin-like modifier-activating enzyme 1 (EC 6.2.1.45) (Ubiquitin-activating enzyme E1) (Ubiquitin-activating enzyme E1 X) (Ubiquitin-like modifier-activating enzyme 1 X)	Uba1	Sbx	Ube1	Ube1ax	Ube1x
TRINITY_DN15933_c0_g1	0	0	0	0	0	Q24157	#N/A	#N/A
TRINITY_DN15946_c0_g1	0	0	0	0	0	O96006	#N/A	#N/A
TRINITY_DN159480_c0_g1	0	0	0	0	0	Q13490	Baculoviral IAP repeat-containing protein 3 (EC 2.3.2.27) (Cellular inhibitor of apoptosis 2) (C-IAP2) (Inhibitor of apoptosis protein 1) (mIAP1) (RING-type E3 ubiquitin transferase BIRC3)	Birc3
TRINITY_DN15955_c0_g1	0	0	0	0	0	P58021	Transmembrane 9 superfamily member 2	Tm9sf2
TRINITY_DN1597_c0_g1	0	0	0	0	0	Q4V7C7	Actin-related protein 3 (Actin-like protein 3)	Actr3	Arp3
TRINITY_DN15981_c0_g1	0	0	0	0	0	Q9NVP4	Double zinc ribbon and ankyrin repeat-containing protein 1	Dzank1
TRINITY_DN1599_c0_g1	0	0	0	0	0	Q4QQV8	Charged multivesicular body protein 5 (Chromatin-modifying protein 5) (SNF7 domain-containing protein 2)	Chmp5	Snf7dc2
TRINITY_DN1600_c0_g1	0	0	0	0	0	Q8NCE0	tRNA-splicing endonuclease subunit Sen2 (EC 4.6.1.16) (tRNA-intron endonuclease Sen2)	Tsen2	Sen2
TRINITY_DN16001_c0_g1	0	0	0	0	0	Q5ZMS3	Eukaryotic translation initiation factor 2 subunit 3, Y-linked (EC 3.6.5.3) (Eukaryotic translation initiation factor 2 subunit gamma, Y-linked) (eIF-2-gamma Y) (Spermatogonial proliferation factor) (Spy)	Eif2s3y
TRINITY_DN16012_c0_g1	0	0	0	0	0	Q4TVV3	Probable ATP-dependent RNA helicase DDX46 (EC 3.6.4.13) (DEAD box protein 46)	Ddx46	Kiaa0801
TRINITY_DN16024_c1_g1	0	0	0	0	0	P97612	Fatty-acid amide hydrolase 1 (EC 3.5.1.99) (Anandamide amidohydrolase 1) (Fatty acid ester hydrolase) (EC 3.1.1.-) (Oleamide hydrolase 1)	Faah	Faah1
TRINITY_DN1606_c0_g2	0	0	0	0	0	Q8C033	Rho guanine nucleotide exchange factor 10	Arhgef10	Kiaa0294
TRINITY_DN1606_c1_g1	0	0	0	0	0	Q5E9Y5	Decapping and exoribonuclease protein (DXO) (EC 3.1.13.-) (EC 3.6.1.-) (Dom-3 homolog Z)	Dxo	Dom3z	Ng6
TRINITY_DN160617_c0_g1	0	0	0	0	0	P16581	#N/A	#N/A
TRINITY_DN1607_c2_g1	0	0	0	0	0	Q7ZTY6	Uncharacterized protein C7orf26 homolog	0
TRINITY_DN16072_c0_g1	0	0	0	0	0	Q6NY64	Serine/threonine-protein phosphatase 2A 55 kDa regulatory subunit B alpha isoform (PP2A subunit B isoform B55-alpha) (PP2A subunit B isoform PR55-alpha) (PP2A subunit B isoform R2-alpha) (PP2A subunit B isoform alpha)	Ppp2r2a
TRINITY_DN16075_c0_g1	0	0	0	0	0	O01735	#N/A	#N/A
TRINITY_DN161_c0_g1	0	0	0	0	0	Q8TC12	Retinol dehydrogenase 11 (EC 1.1.1.300) (Androgen-regulated short-chain dehydrogenase/reductase 1) (Cell line MC/9.IL4-derived protein 1) (M42C60) (Prostate short-chain dehydrogenase/reductase 1) (Retinal reductase 1) (RalR1) (Short-chain aldehyde dehydrogenase) (SCALD)	Rdh11	Arsdr1	Mdt1	Psdr1
TRINITY_DN1612_c0_g1	0	0	0	0	0	Q6P1S4	Arginine--tRNA ligase, cytoplasmic (EC 6.1.1.19) (Arginyl-tRNA synthetase) (ArgRS)	Rars1	Rars
TRINITY_DN16131_c0_g1	0	0	0	0	0	A5D8Q0	E3 ubiquitin-protein ligase XIAP (EC 2.3.2.27) (Baculoviral IAP repeat-containing protein 4) (IAP homolog A) (Inhibitor of apoptosis protein 3) (IAP-3) (mIAP-3) (mIAP3) (RING-type E3 ubiquitin transferase XIAP) (X-linked inhibitor of apoptosis protein) (X-linked IAP)	Xiap	Aipa	Api3	Birc4	Miha
TRINITY_DN16140_c0_g1	0	0	0	0	0	Q6GNL1	Glycoprotein-N-acetylgalactosamine 3-beta-galactosyltransferase 1 (EC 2.4.1.122) (Core 1 O-glycan T-synthase) (T-syn) (Core 1 UDP-galactose:N-acetylgalactosamine-alpha-R beta 1,3-galactosyltransferase 1) (Core 1 beta1,3-galactosyltransferase 1) (C1GalT1) (Core 1 beta3-Gal-T1)	C1galt1	Plt1
TRINITY_DN16157_c0_g2	0	0	0	0	0	Q61010	E3 ubiquitin-protein ligase DTX1 (EC 2.3.2.27) (FXI-T1) (Protein deltex-1) (Deltex1) (mDTX1) (RING-type E3 ubiquitin transferase DTX1)	Dtx1
TRINITY_DN16160_c0_g1	0	0	0	0	0	P18433	Receptor-type tyrosine-protein phosphatase alpha (Protein-tyrosine phosphatase alpha) (R-PTP-alpha) (EC 3.1.3.48) (LCA-related phosphatase) (PTPTY-28)	Ptpra	Lrp	Ptpa
TRINITY_DN16163_c0_g1	0	0	0	0	0	Q9YGL9	#N/A	#N/A
TRINITY_DN1617_c0_g1	0	0	0	0	0	Q6DCX5	Proton-coupled folate transporter (Heme carrier protein 1) (PCFT/HCP1) (Solute carrier family 46 member 1)	Slc46a1	D11Ertd18e	Hcp1	Pcft
TRINITY_DN16172_c0_g1	0	0	0	0	0	Q61555	Fibrillin-2 [Cleaved into: Fibrillin-2 C-terminal peptide]	Fbn2	Fbn-2
TRINITY_DN1619_c0_g2	0	0	0	0	0	P78524	DENN domain-containing protein 2B (HeLa tumor suppression 1) (Suppression of tumorigenicity 5 protein)	Dennd2b	Denn2b	St5
TRINITY_DN16197_c0_g2	0	0	0	0	0	Q9NBX4	#N/A	#N/A
TRINITY_DN16203_c0_g2	0	0	0	0	0	Q9H2A9	Carbohydrate sulfotransferase 8 (EC 2.8.2.-) (GalNAc-4-O-sulfotransferase 1) (GalNAc-4-ST1) (GalNAc4ST-1) (N-acetylgalactosamine-4-O-sulfotransferase 1)	Chst8
TRINITY_DN1621_c0_g1	0	0	0	0	0	P28663	Beta-soluble NSF attachment protein (SNAP-beta) (Brain protein I47) (N-ethylmaleimide-sensitive factor attachment protein beta)	Napb	Snapb
TRINITY_DN1622_c0_g1	0	0	0	0	0	E9PU28	Inosine-5'-monophosphate dehydrogenase 2 (IMP dehydrogenase 2) (IMPD 2) (IMPDH 2) (EC 1.1.1.205) (IMPDH-II)	Impdh2
TRINITY_DN16228_c0_g1	0	0	0	0	0	O14841	5-oxoprolinase (EC 3.5.2.9) (5-oxo-L-prolinase) (5-OPase) (Pyroglutamase)	Oplah
TRINITY_DN16260_c0_g1	0	0	0	0	0	P33533	Delta-type opioid receptor (D-OR-1) (DOR-1) (K56) (MSL-2)	Oprd1
TRINITY_DN16262_c1_g1	0	0	0	0	0	Q5U374	Kelch-like protein 12 (CUL3-interacting protein 1)	Klhl12	C3ip1
TRINITY_DN16267_c0_g1	0	0	0	0	0	Q9NBX4	LINE-1 retrotransposable element ORF2 protein (ORF2p) (Long interspersed element-1) (L1) (Retrovirus-related Pol polyprotein LINE-1) [Includes: Reverse transcriptase (EC 2.7.7.49); Endonuclease (EC 3.1.21.-)]	Pol	Gm17492
TRINITY_DN1628_c0_g1	0	0	0	0	0	Q7ZTY7	Vesicle transport protein USE1 (Protein D12) (USE1-like protein)	Use1	Use1l
TRINITY_DN16297_c0_g1	0	0	0	0	0	Q63HN8	#N/A	#N/A
TRINITY_DN1630_c0_g1	0	0	0	0	0	Q6DUZ9	EARP and GARP complex-interacting protein 1 (Endosome-associated recycling protein-interacting protein) (Golgi-associated retrograde protein-interacting protein) (Tumor-suppressing STF cDNA 1 protein) (Tumor-suppressing subchromosomal transferable fragment candidate gene 1 protein)	Eipr1	Tssc1
TRINITY_DN1634_c0_g2	0	0	0	0	0	O35083	1-acyl-sn-glycerol-3-phosphate acyltransferase alpha (EC 2.3.1.51) (1-acylglycerol-3-phosphate O-acyltransferase 1) (1-AGP acyltransferase 1) (1-AGPAT 1) (Lysophosphatidic acid acyltransferase alpha) (LPAAT-alpha)	Agpat1
TRINITY_DN16340_c0_g1	0	0	0	0	0	Q5TAX3	Terminal uridylyltransferase 4 (TUTase 4) (EC 2.7.7.52) (Zinc finger CCHC domain-containing protein 11)	Tut4	Kiaa0191	Zcchc11
TRINITY_DN16347_c0_g1	0	0	0	0	0	P10076	Zinc finger protein 26 (Zfp-26) (Protein mKR3)	Zfp26	Kiaa4196	Mkr3	Zfp-26
TRINITY_DN16361_c0_g1	0	0	0	0	0	Q90879	Ubiquitin-conjugating enzyme E2 variant 2 (Ubc-like protein MMS2)	Ube2v2	Mms2	Uev2
TRINITY_DN16370_c0_g1	0	0	0	0	0	Q8N9R8	Protein SCAI (Suppressor of cancer cell invasion protein)	Scai
TRINITY_DN163918_c0_g1	0	0	0	0	0	P32320	Cytidine deaminase (EC 3.5.4.5) (Cytidine aminohydrolase)	Cda	Cdd
TRINITY_DN16397_c0_g1	0	0	0	0	0	Q8N9F8	Zinc finger protein with KRAB and SCAN domains 1	Zkscan1
TRINITY_DN16413_c0_g1	0	0	0	0	0	Q5BLX8	WD repeat domain-containing protein 83 (Mitogen-activated protein kinase organizer 1) (MAPK organizer 1)	Wdr83	Morg1
TRINITY_DN1642_c0_g1	0	0	0	0	0	Q5ZKJ4	FGFR1 oncogene partner 2 homolog	Fgfr1op2
TRINITY_DN16424_c0_g1	0	0	0	0	0	Q9Z1A6	#N/A	#N/A
TRINITY_DN16426_c0_g1	0	0	0	0	0	P22105	Tenascin (TN) (Hexabrachion) (Tenascin-C) (TN-C)	Tnc	Hxb
TRINITY_DN16444_c1_g1	0	0	0	0	0	O88446	Solute carrier family 22 member 21 (Organic cation/carnitine transporter 3) (Solute carrier family 22 member 9)	Slc22a21	Octn3	Slc22a9
TRINITY_DN16447_c1_g1	0	0	0	0	0	P67939	Tumor protein p73 (p53-like transcription factor) (p53-related protein)	Tp73	P73	Trp73
TRINITY_DN1645_c0_g1	0	0	0	0	0	Q92556	Engulfment and cell motility protein 1 (Protein ced-12 homolog)	Elmo1
TRINITY_DN1646_c0_g1	0	0	0	0	0	Q7ZV50	Magnesium transporter protein 1 (MagT1) (Dolichyl-diphosphooligosaccharide--protein glycosyltransferase subunit MAGT1) (Oligosaccharyl transferase subunit MAGT1) (Implantation-associated protein) (IAP)	Magt1	Iag2
TRINITY_DN16464_c0_g1	0	0	0	0	0	Q9Y2P8	RNA 3'-terminal phosphate cyclase-like protein	Rcl1	Rnac
TRINITY_DN16465_c0_g1	0	0	0	0	0	Q8WVQ1	Soluble calcium-activated nucleotidase 1 (SCAN-1) (EC 3.6.1.6) (Apyrase homolog)	Cant1
TRINITY_DN1647_c0_g1	0	0	0	0	0	P21573	Y-box-binding protein 3 (Cold shock domain-containing protein A) (DNA-binding protein A) (Y-box protein 3)	Ybx3	Csda	Msy4
TRINITY_DN165_c0_g1	0	0	0	0	0	A9ZSY3	Solute carrier family 2, facilitated glucose transporter member 8 (Glucose transporter type 8) (GLUT-8) (Glucose transporter type X1)	Slc2a8	Glut8	GlutX1
TRINITY_DN16502_c0_g2	0	0	0	0	0	Q8R344	Coiled-coil domain-containing protein 12	Ccdc12
TRINITY_DN16509_c1_g2	0	0	0	0	0	Q96LL4	Uncharacterized protein C8orf48 homolog	0
TRINITY_DN16523_c0_g1	0	0	0	0	0	Q9EQY0	Serine/threonine-protein kinase/endoribonuclease IRE1 (Endoplasmic reticulum-to-nucleus signaling 1) (Inositol-requiring protein 1) (Ire1-alpha) (IRE1a) [Includes: Serine/threonine-protein kinase (EC 2.7.11.1); Endoribonuclease (EC 3.1.26.-)]	Ern1	Ire1
TRINITY_DN1655_c0_g1	0	0	0	0	0	Q5VXT5	Synaptophysin-like protein 2 (Mitsugumin-29) (Mg29)	Sypl2	Mg29
TRINITY_DN16558_c0_g1	0	0	0	0	0	Q05707	#N/A	#N/A
TRINITY_DN1657_c0_g1	0	0	0	0	0	Q9H7B4	Histone-lysine N-methyltransferase SMYD3 (EC 2.1.1.354) (SET and MYND domain-containing protein 3) (Zinc finger MYND domain-containing protein 1)	Smyd3	Zmynd1
TRINITY_DN16573_c0_g1	0	0	0	0	0	P46023	Lutropin-choriogonadotropic hormone receptor (LH/CG-R) (Luteinizing hormone receptor) (LSH-R)	Lhcgr	Lhr
TRINITY_DN16578_c0_g1	0	0	0	0	0	O60909	Beta-1,4-galactosyltransferase 2 (Beta-1,4-GalTase 2) (Beta4Gal-T2) (b4Gal-T2) (EC 2.4.1.-) (Beta-N-acetylglucosaminyl-glycolipid beta-1,4-galactosyltransferase) (Beta-N-acetylglucosaminylglycopeptide beta-1,4-galactosyltransferase) (EC 2.4.1.38) (Lactose synthase A protein) (EC 2.4.1.22) (N-acetyllactosamine synthase) (EC 2.4.1.90) (Nal synthase) (UDP-Gal:beta-GlcNAc beta-1,4-galactosyltransfera…	B4galt2
TRINITY_DN16579_c0_g1	0	0	0	0	0	Q9MZT7	Myc proto-oncogene protein (Proto-oncogene c-Myc) (Transcription factor p64)	Myc
TRINITY_DN16586_c0_g2	0	0	0	0	0	Q9DB30	Phosphorylase b kinase gamma catalytic chain, liver/testis isoform (PHK-gamma-LT) (PHK-gamma-T) (EC 2.7.11.19) (Phosphorylase kinase subunit gamma-2)	Phkg2
TRINITY_DN16589_c0_g2	0	0	0	0	0	P78382	CMP-sialic acid transporter (CMP-SA-Tr) (CMP-Sia-Tr) (CST) (Solute carrier family 35 member A1)	Slc35a1
TRINITY_DN16589_c6_g1	0	0	0	0	0	P19208	Heat shock cognate 71 kDa protein (Heat shock 70 kDa protein 8)	Hspa8	Hsc70	Hsc73
TRINITY_DN16594_c0_g1	0	0	0	0	0	P14381	LINE-1 retrotransposable element ORF2 protein (ORF2p) (Long interspersed element-1) (L1) (Retrovirus-related Pol polyprotein LINE-1) [Includes: Reverse transcriptase (EC 2.7.7.49); Endonuclease (EC 3.1.21.-)]	Pol	Gm17492
TRINITY_DN16611_c0_g1	0	0	0	0	0	Q8BHI4	#N/A	#N/A
TRINITY_DN16611_c0_g2	0	0	0	0	0	Q8CE33	#N/A	#N/A
TRINITY_DN16620_c0_g1	0	0	0	0	0	P30968	Gonadotropin-releasing hormone receptor (GnRH receptor) (GnRH-R)	Gnrhr
TRINITY_DN16626_c0_g1	0	0	0	0	0	O75132	Zinc finger BED domain-containing protein 4	Zbed4	Kiaa0637
TRINITY_DN16641_c0_g1	0	0	0	0	0	Q9C5S2	Serine/threonine-protein kinase/endoribonuclease IRE1 (Endoplasmic reticulum-to-nucleus signaling 1) (Inositol-requiring protein 1) (Ire1-alpha) (IRE1a) [Includes: Serine/threonine-protein kinase (EC 2.7.11.1); Endoribonuclease (EC 3.1.26.-)]	Ern1	Ire1
TRINITY_DN16658_c0_g1	0	0	0	0	0	A6QLK4	Transmembrane protein 8B (Protein NGX6)	Tmem8b
TRINITY_DN16661_c0_g1	0	0	0	0	0	O14975	Very long-chain acyl-CoA synthetase (VLACS) (VLCS) (EC 6.2.1.-) (Arachidonate--CoA ligase) (EC 6.2.1.15) (Fatty acid transport protein 2) (FATP-2) (Fatty-acid-coenzyme A ligase, very long-chain 1) (Long-chain-fatty-acid--CoA ligase) (EC 6.2.1.3) (Phytanate--CoA ligase) (EC 6.2.1.24) (Solute carrier family 27 member 2) (THCA-CoA ligase) (EC 6.2.1.7) (Very long-chain-fatty-acid-CoA ligase)	Slc27a2	Acsvl1	Facvl1	Fatp2	Vlacs	Vlcs
TRINITY_DN16690_c0_g1	0	0	0	0	0	P23098	Dynein heavy chain 17, axonemal (Axonemal beta dynein heavy chain 17) (Ciliary dynein heavy chain 17)	Dnah17	Dnahc17	Kiaa3028
TRINITY_DN16693_c0_g1	0	0	0	0	0	Q4R5Y2	Glutamine-dependent NAD(+) synthetase (EC 6.3.5.1) (NAD(+) synthase [glutamine-hydrolyzing]) (NAD(+) synthetase) (NH3-dependent NAD(+) synthetase-like protein)	Nadsyn1
TRINITY_DN16696_c0_g1	0	0	0	0	0	O70475	UDP-glucose 6-dehydrogenase (UDP-Glc dehydrogenase) (UDP-GlcDH) (UDPGDH) (EC 1.1.1.22)	Ugdh
TRINITY_DN16701_c2_g1	0	0	0	0	0	P79152	Cytochrome P450 3A16 (EC 1.14.14.1) (CYPIIIA16)	Cyp3a16	Cyp3a-16
TRINITY_DN1671_c0_g2	0	0	0	0	0	Q66IB8	UPF0538 protein C2orf76 homolog	0
TRINITY_DN16716_c0_g1	0	0	0	0	0	Q8BKF1	DNA-directed RNA polymerase, mitochondrial (MtRPOL) (EC 2.7.7.6)	Polrmt
TRINITY_DN16724_c0_g1	0	0	0	0	0	Q0R4E4	Regulator of G-protein signaling 4 (RGS4)	Rgs4
TRINITY_DN16738_c0_g1	0	0	0	0	0	P19217	Sulfotransferase 1C2 (ST1C2) (EC 2.8.2.-)	Sult1c2	Sult1c1
TRINITY_DN16759_c0_g1	0	0	0	0	0	Q9BEA0	Hemicentin-2	Hmcn2
TRINITY_DN16768_c0_g1	0	0	0	0	0	Q9NBX4	#N/A	#N/A
TRINITY_DN16778_c0_g1	0	0	0	0	0	A4Q9F0	Tubulin polyglutamylase TTLL7 (EC 6.-.-.-) (Tubulin--tyrosine ligase-like protein 7) (mTTLL7)	Ttll7
TRINITY_DN16787_c0_g3	0	0	0	0	0	Q99J83	Autophagy protein 5 (APG5-like)	Atg5	Apg5l
TRINITY_DN16798_c0_g2	0	0	0	0	0	Q5XK91	Tenascin (TN) (Hexabrachion) (Tenascin-C) (TN-C)	Tnc	Hxb
TRINITY_DN168_c0_g1	0	0	0	0	0	Q9CQ36	DNA polymerase epsilon subunit 4 (DNA polymerase II subunit 4) (DNA polymerase epsilon subunit p12)	Pole4
TRINITY_DN1680_c1_g2	0	0	0	0	0	O00187	Mannan-binding lectin serine protease 2 (EC 3.4.21.104) (MBL-associated serine protease 2) (Mannose-binding protein-associated serine protease 2) (MASP-2) [Cleaved into: Mannan-binding lectin serine protease 2 A chain; Mannan-binding lectin serine protease 2 B chain]	Masp2
TRINITY_DN16817_c0_g1	0	0	0	0	0	P97259	Alpha-1,6-mannosylglycoprotein 6-beta-N-acetylglucosaminyltransferase A (EC 2.4.1.155) (Alpha-mannoside beta-1,6-N-acetylglucosaminyltransferase) (GlcNAc-T V) (GNT-V) (Mannoside acetylglucosaminyltransferase 5) (N-acetylglucosaminyl-transferase V) [Cleaved into: Secreted alpha-1,6-mannosylglycoprotein 6-beta-N-acetylglucosaminyltransferase A (Secreted beta-1,6-N-acetylglucosaminyltransferase V) (…	Mgat5
TRINITY_DN16836_c0_g1	0	0	0	0	0	Q04637	Eukaryotic translation initiation factor 4 gamma 1 (eIF-4-gamma 1) (eIF-4G 1) (eIF-4G1)	Eif4g1
TRINITY_DN16844_c0_g1	0	0	0	0	0	O14880	Microsomal glutathione S-transferase 3 (Microsomal GST-3) (Glutathione peroxidase MGST3) (EC 1.11.1.-) (Microsomal glutathione S-transferase III) (Microsomal GST-III)	Mgst3
TRINITY_DN1685_c0_g1	0	0	0	0	0	P56433	Alpha-(1,3)-fucosyltransferase 4 (EC 2.4.1.-) (Fucosyltransferase 4) (Fucosyltransferase IV) (Fuc-TIV) (FucT-IV) (Galactoside 3-L-fucosyltransferase)	Fut4	Elft
TRINITY_DN16854_c0_g1	0	0	0	0	0	Q8R3D1	TBC1 domain family member 13	Tbc1d13
TRINITY_DN16864_c1_g1	0	0	0	0	0	Q8JHV9	Baculoviral IAP repeat-containing protein 3 (EC 2.3.2.27) (Cellular inhibitor of apoptosis 2) (C-IAP2) (Inhibitor of apoptosis protein 1) (mIAP1) (RING-type E3 ubiquitin transferase BIRC3)	Birc3
TRINITY_DN1688_c0_g2	0	0	0	0	0	Q8TD16	Protein bicaudal D homolog 2 (Bic-D 2)	Bicd2	Kiaa0699
TRINITY_DN1688_c0_g3	0	0	0	0	0	A6H757	Lysophosphatidic acid phosphatase type 6 (EC 3.1.3.2) (Acid phosphatase 6, lysophosphatidic) (Acid phosphatase-like protein 1) (PACPL1)	Acp6	Acpl1	Lpap
TRINITY_DN16883_c0_g1	0	0	0	0	0	Q5ZK92	Spastin (EC 5.6.1.1)	Spast	Kiaa1083	Spg4
TRINITY_DN16884_c0_g2	0	0	0	0	0	Q7TT28	RNA exonuclease 1 homolog (EC 3.1.-.-) (Transcription elongation factor B polypeptide 3-binding protein 1)	Rexo1	Kiaa1138	Tceb3bp1
TRINITY_DN16890_c0_g1	0	0	0	0	0	P21439	Phosphatidylcholine translocator ABCB4 (EC 7.6.2.1) (ATP-binding cassette sub-family B member 4) (Multidrug resistance protein 2) (Multidrug resistance protein 3) (P-glycoprotein 2) (P-glycoprotein 3)	Abcb4	Mdr2	Pgy-2	Pgy2
TRINITY_DN16891_c0_g1	0	0	0	0	0	Q92847	Growth hormone secretagogue receptor type 1 (GHS-R) (GH-releasing peptide receptor) (GHRP) (Ghrelin receptor)	Ghsr
TRINITY_DN1690_c0_g1	0	0	0	0	0	P48884	Cytochrome b (Complex III subunit 3) (Complex III subunit III) (Cytochrome b-c1 complex subunit 3) (Ubiquinol-cytochrome-c reductase complex cytochrome b subunit)	Mt-Cyb	Cob	Cytb	mt-Cytb	Mtcyb
TRINITY_DN16900_c0_g1	0	0	0	0	0	Q9JJ05	Glycoprotein-N-acetylgalactosamine 3-beta-galactosyltransferase 1 (EC 2.4.1.122) (Core 1 O-glycan T-synthase) (T-syn) (Core 1 UDP-galactose:N-acetylgalactosamine-alpha-R beta 1,3-galactosyltransferase 1) (Core 1 beta1,3-galactosyltransferase 1) (C1GalT1) (Core 1 beta3-Gal-T1)	C1galt1	Plt1
TRINITY_DN16905_c0_g1	0	0	0	0	0	P10730	Atrial natriuretic peptide receptor 3 (Atrial natriuretic peptide clearance receptor) (Atrial natriuretic peptide receptor type C) (ANP-C) (ANPR-C) (NPR-C) (EF-2)	Npr3
TRINITY_DN16908_c0_g2	0	0	0	0	0	Q05546	Tenascin-R (TN-R) (Janusin) (Neural recognition molecule J1-160/180) (Restrictin)	Tnr
TRINITY_DN1691_c0_g1	0	0	0	0	0	Q9HAP6	Protein lin-7 homolog B (Lin-7B) (Mammalian lin-seven protein 2) (MALS-2) (Vertebrate lin-7 homolog 2) (Veli-2)	Lin7b	Mals2	Veli2
TRINITY_DN16927_c0_g1	0	0	0	0	0	Q9NBX4	#N/A	#N/A
TRINITY_DN1696_c0_g1	0	0	0	0	0	Q7RTR2	#N/A	#N/A
TRINITY_DN16963_c0_g1	0	0	0	0	0	P49758	Regulator of G-protein signaling 6 (RGS6)	Rgs6
TRINITY_DN1698_c0_g1	0	0	0	0	0	B0S6R1	Nck-associated protein 1 (NAP 1) (Brain protein H19) (MH19) (Membrane-associated protein HEM-2) (p125Nap1)	Nckap1	Hem2	Kiaa0587	Nap1
TRINITY_DN17002_c0_g1	0	0	0	0	0	Q5SW45	Meckel syndrome type 1 protein homolog	Mks1
TRINITY_DN17015_c1_g1	0	0	0	0	0	O75897	Sulfotransferase 1C1 (ST1C1) (EC 2.8.2.-) (Phenol sulfotransferase)	Sult1c1	Sult1a2
TRINITY_DN17015_c1_g2	0	0	0	0	0	Q8JG30	Sulfotransferase 1C2 (ST1C2) (EC 2.8.2.-)	Sult1c2	Sult1c1
TRINITY_DN17016_c0_g1	0	0	0	0	0	Q8C9E8	Calcium homeostasis modulator protein 6 (Protein FAM26F)	Calhm6	Fam26f
TRINITY_DN1702_c0_g1	0	0	0	0	0	Q28CZ7	D-ribitol-5-phosphate cytidylyltransferase (EC 2.7.7.40) (2-C-methyl-D-erythritol 4-phosphate cytidylyltransferase-like protein) (Isoprenoid synthase domain-containing protein)	Crppa	Ispd
TRINITY_DN17042_c0_g1	0	0	0	0	0	P24821	Tenascin (TN) (Hexabrachion) (Tenascin-C) (TN-C)	Tnc	Hxb
TRINITY_DN17047_c0_g1	0	0	0	0	0	Q8R0T6	Adhesion G protein-coupled receptor G3 (G-protein coupled receptor 97)	Adgrg3	Gpr97
TRINITY_DN17048_c0_g1	0	0	0	0	0	Q3SZP0	Interferon regulatory factor 1 (IRF-1)	Irf1
TRINITY_DN17049_c0_g2	0	0	0	0	0	Q00341	#N/A	#N/A
TRINITY_DN17055_c0_g1	0	0	0	0	0	Q96DM1	#N/A	#N/A
TRINITY_DN17059_c0_g4	0	0	0	0	0	Q94HW2	#N/A	#N/A
TRINITY_DN17063_c0_g1	0	0	0	0	0	O95628	CCR4-NOT transcription complex subunit 4 (EC 2.3.2.27) (CCR4-associated factor 4) (E3 ubiquitin-protein ligase CNOT4) (Potential transcriptional repressor NOT4Hp) (RING-type E3 ubiquitin transferase CNOT4)	Cnot4	Not4
TRINITY_DN17064_c0_g1	0	0	0	0	0	Q4ADV7	Guanine nucleotide exchange factor subunit RIC1 (Protein RIC1 homolog) (RAB6A-GEF complex partner protein 1)	Ric1	Kiaa1432
TRINITY_DN1707_c0_g1	0	0	0	0	0	Q566T0	Polycomb protein EED	Eed
TRINITY_DN17073_c0_g1	0	0	0	0	0	P02241	#N/A	#N/A
TRINITY_DN17091_c0_g2	0	0	0	0	0	A6NK53	Zinc finger protein 235 (Zinc finger protein 93) (Zfp-93)	Znf235	Zfp93
TRINITY_DN17091_c0_g4	0	0	0	0	0	Q8TC21	Zinc finger protein 250 (Zinc finger protein 647)	Znf250	Zfp647	Znf647
TRINITY_DN171_c0_g1	0	0	0	0	0	Q13439	Golgin subfamily A member 4 (tGolgin-1)	Golga4
TRINITY_DN17129_c0_g1	0	0	0	0	0	C0HL12	#N/A	#N/A
TRINITY_DN1713_c0_g1	0	0	0	0	0	P24799	Guanine nucleotide-binding protein G(s) subunit alpha isoforms short (Adenylate cyclase-stimulating G alpha protein)	Gnas	Gnas1	MNCb-5546
TRINITY_DN17132_c0_g1	0	0	0	0	0	Q5RDM6	Ras-related protein Rap-1b (EC 3.6.5.2) (GTP-binding protein smg p21B)	Rap1b
TRINITY_DN17134_c0_g1	0	0	0	0	0	P15988	#N/A	#N/A
TRINITY_DN17134_c0_g2	0	0	0	0	0	P20702	#N/A	#N/A
TRINITY_DN17169_c0_g1	0	0	0	0	0	O75460	Serine/threonine-protein kinase STK11 (EC 2.7.11.1) (Liver kinase B1 homolog) (LKB1) (mLKB1)	Stk11	Lkb1
TRINITY_DN17191_c0_g1	0	0	0	0	0	Q8IX06	RNA exonuclease 1 homolog (EC 3.1.-.-) (Transcription elongation factor B polypeptide 3-binding protein 1)	Rexo1	Kiaa1138	Tceb3bp1
TRINITY_DN17194_c0_g1	0	0	0	0	0	Q96NI8	Zinc finger protein 28 (Zfp-28) (Protein mKR5)	Zfp28	Mkr5	Zfp-28
TRINITY_DN17197_c0_g1	0	0	0	0	0	Q55EX9	#N/A	#N/A
TRINITY_DN172_c0_g1	0	0	0	0	0	Q5S1U6	Interferon-related developmental regulator 1 (Nerve growth factor-inducible protein PC4) (TPA-induced sequence 7) (TIS7 protein)	Ifrd1	Tis7
TRINITY_DN1721_c0_g1	0	0	0	0	0	Q5R8W6	Luc7-like protein 3 (Cisplatin resistance-associated-overexpressed protein)	Luc7l3	Crop
TRINITY_DN17217_c0_g1	0	0	0	0	0	Q96RW7	Hemicentin-1 (Fibulin-6) (FIBL-6)	Hmcn1
TRINITY_DN17220_c0_g1	0	0	0	0	0	O00370	LINE-1 retrotransposable element ORF2 protein (ORF2p) (Long interspersed element-1) (L1) (Retrovirus-related Pol polyprotein LINE-1) [Includes: Reverse transcriptase (EC 2.7.7.49); Endonuclease (EC 3.1.21.-)]	Pol	Gm17492
TRINITY_DN17241_c0_g1	0	0	0	0	0	Q9VCJ8	Serine protease 48 (EC 3.4.21.-) (Epidermis-specific serine protease-like protein)	Prss48	Esspl	Gm1019
TRINITY_DN1725_c0_g1	0	0	0	0	0	Q8BKN6	Heparan sulfate glucosamine 3-O-sulfotransferase 3A1 (EC 2.8.2.23) (Heparan sulfate D-glucosaminyl 3-O-sulfotransferase 3A1) (Heparan sulfate 3-O-sulfotransferase 3A1)	Hs3st3a1	3ost3a1	Hs3st3a
TRINITY_DN17250_c0_g1	0	0	0	0	0	Q9UKG1	DCC-interacting protein 13-alpha (Dip13-alpha) (Adapter protein containing PH domain, PTB domain and leucine zipper motif 1)	Appl1	Dip13a	Kiaa1428
TRINITY_DN17264_c0_g1	0	0	0	0	0	P68827	N-acetylglucosamine-1-phosphodiester alpha-N-acetylglucosaminidase (EC 3.1.4.45) (Mannose 6-phosphate-uncovering enzyme) (Phosphodiester alpha-GlcNAcase)	Nagpa
TRINITY_DN17266_c0_g1	0	0	0	0	0	Q7M3K2	#N/A	#N/A
TRINITY_DN17283_c0_g1	0	0	0	0	0	A1E2V0	Baculoviral IAP repeat-containing protein 2 (EC 2.3.2.27) (Cellular inhibitor of apoptosis 1) (C-IAP1) (Inhibitor of apoptosis protein 2) (mIAP2) (RING-type E3 ubiquitin transferase BIRC2)	Birc2
TRINITY_DN17294_c0_g1	0	0	0	0	0	Q5RAS8	#N/A	#N/A
TRINITY_DN17306_c0_g1	0	0	0	0	0	Q55EX9	#N/A	#N/A
TRINITY_DN17307_c0_g1	0	0	0	0	0	O15973	Melatonin receptor type 1A (Mel-1A-R) (Mel1a receptor)	Mtnr1a
TRINITY_DN1732_c0_g1	0	0	0	0	0	Q5R478	AP-3 complex subunit mu-1 (AP-3 adaptor complex mu3A subunit) (Adaptor-related protein complex 3 subunit mu-1) (Mu-adaptin 3A) (Mu3A-adaptin)	Ap3m1
TRINITY_DN17330_c0_g1	0	0	0	0	0	E9Q555	E3 ubiquitin-protein ligase RNF213 (EC 2.3.2.27) (EC 3.6.4.-) (Mysterin) (RING finger protein 213) (RING-type E3 ubiquitin transferase RNF213)	Rnf213	Mystr
TRINITY_DN1734_c0_g1	0	0	0	0	0	Q6EE31	T-complex protein 1 subunit theta (TCP-1-theta) (CCT-theta)	Cct8	Cctq
TRINITY_DN17340_c0_g1	0	0	0	0	0	Q9JIG1	4-galactosyl-N-acetylglucosaminide 3-alpha-L-fucosyltransferase 9 (EC 2.4.1.152) (Fucosyltransferase 9) (Fucosyltransferase IX) (Fuc-TIX) (FucT-IX) (Galactoside 3-L-fucosyltransferase)	Fut9
TRINITY_DN1737_c0_g1	0	0	0	0	0	P03966	N-myc proto-oncogene protein	Mycn	Nmyc	Nmyc1
TRINITY_DN1738_c0_g2	0	0	0	0	0	Q53G59	Kelch-like protein 12 (CUL3-interacting protein 1)	Klhl12	C3ip1
TRINITY_DN1738_c3_g1	0	0	0	0	0	Q53G59	Kelch-like protein 12 (CUL3-interacting protein 1)	Klhl12	C3ip1
TRINITY_DN174_c0_g1	0	0	0	0	0	P51151	Ras-related protein Rab-9B	Rab9b
TRINITY_DN1740_c0_g1	0	0	0	0	0	Q6DCQ0	Serine/threonine-protein phosphatase 4 regulatory subunit 2	Ppp4r2
TRINITY_DN17406_c0_g1	0	0	0	0	0	Q921M4	Golgin subfamily A member 2 (130 kDa cis-Golgi matrix protein) (GM130)	Golga2
TRINITY_DN17429_c0_g1	0	0	0	0	0	Q58DT5	ELMO domain-containing protein 3 (RNA-binding motif and ELMO domain-containing protein 1)	Elmod3	Rbed1
TRINITY_DN17442_c0_g1	0	0	0	0	0	P10073	Zinc finger protein 239 (Zfp-239) (Zinc finger protein MOK-2)	Znf239	Mok-2	Mok2	Zfp239
TRINITY_DN1745_c0_g1	0	0	0	0	0	O18404	3-hydroxyacyl-CoA dehydrogenase type-2 (EC 1.1.1.35) (17-beta-hydroxysteroid dehydrogenase 10) (17-beta-HSD 10) (EC 1.1.1.51) (3-hydroxy-2-methylbutyryl-CoA dehydrogenase) (EC 1.1.1.178) (3-hydroxyacyl-CoA dehydrogenase type II) (Endoplasmic reticulum-associated amyloid beta-peptide-binding protein) (Mitochondrial ribonuclease P protein 2) (Mitochondrial RNase P protein 2) (Type II HADH)	Hsd17b10	Erab	Hadh2
TRINITY_DN17456_c0_g1	0	0	0	0	0	Q9UQP3	Fibrinogen C domain-containing protein 1	Fibcd1
TRINITY_DN17456_c0_g3	0	0	0	0	0	P10039	Tenascin (TN) (Hexabrachion) (Tenascin-C) (TN-C)	Tnc	Hxb
TRINITY_DN1746_c0_g1	0	0	0	0	0	Q7ZX22	GATOR complex protein WDR24 (WD repeat-containing protein 24)	Wdr24
TRINITY_DN17464_c0_g1	0	0	0	0	0	O35474	EGF-like repeat and discoidin I-like domain-containing protein 3 (Developmentally-regulated endothelial cell locus 1 protein) (Integrin-binding protein DEL1)	Edil3	Del1
TRINITY_DN17484_c0_g1	0	0	0	0	0	O00628	Peroxisomal targeting signal 2 receptor (PTS2 receptor) (Peroxin-7)	Pex7
TRINITY_DN17491_c0_g1	0	0	0	0	0	A0A0R4IBK5	E3 ubiquitin-protein ligase RNF213 (EC 2.3.2.27) (EC 3.6.4.-) (Mysterin) (RING finger protein 213) (RING-type E3 ubiquitin transferase RNF213)	Rnf213	Mystr
TRINITY_DN17495_c0_g1	0	0	0	0	0	Q8CGZ0	Calcium homeostasis endoplasmic reticulum protein (SR-related CTD-associated factor 6)	Cherp	Scaf6
TRINITY_DN17507_c0_g1	0	0	0	0	0	P46023	Relaxin receptor 1 (Leucine-rich repeat-containing G-protein coupled receptor 7) (Relaxin family peptide receptor 1)	Rxfp1	Gm1018	Lgr7
TRINITY_DN17509_c0_g1	0	0	0	0	0	P43140	Beta-2 adrenergic receptor (Beta-2 adrenoreceptor) (Beta-2 adrenoceptor)	Adrb2	Adrb2r
TRINITY_DN17517_c0_g1	0	0	0	0	0	Q2TBI2	Peroxynitrite isomerase THAP4 (EC 5.99.-.-) (THAP domain-containing protein 4)	Thap4
TRINITY_DN17524_c0_g1	0	0	0	0	0	Q5TYQ1	Protein zyg-11 homolog B	Zyg11b	Kiaa1730
TRINITY_DN17532_c0_g1	0	0	0	0	0	P28338	Glutathione S-transferase theta-4 (EC 2.5.1.18) (GST class-theta-4)	Gstt4
TRINITY_DN17545_c0_g5	0	0	0	0	0	Q8N695	Sodium-coupled monocarboxylate transporter 1 (Electrogenic sodium monocarboxylate cotransporter) (Solute carrier family 5 member 8)	Slc5a8	Smct	Smct1
TRINITY_DN17554_c0_g1	0	0	0	0	0	P49286	#N/A	#N/A
TRINITY_DN17559_c0_g1	0	0	0	0	0	Q8BGD4	Solute carrier organic anion transporter family member 4C1 (Oatp-R) (Solute carrier family 21 member 20)	Slco4c1	Oatp4c1	Slc21a20
TRINITY_DN17569_c0_g2	0	0	0	0	0	Q28J92	#N/A	#N/A
TRINITY_DN1757_c0_g1	0	0	0	0	0	B0JYZ2	Peroxisomal membrane protein PEX16 (Peroxin-16) (Peroxisomal biogenesis factor 16)	Pex16
TRINITY_DN17592_c0_g1	0	0	0	0	0	Q5U374	#N/A	#N/A
TRINITY_DN17604_c0_g1	0	0	0	0	0	A7M7B9	Endonuclease III-like protein 1 (EC 3.2.2.-) (EC 4.2.99.18) (Bifunctional DNA N-glycosylase/DNA-(apurinic or apyrimidinic site) lyase) (DNA glycosylase/AP lyase)	Nthl1	Nth1
TRINITY_DN1763_c0_g1	0	0	0	0	0	Q1LWH4	Fanconi-associated nuclease 1 (EC 3.1.21.-) (EC 3.1.4.1) (FANCD2/FANCI-associated nuclease 1) (mFAN1) (Myotubularin-related protein 15)	Fan1	Kiaa1018	Mtmr15
TRINITY_DN17645_c0_g1	0	0	0	0	0	O88799	#N/A	#N/A
TRINITY_DN17660_c0_g1	0	0	0	0	0	Q8IWX7	Protein unc-45 homolog B (Unc-45B)	Unc45b	Cmya4
TRINITY_DN17680_c0_g1	0	0	0	0	0	Q8CB62	Centrobin (Centrosomal BRCA2-interacting protein) (LYST-interacting protein 8)	Cntrob	Lip8
TRINITY_DN17687_c0_g1	0	0	0	0	0	Q9VUX2	E3 ubiquitin-protein ligase MIB1 (EC 2.3.2.27) (DAPK-interacting protein 1) (DIP-1) (Mind bomb homolog 1) (RING-type E3 ubiquitin transferase MIB1)	Mib1	Dip1	Kiaa1323	Mib
TRINITY_DN17727_c0_g1	0	0	0	0	0	Q8BKN5	Gamma-tubulin complex component 5 (GCP-5)	Tubgcp5	Kiaa1899
TRINITY_DN17729_c0_g1	0	0	0	0	0	P84104	Serine/arginine-rich splicing factor 3 (Pre-mRNA-splicing factor SRP20) (Protein X16) (Splicing factor, arginine/serine-rich 3)	Srsf3	Sfrs3	Srp20	X16
TRINITY_DN17746_c0_g1	0	0	0	0	0	Q9JL19	Nuclear receptor coactivator 6 (Activating signal cointegrator 2) (ASC-2) (Amplified in breast cancer protein 3) (Cancer-amplified transcriptional coactivator ASC-2) (Nuclear receptor coactivator RAP250) (NRC) (Nuclear receptor-activating protein, 250 kDa) (Peroxisome proliferator-activated receptor-interacting protein) (PPAR-interacting protein) (Thyroid hormone receptor-binding protein)	Ncoa6	Aib3	Prip	Rap250	Trbp
TRINITY_DN17761_c0_g1	0	0	0	0	0	Q5VYK3	Proteasome adapter and scaffold protein ECM29 (Proteasome-associated protein ECM29 homolog)	Ecpas	Ecm29	Kiaa0368
TRINITY_DN17785_c0_g1	0	0	0	0	0	Q02723	Death-associated protein kinase 2 (DAP kinase 2) (EC 2.7.11.1) (DAP-kinase-related protein 1) (DRP-1)	Dapk2
TRINITY_DN17787_c0_g1	0	0	0	0	0	Q91V88	Nephronectin (Preosteoblast EGF-like repeat protein with MAM domain)	Npnt	Neph1	Poem
TRINITY_DN17808_c0_g1	0	0	0	0	0	P45481	Histone lysine acetyltransferase CREBBP (EC 2.3.1.48) (Protein-lysine acetyltransferase CREBBP) (EC 2.3.1.-)	Crebbp	Cbp
TRINITY_DN17814_c0_g1	0	0	0	0	0	Q86WI1	Fibrocystin-L (Polycystic kidney and hepatic disease 1-like protein 1) (PKHD1-like protein 1) (Protein D86)	Pkhd1l1
TRINITY_DN1782_c0_g1	0	0	0	0	0	O94913	#N/A	#N/A
TRINITY_DN17825_c0_g2	0	0	0	0	0	Q14517	#N/A	#N/A
TRINITY_DN17832_c0_g1	0	0	0	0	0	O88310	Intelectin-1a (Galactofuranose-binding lectin) (Intestinal lactoferrin receptor)	Itln1	Intl	Itln	Itln1a	Itlna
TRINITY_DN17838_c0_g1	0	0	0	0	0	Q95LN3	Atlastin-2 (EC 3.6.5.-) (ADP-ribosylation factor-like protein 6-interacting protein 2) (ARL-6-interacting protein 2) (Aip-2)	Atl2	Arl6ip2
TRINITY_DN17842_c0_g1	0	0	0	0	0	Q9BEA0	#N/A	#N/A
TRINITY_DN1785_c0_g1	0	0	0	0	0	Q7ZUV7	BRCA2-interacting transcriptional repressor EMSY	Emsy
TRINITY_DN17868_c0_g1	0	0	0	0	0	Q498H0	Sister chromatid cohesion protein PDS5 homolog B (Androgen-induced proliferation inhibitor) (Androgen-induced prostate proliferative shutoff-associated protein AS3)	Pds5b	Aprin	As3	Kiaa0979
TRINITY_DN1790_c0_g1	0	0	0	0	0	Q7KMJ6	Putative RNA-binding protein 15B (RNA-binding motif protein 15B)	Rbm15b
TRINITY_DN17910_c0_g1	0	0	0	0	0	Q9Z2H4	Leucine-rich repeat-containing G-protein coupled receptor 4 (G-protein coupled receptor 48)	Lgr4	Gpr48
TRINITY_DN17956_c0_g1	0	0	0	0	0	Q9NBX4	#N/A	#N/A
TRINITY_DN17957_c0_g1	0	0	0	0	0	Q4R632	Cytosolic carboxypeptidase 3 (EC 3.4.17.-) (ATP/GTP-binding protein-like 3)	Agbl3	Ccp3
TRINITY_DN17969_c2_g1	0	0	0	0	0	Q5VUG0	Scm-like with four MBT domains protein 2	Sfmbt2	Kiaa1617
TRINITY_DN17970_c0_g1	0	0	0	0	0	Q96T49	Protein phosphatase 1 regulatory inhibitor subunit 16B (CAAX box protein TIMAP) (TGF-beta-inhibited membrane-associated protein)	Ppp1r16b
TRINITY_DN1802_c0_g1	0	0	0	0	0	A0AUR5	Ubiquitin carboxyl-terminal hydrolase MINDY-3 (EC 3.4.19.12) (Deubiquitinating enzyme MINDY-3) (Protein CARP)	MINDY3	Carp	Fam188a
TRINITY_DN18020_c0_g1	0	0	0	0	0	Q0DAE4	Glutaredoxin-2, mitochondrial	Glrx2	Grx2
TRINITY_DN18045_c0_g1	0	0	0	0	0	O55040	Neuromedin-U receptor 1 (NMU-R1) (G-protein coupled receptor 66) (G-protein coupled receptor FM-3)	Nmur1	Gpr66
TRINITY_DN1806_c0_g1	0	0	0	0	0	F1QVR8	rRNA N6-adenosine-methyltransferase METTL5 (EC 2.1.1.-) (Methyltransferase-like protein 5)	Mettl5
TRINITY_DN1808_c0_g1	0	0	0	0	0	Q92614	Unconventional myosin-XVIIIa (Molecule associated with JAK3 N-terminus) (MAJN) (Myosin containing a PDZ domain) (Surfactant protein receptor SP-R210) (SP-R210)	Myo18a	Myspdz
TRINITY_DN18095_c0_g2	0	0	0	0	0	P07996	#N/A	#N/A
TRINITY_DN18097_c0_g1	0	0	0	0	0	Q9UMZ2	Synergin gamma (AP1 subunit gamma-binding protein 1) (Gamma-synergin)	Synrg	Ap1gbp1	Syng
TRINITY_DN18099_c0_g1	0	0	0	0	0	P34565	#N/A	#N/A
TRINITY_DN18111_c0_g1	0	0	0	0	0	Q8BWQ5	Serine/threonine-protein kinase DCLK3 (EC 2.7.11.1) (CLICK-I and II-related) (CLr) (Doublecortin-like and CAM kinase-like 3) (Doublecortin-like kinase 3)	Dclk3	Dcamkl3
TRINITY_DN18118_c0_g1	0	0	0	0	0	Q9D1U0	Grifin (Galectin-related inter-fiber protein)	Grifin
TRINITY_DN18121_c0_g1	0	0	0	0	0	J3SEZ3	Ectonucleotide pyrophosphatase/phosphodiesterase family member 3 (E-NPP 3) (Phosphodiesterase I beta) (PD-Ibeta) (Phosphodiesterase I/nucleotide pyrophosphatase 3) (CD antigen CD203c) [Includes: Alkaline phosphodiesterase I (EC 3.1.4.1); Nucleotide pyrophosphatase (NPPase) (EC 3.6.1.9) (Nucleotide diphosphatase)]	Enpp3
TRINITY_DN1815_c0_g1	0	0	0	0	0	Q9JHB4	WD repeat-containing protein 31 (Spermatid WD repeat-containing protein) (spWD)	Wdr31
TRINITY_DN18158_c0_g1	0	0	0	0	0	Q14833	Metabotropic glutamate receptor 4 (mGluR4)	Grm4	Gprc1d	Mglur4
TRINITY_DN18180_c0_g1	0	0	0	0	0	Q91ZW7	#N/A	#N/A
TRINITY_DN18189_c1_g1	0	0	0	0	0	Q5UNS9	Collagen alpha-5(VI) chain (Collagen alpha-1(XXIX) chain)	Col6a5	Col29a1	Gm7455
TRINITY_DN1822_c0_g1	0	0	0	0	0	Q4FZP2	Methylthioribose-1-phosphate isomerase (M1Pi) (MTR-1-P isomerase) (EC 5.3.1.23) (S-methyl-5-thioribose-1-phosphate isomerase) (Translation initiation factor eIF-2B subunit alpha/beta/delta-like protein)	Mri1
TRINITY_DN18231_c0_g2	0	0	0	0	0	G5ED84	Kelch-like protein 20 (Kelch-like ECT2-interacting protein)	Klhl20	Kiaa4210	Kleip
TRINITY_DN18231_c1_g1	0	0	0	0	0	Q96CT2	Kelch-like protein 24 (Kainate receptor-interacting protein for GluR6) (KRIP6)	Klhl24
TRINITY_DN18231_c2_g1	0	0	0	0	0	Q9NXS3	Kelch-like protein 28 (BTB/POZ domain-containing protein 5)	Klhl28	Btbd5
TRINITY_DN18237_c0_g1	0	0	0	0	0	Q61555	Fibrillin-2 [Cleaved into: Fibrillin-2 C-terminal peptide]	Fbn2	Fbn-2
TRINITY_DN18288_c0_g1	0	0	0	0	0	Q7ZV22	S-methyl-5'-thioadenosine phosphorylase (EC 2.4.2.28) (5'-methylthioadenosine phosphorylase) (MTA phosphorylase) (MTAP) (MTAPase)	Mtap
TRINITY_DN18322_c0_g1	0	0	0	0	0	Q9NBX4	#N/A	#N/A
TRINITY_DN18335_c0_g1	0	0	0	0	0	Q96AY4	Tetratricopeptide repeat protein 28 (TPR repeat protein 28)	Ttc28	Kiaa1043	Tprbk
TRINITY_DN1834_c0_g2	0	0	0	0	0	Q9DA39	Protein lifeguard 4 (Transmembrane BAX inhibitor motif-containing protein 4) (Z-protein)	Tmbim4	Lfg4
TRINITY_DN18355_c0_g1	0	0	0	0	0	E9Q4F2	#N/A	#N/A
TRINITY_DN18358_c1_g1	0	0	0	0	0	Q8N4W9	Zinc finger protein 235 (Zinc finger protein 93) (Zfp-93)	Znf235	Zfp93
TRINITY_DN18363_c0_g2	0	0	0	0	0	P33703	#N/A	#N/A
TRINITY_DN1837_c0_g1	0	0	0	0	0	O43432	Eukaryotic translation initiation factor 4 gamma 3 (eIF-4-gamma 3) (eIF-4G 3) (eIF4G 3) (eIF-4-gamma II) (eIF4GII)	Eif4g3
TRINITY_DN18376_c0_g1	0	0	0	0	0	Q8WWU7	Intelectin-1a (Galactofuranose-binding lectin) (Intestinal lactoferrin receptor)	Itln1	Intl	Itln	Itln1a	Itlna
TRINITY_DN184_c1_g1	0	0	0	0	0	Q9LTD8	Metal transporter CNNM2 (Ancient conserved domain-containing protein 2) (mACDP2) (Cyclin-M2)	Cnnm2	Acdp2
TRINITY_DN1840_c0_g1	0	0	0	0	0	Q8BX09	Retinoblastoma-binding protein 5 (RBBP-5)	Rbbp5
TRINITY_DN18405_c0_g1	0	0	0	0	0	A5PKK7	RAB6-interacting golgin (N-terminal kinase-like-binding protein 1) (NTKL-BP1) (NTKL-binding protein 1) (mNTKL-BP1) (SCY1-like 1-binding protein 1) (SCYL1-BP1) (SCYL1-binding protein 1)	Gorab	Ntklbp1	Scyl1bp1
TRINITY_DN18424_c0_g1	0	0	0	0	0	Q5PQ76	Uncharacterized protein C1orf50 homolog	0
TRINITY_DN18426_c0_g1	0	0	0	0	0	Q5BKR2	Sodium/hydrogen exchanger 9B2 (NHA-oc) (Na(+)/H(+) exchanger NHA2) (Na(+)/H(+) exchanger-like domain-containing protein 2) (NHE domain-containing protein 2) (Soditlum/hydrogen exchanger-like domain-containing protein 2) (Solute carrier family 9 subfamily B member 2)	Slc9b2	Nha2	Nhedc2
TRINITY_DN18435_c0_g1	0	0	0	0	0	Q556Q3	#N/A	#N/A
TRINITY_DN1850_c0_g2	0	0	0	0	0	Q9NVM9	Integrator complex subunit 13 (Cell cycle regulator Mat89Bb homolog) (Protein asunder homolog) (Spermatogenesis-associated protein 30)	IntS13	Asun	Spata30
TRINITY_DN18500_c0_g1	0	0	0	0	0	Q6IMA3	Ras-like protein family member 11A (EC 3.6.5.2)	Rasl11a
TRINITY_DN18532_c0_g1	0	0	0	0	0	O88307	Sortilin-related receptor (Gp250) (Low-density lipoprotein receptor relative with 11 ligand-binding repeats) (LDLR relative with 11 ligand-binding repeats) (LR11) (SorLA-1) (Sorting protein-related receptor containing LDLR class A repeats) (mSorLA)	Sorl1
TRINITY_DN18541_c0_g1	0	0	0	0	0	Q9WUW9	Sulfotransferase 1C2 (ST1C2) (EC 2.8.2.-)	Sult1c2	Sult1c1
TRINITY_DN18550_c0_g1	0	0	0	0	0	Q8HYC0	#N/A	#N/A
TRINITY_DN185570_c0_g1	0	0	0	0	0	Q7YTC2	Homeobox protein orthopedia	Otp
TRINITY_DN18559_c0_g1	0	0	0	0	0	A0A0R4IBK5	#N/A	#N/A
TRINITY_DN1856_c0_g1	0	0	0	0	0	O60306	RNA helicase aquarius (EC 3.6.4.13) (Intron-binding protein of 160 kDa)	Aqr	Kiaa0560
TRINITY_DN18560_c0_g1	0	0	0	0	0	C6JUN9	#N/A	#N/A
TRINITY_DN18565_c0_g1	0	0	0	0	0	E9QAM5	Helicase with zinc finger domain 2 (EC 3.6.4.-) (PPAR-gamma DNA-binding domain-interacting protein 1) (PDIP1) (PPAR-gamma DBD-interacting protein 1)	Helz2
TRINITY_DN18569_c0_g2	0	0	0	0	0	Q6BD04	Somatostatin receptor type 1 (SS-1-R) (SS1-R) (SS1R) (SRIF-2)	Sstr1	Smstr1
TRINITY_DN18571_c0_g1	0	0	0	0	0	Q0V9D9	Cytochrome c oxidase assembly factor 7 (Beta-lactamase hcp-like protein) (Respiratory chain assembly factor 1) (Sel1 repeat-containing protein 1)	Coa7	Selrc1
TRINITY_DN18573_c0_g1	0	0	0	0	0	Q64459	Cytochrome P450 3A11 (EC 1.14.14.1) (CYPIIIA11) (Cytochrome P-450IIIAM1) (Cytochrome P-450UT)	Cyp3a11	Cyp3a-11
TRINITY_DN1858_c0_g1	0	0	0	0	0	Q0V8C2	Exocyst complex component 3 (Exocyst complex component Sec6)	Exoc3	Sec6l1
TRINITY_DN18593_c0_g1	0	0	0	0	0	Q9Y6W3	Calpain-7 (EC 3.4.22.-) (PalB homolog) (PalBH)	Capn7	Palbh
TRINITY_DN18606_c0_g1	0	0	0	0	0	Q9JI74	Kelch-like protein 1	Klhl1
TRINITY_DN1861_c0_g1	0	0	0	0	0	Q8TBH0	Arrestin domain-containing protein 2	Arrdc2
TRINITY_DN18619_c0_g1	0	0	0	0	0	Q8AW42	Zinc transporter ZIP13 (Solute carrier family 39 member 13) (Zrt- and Irt-like protein 13) (ZIP-13)	Slc39a13	Zip13
TRINITY_DN18630_c0_g1	0	0	0	0	0	P30874	Somatostatin receptor type 2 (SS-2-R) (SS2-R) (SS2R) (SRIF-1)	Sstr2	Smstr2	Sst2
TRINITY_DN186598_c0_g1	0	0	0	0	0	Q9QYZ3	Sperm motility kinase 2B (EC 2.7.11.1)	Smok2b	Gm1847
TRINITY_DN1866_c0_g1	0	0	0	0	0	Q8BFR4	N-acetylglucosamine-6-sulfatase (EC 3.1.6.14) (Glucosamine-6-sulfatase) (G6S)	Gns
TRINITY_DN18677_c0_g1	0	0	0	0	0	G5ECS8	Thrombospondin type-1 domain-containing protein 7A [Cleaved into: Thrombospondin type-1 domain-containing protein 7A, soluble form]	Thsd7a	Gm837	Kiaa0960
TRINITY_DN18684_c0_g1	0	0	0	0	0	Q17QQ2	Thiopurine S-methyltransferase (EC 2.1.1.67) (Thiopurine methyltransferase)	Tpmt
TRINITY_DN18694_c0_g1	0	0	0	0	0	Q90660	#N/A	#N/A
TRINITY_DN18694_c0_g2	0	0	0	0	0	Q90660	Baculoviral IAP repeat-containing protein 2 (EC 2.3.2.27) (Cellular inhibitor of apoptosis 1) (C-IAP1) (Inhibitor of apoptosis protein 2) (mIAP2) (RING-type E3 ubiquitin transferase BIRC2)	Birc2
TRINITY_DN1870_c0_g1	0	0	0	0	0	E9Q3S4	Mitogen-activated protein kinase kinase kinase 19 (EC 2.7.11.1) (SPS1/STE20-related protein kinase YSK4)	Map3k19	Ysk4
TRINITY_DN18706_c0_g1	0	0	0	0	0	Q6ZPT1	Kelch-like protein 9	Klhl9	Kiaa1354
TRINITY_DN1871_c0_g1	0	0	0	0	0	Q6P7N4	Abasic site processing protein HMCES (Embryonic stem cell-specific 5-hydroxymethylcytosine-binding protein) (ES cell-specific 5hmC-binding protein) (Peptidase HMCES) (EC 3.4.-.-) (SRAP domain-containing protein 1)	Hmces	Srap1	Srapd1
TRINITY_DN1872_c0_g1	0	0	0	0	0	Q5ZMD2	Ankyrin repeat and MYND domain-containing protein 2	Ankmy2
TRINITY_DN18720_c0_g1	0	0	0	0	0	Q8CGF6	WD repeat-containing protein 47 (Neuronal enriched MAP interacting protein) (Nemitin)	Wdr47	Kiaa0893
TRINITY_DN18733_c1_g1	0	0	0	0	0	P08548	LINE-1 retrotransposable element ORF2 protein (ORF2p) (Long interspersed element-1) (L1) (Retrovirus-related Pol polyprotein LINE-1) [Includes: Reverse transcriptase (EC 2.7.7.49); Endonuclease (EC 3.1.21.-)]	Pol	Gm17492
TRINITY_DN18738_c0_g1	0	0	0	0	0	Q8K430	Kelch-like protein 17 (Actinfilin)	Klhl17
TRINITY_DN18738_c0_g2	0	0	0	0	0	Q5U374	Kelch-like protein 12 (CUL3-interacting protein 1)	Klhl12	C3ip1
TRINITY_DN18746_c0_g2	0	0	0	0	0	P13360	#N/A	#N/A
TRINITY_DN18752_c0_g1	0	0	0	0	0	Q58A42	#N/A	#N/A
TRINITY_DN18764_c0_g2	0	0	0	0	0	Q96DM1	#N/A	#N/A
TRINITY_DN18771_c1_g1	0	0	0	0	0	O80673	Serine/threonine-protein kinase Nek1 (EC 2.7.11.1) (Never in mitosis A-related kinase 1) (NimA-related protein kinase 1)	Nek1
TRINITY_DN18785_c0_g1	0	0	0	0	0	Q91XQ0	Dynein heavy chain 8, axonemal (Axonemal beta dynein heavy chain 8) (Ciliary dynein heavy chain 8)	Dnah8	Dnahc8
TRINITY_DN18821_c0_g1	0	0	0	0	0	P08770	#N/A	#N/A
TRINITY_DN1884_c0_g1	0	0	0	0	0	Q91YE3	Egl nine homolog 1 (EC 1.14.11.29) (Hypoxia-inducible factor prolyl hydroxylase 2) (HIF-PH2) (HIF-prolyl hydroxylase 2) (HPH-2) (Prolyl hydroxylase domain-containing protein 2) (PHD2) (SM-20)	Egln1
TRINITY_DN18845_c0_g1	0	0	0	0	0	Q9D6L8	Peptidyl-prolyl cis-trans isomerase-like 3 (PPIase) (EC 5.2.1.8) (CYP10L) (Cyclophilin-like protein PPIL3) (Rotamase PPIL3)	Ppil3	Cyp10l
TRINITY_DN18848_c0_g1	0	0	0	0	0	E9PY46	#N/A	#N/A
TRINITY_DN1887_c0_g1	0	0	0	0	0	Q96FV9	THO complex subunit 1 (Tho1) (Nuclear matrix protein p84)	Thoc1	Hpr1
TRINITY_DN1888_c0_g1	0	0	0	0	0	Q5R454	ADP-ribosylation factor-like protein 6-interacting protein 1 (ARL-6-interacting protein 1) (Aip-1) (Protein TBX2)	Arl6ip1	Arl6ip
TRINITY_DN18881_c0_g1	0	0	0	0	0	Q07969	Platelet glycoprotein 4 (Glycoprotein IIIb) (GPIIIB) (PAS IV) (PAS-4) (Platelet glycoprotein IV) (GPIV) (CD antigen CD36)	Cd36
TRINITY_DN1890_c0_g1	0	0	0	0	0	P20929	#N/A	#N/A
TRINITY_DN18931_c0_g1	0	0	0	0	0	A1A5H8	Tyrosine-protein kinase Fgr (EC 2.7.10.2) (Proto-oncogene c-Fgr) (p55-Fgr)	Fgr
TRINITY_DN18945_c0_g1	0	0	0	0	0	Q9QX15	Calcium-activated chloride channel regulator 3A-1 (EC 3.4.-.-)	Clca3a1	Clca1
TRINITY_DN1897_c0_g1	0	0	0	0	0	Q99N46	#N/A	#N/A
TRINITY_DN18972_c0_g1	0	0	0	0	0	Q7RTX9	Monocarboxylate transporter 14 (MCT 14) (Solute carrier family 16 member 14)	Slc16a14	Mct14
TRINITY_DN18979_c0_g1	0	0	0	0	0	Q53G59	Kelch-like protein 12 (CUL3-interacting protein 1)	Klhl12	C3ip1
TRINITY_DN18986_c0_g1	0	0	0	0	0	Q966L8	Myoneurin	Mynn
TRINITY_DN190_c0_g1	0	0	0	0	0	P13585	Sarcoplasmic/endoplasmic reticulum calcium ATPase 2 (SERCA2) (SR Ca(2+)-ATPase 2) (EC 7.2.2.10) (Calcium pump 2) (Calcium-transporting ATPase sarcoplasmic reticulum type, slow twitch skeletal muscle isoform) (Endoplasmic reticulum class 1/2 Ca(2+) ATPase)	Atp2a2
TRINITY_DN1901_c0_g1	0	0	0	0	0	Q9H0C8	Integrin-linked kinase-associated serine/threonine phosphatase 2C (ILKAP) (EC 3.1.3.16)	Ilkap
TRINITY_DN19011_c0_g1	0	0	0	0	0	Q4V909	Coiled-coil domain-containing protein 22	Ccdc22	DXImx40e
TRINITY_DN19024_c0_g1	0	0	0	0	0	Q8CAS9	Protein mono-ADP-ribosyltransferase PARP9 (EC 2.4.2.-) (ADP-ribosyltransferase diphtheria toxin-like 9) (ARTD9) (B aggressive lymphoma protein homolog) (Poly [ADP-ribose] polymerase 9) (PARP-9)	Parp9	Bal
TRINITY_DN19036_c0_g1	0	0	0	0	0	A0A0R4I9Y1	E3 ubiquitin-protein ligase RNF213 (EC 2.3.2.27) (EC 3.6.4.-) (Mysterin) (RING finger protein 213) (RING-type E3 ubiquitin transferase RNF213)	Rnf213	Mystr
TRINITY_DN1906_c0_g1	0	0	0	0	0	O08915	AH receptor-interacting protein (AIP) (Aryl-hydrocarbon receptor-interacting protein)	Aip
TRINITY_DN1907_c0_g1	0	0	0	0	0	Q9DBD2	E3 ubiquitin-protein ligase MARCHF8 (EC 2.3.2.27) (Cellular modulator of immune recognition) (c-MIR) (Membrane-associated RING finger protein 8) (Membrane-associated RING-CH protein VIII) (MARCH-VIII) (RING-type E3 ubiquitin transferase MARCHF8)	Marchf8	2008-03-01	Mir
TRINITY_DN1912_c0_g1	0	0	0	0	0	Q9NR12	PDZ and LIM domain protein 7 (LIM mineralization protein) (LMP) (Protein enigma)	Pdlim7	Enigma
TRINITY_DN19122_c0_g1	0	0	0	0	0	Q803R5	Cap-specific mRNA (nucleoside-2'-O-)-methyltransferase 1 (EC 2.1.1.57) (Cap methyltransferase 1) (Cap1 2'O-ribose methyltransferase 1) (MTr1) (FtsJ methyltransferase domain-containing protein 2)	Cmtr1	Ftsjd2	Kiaa0082
TRINITY_DN191365_c0_g1	0	0	0	0	0	P29594	Caspase-2 (CASP-2) (EC 3.4.22.55) (Neural precursor cell expressed developmentally down-regulated protein 2) (NEDD-2) (Protease ICH-1) [Cleaved into: Caspase-2 subunit p18; Caspase-2 subunit p13; Caspase-2 subunit p12]	Casp2	Ich1	Nedd-2	Nedd2
TRINITY_DN19140_c0_g1	0	0	0	0	0	Q61830	Macrophage mannose receptor 1 (MMR) (CD antigen CD206)	Mrc1
TRINITY_DN1915_c0_g1	0	0	0	0	0	Q80V03	Uncharacterized aarF domain-containing protein kinase 5 (EC 2.7.11.-)	Adck5
TRINITY_DN19166_c0_g1	0	0	0	0	0	P05123	Creatine kinase M-type (EC 2.7.3.2) (Creatine kinase M chain) (Creatine phosphokinase M-type) (CPK-M) (M-CK)	Ckm	Ckmm
TRINITY_DN1917_c1_g2	0	0	0	0	0	Q6TDP4	Kelch-like protein 18	Klhl18
TRINITY_DN19176_c0_g2	0	0	0	0	0	Q3V080	Zinc finger protein 583	Znf583	Zfp583
TRINITY_DN192_c0_g1	0	0	0	0	0	P21333	Filamin-A (FLN-A) (Actin-binding protein 280) (ABP-280) (Alpha-filamin) (Endothelial actin-binding protein) (Filamin-1) (Non-muscle filamin)	Flna	Fln	Fln1
TRINITY_DN1921_c0_g1	0	0	0	0	0	Q0P436	Transmembrane protein 14C	Tmem14c
TRINITY_DN19212_c0_g1	0	0	0	0	0	Q5U3G1	Pulmonary surfactant-associated protein D (PSP-D) (SP-D) (Lung surfactant protein D)	Sftpd	Sftp4
TRINITY_DN19247_c0_g1	0	0	0	0	0	Q4KL91	Proton-coupled amino acid transporter 4 (Proton/amino acid transporter 4) (Solute carrier family 36 member 4)	Slc36a4	Pat4
TRINITY_DN19262_c0_g1	0	0	0	0	0	O02751	#N/A	#N/A
TRINITY_DN19269_c0_g1	0	0	0	0	0	Q5R5X0	#N/A	#N/A
TRINITY_DN19276_c0_g1	0	0	0	0	0	Q8BGV5	Zinc finger protein 8 (Zinc finger protein 128)	Znf8	Zfp128
TRINITY_DN193_c0_g1	0	0	0	0	0	Q6DFA6	Golgin subfamily A member 7	Golga7	MNCb-1213
TRINITY_DN19317_c0_g1	0	0	0	0	0	Q9W0Y2	Gamma-glutamylaminecyclotransferase (GGACT) (EC 4.3.2.8) (AIG2-like domain-containing protein 1) (Gamma-glutamylamine cyclotransferase)	Ggact	A2ld1
TRINITY_DN19318_c0_g1	0	0	0	0	0	Q8I7P9	Jerky protein homolog-like	Jrkl
TRINITY_DN19327_c0_g2	0	0	0	0	0	Q556Q3	#N/A	#N/A
TRINITY_DN19331_c0_g1	0	0	0	0	0	Q6YHK3	CD109 antigen (GPI-anchored alpha-2 macroglobulin-related protein) (CD antigen CD109)	Cd109
TRINITY_DN19338_c0_g1	0	0	0	0	0	Q96EY1	DnaJ homolog subfamily A member 3, mitochondrial (DnaJ protein Tid-1) (mTid-1) (Tumorous imaginal discs protein Tid56 homolog)	Dnaja3	Tid1
TRINITY_DN19339_c0_g1	0	0	0	0	0	Q8N539	Fibrinogen C domain-containing protein 1	Fibcd1
TRINITY_DN1935_c0_g1	0	0	0	0	0	Q91VX2	Ubiquitin-associated protein 2 (UBAP-2) (Protein lingerer homolog 1) (mLig-1)	Ubap2	Lig1
TRINITY_DN19352_c0_g2	0	0	0	0	0	A0AUV4	Sperm motility kinase Y (EC 2.7.11.1)	Gm7168
TRINITY_DN1938_c0_g2	0	0	0	0	0	Q9NBX4	LINE-1 retrotransposable element ORF2 protein (ORF2p) (Long interspersed element-1) (L1) (Retrovirus-related Pol polyprotein LINE-1) [Includes: Reverse transcriptase (EC 2.7.7.49); Endonuclease (EC 3.1.21.-)]	Pol	Gm17492
TRINITY_DN1938_c1_g1	0	0	0	0	0	Q17QQ2	Thiopurine S-methyltransferase (EC 2.1.1.67) (Thiopurine methyltransferase)	Tpmt
TRINITY_DN19404_c0_g1	0	0	0	0	0	P22031	#N/A	#N/A
TRINITY_DN19408_c0_g1	0	0	0	0	0	Q0ZHH6	Atlastin-3 (EC 3.6.5.-)	Atl3
TRINITY_DN19409_c0_g2	0	0	0	0	0	P15094	#N/A	#N/A
TRINITY_DN1941_c0_g1	0	0	0	0	0	Q26534	Cathepsin F (EC 3.4.22.41)	Ctsf
TRINITY_DN1941_c0_g2	0	0	0	0	0	Q9R013	#N/A	#N/A
TRINITY_DN19419_c0_g1	0	0	0	0	0	Q68EL3	BET1-like protein (Golgi SNARE with a size of 15 kDa) (GOS-15) (GS15) (Vesicle transport protein GOS15)	Bet1l	Gs15
TRINITY_DN19424_c0_g4	0	0	0	0	0	P63018	Heat shock cognate 71 kDa protein (Heat shock 70 kDa protein 8)	Hspa8	Hsc70	Hsc73
TRINITY_DN19428_c0_g1	0	0	0	0	0	O00602	Fibrinogen C domain-containing protein 1	Fibcd1
TRINITY_DN19429_c2_g1	0	0	0	0	0	P16924	Prolyl 4-hydroxylase subunit alpha-2 (4-PH alpha-2) (EC 1.14.11.2) (Procollagen-proline,2-oxoglutarate-4-dioxygenase subunit alpha-2)	P4ha2
TRINITY_DN19440_c0_g1	0	0	0	0	0	Q9PSX7	Transforming protein RhoA (EC 3.6.5.2)	Rhoa	Arha	Arha2
TRINITY_DN19450_c0_g1	0	0	0	0	0	P98088	#N/A	#N/A
TRINITY_DN1946_c0_g1	0	0	0	0	0	P35479	#N/A	#N/A
TRINITY_DN19487_c1_g1	0	0	0	0	0	Q95SX7	#N/A	#N/A
TRINITY_DN195_c0_g1	0	0	0	0	0	Q15393	Splicing factor 3B subunit 3 (Pre-mRNA-splicing factor SF3b 130 kDa subunit) (SF3b130) (Spliceosome-associated protein 130) (SAP 130)	Sf3b3	Kiaa0017
TRINITY_DN19518_c0_g2	0	0	0	0	0	Q96Q07	BTB/POZ domain-containing protein 9	Btbd9
TRINITY_DN19518_c0_g3	0	0	0	0	0	Q96Q07	BTB/POZ domain-containing protein 9	Btbd9
TRINITY_DN1953_c0_g1	0	0	0	0	0	Q68FT3	Pyridine nucleotide-disulfide oxidoreductase domain-containing protein 2 (EC 1.-.-.-)	Pyroxd2
TRINITY_DN195344_c0_g1	0	0	0	0	0	Q8WVQ1	Soluble calcium-activated nucleotidase 1 (SCAN-1) (EC 3.6.1.6) (Apyrase homolog)	Cant1
TRINITY_DN19535_c0_g1	0	0	0	0	0	Q64464	Cytochrome P450 3A13 (EC 1.14.14.1) (CYPIIIA13)	Cyp3a13	Cyp3a-13
TRINITY_DN19535_c0_g2	0	0	0	0	0	Q64459	Cytochrome P450 3A11 (EC 1.14.14.1) (CYPIIIA11) (Cytochrome P-450IIIAM1) (Cytochrome P-450UT)	Cyp3a11	Cyp3a-11
TRINITY_DN19539_c0_g1	0	0	0	0	0	A0A0R4I9Y1	#N/A	#N/A
TRINITY_DN19564_c0_g1	0	0	0	0	0	Q53B87	#N/A	#N/A
TRINITY_DN1957_c0_g1	0	0	0	0	0	Q28CH8	Protein YIPF6 (YIP1 family member 6)	Yipf6
TRINITY_DN19570_c0_g1	0	0	0	0	0	Q6AYG3	Exopolyphosphatase PRUNE1 (EC 3.6.1.1) (PRUNEM1)	Prune1	Prune
TRINITY_DN19577_c0_g1	0	0	0	0	0	P36364	Fibroblast growth factor 9 (FGF-9) (Glia-activating factor) (GAF) (HBGF-9)	Fgf9	Fgf-9
TRINITY_DN1958_c0_g1	0	0	0	0	0	Q6P444	Mitochondrial fission regulator 2 (DUF729 domain-containing protein 1)	Mtfr2	Dufd1	Fam54a
TRINITY_DN19582_c0_g1	0	0	0	0	0	Q61H86	#N/A	#N/A
TRINITY_DN19582_c0_g2	0	0	0	0	0	Q93127	Growth hormone secretagogue receptor type 1 (GHS-R) (GH-releasing peptide receptor) (GHRP) (Ghrelin receptor)	Ghsr
TRINITY_DN1968_c0_g1	0	0	0	0	0	Q8N2S1	Latent-transforming growth factor beta-binding protein 4 (LTBP-4)	Ltbp4
TRINITY_DN19696_c0_g1	0	0	0	0	0	P61023	Calcineurin B homologous protein 1 (Calcineurin B-like protein) (Calcium-binding protein CHP) (Calcium-binding protein p22) (EF-hand calcium-binding domain-containing protein p22) (Sid 470) (p24)	Chp1	Chp	Sid470
TRINITY_DN197_c0_g1	0	0	0	0	0	Q641G3	Cell division cycle and apoptosis regulator protein 1 (Cell cycle and apoptosis regulatory protein 1) (CARP-1)	Ccar1	Carp1
TRINITY_DN1971_c0_g1	0	0	0	0	0	Q8WWQ8	Stabilin-2 (Fasciclin, EGF-like, laminin-type EGF-like and link domain-containing scavenger receptor 2) (FEEL-2) [Cleaved into: Short form stabilin-2]	Stab2	Feel2	Hare
TRINITY_DN19715_c0_g1	0	0	0	0	0	Q460N5	Protein mono-ADP-ribosyltransferase PARP14 (EC 2.4.2.-) (ADP-ribosyltransferase diphtheria toxin-like 8) (ARTD8) (Collaborator of STAT6) (CoaSt6) (Poly [ADP-ribose] polymerase 14) (PARP-14)	Parp14	Kiaa1268
TRINITY_DN19720_c0_g2	0	0	0	0	0	Q6PA06	#N/A	#N/A
TRINITY_DN19728_c0_g1	0	0	0	0	0	Q80TC5	#N/A	#N/A
TRINITY_DN1974_c0_g2	0	0	0	0	0	Q8IUL8	Cartilage intermediate layer protein 2 [Cleaved into: Cartilage intermediate layer protein 2 C1; Cartilage intermediate layer protein 2 C2]	Cilp2
TRINITY_DN19755_c0_g1	0	0	0	0	0	Q15696	U2 small nuclear ribonucleoprotein auxiliary factor 35 kDa subunit-related protein 1 (CCCH type zinc finger, RNA-binding motif and serine/arginine rich protein 1) (SP2) (U2(RNU2) small nuclear RNA auxiliary factor 1-like 1)	Zrsr1	Sp2	Sp2-7	U2af1-rs1	U2af1l1
TRINITY_DN1976_c0_g1	0	0	0	0	0	Q566Y1	Elongator complex protein 4 (PAX6 neighbor gene protein)	Elp4	Paxneb
TRINITY_DN19769_c0_g1	0	0	0	0	0	O00602	Ficolin-2 (Collagen/fibrinogen domain-containing protein 2) (Ficolin-B) (Ficolin-beta) (L-ficolin)	Fcn2	Fcnb
TRINITY_DN19775_c0_g1	0	0	0	0	0	Q14831	Metabotropic glutamate receptor 4 (mGluR4)	Grm4	Gprc1d	Mglur4
TRINITY_DN19793_c0_g1	0	0	0	0	0	Q60928	Glutathione hydrolase 1 proenzyme (EC 3.4.19.13) (Gamma-glutamyltransferase 1) (Gamma-glutamyltranspeptidase 1) (GGT 1) (EC 2.3.2.2) (Leukotriene-C4 hydrolase) (EC 3.4.19.14) (CD antigen CD224) [Cleaved into: Glutathione hydrolase 1 heavy chain; Glutathione hydrolase 1 light chain]	Ggt1	Ggt	Ggtp
TRINITY_DN1980_c0_g1	0	0	0	0	0	O09101	Phosphatidylinositol-glycan biosynthesis class F protein (PIG-F)	Pigf
TRINITY_DN19815_c0_g1	0	0	0	0	0	Q95SX7	#N/A	#N/A
TRINITY_DN19831_c0_g1	0	0	0	0	0	Q6P3R8	Serine/threonine-protein kinase Nek1 (EC 2.7.11.1) (Never in mitosis A-related kinase 1) (NimA-related protein kinase 1)	Nek1
TRINITY_DN1984_c0_g1	0	0	0	0	0	Q9JJC6	RILP-like protein 1 (Rab-interacting lysosomal-like protein 1)	Rilpl1	MNCb-2440
TRINITY_DN19846_c0_g2	0	0	0	0	0	A6NI61	Protein myomaker (Myoblast fusion maker) (Transmembrane protein 8C)	Mymk	Tmem8c
TRINITY_DN19873_c1_g1	0	0	0	0	0	A6NK53	Zinc finger protein 583	Znf583	Zfp583
TRINITY_DN1990_c0_g1	0	0	0	0	0	Q5EA43	Sideroflexin-2	Sfxn2
TRINITY_DN19904_c0_g1	0	0	0	0	0	Q924Z4	Ceramide synthase 2 (CerS2) (EC 2.3.1.-) (LAG1 longevity assurance homolog 2) (Sphingosine N-acyltransferase CERS2) (EC 2.3.1.24) (Translocating chain-associating membrane protein homolog 3) (TRAM homolog 3)	Cers2	Lass2	Trh3
TRINITY_DN19906_c0_g1	0	0	0	0	0	Q80U62	Run domain Beclin-1-interacting and cysteine-rich domain-containing protein (Rubicon)	Rubcn	Kiaa0226
TRINITY_DN1995_c1_g1	0	0	0	0	0	P30151	Elongation factor 1-beta (EF-1-beta)	Eef1b	Eef1b2
TRINITY_DN19959_c0_g1	0	0	0	0	0	Q8BUL5	Kelch-like protein 7	Klhl7
TRINITY_DN1998_c0_g1	0	0	0	0	0	P48739	Phosphatidylinositol transfer protein beta isoform (PI-TP-beta) (PtdIns transfer protein beta) (PtdInsTP beta)	Pitpnb
TRINITY_DN1999_c0_g1	0	0	0	0	0	Q32NW2	Leukocyte receptor cluster member 8 homolog	Leng8
TRINITY_DN19992_c0_g1	0	0	0	0	0	Q5PQ71	Isochorismatase domain-containing protein 2A	Isoc2a	Isoc2
TRINITY_DN20023_c0_g2	0	0	0	0	0	Q61624	Zinc finger protein 148 (Beta enolase repressor factor 1) (G-rich box-binding protein) (Transcription factor BFCOL1) (Transcription factor ZBP-89) (Zinc finger DNA-binding protein 89)	Znf148	Zbp89	Zfp148
TRINITY_DN2003_c0_g1	0	0	0	0	0	Q5TZ51	Protein Mpv17 (Mpv-17)	Mpv17
TRINITY_DN20049_c3_g1	0	0	0	0	0	P21328	#N/A	#N/A
TRINITY_DN20054_c0_g1	0	0	0	0	0	E1B932	Kelch-like protein 12 (CUL3-interacting protein 1)	Klhl12	C3ip1
TRINITY_DN20054_c1_g1	0	0	0	0	0	Q5U374	Kelch-like protein 12 (CUL3-interacting protein 1)	Klhl12	C3ip1
TRINITY_DN20073_c0_g1	0	0	0	0	0	Q5U374	Kelch-like protein 12 (CUL3-interacting protein 1)	Klhl12	C3ip1
TRINITY_DN20110_c0_g1	0	0	0	0	0	Q9MYM7	#N/A	#N/A
TRINITY_DN20113_c0_g1	0	0	0	0	0	Q8VCK5	Kelch-like protein 20 (Kelch-like ECT2-interacting protein)	Klhl20	Kiaa4210	Kleip
TRINITY_DN20134_c0_g1	0	0	0	0	0	Q63HN8	E3 ubiquitin-protein ligase RNF213 (EC 2.3.2.27) (EC 3.6.4.-) (Mysterin) (RING finger protein 213) (RING-type E3 ubiquitin transferase RNF213)	Rnf213	Mystr
TRINITY_DN20158_c0_g1	0	0	0	0	0	A0A0R4IBK5	E3 ubiquitin-protein ligase RNF213 (EC 2.3.2.27) (EC 3.6.4.-) (Mysterin) (RING finger protein 213) (RING-type E3 ubiquitin transferase RNF213)	Rnf213	Mystr
TRINITY_DN20167_c0_g1	0	0	0	0	0	Q10583	Hemicentin-2	Hmcn2
TRINITY_DN20233_c1_g1	0	0	0	0	0	Q1LYM6	Kelch-like protein 10	Klhl10
TRINITY_DN20236_c0_g1	0	0	0	0	0	P33124	Long-chain-fatty-acid--CoA ligase 6 (EC 6.2.1.3) (Arachidonate--CoA ligase) (EC 6.2.1.15) (Long-chain acyl-CoA synthetase 6) (LACS 6)	Acsl6	Facl6
TRINITY_DN20238_c0_g1	0	0	0	0	0	Q5R6Q2	Syntaxin-6	Stx6
TRINITY_DN2024_c0_g2	0	0	0	0	0	C6FG12	#N/A	#N/A
TRINITY_DN20249_c0_g1	0	0	0	0	0	P27044	Guanine nucleotide-binding protein G(i) subunit alpha-1 (Adenylate cyclase-inhibiting G alpha protein)	Gnai1	Gnai-1
TRINITY_DN2026_c0_g1	0	0	0	0	0	Q4KL91	Proton-coupled amino acid transporter 4 (Proton/amino acid transporter 4) (Solute carrier family 36 member 4)	Slc36a4	Pat4
TRINITY_DN20264_c0_g1	0	0	0	0	0	Q98943	Caspase-2 (CASP-2) (EC 3.4.22.55) (Neural precursor cell expressed developmentally down-regulated protein 2) (NEDD-2) (Protease ICH-1) [Cleaved into: Caspase-2 subunit p18; Caspase-2 subunit p13; Caspase-2 subunit p12]	Casp2	Ich1	Nedd-2	Nedd2
TRINITY_DN20266_c0_g1	0	0	0	0	0	Q86UP8	General transcription factor II-I repeat domain-containing protein 2 (GTF2I repeat domain-containing protein 2) (Transcription factor GTF2IRD2)	Gtf2ird2
TRINITY_DN20270_c0_g1	0	0	0	0	0	Q8I7P9	Protein NYNRIN (NYN domain and retroviral integrase catalytic domain-containing protein) (Pol-like protein)	Nynrin	Kiaa1305
TRINITY_DN20272_c0_g1	0	0	0	0	0	Q9H361	Polyadenylate-binding protein 1 (PABP-1) (Poly(A)-binding protein 1)	Pabpc1	Pabp1
TRINITY_DN20276_c0_g1	0	0	0	0	0	P53356	Tyrosine-protein kinase ZAP-70 (EC 2.7.10.2) (70 kDa zeta-chain associated protein) (Syk-related tyrosine kinase)	Zap70	Srk	Zap-70
TRINITY_DN2030_c0_g1	0	0	0	0	0	P21956	Lactadherin (MFGM) (Milk fat globule-EGF factor 8) (MFG-E8) (SED1) (Sperm surface protein SP47) (MP47)	Mfge8
TRINITY_DN20311_c0_g1	0	0	0	0	0	Q53FV1	ORM1-like protein 3	Ormdl3
TRINITY_DN20334_c0_g1	0	0	0	0	0	Q6ZHE5	#N/A	#N/A
TRINITY_DN20352_c0_g1	0	0	0	0	0	P34456	#N/A	#N/A
TRINITY_DN2040_c0_g2	0	0	0	0	0	Q5FWM4	Serine/threonine-protein phosphatase PGAM5, mitochondrial (EC 3.1.3.16) (Phosphoglycerate mutase family member 5)	Pgam5
TRINITY_DN20405_c0_g1	0	0	0	0	0	A5D7E2	Transmembrane 9 superfamily member 4	Tm9sf4	Kiaa0255
TRINITY_DN20426_c0_g1	0	0	0	0	0	Q4V8D6	#N/A	#N/A
TRINITY_DN20429_c0_g1	0	0	0	0	0	Q3UIR3	E3 ubiquitin-protein ligase DTX3L (EC 2.3.2.27) (Protein deltex-3-like) (RING-type E3 ubiquitin transferase DTX3L)	Dtx3l	Bbap
TRINITY_DN20429_c1_g1	0	0	0	0	0	Q3UIR3	E3 ubiquitin-protein ligase DTX3L (EC 2.3.2.27) (Protein deltex-3-like) (RING-type E3 ubiquitin transferase DTX3L)	Dtx3l	Bbap
TRINITY_DN2044_c0_g1	0	0	0	0	0	P18433	Receptor-type tyrosine-protein phosphatase alpha (Protein-tyrosine phosphatase alpha) (R-PTP-alpha) (EC 3.1.3.48) (LCA-related phosphatase) (PTPTY-28)	Ptpra	Lrp	Ptpa
TRINITY_DN20469_c0_g1	0	0	0	0	0	Q95YM9	Hemicentin-1 (Fibulin-6) (FIBL-6)	Hmcn1
TRINITY_DN20488_c1_g1	0	0	0	0	0	Q60847	Collagen alpha-1(XII) chain	Col12a1
TRINITY_DN2050_c0_g1	0	0	0	0	0	Q9NUN7	Alkaline ceramidase 3 (AlkCDase 3) (Alkaline CDase 3) (EC 3.5.1.-) (EC 3.5.1.23) (Alkaline phytoceramidase) (aPHC)	Acer3	Aphc	Phca
TRINITY_DN2052_c0_g1	0	0	0	0	0	Q5R5X8	Adenylyl cyclase-associated protein 2 (CAP 2)	Cap2
TRINITY_DN20525_c0_g1	0	0	0	0	0	Q99816	Tumor susceptibility gene 101 protein (ESCRT-I complex subunit TSG101)	Tsg101
TRINITY_DN20536_c0_g1	0	0	0	0	0	A6NK53	Zinc finger protein 2 (Zfp-2) (Protein mKR2)	Zfp2	Fnp-2	Mkr2	Zfp-2
TRINITY_DN20537_c0_g1	0	0	0	0	0	Q09PK2	#N/A	#N/A
TRINITY_DN2054_c0_g1	0	0	0	0	0	Q96B97	CD2-associated protein (Mesenchyme-to-epithelium transition protein with SH3 domains 1) (METS-1)	Cd2ap	Mets1
TRINITY_DN20582_c0_g1	0	0	0	0	0	Q5ZL74	Vesicle-associated membrane protein 7 (VAMP-7) (Synaptobrevin-like protein 1)	Vamp7	Sybl1
TRINITY_DN20628_c0_g1	0	0	0	0	0	P22105	Tenascin (TN) (Hexabrachion) (Tenascin-C) (TN-C)	Tnc	Hxb
TRINITY_DN2063_c0_g1	0	0	0	0	0	P47736	Rap1 GTPase-activating protein 1 (Rap1GAP) (Rap1GAP1) (ARPP-90)	Rap1gap	Kiaa0474	Rap1ga1
TRINITY_DN20630_c0_g1	0	0	0	0	0	Q53G59	Kelch-like protein 12 (CUL3-interacting protein 1)	Klhl12	C3ip1
TRINITY_DN20635_c0_g1	0	0	0	0	0	Q6PST4	Atlastin-1 (EC 3.6.5.-) (Spastic paraplegia 3A homolog)	Atl1	Spg3a
TRINITY_DN20650_c1_g2	0	0	0	0	0	Q1EHB4	Sodium-coupled monocarboxylate transporter 2 (Electroneutral sodium monocarboxylate cotransporter) (Low-affinity sodium-lactate cotransporter) (Solute carrier family 5 member 12)	Slc5a12	Smct2
TRINITY_DN20658_c0_g1	0	0	0	0	0	A7T167	Ganglioside-induced differentiation-associated protein 2	Gdap2
TRINITY_DN20661_c0_g1	0	0	0	0	0	Q08DY9	Caspase-7 (CASP-7) (EC 3.4.22.60) (Apoptotic protease Mch-3) (Cysteine protease LICE2) [Cleaved into: Caspase-7 subunit p20; Caspase-7 subunit p11]	Casp7	Lice2	Mch3
TRINITY_DN20667_c0_g1	0	0	0	0	0	Q60HD2	Atlastin-1 (EC 3.6.5.-) (Spastic paraplegia 3A homolog)	Atl1	Spg3a
TRINITY_DN20673_c0_g1	0	0	0	0	0	F1MBP6	Kelch-like protein 2	Klhl2
TRINITY_DN20684_c0_g1	0	0	0	0	0	Q4V8B8	tRNA wybutosine-synthesizing protein 2 homolog (tRNA-yW-synthesizing protein 2) (EC 2.5.1.114) (tRNA(Phe) (4-demethylwyosine(37)-C(7)) aminocarboxypropyltransferase)	Trmt12	Tyw2
TRINITY_DN20686_c0_g1	0	0	0	0	0	Q556Q3	#N/A	#N/A
TRINITY_DN2070_c0_g1	0	0	0	0	0	Q5RET6	Transmembrane protein 184C (Transmembrane protein 34)	Tmem184c	Tmem34
TRINITY_DN20727_c0_g1	0	0	0	0	0	Q70CQ4	Ubiquitin carboxyl-terminal hydrolase 43 (EC 3.4.19.12) (Deubiquitinating enzyme 43) (Ubiquitin thioesterase 43) (Ubiquitin-specific-processing protease 43)	Usp43
TRINITY_DN20743_c0_g1	0	0	0	0	0	A7YY28	Protein ABHD14B (EC 3.-.-.-) (Alpha/beta hydrolase domain-containing protein 14B) (Abhydrolase domain-containing protein 14B) (CCG1-interacting factor B)	Abhd14b	Cib
TRINITY_DN2076_c0_g1	0	0	0	0	0	Q6DDL7	Protein unc-93 homolog A (Unc-93A)	Unc93a
TRINITY_DN2076_c0_g2	0	0	0	0	0	Q86WB7	Protein unc-93 homolog A (Unc-93A)	Unc93a
TRINITY_DN20761_c0_g1	0	0	0	0	0	Q8CBH5	Major facilitator superfamily domain-containing protein 6 (Macrophage MHC class I receptor 2)	Mfsd6	Mmr2
TRINITY_DN20779_c0_g1	0	0	0	0	0	Q7ZX53	Solute carrier family 22 member 15	Slc22a15
TRINITY_DN2078_c0_g1	0	0	0	0	0	Q5W041	Armadillo repeat-containing protein 3	Armc3
TRINITY_DN20782_c0_g1	0	0	0	0	0	O43916	Carbohydrate sulfotransferase 1 (EC 2.8.2.21) (Galactose/N-acetylglucosamine/N-acetylglucosamine 6-O-sulfotransferase 1) (GST-1) (Keratan sulfate Gal-6 sulfotransferase) (KS6ST) (KSGal6ST) (KSST)	Chst1	Gst1
TRINITY_DN20783_c0_g1	0	0	0	0	0	Q9C5S2	Serine/threonine-protein kinase/endoribonuclease IRE1 (Endoplasmic reticulum-to-nucleus signaling 1) (Inositol-requiring protein 1) (Ire1-alpha) (IRE1a) [Includes: Serine/threonine-protein kinase (EC 2.7.11.1); Endoribonuclease (EC 3.1.26.-)]	Ern1	Ire1
TRINITY_DN20788_c0_g1	0	0	0	0	0	Q80ZA4	Fibrocystin-L (Polycystic kidney and hepatic disease 1-like protein 1) (PKHD1-like protein 1) (Protein D86)	Pkhd1l1
TRINITY_DN20793_c0_g1	0	0	0	0	0	O14775	Guanine nucleotide-binding protein subunit beta-5 (Gbeta5) (Transducin beta chain 5)	Gnb5
TRINITY_DN20794_c0_g1	0	0	0	0	0	Q8JZP3	#N/A	#N/A
TRINITY_DN20808_c0_g1	0	0	0	0	0	Q5PQX1	#N/A	#N/A
TRINITY_DN2082_c0_g1	0	0	0	0	0	P42232	Signal transducer and activator of transcription 5B	Stat5b
TRINITY_DN20821_c0_g1	0	0	0	0	0	Q8C120	E3 ubiquitin-protein ligase SH3RF3 (EC 2.3.2.27) (Plenty of SH3s 2) (SH3 domain-containing RING finger protein 3) (SH3 multiple domains protein 4)	Sh3rf3	Posh2	Sh3md4
TRINITY_DN20825_c0_g1	0	0	0	0	0	Q9C0G6	Dynein heavy chain 2, axonemal (Axonemal beta dynein heavy chain 2) (Ciliary dynein heavy chain 2)	Dnah2	Dnahc2
TRINITY_DN20832_c0_g1	0	0	0	0	0	P70490	Lactadherin (MFGM) (Milk fat globule-EGF factor 8) (MFG-E8) (SED1) (Sperm surface protein SP47) (MP47)	Mfge8
TRINITY_DN2084_c0_g1	0	0	0	0	0	Q9DE26	RuvB-like 1 (EC 3.6.4.12) (49 kDa TATA box-binding protein-interacting protein) (49 kDa TBP-interacting protein) (DNA helicase p50) (Pontin 52) (TIP49a)	Ruvbl1	Tip49	Tip49a
TRINITY_DN20857_c0_g1	0	0	0	0	0	P85838	Ferritin heavy chain (Ferritin H subunit) (EC 1.16.3.1) [Cleaved into: Ferritin heavy chain, N-terminally processed]	Fth1	Fth
TRINITY_DN20906_c0_g1	0	0	0	0	0	P03697	#N/A	#N/A
TRINITY_DN20913_c0_g1	0	0	0	0	0	P98094	Complement C4-B [Cleaved into: Complement C4 beta chain; Complement C4 alpha chain; C4a anaphylatoxin; Complement C4 gamma chain]	C4b	C4
TRINITY_DN20917_c0_g2	0	0	0	0	0	P28175	Vitrin (Akhirin)	Vit	Akh
TRINITY_DN20960_c0_g1	0	0	0	0	0	Q1ECZ2	#N/A	#N/A
TRINITY_DN20963_c0_g1	0	0	0	0	0	Q9UGP8	Translocation protein SEC63 homolog	Sec63	Sec63l
TRINITY_DN20981_c0_g2	0	0	0	0	0	Q6V595	#N/A	#N/A
TRINITY_DN2102_c0_g1	0	0	0	0	0	P21953	2-oxoisovalerate dehydrogenase subunit beta, mitochondrial (EC 1.2.4.4) (Branched-chain alpha-keto acid dehydrogenase E1 component beta chain) (BCKDE1B) (BCKDH E1-beta)	Bckdhb
TRINITY_DN21024_c0_g2	0	0	0	0	0	E9Q5R7	#N/A	#N/A
TRINITY_DN210255_c0_g1	0	0	0	0	0	Q99L04	Dehydrogenase/reductase SDR family member 1 (EC 1.1.-.-)	Dhrs1	D14ertd484e
TRINITY_DN2105_c0_g1	0	0	0	0	0	Q14184	Double C2-like domain-containing protein beta (Doc2-beta)	Doc2b
TRINITY_DN21060_c1_g1	0	0	0	0	0	Q460N5	#N/A	#N/A
TRINITY_DN21061_c0_g1	0	0	0	0	0	Q8R151	NFX1-type zinc finger-containing protein 1	Znfx1
TRINITY_DN210904_c0_g1	0	0	0	0	0	Q7Z407	CUB and sushi domain-containing protein 3 (CUB and sushi multiple domains protein 3)	Csmd3	Kiaa1894
TRINITY_DN21092_c0_g1	0	0	0	0	0	P20825	Retrotransposon-like protein 1 (Mammalian retrotransposon derived protein 1) (Paternally expressed gene 11 protein) (Retrotransposon-derived protein PEG11)	Rtl1	2001-03-01	Mart1	Peg11
TRINITY_DN2111_c0_g1	0	0	0	0	0	A4IHD9	Mediator of RNA polymerase II transcription subunit 25 (Mediator complex subunit 25) (mMED25)	Med25
TRINITY_DN21136_c0_g1	0	0	0	0	0	Q4LDE5	Sushi, von Willebrand factor type A, EGF and pentraxin domain-containing protein 1 (Polydom)	Svep1
TRINITY_DN21140_c0_g1	0	0	0	0	0	Q86WI1	Fibrocystin-L (Polycystic kidney and hepatic disease 1-like protein 1) (PKHD1-like protein 1) (Protein D86)	Pkhd1l1
TRINITY_DN21154_c0_g1	0	0	0	0	0	F1LZ52	Kelch-like protein 3	Klhl3
TRINITY_DN21199_c0_g1	0	0	0	0	0	P81732	#N/A	#N/A
TRINITY_DN212_c0_g1	0	0	0	0	0	Q8BLR2	Copine-4 (Copine IV)	Cpne4
TRINITY_DN212_c1_g1	0	0	0	0	0	Q9D187	Cytosolic iron-sulfur assembly component 2B (Mitotic spindle-associated MMXD complex subunit MIP18)	Ciao2b	Fam96b	Mip18
TRINITY_DN2120_c0_g1	0	0	0	0	0	P70500	CDP-diacylglycerol--inositol 3-phosphatidyltransferase (EC 2.7.8.11) (Phosphatidylinositol synthase) (PI synthase) (PtdIns synthase)	Cdipt	Pis1
TRINITY_DN21206_c0_g2	0	0	0	0	0	A1E2V0	Baculoviral IAP repeat-containing protein 3 (EC 2.3.2.27) (Cellular inhibitor of apoptosis 2) (C-IAP2) (Inhibitor of apoptosis protein 1) (mIAP1) (RING-type E3 ubiquitin transferase BIRC3)	Birc3
TRINITY_DN2121_c0_g1	0	0	0	0	0	Q7ZXS7	Gap junction gamma-1 protein (Connexin-45) (Cx45) (Gap junction alpha-7 protein)	Gjc1	Cxn-45	Gja7
TRINITY_DN21217_c0_g1	0	0	0	0	0	Q8C3I8	Protein HGH1 homolog	Hgh1	Brp16	Fam203a	MNCb-5873
TRINITY_DN21226_c0_g1	0	0	0	0	0	Q3BAI2	#N/A	#N/A
TRINITY_DN21261_c0_g1	0	0	0	0	0	Q9D9P2	Coiled-coil domain-containing protein 103	Ccdc103
TRINITY_DN212655_c0_g1	0	0	0	0	0	P24470	Cytochrome P450 2C54 (EC 1.14.14.1) (CYPIIC54)	Cyp2c54
TRINITY_DN2130_c0_g1	0	0	0	0	0	Q8BQN5	Protein FAM78B	Fam78b
TRINITY_DN2130_c0_g2	0	0	0	0	0	Q8BQN5	Protein FAM78B	Fam78b
TRINITY_DN21307_c0_g1	0	0	0	0	0	Q7Z2H8	#N/A	#N/A
TRINITY_DN21380_c0_g1	0	0	0	0	0	O15973	#N/A	#N/A
TRINITY_DN2139_c0_g2	0	0	0	0	0	Q96AQ1	#N/A	#N/A
TRINITY_DN21393_c0_g1	0	0	0	0	0	Q9M2U3	Putative nuclease HARBI1 (EC 3.1.-.-) (Harbinger transposase-derived nuclease)	Harbi1
TRINITY_DN2142_c0_g1	0	0	0	0	0	P0CB49	YLP motif-containing protein 1 (Nuclear protein ZAP3)	Ylpm1	Zap	Zap3
TRINITY_DN21461_c0_g1	0	0	0	0	0	Q13093	Platelet-activating factor acetylhydrolase 2, cytoplasmic (EC 3.1.1.47) (Serine-dependent phospholipase A2) (SD-PLA2)	Pafah2
TRINITY_DN21478_c0_g1	0	0	0	0	0	Q4W5Z4	DNA (cytosine-5)-methyltransferase 3A (Dnmt3a) (EC 2.1.1.37) (DNA methyltransferase MmuIIIA) (DNA MTase MmuIIIA) (M.MmuIIIA)	Dnmt3a
TRINITY_DN21504_c0_g1	0	0	0	0	0	O46503	Sulfotransferase 1C2 (ST1C2) (EC 2.8.2.-)	Sult1c2	Sult1c1
TRINITY_DN2152_c0_g1	0	0	0	0	0	Q5ZK63	Activated RNA polymerase II transcriptional coactivator p15 (Positive cofactor 4) (PC4) (SUB1 homolog) (Single-stranded DNA-binding protein p9) (p14)	Sub1	Pc4	Rpo2tc1
TRINITY_DN21529_c0_g2	0	0	0	0	0	Q5G872	#N/A	#N/A
TRINITY_DN2153_c0_g1	0	0	0	0	0	Q9CWH1	Zinc finger and BTB domain-containing protein 8A	Zbtb8a
TRINITY_DN21544_c0_g1	0	0	0	0	0	Q8TDB6	E3 ubiquitin-protein ligase DTX3L (EC 2.3.2.27) (Protein deltex-3-like) (RING-type E3 ubiquitin transferase DTX3L)	Dtx3l	Bbap
TRINITY_DN2156_c0_g1	0	0	0	0	0	P49760	Dual specificity protein kinase CLK2 (EC 2.7.12.1) (CDC-like kinase 2)	Clk2
TRINITY_DN21562_c0_g1	0	0	0	0	0	P61406	Telomerase-binding protein EST1A (EC 3.1.-.-) (EST1-like protein A) (Ever shorter telomeres 1A) (Smg-6 homolog) (Telomerase subunit EST1A)	Smg6	Est1a	Kiaa0732
TRINITY_DN2161_c0_g1	0	0	0	0	0	A6QNK1	Galactosylceramide sulfotransferase (GalCer sulfotransferase) (EC 2.8.2.11) (3'-phosphoadenosine-5'-phosphosulfate:GalCer sulfotransferase) (3'-phosphoadenylylsulfate:galactosylceramide 3'-sulfotransferase) (Cerebroside sulfotransferase)	Gal3st1	Cst	Gcst
TRINITY_DN21611_c0_g4	0	0	0	0	0	A0AUV4	Sperm motility kinase Y (EC 2.7.11.1)	Gm7168
TRINITY_DN2166_c0_g1	0	0	0	0	0	O60218	Aldo-keto reductase family 1 member B7 (EC 1.1.1.21) (Aldehyde reductase) (AR) (Aldose reductase-related protein 1) (MVDP) (Vas deferens androgen-dependent protein)	Akr1b7	Avdp
TRINITY_DN2167_c0_g1	0	0	0	0	0	O60293	#N/A	#N/A
TRINITY_DN2168_c0_g1	0	0	0	0	0	Q8N0Z6	Tetratricopeptide repeat protein 5 (TPR repeat protein 5) (Stress-responsive activator of p300)	Ttc5	Strap
TRINITY_DN2169_c2_g1	0	0	0	0	0	O00187	Adhesion G-protein coupled receptor G6 (Developmentally regulated G-protein-coupled receptor) (G-protein coupled receptor 126) [Cleaved into: ADGRG6 N-terminal fragment (ADGRG6-NTF); ADGRG6 C-terminal fragment (ADGRG6-CTF)]	Adgrg6	Dreg	Gm222	Gpr126
TRINITY_DN21694_c0_g1	0	0	0	0	0	Q2EMV9	Protein mono-ADP-ribosyltransferase PARP14 (EC 2.4.2.-) (ADP-ribosyltransferase diphtheria toxin-like 8) (ARTD8) (Collaborator of STAT6) (CoaSt6) (Poly [ADP-ribose] polymerase 14) (PARP-14)	Parp14	Kiaa1268
TRINITY_DN21699_c0_g1	0	0	0	0	0	Q66S03	Collectin-10 (Collectin liver protein 1) (CL-L1)	Colec10	Cll1
TRINITY_DN21700_c0_g1	0	0	0	0	0	P55809	Succinyl-CoA:3-ketoacid coenzyme A transferase 1, mitochondrial (EC 2.8.3.5) (3-oxoacid CoA-transferase 1) (Somatic-type succinyl-CoA:3-oxoacid CoA-transferase) (SCOT-s)	Oxct1	Oxct	Scot
TRINITY_DN21714_c0_g1	0	0	0	0	0	O35814	Stress-induced-phosphoprotein 1 (STI1) (mSTI1) (Hsc70/Hsp90-organizing protein) (Hop)	Stip1
TRINITY_DN2172_c0_g1	0	0	0	0	0	Q6AYU1	Mortality factor 4-like protein 1 (MORF-related gene 15 protein) (Testis-expressed gene 189 protein) (Transcription factor-like protein MRG15)	Morf4l1	Mrg15	Tex189
TRINITY_DN21753_c0_g1	0	0	0	0	0	Q8C172	Ceramide synthase 6 (CerS6) (EC 2.3.1.-) (LAG1 longevity assurance homolog 6)	Cers6	Lass6
TRINITY_DN21764_c0_g1	0	0	0	0	0	Q5XEP2	#N/A	#N/A
TRINITY_DN21777_c0_g1	0	0	0	0	0	Q0MQJ3	#N/A	#N/A
TRINITY_DN21780_c0_g1	0	0	0	0	0	Q9NYU1	UDP-glucose:glycoprotein glucosyltransferase 1 (UGT1) (EC 2.4.1.-) (UDP--Glc:glycoprotein glucosyltransferase) (UDP-glucose ceramide glucosyltransferase-like 1)	Uggt1	Gt	Ugcgl1	Uggt	Ugt1	Ugtr
TRINITY_DN218_c0_g1	0	0	0	0	0	F1RCP1	Beclin-1 (Coiled-coil myosin-like BCL2-interacting protein) [Cleaved into: Beclin-1-C 35 kDa; Beclin-1-C 37 kDa]	Becn1
TRINITY_DN21801_c4_g1	0	0	0	0	0	Q1ECZ2	Actin-binding protein IPP (Intracisternal A particle-promoted polypeptide) (IPP) (Murine IAP-promoted placenta-expressed protein) (Protein MIPP)	Ipp	Mipp
TRINITY_DN21844_c0_g1	0	0	0	0	0	Q6J9G1	Tyrosine-protein kinase STYK1 (EC 2.7.10.2) (Novel oncogene with kinase domain) (mNOK) (Serine/threonine/tyrosine kinase 1)	Styk1	Nok
TRINITY_DN21848_c0_g1	0	0	0	0	0	O97302	#N/A	#N/A
TRINITY_DN21887_c0_g1	0	0	0	0	0	A0A0R4IBK5	E3 ubiquitin-protein ligase RNF213 (EC 2.3.2.27) (EC 3.6.4.-) (Mysterin) (RING finger protein 213) (RING-type E3 ubiquitin transferase RNF213)	Rnf213	Mystr
TRINITY_DN21892_c0_g1	0	0	0	0	0	O35453	#N/A	#N/A
TRINITY_DN219_c0_g1	0	0	0	0	0	Q5PQP1	RNA-binding motif, single-stranded-interacting protein 1 (Single-stranded DNA-binding protein MSSP-1)	Rbms1	Mssp	Mssp1
TRINITY_DN21928_c0_g1	0	0	0	0	0	B0WWP2	Kelch-like protein 3	Klhl3
TRINITY_DN21949_c0_g1	0	0	0	0	0	E9Q555	E3 ubiquitin-protein ligase RNF213 (EC 2.3.2.27) (EC 3.6.4.-) (Mysterin) (RING finger protein 213) (RING-type E3 ubiquitin transferase RNF213)	Rnf213	Mystr
TRINITY_DN2195_c1_g1	0	0	0	0	0	Q4V348	Zinc finger protein 569 (Mszf21) (Zinc finger protein 74) (Zfp-74)	Znf569	Zfp74
TRINITY_DN2195_c1_g2	0	0	0	0	0	A2T812	Zinc finger protein 287 (Zfp-287) (Zinc finger protein SKAT-2)	Znf287	Skat2	Zfp287
TRINITY_DN2195_c1_g4	0	0	0	0	0	P0CG24	Zinc finger protein 62 (Zfp-62) (ZT3)	Zfp62
TRINITY_DN2196_c2_g2	0	0	0	0	0	O57590	Surfeit locus protein 4	Surf4	Surf-4
TRINITY_DN21961_c0_g1	0	0	0	0	0	Q5EB14	Sugar transporter SWEET1 (MmSWEET1) (RAG1-activating protein 1) (Solute carrier family 50 member 1)	Slc50a1	Rag1ap1	Rga
TRINITY_DN220_c0_g1	0	0	0	0	0	P61265	Syntaxin-1B	Stx1b	Stx1b1	Stx1b2
TRINITY_DN22000_c0_g1	0	0	0	0	0	O18894	H(+)/Cl(-) exchange transporter 3 (Chloride channel protein 3) (ClC-3) (Chloride transporter ClC-3)	Clcn3	Clc3
TRINITY_DN22038_c0_g1	0	0	0	0	0	O00187	Mannan-binding lectin serine protease 2 (EC 3.4.21.104) (MBL-associated serine protease 2) (Mannose-binding protein-associated serine protease 2) (MASP-2) [Cleaved into: Mannan-binding lectin serine protease 2 A chain; Mannan-binding lectin serine protease 2 B chain]	Masp2
TRINITY_DN2204_c0_g1	0	0	0	0	0	Q8BJ83	TM2 domain-containing protein 3	Tm2d3
TRINITY_DN22073_c0_g1	0	0	0	0	0	Q86WI1	Fibrocystin-L (Polycystic kidney and hepatic disease 1-like protein 1) (PKHD1-like protein 1) (Protein D86)	Pkhd1l1
TRINITY_DN22096_c0_g2	0	0	0	0	0	D3ZA76	Serine protease HTRA3 (EC 3.4.21.-) (High-temperature requirement factor A3) (Pregnancy-related serine protease) (Toll-associated serine protease)	Htra3	Prsp	Tasp
TRINITY_DN22099_c0_g1	0	0	0	0	0	P20735	Glutathione hydrolase 1 proenzyme (EC 3.4.19.13) (Gamma-glutamyltransferase 1) (Gamma-glutamyltranspeptidase 1) (GGT 1) (EC 2.3.2.2) (Leukotriene-C4 hydrolase) (EC 3.4.19.14) (CD antigen CD224) [Cleaved into: Glutathione hydrolase 1 heavy chain; Glutathione hydrolase 1 light chain]	Ggt1	Ggt	Ggtp
TRINITY_DN22103_c0_g1	0	0	0	0	0	D3ZDI6	Baculoviral IAP repeat-containing protein 3 (EC 2.3.2.27) (Cellular inhibitor of apoptosis 2) (C-IAP2) (Inhibitor of apoptosis protein 1) (mIAP1) (RING-type E3 ubiquitin transferase BIRC3)	Birc3
TRINITY_DN22115_c0_g1	0	0	0	0	0	Q9JLQ0	CD2-associated protein (Mesenchyme-to-epithelium transition protein with SH3 domains 1) (METS-1)	Cd2ap	Mets1
TRINITY_DN2212_c0_g1	0	0	0	0	0	Q15643	#N/A	#N/A
TRINITY_DN22124_c0_g1	0	0	0	0	0	Q9W5U2	#N/A	#N/A
TRINITY_DN22146_c0_g1	0	0	0	0	0	Q96DM1	#N/A	#N/A
TRINITY_DN2215_c0_g1	0	0	0	0	0	Q9R1J8	Prolyl 3-hydroxylase 1 (EC 1.14.11.7) (Growth suppressor 1) (Leucine- and proline-enriched proteoglycan 1) (Leprecan-1)	P3h1	Gros1	Lepre1
TRINITY_DN22158_c0_g1	0	0	0	0	0	Q8NDV1	Alpha-N-acetyl-neuraminyl-2,3-beta-galactosyl-1,3-N-acetyl-galactosaminide alpha-2,6-sialyltransferase (EC 2.4.99.7) (NeuAc-alpha-2,3-Gal-beta-1,3-GalNAc-alpha-2,6-sialyltransferase) (ST6GalNAc IV) (ST6GalNAcIV) (Sialyltransferase 7D) (SIAT7-D)	St6galnac4	Siat7d
TRINITY_DN22184_c0_g1	0	0	0	0	0	P29594	Caspase-2 (CASP-2) (EC 3.4.22.55) (Neural precursor cell expressed developmentally down-regulated protein 2) (NEDD-2) (Protease ICH-1) [Cleaved into: Caspase-2 subunit p18; Caspase-2 subunit p13; Caspase-2 subunit p12]	Casp2	Ich1	Nedd-2	Nedd2
TRINITY_DN2222_c0_g1	0	0	0	0	0	O12947	Protein-S-isoprenylcysteine O-methyltransferase (EC 2.1.1.100) (Isoprenylcysteine carboxylmethyltransferase) (Prenylated protein carboxyl methyltransferase) (PPMT) (Prenylcysteine carboxyl methyltransferase) (pcCMT)	Icmt
TRINITY_DN2224_c0_g2	0	0	0	0	0	P02707	#N/A	#N/A
TRINITY_DN22253_c0_g1	0	0	0	0	0	Q90YM5	Organic solute transporter subunit alpha (OST-alpha) (Solute carrier family 51 subunit alpha)	Slc51a	Osta
TRINITY_DN22269_c0_g1	0	0	0	0	0	Q05940	Synaptic vesicular amine transporter (Monoamine transporter) (Solute carrier family 18 member 2) (Vesicular amine transporter 2) (VAT2)	Slc18a2	Vmat2
TRINITY_DN22272_c0_g3	0	0	0	0	0	O08600	Endonuclease G, mitochondrial (Endo G) (EC 3.1.30.-)	Endog
TRINITY_DN2229_c0_g1	0	0	0	0	0	Q99PV0	Pre-mRNA-processing-splicing factor 8 (Splicing factor Prp8)	Prpf8	Prp8
TRINITY_DN22301_c0_g1	0	0	0	0	0	F7BWT7	Tetraspanin-15 (Tspan-15) (Transmembrane 4 superfamily member 15)	Tspan15
TRINITY_DN2232_c0_g1	0	0	0	0	0	P16381	Putative ATP-dependent RNA helicase Pl10 (EC 3.6.4.13)	D1Pas1	Pl10
TRINITY_DN22320_c0_g4	0	0	0	0	0	Q14112	#N/A	#N/A
TRINITY_DN22327_c0_g1	0	0	0	0	0	P98158	Low-density lipoprotein receptor-related protein 2 (LRP-2) (Glycoprotein 330) (gp330) (Megalin)	Lrp2
TRINITY_DN22345_c0_g1	0	0	0	0	0	Q8N394	#N/A	#N/A
TRINITY_DN22353_c0_g1	0	0	0	0	0	Q8C9E8	Calcium homeostasis modulator protein 6 (Protein FAM26F)	Calhm6	Fam26f
TRINITY_DN22355_c0_g1	0	0	0	0	0	Q5NVM9	Heat shock cognate 71 kDa protein (Heat shock 70 kDa protein 8)	Hspa8	Hsc70	Hsc73
TRINITY_DN22367_c0_g1	0	0	0	0	0	Q9EQY0	Serine/threonine-protein kinase/endoribonuclease IRE1 (Endoplasmic reticulum-to-nucleus signaling 1) (Inositol-requiring protein 1) (Ire1-alpha) (IRE1a) [Includes: Serine/threonine-protein kinase (EC 2.7.11.1); Endoribonuclease (EC 3.1.26.-)]	Ern1	Ire1
TRINITY_DN2237_c0_g1	0	0	0	0	0	P13804	Electron transfer flavoprotein subunit alpha, mitochondrial (Alpha-ETF)	Etfa
TRINITY_DN22399_c0_g5	0	0	0	0	0	Q9P2G9	#N/A	#N/A
TRINITY_DN2241_c0_g1	0	0	0	0	0	Q9Y2Q3	Glutathione S-transferase kappa 1 (EC 2.5.1.18) (GST 13-13) (GST class-kappa) (GSTK1-1) (mGSTK1) (Glutathione S-transferase subunit 13)	Gstk1
TRINITY_DN2244_c0_g1	0	0	0	0	0	P30682	Guanine nucleotide-binding protein G(i) subunit alpha-1 (Adenylate cyclase-inhibiting G alpha protein)	Gnai1	Gnai-1
TRINITY_DN22450_c0_g1	0	0	0	0	0	Q63041	#N/A	#N/A
TRINITY_DN22479_c0_g1	0	0	0	0	0	P48199	Serum amyloid P-component (SAP)	Apcs	Ptx2	Sap
TRINITY_DN22480_c0_g1	0	0	0	0	0	C3VPR6	#N/A	#N/A
TRINITY_DN2249_c0_g1	0	0	0	0	0	P35658	Nuclear pore complex protein Nup214 (214 kDa nucleoporin) (Nucleoporin Nup214)	Nup214	Kiaa0023
TRINITY_DN2250_c0_g1	0	0	0	0	0	Q9Y5X2	Sorting nexin-8	Snx8
TRINITY_DN22513_c0_g1	0	0	0	0	0	P85977	Zinc finger protein OZF (Only zinc finger protein) (Zinc finger protein 146)	Znf146	Ozf	Zfp146
TRINITY_DN22527_c0_g1	0	0	0	0	0	O70249	N-glycosylase/DNA lyase [Includes: 8-oxoguanine DNA glycosylase (EC 3.2.2.-); DNA-(apurinic or apyrimidinic site) lyase (AP lyase) (EC 4.2.99.18)]	Ogg1
TRINITY_DN2253_c0_g1	0	0	0	0	0	Q96PS8	Aquaporin-3 (AQP-3) (Aquaglyceroporin-3)	Aqp3
TRINITY_DN22542_c0_g1	0	0	0	0	0	Q460N5	Protein mono-ADP-ribosyltransferase PARP14 (EC 2.4.2.-) (ADP-ribosyltransferase diphtheria toxin-like 8) (ARTD8) (Collaborator of STAT6) (CoaSt6) (Poly [ADP-ribose] polymerase 14) (PARP-14)	Parp14	Kiaa1268
TRINITY_DN2259_c0_g1	0	0	0	0	0	Q4R3S3	Ankyrin repeat domain-containing protein 7	Ankrd7
TRINITY_DN2259_c0_g2	0	0	0	0	0	Q32LE3	Centrin-2 (Caltractin isoform 1)	Cetn2	Calt
TRINITY_DN22593_c0_g1	0	0	0	0	0	A9ULZ2	#N/A	#N/A
TRINITY_DN2262_c0_g1	0	0	0	0	0	Q6PAV2	Probable E3 ubiquitin-protein ligase HERC4 (EC 2.3.2.26) (HECT domain and RCC1-like domain-containing protein 4) (HECT-type E3 ubiquitin transferase HERC4)	Herc4
TRINITY_DN22627_c0_g1	0	0	0	0	0	Q86WI3	#N/A	#N/A
TRINITY_DN2263_c0_g1	0	0	0	0	0	O08836	Immunoglobulin-binding protein 1 (Alpha4 phosphoprotein) (CD79a-binding protein 1) (Lymphocyte signal transduction molecule alpha 4) (Protein phosphatase 2/4/6 regulatory subunit) (p52)	Igbp1	Pc52
TRINITY_DN22638_c0_g1	0	0	0	0	0	A0JNB1	Zinc finger protein 271 (Zinc finger protein 35) (Zfp-35)	Znf271	Zfp-35	Zfp35
TRINITY_DN22649_c0_g1	0	0	0	0	0	F1N9Y5	Tyrosine-protein kinase ZAP-70 (EC 2.7.10.2) (70 kDa zeta-chain associated protein) (Syk-related tyrosine kinase)	Zap70	Srk	Zap-70
TRINITY_DN2266_c1_g1	0	0	0	0	0	A8Y1P7	Beta-1,4-galactosyltransferase 1 (Beta-1,4-GalTase 1) (Beta4Gal-T1) (b4Gal-T1) (EC 2.4.1.-) (Beta-N-acetylglucosaminyl-glycolipid beta-1,4-galactosyltransferase) (Beta-N-acetylglucosaminylglycopeptide beta-1,4-galactosyltransferase) (EC 2.4.1.38) (Lactose synthase A protein) (EC 2.4.1.22) (N-acetyllactosamine synthase) (EC 2.4.1.90) (Nal synthase) (Neolactotriaosylceramide beta-1,4-galactosyltran…	B4galt1	Ggtb	Ggtb2
TRINITY_DN22665_c0_g1	0	0	0	0	0	Q9NBX4	#N/A	#N/A
TRINITY_DN22668_c0_g1	0	0	0	0	0	Q3ZC89	#N/A	#N/A
TRINITY_DN22671_c0_g1	0	0	0	0	0	P27615	Lysosome membrane protein 2 (85 kDa lysosomal membrane sialoglycoprotein) (LGP85) (Lysosome membrane protein II) (LIMP II) (Scavenger receptor class B member 2)	Scarb2
TRINITY_DN2273_c0_g1	0	0	0	0	0	Q5M939	Histone acetyltransferase type B catalytic subunit (EC 2.3.1.48) (Histone acetyltransferase 1)	Hat1
TRINITY_DN22758_c0_g1	0	0	0	0	0	Q01082	Spectrin beta chain, non-erythrocytic 1 (Beta-II spectrin) (Embryonic liver fodrin) (Fodrin beta chain)	Sptbn1	Elf	Spnb-2	Spnb2	Sptb2
TRINITY_DN2276_c0_g1	0	0	0	0	0	Q16739	Ceramide glucosyltransferase (EC 2.4.1.80) (GLCT-1) (Glucosylceramide synthase) (GCS) (UDP-glucose ceramide glucosyltransferase) (UDP-glucose:N-acylsphingosine D-glucosyltransferase)	Ugcg
TRINITY_DN22762_c0_g2	0	0	0	0	0	Q11127	Alpha-(1,3)-fucosyltransferase 4 (EC 2.4.1.-) (Fucosyltransferase 4) (Fucosyltransferase IV) (Fuc-TIV) (FucT-IV) (Galactoside 3-L-fucosyltransferase)	Fut4	Elft
TRINITY_DN2277_c0_g1	0	0	0	0	0	F1R345	ATP-dependent DNA helicase DDX11 (EC 3.6.4.12) (DEAD/H-box protein 11)	Ddx11
TRINITY_DN2284_c0_g1	0	0	0	0	0	Q810N6	Ankyrin repeat domain-containing protein 45	Ankrd45
TRINITY_DN2285_c0_g1	0	0	0	0	0	Q9UKV3	Apoptotic chromatin condensation inducer in the nucleus (Acinus)	Acin1	Acinus
TRINITY_DN2286_c0_g1	0	0	0	0	0	Q32L41	GTP cyclohydrolase 1 feedback regulatory protein (GFRP) (GTP cyclohydrolase I feedback regulatory protein) (p35)	Gchfr	Gfrp
TRINITY_DN22860_c0_g1	0	0	0	0	0	E9Q555	E3 ubiquitin-protein ligase RNF213 (EC 2.3.2.27) (EC 3.6.4.-) (Mysterin) (RING finger protein 213) (RING-type E3 ubiquitin transferase RNF213)	Rnf213	Mystr
TRINITY_DN22880_c0_g1	0	0	0	0	0	Q6INL2	#N/A	#N/A
TRINITY_DN22880_c0_g2	0	0	0	0	0	Q6INL2	#N/A	#N/A
TRINITY_DN22885_c0_g1	0	0	0	0	0	Q96JB1	Dynein heavy chain 8, axonemal (Axonemal beta dynein heavy chain 8) (Ciliary dynein heavy chain 8)	Dnah8	Dnahc8
TRINITY_DN22904_c0_g1	0	0	0	0	0	P33121	Long-chain-fatty-acid--CoA ligase 1 (EC 6.2.1.3) (Arachidonate--CoA ligase) (EC 6.2.1.15) (Long-chain acyl-CoA synthetase 1) (LACS 1) (Phytanate--CoA ligase) (EC 6.2.1.24)	Acsl1	Acsl2	Facl2
TRINITY_DN22911_c0_g1	0	0	0	0	0	Q5R7B8	#N/A	#N/A
TRINITY_DN22936_c0_g1	0	0	0	0	0	C3VPR6	Protein NLRC5	Nlrc5
TRINITY_DN22940_c0_g1	0	0	0	0	0	A0A0R4IBK5	E3 ubiquitin-protein ligase RNF213 (EC 2.3.2.27) (EC 3.6.4.-) (Mysterin) (RING finger protein 213) (RING-type E3 ubiquitin transferase RNF213)	Rnf213	Mystr
TRINITY_DN22953_c0_g1	0	0	0	0	0	O08863	Baculoviral IAP repeat-containing protein 3 (EC 2.3.2.27) (Cellular inhibitor of apoptosis 2) (C-IAP2) (Inhibitor of apoptosis protein 1) (mIAP1) (RING-type E3 ubiquitin transferase BIRC3)	Birc3
TRINITY_DN2296_c0_g1	0	0	0	0	0	Q0VBN2	Dermatan-sulfate epimerase-like protein (EC 5.1.-.-)	Dsel
TRINITY_DN2297_c0_g1	0	0	0	0	0	P29540	General transcription factor IIE subunit 2 (Transcription initiation factor IIE subunit beta) (TFIIE-beta)	Gtf2e2
TRINITY_DN22995_c0_g1	0	0	0	0	0	D8VNS8	Ficolin-2 (Collagen/fibrinogen domain-containing protein 2) (Ficolin-B) (Ficolin-beta) (L-ficolin)	Fcn2	Fcnb
TRINITY_DN2304_c0_g1	0	0	0	0	0	Q9H2Y7	Zinc finger protein 106 (Zfp-106) (H3a minor histocompatibility antigen) (Son of insulin receptor mutant) (Zinc finger protein 474)	Znf106	H3a	Sh3bp3	Sirm	Zfp106	Znf474
TRINITY_DN23068_c0_g1	0	0	0	0	0	O43432	#N/A	#N/A
TRINITY_DN2309_c0_g1	0	0	0	0	0	Q9NDJ2	E1A-binding protein p400 (EC 3.6.4.-) (Domino homolog) (mDomino) (p400 kDa SWI2/SNF2-related protein)	Ep400	Kiaa1498
TRINITY_DN23090_c0_g1	0	0	0	0	0	Q460N5	Protein mono-ADP-ribosyltransferase PARP14 (EC 2.4.2.-) (ADP-ribosyltransferase diphtheria toxin-like 8) (ARTD8) (Collaborator of STAT6) (CoaSt6) (Poly [ADP-ribose] polymerase 14) (PARP-14)	Parp14	Kiaa1268
TRINITY_DN231268_c0_g1	0	0	0	0	0	Q8N695	Sodium-coupled monocarboxylate transporter 1 (Electrogenic sodium monocarboxylate cotransporter) (Solute carrier family 5 member 8)	Slc5a8	Smct	Smct1
TRINITY_DN23132_c0_g1	0	0	0	0	0	Q63184	STE20/SPS1-related proline-alanine-rich protein kinase (Ste-20-related kinase) (EC 2.7.11.1) (Serine/threonine-protein kinase 39)	Stk39	Spak
TRINITY_DN23133_c0_g1	0	0	0	0	0	O35904	Phosphatidylinositol 4,5-bisphosphate 3-kinase catalytic subunit delta isoform (PI3-kinase subunit delta) (PI3K-delta) (PI3Kdelta) (PtdIns-3-kinase subunit delta) (EC 2.7.1.153) (Phosphatidylinositol 4,5-bisphosphate 3-kinase 110 kDa catalytic subunit delta) (PtdIns-3-kinase subunit p110-delta) (p110delta)	Pik3cd
TRINITY_DN23144_c0_g1	0	0	0	0	0	Q95218	Macrophage receptor MARCO (Macrophage receptor with collagenous structure)	Marco
TRINITY_DN2316_c0_g2	0	0	0	0	0	O93530	Werner syndrome ATP-dependent helicase homolog (EC 3.6.4.12) (Exonuclease WRN) (EC 3.1.-.-)	Wrn
TRINITY_DN23180_c0_g2	0	0	0	0	0	Q28065	#N/A	#N/A
TRINITY_DN231920_c0_g1	0	0	0	0	0	P27080	ADP/ATP translocase 2 (ADP,ATP carrier protein 2) (Adenine nucleotide translocator 2) (ANT 2) (Solute carrier family 25 member 5) [Cleaved into: ADP/ATP translocase 2, N-terminally processed]	Slc25a5	Ant2
TRINITY_DN232_c0_g1	0	0	0	0	0	P13010	X-ray repair cross-complementing protein 5 (EC 3.6.4.-) (ATP-dependent DNA helicase 2 subunit 2) (ATP-dependent DNA helicase II 80 kDa subunit) (CTC box-binding factor 85 kDa subunit) (CTC85) (CTCBF) (DNA repair protein XRCC5) (Ku autoantigen protein p86 homolog) (Ku80) (Nuclear factor IV)	Xrcc5	G22p2
TRINITY_DN23209_c0_g1	0	0	0	0	0	A0JPE9	Putative glycerol kinase 5 (GK 5) (Glycerokinase 5) (EC 2.7.1.30) (ATP:glycerol 3-phosphotransferase 5)	Gk5
TRINITY_DN2323_c0_g1	0	0	0	0	0	Q91WQ5	TAF5-like RNA polymerase II p300/CBP-associated factor-associated factor 65 kDa subunit 5L (TAF5L) (PCAF-associated factor 65 beta) (PAF65-beta)	Taf5l	Paf65b
TRINITY_DN2323_c0_g2	0	0	0	0	0	Q91WQ5	TAF5-like RNA polymerase II p300/CBP-associated factor-associated factor 65 kDa subunit 5L (TAF5L) (PCAF-associated factor 65 beta) (PAF65-beta)	Taf5l	Paf65b
TRINITY_DN2324_c0_g1	0	0	0	0	0	B2RX14	Terminal uridylyltransferase 4 (TUTase 4) (EC 2.7.7.52) (Zinc finger CCHC domain-containing protein 11)	Tut4	Kiaa0191	Zcchc11
TRINITY_DN23254_c0_g1	0	0	0	0	0	Q920Q8	Influenza virus NS1A-binding protein homolog (NS1-BP) (NS1-binding protein homolog) (Kelch family protein Nd1-L) (ND1-L2) (Nd1-S)	Ivns1abp	Kiaa0850	Nd1	Nd1L	Nd1S	Ns1	Ns1bp
TRINITY_DN23254_c0_g3	0	0	0	0	0	Q8R2H4	Kelch-like protein 12 (CUL3-interacting protein 1)	Klhl12	C3ip1
TRINITY_DN2327_c0_g2	0	0	0	0	0	O16025	Polyunsaturated fatty acid 5-lipoxygenase (EC 1.13.11.-) (Arachidonate 5-lipoxygenase) (5-LO) (5-lipoxygenase) (EC 1.13.11.34)	Alox5
TRINITY_DN2328_c0_g1	0	0	0	0	0	Q15111	Inactive phospholipase C-like protein 2 (PLC-L(2)) (PLC-L2) (Phospholipase C-L2) (Phospholipase C-epsilon-2) (PLC-epsilon-2)	Plcl2	Kiaa1092	Plce2
TRINITY_DN23280_c0_g5	0	0	0	0	0	Q9JLL0	Cysteine-rich motor neuron 1 protein (CRIM-1)	Crim1
TRINITY_DN23287_c0_g1	0	0	0	0	0	Q9C5S2	Serine/threonine-protein kinase/endoribonuclease IRE1 (Endoplasmic reticulum-to-nucleus signaling 1) (Inositol-requiring protein 1) (Ire1-alpha) (IRE1a) [Includes: Serine/threonine-protein kinase (EC 2.7.11.1); Endoribonuclease (EC 3.1.26.-)]	Ern1	Ire1
TRINITY_DN2331_c2_g2	0	0	0	0	0	Q5U1Z2	Trafficking protein particle complex subunit 3 (BET3 homolog)	Trappc3	Bet3
TRINITY_DN23311_c0_g1	0	0	0	0	0	O00370	LINE-1 retrotransposable element ORF2 protein (ORF2p) (Long interspersed element-1) (L1) (Retrovirus-related Pol polyprotein LINE-1) [Includes: Reverse transcriptase (EC 2.7.7.49); Endonuclease (EC 3.1.21.-)]	Pol	Gm17492
TRINITY_DN233158_c0_g1	0	0	0	0	0	Q9JI74	Kelch-like protein 1	Klhl1
TRINITY_DN23320_c1_g1	0	0	0	0	0	Q02977	Tyrosine-protein kinase Fyn (EC 2.7.10.2) (Proto-oncogene c-Fyn) (p59-Fyn)	Fyn
TRINITY_DN23330_c0_g1	0	0	0	0	0	Q9D8V0	Minor histocompatibility antigen H13 (EC 3.4.23.-) (Presenilin-like protein 3) (Signal peptide peptidase)	Hm13	H13	Psl3
TRINITY_DN2334_c0_g1	0	0	0	0	0	Q5RJI4	Extracellular tyrosine-protein kinase PKDCC (EC 2.7.10.2) (Protein kinase domain-containing protein, cytoplasmic) (Protein kinase-like protein SgK493) (Sugen kinase 493) (Vertebrate lonesome kinase)	Pkdcc	Sgk493	Vlk
TRINITY_DN2337_c0_g1	0	0	0	0	0	Q9H0A0	RNA cytidine acetyltransferase (EC 2.3.1.-) (18S rRNA cytosine acetyltransferase) (N-acetyltransferase 10)	Nat10	Kiaa1709
TRINITY_DN23383_c0_g1	0	0	0	0	0	Q53G59	Kelch-like protein 12 (CUL3-interacting protein 1)	Klhl12	C3ip1
TRINITY_DN23403_c0_g1	0	0	0	0	0	O55092	#N/A	#N/A
TRINITY_DN23408_c0_g1	0	0	0	0	0	O75460	Serine/threonine-protein kinase/endoribonuclease IRE1 (Endoplasmic reticulum-to-nucleus signaling 1) (Inositol-requiring protein 1) (Ire1-alpha) (IRE1a) [Includes: Serine/threonine-protein kinase (EC 2.7.11.1); Endoribonuclease (EC 3.1.26.-)]	Ern1	Ire1
TRINITY_DN23432_c0_g1	0	0	0	0	0	P28207	Receptor-type tyrosine-protein phosphatase V (R-PTP-V) (EC 3.1.3.48) (Embryonic stem cell protein-tyrosine phosphatase) (ES cell phosphatase)	Ptprv	Esp
TRINITY_DN23432_c0_g2	0	0	0	0	0	Q9IBD8	Receptor-type tyrosine-protein phosphatase V (R-PTP-V) (EC 3.1.3.48) (Embryonic stem cell protein-tyrosine phosphatase) (ES cell phosphatase)	Ptprv	Esp
TRINITY_DN23434_c0_g1	0	0	0	0	0	P27398	Calpain-15 (EC 3.4.22.-) (Small optic lobes homolog)	Capn15	Solh
TRINITY_DN23451_c0_g1	0	0	0	0	0	Q66S03	#N/A	#N/A
TRINITY_DN2348_c0_g1	0	0	0	0	0	Q3T1J9	MOB kinase activator 1A (Mob1 homolog 1B) (Mps one binder kinase activator-like 1B)	Mob1a	Mobk1b	Mobkl1b
TRINITY_DN2349_c0_g1	0	0	0	0	0	P41778	Pre-B-cell leukemia transcription factor 1 (Homeobox protein PBX1)	Pbx1	Pbx-1
TRINITY_DN23495_c0_g1	0	0	0	0	0	O08914	Fatty-acid amide hydrolase 1 (EC 3.5.1.99) (Anandamide amidohydrolase 1) (Fatty acid ester hydrolase) (EC 3.1.1.-) (Oleamide hydrolase 1)	Faah	Faah1
TRINITY_DN235_c0_g1	0	0	0	0	0	B0JZG0	Solute carrier family 23 member 1 (Na(+)/L-ascorbic acid transporter 1) (Sodium-dependent vitamin C transporter 1) (Yolk sac permease-like molecule 3)	Slc23a1	Svct1	Yspl3
TRINITY_DN235_c1_g1	0	0	0	0	0	B0JZG0	Solute carrier family 23 member 2 (Na(+)/L-ascorbic acid transporter 2) (Sodium-dependent vitamin C transporter 2) (SVCT-2) (mSVCT2) (Yolk sac permease-like molecule 2)	Slc23a2	Kiaa0238	Svct2	Yspl2
TRINITY_DN2351_c0_g1	0	0	0	0	0	Q8BMJ2	Leucine--tRNA ligase, cytoplasmic (EC 6.1.1.4) (Leucyl-tRNA synthetase) (LeuRS)	Lars1	Lars
TRINITY_DN23522_c0_g1	0	0	0	0	0	Q5ZJW4	Vesicle-trafficking protein SEC22b (ER-Golgi SNARE of 24 kDa) (ERS-24) (ERS24) (SEC22 vesicle-trafficking protein homolog B) (SEC22 vesicle-trafficking protein-like 1) (mSec22b)	Sec22b	Sec22l1
TRINITY_DN23543_c0_g1	0	0	0	0	0	Q26228	X-ray repair cross-complementing protein 6 (EC 3.6.4.-) (EC 4.2.99.-) (5'-deoxyribose-5-phosphate lyase Ku70) (5'-dRP/AP lyase Ku70) (ATP-dependent DNA helicase 2 subunit 1) (ATP-dependent DNA helicase II 70 kDa subunit) (CTC box-binding factor 75 kDa subunit) (CTC75) (CTCBF) (DNA repair protein XRCC6) (Ku autoantigen protein p70 homolog) (Ku70)	Xrcc6	G22p1	Ku70
TRINITY_DN23545_c0_g2	0	0	0	0	0	Q865F1	#N/A	#N/A
TRINITY_DN2355_c0_g2	0	0	0	0	0	Q8BUL6	Pleckstrin homology domain-containing family A member 1 (PH domain-containing family A member 1) (Tandem PH domain-containing protein 1) (TAPP-1)	Plekha1	Tapp1
TRINITY_DN23561_c0_g1	0	0	0	0	0	Q6A4L0	Solute carrier family 22 member 13 (Organic cation transporter-like 3) (ORCTL-3)	Slc22a13	Orctl3
TRINITY_DN236_c0_g1	0	0	0	0	0	Q71U34	Heat shock cognate 71 kDa protein (Heat shock 70 kDa protein 8)	Hspa8	Hsc70	Hsc73
TRINITY_DN23613_c0_g1	0	0	0	0	0	Q86W92	Liprin-beta-1 (Protein tyrosine phosphatase receptor type f polypeptide-interacting protein-binding protein 1) (PTPRF-interacting protein-binding protein 1)	Ppfibp1	Kiaa1230
TRINITY_DN23615_c0_g1	0	0	0	0	0	Q68ED3	Terminal nucleotidyltransferase 4B (Non-canonical poly(A) RNA polymerase PAPD5) (EC 2.7.7.19) (PAP-associated domain-containing protein 5) (Terminal guanylyltransferase) (EC 2.7.7.-) (Terminal uridylyltransferase 3) (TUTase 3) (Topoisomerase-related function protein 4-2) (TRF4-2)	Tent4b	Papd5
TRINITY_DN23641_c0_g1	0	0	0	0	0	Q5I085	Serine/threonine-protein phosphatase PP1-beta catalytic subunit (PP-1B) (EC 3.1.3.16) (EC 3.1.3.53)	Ppp1cb
TRINITY_DN23671_c0_g1	0	0	0	0	0	Q6NUC1	#N/A	#N/A
TRINITY_DN2368_c0_g1	0	0	0	0	0	Q9WUP7	Ubiquitin carboxyl-terminal hydrolase isozyme L5 (UCH-L5) (EC 3.4.19.12) (Ubiquitin C-terminal hydrolase UCH37) (Ubiquitin thioesterase L5)	Uchl5	Uch37
TRINITY_DN2369_c0_g1	0	0	0	0	0	Q9DGK4	Translationally-controlled tumor protein (TCTP) (21 kDa polypeptide) (p21) (p23)	Tpt1	Trt
TRINITY_DN23702_c0_g1	0	0	0	0	0	Q9EQY0	Serine/threonine-protein kinase/endoribonuclease IRE1 (Endoplasmic reticulum-to-nucleus signaling 1) (Inositol-requiring protein 1) (Ire1-alpha) (IRE1a) [Includes: Serine/threonine-protein kinase (EC 2.7.11.1); Endoribonuclease (EC 3.1.26.-)]	Ern1	Ire1
TRINITY_DN23710_c0_g1	0	0	0	0	0	Q5U374	Kelch-like protein 12 (CUL3-interacting protein 1)	Klhl12	C3ip1
TRINITY_DN23711_c0_g1	0	0	0	0	0	P27042	Lysozyme g-like protein 2 (EC 3.2.1.-)	Lyg2	Gm776
TRINITY_DN23720_c0_g1	0	0	0	0	0	P97346	Nucleoredoxin (EC 1.8.1.8) (Protein Red-1)	Nxn	Gn25
TRINITY_DN23748_c0_g1	0	0	0	0	0	Q9HAT2	Sialate O-acetylesterase (EC 3.1.1.53) (Sialic acid-specific 9-O-acetylesterase) (Yolk sac protein 2) [Cleaved into: Sialate O-acetylesterase small subunit; Sialate O-acetylesterase large subunit]	Siae	Ysg2
TRINITY_DN2375_c0_g2	0	0	0	0	0	P08770	#N/A	#N/A
TRINITY_DN23759_c0_g2	0	0	0	0	0	Q9VIK2	#N/A	#N/A
TRINITY_DN23790_c0_g1	0	0	0	0	0	P97259	Alpha-1,6-mannosylglycoprotein 6-beta-N-acetylglucosaminyltransferase A (EC 2.4.1.155) (Alpha-mannoside beta-1,6-N-acetylglucosaminyltransferase) (GlcNAc-T V) (GNT-V) (Mannoside acetylglucosaminyltransferase 5) (N-acetylglucosaminyl-transferase V) [Cleaved into: Secreted alpha-1,6-mannosylglycoprotein 6-beta-N-acetylglucosaminyltransferase A (Secreted beta-1,6-N-acetylglucosaminyltransferase V) (…	Mgat5
TRINITY_DN23805_c0_g1	0	0	0	0	0	P05555	Integrin alpha-M (CD11 antigen-like family member B) (CR-3 alpha chain) (Cell surface glycoprotein MAC-1 subunit alpha) (Leukocyte adhesion receptor MO1) (CD antigen CD11b)	Itgam
TRINITY_DN23809_c0_g1	0	0	0	0	0	P16108	#N/A	#N/A
TRINITY_DN23868_c0_g1	0	0	0	0	0	Q8R151	NFX1-type zinc finger-containing protein 1	Znfx1
TRINITY_DN23891_c1_g1	0	0	0	0	0	Q9NBX4	#N/A	#N/A
TRINITY_DN2391_c0_g1	0	0	0	0	0	Q8CGC7	Bifunctional glutamate/proline--tRNA ligase (Bifunctional aminoacyl-tRNA synthetase) [Includes: Glutamate--tRNA ligase (EC 6.1.1.17) (Glutamyl-tRNA synthetase) (GluRS); Proline--tRNA ligase (EC 6.1.1.15) (Prolyl-tRNA synthetase) (ProRS)]	Eprs1	Eprs	Qprs
TRINITY_DN240_c4_g1	0	0	0	0	0	Q29RU9	Peroxisomal sarcosine oxidase (PSO) (EC 1.5.3.1) (EC 1.5.3.7) (L-pipecolate oxidase) (L-pipecolic acid oxidase)	Pipox	Pso
TRINITY_DN2402_c0_g1	0	0	0	0	0	Q3ULD5	Methylcrotonoyl-CoA carboxylase beta chain, mitochondrial (MCCase subunit beta) (EC 6.4.1.4) (3-methylcrotonyl-CoA carboxylase 2) (3-methylcrotonyl-CoA carboxylase non-biotin-containing subunit) (3-methylcrotonyl-CoA:carbon dioxide ligase subunit beta)	Mccc2
TRINITY_DN24023_c0_g2	0	0	0	0	0	Q9H2C0	Gigaxonin	Gan
TRINITY_DN24029_c0_g1	0	0	0	0	0	Q2KIQ4	4-hydroxybenzoate polyprenyltransferase, mitochondrial (4-HB polyprenyltransferase) (EC 2.5.1.39) (Para-hydroxybenzoate--polyprenyltransferase) (PHB:PPT) (PHB:polyprenyltransferase)	Coq2
TRINITY_DN2404_c0_g1	0	0	0	0	0	Q7SYI5	Glycoprotein-N-acetylgalactosamine 3-beta-galactosyltransferase 1 (EC 2.4.1.122) (Core 1 O-glycan T-synthase) (T-syn) (Core 1 UDP-galactose:N-acetylgalactosamine-alpha-R beta 1,3-galactosyltransferase 1) (Core 1 beta1,3-galactosyltransferase 1) (C1GalT1) (Core 1 beta3-Gal-T1)	C1galt1	Plt1
TRINITY_DN2404_c1_g2	0	0	0	0	0	Q0VC84	Glycoprotein-N-acetylgalactosamine 3-beta-galactosyltransferase 1 (EC 2.4.1.122) (Core 1 O-glycan T-synthase) (T-syn) (Core 1 UDP-galactose:N-acetylgalactosamine-alpha-R beta 1,3-galactosyltransferase 1) (Core 1 beta1,3-galactosyltransferase 1) (C1GalT1) (Core 1 beta3-Gal-T1)	C1galt1	Plt1
TRINITY_DN24042_c1_g1	0	0	0	0	0	Q8R5C8	Zinc finger MYND domain-containing protein 11	Zmynd11
TRINITY_DN24047_c0_g1	0	0	0	0	0	A0A0R4I9Y1	E3 ubiquitin-protein ligase RNF213 (EC 2.3.2.27) (EC 3.6.4.-) (Mysterin) (RING finger protein 213) (RING-type E3 ubiquitin transferase RNF213)	Rnf213	Mystr
TRINITY_DN2406_c0_g1	0	0	0	0	0	Q5REY3	Thioredoxin-dependent peroxide reductase, mitochondrial (EC 1.11.1.24) (Antioxidant protein 1) (AOP-1) (PRX III) (Perioredoxin-3) (Protein MER5) (Thioredoxin-dependent peroxiredoxin 3)	Prdx3	Aop1	Mer5
TRINITY_DN2408_c0_g1	0	0	0	0	0	Q9WVM7	Aminoacyl tRNA synthase complex-interacting multifunctional protein 2 (Multisynthase complex auxiliary component p38) (Protein JTV-1)	Aimp2	Jtv1
TRINITY_DN2411_c0_g1	0	0	0	0	0	Q5ZJR8	Elongation of very long chain fatty acids protein 6 (EC 2.3.1.199) (3-keto acyl-CoA synthase Elovl6) (ELOVL fatty acid elongase 6) (ELOVL FA elongase 6) (Fatty acyl-CoA elongase) (Long chain fatty acid elongase) (Myelin-associated SUR4 protein) (Very long chain 3-ketoacyl-CoA synthase 6) (Very long chain 3-oxoacyl-CoA synthase 6)	Elovl6	Face	Lce	Masr
TRINITY_DN2412_c0_g1	0	0	0	0	0	Q6AY20	Cation-dependent mannose-6-phosphate receptor (CD Man-6-P receptor) (CD-MPR) (46 kDa mannose 6-phosphate receptor) (MPR 46)	M6pr	46mpr
TRINITY_DN24151_c0_g1	0	0	0	0	0	Q6P2B1	Transportin-3	Tnpo3
TRINITY_DN24171_c0_g2	0	0	0	0	0	Q05945	Heat shock cognate 71 kDa protein (Heat shock 70 kDa protein 8)	Hspa8	Hsc70	Hsc73
TRINITY_DN24172_c0_g1	0	0	0	0	0	A0A0R4I9Y1	E3 ubiquitin-protein ligase RNF213 (EC 2.3.2.27) (EC 3.6.4.-) (Mysterin) (RING finger protein 213) (RING-type E3 ubiquitin transferase RNF213)	Rnf213	Mystr
TRINITY_DN2418_c0_g1	0	0	0	0	0	Q5RGE4	Meiosis-expressed gene 1 protein (Protein expressed in male leptotene and zygotene spermatocytes 278) (MLZ-278)	Meig1	Meg1
TRINITY_DN24180_c0_g1	0	0	0	0	0	Q12866	Tyrosine-protein kinase Mer (EC 2.7.10.1) (Proto-oncogene c-Mer) (Receptor tyrosine kinase MerTK)	Mertk	Mer
TRINITY_DN24185_c0_g1	0	0	0	0	0	P79948	Beta-1,3-N-acetylglucosaminyltransferase radical fringe (EC 2.4.1.222) (O-fucosylpeptide 3-beta-N-acetylglucosaminyltransferase)	Rfng
TRINITY_DN24199_c0_g3	0	0	0	0	0	P05183	Cytochrome P450 3A41 (EC 1.14.14.1)	Cyp3a41a	Cyp3a41;	Cyp3a41b
TRINITY_DN242_c0_g1	0	0	0	0	0	Q80XC3	USP6 N-terminal-like protein	Usp6nl	Kiaa0019
TRINITY_DN2420_c0_g1	0	0	0	0	0	Q6GMI9	UDP-glucuronic acid decarboxylase 1 (EC 4.1.1.35) (UDP-glucuronate decarboxylase 1) (UGD) (UXS-1)	Uxs1
TRINITY_DN2422_c0_g1	0	0	0	0	0	P15056	Serine/threonine-protein kinase A-Raf (EC 2.7.11.1) (Proto-oncogene A-Raf)	Araf	A-raf	Araf1
TRINITY_DN24239_c0_g3	0	0	0	0	0	Q5RC69	Deoxycytidylate deaminase (EC 3.5.4.12) (dCMP deaminase)	Dctd
TRINITY_DN2425_c0_g1	0	0	0	0	0	Q7Z3V4	Ubiquitin-protein ligase E3B (EC 2.3.2.26) (HECT-type ubiquitin transferase E3B)	Ube3b
TRINITY_DN24258_c0_g3	0	0	0	0	0	Q9H5L6	#N/A	#N/A
TRINITY_DN24259_c0_g1	0	0	0	0	0	Q53G59	Kelch-like protein 12 (CUL3-interacting protein 1)	Klhl12	C3ip1
TRINITY_DN24264_c0_g1	0	0	0	0	0	Q80Z71	#N/A	#N/A
TRINITY_DN24284_c0_g1	0	0	0	0	0	Q8VYN9	#N/A	#N/A
TRINITY_DN24285_c0_g2	0	0	0	0	0	P21217	#N/A	#N/A
TRINITY_DN24345_c0_g1	0	0	0	0	0	P21956	Lactadherin (MFGM) (Milk fat globule-EGF factor 8) (MFG-E8) (SED1) (Sperm surface protein SP47) (MP47)	Mfge8
TRINITY_DN24351_c1_g2	0	0	0	0	0	Q95SX7	LINE-1 retrotransposable element ORF2 protein (ORF2p) (Long interspersed element-1) (L1) (Retrovirus-related Pol polyprotein LINE-1) [Includes: Reverse transcriptase (EC 2.7.7.49); Endonuclease (EC 3.1.21.-)]	Pol	Gm17492
TRINITY_DN24355_c0_g1	0	0	0	0	0	A2VDK6	Wiskott-Aldrich syndrome protein family member 2 (WASP family protein member 2) (Protein WAVE-2)	Wasf2	Wave2
TRINITY_DN2436_c0_g1	0	0	0	0	0	Q5XHB2	Dual specificity protein phosphatase 22 (EC 3.1.3.16) (EC 3.1.3.48) (Low molecular weight dual specificity phosphatase 2) (LMW-DSP2)	Dusp22
TRINITY_DN24364_c1_g1	0	0	0	0	0	Q2EMV9	Protein mono-ADP-ribosyltransferase PARP14 (EC 2.4.2.-) (ADP-ribosyltransferase diphtheria toxin-like 8) (ARTD8) (Collaborator of STAT6) (CoaSt6) (Poly [ADP-ribose] polymerase 14) (PARP-14)	Parp14	Kiaa1268
TRINITY_DN24364_c1_g2	0	0	0	0	0	Q2EMV9	Protein mono-ADP-ribosyltransferase PARP14 (EC 2.4.2.-) (ADP-ribosyltransferase diphtheria toxin-like 8) (ARTD8) (Collaborator of STAT6) (CoaSt6) (Poly [ADP-ribose] polymerase 14) (PARP-14)	Parp14	Kiaa1268
TRINITY_DN24399_c0_g1	0	0	0	0	0	Q58A42	#N/A	#N/A
TRINITY_DN2440_c0_g2	0	0	0	0	0	Q8BX90	#N/A	#N/A
TRINITY_DN24406_c0_g1	0	0	0	0	0	P27446	Neuronal proto-oncogene tyrosine-protein kinase Src (EC 2.7.10.2) (Proto-oncogene c-Src) (pp60c-src) (p60-Src)	Src
TRINITY_DN24430_c0_g1	0	0	0	0	0	Q07068	Tropomyosin alpha-1 chain (Alpha-tropomyosin) (Tropomyosin-1)	Tpm1	Tpm-1	Tpma
TRINITY_DN24440_c0_g1	0	0	0	0	0	Q9Z2E3	Serine/threonine-protein kinase/endoribonuclease IRE2 (Endoplasmic reticulum-to-nucleus signaling 2) (Inositol-requiring protein 2) (Ire1-beta) (IRE1b) (mIre1) [Includes: Serine/threonine-protein kinase (EC 2.7.11.1); Endoribonuclease (EC 3.1.26.-)]	Ern2	Ire2
TRINITY_DN24480_c0_g1	0	0	0	0	0	Q95SX7	LINE-1 retrotransposable element ORF2 protein (ORF2p) (Long interspersed element-1) (L1) (Retrovirus-related Pol polyprotein LINE-1) [Includes: Reverse transcriptase (EC 2.7.7.49); Endonuclease (EC 3.1.21.-)]	Pol	Gm17492
TRINITY_DN2449_c0_g1	0	0	0	0	0	Q61084	Mitogen-activated protein kinase kinase kinase 3 (EC 2.7.11.25) (MAPK/ERK kinase kinase 3) (MEK kinase 3) (MEKK 3)	Map3k3	Mekk3
TRINITY_DN2450_c0_g2	0	0	0	0	0	P10768	S-formylglutathione hydrolase (FGH) (EC 3.1.2.12) (Esterase 10) (Esterase D) (Sid 478)	Esd	Es10	Sid478
TRINITY_DN24517_c0_g1	0	0	0	0	0	Q8N539	Fibrinogen C domain-containing protein 1	Fibcd1
TRINITY_DN24526_c0_g3	0	0	0	0	0	Q9M2U3	#N/A	#N/A
TRINITY_DN2453_c0_g1	0	0	0	0	0	Q14997	Proteasome activator complex subunit 4 (Proteasome activator PA200) (Protein TEMO)	Psme4	Kiaa0077
TRINITY_DN24536_c0_g1	0	0	0	0	0	Q9NBX4	#N/A	#N/A
TRINITY_DN24539_c0_g1	0	0	0	0	0	Q02779	Mitogen-activated protein kinase kinase kinase 10 (EC 2.7.11.25)	Map3k10
TRINITY_DN24572_c0_g1	0	0	0	0	0	P11369	LINE-1 retrotransposable element ORF2 protein (ORF2p) (Long interspersed element-1) (L1) (Retrovirus-related Pol polyprotein LINE-1) [Includes: Reverse transcriptase (EC 2.7.7.49); Endonuclease (EC 3.1.21.-)]	Pol	Gm17492
TRINITY_DN24588_c0_g1	0	0	0	0	0	P15535	Beta-1,4-galactosyltransferase 1 (Beta-1,4-GalTase 1) (Beta4Gal-T1) (b4Gal-T1) (EC 2.4.1.-) (Beta-N-acetylglucosaminyl-glycolipid beta-1,4-galactosyltransferase) (Beta-N-acetylglucosaminylglycopeptide beta-1,4-galactosyltransferase) (EC 2.4.1.38) (Lactose synthase A protein) (EC 2.4.1.22) (N-acetyllactosamine synthase) (EC 2.4.1.90) (Nal synthase) (Neolactotriaosylceramide beta-1,4-galactosyltran…	B4galt1	Ggtb	Ggtb2
TRINITY_DN24588_c0_g2	0	0	0	0	0	P15535	Beta-1,4-galactosyltransferase 1 (Beta-1,4-GalTase 1) (Beta4Gal-T1) (b4Gal-T1) (EC 2.4.1.-) (Beta-N-acetylglucosaminyl-glycolipid beta-1,4-galactosyltransferase) (Beta-N-acetylglucosaminylglycopeptide beta-1,4-galactosyltransferase) (EC 2.4.1.38) (Lactose synthase A protein) (EC 2.4.1.22) (N-acetyllactosamine synthase) (EC 2.4.1.90) (Nal synthase) (Neolactotriaosylceramide beta-1,4-galactosyltran…	B4galt1	Ggtb	Ggtb2
TRINITY_DN24597_c0_g1	0	0	0	0	0	O14980	Exportin-1 (Exp1) (Chromosome region maintenance 1 protein homolog)	Xpo1	Crm1
TRINITY_DN24607_c0_g1	0	0	0	0	0	Q9UBI9	#N/A	#N/A
TRINITY_DN2463_c0_g1	0	0	0	0	0	Q8C2L6	Transmembrane protein 161B	Tmem161b
TRINITY_DN24631_c0_g2	0	0	0	0	0	O00370	#N/A	#N/A
TRINITY_DN24638_c0_g1	0	0	0	0	0	P08106	Heat shock-related 70 kDa protein 2 (Heat shock protein 70.2)	Hspa2	Hcp70.2	Hsp70-2
TRINITY_DN2466_c4_g1	0	0	0	0	0	Q556Q3	Serine/threonine-protein kinase 33 (EC 2.7.11.1)	Stk33
TRINITY_DN24717_c0_g1	0	0	0	0	0	Q01177	Plasminogen (EC 3.4.21.7) [Cleaved into: Plasmin heavy chain A; Activation peptide; Angiostatin; Plasmin heavy chain A, short form; Plasmin light chain B]	Plg
TRINITY_DN2472_c0_g1	0	0	0	0	0	Q460N5	Protein mono-ADP-ribosyltransferase PARP14 (EC 2.4.2.-) (ADP-ribosyltransferase diphtheria toxin-like 8) (ARTD8) (Collaborator of STAT6) (CoaSt6) (Poly [ADP-ribose] polymerase 14) (PARP-14)	Parp14	Kiaa1268
TRINITY_DN24724_c0_g1	0	0	0	0	0	O93233	Leucine-rich repeat-containing protein 4C (Netrin-G1 ligand) (NGL-1)	Lrrc4c	Ngl1
TRINITY_DN24736_c1_g1	0	0	0	0	0	Q7Z449	Cytochrome P450 2U1 (Long-chain fatty acid omega-monooxygenase) (EC 1.14.14.80)	Cyp2u1
TRINITY_DN24760_c0_g1	0	0	0	0	0	Q96PQ7	#N/A	#N/A
TRINITY_DN24761_c0_g1	0	0	0	0	0	P70627	N-acetylated-alpha-linked acidic dipeptidase 2 (EC 3.4.17.21) (Glutamate carboxypeptidase III) (GCPIII) (N-acetylaspartylglutamate peptidase II) (NAAG-peptidase II) (N-acetylated-alpha-linked acidic dipeptidase II) (NAALADase II)	Naalad2
TRINITY_DN24795_c0_g1	0	0	0	0	0	Q5R5U3	Zinc finger protein 431 (Zinc finger protein 932)	Znf431	Zfp431	Zfp932
TRINITY_DN24796_c1_g1	0	0	0	0	0	Q90660	Baculoviral IAP repeat-containing protein 3 (EC 2.3.2.27) (Cellular inhibitor of apoptosis 2) (C-IAP2) (Inhibitor of apoptosis protein 1) (mIAP1) (RING-type E3 ubiquitin transferase BIRC3)	Birc3
TRINITY_DN2480_c0_g1	0	0	0	0	0	Q7TNC4	Putative RNA-binding protein Luc7-like 2 (CGI-74 homolog)	Luc7l2
TRINITY_DN24803_c0_g5	0	0	0	0	0	Q8R422	CD109 antigen (GPI-anchored alpha-2 macroglobulin-related protein) (CD antigen CD109)	Cd109
TRINITY_DN24846_c0_g1	0	0	0	0	0	Q96DM1	#N/A	#N/A
TRINITY_DN24874_c0_g1	0	0	0	0	0	Q15386	Ubiquitin-protein ligase E3C (EC 2.3.2.26) (HECT-type ubiquitin transferase E3C)	Ube3c	Kiaa0010	Kiaa10
TRINITY_DN2489_c0_g1	0	0	0	0	0	A3KNS9	All-trans retinoic acid-induced differentiation factor (Apoptosis-related protein 3) (APR-3)	Atraid	2003-04-01
TRINITY_DN2489_c0_g2	0	0	0	0	0	Q5RBT0	Programmed cell death protein 5 (TF-1 cell apoptosis-related protein 19) (Protein TFAR19)	Pdcd5	Tfar19
TRINITY_DN24895_c0_g1	0	0	0	0	0	Q9S725	Medium-chain acyl-CoA ligase ACSF2, mitochondrial (EC 6.2.1.2)	Acsf2
TRINITY_DN249_c0_g1	0	0	0	0	0	P26007	Integrin alpha-6 (CD49 antigen-like family member F) (VLA-6) (CD antigen CD49f) [Cleaved into: Integrin alpha-6 heavy chain; Integrin alpha-6 light chain; Processed integrin alpha-6 (Alpha6p)]	Itga6
TRINITY_DN2493_c0_g1	0	0	0	0	0	Q6GNG8	PRKR-interacting protein 1 (Protein C114)	Prkrip1
TRINITY_DN2494_c0_g1	0	0	0	0	0	Q9Y2U8	Inner nuclear membrane protein Man1 (LEM domain-containing protein 3)	Lemd3	Man1
TRINITY_DN24978_c0_g1	0	0	0	0	0	Q9VYV5	Alpha-(1,6)-fucosyltransferase (Alpha1-6FucT) (EC 2.4.1.68) (Fucosyltransferase 8) (GDP-L-Fuc:N-acetyl-beta-D-glucosaminide alpha1,6-fucosyltransferase) (GDP-fucose--glycoprotein fucosyltransferase) (Glycoprotein 6-alpha-L-fucosyltransferase)	Fut8
TRINITY_DN24982_c0_g1	0	0	0	0	0	Q8NHH9	Atlastin-2 (EC 3.6.5.-) (ADP-ribosylation factor-like protein 6-interacting protein 2) (ARL-6-interacting protein 2) (Aip-2)	Atl2	Arl6ip2
TRINITY_DN24988_c0_g1	0	0	0	0	0	Q13018	#N/A	#N/A
TRINITY_DN24988_c2_g2	0	0	0	0	0	P34456	#N/A	#N/A
TRINITY_DN2500_c0_g1	0	0	0	0	0	Q6GR30	Zinc finger protein AEBP2 (Adipocyte enhancer-binding protein 2) (AE-binding protein 2)	Aebp2
TRINITY_DN2501_c0_g1	0	0	0	0	0	Q9DBV3	Probable ATP-dependent RNA helicase DHX34 (EC 3.6.4.13) (DEAH box protein 34)	Dhx34	Ddx34	Kiaa0134
TRINITY_DN25086_c0_g1	0	0	0	0	0	Q8VCV9	Sodium-dependent glucose transporter 1A (Major facilitator superfamily domain-containing protein 4B1)	Mfsd4b1	Naglt1a
TRINITY_DN2513_c1_g1	0	0	0	0	0	Q9UJX3	Anaphase-promoting complex subunit 7 (APC7) (Cyclosome subunit 7) (Prediabetic NOD sera-reactive autoantigen)	Anapc7	Apc7
TRINITY_DN2513_c2_g1	0	0	0	0	0	O54750	Cytochrome P450 2J6 (EC 1.14.14.1) (Arachidonic acid epoxygenase) (CYPIIJ6)	Cyp2j6
TRINITY_DN25197_c0_g1	0	0	0	0	0	P22105	Angiopoietin-2 (ANG-2)	Angpt2	Agpt2
TRINITY_DN25201_c0_g1	0	0	0	0	0	A0A0R4IBK5	E3 ubiquitin-protein ligase RNF213 (EC 2.3.2.27) (EC 3.6.4.-) (Mysterin) (RING finger protein 213) (RING-type E3 ubiquitin transferase RNF213)	Rnf213	Mystr
TRINITY_DN25234_c0_g1	0	0	0	0	0	Q5R410	Vesicle-fusing ATPase (EC 3.6.4.6) (N-ethylmaleimide-sensitive fusion protein) (NEM-sensitive fusion protein) (Suppressor of K(+) transport growth defect 2) (Protein SKD2) (Vesicular-fusion protein NSF)	Nsf	Skd2
TRINITY_DN2525_c0_g1	0	0	0	0	0	O43166	Signal-induced proliferation-associated 1-like protein 1 (SIPA1-like protein 1)	Sipa1l1	Kiaa0440
TRINITY_DN2529_c2_g1	0	0	0	0	0	P61963	DDB1- and CUL4-associated factor 7 (WD repeat-containing protein 68) (WD repeat-containing protein An11 homolog)	Dcaf7	Han11	Wdr68
TRINITY_DN25298_c0_g1	0	0	0	0	0	Q5T089	Radial spoke head 10 homolog B	Rsph10b	Rsph10b2
TRINITY_DN253_c0_g1	0	0	0	0	0	P48736	Phosphatidylinositol 4,5-bisphosphate 3-kinase catalytic subunit gamma isoform (PI3-kinase subunit gamma) (PI3K-gamma) (PI3Kgamma) (PtdIns-3-kinase subunit gamma) (EC 2.7.1.153) (Phosphatidylinositol 4,5-bisphosphate 3-kinase 110 kDa catalytic subunit gamma) (PtdIns-3-kinase subunit p110-gamma) (p110gamma) (Phosphoinositide-3-kinase catalytic gamma polypeptide) (Serine/threonine protein kinase PI…	Pik3cg	Pi3kg1
TRINITY_DN25300_c0_g1	0	0	0	0	0	Q96DM1	#N/A	#N/A
TRINITY_DN25300_c0_g2	0	0	0	0	0	Q96DM1	#N/A	#N/A
TRINITY_DN25324_c0_g1	0	0	0	0	0	P08760	GTP:AMP phosphotransferase AK3, mitochondrial (EC 2.7.4.10) (Adenylate kinase 3) (AK 3) (Adenylate kinase 3 alpha-like 1)	Ak3	Ak3l	Ak3l1	Akl3l
TRINITY_DN25332_c0_g3	0	0	0	0	0	Q96PQ7	Kelch-like protein 12 (CUL3-interacting protein 1)	Klhl12	C3ip1
TRINITY_DN2534_c0_g1	0	0	0	0	0	Q9JII1	Phosphatidylinositol polyphosphate 5-phosphatase type IV (72 kDa inositol polyphosphate 5-phosphatase) (Inositol polyphosphate-5-phosphatase E) (Phosphatidylinositol 4,5-bisphosphate 5-phosphatase) (EC 3.1.3.36) (Phosphatidylinositol-3,4,5-trisphosphate 5-phosphatase) (EC 3.1.3.86)	Inpp5e
TRINITY_DN25345_c0_g1	0	0	0	0	0	Q8IVH4	Methylmalonic aciduria type A homolog, mitochondrial (EC 3.6.-.-)	Mmaa
TRINITY_DN25365_c0_g1	0	0	0	0	0	P11438	Lysosome-associated membrane glycoprotein 1 (LAMP-1) (Lysosome-associated membrane protein 1) (120 kDa lysosomal membrane glycoprotein) (CD107 antigen-like family member A) (LGP-120) (Lysosomal membrane glycoprotein A) (LGP-A) (P2B) (CD antigen CD107a)	Lamp1	Lamp-1
TRINITY_DN25381_c0_g1	0	0	0	0	0	O75460	Mitogen-activated protein kinase kinase kinase kinase 2 (EC 2.7.11.1) (Germinal center kinase) (GCK) (MAPK/ERK kinase kinase kinase 2) (MEK kinase kinase 2) (MEKKK 2) (Rab8-interacting protein)	Map4k2	Rab8ip
TRINITY_DN25389_c2_g2	0	0	0	0	0	Q5U374	Kelch-like protein 12 (CUL3-interacting protein 1)	Klhl12	C3ip1
TRINITY_DN2539_c1_g1	0	0	0	0	0	Q95SX7	LINE-1 retrotransposable element ORF2 protein (ORF2p) (Long interspersed element-1) (L1) (Retrovirus-related Pol polyprotein LINE-1) [Includes: Reverse transcriptase (EC 2.7.7.49); Endonuclease (EC 3.1.21.-)]	Pol	Gm17492
TRINITY_DN2539_c1_g2	0	0	0	0	0	P05452	Tetranectin (TN) (C-type lectin domain family 3 member B) (Plasminogen kringle 4-binding protein)	Clec3b	Tna
TRINITY_DN2542_c4_g1	0	0	0	0	0	Q96B97	SH3 domain-containing kinase-binding protein 1 (Regulator of ubiquitous kinase) (Ruk) (SH3-containing, expressed in tumorigenic astrocytes)	Sh3kbp1	Ruk	Seta
TRINITY_DN25427_c0_g1	0	0	0	0	0	Q64419	Acylcarnitine hydrolase (ACH M1) (EC 3.1.1.28) (Carboxylesterase 2) (CES 2) (Carboxylic ester hydrolase) (EC 3.1.1.-) (Peroxisome proliferator-inducible acylcarnitine hydrolase)	Ces2c	Ces2
TRINITY_DN2543_c0_g1	0	0	0	0	0	Q9H2D1	Mitochondrial folate transporter/carrier (Solute carrier family 25 member 32)	Slc25a32	Mftc
TRINITY_DN25432_c0_g1	0	0	0	0	0	Q8BZM0	Kelch-like protein 12 (CUL3-interacting protein 1)	Klhl12	C3ip1
TRINITY_DN2550_c0_g1	0	0	0	0	0	A1L224	Cyclic AMP-responsive element-binding protein 3-like protein 1 (cAMP-responsive element-binding protein 3-like protein 1) (Old astrocyte specifically-induced substance) (OASIS) [Cleaved into: Processed cyclic AMP-responsive element-binding protein 3-like protein 1 (Oasis N-terminal fragment) (OA-N)]	Creb3l1	Oasis
TRINITY_DN25503_c0_g1	0	0	0	0	0	Q63HN8	E3 ubiquitin-protein ligase RNF213 (EC 2.3.2.27) (EC 3.6.4.-) (Mysterin) (RING finger protein 213) (RING-type E3 ubiquitin transferase RNF213)	Rnf213	Mystr
TRINITY_DN25503_c1_g1	0	0	0	0	0	A0A0R4I9Y1	E3 ubiquitin-protein ligase RNF213 (EC 2.3.2.27) (EC 3.6.4.-) (Mysterin) (RING finger protein 213) (RING-type E3 ubiquitin transferase RNF213)	Rnf213	Mystr
TRINITY_DN2553_c0_g1	0	0	0	0	0	Q75V66	Anoctamin-5 (Gnathodiaphyseal dysplasia 1 protein homolog) (Transmembrane protein 16E)	Ano5	Gdd1	Tmem16e
TRINITY_DN2553_c0_g2	0	0	0	0	0	H3BS89	Transmembrane protein 178A	Tmem178a	Tmem178
TRINITY_DN2555_c1_g1	0	0	0	0	0	Q8VCE1	DnaJ homolog subfamily C member 28	Dnajc28	ORF28
TRINITY_DN25558_c0_g2	0	0	0	0	0	Q9P0U4	#N/A	#N/A
TRINITY_DN25590_c0_g1	0	0	0	0	0	A0A0R4IBK5	E3 ubiquitin-protein ligase RNF213 (EC 2.3.2.27) (EC 3.6.4.-) (Mysterin) (RING finger protein 213) (RING-type E3 ubiquitin transferase RNF213)	Rnf213	Mystr
TRINITY_DN25591_c0_g1	0	0	0	0	0	O23320	Calmodulin-3	Calm3	Cam3	Camc
TRINITY_DN256_c0_g1	0	0	0	0	0	Q28623	Sarcolemmal membrane-associated protein (Sarcolemmal-associated protein)	Slmap	Kiaa1601	Slap
TRINITY_DN25606_c0_g1	0	0	0	0	0	Q9JJ09	Sodium-dependent phosphate transport protein 2B (Sodium-phosphate transport protein 2B) (Na(+)-dependent phosphate cotransporter 2B) (Sodium/phosphate cotransporter 2B) (Na(+)/Pi cotransporter 2B) (NaPi-2b) (Solute carrier family 34 member 2)	Slc34a2	Npt2b
TRINITY_DN2563_c0_g1	0	0	0	0	0	A5YKK6	CCR4-NOT transcription complex subunit 1 (CCR4-associated factor 1)	Cnot1	Kiaa1007
TRINITY_DN2564_c0_g1	0	0	0	0	0	Q63ZR0	Tumor suppressor candidate 3 (Dolichyl-diphosphooligosaccharide--protein glycosyltransferase subunit TUSC3) (Oligosaccharyl transferase subunit TUSC3) (Magnesium uptake/transporter TUSC3) (Protein N33)	Tusc3	N33
TRINITY_DN25655_c0_g1	0	0	0	0	0	Q6UFZ9	14-3-3 protein gamma [Cleaved into: 14-3-3 protein gamma, N-terminally processed]	Ywhag
TRINITY_DN2566_c0_g1	0	0	0	0	0	Q5VWG9	Transcription initiation factor TFIID subunit 3 (140 kDa TATA box-binding protein-associated factor) (TBP-associated factor 3) (Transcription initiation factor TFIID 140 kDa subunit) (TAF(II)140) (TAF140) (TAFII-140) (TAFII140)	Taf3
TRINITY_DN2567_c0_g1	0	0	0	0	0	P0C6B8	Sushi, von Willebrand factor type A, EGF and pentraxin domain-containing protein 1 (Polydom)	Svep1
TRINITY_DN25673_c0_g1	0	0	0	0	0	P48039	Melatonin receptor type 1A (Mel-1A-R) (Mel1a receptor)	Mtnr1a
TRINITY_DN256730_c0_g1	0	0	0	0	0	P28575	Actin-binding protein IPP (Intracisternal A particle-promoted polypeptide) (IPP) (Murine IAP-promoted placenta-expressed protein) (Protein MIPP)	Ipp	Mipp
TRINITY_DN25689_c0_g2	0	0	0	0	0	Q6YHK3	CD109 antigen (GPI-anchored alpha-2 macroglobulin-related protein) (CD antigen CD109)	Cd109
TRINITY_DN2569_c0_g1	0	0	0	0	0	Q16832	Discoidin domain-containing receptor 2 (Discoidin domain receptor 2) (EC 2.7.10.1) (CD167 antigen-like family member B) (Neurotrophic tyrosine kinase, receptor-related 3) (Receptor protein-tyrosine kinase TKT) (Tyrosine-protein kinase TYRO10) (CD antigen CD167b)	Ddr2	Ntrkr3	Tkt	Tyro10
TRINITY_DN257_c0_g1	0	0	0	0	0	P92177	14-3-3 protein epsilon (14-3-3E)	Ywhae
TRINITY_DN2570_c0_g1	0	0	0	0	0	Q78S06	Protein SYS1 homolog	Sys1
TRINITY_DN25702_c0_g2	0	0	0	0	0	Q710D3	#N/A	#N/A
TRINITY_DN2572_c0_g1	0	0	0	0	0	Q9P2D1	Chromodomain-helicase-DNA-binding protein 7 (CHD-7) (EC 3.6.4.12) (ATP-dependent helicase CHD7)	Chd7
TRINITY_DN2573_c0_g1	0	0	0	0	0	Q9CZD3	Glycine--tRNA ligase (EC 6.1.1.14) (Diadenosine tetraphosphate synthetase) (Ap4A synthetase) (EC 2.7.7.-) (Glycyl-tRNA synthetase 1) (GlyRS)	Gars1	Gars
TRINITY_DN2575_c0_g2	0	0	0	0	0	Q7Z407	CUB and sushi domain-containing protein 3 (CUB and sushi multiple domains protein 3)	Csmd3	Kiaa1894
TRINITY_DN25752_c0_g1	0	0	0	0	0	Q9UKG1	#N/A	#N/A
TRINITY_DN2576_c0_g1	0	0	0	0	0	Q6TCG8	Progestin and adipoQ receptor family member 3 (Progestin and adipoQ receptor family member III) (Raf kinase trapping to Golgi) (RKTG)	Paqr3
TRINITY_DN25760_c0_g1	0	0	0	0	0	E1BD59	#N/A	#N/A
TRINITY_DN2578_c0_g1	0	0	0	0	0	D4ABL6	Multiple C2 and transmembrane domain-containing protein 1	Mctp1
TRINITY_DN25792_c0_g1	0	0	0	0	0	Q9UKX5	Integrin alpha-2 (CD49 antigen-like family member B) (Collagen receptor) (Platelet membrane glycoprotein Ia) (GPIa) (VLA-2 subunit alpha) (CD antigen CD49b)	Itga2
TRINITY_DN2582_c0_g1	0	0	0	0	0	D2YVK5	C-type lectin domain family 4 member K (Langerin) (CD antigen CD207)	Cd207	Clec4k
TRINITY_DN25825_c1_g1	0	0	0	0	0	Q9ERU9	#N/A	#N/A
TRINITY_DN2587_c0_g1	0	0	0	0	0	Q8BH70	F-box/LRR-repeat protein 4 (F-box and leucine-rich repeat protein 4)	Fbxl4
TRINITY_DN2589_c0_g1	0	0	0	0	0	Q53FA7	Quinone oxidoreductase (EC 1.6.5.5) (NADPH:quinone reductase) (Zeta-crystallin)	Cryz
TRINITY_DN25902_c0_g1	0	0	0	0	0	F1QLY4	Nuclear receptor ROR-beta (Nuclear receptor RZR-beta) (Nuclear receptor subfamily 1 group F member 2) (Retinoid-related orphan receptor-beta)	Rorb	Nr1f2
TRINITY_DN25920_c0_g1	0	0	0	0	0	Q9R0Y1	Acid-sensing ion channel 5 (ASIC5) (Amiloride-sensitive cation channel 5) (Brain-liver-intestine amiloride-sensitive Na(+) channel) (BLINaC)	Asic5	Accn5	Blinac
TRINITY_DN2593_c0_g1	0	0	0	0	0	A4IFH4	DNA replication complex GINS protein PSF1 (GINS complex subunit 1)	Gins1	Psf1
TRINITY_DN2595_c0_g1	0	0	0	0	0	Q5U374	#N/A	#N/A
TRINITY_DN25958_c0_g1	0	0	0	0	0	Q92052	Gap junction alpha-10 protein (Connexin-57) (Cx57)	Gja10
TRINITY_DN25977_c0_g1	0	0	0	0	0	P56654	Cytochrome P450 2C37 (EC 1.14.14.1) (CYPIIC37)	Cyp2c37
TRINITY_DN2599_c0_g1	0	0	0	0	0	Q5R5H4	Presenilins-associated rhomboid-like protein, mitochondrial (EC 3.4.21.105) (Mitochondrial intramembrane-cleaving protease PARL) [Cleaved into: P-beta (Pbeta)]	Parl	Psarl
TRINITY_DN25991_c0_g1	0	0	0	0	0	P21129	P3 protein (Solute carrier family 10 member 3)	Slc10a3	P3
TRINITY_DN26_c0_g1	0	0	0	0	0	Q70AG8	Alpha-(1,3)-fucosyltransferase 11 (EC 2.4.1.-) (Fucosyltransferase XI) (Fuc-TXI) (FucT-XI) (Galactoside 3-L-fucosyltransferase 11) (Fucosyltransferase 11)	Fut11
TRINITY_DN2600_c0_g1	0	0	0	0	0	Q96P11	28S rRNA (cytosine-C(5))-methyltransferase (EC 2.1.1.-) (NOL1/NOP2/Sun domain family member 5) (Williams-Beuren syndrome chromosomal region 20A protein homolog)	Nsun5	Wbscr20a
TRINITY_DN26059_c0_g1	0	0	0	0	0	Q6ZN57	Zinc finger protein 2 (Zfp-2) (Protein mKR2)	Zfp2	Fnp-2	Mkr2	Zfp-2
TRINITY_DN26060_c0_g1	0	0	0	0	0	Q7Z2Q7	Leucine-rich repeat transmembrane neuronal protein 1	Lrrtm1
TRINITY_DN260681_c0_g1	0	0	0	0	0	P70194	C-type lectin domain family 4 member F (C-type lectin superfamily member 13) (C-type lectin 13) (Kupffer cell receptor)	Clec4f	Clecsf13	Kclr
TRINITY_DN2607_c0_g1	0	0	0	0	0	Q9NWV4	CXXC motif containing zinc binding protein (UPF0587 protein C1orf123 homolog)	Czib
TRINITY_DN261_c1_g1	0	0	0	0	0	Q8R2H4	Kelch-like protein 12 (CUL3-interacting protein 1)	Klhl12	C3ip1
TRINITY_DN2611_c0_g1	0	0	0	0	0	Q9S725	Medium-chain acyl-CoA ligase ACSF2, mitochondrial (EC 6.2.1.2)	Acsf2
TRINITY_DN2613_c0_g1	0	0	0	0	0	Q5BKL8	E3 ubiquitin-protein ligase XIAP (EC 2.3.2.27) (Baculoviral IAP repeat-containing protein 4) (IAP homolog A) (Inhibitor of apoptosis protein 3) (IAP-3) (mIAP-3) (mIAP3) (RING-type E3 ubiquitin transferase XIAP) (X-linked inhibitor of apoptosis protein) (X-linked IAP)	Xiap	Aipa	Api3	Birc4	Miha
TRINITY_DN2615_c0_g1	0	0	0	0	0	Q4G0F5	Vacuolar protein sorting-associated protein 26B (Vesicle protein sorting 26B)	Vps26b
TRINITY_DN2619_c0_g2	0	0	0	0	0	P51830	Adenylate cyclase type 9 (EC 4.6.1.1) (ATP pyrophosphate-lyase 9) (Adenylate cyclase type IX) (Adenylyl cyclase 9) (AC9) (Adenylyl cyclase type 10) (ACTP10)	Adcy9
TRINITY_DN2620_c0_g1	0	0	0	0	0	P20715	3-hydroxy-3-methylglutaryl-coenzyme A reductase (HMG-CoA reductase) (EC 1.1.1.34)	Hmgcr
TRINITY_DN262007_c0_g1	0	0	0	0	0	Q9Z336	Dynein light chain Tctex-type 1 (Activator of G-protein signaling 2) (AGS2) (T-complex testis-specific protein 1) (TCTEX-1)	Dynlt1	Tctel1	Tctex-1	Tctex1
TRINITY_DN26204_c0_g1	0	0	0	0	0	Q5EA92	ARL14 effector protein (ARF7 effector protein)	Arl14ep	Arf7ep
TRINITY_DN26207_c0_g1	0	0	0	0	0	Q91XE8	Transmembrane protein 205	Tmem205
TRINITY_DN2621_c1_g2	0	0	0	0	0	Q95SX7	#N/A	#N/A
TRINITY_DN2621_c1_g3	0	0	0	0	0	Q5U374	Kelch-like protein 12 (CUL3-interacting protein 1)	Klhl12	C3ip1
TRINITY_DN26237_c0_g1	0	0	0	0	0	Q7M3K2	#N/A	#N/A
TRINITY_DN26256_c0_g1	0	0	0	0	0	A8WFT6	Hydroxylysine kinase (5-hydroxy-L-lysine kinase) (EC 2.7.1.81) (Aminoglycoside phosphotransferase domain-containing protein 1)	Hykk	Agphd1
TRINITY_DN26275_c0_g1	0	0	0	0	0	Q5U538	Putative nuclease HARBI1 (EC 3.1.-.-) (Harbinger transposase-derived nuclease)	Harbi1
TRINITY_DN2628_c0_g1	0	0	0	0	0	Q5F356	Phosphatidylinositol 5-phosphate 4-kinase type-2 alpha (EC 2.7.1.149) (1-phosphatidylinositol 5-phosphate 4-kinase 2-alpha) (Diphosphoinositide kinase 2-alpha) (Phosphatidylinositol 5-phosphate 4-kinase type II alpha) (PI(5)P 4-kinase type II alpha) (PIP4KII-alpha) (PtdIns(5)P-4-kinase isoform 2-alpha)	Pip4k2a	Pip5k2a
TRINITY_DN26297_c0_g1	0	0	0	0	0	O60242	Adhesion G protein-coupled receptor B3 (Brain-specific angiogenesis inhibitor 3)	Adgrb3	Bai3
TRINITY_DN26305_c0_g1	0	0	0	0	0	Q8CIM1	Leucine-rich repeat-containing protein 45	Lrrc45
TRINITY_DN2631_c0_g1	0	0	0	0	0	O43734	#N/A	#N/A
TRINITY_DN2633_c0_g1	0	0	0	0	0	Q8K1J6	CCA tRNA nucleotidyltransferase 1, mitochondrial (EC 2.7.7.72) (mitochondrial tRNA nucleotidyl transferase, CCA-adding) (mt CCA-adding enzyme) (mt tRNA CCA-diphosphorylase) (mt tRNA CCA-pyrophosphorylase) (mt tRNA adenylyltransferase)	Trnt1
TRINITY_DN2634_c0_g1	0	0	0	0	0	Q5T1M5	FK506-binding protein 15 (FKBP-15) (133 kDa FK506-binding protein) (133 kDa FKBP) (FKBP-133) (WASP and FKBP-like) (WAFL)	Fkbp15	Fkbp133	Kiaa0674
TRINITY_DN26347_c0_g1	0	0	0	0	0	Q6ZPT1	Kelch-like protein 9	Klhl9	Kiaa1354
TRINITY_DN26353_c0_g2	0	0	0	0	0	P21956	Lactadherin (MFGM) (Milk fat globule-EGF factor 8) (MFG-E8) (SED1) (Sperm surface protein SP47) (MP47)	Mfge8
TRINITY_DN26375_c0_g1	0	0	0	0	0	P31646	Sodium- and chloride-dependent GABA transporter 2 (GAT-2) (Sodium- and chloride-dependent GABA transporter 3) (GAT-3) (Solute carrier family 6 member 13)	Slc6a13	Gabt2	Gabt3	Gat-3	Gat2	Gat3
TRINITY_DN26405_c0_g1	0	0	0	0	0	P85838	#N/A	#N/A
TRINITY_DN26406_c0_g1	0	0	0	0	0	Q28031	Lysophosphatidic acid receptor 1 (LPA receptor 1) (LPA-1) (Lysophosphatidic acid receptor Edg-2) (Rec1.3) (VZG-1)	Lpar1	Edg2	Gpcr26	Lpa1	Vzg1
TRINITY_DN26422_c0_g1	0	0	0	0	0	Q3UFS0	Protein zyg-11 homolog B	Zyg11b	Kiaa1730
TRINITY_DN2643_c0_g1	0	0	0	0	0	Q08623	Pseudouridine-5'-phosphatase (EC 3.1.3.96) (Haloacid dehalogenase-like hydrolase domain-containing protein 1) (Haloacid dehalogenase-like hydrolase domain-containing protein 1A) (Pseudouridine-5'-monophosphatase) (5'-PsiMPase)	Pudp	Hdhd1	Hdhd1a
TRINITY_DN2648_c0_g1	0	0	0	0	0	Q96S82	Ubiquitin-like protein 7	Ubl7
TRINITY_DN26486_c0_g1	0	0	0	0	0	Q9Y2C3	Beta-1,3-galactosyltransferase 5 (Beta-1,3-GalTase 5) (Beta3Gal-T5) (Beta3GalT5) (b3Gal-T5) (EC 2.4.1.-) (Beta-3-Gx-T5) (Stage-specific embryonic antigen 3 synthase) (SSEA-3 synthase) (UDP-Gal:beta-GlcNAc beta-1,3-galactosyltransferase 5) (UDP-galactose:beta-N-acetylglucosamine beta-1,3-galactosyltransferase 5)	B3galt5	B3gt5
TRINITY_DN2649_c0_g1	0	0	0	0	0	Q5R4C3	Transmembrane protein 50B	Tmem50b
TRINITY_DN2652_c0_g1	0	0	0	0	0	D3ZIE4	FYN-binding protein 1 (Adhesion and degranulation promoting adaptor protein) (ADAP) (FYB-120/130) (p120/p130) (FYN-T-binding protein) (SLAP-130) (SLP-76-associated phosphoprotein)	Fyb1	Fyb
TRINITY_DN2655_c2_g1	0	0	0	0	0	O70537	#N/A	#N/A
TRINITY_DN26577_c0_g1	0	0	0	0	0	Q0V8L2	Glutathione hydrolase 7 (EC 3.4.19.13) (Gamma-glutamyltransferase 7) (GGT 7) (EC 2.3.2.2) (Gamma-glutamyltransferase-like 3) (Gamma-glutamyltranspeptidase 7) [Cleaved into: Glutathione hydrolase 7 heavy chain; Glutathione hydrolase 7 light chain]	Ggt7	Ggtl3
TRINITY_DN2658_c0_g1	0	0	0	0	0	Q6PF21	Methionine--tRNA ligase, cytoplasmic (EC 6.1.1.10) (Methionyl-tRNA synthetase) (MetRS)	Mars1	Mars
TRINITY_DN26585_c0_g3	0	0	0	0	0	A2AJ76	Hemicentin-2	Hmcn2
TRINITY_DN266_c0_g1	0	0	0	0	0	Q28FE0	Serine/threonine-protein phosphatase CPPED1 (EC 3.1.3.16) (Calcineurin-like phosphoesterase domain-containing protein 1)	Cpped1	Cstp1
TRINITY_DN26603_c0_g1	0	0	0	0	0	Q7ZYD9	Ankyrin repeat domain-containing protein 13C	Ankrd13c
TRINITY_DN26609_c0_g1	0	0	0	0	0	Q4R6I5	Clathrin heavy chain linker domain-containing protein 1	Clhc1
TRINITY_DN26632_c0_g1	0	0	0	0	0	Q6GMI7	Enolase-phosphatase E1 (EC 3.1.3.77) (2,3-diketo-5-methylthio-1-phosphopentane phosphatase) (MASA homolog)	Enoph1	Masa
TRINITY_DN26659_c0_g2	0	0	0	0	0	P10394	#N/A	#N/A
TRINITY_DN2667_c0_g2	0	0	0	0	0	Q9P2K3	REST corepressor 2 (M-CoREST)	Rcor2
TRINITY_DN26671_c0_g1	0	0	0	0	0	Q9VUL9	Alpha-(1,3)-fucosyltransferase 7 (EC 2.4.1.-) (Fucosyltransferase 7) (Fucosyltransferase VII) (Fuc-TVII) (FucT-VII) (Galactoside 3-L-fucosyltransferase)	Fut7
TRINITY_DN26672_c0_g2	0	0	0	0	0	D2YVH7	#N/A	#N/A
TRINITY_DN2670_c0_g1	0	0	0	0	0	Q9BUJ2	Heterogeneous nuclear ribonucleoprotein U-like protein 1	Hnrnpul1	Hnrpul1
TRINITY_DN26703_c0_g1	0	0	0	0	0	O15439	Multidrug resistance-associated protein 5 (ATP-binding cassette sub-family C member 5) (Multi-specific organic anion transporter C) (MOAT-C) (SMRP)	Abcc5	Abcc5a	Mrp5
TRINITY_DN2672_c0_g1	0	0	0	0	0	Q9VU84	Drebrin-like protein (Actin-binding protein 1) (SH3 domain-containing protein 7)	Dbnl	Abp1	Sh3p7
TRINITY_DN26784_c0_g1	0	0	0	0	0	Q9TXQ1	Protein TANC1 (Tetratricopeptide repeat, ankyrin repeat and coiled-coil domain-containing protein 1)	Tanc1
TRINITY_DN2682_c0_g1	0	0	0	0	0	P58390	Small conductance calcium-activated potassium channel protein 2 (SK2) (SKCa 2) (SKCa2) (KCa2.2)	Kcnn2	Sk2
TRINITY_DN26837_c0_g1	0	0	0	0	0	Q92752	Tenascin-R (TN-R) (Janusin) (Neural recognition molecule J1-160/180) (Restrictin)	Tnr
TRINITY_DN26837_c0_g2	0	0	0	0	0	Q92752	Tenascin-R (TN-R) (Janusin) (Neural recognition molecule J1-160/180) (Restrictin)	Tnr
TRINITY_DN2684_c0_g1	0	0	0	0	0	O35569	Pro-neuregulin-2, membrane-bound isoform (Pro-NRG2) [Cleaved into: Neuregulin-2 (NRG-2) (Divergent of neuregulin 1) (DON-1)]	Nrg2
TRINITY_DN26856_c0_g1	0	0	0	0	0	Q7Z5P4	Estradiol 17-beta-dehydrogenase 11 (EC 1.1.1.62) (17-beta-hydroxysteroid dehydrogenase 11) (17-beta-HSD 11) (17bHSD11) (17betaHSD11) (17-beta-hydroxysteroid dehydrogenase XI) (17-beta-HSD XI) (17betaHSDXI) (Dehydrogenase/reductase SDR family member 8)	Hsd17b11	Dhrs8	Pan1b
TRINITY_DN26870_c0_g1	0	0	0	0	0	P56179	Homeobox protein DLX-6	Dlx6
TRINITY_DN26881_c0_g1	0	0	0	0	0	Q6ZNA1	Zinc finger protein 90 (Zfp-90) (Zinc finger protein NK10)	Zfp90	Nk10
TRINITY_DN2689_c0_g1	0	0	0	0	0	B4F6U4	PR domain zinc finger protein 10 (EC 2.1.1.-) (PR domain-containing protein 10) (Tristanin)	Prdm10	Gm1112	Tris
TRINITY_DN26939_c0_g1	0	0	0	0	0	Q5RA96	GMP synthase [glutamine-hydrolyzing] (EC 6.3.5.2) (GMP synthetase) (Glutamine amidotransferase)	Gmps
TRINITY_DN26942_c0_g1	0	0	0	0	0	Q8IZU2	#N/A	#N/A
TRINITY_DN26947_c0_g1	0	0	0	0	0	Q3V080	Zinc finger protein 583	Znf583	Zfp583
TRINITY_DN26955_c0_g1	0	0	0	0	0	P28575	#N/A	#N/A
TRINITY_DN2698_c0_g1	0	0	0	0	0	Q5RE11	Tetraspanin-3 (Tspan-3) (OSP-associated protein 1) (OAP-1) (Tetraspanin TM4-A) (Transmembrane 4 superfamily member 8)	Tspan3	Tm4sf8
TRINITY_DN26985_c0_g1	0	0	0	0	0	Q5FW46	Protein FAM214A	Fam214a	Kiaa1370
TRINITY_DN2699_c0_g1	0	0	0	0	0	Q6UB99	Ankyrin repeat domain-containing protein 11	Ankrd11
TRINITY_DN27_c0_g2	0	0	0	0	0	Q5T7W7	Thiosulfate sulfurtransferase/rhodanese-like domain-containing protein 2	Tstd2
TRINITY_DN27_c2_g1	0	0	0	0	0	A6NK53	Zinc finger protein 271 (Zinc finger protein 35) (Zfp-35)	Znf271	Zfp-35	Zfp35
TRINITY_DN27003_c0_g1	0	0	0	0	0	Q8K4H1	Kynurenine formamidase (KFA) (KFase) (EC 3.5.1.9) (Arylformamidase) (N-formylkynurenine formamidase) (FKF)	Afmid
TRINITY_DN27045_c0_g1	0	0	0	0	0	P10984	Actin, cytoplasmic 1 (Beta-actin) [Cleaved into: Actin, cytoplasmic 1, N-terminally processed]	Actb
TRINITY_DN27062_c0_g1	0	0	0	0	0	B4QLQ2	Kelch-like protein 20 (Kelch-like ECT2-interacting protein)	Klhl20	Kiaa4210	Kleip
TRINITY_DN27176_c0_g2	0	0	0	0	0	Q03279	LINE-1 retrotransposable element ORF2 protein (ORF2p) (Long interspersed element-1) (L1) (Retrovirus-related Pol polyprotein LINE-1) [Includes: Reverse transcriptase (EC 2.7.7.49); Endonuclease (EC 3.1.21.-)]	Pol	Gm17492
TRINITY_DN27198_c0_g2	0	0	0	0	0	Q6DD88	Atlastin-3 (EC 3.6.5.-)	Atl3
TRINITY_DN27219_c0_g2	0	0	0	0	0	P04323	#N/A	#N/A
TRINITY_DN2722_c0_g1	0	0	0	0	0	P08001	Chymotrypsinogen B (EC 3.4.21.1) [Cleaved into: Chymotrypsin B chain A; Chymotrypsin B chain B; Chymotrypsin B chain C]	Ctrb1
TRINITY_DN2724_c0_g1	0	0	0	0	0	Q15024	Exosome complex exonuclease RRP42 (Exosome component 7) (Ribosomal RNA-processing protein 42)	Exosc7	Rrp42
TRINITY_DN27257_c0_g1	0	0	0	0	0	Q640A2	Heterogeneous nuclear ribonucleoprotein D-like (hnRNP D-like) (hnRNP DL) (JKT41-binding protein)	Hnrnpdl	Hnrpdl	Jktbp
TRINITY_DN273_c0_g1	0	0	0	0	0	P14231	Sodium/potassium-transporting ATPase subunit beta-2 (Adhesion molecule in glia) (AMOG) (Sodium/potassium-dependent ATPase subunit beta-2)	Atp1b2
TRINITY_DN27302_c0_g1	0	0	0	0	0	Q9QXA6	b(0,+)-type amino acid transporter 1 (b(0,+)AT1) (Glycoprotein-associated amino acid transporter b0,+AT1) (Solute carrier family 7 member 9)	Slc7a9	Bat1
TRINITY_DN27343_c0_g1	0	0	0	0	0	Q6JEL3	Kelch-like protein 10	Klhl10
TRINITY_DN27343_c0_g2	0	0	0	0	0	Q9CR40	Kelch-like protein 28 (BTB/POZ domain-containing protein 5)	Klhl28	Btbd5
TRINITY_DN27345_c2_g1	0	0	0	0	0	Q9EP75	Leukotriene-B4 omega-hydroxylase 3 (EC 1.14.14.94) (Cyp4f-14) (Cytochrome P450 4F14) (Cytochrome P450-LTB-omega) (Leukotriene-B4 20-monooxygenase 3)	Cyp4f14
TRINITY_DN27349_c0_g1	0	0	0	0	0	Q8K1F9	Lactase-like protein (Klotho/lactase-phlorizin hydrolase-related protein)	Lctl	Klph
TRINITY_DN2739_c0_g1	0	0	0	0	0	Q5E9N5	Caseinolytic peptidase B protein homolog (EC 3.6.1.-) (Suppressor of potassium transport defect 3)	Clpb	Skd3
TRINITY_DN2741_c0_g1	0	0	0	0	0	Q3KPN2	Pre-rRNA-processing protein TSR2 homolog	Tsr2
TRINITY_DN27412_c0_g1	0	0	0	0	0	P17927	Sushi, von Willebrand factor type A, EGF and pentraxin domain-containing protein 1 (Polydom)	Svep1
TRINITY_DN27413_c0_g2	0	0	0	0	0	P14381	#N/A	#N/A
TRINITY_DN2743_c0_g1	0	0	0	0	0	Q8NEF3	Coiled-coil domain-containing protein 112	Ccdc112
TRINITY_DN27441_c0_g1	0	0	0	0	0	Q8IYJ3	Synaptotagmin-like protein 1 (Exophilin-7)	Sytl1	Slp1
TRINITY_DN27463_c0_g1	0	0	0	0	0	P01027	Complement C3 (HSE-MSF) [Cleaved into: Complement C3 beta chain; C3-beta-c (C3bc); Complement C3 alpha chain; C3a anaphylatoxin; Acylation stimulating protein (ASP) (C3adesArg); Complement C3b alpha' chain; Complement C3c alpha' chain fragment 1; Complement C3dg fragment; Complement C3g fragment; Complement C3d fragment; Complement C3f fragment; Complement C3c alpha' chain fragment 2]	C3
TRINITY_DN27517_c0_g1	0	0	0	0	0	Q921M7	CYFIP-related Rac1 interactor B (Protein FAM49B)	Cyrib	Cyri	Fam49b
TRINITY_DN27541_c0_g1	0	0	0	0	0	Q9NQZ5	StAR-related lipid transfer protein 7, mitochondrial (START domain-containing protein 7) (StARD7)	Stard7
TRINITY_DN27543_c0_g1	0	0	0	0	0	Q9C005	Protein dpy-30 homolog (Dpy-30-like protein) (Dpy-30L)	Dpy30
TRINITY_DN27619_c0_g1	0	0	0	0	0	P10894	1-phosphatidylinositol 4,5-bisphosphate phosphodiesterase beta-1 (EC 3.1.4.11) (PLC-154) (Phosphoinositide phospholipase C-beta-1) (Phospholipase C-beta-1) (PLC-beta-1)	Plcb1	Plcb
TRINITY_DN27662_c0_g1	0	0	0	0	0	O60239	SH3 domain-binding protein 5 (SH3BP-5) (SH3 domain-binding protein that preferentially associates with BTK)	Sh3bp5	Sab
TRINITY_DN27675_c0_g1	0	0	0	0	0	Q13315	Serine-protein kinase ATM (EC 2.7.11.1) (Ataxia telangiectasia mutated homolog) (A-T mutated homolog)	Atm
TRINITY_DN27693_c0_g1	0	0	0	0	0	P36551	Oxygen-dependent coproporphyrinogen-III oxidase, mitochondrial (COX) (Coprogen oxidase) (Coproporphyrinogenase) (EC 1.3.3.3)	Cpox	Cpo
TRINITY_DN27708_c0_g2	0	0	0	0	0	E1B932	Kelch-like protein 12 (CUL3-interacting protein 1)	Klhl12	C3ip1
TRINITY_DN2771_c0_g1	0	0	0	0	0	Q6F3F9	Adhesion G-protein coupled receptor G6 (Developmentally regulated G-protein-coupled receptor) (G-protein coupled receptor 126) [Cleaved into: ADGRG6 N-terminal fragment (ADGRG6-NTF); ADGRG6 C-terminal fragment (ADGRG6-CTF)]	Adgrg6	Dreg	Gm222	Gpr126
TRINITY_DN27716_c0_g1	0	0	0	0	0	P13497	Bone morphogenetic protein 1 (BMP-1) (EC 3.4.24.19) (Mammalian tolloid protein) (mTld) (Procollagen C-proteinase) (PCP)	Bmp1
TRINITY_DN2773_c0_g2	0	0	0	0	0	Q0PMD2	Anthrax toxin receptor 1 (Tumor endothelial marker 8)	Antxr1	Atr	Tem8
TRINITY_DN27744_c0_g1	0	0	0	0	0	O18783	Plasminogen (EC 3.4.21.7) [Cleaved into: Plasmin heavy chain A; Activation peptide; Angiostatin; Plasmin heavy chain A, short form; Plasmin light chain B]	Plg
TRINITY_DN27745_c0_g1	0	0	0	0	0	Q641G7	Actin-related protein 2/3 complex subunit 4 (Arp2/3 complex 20 kDa subunit) (p20-ARC)	Arpc4	Arc20
TRINITY_DN27760_c0_g1	0	0	0	0	0	Q96DM1	#N/A	#N/A
TRINITY_DN27775_c0_g1	0	0	0	0	0	Q5ZLX5	Zinc finger Ran-binding domain-containing protein 2 (Zinc finger protein 265) (Zinc finger, splicing)	Zranb2	Zfp265	Zis	Znf265
TRINITY_DN27803_c0_g1	0	0	0	0	0	C6JUN9	#N/A	#N/A
TRINITY_DN27840_c0_g1	0	0	0	0	0	Q8BUL5	Kelch-like protein 7	Klhl7
TRINITY_DN27852_c0_g1	0	0	0	0	0	Q9NVR0	Kelch-like protein 11	Klhl11
TRINITY_DN2786_c0_g1	0	0	0	0	0	Q924I2	Mitogen-activated protein kinase kinase kinase kinase 2 (EC 2.7.11.1) (Germinal center kinase) (GCK) (MAPK/ERK kinase kinase kinase 2) (MEK kinase kinase 2) (MEKKK 2) (Rab8-interacting protein)	Map4k2	Rab8ip
TRINITY_DN278691_c0_g1	0	0	0	0	0	Q556Q3	#N/A	#N/A
TRINITY_DN27887_c0_g1	0	0	0	0	0	A0JM24	NADP-dependent oxidoreductase domain-containing protein 1 (EC 1.-.-.-) (Pyrroline-5-carboxylate reductase-like protein C14orf148 homolog)	Noxred1
TRINITY_DN27910_c0_g1	0	0	0	0	0	P22589	Polyubiquitin-B [Cleaved into: Ubiquitin]	Ubb
TRINITY_DN27953_c0_g1	0	0	0	0	0	O95271	Poly [ADP-ribose] polymerase tankyrase-1 (EC 2.4.2.30) (ADP-ribosyltransferase diphtheria toxin-like 5) (ARTD5) (Protein poly-ADP-ribosyltransferase tankyrase-1) (EC 2.4.2.-) (TRF1-interacting ankyrin-related ADP-ribose polymerase 1) (Tankyrase I) (Tankyrase-1) (TANK1)	Tnks	Tnks1
TRINITY_DN27977_c0_g3	0	0	0	0	0	Q1EHB4	Sodium-coupled monocarboxylate transporter 2 (Electroneutral sodium monocarboxylate cotransporter) (Low-affinity sodium-lactate cotransporter) (Solute carrier family 5 member 12)	Slc5a12	Smct2
TRINITY_DN280_c0_g1	0	0	0	0	0	Q86YW7	Glycoprotein hormone beta-5 (Thyrostimulin subunit beta)	Gphb5	Gpb5	Zlut1
TRINITY_DN280243_c0_g1	0	0	0	0	0	Q8IX06	RNA exonuclease 1 homolog (EC 3.1.-.-) (Transcription elongation factor B polypeptide 3-binding protein 1)	Rexo1	Kiaa1138	Tceb3bp1
TRINITY_DN28050_c0_g2	0	0	0	0	0	Q2LKW6	#N/A	#N/A
TRINITY_DN2806_c0_g1	0	0	0	0	0	Q8BKC5	Importin-5 (Imp5) (Importin subunit beta-3) (Karyopherin beta-3) (Ran-binding protein 5) (RanBP5)	Ipo5	Kpnb3	Ranbp5
TRINITY_DN28074_c0_g1	0	0	0	0	0	Q9C0J8	pre-mRNA 3' end processing protein WDR33 (WD repeat-containing protein 33) (WD repeat-containing protein of 146 kDa)	Wdr33	Wdc146
TRINITY_DN28148_c0_g2	0	0	0	0	0	Q0GC71	#N/A	#N/A
TRINITY_DN28173_c1_g1	0	0	0	0	0	Q5U374	#N/A	#N/A
TRINITY_DN2819_c0_g1	0	0	0	0	0	Q6DHI1	Palmitoyltransferase ZDHHC3 (EC 2.3.1.225) (Acyltransferase ZDHHC3) (EC 2.3.1.-) (GABA-A receptor-associated membrane protein 1) (Golgi-specific DHHC zinc finger protein) (Zinc finger DHHC domain-containing protein 3) (DHHC-3)	Zdhhc3	Godz	Gramp1
TRINITY_DN2819_c0_g2	0	0	0	0	0	Q7ZW38	Selenide, water dikinase 1 (EC 2.7.9.3) (Selenium donor protein 1) (Selenophosphate synthase 1)	Sephs1	Sps1
TRINITY_DN28200_c0_g1	0	0	0	0	0	B5XCB8	#N/A	#N/A
TRINITY_DN28211_c0_g1	0	0	0	0	0	Q66HG5	Transmembrane 9 superfamily member 2	Tm9sf2
TRINITY_DN28244_c0_g1	0	0	0	0	0	Q9NZR2	Low-density lipoprotein receptor-related protein 1B (LRP-1B) (Low-density lipoprotein receptor-related protein-deleted in tumor) (LRP-DIT)	Lrp1b	Lrpdit
TRINITY_DN282545_c0_g1	0	0	0	0	0	O19058	4-galactosyl-N-acetylglucosaminide 3-alpha-L-fucosyltransferase 9 (EC 2.4.1.152) (Fucosyltransferase 9) (Fucosyltransferase IX) (Fuc-TIX) (FucT-IX) (Galactoside 3-L-fucosyltransferase)	Fut9
TRINITY_DN28293_c0_g1	0	0	0	0	0	Q05940	Synaptic vesicular amine transporter (Monoamine transporter) (Solute carrier family 18 member 2) (Vesicular amine transporter 2) (VAT2)	Slc18a2	Vmat2
TRINITY_DN28308_c0_g1	0	0	0	0	0	P14912	#N/A	#N/A
TRINITY_DN2832_c0_g1	0	0	0	0	0	O14981	DNA excision repair protein ERCC-6 (EC 3.6.4.-) (ATP-dependent helicase ERCC6) (Cockayne syndrome protein CSB)	Ercc6	Csb
TRINITY_DN28340_c2_g1	0	0	0	0	0	E0CZ16	Kelch-like protein 3	Klhl3
TRINITY_DN2835_c0_g1	0	0	0	0	0	Q6DN90	IQ motif and SEC7 domain-containing protein 1	Iqsec1	Kiaa0763
TRINITY_DN2837_c0_g1	0	0	0	0	0	Q3U564	mRNA-decapping enzyme 1B (EC 3.-.-.-)	Dcp1b
TRINITY_DN2839_c0_g1	0	0	0	0	0	Q9QUJ1	Cytochrome P450 2D9 (EC 1.14.14.1) (CYPIID9) (Cytochrome P450-16-alpha) (Cytochrome P450CA) (Testosterone 16-alpha hydroxylase)	Cyp2d9	Cyp2d-9
TRINITY_DN2841_c0_g1	0	0	0	0	0	Q6DFF6	Kelch-like protein 20 (Kelch-like ECT2-interacting protein)	Klhl20	Kiaa4210	Kleip
TRINITY_DN28452_c0_g2	0	0	0	0	0	Q5ZKJ5	Transmembrane protein 180 (Major facilitator superfamily domain-containing 13A)	Mfsd13a	Tmem180
TRINITY_DN28461_c0_g1	0	0	0	0	0	Q91ZW7	CD209 antigen-like protein E (DC-SIGN-related protein 4) (DC-SIGNR4) (CD antigen CD209)	Cd209e
TRINITY_DN2852_c0_g2	0	0	0	0	0	Q7Z6Z7	E3 ubiquitin-protein ligase HUWE1 (EC 2.3.2.26) (E3Histone) (HECT, UBA and WWE domain-containing protein 1) (HECT-type E3 ubiquitin transferase HUWE1) (Upstream regulatory element-binding protein 1) (URE-B1) (URE-binding protein 1)	Huwe1	Kiaa0312	Ureb1
TRINITY_DN28542_c0_g1	0	0	0	0	0	Q1LXK4	Putative helicase MOV-10 (EC 3.6.4.13) (Moloney leukemia virus 10 protein)	Mov10	Gb110
TRINITY_DN28562_c0_g1	0	0	0	0	0	P98107	#N/A	#N/A
TRINITY_DN28578_c0_g1	0	0	0	0	0	Q923L3	CUB and sushi domain-containing protein 1 (CUB and sushi multiple domains protein 1)	Csmd1
TRINITY_DN28593_c0_g1	0	0	0	0	0	Q9D2L5	Inactive carboxypeptidase-like protein X2	Cpxm2	Cpx2
TRINITY_DN286_c0_g1	0	0	0	0	0	Q9NUP1	Biogenesis of lysosome-related organelles complex 1 subunit 4 (BLOC-1 subunit 4) (Protein cappuccino homolog)	Bloc1s4	Cno
TRINITY_DN28601_c0_g1	0	0	0	0	0	Q8VCK5	Kelch-like protein 20 (Kelch-like ECT2-interacting protein)	Klhl20	Kiaa4210	Kleip
TRINITY_DN28606_c0_g1	0	0	0	0	0	Q80ZA4	Fibrocystin-L (Polycystic kidney and hepatic disease 1-like protein 1) (PKHD1-like protein 1) (Protein D86)	Pkhd1l1
TRINITY_DN28613_c0_g1	0	0	0	0	0	Q5F457	WW domain-binding protein 4 (WBP-4) (Formin-binding protein 21) (WW domain-containing-binding protein 4)	Wbp4	Fbp21	Fnbp21
TRINITY_DN2863_c0_g1	0	0	0	0	0	Q08D01	Mediator of RNA polymerase II transcription subunit 29 (Intersex-like protein) (Mediator complex subunit 29)	Med29	Ixl
TRINITY_DN28637_c0_g1	0	0	0	0	0	Q9H0H3	Kelch-like protein 25 (Ectoderm-neural cortex protein 2) (ENC-2)	Klhl25	Enc2
TRINITY_DN28637_c1_g1	0	0	0	0	0	Q5XHZ6	E3 ubiquitin-protein ligase DTX3L (EC 2.3.2.27) (Protein deltex-3-like) (RING-type E3 ubiquitin transferase DTX3L)	Dtx3l	Bbap
TRINITY_DN2869_c0_g3	0	0	0	0	0	Q11011	Puromycin-sensitive aminopeptidase (PSA) (EC 3.4.11.14) (Cytosol alanyl aminopeptidase) (AAP-S)	Npepps	Psa
TRINITY_DN28695_c0_g1	0	0	0	0	0	Q6ZFH6	#N/A	#N/A
TRINITY_DN28705_c0_g1	0	0	0	0	0	Q8R087	Beta-1,4-galactosyltransferase 7 (Beta-1,4-GalTase 7) (Beta4Gal-T7) (b4Gal-T7) (EC 2.4.1.-) (Proteoglycan UDP-galactose:beta-xylose beta1,4-galactosyltransferase I) (UDP-Gal:beta-GlcNAc beta-1,4-galactosyltransferase 7) (UDP-galactose:beta-N-acetylglucosamine beta-1,4-galactosyltransferase 7) (UDP-galactose:beta-xylose beta-1,4-galactosyltransferase) (XGPT) (XGalT-1) (Xylosylprotein 4-beta-galact…	B4galt7	Xgalt1
TRINITY_DN28721_c0_g1	0	0	0	0	0	Q96RW7	#N/A	#N/A
TRINITY_DN28760_c0_g1	0	0	0	0	0	P11369	#N/A	#N/A
TRINITY_DN2877_c0_g1	0	0	0	0	0	Q9CQM0	Nicolin-1 (Tubulin polyglutamylase complex subunit 5) (PGs5) (p24)	Nicn1
TRINITY_DN28774_c0_g1	0	0	0	0	0	O43143	Pre-mRNA-splicing factor ATP-dependent RNA helicase DHX15 (EC 3.6.4.13) (DEAH box protein 15)	Dhx15	Ddx15	Deah9
TRINITY_DN28775_c0_g1	0	0	0	0	0	Q6R7M4	Cytochrome P450 2J6 (EC 1.14.14.1) (Arachidonic acid epoxygenase) (CYPIIJ6)	Cyp2j6
TRINITY_DN28781_c1_g1	0	0	0	0	0	Q8IXQ5	#N/A	#N/A
TRINITY_DN28808_c0_g1	0	0	0	0	0	E9Q555	E3 ubiquitin-protein ligase RNF213 (EC 2.3.2.27) (EC 3.6.4.-) (Mysterin) (RING finger protein 213) (RING-type E3 ubiquitin transferase RNF213)	Rnf213	Mystr
TRINITY_DN2883_c0_g1	0	0	0	0	0	P86854	#N/A	#N/A
TRINITY_DN2883_c0_g2	0	0	0	0	0	P86854	#N/A	#N/A
TRINITY_DN2887_c0_g1	0	0	0	0	0	P10746	Uroporphyrinogen-III synthase (UROIIIS) (UROS) (EC 4.2.1.75) (Hydroxymethylbilane hydrolyase [cyclizing]) (Uroporphyrinogen-III cosynthase)	Uros	Uros3
TRINITY_DN28907_c0_g2	0	0	0	0	0	Q96MB7	Putative nuclease HARBI1 (EC 3.1.-.-) (Harbinger transposase-derived nuclease)	Harbi1
TRINITY_DN2895_c0_g1	0	0	0	0	0	Q5RFD3	Proteasome activator complex subunit 3 (11S regulator complex subunit gamma) (REG-gamma) (Activator of multicatalytic protease subunit 3) (Ki nuclear autoantigen) (Proteasome activator 28 subunit gamma) (PA28g) (PA28gamma)	Psme3
TRINITY_DN2898_c1_g1	0	0	0	0	0	Q9Z0Y9	Oxysterols receptor LXR-alpha (Liver X receptor alpha) (Nuclear receptor subfamily 1 group H member 3)	Nr1h3	Lxra
TRINITY_DN2899_c0_g1	0	0	0	0	0	Q99LW6	YY1-associated factor 2	Yaf2
TRINITY_DN290_c4_g2	0	0	0	0	0	Q4R9C4	G2/M phase-specific E3 ubiquitin-protein ligase (EC 2.3.2.26) (G2/M phase-specific HECT-type E3 ubiquitin transferase)	G2e3	Kiaa1333
TRINITY_DN29008_c0_g1	0	0	0	0	0	E9QAM5	Helicase with zinc finger domain 2 (EC 3.6.4.-) (PPAR-gamma DNA-binding domain-interacting protein 1) (PDIP1) (PPAR-gamma DBD-interacting protein 1)	Helz2
TRINITY_DN2901_c0_g1	0	0	0	0	0	Q8R143	Pituitary tumor-transforming gene 1 protein-interacting protein (Pituitary tumor-transforming gene protein-binding factor) (PBF) (PTTG-binding factor)	Pttg1ip
TRINITY_DN2909_c0_g1	0	0	0	0	0	Q5RBN8	Protein lin-54 homolog	Lin54	Kiaa2037
TRINITY_DN29090_c0_g1	0	0	0	0	0	Q62261	Spectrin beta chain, non-erythrocytic 1 (Beta-II spectrin) (Embryonic liver fodrin) (Fodrin beta chain)	Sptbn1	Elf	Spnb-2	Spnb2	Sptb2
TRINITY_DN29119_c0_g1	0	0	0	0	0	O46503	Sulfotransferase 1C2 (ST1C2) (EC 2.8.2.-)	Sult1c2	Sult1c1
TRINITY_DN29119_c0_g2	0	0	0	0	0	Q9BR01	Sulfotransferase 4A1 (ST4A1) (EC 2.8.2.-) (Brain sulfotransferase-like protein) (mBR-STL) (Nervous system sulfotransferase) (NST)	Sult4a1	Sultx3
TRINITY_DN29156_c1_g1	0	0	0	0	0	Q66KG0	Solute carrier family 22 member 21 (Organic cation/carnitine transporter 3) (Solute carrier family 22 member 9)	Slc22a21	Octn3	Slc22a9
TRINITY_DN2917_c0_g1	0	0	0	0	0	P08953	Toll-like receptor 2 (EC 3.2.2.6) (CD antigen CD282)	Tlr2
TRINITY_DN29185_c0_g1	0	0	0	0	0	Q8TEP8	#N/A	#N/A
TRINITY_DN29203_c0_g1	0	0	0	0	0	Q08C76	#N/A	#N/A
TRINITY_DN29204_c0_g2	0	0	0	0	0	Q8BNA6	Protocadherin Fat 3 (FAT tumor suppressor homolog 3)	Fat3	Gm1132	Gm510
TRINITY_DN29228_c0_g1	0	0	0	0	0	E9Q555	E3 ubiquitin-protein ligase RNF213 (EC 2.3.2.27) (EC 3.6.4.-) (Mysterin) (RING finger protein 213) (RING-type E3 ubiquitin transferase RNF213)	Rnf213	Mystr
TRINITY_DN29242_c0_g1	0	0	0	0	0	Q9Y5Y6	#N/A	#N/A
TRINITY_DN29245_c0_g2	0	0	0	0	0	Q98943	#N/A	#N/A
TRINITY_DN2925_c0_g1	0	0	0	0	0	Q6P3K7	Casein kinase I isoform delta (CKI-delta) (CKId) (EC 2.7.11.1) (Tau-protein kinase CSNK1D) (EC 2.7.11.26)	Csnk1d	Hckid
TRINITY_DN2926_c0_g1	0	0	0	0	0	O61491	Flotillin-1	Flot1
TRINITY_DN29265_c0_g3	0	0	0	0	0	P70490	Lactadherin (MFGM) (Milk fat globule-EGF factor 8) (MFG-E8) (SED1) (Sperm surface protein SP47) (MP47)	Mfge8
TRINITY_DN29266_c0_g1	0	0	0	0	0	Q8TC21	Zinc finger protein 2 (Zfp-2) (Protein mKR2)	Zfp2	Fnp-2	Mkr2	Zfp-2
TRINITY_DN29296_c0_g1	0	0	0	0	0	P15989	#N/A	#N/A
TRINITY_DN2930_c0_g1	0	0	0	0	0	Q9UHD1	Cysteine and histidine-rich domain-containing protein 1 (CHORD domain-containing protein 1) (CHORD-containing protein 1) (Chp-1) (Protein morgana)	Chordc1	Chp1	Morgana
TRINITY_DN29317_c0_g1	0	0	0	0	0	Q8R2H4	#N/A	#N/A
TRINITY_DN29322_c0_g1	0	0	0	0	0	Q6UWX4	HHIP-like protein 2	Hhipl2	Hhip3	Kiaa1822l
TRINITY_DN29420_c0_g1	0	0	0	0	0	Q92990	Glomulin (FK506-binding protein-associated protein) (FAP) (FKBP-associated protein)	Glmn	Fap48
TRINITY_DN2943_c0_g1	0	0	0	0	0	Q9Y5B8	Nucleoside diphosphate kinase 7 (NDK 7) (NDP kinase 7) (EC 2.7.4.6) (nm23-M7)	Nme7
TRINITY_DN29435_c0_g1	0	0	0	0	0	G3V801	Neurotrypsin (EC 3.4.21.-) (Brain-specific serine protease 3) (BSSP-3) (Motopsin) (Serine protease 12)	Prss12	Bssp3
TRINITY_DN2949_c6_g1	0	0	0	0	0	Q58D72	Atlastin-1 (EC 3.6.5.-) (Spastic paraplegia 3A homolog)	Atl1	Spg3a
TRINITY_DN29490_c0_g1	0	0	0	0	0	Q80ZI6	E3 ubiquitin-protein ligase LRSAM1 (EC 2.3.2.27) (Leucine-rich repeat and sterile alpha motif-containing protein 1) (RING-type E3 ubiquitin transferase LRSAM1) (Tsg101-associated ligase)	Lrsam1
TRINITY_DN29504_c0_g1	0	0	0	0	0	Q8CCS2	#N/A	#N/A
TRINITY_DN2951_c0_g1	0	0	0	0	0	Q2KI00	Protein FAM107B	Fam107b
TRINITY_DN29584_c0_g2	0	0	0	0	0	Q9P2G9	#N/A	#N/A
TRINITY_DN29593_c0_g1	0	0	0	0	0	Q86W24	#N/A	#N/A
TRINITY_DN29596_c0_g1	0	0	0	0	0	Q96NJ5	#N/A	#N/A
TRINITY_DN29612_c0_g1	0	0	0	0	0	L7YAI7	Beta-1,4-glucuronyltransferase 1 (EC 2.4.1.-) (I-beta-1,3-N-acetylglucosaminyltransferase) (iGnT) (N-acetyllactosaminide beta-1,3-N-acetylglucosaminyltransferase) (Poly-N-acetyllactosamine extension enzyme) (UDP-GlcNAc:betaGal beta-1,3-N-acetylglucosaminyltransferase 1)	B4gat1	B3gnt1	B3gnt6
TRINITY_DN29615_c0_g1	0	0	0	0	0	P59047	#N/A	#N/A
TRINITY_DN2962_c0_g1	0	0	0	0	0	Q9Y6J9	TAF6-like RNA polymerase II p300/CBP-associated factor-associated factor 65 kDa subunit 6L (TAF6L) (PCAF-associated factor 65-alpha) (PAF65-alpha)	Taf6l	Paf65a
TRINITY_DN29621_c0_g1	0	0	0	0	0	Q7RTY7	Transmembrane protease serine 6 (EC 3.4.21.-) (Matriptase-2)	Tmprss6
TRINITY_DN2965_c0_g1	0	0	0	0	0	Q9CZ04	COP9 signalosome complex subunit 7a (SGN7a) (Signalosome subunit 7a) (JAB1-containing signalosome subunit 7a)	Cops7a	Csn7a
TRINITY_DN2966_c0_g1	0	0	0	0	0	Q9N294	Acetylgalactosaminyl-O-glycosyl-glycoprotein beta-1,3-N-acetylglucosaminyltransferase (EC 2.4.1.147) (Core 3 synthase) (UDP-GlcNAc:betaGal beta-1,3-N-acetylglucosaminyltransferase 6) (BGnT-6) (Beta-1,3-Gn-T6) (Beta-1,3-N-acetylglucosaminyltransferase 6) (Beta3Gn-T6)	B3gnt6
TRINITY_DN2968_c0_g1	0	0	0	0	0	Q9UGI0	Ubiquitin thioesterase Zranb1 (EC 3.4.19.12) (Zinc finger Ran-binding domain-containing protein 1)	Zranb1	Trabid
TRINITY_DN29682_c0_g1	0	0	0	0	0	Q9M2U3	Putative nuclease HARBI1 (EC 3.1.-.-) (Harbinger transposase-derived nuclease)	Harbi1
TRINITY_DN297_c1_g2	0	0	0	0	0	Q9NBX4	LINE-1 retrotransposable element ORF2 protein (ORF2p) (Long interspersed element-1) (L1) (Retrovirus-related Pol polyprotein LINE-1) [Includes: Reverse transcriptase (EC 2.7.7.49); Endonuclease (EC 3.1.21.-)]	Pol	Gm17492
TRINITY_DN29728_c0_g1	0	0	0	0	0	Q640P2	Angiopoietin-related protein 1 (Angiopoietin-like protein 1)	Angptl1
TRINITY_DN29745_c0_g1	0	0	0	0	0	Q6ZMY6	WD repeat-containing protein 5B	Wdr5b
TRINITY_DN29786_c0_g1	0	0	0	0	0	Q62862	Dual specificity mitogen-activated protein kinase kinase 5 (MAP kinase kinase 5) (MAPKK 5) (EC 2.7.12.2) (MAPK/ERK kinase 5) (MEK 5)	Map2k5	Mek5	Mkk5	Prkmk5
TRINITY_DN2980_c0_g1	0	0	0	0	0	Q9ESM0	Inositol hexakisphosphate kinase 1 (InsP6 kinase 1) (EC 2.7.4.21) (Inositol hexaphosphate kinase 1)	Ip6k1	Ihpk1
TRINITY_DN29802_c0_g1	0	0	0	0	0	Q63355	#N/A	#N/A
TRINITY_DN29803_c0_g1	0	0	0	0	0	Q969T9	WW domain-binding protein 2 (WBP-2)	Wbp2
TRINITY_DN29826_c0_g1	0	0	0	0	0	P11369	LINE-1 retrotransposable element ORF2 protein (ORF2p) (Long interspersed element-1) (L1) (Retrovirus-related Pol polyprotein LINE-1) [Includes: Reverse transcriptase (EC 2.7.7.49); Endonuclease (EC 3.1.21.-)]	Pol	Gm17492
TRINITY_DN29861_c0_g2	0	0	0	0	0	Q14590	Zinc finger protein 2 (Zfp-2) (Protein mKR2)	Zfp2	Fnp-2	Mkr2	Zfp-2
TRINITY_DN29866_c1_g1	0	0	0	0	0	Q67EQ0	#N/A	#N/A
TRINITY_DN29928_c0_g1	0	0	0	0	0	F4ZGF2	Catechol O-methyltransferase (EC 2.1.1.6)	Comt	Comt1
TRINITY_DN29937_c0_g1	0	0	0	0	0	P31649	Sodium- and chloride-dependent GABA transporter 2 (GAT-2) (Sodium- and chloride-dependent GABA transporter 3) (GAT-3) (Solute carrier family 6 member 13)	Slc6a13	Gabt2	Gabt3	Gat-3	Gat2	Gat3
TRINITY_DN2994_c0_g1	0	0	0	0	0	Q566V0	Protein archease (Protein ZBTB8OS)	Zbtb8os	Arch
TRINITY_DN29943_c0_g1	0	0	0	0	0	Q90660	Baculoviral IAP repeat-containing protein 2 (EC 2.3.2.27) (Cellular inhibitor of apoptosis 1) (C-IAP1) (Inhibitor of apoptosis protein 2) (mIAP2) (RING-type E3 ubiquitin transferase BIRC2)	Birc2
TRINITY_DN29943_c1_g1	0	0	0	0	0	A1E2V0	Baculoviral IAP repeat-containing protein 2 (EC 2.3.2.27) (Cellular inhibitor of apoptosis 1) (C-IAP1) (Inhibitor of apoptosis protein 2) (mIAP2) (RING-type E3 ubiquitin transferase BIRC2)	Birc2
TRINITY_DN29943_c2_g2	0	0	0	0	0	Q62210	Baculoviral IAP repeat-containing protein 2 (EC 2.3.2.27) (Cellular inhibitor of apoptosis 1) (C-IAP1) (Inhibitor of apoptosis protein 2) (mIAP2) (RING-type E3 ubiquitin transferase BIRC2)	Birc2
TRINITY_DN29967_c0_g1	0	0	0	0	0	Q6AYP4	Zinc finger C2HC domain-containing protein 1C	Zc2hc1c	Fam164c
TRINITY_DN29982_c0_g1	0	0	0	0	0	Q9D733	Pancreatic secretory granule membrane major glycoprotein GP2 (Pancreatic zymogen granule membrane protein GP-2)	Gp2
TRINITY_DN3001_c0_g1	0	0	0	0	0	Q8TAP8	#N/A	#N/A
TRINITY_DN30028_c0_g2	0	0	0	0	0	E7F6F9	#N/A	#N/A
TRINITY_DN30057_c0_g1	0	0	0	0	0	Q9C5S2	Serine/threonine-protein kinase/endoribonuclease IRE1 (Endoplasmic reticulum-to-nucleus signaling 1) (Inositol-requiring protein 1) (Ire1-alpha) (IRE1a) [Includes: Serine/threonine-protein kinase (EC 2.7.11.1); Endoribonuclease (EC 3.1.26.-)]	Ern1	Ire1
TRINITY_DN30080_c0_g2	0	0	0	0	0	Q6AZB8	#N/A	#N/A
TRINITY_DN3011_c0_g1	0	0	0	0	0	Q8N1B3	Cyclin-Q (CDK10-activating cyclin) (Cyclin-M) (Cyclin-related protein FAM58A) (Cyclin-related protein FAM58B)	Ccnq	Fam58a	Fam58b
TRINITY_DN30131_c0_g1	0	0	0	0	0	P29843	Heat shock cognate 71 kDa protein (Heat shock 70 kDa protein 8)	Hspa8	Hsc70	Hsc73
TRINITY_DN3016_c0_g1	0	0	0	0	0	Q641A1	Poly(A) RNA polymerase GLD2 (mGLD-2) (EC 2.7.7.19) (PAP-associated domain-containing protein 4) (Terminal nucleotidyltransferase 2)	Tent2	Gld2	Papd4
TRINITY_DN30163_c0_g1	0	0	0	0	0	Q53G59	Kelch-like protein 12 (CUL3-interacting protein 1)	Klhl12	C3ip1
TRINITY_DN3017_c2_g1	0	0	0	0	0	P51946	Cyclin-H	Ccnh
TRINITY_DN3017_c3_g2	0	0	0	0	0	Q5EB97	Zinc finger CCHC domain-containing protein 10	Zcchc10
TRINITY_DN3018_c1_g1	0	0	0	0	0	Q5R8I6	TBC1 domain family member 23	Tbc1d23
TRINITY_DN3018_c2_g1	0	0	0	0	0	Q94HW2	#N/A	#N/A
TRINITY_DN30213_c0_g1	0	0	0	0	0	Q6UDG6	Uracil-DNA glycosylase (UDG) (EC 3.2.2.27)	Ung	Ung1
TRINITY_DN30255_c0_g1	0	0	0	0	0	Q53B88	#N/A	#N/A
TRINITY_DN30275_c0_g1	0	0	0	0	0	P14381	LINE-1 retrotransposable element ORF2 protein (ORF2p) (Long interspersed element-1) (L1) (Retrovirus-related Pol polyprotein LINE-1) [Includes: Reverse transcriptase (EC 2.7.7.49); Endonuclease (EC 3.1.21.-)]	Pol	Gm17492
TRINITY_DN30292_c0_g2	0	0	0	0	0	O15439	Multidrug resistance-associated protein 5 (ATP-binding cassette sub-family C member 5) (Multi-specific organic anion transporter C) (MOAT-C) (SMRP)	Abcc5	Abcc5a	Mrp5
TRINITY_DN3035_c0_g1	0	0	0	0	0	Q90663	Semaphorin-3D	Sema3d
TRINITY_DN30359_c0_g1	0	0	0	0	0	P21328	#N/A	#N/A
TRINITY_DN30392_c0_g1	0	0	0	0	0	Q6NUB3	Solute carrier family 22 member 15	Slc22a15
TRINITY_DN3045_c0_g1	0	0	0	0	0	Q28DX0	Queuine tRNA-ribosyltransferase accessory subunit 2 (Queuine tRNA-ribosyltransferase domain-containing protein 1)	Qtrt2	Qtrtd1
TRINITY_DN3048_c1_g1	0	0	0	0	0	Q6AZB8	#N/A	#N/A
TRINITY_DN30525_c0_g1	0	0	0	0	0	Q9DBK0	Acetyl-coenzyme A thioesterase (EC 3.1.2.1) (Acyl-CoA thioester hydrolase 12) (Acyl-coenzyme A thioesterase 12) (Acyl-CoA thioesterase 12) (Cytoplasmic acetyl-CoA hydrolase 1) (CACH-1) (mCACH-1)	Acot12	Cach	Cach1
TRINITY_DN30530_c0_g1	0	0	0	0	0	O14980	Exportin-1 (Exp1) (Chromosome region maintenance 1 protein homolog)	Xpo1	Crm1
TRINITY_DN30534_c0_g1	0	0	0	0	0	Q9Z1E9	Golgi apparatus protein 1 (E-selectin ligand 1) (ESL-1) (Selel) (Golgi sialoglycoprotein MG-160)	Glg1	Esl1	Mg160	Selel
TRINITY_DN3056_c0_g3	0	0	0	0	0	Q95327	#N/A	#N/A
TRINITY_DN30565_c0_g1	0	0	0	0	0	Q8VCK5	Kelch-like protein 20 (Kelch-like ECT2-interacting protein)	Klhl20	Kiaa4210	Kleip
TRINITY_DN3059_c0_g1	0	0	0	0	0	Q52LW3	Rho GTPase-activating protein 29 (Rho-type GTPase-activating protein 29)	Arhgap29
TRINITY_DN306_c0_g1	0	0	0	0	0	Q8R081	Heterogeneous nuclear ribonucleoprotein L (hnRNP L)	Hnrnpl	Hnrpl
TRINITY_DN3062_c0_g1	0	0	0	0	0	Q9NQP4	Uncharacterized protein C9orf85 homolog	0
TRINITY_DN3068_c0_g1	0	0	0	0	0	Q6DGW9	Calcium load-activated calcium channel (CLAC channel) (Transmembrane and coiled-coil domain-containing protein 1)	Tmco1
TRINITY_DN3069_c0_g2	0	0	0	0	0	P22907	Porphobilinogen deaminase (PBG-D) (EC 2.5.1.61) (Hydroxymethylbilane synthase) (HMBS) (Pre-uroporphyrinogen synthase)	Hmbs	Uros1
TRINITY_DN30738_c0_g1	0	0	0	0	0	P16332	Methylmalonyl-CoA mutase, mitochondrial (MCM) (EC 5.4.99.2) (Methylmalonyl-CoA isomerase)	Mmut	Mut
TRINITY_DN30745_c0_g1	0	0	0	0	0	Q5RC74	Derlin-2 (Degradation in endoplasmic reticulum protein 2) (Der1-like protein 2) (F-LANa)	Derl2	Der2	Flana
TRINITY_DN30777_c0_g1	0	0	0	0	0	P02707	C-type lectin domain family 4 member F (C-type lectin superfamily member 13) (C-type lectin 13) (Kupffer cell receptor)	Clec4f	Clecsf13	Kclr
TRINITY_DN30784_c0_g1	0	0	0	0	0	A9ULZ2	Baculoviral IAP repeat-containing protein 2 (EC 2.3.2.27) (Cellular inhibitor of apoptosis 1) (C-IAP1) (Inhibitor of apoptosis protein 2) (mIAP2) (RING-type E3 ubiquitin transferase BIRC2)	Birc2
TRINITY_DN3082_c0_g1	0	0	0	0	0	Q6INH1	E3 ubiquitin ligase Rnf157 (EC 2.3.2.27) (RING finger protein 157) (RING-type E3 ubiquitin transferase Rnf157)	Rnf157	Kiaa1917
TRINITY_DN30828_c0_g1	0	0	0	0	0	Q8CG45	Aflatoxin B1 aldehyde reductase member 2 (EC 1.1.1.n11) (Succinic semialdehyde reductase) (SSA reductase)	Akr7a2	Afar	Akr7a5
TRINITY_DN3085_c0_g1	0	0	0	0	0	B5DGI7	RNA-binding protein 8A (RNA-binding motif protein 8A) (Ribonucleoprotein RBM8A)	Rbm8a	Rbm8
TRINITY_DN3087_c1_g2	0	0	0	0	0	O43422	52 kDa repressor of the inhibitor of the protein kinase (p52rIPK) (58 kDa interferon-induced protein kinase-interacting protein) (p58IPK-interacting protein) (THAP domain-containing protein 0) (THAP domain-containing protein 12)	Thap12	Prkrir	Thap0
TRINITY_DN3089_c0_g1	0	0	0	0	0	Q8TC12	Retinol dehydrogenase 11 (EC 1.1.1.300) (Androgen-regulated short-chain dehydrogenase/reductase 1) (Cell line MC/9.IL4-derived protein 1) (M42C60) (Prostate short-chain dehydrogenase/reductase 1) (Retinal reductase 1) (RalR1) (Short-chain aldehyde dehydrogenase) (SCALD)	Rdh11	Arsdr1	Mdt1	Psdr1
TRINITY_DN309_c0_g1	0	0	0	0	0	Q01815	Voltage-dependent L-type calcium channel subunit alpha-1C (Calcium channel, L type, alpha-1 polypeptide, isoform 1, cardiac muscle) (MELC-CC) (Mouse brain class C) (MBC) (Voltage-gated calcium channel subunit alpha Cav1.2)	Cacna1c	Cach2	Cacn2	Cacnl1a1	Cchl1a1
TRINITY_DN3095_c2_g1	0	0	0	0	0	Q5U374	Kelch-like protein 12 (CUL3-interacting protein 1)	Klhl12	C3ip1
TRINITY_DN3095_c20_g1	0	0	0	0	0	Q9H0H3	#N/A	#N/A
TRINITY_DN30982_c0_g1	0	0	0	0	0	Q5R7B8	Kelch-like protein 20 (Kelch-like ECT2-interacting protein)	Klhl20	Kiaa4210	Kleip
TRINITY_DN30985_c0_g2	0	0	0	0	0	Q9CSH3	Exosome complex exonuclease RRP44 (EC 3.1.13.-) (EC 3.1.26.-) (Protein DIS3 homolog) (Ribosomal RNA-processing protein 44)	Dis3	Kiaa1008	Rrp44
TRINITY_DN30991_c0_g1	0	0	0	0	0	Q5ZLA6	Unconventional myosin-Ic (Myosin I beta) (MMI-beta) (MMIb)	Myo1c
TRINITY_DN31012_c0_g2	0	0	0	0	0	P20397	Nucleolin (Protein C23)	Ncl	Nuc
TRINITY_DN31029_c0_g1	0	0	0	0	0	Q29599	2'-5'-oligoadenylate synthase 1A ((2-5')oligo(A) synthase 1A) (2-5A synthase 1A) (EC 2.7.7.84) (p42 OAS)	Oas1a	Oias1
TRINITY_DN31071_c0_g1	0	0	0	0	0	Q5U374	#N/A	#N/A
TRINITY_DN31071_c2_g1	0	0	0	0	0	Q9Y573	Actin-binding protein IPP (Intracisternal A particle-promoted polypeptide) (IPP) (Murine IAP-promoted placenta-expressed protein) (Protein MIPP)	Ipp	Mipp
TRINITY_DN3108_c0_g1	0	0	0	0	0	Q8VI33	Transcription initiation factor TFIID subunit 9 (RNA polymerase II TBP-associated factor subunit G) (Transcription initiation factor TFIID 31 kDa subunit) (TAFII-31) (TAFII31) (Transcription initiation factor TFIID 32 kDa subunit) (TAFII-32) (TAFII32)	Taf9	Taf2g
TRINITY_DN31099_c0_g1	0	0	0	0	0	Q7RTY7	Plasma kallikrein (EC 3.4.21.34) (Fletcher factor) (Kininogenin) (Plasma prekallikrein) [Cleaved into: Plasma kallikrein heavy chain; Plasma kallikrein light chain]	Klkb1	Klk3	Pk
TRINITY_DN31119_c0_g1	0	0	0	0	0	Q99466	#N/A	#N/A
TRINITY_DN3112_c0_g2	0	0	0	0	0	Q6NZN0	RNA-binding protein 26 (Protein expressed in male leptotene and zygotene spermatocytes 393) (MLZ-393) (RNA-binding motif protein 26)	Rbm26
TRINITY_DN31125_c0_g1	0	0	0	0	0	Q32LP2	Radixin (ESP10)	Rdx
TRINITY_DN31125_c0_g2	0	0	0	0	0	Q32LP2	Radixin (ESP10)	Rdx
TRINITY_DN31129_c0_g1	0	0	0	0	0	Q90660	#N/A	#N/A
TRINITY_DN31130_c0_g1	0	0	0	0	0	Q8C6K9	Collagen alpha-6(VI) chain	Col6a6
TRINITY_DN31130_c1_g3	0	0	0	0	0	A0JNI4	Serine racemase (EC 5.1.1.18) (D-serine ammonia-lyase) (D-serine dehydratase) (EC 4.3.1.18) (L-serine ammonia-lyase) (L-serine dehydratase) (EC 4.3.1.17)	Srr
TRINITY_DN3115_c0_g1	0	0	0	0	0	Q6NYL3	Peroxisomal bifunctional enzyme (PBE) (PBFE) (L-peroxisomal bifunctional enzyme) (L-PBE) (Multifunctional enzyme 1) (MFE1) (Multifunctional protein 1) (MFP-1) [Includes: Enoyl-CoA hydratase/3,2-trans-enoyl-CoA isomerase (EC 4.2.1.17) (EC 5.3.3.8); 3-hydroxyacyl-CoA dehydrogenase (EC 1.1.1.35)]	Ehhadh	L-pbe
TRINITY_DN3118_c0_g2	0	0	0	0	0	Q5ZL16	WD repeat domain phosphoinositide-interacting protein 3 (WIPI-3) (WD repeat-containing protein 45-like) (WDR45-like protein) (WD repeat-containing protein 45B)	Wdr45b	Wdr45l	Wipi3
TRINITY_DN3119_c0_g1	0	0	0	0	0	Q58HI1	Proline-, glutamic acid- and leucine-rich protein 1 (Modulator of non-genomic activity of estrogen receptor)	Pelp1	Mnar
TRINITY_DN31196_c0_g1	0	0	0	0	0	Q9Z2E3	#N/A	#N/A
TRINITY_DN31210_c0_g2	0	0	0	0	0	Q8BW94	Dynein heavy chain 3, axonemal (Axonemal beta dynein heavy chain 3) (Ciliary dynein heavy chain 3)	Dnah3	Dnahc3
TRINITY_DN31220_c0_g1	0	0	0	0	0	D2YVK5	#N/A	#N/A
TRINITY_DN3125_c0_g1	0	0	0	0	0	Q4V8K5	BRO1 domain-containing protein BROX (BRO1 domain- and CAAX motif-containing protein)	Brox
TRINITY_DN3129_c0_g1	0	0	0	0	0	Q9UKU7	Isobutyryl-CoA dehydrogenase, mitochondrial (EC 1.3.8.-) (Acyl-CoA dehydrogenase family member 8) (ACAD-8)	Acad8
TRINITY_DN3130_c0_g1	0	0	0	0	0	Q8CDU4	Dynein regulatory complex subunit 6 (F-box and leucine-rich repeat protein 13) (F-box/LRR-repeat protein 13)	Fbxl13	Drc6
TRINITY_DN31350_c0_g1	0	0	0	0	0	Q00685	Complement C3 (HSE-MSF) [Cleaved into: Complement C3 beta chain; C3-beta-c (C3bc); Complement C3 alpha chain; C3a anaphylatoxin; Acylation stimulating protein (ASP) (C3adesArg); Complement C3b alpha' chain; Complement C3c alpha' chain fragment 1; Complement C3dg fragment; Complement C3g fragment; Complement C3d fragment; Complement C3f fragment; Complement C3c alpha' chain fragment 2]	C3
TRINITY_DN31379_c0_g1	0	0	0	0	0	Q9S7Q7	#N/A	#N/A
TRINITY_DN31407_c0_g1	0	0	0	0	0	Q8BZZ3	NEDD4-like E3 ubiquitin-protein ligase WWP1 (EC 2.3.2.26) (HECT-type E3 ubiquitin transferase WWP1) (WW domain-containing protein 1)	Wwp1
TRINITY_DN31429_c0_g1	0	0	0	0	0	Q6ZQ11	Chondroitin sulfate synthase 1 (EC 2.4.1.175) (EC 2.4.1.226) (Chondroitin glucuronyltransferase 1) (Chondroitin synthase 1) (ChSy-1) (Glucuronosyl-N-acetylgalactosaminyl-proteoglycan 4-beta-N-acetylgalactosaminyltransferase 1) (N-acetylgalactosaminyl-proteoglycan 3-beta-glucuronosyltransferase 1) (N-acetylgalactosaminyltransferase 1)	Chsy1	Kiaa0990
TRINITY_DN31454_c0_g3	0	0	0	0	0	Q9P2G9	Kelch-like protein 18	Klhl18
TRINITY_DN3149_c0_g1	0	0	0	0	0	Q1JPD2	Phosphatidylserine lipase ABHD16A (EC 3.1.-.-) (Alpha/beta hydrolase domain-containing protein 16A) (Abhydrolase domain-containing protein 16A) (HLA-B-associated transcript 5) (mBAT5) (Monoacylglycerol lipase ABHD16A) (EC 3.1.1.23)	Abhd16a	Bat5	Ng26
TRINITY_DN315_c0_g2	0	0	0	0	0	P26378	ELAV-like protein 4 (Hu-antigen D) (HuD) (Paraneoplastic encephalomyelitis antigen HuD)	Elavl4	Hud
[truncated: 12,243 more rows]
[truncated: 22 more columns]
