# Supplementary material for: Stemness Activity Underlying Whole Brain Regeneration in a Basal Chordate
Source: Cells. 2022 Nov 22;11(23):3727. doi: 10.3390/cells11233727 (PMC9738451; doi:10.3390/cells11233727)
Supplement: Supplementary file 1 [file cells-11-03727-s001.zip › Supplementary Table 3_Pathway enrichment expression .xlsx]

## Sheet: Early_Enriched gene Set
GeneAnalytics - Analysis Report			Prepared for: Tal Gordon (talgordon@mail.tau.ac.il)
			Date: 7/22/2021
Copyright © LifeMap Sciences, Inc.
Species	Mouse
Identified genes (279)
Symbol	Full Name	Aliases	GeneCards URL
Abce1	ATP-binding cassette, sub-family E (OABP), member 1	C79080, O, Oabp, R, RLI, RNS41, RNS4I, Rnaseli	http://www.genecards.org/cgi-bin/carddisp.pl?gene=ABCE1
Abhd18	abhydrolase domain containing 18	2310068E01Rik, 3110057O12Rik, AI645591	http://www.genecards.org/cgi-bin/carddisp.pl?gene=ABHD18
Abhd4	abhydrolase domain containing 4	1110035H23Rik, AI429574, Abh4	http://www.genecards.org/cgi-bin/carddisp.pl?gene=ABHD4
Abitram	actin binding transcription modulator	Fam20, Fam206a, sim, simiate	http://www.genecards.org/cgi-bin/carddisp.pl?gene=ABITRAM
Acot7	acyl-CoA thioesterase 7	2410041A17Rik, AU01471, Ach1, Act, Bac, Bach, CTE-IIa, Cte-II, Lach1	http://www.genecards.org/cgi-bin/carddisp.pl?gene=ACOT7
Acox3	acyl-Coenzyme A oxidase 3, pristanoyl	BI685180, EST-s, EST-s59, PC, PCOX	http://www.genecards.org/cgi-bin/carddisp.pl?gene=ACOX3
Acsf3	acyl-CoA synthetase family member 3	BB101783	http://www.genecards.org/cgi-bin/carddisp.pl?gene=ACSF3
Actr10	ARP10 actin-related protein 10	Actr11, Ar, Arp11	http://www.genecards.org/cgi-bin/carddisp.pl?gene=ACTR10
Adat1	adenosine deaminase, tRNA-specific 1	MMADAT1, mADA	http://www.genecards.org/cgi-bin/carddisp.pl?gene=ADAT1
Afg1l	AFG1 like ATPase	CG8520, Lac, Lace1	http://www.genecards.org/cgi-bin/carddisp.pl?gene=AFG1L
Agbl4	ATP/GTP binding protein-like 4	4930578N11Rik, 4931433A01Rik, Ccp	http://www.genecards.org/cgi-bin/carddisp.pl?gene=AGBL4
Alg1	asparagine-linked glycosylation 1 (beta-1,4-mannosyltransferase)	HMAT, HMAT1, HMT1	http://www.genecards.org/cgi-bin/carddisp.pl?gene=ALG1
Alg12	asparagine-linked glycosylation 12 (alpha-1,6-mannosyltransferase)	ECM39	http://www.genecards.org/cgi-bin/carddisp.pl?gene=ALG12
Alkbh1	alkB homolog 1, histone H2A dioxygenase	2700073G19Rik, Abh, Alk, Alkbh, al, alkB, hABH	http://www.genecards.org/cgi-bin/carddisp.pl?gene=ALKBH1
Ammecr1	Alport syndrome, mental retardation, midface hypoplasia and elliptocytosis chromosomal region gene 1	6230420G18Rik	http://www.genecards.org/cgi-bin/carddisp.pl?gene=AMMECR1
Amt	aminomethyltransferase	EG434437, GCVT	http://www.genecards.org/cgi-bin/carddisp.pl?gene=AMT
Ankrd17	ankyrin repeat domain 17	4933425K22Rik, A130069E23Rik, A930008M01, AA407558, AA516750, AU040470, Foe, Gt, Gtar, Mask, mKIAA0697	http://www.genecards.org/cgi-bin/carddisp.pl?gene=ANKRD17
Arf3	ADP-ribosylation factor 3	5430400P17Rik, AI854770	http://www.genecards.org/cgi-bin/carddisp.pl?gene=ARF3
Asf1a	anti-silencing function 1A histone chaperone	2310079C17Rik, C79052	http://www.genecards.org/cgi-bin/carddisp.pl?gene=ASF1A
Aspm	abnormal spindle microtubule assembly	A, Calm, Calmbp1, D330028K02Rik, MCPH, MCPH5, Sh, Sha1	http://www.genecards.org/cgi-bin/carddisp.pl?gene=ASPM
Atad5	ATPase family, AAA domain containing 5	C130052G03Rik, FRAG1, Gm17	http://www.genecards.org/cgi-bin/carddisp.pl?gene=ATAD5
Atg10	autophagy related 10	5330424L23Rik, 5430428K15Rik, AI852123, APG10, Agp10, Apg, Apg10l, Apg10p, Atg10l	http://www.genecards.org/cgi-bin/carddisp.pl?gene=ATG10
Atp13a3	ATPase type 13A3	AU022875, Gm1745, Gm541, Gm542	http://www.genecards.org/cgi-bin/carddisp.pl?gene=ATP13A3
Atpaf1	ATP synthase mitochondrial F1 complex assembly factor 1	6330547J17Rik, AI593252, ATP, ATP11, ATP11p	http://www.genecards.org/cgi-bin/carddisp.pl?gene=ATPAF1
Aup1	ancient ubiquitous protein 1	AA589454	http://www.genecards.org/cgi-bin/carddisp.pl?gene=AUP1
B3galt5	UDP-Gal:betaGlcNAc beta 1,3-galactosyltransferase, polypeptide 5	1190002B21Rik, AU045265, b3Gal, b3Galt-V	http://www.genecards.org/cgi-bin/carddisp.pl?gene=B3GALT5
B4gat1	beta-1,4-glucuronyltransferase 1	1500032M01Rik, B3gnt1, B3gnt6, BETA3GNT1, iGAT, iGNT	http://www.genecards.org/cgi-bin/carddisp.pl?gene=B4GAT1
Babam1	BRISC and BRCA1 A complex member 1	5430437P03Rik, Merit40	http://www.genecards.org/cgi-bin/carddisp.pl?gene=BABAM1
Bcl2	B cell leukemia/lymphoma 2	AW986256, Bcl-, Bcl-2, C430015F12Rik, D630044D05Rik, D830018M01Rik	http://www.genecards.org/cgi-bin/carddisp.pl?gene=BCL2
Bod1	biorientation of chromosomes in cell division 1	2310022M17Rik, BOD2., BOD2.1, Bod, Bodq, Bodq1, Fam44b	http://www.genecards.org/cgi-bin/carddisp.pl?gene=BOD1
Brf1	BRF1, RNA polymerase III transcription initiation factor 90 kDa subunit	2510002F24Rik, GTF3B, TAF3, TAF3C, TAFI, TAFIII90, TFIII, TFIIIB90, mTFIIIB90	http://www.genecards.org/cgi-bin/carddisp.pl?gene=BRF1
Bub1	BUB1, mitotic checkpoint serine/threonine kinase	AL022991, Bub1a, C80208, D2Xrf8, D2Xrf87	http://www.genecards.org/cgi-bin/carddisp.pl?gene=BUB1
Cactin	cactin, spliceosome C complex subunit	2510012J08Rik	http://www.genecards.org/cgi-bin/carddisp.pl?gene=CACTIN
Ccdc138	coiled-coil domain containing 138	6230424H07Rik, BC042726	http://www.genecards.org/cgi-bin/carddisp.pl?gene=CCDC138
Ccdc178	coiled coil domain containing 178	4921528I01Rik	http://www.genecards.org/cgi-bin/carddisp.pl?gene=CCDC178
Cct2	chaperonin containing Tcp1, subunit 2 (beta)	Cctb	http://www.genecards.org/cgi-bin/carddisp.pl?gene=CCT2
Cct5	chaperonin containing Tcp1, subunit 5 (epsilon)	CCT-epsilon, Ccte, TCP, TCP-1-epsilon, TCPE, mKIAA0098	http://www.genecards.org/cgi-bin/carddisp.pl?gene=CCT5
Cdk19	cyclin-dependent kinase 19	2700084L06Rik, AI845279, AW228747, CDK11, Cdc2l, Cdc2l6, mKIAA1028	http://www.genecards.org/cgi-bin/carddisp.pl?gene=CDK19
Cenpe	centromere protein E	312kD, 312kDa, AU019344, BC049989, C530022J18, CENP, CENP-E, Kif1, Kif10	http://www.genecards.org/cgi-bin/carddisp.pl?gene=CENPE
Cep112	centrosomal protein 112	1700001M19Rik, 1700029K01Rik, 8430407H02Rik, AV043680, AV207351, Ccdc46, Mac, Macoco	http://www.genecards.org/cgi-bin/carddisp.pl?gene=CEP112
Cep164	centrosomal protein 164	AI450905, BC027092, D030051D21	http://www.genecards.org/cgi-bin/carddisp.pl?gene=CEP164
Cers6	ceramide synthase 6	4732462C07Rik, AW544719, Cer, L, Lass6, T1, T1L	http://www.genecards.org/cgi-bin/carddisp.pl?gene=CERS6
Chek1	checkpoint kinase 1	C85740, Chk1, rad27	http://www.genecards.org/cgi-bin/carddisp.pl?gene=CHEK1
Chmp2b	charged multivesicular body protein 2B	1190006E07Rik	http://www.genecards.org/cgi-bin/carddisp.pl?gene=CHMP2B
Chst1	carbohydrate sulfotransferase 1	2610008E20Rik, AW125896, C6S, C6ST, GST-, GST-1, Gst1, KS6ST, KSGA, KSGAL6ST, KSST	http://www.genecards.org/cgi-bin/carddisp.pl?gene=CHST1
Cit	citron	C030025P15Rik, CRIK, CRIK-SK, Cit-, Cit-k	http://www.genecards.org/cgi-bin/carddisp.pl?gene=CIT
Ckap2	cytoskeleton associated protein 2	AI461656, AW228814, LB, LB1	http://www.genecards.org/cgi-bin/carddisp.pl?gene=CKAP2
Ckm	creatine kinase, muscle	CPK-M, Ckmm, M-CK, MCK	http://www.genecards.org/cgi-bin/carddisp.pl?gene=CKM
Clpp	caseinolytic mitochondrial matrix peptidase proteolytic subunit	AU019820, D17Wsu160, D17Wsu160e	http://www.genecards.org/cgi-bin/carddisp.pl?gene=CLPP
Cnot7	CCR4-NOT transcription complex, subunit 7	AU022737, CAF-1, Caf, Caf1, Pop2	http://www.genecards.org/cgi-bin/carddisp.pl?gene=CNOT7
Cnpy2	canopy FGF signaling regulator 2	5330432A10Rik, AW229003, D10Bwg1546e, Tmem4, Zsi, Zsig9	http://www.genecards.org/cgi-bin/carddisp.pl?gene=CNPY2
Coa8	cytochrome c oxidase assembly factor 8	1700081D05Rik, 2810002N01Rik, Ap, Apop-1, Apop1, Apopt1	http://www.genecards.org/cgi-bin/carddisp.pl?gene=COA8
Cops5	COP9 signalosome subunit 5	AI303502, CS, CSN5, Jab, Jab1, Mov34, Sg, Sgn5	http://www.genecards.org/cgi-bin/carddisp.pl?gene=COPS5
Coq8a	coenzyme Q8A	4632432J16Rik, AI462003, Adck, Adck3, Cabc, Cabc1, mKIAA0451	http://www.genecards.org/cgi-bin/carddisp.pl?gene=COQ8A
Cox11	cytochrome c oxidase assembly protein 11, copper chaperone	2010004I09Rik	http://www.genecards.org/cgi-bin/carddisp.pl?gene=COX11
Cox6b1	cytochrome c oxidase, subunit 6B1	2010000G05Rik, COX VIb-1, Cox6b	http://www.genecards.org/cgi-bin/carddisp.pl?gene=COX6B1
Ctu1	cytosolic thiouridylase subunit 1	Atpb, Atpbd3, BC005752	http://www.genecards.org/cgi-bin/carddisp.pl?gene=CTU1
Cyfip1	cytoplasmic FMR1 interacting protein 1	E030028J09Rik, P140S, P140SRA-1, P140sra1, Shy, Shyc, Sr, Sra-1, Sra1, l(7), l(7)1Rl, l7, l71Rl, l7Rl1, mKIAA0068, pl, pl-1	http://www.genecards.org/cgi-bin/carddisp.pl?gene=CYFIP1
Ddrgk1	DDRGK domain containing 1	1110001I20Rik, 2600009E05Rik, AI326138, Ufbp1	http://www.genecards.org/cgi-bin/carddisp.pl?gene=DDRGK1
Ddx19a	DEAD box helicase 19a	DBP, DBP5, Ddx19, Eif4a, Eif4a-rs1	http://www.genecards.org/cgi-bin/carddisp.pl?gene=DDX19A
Ddx41	DEAD box helicase 41	2900024F02Rik, AA958953, ABS, AI324246	http://www.genecards.org/cgi-bin/carddisp.pl?gene=DDX41
Ddx56	DEAD box helicase 56	2600001H07Rik, D11Ertd619, D11Ertd619e, NOH, Noh61	http://www.genecards.org/cgi-bin/carddisp.pl?gene=DDX56
Denr	density-regulated protein	1500003K04Rik	http://www.genecards.org/cgi-bin/carddisp.pl?gene=DENR
Dlst	dihydrolipoamide S-succinyltransferase (E2 component of 2-oxo-glutarate complex)	1600017E01Rik, 4632413C10Rik, 4930529O08Rik, DLTS	http://www.genecards.org/cgi-bin/carddisp.pl?gene=DLST
Dnaaf5	dynein, axonemal assembly factor 5	BC053401, C76907, Heat, Heatr2	http://www.genecards.org/cgi-bin/carddisp.pl?gene=DNAAF5
Dnaja3	DnaJ heat shock protein family (Hsp40) member A3	1200003J13Rik, 1810053A11Rik, C81173, Tid-, Tid-1, Tid1l	http://www.genecards.org/cgi-bin/carddisp.pl?gene=DNAJA3
Dnajc2	DnaJ heat shock protein family (Hsp40) member C2	AU020218, MID, MIDA1, Zrf, Zrf1, Zrf2	http://www.genecards.org/cgi-bin/carddisp.pl?gene=DNAJC2
Dnal4	dynein, axonemal, light chain 4	D15Ertd424, D15Ertd424e, Dna, Dnalc4	http://www.genecards.org/cgi-bin/carddisp.pl?gene=DNAL4
Dohh	deoxyhypusine hydroxylase/monooxygenase	1110033C18Rik, AI585913, AL022869, Hlr, Hlrc1	http://www.genecards.org/cgi-bin/carddisp.pl?gene=DOHH
Dph5	diphthamide biosynthesis 5	2410012M04Rik, AU045680, C80186	http://www.genecards.org/cgi-bin/carddisp.pl?gene=DPH5
Dpyd	dihydropyrimidine dehydrogenase	AI315208, DHPDHase, DP, DPD, E330028L06Rik	http://www.genecards.org/cgi-bin/carddisp.pl?gene=DPYD
Dram2	DNA-damage regulated autophagy modulator 2	2010305N14Rik, 2610318G18Rik, AI647667, Tmem77	http://www.genecards.org/cgi-bin/carddisp.pl?gene=DRAM2
Dus3l	dihydrouridine synthase 3-like (S. cerevisiae)	AI662135, AW557805	http://www.genecards.org/cgi-bin/carddisp.pl?gene=DUS3L
Eef1e1	eukaryotic translation elongation factor 1 epsilon 1	1110003A02Rik, AI, AIMP3	http://www.genecards.org/cgi-bin/carddisp.pl?gene=EEF1E1
Eif1ad	eukaryotic translation initiation factor 1A domain containing	2010003J03Rik, AI131644, Eif1ad1	http://www.genecards.org/cgi-bin/carddisp.pl?gene=EIF1AD
Eif4e2	eukaryotic translation initiation factor 4E member 2	2700069E09Rik, AI036339, AV129531, D0H0S6743, D0H0S6743E, Eif4e, Eif4el3	http://www.genecards.org/cgi-bin/carddisp.pl?gene=EIF4E2
Eif4ebp1	eukaryotic translation initiation factor 4E binding protein 1	4e-bp, 4e-bp1, AA959816, PH, PHAS-I	http://www.genecards.org/cgi-bin/carddisp.pl?gene=EIF4EBP1
Elp2	elongator acetyltransferase complex subunit 2	AU023723, Epl2, St, StIP1, Sta, Statip1	http://www.genecards.org/cgi-bin/carddisp.pl?gene=ELP2
Elp6	elongator acetyltransferase complex subunit 6	2610001P13Rik, 2610002I17Rik, AV159994, Tmem103	http://www.genecards.org/cgi-bin/carddisp.pl?gene=ELP6
Eno1	enolase 1, alpha non-neuron	AL022784, Eno, Eno-1, MBP-1, NNE	http://www.genecards.org/cgi-bin/carddisp.pl?gene=ENO1
Eri3	exoribonuclease 3	P, PI, PINT1, Prnpip1	http://www.genecards.org/cgi-bin/carddisp.pl?gene=ERI3
Erp44	endoplasmic reticulum protein 44	1110001E24Rik, AI849526, AL033348, Txndc, Txndc4	http://www.genecards.org/cgi-bin/carddisp.pl?gene=ERP44
Etfb	electron transferring flavoprotein, beta polypeptide	0610009I16Rik, 2810441H06Rik	http://www.genecards.org/cgi-bin/carddisp.pl?gene=ETFB
Etfdh	electron transferring flavoprotein, dehydrogenase	0610010I20Rik, AV001013	http://www.genecards.org/cgi-bin/carddisp.pl?gene=ETFDH
Exoc4	exocyst complex component 4	C78892, Sec, Sec8, Sec8l1	http://www.genecards.org/cgi-bin/carddisp.pl?gene=EXOC4
Exoc5	exocyst complex component 5	AI447711, AI448003, Gm76, PRO1, PRO1912, SEC1, SEC10, Sec10l1	http://www.genecards.org/cgi-bin/carddisp.pl?gene=EXOC5
Exosc3	exosome component 3	2310005D06Rik, AI593501, Rrp40	http://www.genecards.org/cgi-bin/carddisp.pl?gene=EXOSC3
Fam3c	FAM3 metabolism regulating signaling molecule C	D6Wsu176, D6Wsu176e, Fam3, Ilei	http://www.genecards.org/cgi-bin/carddisp.pl?gene=FAM3C
Fars2	phenylalanine-tRNA synthetase 2 (mitochondrial)	Fa, Fars1, pheRS	http://www.genecards.org/cgi-bin/carddisp.pl?gene=FARS2
Fen1	flap structure specific endonuclease 1	AW538437, FEN-1	http://www.genecards.org/cgi-bin/carddisp.pl?gene=FEN1
Fundc1	FUN14 domain containing 1	1500005J14Rik, 1810033P05Rik	http://www.genecards.org/cgi-bin/carddisp.pl?gene=FUNDC1
Fut9	fucosyltransferase 9	AI746471, AU067636, mFUT9, mFuc-TI, mFuc-TIX	http://www.genecards.org/cgi-bin/carddisp.pl?gene=FUT9
Ganab	alpha glucosidase 2 alpha neutral subunit	AU042638, G2, G2an, Gl, GluII, mKIAA0088	http://www.genecards.org/cgi-bin/carddisp.pl?gene=GANAB
Gatm	glycine amidinotransferase (L-arginine:glycine amidinotransferase)	1810003P21Rik, AI314789, AT	http://www.genecards.org/cgi-bin/carddisp.pl?gene=GATM
Ggcx	gamma-glutamyl carboxylase		http://www.genecards.org/cgi-bin/carddisp.pl?gene=GGCX
Ggnbp2	gametogenetin binding protein 2	AI451896, C75939, D330017P12Rik, DIF-, DIF-3, Zfp40, Zfp403	http://www.genecards.org/cgi-bin/carddisp.pl?gene=GGNBP2
Ggt1	gamma-glutamyltransferase 1	CD224, GGT, GGT 1, GGT-1, Ggtp, dwg	http://www.genecards.org/cgi-bin/carddisp.pl?gene=GGT1
Gnpnat1	glucosamine-phosphate N-acetyltransferase 1	AU017428, AU040593, EMeg32, Gpnat1, Gsnpat	http://www.genecards.org/cgi-bin/carddisp.pl?gene=GNPNAT1
Gpam	glycerol-3-phosphate acyltransferase, mitochondrial	GPA, GPAT, GPAT-1, GPAT1, P90	http://www.genecards.org/cgi-bin/carddisp.pl?gene=GPAM
Gpcpd1	glycerophosphocholine phosphodiesterase 1	2310004G06Rik, 2310032D16Rik, AU015213, Gde5, Pr, Prei4, mKIAA1434	http://www.genecards.org/cgi-bin/carddisp.pl?gene=GPCPD1
Gtf2h4	general transcription factor II H, polypeptide 4	AW545633, BTF2 p52, p5, p52	http://www.genecards.org/cgi-bin/carddisp.pl?gene=GTF2H4
Gtf3c2	general transcription factor IIIC, polypeptide 2, beta	1300004C11Rik, 2610510G03Rik, AI225816, AU041069, TFIIIC, TFIIIC-, TFIIIC110, mKIAA0011	http://www.genecards.org/cgi-bin/carddisp.pl?gene=GTF3C2
Guk1	guanylate kinase 1	AA409738, AL033299, AL033300, AV026611, Gmk, Guk-1	http://www.genecards.org/cgi-bin/carddisp.pl?gene=GUK1
Hfm1	HFM1, ATP-dependent DNA helicase homolog	A330009G12Rik, Gm1046, Mer, Mer3, Sec63d, Sec63d1	http://www.genecards.org/cgi-bin/carddisp.pl?gene=HFM1
Hhat	hedgehog acyltransferase	2810432O22Rik, AI462858, AP-2, AP-2CRE, S, Skn, Tg(TFAP2A-cre)1Will	http://www.genecards.org/cgi-bin/carddisp.pl?gene=HHAT
Hinfp	histone H4 transcription factor	AA589481, HiNF-P, Miz, Mizf	http://www.genecards.org/cgi-bin/carddisp.pl?gene=HINFP
Hmcn1	hemicentin 1	EG545370, FIBL-6, Gm201	http://www.genecards.org/cgi-bin/carddisp.pl?gene=HMCN1
Hspa5	heat shock protein 5	78kD, AL022860, AU019543, B, Bip, D2Wsu141, D2Wsu141e, D2Wsu17, D2Wsu17e, Grp, Grp78, Hsce7, Hsce70, SEZ-7, Sez, Sez7, baffl, baffled, mB, mBiP	http://www.genecards.org/cgi-bin/carddisp.pl?gene=HSPA5
Hspd1	heat shock protein 1 (chaperonin)	60kDa, CPN60, HSP-60, HSP-65, Hsp, Hsp60	http://www.genecards.org/cgi-bin/carddisp.pl?gene=HSPD1
Idh3g	isocitrate dehydrogenase 3 (NAD+), gamma		http://www.genecards.org/cgi-bin/carddisp.pl?gene=IDH3G
Ift46	intraflagellar transport 46	1500035H01Rik, AA408110, AI663846, IFT4, R75047, c11orf2	http://www.genecards.org/cgi-bin/carddisp.pl?gene=IFT46
Immp1l	IMP1 inner mitochondrial membrane peptidase-like (S. cerevisiae)	1500034J20Rik, 2610528O17Rik, AU042386	http://www.genecards.org/cgi-bin/carddisp.pl?gene=IMMP1L
Imp4	IMP4, U3 small nucleolar ribonucleoprotein	AA409888, AV031295, D1Wsu40e	http://www.genecards.org/cgi-bin/carddisp.pl?gene=IMP4
Ing5	inhibitor of growth family, member 5	1700001C14Rik, 1700027H23Rik, 1810018M11Rik, AI225768	http://www.genecards.org/cgi-bin/carddisp.pl?gene=ING5
Ints10	integrator complex subunit 10	4921521J11Rik, AI462004	http://www.genecards.org/cgi-bin/carddisp.pl?gene=INTS10
Ipo7	importin 7	A330055O14Rik, C330016G14, Im, Imp7, Ra, Ranbp7	http://www.genecards.org/cgi-bin/carddisp.pl?gene=IPO7
Itga11	integrin alpha 11	4732459H24Rik	http://www.genecards.org/cgi-bin/carddisp.pl?gene=ITGA11
Kat8	K(lysine) acetyltransferase 8	2010203C02Rik, 5830450F21Rik, D7Ertd629, D7Ertd629e, MO, MOF, MYST-1, Myst, Myst1	http://www.genecards.org/cgi-bin/carddisp.pl?gene=KAT8
Kcnk13	potassium channel, subfamily K, member 13	BB085247, F730021E22Rik, Gm1570, Gm1685	http://www.genecards.org/cgi-bin/carddisp.pl?gene=KCNK13
Kif15	kinesin family member 15	3110023M17Rik, 3930402I10Rik, D330038N01, HKL, HKLP2, Kn, Knsl7, b2b1117.1Clo, b2b1117.1aClo	http://www.genecards.org/cgi-bin/carddisp.pl?gene=KIF15
Kif23	kinesin family member 23	3110001D19Rik, C87313, CHO, CHO1, Kn, Knsl5, MKL, MKLP, MKLP-1, MKLP1	http://www.genecards.org/cgi-bin/carddisp.pl?gene=KIF23
Klhl20	kelch-like 20	AI504637, D930050H05Rik, Kleip, mKIAA4210	http://www.genecards.org/cgi-bin/carddisp.pl?gene=KLHL20
Klhl28	kelch-like 28	2810440N09Rik, 4122402F11Rik, 4931401E10Rik, Btbd5	http://www.genecards.org/cgi-bin/carddisp.pl?gene=KLHL28
Klhl9	kelch-like 9	8030469P05, C530050O22Rik, mKIAA1354	http://www.genecards.org/cgi-bin/carddisp.pl?gene=KLHL9
Kpna3	karyopherin (importin) alpha 3	I, IPOA4	http://www.genecards.org/cgi-bin/carddisp.pl?gene=KPNA3
Kti12	KTI12 homolog, chromatin associated	1110001A12Rik, AI326810, AU014758	http://www.genecards.org/cgi-bin/carddisp.pl?gene=KTI12
Lamtor1	late endosomal/lysosomal adaptor, MAPK and MTOR activator 1	2400001E08Rik, Pdro, p1, p18	http://www.genecards.org/cgi-bin/carddisp.pl?gene=LAMTOR1
Lkaaear1	LKAAEAR motif containing 1 (IKAAEAR murine motif)	4930526D03Rik, Gm692	http://www.genecards.org/cgi-bin/carddisp.pl?gene=LKAAEAR1
Lrrcc1	leucine rich repeat and coiled-coil domain containing 1	1200008A14Rik, 4932441F23Rik, AI195358, AI447421	http://www.genecards.org/cgi-bin/carddisp.pl?gene=LRRCC1
Lsm4	LSM4 homolog, U6 small nuclear RNA and mRNA degradation associated		http://www.genecards.org/cgi-bin/carddisp.pl?gene=LSM4
Ltbp4	latent transforming growth factor beta binding protein 4	2310046A13Rik	http://www.genecards.org/cgi-bin/carddisp.pl?gene=LTBP4
Lyrm9	LYR motif containing 9	1810012P15Rik	http://www.genecards.org/cgi-bin/carddisp.pl?gene=LYRM9
Mfge8	milk fat globule EGF and factor V/VIII domain containing	AA408458, AI325141, MFG-E8, MP47, Mfgm, P47, SED, SED1, lacta, lactadherin	http://www.genecards.org/cgi-bin/carddisp.pl?gene=MFGE8
Mfsd4b1	major facilitator superfamily domain containing 4B1	AI3173, AI317395, AI482555, Naglt1a	http://www.genecards.org/cgi-bin/carddisp.pl?gene=MFSD4B
Mlf1	myeloid leukemia factor 1	HL, HLS7	http://www.genecards.org/cgi-bin/carddisp.pl?gene=MLF1
Mlh1	mutL homolog 1	1110035C23Rik, AI317206, AI325952, AI561766	http://www.genecards.org/cgi-bin/carddisp.pl?gene=MLH1
Msh5	mutS homolog 5	Mut5	http://www.genecards.org/cgi-bin/carddisp.pl?gene=MSH5
Mtfmt	mitochondrial methionyl-tRNA formyltransferase	2310020P08Rik	http://www.genecards.org/cgi-bin/carddisp.pl?gene=MTFMT
Mthfs	5, 10-methenyltetrahydrofolate synthetase	1110034I12Rik, 2310020H23Rik, AI119695	http://www.genecards.org/cgi-bin/carddisp.pl?gene=MTHFS
Mto1	mitochondrial tRNA translation optimization 1	2310039H01Rik, 5730419A02Rik	http://www.genecards.org/cgi-bin/carddisp.pl?gene=MTO1
Nagk	N-acetylglucosamine kinase	Gnk	http://www.genecards.org/cgi-bin/carddisp.pl?gene=NAGK
Nars2	asparaginyl-tRNA synthetase 2 (mitochondrial)(putative)	AI875199	http://www.genecards.org/cgi-bin/carddisp.pl?gene=NARS2
Ncapg2	non-SMC condensin II complex, subunit G2	5830426I05Rik, CAP-G2, Luz, Luzp5, Mtb, mCAP-, mCAP-G2	http://www.genecards.org/cgi-bin/carddisp.pl?gene=NCAPG2
Ncaph	non-SMC condensin I complex, subunit H	A730011O11Rik, Br, Brrn1, CAP-H, HCAP, HCAP-H, mCAP-H	http://www.genecards.org/cgi-bin/carddisp.pl?gene=NCAPH
Ncaph2	non-SMC condensin II complex, subunit H2	D15Ertd785	http://www.genecards.org/cgi-bin/carddisp.pl?gene=NCAPH2
Ndufa12	NADH:ubiquinone oxidoreductase subunit A12	2410011G03Rik, AW112974, CI-B17.2, CIB17.2	http://www.genecards.org/cgi-bin/carddisp.pl?gene=NDUFA12
Ndufa7	NADH:ubiquinone oxidoreductase subunit A7	14.5kD, 14.5kDa, 2400007M02Rik, CI-B14.5a	http://www.genecards.org/cgi-bin/carddisp.pl?gene=NDUFA7
Ndufs4	NADH:ubiquinone oxidoreductase core subunit S4	6720411N02Rik, C1-18k	http://www.genecards.org/cgi-bin/carddisp.pl?gene=NDUFS4
Nfx1	nuclear transcription factor, X-box binding 1	1300017N15Rik, 3000003M19Rik, NFX.1, TEG-42, Tex42	http://www.genecards.org/cgi-bin/carddisp.pl?gene=NFX1
Nif3l1	Ngg1 interacting factor 3-like 1 (S. pombe)	1110030G24Rik	http://www.genecards.org/cgi-bin/carddisp.pl?gene=NIF3L1
Nop58	NOP58 ribonucleoprotein	M, MSSP, N, Nol5, SIK, nop5	http://www.genecards.org/cgi-bin/carddisp.pl?gene=NOP58
Nop9	NOP9 nucleolar protein	2610027L16Rik	http://www.genecards.org/cgi-bin/carddisp.pl?gene=NOP9
Nr1d2	nuclear receptor subfamily 1, group D, member 2	RVR, Rev-erb	http://www.genecards.org/cgi-bin/carddisp.pl?gene=NR1D2
Nubp2	nucleotide binding protein 2	D17Wsu11, D17Wsu11e	http://www.genecards.org/cgi-bin/carddisp.pl?gene=NUBP2
Odf2	outer dense fiber of sperm tails 2	AI848335, MMTEST2, MMTEST29, cene	http://www.genecards.org/cgi-bin/carddisp.pl?gene=ODF2
Ogdh	oxoglutarate (alpha-ketoglutarate) dehydrogenase (lipoamide)	2210403E04Rik, 2210412K19Rik, AA409584, d1401, mKIAA4192	http://www.genecards.org/cgi-bin/carddisp.pl?gene=OGDH
Ogfod2	2-oxoglutarate and iron-dependent oxygenase domain containing 2	1300006G11Rik, 5730405M13Rik, AU041636, AW552395	http://www.genecards.org/cgi-bin/carddisp.pl?gene=OGFOD2
Ostm1	osteopetrosis associated transmembrane protein 1	1200002H13Rik, HSPC0, HSPC019, g, gl	http://www.genecards.org/cgi-bin/carddisp.pl?gene=OSTM1
Otulin	OTU deubiquitinase with linear linkage specificity	C79097, Fam105, Fam105b, m3S, m3Sapc, m7-1S, m7-1Sapc	http://www.genecards.org/cgi-bin/carddisp.pl?gene=OTULIN
Oxa1l	oxidase assembly 1-like	1810020M02Rik, AI894287	http://www.genecards.org/cgi-bin/carddisp.pl?gene=OXA1L
Pa2g4	proliferation-associated 2G4	38kDa, AA672939, Ebp, Ebp1, P, Plfap	http://www.genecards.org/cgi-bin/carddisp.pl?gene=PA2G4
Pask	PAS domain containing serine/threonine kinase	P, mKIAA0135	http://www.genecards.org/cgi-bin/carddisp.pl?gene=PASK
Pcna	proliferating cell nuclear antigen		http://www.genecards.org/cgi-bin/carddisp.pl?gene=PCNA
Pde12	phosphodiesterase 12	2'-PDE, E430028B21Rik	http://www.genecards.org/cgi-bin/carddisp.pl?gene=PDE12
Pdxk	pyridoxal (pyridoxine, vitamin B6) kinase	2310036D04Rik, AA119688, C77999	http://www.genecards.org/cgi-bin/carddisp.pl?gene=PDXK
Pelo	pelota mRNA surveillance and ribosome rescue factor	AA409897, AI852218	http://www.genecards.org/cgi-bin/carddisp.pl?gene=PELO
Pes1	pescadillo ribosomal biogenesis factor 1		http://www.genecards.org/cgi-bin/carddisp.pl?gene=PES1
Pgbd5	piggyBac transposable element derived 5	2900019M05Rik, AI854313	http://www.genecards.org/cgi-bin/carddisp.pl?gene=PGBD5
Piwil2	piwi-like RNA-mediated gene silencing 2	Piwil1l, m, mili	http://www.genecards.org/cgi-bin/carddisp.pl?gene=PIWIL2
Pkdrej	polycystin (PKD) family receptor for egg jelly		http://www.genecards.org/cgi-bin/carddisp.pl?gene=PKDREJ
Pla2g1b	phospholipase A2, group IB, pancreas	P, Pla2a, sP, sPLA2IB	http://www.genecards.org/cgi-bin/carddisp.pl?gene=PLA2G1B
Plek2	pleckstrin 2		http://www.genecards.org/cgi-bin/carddisp.pl?gene=PLEK2
Pls3	plastin 3 (T-isoform)	AI115446, AL024105, T-fim	http://www.genecards.org/cgi-bin/carddisp.pl?gene=PLS3
Pnpla8	patatin-like phospholipase domain containing 8	1200006O19Rik, AI467579, Ipla2(gamma)	http://www.genecards.org/cgi-bin/carddisp.pl?gene=PNPLA8
Pold1	polymerase (DNA directed), delta 1, catalytic subunit	125kD, 125kDa	http://www.genecards.org/cgi-bin/carddisp.pl?gene=POLD1
Poldip3	polymerase (DNA-directed), delta interacting protein 3	1110008P04Rik, AA408269, AL022852, C77954, PDI, PDIP46, SKAR, mKIAA1649	http://www.genecards.org/cgi-bin/carddisp.pl?gene=POLDIP3
Pole2	polymerase (DNA directed), epsilon 2 (p59 subunit)		http://www.genecards.org/cgi-bin/carddisp.pl?gene=POLE2
Polr1c	polymerase (RNA) I polypeptide C	40kD, 40kDa, AA409007, AA959927, AL024089, Polr1e, RP, RPA40, Rpo, Rpo1-1	http://www.genecards.org/cgi-bin/carddisp.pl?gene=POLR1C
Polr2e	polymerase (RNA) II (DNA directed) polypeptide E	2410021N14Rik, 25kD, 25kDa, AW208866, RP, RPB5, XA, XAP4	http://www.genecards.org/cgi-bin/carddisp.pl?gene=POLR2E
Polr3c	polymerase (RNA) III (DNA directed) polypeptide C	4933407E01Rik, RP, RPC, RPC3, RPC62	http://www.genecards.org/cgi-bin/carddisp.pl?gene=POLR3C
Ppcdc	phosphopantothenoylcysteine decarboxylase	1810057I13Rik, 8430432M10Rik	http://www.genecards.org/cgi-bin/carddisp.pl?gene=PPCDC
Ppia	peptidylprolyl isomerase A	Cp, Cphn, Cy, CyP-1, CyP-18, CypA, SP18	http://www.genecards.org/cgi-bin/carddisp.pl?gene=PPIA
Ppil4	peptidylprolyl isomerase (cyclophilin)-like 4	3732410E19Rik, 3830425H19Rik, AI788954, AW146233, P, PPIase	http://www.genecards.org/cgi-bin/carddisp.pl?gene=PPIL4
Ppp2r1a	protein phosphatase 2, regulatory subunit A, alpha	6330556D22Rik, P, PP2A, PR, PR65	http://www.genecards.org/cgi-bin/carddisp.pl?gene=PPP2R1A
Ppp2r3d	protein phosphatase 2 (formerly 2A), regulatory subunit B'', delta	PP2A B''-PR59, PP2A PR59, PR, PR59, Pp, Ppp2r3, Ppp2r3a
Pradc1	protease-associated domain containing 1	1700040I03Rik, Pap21	http://www.genecards.org/cgi-bin/carddisp.pl?gene=PRADC1
Prc1	protein regulator of cytokinesis 1	D7Ertd348, D7Ertd348e	http://www.genecards.org/cgi-bin/carddisp.pl?gene=PRC1
Prkaca	protein kinase, cAMP dependent, catalytic, alpha	C, P, PKCD, Pk, Pkaca	http://www.genecards.org/cgi-bin/carddisp.pl?gene=PRKACA
Prkar2a	protein kinase, cAMP dependent regulatory, type II alpha	1110061A24Rik, AI317181, AI836829, RII, RII(alpha)	http://www.genecards.org/cgi-bin/carddisp.pl?gene=PRKAR2A
Prpf3	pre-mRNA processing factor 3	3632413F13Rik	http://www.genecards.org/cgi-bin/carddisp.pl?gene=PRPF3
Prpf38b	PRP38 pre-mRNA processing factor 38 (yeast) domain containing B	1110021E09Rik, AU018955	http://www.genecards.org/cgi-bin/carddisp.pl?gene=PRPF38B
Prpf4	pre-mRNA processing factor 4	1600015H11Rik, AI874830, AW047464, bN189G18.1	http://www.genecards.org/cgi-bin/carddisp.pl?gene=PRPF4
Prps1	phosphoribosyl pyrophosphate synthetase 1	2310010D17Rik, C76571, C76678, PRS-I, Pr, Prps-1	http://www.genecards.org/cgi-bin/carddisp.pl?gene=PRPS1
Psap	prosaposin	AI037048, SGP, SGP-1	http://www.genecards.org/cgi-bin/carddisp.pl?gene=PSAP
Psmd4	proteasome (prosome, macropain) 26S subunit, non-ATPase, 4	Af, Af1, Mcb1, ang, angiocidin	http://www.genecards.org/cgi-bin/carddisp.pl?gene=PSMD4
Psmd9	proteasome (prosome, macropain) 26S subunit, non-ATPase, 9	1500011J20Rik, 2610202L11Rik, Bridge, Bridge-1, P2, P27	http://www.genecards.org/cgi-bin/carddisp.pl?gene=PSMD9
Ptgs2	prostaglandin-endoperoxide synthase 2	COX, COX2, Cox-, Cox-2, PES-2, PGHS, PGHS-2, PHS, PHS II, PHS-2, Pgh, Pghs2, TIS10, Tis, gripghs	http://www.genecards.org/cgi-bin/carddisp.pl?gene=PTGS2
Ptpre	protein tyrosine phosphatase, receptor type, E	PT, PTPe, PTPepsilon, RP, RPTPepsilon	http://www.genecards.org/cgi-bin/carddisp.pl?gene=PTPRE
Pycr1	pyrroline-5-carboxylate reductase 1	P5CR 1, P5CR1	http://www.genecards.org/cgi-bin/carddisp.pl?gene=PYCR1
Rabepk	Rab9 effector protein with kelch motifs	8430412M01Rik, 9530020D24Rik, AV073337, C87311, Rab9p40	http://www.genecards.org/cgi-bin/carddisp.pl?gene=RABEPK
Rabif	RAB interacting factor	AI842864, AW549708, E130318E12Rik, MS, MSS4, RAS, RASGFR3	http://www.genecards.org/cgi-bin/carddisp.pl?gene=RABIF
Rad17	RAD17 checkpoint clamp loader component	MmRad, MmRad24	http://www.genecards.org/cgi-bin/carddisp.pl?gene=RAD17
Rangap1	RAN GTPase activating protein 1	C79654, Fug1, mKIAA1835	http://www.genecards.org/cgi-bin/carddisp.pl?gene=RANGAP1
Rars2	arginyl-tRNA synthetase 2, mitochondrial	1500002I10Rik, PRO1, PRO1992, Rarsl	http://www.genecards.org/cgi-bin/carddisp.pl?gene=RARS2
Rbm18	RNA binding motif protein 18	2010004P11Rik, AU015530	http://www.genecards.org/cgi-bin/carddisp.pl?gene=RBM18
Rbmx2	RNA binding motif protein, X-linked 2	2700089A17Rik, 2810411A03Rik, CGI-7, CGI-79	http://www.genecards.org/cgi-bin/carddisp.pl?gene=RBMX2
Reep5	receptor accessory protein 5	AI324241, AU022809, AW495741, DP1/TB, DP1/TB2, Dp, Dp1, R74856, TB2/DP, TB2/DP1	http://www.genecards.org/cgi-bin/carddisp.pl?gene=REEP5
Rexo2	RNA exonuclease 2	1810038D15Rik, AW107347, Rex, Rex2, S, Sfn, Sm, Smfn	http://www.genecards.org/cgi-bin/carddisp.pl?gene=REXO2
Riok3	RIO kinase 3	1200013N13Rik, D18Ertd331, D18Ertd331e, E130306C24Rik, Sud, Sudd	http://www.genecards.org/cgi-bin/carddisp.pl?gene=RIOK3
Riox1	ribosomal oxygenase 1	2410016O06Rik, MAPJD, NO, NO66	http://www.genecards.org/cgi-bin/carddisp.pl?gene=RIOX1
Rnf168	ring finger protein 168	3110001H15Rik	http://www.genecards.org/cgi-bin/carddisp.pl?gene=RNF168
Rnf8	ring finger protein 8	3830404E21Rik, AI, AIP37, laXp180	http://www.genecards.org/cgi-bin/carddisp.pl?gene=RNF8
Rsl1d1	ribosomal L1 domain containing 1	2410005K20Rik, C76439, pBK1	http://www.genecards.org/cgi-bin/carddisp.pl?gene=RSL1D1
Rtf1	RTF1, Paf1/RNA polymerase II complex component	2900005O08Rik, 6530416A09Rik, AI853581, AU043144, AW553985, Gtl, Gtl7, cbp82	http://www.genecards.org/cgi-bin/carddisp.pl?gene=RTF1
Rtn4r	reticulon 4 receptor	N, NOGOR, Ng, NgR, NgR1	http://www.genecards.org/cgi-bin/carddisp.pl?gene=RTN4R
Scfd1	Sec1 family domain containing 1	3110021P21Rik, RA4, RA410, STXBP, STXBP1L2	http://www.genecards.org/cgi-bin/carddisp.pl?gene=SCFD1
Sdhc	succinate dehydrogenase complex, subunit C, integral membrane protein	0610010E03Rik, AI316496, AU019277	http://www.genecards.org/cgi-bin/carddisp.pl?gene=SDHC
Selp	selectin, platelet	CD62, CD62P, GMP-140, Gr, Grmp, LECAM3, P-sel, PADGEM	http://www.genecards.org/cgi-bin/carddisp.pl?gene=SELP
Sgta	small glutamine-rich tetratricopeptide repeat (TPR)-containing, alpha	5330427H01Rik, AI194281, D10Ertd190, D10Ertd190e, Sg, Sgt, Stg	http://www.genecards.org/cgi-bin/carddisp.pl?gene=SGTA
Shcbp1l	Shc SH2-domain binding protein 1-like	1700012A16Rik	http://www.genecards.org/cgi-bin/carddisp.pl?gene=SHCBP1L
Ska1	spindle and kinetochore associated complex subunit 1	2810433K01Rik, AV117428	http://www.genecards.org/cgi-bin/carddisp.pl?gene=SKA1
Slc10a7	solute carrier family 10 (sodium/bile acid cotransporter family), member 7	2410193C02Rik, P7	http://www.genecards.org/cgi-bin/carddisp.pl?gene=SLC10A7
Slc17a5	solute carrier family 17 (anion/sugar transporter), member 5	4631416G20Rik, 4732491M05, AST, ISSD, NSD, SD, SIALIN, SIASD, SLD	http://www.genecards.org/cgi-bin/carddisp.pl?gene=SLC17A5
Slc22a21	solute carrier family 22 (organic cation transporter), member 21	Oct, Octn3, Slc2, Slc22a9
Slc23a1	solute carrier family 23 (nucleobase transporters), member 1	D18Ucl, D18Ucla2, SVC, SVCT1, Slc2, Slc23a2, YS, YSPL3	http://www.genecards.org/cgi-bin/carddisp.pl?gene=SLC23A1
Slc24a3	solute carrier family 24 (sodium/potassium/calcium exchanger), member 3	NCKX, NCKX3	http://www.genecards.org/cgi-bin/carddisp.pl?gene=SLC24A3
Slc25a14	solute carrier family 25 (mitochondrial carrier, brain), member 14	BMCP, BMCP1, UCP, UCP5, UCP5L, UCP5S	http://www.genecards.org/cgi-bin/carddisp.pl?gene=SLC25A14
Slc25a22	solute carrier family 25 (mitochondrial carrier, glutamate), member 22	1300006L01Rik, AI060884, Gc1	http://www.genecards.org/cgi-bin/carddisp.pl?gene=SLC25A22
Slc25a3	solute carrier family 25 (mitochondrial carrier, phosphate carrier), member 3	5730556H19Rik, PTP, Ph, Phc	http://www.genecards.org/cgi-bin/carddisp.pl?gene=SLC25A3
Slc30a5	solute carrier family 30 (zinc transporter), member 5	1810010K08Rik, AF233321, ZNT5, ZTL, ZTL1, ZnT-, ZnT-5, Znt, Zntl1	http://www.genecards.org/cgi-bin/carddisp.pl?gene=SLC30A5
Slco4a1	solute carrier organic anion transporter family, member 4a1	OAT, OATP-E, Slc21, Slc21a12	http://www.genecards.org/cgi-bin/carddisp.pl?gene=SLCO4A1
Smarcad1	SWI/SNF-related, matrix-associated actin-dependent regulator of chromatin, subfamily a, containing DEAD/H box 1	AV081750, AW226546, D6P, D6Pas1, Etl, Etl1, etl-1, mKIAA1122	http://www.genecards.org/cgi-bin/carddisp.pl?gene=SMARCAD1
Smarcb1	SWI/SNF related, matrix associated, actin dependent regulator of chromatin, subfamily b, member 1	AU020204, Baf4, Baf47, I, Ini1, SNF5/INI1, Sn, Snf5	http://www.genecards.org/cgi-bin/carddisp.pl?gene=SMARCB1
Smc2	structural maintenance of chromosomes 2	5730502P04Rik, AI255214, AW545314, CAP, CAP-E, CAPE, Fin, Fin16, SMC-2, Smc2l1	http://www.genecards.org/cgi-bin/carddisp.pl?gene=SMC2
Smc3	structural maintenance of chromosomes 3	Bam, Bamacan, Csp, Cspg6, HCAP, Mmi, Mmip1, SMC-3, Smc, SmcD	http://www.genecards.org/cgi-bin/carddisp.pl?gene=SMC3
Smc4	structural maintenance of chromosomes 4	2500002A22Rik, C79747, SMC-4, Smc4l1	http://www.genecards.org/cgi-bin/carddisp.pl?gene=SMC4
Snx19	sorting nexin 19	3526401K03Rik, AI195321, AI848208, mKIAA0254	http://www.genecards.org/cgi-bin/carddisp.pl?gene=SNX19
Spdl1	spindle apparatus coiled-coil protein 1	1700018I02Rik, 2600001J17Rik, 2810049B11Rik, AA409762, Ccdc99	http://www.genecards.org/cgi-bin/carddisp.pl?gene=SPDL1
Spi1	spleen focus forming virus (SFFV) proviral integration oncogene	Dis, Dis-1, Dis1, PU., PU.1, Sf, Sfp, Sfpi-1, Sfpi1, Sp, Spi-1, Tcfpu, Tcfpu1, Tfpu., Tfpu.1	http://www.genecards.org/cgi-bin/carddisp.pl?gene=SPI1
Stip1	stress-induced phosphoprotein 1	H, Hop, ST, Sti1, p6, p60	http://www.genecards.org/cgi-bin/carddisp.pl?gene=STIP1
Stom	stomatin	Epb7., Epb7.2, sto	http://www.genecards.org/cgi-bin/carddisp.pl?gene=STOM
Stpg4	sperm tail PG rich repeat containing 4	1700011E24Rik, GSE	http://www.genecards.org/cgi-bin/carddisp.pl?gene=STPG4
Sucla2	succinate-Coenzyme A ligase, ADP-forming, beta subunit	4930547K18Rik, A-SCS, SCS-betaA	http://www.genecards.org/cgi-bin/carddisp.pl?gene=SUCLA2
Surf6	surfeit gene 6	D2Wsu129, D2Wsu129e, Surf, Surf-6	http://www.genecards.org/cgi-bin/carddisp.pl?gene=SURF6
Tbl2	transducin (beta)-like 2	C76179, WS-b, WS-bTRP	http://www.genecards.org/cgi-bin/carddisp.pl?gene=TBL2
Thoc7	THO complex 7	Nif3l1bp1	http://www.genecards.org/cgi-bin/carddisp.pl?gene=THOC7
Timm17b	translocase of inner mitochondrial membrane 17b	17kD, 17kDa, Sfc, Sfc3, mTim17, mTim17b	http://www.genecards.org/cgi-bin/carddisp.pl?gene=TIMM17B
Timm22	translocase of inner mitochondrial membrane 22	Tim22	http://www.genecards.org/cgi-bin/carddisp.pl?gene=TIMM22
Timm44	translocase of inner mitochondrial membrane 44	0710005E20Rik, D8Ertd118, D8Ertd118e, Mimt4, Mimt44, Tim4, Tim44	http://www.genecards.org/cgi-bin/carddisp.pl?gene=TIMM44
Tmem198	transmembrane protein 198	A230078I05Rik, Tmem198-1, Tmem198a	http://www.genecards.org/cgi-bin/carddisp.pl?gene=TMEM198
Tmem266	transmembrane protein 266	9630029F15, AI1180, AI118078, HVRP1	http://www.genecards.org/cgi-bin/carddisp.pl?gene=TMEM266
Tmem43	transmembrane protein 43	1200015A22Rik, LU, LUMA	http://www.genecards.org/cgi-bin/carddisp.pl?gene=TMEM43
Tmem87b	transmembrane protein 87B	2610301K12Rik, 2810431I02Rik, AU014804	http://www.genecards.org/cgi-bin/carddisp.pl?gene=TMEM87B
Tmprss15	transmembrane protease, serine 15	Entk, P, Prss7	http://www.genecards.org/cgi-bin/carddisp.pl?gene=TMPRSS15
Tmprss3	transmembrane protease, serine 3		http://www.genecards.org/cgi-bin/carddisp.pl?gene=TMPRSS3
Tmprss9	transmembrane protease, serine 9	Seras, Serase-1B	http://www.genecards.org/cgi-bin/carddisp.pl?gene=TMPRSS9
Tnn	tenascin N	TN-W, Tn, Tnw, tenas, tenascin-W	http://www.genecards.org/cgi-bin/carddisp.pl?gene=TNN
Topbp1	topoisomerase (DNA) II binding protein 1	1110031N14Rik, 2810429C13Rik, AI256758, D430026L04Rik, mKIAA0259	http://www.genecards.org/cgi-bin/carddisp.pl?gene=TOPBP1
Traip	TRAF-interacting protein	T, Trip	http://www.genecards.org/cgi-bin/carddisp.pl?gene=TRAIP
Trappc5	trafficking protein particle complex 5	4021401A16Rik, TRS, TRS31	http://www.genecards.org/cgi-bin/carddisp.pl?gene=TRAPPC5
Trip13	thyroid hormone receptor interactor 13	2410002G23Rik, D13Ertd328, D13Ertd328e	http://www.genecards.org/cgi-bin/carddisp.pl?gene=TRIP13
Trip4	thyroid hormone receptor interactor 4	4930558E03Rik, ASC, ASC-1, Asc1, BB191711	http://www.genecards.org/cgi-bin/carddisp.pl?gene=TRIP4
Trmt1	tRNA methyltransferase 1	6720406L13Rik, 6720477L24, D8Ertd812, D8Ertd812e	http://www.genecards.org/cgi-bin/carddisp.pl?gene=TRMT1
Tsn	translin	2610034C24Rik, AU040286, C3PO, TB-R, TB-RBP	http://www.genecards.org/cgi-bin/carddisp.pl?gene=TSN
Tufm	Tu translation elongation factor, mitochondrial	2300002G02Rik, C76308, C76389, EF-TuMT, EFTU	http://www.genecards.org/cgi-bin/carddisp.pl?gene=TUFM
Tyms	thymidylate synthase	T, Ts	http://www.genecards.org/cgi-bin/carddisp.pl?gene=TYMS
Ube2a	ubiquitin-conjugating enzyme E2A	HHR, HHR6A, HR, HR6A, Mhr6a	http://www.genecards.org/cgi-bin/carddisp.pl?gene=UBE2A
Ubxn11	UBX domain protein 11	4930506L07Rik, D4Bwg1540e, S, Soc, Soci, Ubxd5	http://www.genecards.org/cgi-bin/carddisp.pl?gene=UBXN11
Urod	uroporphyrinogen decarboxylase	AI323803, UPD, Uro, Uro-d	http://www.genecards.org/cgi-bin/carddisp.pl?gene=UROD
Uspl1	ubiquitin specific peptidase like 1	E430026A01Rik	http://www.genecards.org/cgi-bin/carddisp.pl?gene=USPL1
Utp18	UTP18 small subunit processome component	6230425C22Rik, 6430513M13, Wdr5, Wdr50	http://www.genecards.org/cgi-bin/carddisp.pl?gene=UTP18
Vps16	VSP16 CORVET/HOPS core subunit	1810074M16Rik, mVPS16	http://www.genecards.org/cgi-bin/carddisp.pl?gene=VPS16
Wdr75	WD repeat domain 75	1300003A18Rik, 2410118I19Rik, C77608	http://www.genecards.org/cgi-bin/carddisp.pl?gene=WDR75
Wdtc1	WD and tetratricopeptide repeats 1	Gm695, a, ad, adipose, adp	http://www.genecards.org/cgi-bin/carddisp.pl?gene=WDTC1
Zc3h14	zinc finger CCCH type containing 14	1010001P15Rik, 1700016A15Rik, 2700069A02Rik, AU014748	http://www.genecards.org/cgi-bin/carddisp.pl?gene=ZC3H14
Zfp26	zinc finger protein 26	5033428C05Rik, KRAB, KRAB15, Zfp-2, Zfp-26, Zfp7, Zfp70, Zfp81-, Zfp81-rs1, mKIAA4196, mkr-, mkr-3, mszf14, mszf52	http://www.genecards.org/cgi-bin/carddisp.pl?gene=ZNF778
Zfp62	zinc finger protein 62		http://www.genecards.org/cgi-bin/carddisp.pl?gene=ZFP62
Zfy1	zinc finger protein 1, Y-linked	Zfy-1, Zfy2
Znrf3	zinc and ring finger 3	Gm1167	http://www.genecards.org/cgi-bin/carddisp.pl?gene=ZNRF3

## Sheet: Early_Enriched pathways
GeneAnalytics - Pathway results			Prepared for: Tal Gordon (talgordon@mail.tau.ac.il)
			Date: 7/22/2021
Copyright © LifeMap Sciences, Inc.
Statistics:
# Identified genes	279
# Matched genes	142
# Matched entities	22
Matching score statistics:
# High score matches	10
# Med score matches	12
# Low score matches	0
Results
Score	SuperPath Name	# SuperPath Total Genes	# SuperPath Matched Genes	Matched Genes (Symbols)	Evidence URL
32.8926	Cell Cycle, Mitotic	622	31	SMC3, POLE2, NCAPG2, NCAPH2, KIF23, RNF8, PRKACA, NCAPH, SMC2, MLH1, ODF2, TOPBP1, RANGAP1, PSMD4, BUB1, RNF168, RAD17, PSMD9, TYMS, SKA1, BABAM1, CENPE, PCNA, CEP164, SMC4, MSH5, PPP2R1A, POLD1, SPDL1, FEN1, CHEK1	http://pathcards.genecards.org/card/cell_cycle_mitotic
19.2559	DNA Damage	296	16	SMC3, COPS5, DPYD, SMC2, MLH1, TOPBP1, RAD17, TYMS, UBE2A, BABAM1, CENPE, PCNA, SMC4, PPP2R1A, FEN1, CHEK1	http://pathcards.genecards.org/card/dna_damage
18.4561	Gene Expression	1835	47	LSM4, POLDIP3, ADAT1, WDR75, IMP4, PRPF4, RTF1, HSPD1, RARS2, MLH1, EXOSC3, TRMT1, MTO1, POLR3C, EEF1E1, NARS2, TOPBP1, POLR2E, PSMD4, BRF1, PRPF3, ING5, CTU1, TSN, PIWIL2, INTS10, LAMTOR1, EIF4EBP1, RAD17, GTF2H4, PSMD9, UTP18, GTF3C2, PES1, POLR1C, PCNA, ZNF778, FARS2, PPP2R1A, RIOK3, COX11, NOP58, THOC7, CNOT7, NR1D2, CHEK1, COX6B1	http://pathcards.genecards.org/card/gene_expression
16.9796	Metabolism	2628	59	ACSF3, ACOX3, PPCDC, OGDH, SLC23A1, ABHD4, DLST, ACOT7, AMT, PRKACA, GATM, ALG1, DPYD, ALG12, PNPLA8, ARF3, GANAB, PTGS2, ETFB, NAGK, EEF1E1, GUK1, PSMD4, NDUFS4, SUCLA2, SLC25A14, PLA2G1B, GGCX, GNPNAT1, PYCR1, SDHC, IDH3G, PSMD9, NUBP2, TYMS, GPAM, B3GALT5, NDUFA7, ENO1, PRPS1, PSAP, CERS6, PPP2R1A, UROD, ETFDH, CKM, POLD1, COX11, GGT1, CHST1, PRKAR2A, GPCPD1, PDXK, CDK19, B4GAT1, MTHFS, FUT9, …	http://pathcards.genecards.org/card/metabolism
16.3049	Aurora B Signaling	39	6	KIF23, NCAPH, SMC2, KLHL9, BUB1, SMC4	http://pathcards.genecards.org/card/aurora_b_signaling
16.1361	Mitotic Prometaphase	139	10	SMC3, NCAPH, SMC2, RANGAP1, BUB1, SKA1, CENPE, SMC4, PPP2R1A, SPDL1	http://pathcards.genecards.org/card/mitotic_prometaphase
15.9616	Carbon Metabolism	141	10	ACOX3, OGDH, DLST, AMT, SUCLA2, PYCR1, SDHC, IDH3G, ENO1, PRPS1	http://pathcards.genecards.org/card/carbon_metabolism
13.7714	Cell Cycle_Chromosome Condensation in Prometaphase	33	5	NCAPG2, NCAPH2, NCAPH, SMC2, SMC4	http://pathcards.genecards.org/card/cell_cycle_chromosome_condensation_in_prometaphase
13.4715	Metabolism of Proteins	1624	39	SMC3, TIMM22, TIMM44, OTULIN, TIMM17B, ALG1, RTF1, SLC17A5, ALG12, HSPD1, DPH5, ARF3, EXOC4, EXOSC3, GANAB, ETFB, NAGK, MFGE8, RANGAP1, PSMD4, EXOC5, SLC30A5, RNF168, GGCX, GNPNAT1, IDH3G, EIF4EBP1, PSMD9, UBE2A, BABAM1, PCNA, SCFD1, DOHH, CCT5, TRAPPC5, NOP58, B4GAT1, CCT2, HSPA5	http://pathcards.genecards.org/card/metabolism_of_proteins
13.375	DNA Double-Strand Break Repair	329	14	POLE2, COPS5, RNF8, MLH1, TOPBP1, POLR2E, RNF168, RAD17, GTF2H4, BABAM1, PCNA, POLD1, FEN1, CHEK1	http://pathcards.genecards.org/card/dna_double-strand_break_repair
13.0178	E2F Mediated Regulation of DNA Replication	85	7	POLE2, RAD17, TYMS, PCNA, PPP2R1A, POLD1, CHEK1	http://pathcards.genecards.org/card/e2f_mediated_regulation_of_dna_replication
12.7135	Retinoblastoma (RB) in Cancer	88	7	SMC3, POLE2, RABIF, SMC2, TYMS, PCNA, CHEK1	http://pathcards.genecards.org/card/retinoblastoma_(rb)_in_cancer
11.7109	Citrate Cycle (TCA Cycle)	45	5	OGDH, DLST, SUCLA2, SDHC, IDH3G	http://pathcards.genecards.org/card/citrate_cycle_(tca_cycle)
11.4958	Homologous DNA Pairing and Strand Exchange	72	6	POLE2, TOPBP1, RAD17, PCNA, POLD1, CHEK1	http://pathcards.genecards.org/card/homologous_dna_pairing_and_strand_exchange
11.1554	Pyruvate Metabolism and Citric Acid (TCA) Cycle	49	5	OGDH, DLST, SUCLA2, SDHC, IDH3G	http://pathcards.genecards.org/card/pyruvate_metabolism_and_citric_acid_(tca)_cycle
11.0223	Mismatch Repair	28	4	MLH1, PCNA, POLD1, FEN1	http://pathcards.genecards.org/card/mismatch_repair
10.8435	Mitotic Metaphase and Anaphase	180	9	SMC3, RANGAP1, PSMD4, BUB1, PSMD9, SKA1, CENPE, PPP2R1A, SPDL1	http://pathcards.genecards.org/card/mitotic_metaphase_and_anaphase
10.4102	RNA Polymerase III Transcription Initiation	55	5	POLR3C, POLR2E, BRF1, GTF3C2, POLR1C	http://pathcards.genecards.org/card/rna_polymerase_iii_transcription_initiation
10.2422	AMPK Enzyme Complex Pathway	153	8	SMARCB1, PRKACA, EIF4EBP1, SMARCAD1, CKM, COX11, PRKAR2A, COX6B1	http://pathcards.genecards.org/card/ampk_enzyme_complex_pathway
9.98577	Regulation of TP53 Activity	370	13	MLH1, TOPBP1, POLR2E, ING5, LAMTOR1, RAD17, GTF2H4, PCNA, PPP2R1A, COX11, CNOT7, CHEK1, COX6B1	http://pathcards.genecards.org/card/regulation_of_tp53_activity
9.82562	Respiratory Electron Transport, ATP Synthesis By Chemiosmotic Coupling, and Heat Production By Uncoupling Proteins.	471	15	OGDH, DLST, SMARCB1, PRKACA, ETFB, NDUFS4, SUCLA2, SLC25A14, SDHC, IDH3G, NDUFA7, ETFDH, COX11, NDUFA12, COX6B1	http://pathcards.genecards.org/card/respiratory_electron_transport_atp_synthesis_by_chemiosmotic_coupling_and_heat_production_by_uncoupling_proteins
9.64855	Mitochondrial Protein Import	62	5	TIMM22, TIMM44, TIMM17B, HSPD1, IDH3G	http://pathcards.genecards.org/card/mitochondrial_protein_import

## Sheet: Middle_Enriched gene Set
GeneAnalytics - Analysis Report			Prepared for: Tal Gordon (talgordon@mail.tau.ac.il)
			Date: 7/22/2021
Copyright © LifeMap Sciences, Inc.
Species	Mouse
Identified genes (65)
Symbol	Full Name	Aliases	GeneCards URL
Acsf2	acyl-CoA synthetase family member 2		http://www.genecards.org/cgi-bin/carddisp.pl?gene=ACSF2
Aebp1	AE binding protein 1	A, ACLP	http://www.genecards.org/cgi-bin/carddisp.pl?gene=AEBP1
Atoh8	atonal bHLH transcription factor 8	4933425C05Rik, Hath6, Math, Math6, bHLHa, bHLHa21, ok, okadin	http://www.genecards.org/cgi-bin/carddisp.pl?gene=ATOH8
B3galt1	UDP-Gal:betaGlcNAc beta 1,3-galactosyltransferase, polypeptide 1	beta3Gal-T1	http://www.genecards.org/cgi-bin/carddisp.pl?gene=B3GALT1
Casp1	caspase 1	Casp, IC, ICE, Il1, Il1bc	http://www.genecards.org/cgi-bin/carddisp.pl?gene=CASP1
Cby1	chibby family member 1, beta catenin antagonist	1110014P06Rik, CBY, PGEA, PGEA14, Pge, Pgea1, ar, arb1	http://www.genecards.org/cgi-bin/carddisp.pl?gene=CBY1
Cdh4	cadherin 4	AW120700, R-CAD, R-Ca, R-Cadh, Rc, Rcad	http://www.genecards.org/cgi-bin/carddisp.pl?gene=CDH4
Cntnap1	contactin associated protein-like 1	AI841080, C, Caspr, NC, NCP1, Nr, Nrxn4, p, p19, p190, sh, shm	http://www.genecards.org/cgi-bin/carddisp.pl?gene=CNTNAP1
Cntnap2	contactin associated protein-like 2	5430425M22Rik, Ca, Caspr2, mKIAA0868	http://www.genecards.org/cgi-bin/carddisp.pl?gene=CNTNAP2
Cpxm2	carboxypeptidase X 2 (M14 family)	4632435C11Rik, CPX-2, Cpx2	http://www.genecards.org/cgi-bin/carddisp.pl?gene=CPXM2
Crim1	cysteine rich transmembrane BMP regulator 1 (chordin like)	AU015004	http://www.genecards.org/cgi-bin/carddisp.pl?gene=CRIM1
Cyp2d10	cytochrome P450, family 2, subfamily d, polypeptide 10	AI303445, Cyp2, Cyp2d, P450-2, P450-2D
Edar	ectodysplasin-A receptor	ED1R, ED3, ED5, EDA-A1R, EDA3, dl	http://www.genecards.org/cgi-bin/carddisp.pl?gene=EDAR
Emx1	empty spiracles homeobox 1		http://www.genecards.org/cgi-bin/carddisp.pl?gene=EMX1
F11	coagulation factor XI	1600027G01Rik, AI503996, Cf11, FX, FXI, PTA	http://www.genecards.org/cgi-bin/carddisp.pl?gene=F11
Fibcd1	fibrinogen C domain containing 1	AI448887	http://www.genecards.org/cgi-bin/carddisp.pl?gene=FIBCD1
Fut4	fucosyltransferase 4	AI451562, CD15, F, FAL, FucT-, FucT-IV, LeX, SSE, SSEA-1, Ss, Ssea1	http://www.genecards.org/cgi-bin/carddisp.pl?gene=FUT4
Fut8	fucosyltransferase 8		http://www.genecards.org/cgi-bin/carddisp.pl?gene=FUT8
Fut9	fucosyltransferase 9	AI746471, AU067636, mFUT9, mFuc-TI, mFuc-TIX	http://www.genecards.org/cgi-bin/carddisp.pl?gene=FUT9
Gpc6	glypican 6		http://www.genecards.org/cgi-bin/carddisp.pl?gene=GPC6
Hgfac	hepatocyte growth factor activator	HGF, HGFA	http://www.genecards.org/cgi-bin/carddisp.pl?gene=HGFAC
Hmcn1	hemicentin 1	EG545370, FIBL-6, Gm201	http://www.genecards.org/cgi-bin/carddisp.pl?gene=HMCN1
Hs3st3a1	heparan sulfate (glucosamine) 3-O-sulfotransferase 3A1	3Os, 3Ost3a, Hs3st3a	http://www.genecards.org/cgi-bin/carddisp.pl?gene=HS3ST3A1
Il17b	interleukin 17B	1110006O16Rik, 1700006N07Rik, Zcyto, Zcyto7	http://www.genecards.org/cgi-bin/carddisp.pl?gene=IL17B
Itga6	integrin alpha 6	5033401O05Rik, AI115430, Cd49f, VLA-6	http://www.genecards.org/cgi-bin/carddisp.pl?gene=ITGA6
Itga8	integrin alpha 8	AI447669	http://www.genecards.org/cgi-bin/carddisp.pl?gene=ITGA8
Itih3	inter-alpha trypsin inhibitor, heavy chain 3	AW108094, ITI-HC3, In, Intin3, Itih, Itih-3	http://www.genecards.org/cgi-bin/carddisp.pl?gene=ITIH3
Klhl18	kelch-like 18	A930041K15, AW545966	http://www.genecards.org/cgi-bin/carddisp.pl?gene=KLHL18
Klhl24	kelch-like 24	1110046J11Rik, 4930429H24Rik, 6530402O20Rik, C85082	http://www.genecards.org/cgi-bin/carddisp.pl?gene=KLHL24
Lrp2	low density lipoprotein receptor-related protein 2	AI315343, AW536255, D230004K18Rik, Gp33, Gp330, Meg, Megalin, b2b1625.2Clo	http://www.genecards.org/cgi-bin/carddisp.pl?gene=LRP2
Lrp4	low density lipoprotein receptor-related protein 4	6430526J12Rik, D230026E03, Megf7, mdi, mdig	http://www.genecards.org/cgi-bin/carddisp.pl?gene=LRP4
Lrp6	low density lipoprotein receptor-related protein 6	C030016K15Rik, Cd, Gw, ska, ska26, ska<m26J, ska<m26Jus>, skax, skax26	http://www.genecards.org/cgi-bin/carddisp.pl?gene=LRP6
Masp1	mannan-binding lectin serine peptidase 1	AW048060, CCPII, Cr, Crarf, Masp1/3	http://www.genecards.org/cgi-bin/carddisp.pl?gene=MASP1
Masp2	mannan-binding lectin serine peptidase 2	MAS, MASP-2, MAp, MAp19	http://www.genecards.org/cgi-bin/carddisp.pl?gene=MASP2
Mmel1	membrane metallo-endopeptidase-like 1	Mel, Mell1, N, NEP2, NEP2(m), NEPII, NL-1, NL2, Ne, Nl1, S, SEP	http://www.genecards.org/cgi-bin/carddisp.pl?gene=MMEL1
Mpo	myeloperoxidase	mKIAA4033	http://www.genecards.org/cgi-bin/carddisp.pl?gene=MPO
Notch2	notch 2	AI853703, N, N2	http://www.genecards.org/cgi-bin/carddisp.pl?gene=NOTCH2
Notch3	notch 3	AW229011, N, N3, hpb, hpbk	http://www.genecards.org/cgi-bin/carddisp.pl?gene=NOTCH3
Nptx1	neuronal pentraxin 1	D11Bwg1004e, N, Np1	http://www.genecards.org/cgi-bin/carddisp.pl?gene=NPTX1
Oaz1	ornithine decarboxylase antizyme 1	AZ, AZ-, AZ-1, AZ1, Antiz, Antizyme, ODC-Az, Oaz	http://www.genecards.org/cgi-bin/carddisp.pl?gene=OAZ1
Olfml2b	olfactomedin-like 2B	1110018N05Rik, 4832415H08Rik, AI467542	http://www.genecards.org/cgi-bin/carddisp.pl?gene=OLFML2B
Plekha8	pleckstrin homology domain containing, family A (phosphoinositide binding specific) member 8	6330400G01, AA517676, BC052360, FA, Fapp-2, Fapp2	http://www.genecards.org/cgi-bin/carddisp.pl?gene=PLEKHA8
Prdm15	PR domain containing 15	C21orf83, E130018M06Rik, ORF62, Zfp29, Zfp298	http://www.genecards.org/cgi-bin/carddisp.pl?gene=PRDM15
Ptgs2	prostaglandin-endoperoxide synthase 2	COX, COX2, Cox-, Cox-2, PES-2, PGHS, PGHS-2, PHS, PHS II, PHS-2, Pgh, Pghs2, TIS10, Tis, gripghs	http://www.genecards.org/cgi-bin/carddisp.pl?gene=PTGS2
Ptprb	protein tyrosine phosphatase, receptor type, B	3230402H02Rik, C130094E24, Ptpz, Rptpb, VE-, VE-PTP, Veptp	http://www.genecards.org/cgi-bin/carddisp.pl?gene=PTPRB
Pxdn	peroxidasin	2310075M15Rik, C85409, E330004E07, V, VPO1, mKIAA0230	http://www.genecards.org/cgi-bin/carddisp.pl?gene=PXDN
Ripk2	receptor (TNFRSF)-interacting serine-threonine kinase 2	2210420D18Rik, CAR, CARD3, CARDIAK, CCK, D4Bwg0615e, R, RI, RICK, RIP2	http://www.genecards.org/cgi-bin/carddisp.pl?gene=RIPK2
Sfrp1	secreted frizzled-related protein 1	2210415K03Rik, AW011917, AW107218, AW742929, sFR, sFRP-1	http://www.genecards.org/cgi-bin/carddisp.pl?gene=SFRP1
Slitrk5	SLIT and NTRK-like family, member 5	2610019D03Rik	http://www.genecards.org/cgi-bin/carddisp.pl?gene=SLITRK5
Stox1	storkhead box 1	4732470K04Rik, Gm63	http://www.genecards.org/cgi-bin/carddisp.pl?gene=STOX1
Svep1	sushi, von Willebrand factor type A, EGF and pentraxin domain containing 1	1110021D17Rik, 4833413O10Rik, AA387071, D430029O09Rik, Pol, Polydom	http://www.genecards.org/cgi-bin/carddisp.pl?gene=SVEP1
Tecta	tectorin alpha	Tct, Tctna	http://www.genecards.org/cgi-bin/carddisp.pl?gene=TECTA
Tll2	tolloid-like 2		http://www.genecards.org/cgi-bin/carddisp.pl?gene=TLL2
Tmprss13	transmembrane protease, serine 13	BC010843, Tpmrss13	http://www.genecards.org/cgi-bin/carddisp.pl?gene=TMPRSS13
Tnn	tenascin N	TN-W, Tn, Tnw, tenas, tenascin-W	http://www.genecards.org/cgi-bin/carddisp.pl?gene=TNN
Tnr	tenascin R	J1-ten, J1-tenascin, TN, TN-R, ja, janusin, rest, restrictin	http://www.genecards.org/cgi-bin/carddisp.pl?gene=TNR
Tpm1	tropomyosin 1, alpha	AA986836, AI854628, TM2, TPM1kappa, Tm3, Tmpa, Tpm-, Tpm-1, alph, alpha-TM	http://www.genecards.org/cgi-bin/carddisp.pl?gene=TPM1
Ube2j2	ubiquitin-conjugating enzyme E2J 2	1200007B18Rik, 2400008G19Rik, 5730472G04Rik, AL022923, NCUBE-2, Ubc6, Ubc6p	http://www.genecards.org/cgi-bin/carddisp.pl?gene=UBE2J2
Umod	uromodulin	THP, Urehd, Urehd1, ureh, urehr4, uromu	http://www.genecards.org/cgi-bin/carddisp.pl?gene=UMOD
Unc45b	unc-45 myosin chaperone B	AA445617, Cmya, Cmya4, D230041A13Rik, UNC4, Unc45	http://www.genecards.org/cgi-bin/carddisp.pl?gene=UNC45B
Ust	uronyl-2-sulfotransferase	D930010O20Rik, UA2, UA2OST	http://www.genecards.org/cgi-bin/carddisp.pl?gene=UST
Vwa7	von Willebrand factor A domain containing 7	C6orf27, D17H6S56E-, D17H6S56E-3, G7c, NG37	http://www.genecards.org/cgi-bin/carddisp.pl?gene=VWA7
Vwc2	von Willebrand factor C domain containing 2	A930041G11Rik, B, G11, PSST739, UNQ739, cr, cradin	http://www.genecards.org/cgi-bin/carddisp.pl?gene=VWC2
Wfikkn1	WAP, FS, Ig, KU, and NTR-containing protein 1	Ga, Gasp2, Wfikkn	http://www.genecards.org/cgi-bin/carddisp.pl?gene=WFIKKN1
Xiap	X-linked inhibitor of apoptosis	1110015C02Rik, A, Aipa, Api3, Bir, Birc4, I, IAP3, IL, ILP-1, MIHA	http://www.genecards.org/cgi-bin/carddisp.pl?gene=XIAP

## Sheet: Middle_Enriched pathways
GeneAnalytics - Pathway results			Prepared for: Tal Gordon (talgordon@mail.tau.ac.il)
			Date: 7/22/2021
Copyright © LifeMap Sciences, Inc.
Statistics:
# Identified genes	65
# Matched genes	28
# Matched entities	25
Matching score statistics:
# High score matches	3
# Med score matches	22
# Low score matches	0
Results
Score	SuperPath Name	# SuperPath Total Genes	# SuperPath Matched Genes	Matched Genes (Symbols)	Evidence URL
15.2411	ECM Proteoglycans	57	4	TNR, ITGA8, TNN, LRP4	http://pathcards.genecards.org/card/ecm_proteoglycans
13.7225	Glycosphingolipid Biosynthesis - Lacto and Neolacto Series	27	3	B3GALT1, FUT4, FUT9	http://pathcards.genecards.org/card/glycosphingolipid_biosynthesis_-_lacto_and_neolacto_series
13.6113	Cell Adhesion Molecules	149	5	CNTNAP1, CNTNAP2, CDH4, ITGA8, ITGA6	http://pathcards.genecards.org/card/cell_adhesion_molecules
12.7706	Angiogenesis (CST)	89	4	ITGA6, PTGS2, NOTCH2, NOTCH3	http://pathcards.genecards.org/card/angiogenesis_(cst)
12.3488	Focal Adhesion	285	6	TNR, ITGA8, ITGA6, XIAP, PTGS2, TNN	http://pathcards.genecards.org/card/focal_adhesion
12.2746	Wnt / Hedgehog / Notch	182	5	LRP6, SFRP1, NOTCH2, NOTCH3, FUT4	http://pathcards.genecards.org/card/wnt__hedgehog__notch
12.0309	Degradation of The Extracellular Matrix	297	6	TNR, ITGA8, ITGA6, TLL2, TNN, LRP4	http://pathcards.genecards.org/card/degradation_of_the_extracellular_matrix
11.9566	Nucleotide-binding Oligomerization Domain (NOD) Pathway	41	3	RIPK2, CASP1, XIAP	http://pathcards.genecards.org/card/nucleotide-binding_oligomerization_domain_(nod)_pathway
11.7026	MicroRNAs in Cancer	310	6	TNR, PTGS2, TPM1, TNN, NOTCH2, NOTCH3	http://pathcards.genecards.org/card/micrornas_in_cancer
11.2342	ECM-receptor Interaction	118	4	TNR, ITGA8, ITGA6, TNN	http://pathcards.genecards.org/card/ecm-receptor_interaction
10.9412	DREAM Repression and Dynorphin Expression	223	5	ITGA8, RIPK2, CASP1, OAZ1, ITGA6	http://pathcards.genecards.org/card/dream_repression_and_dynorphin_expression
10.2412	Presenilin-Mediated Signaling	142	4	CDH4, CASP1, NOTCH2, NOTCH3	http://pathcards.genecards.org/card/presenilin-mediated_signaling
10.1852	PI3K-Akt Signaling Pathway	525	7	TNR, ITGA8, ITGA6, PTGS2, TNN, NOTCH2, NOTCH3	http://pathcards.genecards.org/card/pi3k-akt_signaling_pathway
10.0847	Etoposide Pathway, Pharmacokinetics/Pharmacodynamics	15	2	PTGS2, MPO	http://pathcards.genecards.org/card/etoposide_pathway_pharmacokineticspharmacodynamics
10.0847	Negative Regulation of TCF-dependent Signaling By WNT Ligand Antagonists	15	2	LRP6, SFRP1	http://pathcards.genecards.org/card/negative_regulation_of_tcf-dependent_signaling_by_wnt_ligand_antagonists
8.88529	Diseases of Glycosylation	86	3	GPC6, NOTCH2, NOTCH3	http://pathcards.genecards.org/card/diseases_of_glycosylation
8.87304	Complement Pathway	23	2	MASP2, MASP1	http://pathcards.genecards.org/card/complement_pathway
8.87304	Mannose Type O-glycan Biosynthesis	23	2	FUT4, FUT9	http://pathcards.genecards.org/card/mannose_type_o-glycan_biosynthesis
8.79177	Complement and Coagulation Cascades	88	3	MASP2, MASP1, F11	http://pathcards.genecards.org/card/complement_and_coagulation_cascades
8.70048	Apoptosis and Survival Caspase Cascade	90	3	RIPK2, CASP1, XIAP	http://pathcards.genecards.org/card/apoptosis_and_survival_caspase_cascade
8.61133	Small Cell Lung Cancer	92	3	ITGA6, XIAP, PTGS2	http://pathcards.genecards.org/card/small_cell_lung_cancer
8.42124	Canonical and Non-canonical Notch Signaling	27	2	NOTCH2, NOTCH3	http://pathcards.genecards.org/card/canonical__and_non-canonical_notch_signaling
8.29464	Development HGF Signaling Pathway	206	4	RIPK2, XIAP, PTGS2, HGFAC	http://pathcards.genecards.org/card/development_hgf_signaling_pathway
8.25672	Neuroscience	341	5	CNTNAP1, CNTNAP2, PTGS2, NOTCH2, NOTCH3	http://pathcards.genecards.org/card/neuroscience
8.23424	Reelin Pathway (Cajal-Retzius Cells)	101	3	ITGA8, ITGA6, LRP6	http://pathcards.genecards.org/card/reelin_pathway_(cajal-retzius_cells)

## Sheet: Late_Enriched gene Set
GeneAnalytics - Analysis Report			Prepared for: Tal Gordon (talgordon@mail.tau.ac.il)
			Date: 7/22/2021
Copyright © LifeMap Sciences, Inc.
Species	Mouse
Identified genes (867)
Symbol	Full Name	Aliases	GeneCards URL
A1cf	APOBEC1 complementation factor	1810073H04Rik, 9130016M20R, 9130016M20Rik, AC, ACF64, ACF65, ASP, Acf, MCM, MerCreMer, Tg(Myh6-cre/Esr1*)1Jmk, alpha-MHC-MerCreMer, alphaMHC-Cre-Mer-Cre, mer	http://www.genecards.org/cgi-bin/carddisp.pl?gene=A1CF
Aass	aminoadipate-semialdehyde synthase	LKR, LKR/SDH, LOR, LOR/SDH, Lo, Lorsdh, SDH	http://www.genecards.org/cgi-bin/carddisp.pl?gene=AASS
Abat	4-aminobutyrate aminotransferase	9630038C02Rik, AI255750, GABA, Gabaat, Gabat, Gm9851, I54, Laibat, X61497	http://www.genecards.org/cgi-bin/carddisp.pl?gene=ABAT
Abcb10	ATP-binding cassette, sub-family B (MDR/TAP), member 10	ABC-m, Abc-me, Abcb12	http://www.genecards.org/cgi-bin/carddisp.pl?gene=ABCB10
Abcb1a	ATP-binding cassette, sub-family B (MDR/TAP), member 1A	Abcb4, Evi, Evi32, Mdr, Mdr1a, Mdr3, P, P-, P-gp, Pgp, Pgy, Pgy-, Pgy-3, Pgy3, mdr-, mdr-3	http://www.genecards.org/cgi-bin/carddisp.pl?gene=ABCB1
Abcb1b	ATP-binding cassette, sub-family B (MDR/TAP), member 1B	Abcb, Abcb1, Mdr1, Mdr1b, Pgy, Pgy-, Pgy-1, Pgy1, md, mdr
Abcc12	ATP-binding cassette, sub-family C (CFTR/MRP), member 12	4930467B22Rik, MR, MRP9	http://www.genecards.org/cgi-bin/carddisp.pl?gene=ABCC12
Abcc3	ATP-binding cassette, sub-family C (CFTR/MRP), member 3	1700019L09Rik, ABC31, MLP2, MOAT-D, MR, MRP3	http://www.genecards.org/cgi-bin/carddisp.pl?gene=ABCC3
Abcc5	ATP-binding cassette, sub-family C (CFTR/MRP), member 5	2900011L11Rik, AI132311, Abcc, Abcc5a, Abcc5b, Mr, Mrp5	http://www.genecards.org/cgi-bin/carddisp.pl?gene=ABCC5
Abcg1	ATP binding cassette subfamily G member 1	AW413978, Abc, Abc8, Whit, White	http://www.genecards.org/cgi-bin/carddisp.pl?gene=ABCG1
Abhd14b	abhydrolase domain containing 14b	1810013B01Rik	http://www.genecards.org/cgi-bin/carddisp.pl?gene=ABHD14B
Abhd4	abhydrolase domain containing 4	1110035H23Rik, AI429574, Abh4	http://www.genecards.org/cgi-bin/carddisp.pl?gene=ABHD4
Acat1	acetyl-Coenzyme A acetyltransferase 1	6330585C21Rik, Ac, Acat	http://www.genecards.org/cgi-bin/carddisp.pl?gene=ACAT1
Ace	angiotensin I converting enzyme (peptidyl-dipeptidase A) 1	AW208573, CD143	http://www.genecards.org/cgi-bin/carddisp.pl?gene=ACE
Ache	acetylcholinesterase		http://www.genecards.org/cgi-bin/carddisp.pl?gene=ACHE
Aco1	aconitase 1	Aco, Aco-1, I, Ir, Irebp, Irp1	http://www.genecards.org/cgi-bin/carddisp.pl?gene=ACO1
Acsf2	acyl-CoA synthetase family member 2		http://www.genecards.org/cgi-bin/carddisp.pl?gene=ACSF2
Acta2	actin, alpha 2, smooth muscle, aorta	0610041G09Rik, Ac, Actvs, SM, SMAalpha, SMalphaA, a-, a-SMA, al, alphaSMA	http://www.genecards.org/cgi-bin/carddisp.pl?gene=ACTA2
Actg1	actin, gamma, cytoplasmic 1	AL023024, Ac, Actg, Actl, E51	http://www.genecards.org/cgi-bin/carddisp.pl?gene=ACTG1
Actr8	ARP8 actin-related protein 8	5730542K05Rik, A, ARP8	http://www.genecards.org/cgi-bin/carddisp.pl?gene=ACTR8
Acy1	aminoacylase 1	1110014J22Rik, Acy-, Acy-1	http://www.genecards.org/cgi-bin/carddisp.pl?gene=ACY1
Ada	adenosine deaminase		http://www.genecards.org/cgi-bin/carddisp.pl?gene=ADA
Adam33	a disintegrin and metallopeptidase domain 33	Adaml	http://www.genecards.org/cgi-bin/carddisp.pl?gene=ADAM33
Adamts18	a disintegrin-like and metallopeptidase (reprolysin type) with thrombospondin type 1 motif, 18	9630038L21, ADAMTS21, E130314N14Rik	http://www.genecards.org/cgi-bin/carddisp.pl?gene=ADAMTS18
Adar	adenosine deaminase, RNA-specific	AD, AV242451, Adar1, Adar1p110, Adar1p150, DRADA, mZa, mZaADAR	http://www.genecards.org/cgi-bin/carddisp.pl?gene=ADAR
Adgrg2	adhesion G protein-coupled receptor G2	AW212196, B830041D06Rik, Gpr, Gpr64, Me6	http://www.genecards.org/cgi-bin/carddisp.pl?gene=ADGRG2
Adgrg7	adhesion G protein-coupled receptor G7	9130020O16Rik, Gpr1, Gpr128	http://www.genecards.org/cgi-bin/carddisp.pl?gene=ADGRG7
Adgrl2	adhesion G protein-coupled receptor L2	AI450192, CIRL-2, Gm619, Lec, Lec1, Lp, Lph, Lphh1, Lphn2, mKIAA0786	http://www.genecards.org/cgi-bin/carddisp.pl?gene=ADGRL2
Adgrl3	adhesion G protein-coupled receptor L3	5430402I23Rik, CIRL-3, D130075K09Rik, Gm1379, LEC, LEC3, Lp, Lphn3, mKIAA0768	http://www.genecards.org/cgi-bin/carddisp.pl?gene=ADGRL3
Adora2b	adenosine A2b receptor	A2, A2BAR, A2BR, A2b, AA, AA2BR, AI480866, AI605384, AR, ARA2B	http://www.genecards.org/cgi-bin/carddisp.pl?gene=ADORA2B
Adsl	adenylosuccinate lyase	Adl, Asl	http://www.genecards.org/cgi-bin/carddisp.pl?gene=ADSL
Aebp1	AE binding protein 1	A, ACLP	http://www.genecards.org/cgi-bin/carddisp.pl?gene=AEBP1
Aen	apoptosis enhancing nuclease	2700083B06Rik, Isg2, Isg20l1	http://www.genecards.org/cgi-bin/carddisp.pl?gene=AEN
Afmid	arylformamidase	9030621K19Rik, Ammd, FKF, KFA, Kf, form, formylase	http://www.genecards.org/cgi-bin/carddisp.pl?gene=AFMID
Agbl5	ATP/GTP binding protein-like 5	9430057O19Rik, CCP5, Ccp	http://www.genecards.org/cgi-bin/carddisp.pl?gene=AGBL5
Agmat	agmatine ureohydrolase (agmatinase)	5033405N08Rik	http://www.genecards.org/cgi-bin/carddisp.pl?gene=AGMAT
Agrn	agrin	A, Agrin, NMF38, nmf380	http://www.genecards.org/cgi-bin/carddisp.pl?gene=AGRN
Agtpbp1	ATP/GTP binding protein 1	1700020N17Rik, 2310001G17Rik, 2900054O13Rik, 4930445M19Rik, 5730402G09Rik, CCP1, Ccp, N, Nna1, at, atms, nmf243, pcd	http://www.genecards.org/cgi-bin/carddisp.pl?gene=AGTPBP1
Agtrap	angiotensin II, type I receptor-associated protein	3300002E14Rik, A, AT1R, Atrap, D4Wsu124, D4Wsu124e	http://www.genecards.org/cgi-bin/carddisp.pl?gene=AGTRAP
Aifm2	apoptosis-inducing factor, mitochondrion-associated 2	5430437E11Rik, Am, Amid, D730001I10Rik, FSP1, PR, PRG3	http://www.genecards.org/cgi-bin/carddisp.pl?gene=AIFM2
Ak1	adenylate kinase 1	Ak-, Ak-1, B430205N08Rik	http://www.genecards.org/cgi-bin/carddisp.pl?gene=AK1
Ak2	adenylate kinase 2	Ak-, Ak-2, D4Ertd220, D4Ertd220e	http://www.genecards.org/cgi-bin/carddisp.pl?gene=AK2
Ak7	adenylate kinase 7	4930502N02Rik, AK 7	http://www.genecards.org/cgi-bin/carddisp.pl?gene=AK7
Ak8	adenylate kinase 8	1190002A17Rik, AK 8	http://www.genecards.org/cgi-bin/carddisp.pl?gene=AK8
Akap9	A kinase (PRKA) anchor protein (yotiao) 9	5730481H23Rik, AKAP, AKAP-9, AKAP450, AW545847, C79026, G1-448-15, PRKA9, mKIAA0803, mei2-, mei2-5, rep, repro12	http://www.genecards.org/cgi-bin/carddisp.pl?gene=AKAP9
Akr1a1	aldo-keto reductase family 1, member A1 (aldehyde reductase)	2610201A18Rik, Akr, Akr1a4	http://www.genecards.org/cgi-bin/carddisp.pl?gene=AKR1A1
Akr1b7	aldo-keto reductase family 1, member B7	A, AR, Avdp, MV, MVDP
Aldh1a2	aldehyde dehydrogenase family 1, subfamily A2	AV116159, Aldh, Aldh1a7, Ral, Raldh1, Raldh2	http://www.genecards.org/cgi-bin/carddisp.pl?gene=ALDH1A2
Aldh1l2	aldehyde dehydrogenase 1 family, member L2	D330038I09Rik, mtFDH	http://www.genecards.org/cgi-bin/carddisp.pl?gene=ALDH1L2
Aldh2	aldehyde dehydrogenase 2, mitochondrial	AHD-M1, ALDH-E2, ALDHI, Ahd, Ahd-, Ahd-5, Ahd5	http://www.genecards.org/cgi-bin/carddisp.pl?gene=ALDH2
Aldh3b2	aldehyde dehydrogenase 3 family, member B2	AI848594, C130048D07Rik	http://www.genecards.org/cgi-bin/carddisp.pl?gene=ALDH3B2
Aldh5a1	aldhehyde dehydrogenase family 5, subfamily A1	6330403E24Rik, Ahd-1, Ahd1, D630032B01Rik, SS, SSADH, Ssdh1	http://www.genecards.org/cgi-bin/carddisp.pl?gene=ALDH5A1
Alg6	asparagine-linked glycosylation 6 (alpha-1,3,-glucosyltransferase)	E230028F23Rik	http://www.genecards.org/cgi-bin/carddisp.pl?gene=ALG6
Alkbh5	alkB homolog 5, RNA demethylase	AW050020, AW215868, Abh, Abh5, E130207K11, Ofo, Ofoxd	http://www.genecards.org/cgi-bin/carddisp.pl?gene=ALKBH5
Alox5	arachidonate 5-lipoxygenase	5-L, 5-LO, 5-LOX, 5L, 5LO, 5LX, AI850497, F730011J02	http://www.genecards.org/cgi-bin/carddisp.pl?gene=ALOX5
Alpl	alkaline phosphatase, liver/bone/kidney	ALP, APTNAP, Ak, Akp, Akp-2, Akp2, T, TNAP, TNSALP	http://www.genecards.org/cgi-bin/carddisp.pl?gene=ALPL
Amy1	amylase 1, salivary	Amy-, Amy-1, Amy1a, C030014B17Rik	http://www.genecards.org/cgi-bin/carddisp.pl?gene=AMY2A
Ank1	ankyrin 1, erythroid	Ank, Ank-1, nb, p, pale	http://www.genecards.org/cgi-bin/carddisp.pl?gene=ANK1
Ank2	ankyrin 2, brain	100043364, AI835472, AW491075, Ank, Ank-2, Anky, Gm4392	http://www.genecards.org/cgi-bin/carddisp.pl?gene=ANK2
Ankar	ankyrin and armadillo repeat containing	4932422E22Rik	http://www.genecards.org/cgi-bin/carddisp.pl?gene=ANKAR
Ankef1	ankyrin repeat and EF-hand domain containing 1	AV276460, Ank, Ankrd5	http://www.genecards.org/cgi-bin/carddisp.pl?gene=ANKEF1
Ankrd17	ankyrin repeat domain 17	4933425K22Rik, A130069E23Rik, A930008M01, AA407558, AA516750, AU040470, Foe, Gt, Gtar, Mask, mKIAA0697	http://www.genecards.org/cgi-bin/carddisp.pl?gene=ANKRD17
Ankub1	ankrin repeat and ubiquitin domain containing 1	Gm410	http://www.genecards.org/cgi-bin/carddisp.pl?gene=ANKUB1
Ankzf1	ankyrin repeat and zinc finger domain containing 1	1300008P06Rik, 2810025E10Rik, D1Ertd161, D1Ertd161e	http://www.genecards.org/cgi-bin/carddisp.pl?gene=ANKZF1
Ano4	anoctamin 4	A330096O15Rik, Gm65, Tmem16d	http://www.genecards.org/cgi-bin/carddisp.pl?gene=ANO4
Anxa13	annexin A13	1810034H17Rik, AV055219	http://www.genecards.org/cgi-bin/carddisp.pl?gene=ANXA13
Anxa7	annexin A7	AI265384, AI316497, An, Anx7, syn, synexin	http://www.genecards.org/cgi-bin/carddisp.pl?gene=ANXA7
Aox4	aldehyde oxidase 4	2310003G12Rik, AO, Aoh2
Aplnr	apelin receptor	A, APJ, Agt, Agtrl1, msr/apj	http://www.genecards.org/cgi-bin/carddisp.pl?gene=APLNR
Apmap	adipocyte plasma membrane associated protein	2310001A20Rik, AI314817	http://www.genecards.org/cgi-bin/carddisp.pl?gene=APMAP
Appbp2	amyloid beta precursor protein (cytoplasmic tail) binding protein 2	1300003O07Rik, AI465480, PA, PAT1	http://www.genecards.org/cgi-bin/carddisp.pl?gene=APPBP2
Aqp8	aquaporin 8	AI255744, AQP-8	http://www.genecards.org/cgi-bin/carddisp.pl?gene=AQP8
Arf1	ADP-ribosylation factor 1		http://www.genecards.org/cgi-bin/carddisp.pl?gene=ARF1
Arhgef17	Rho guanine nucleotide exchange factor (GEF) 17	8030463K16, AI428794, AW558066, BC035332, mKIAA0337	http://www.genecards.org/cgi-bin/carddisp.pl?gene=ARHGEF17
Arl6ip4	ADP-ribosylation factor-like 6 interacting protein 4	AA408210, AA408365, Ai, Aip-4, Sr, Srp25	http://www.genecards.org/cgi-bin/carddisp.pl?gene=ARL6IP4
Arsa	arylsulfatase A	A, AS-A, ASA, AW212749, As, As-2, As2, TISP73	http://www.genecards.org/cgi-bin/carddisp.pl?gene=ARSA
Asic1	acid-sensing (proton-gated) ion channel 1	A, AI843610, AS, ASIC, ASIC1a, Acc, Accn2, B530003N02Rik, BNa, BNaC2	http://www.genecards.org/cgi-bin/carddisp.pl?gene=ASIC1
Aspg	asparaginase	A530050D06Rik, AI429460, Gm690	http://www.genecards.org/cgi-bin/carddisp.pl?gene=ASPG
Asrgl1	asparaginase like 1	2410004D18Rik, A, ALP, ALP1, AU040643, AW060375	http://www.genecards.org/cgi-bin/carddisp.pl?gene=ASRGL1
Atl1	atlastin GTPase 1	4930435M24Rik, AD-, Adfsp, FS, Fsp1, SP, Spg3, Spg3a	http://www.genecards.org/cgi-bin/carddisp.pl?gene=ATL1
Atl2	atlastin GTPase 2	2010110I21Rik, AA407293, AV334690, Ai, Aip-2, Ar, Arl6ip2	http://www.genecards.org/cgi-bin/carddisp.pl?gene=ATL2
Atl3	atlastin GTPase 3	4633402C03Rik, 5730596K20Rik, AI465397, AW228836	http://www.genecards.org/cgi-bin/carddisp.pl?gene=ATL3
Atp13a3	ATPase type 13A3	AU022875, Gm1745, Gm541, Gm542	http://www.genecards.org/cgi-bin/carddisp.pl?gene=ATP13A3
Axdnd1	axonemal dynein light chain domain containing 1	9430070O13Rik, Gm979	http://www.genecards.org/cgi-bin/carddisp.pl?gene=AXDND1
B3galt5	UDP-Gal:betaGlcNAc beta 1,3-galactosyltransferase, polypeptide 5	1190002B21Rik, AU045265, b3Gal, b3Galt-V	http://www.genecards.org/cgi-bin/carddisp.pl?gene=B3GALT5
B4galt1	UDP-Gal:betaGlcNAc beta 1,4- galactosyltransferase, polypeptide 1	B-1,4-GalT, B-1,4-GalT1, Ga, GalT, Ggtb, Ggtb2, b4Gal-T1, beta-1,4-GalT, beta-1,4-GalT1, beta4Gal-T1	http://www.genecards.org/cgi-bin/carddisp.pl?gene=B4GALT1
B4galt2	UDP-Gal:betaGlcNAc beta 1,4- galactosyltransferase, polypeptide 2	Ggtb2	http://www.genecards.org/cgi-bin/carddisp.pl?gene=B4GALT2
B4gat1	beta-1,4-glucuronyltransferase 1	1500032M01Rik, B3gnt1, B3gnt6, BETA3GNT1, iGAT, iGNT	http://www.genecards.org/cgi-bin/carddisp.pl?gene=B4GAT1
Baat	bile acid-Coenzyme A: amino acid N-acyltransferase	AI118337, AI158864, BA, BAT	http://www.genecards.org/cgi-bin/carddisp.pl?gene=BAAT
Bche	butyrylcholinesterase	C730038G20Rik	http://www.genecards.org/cgi-bin/carddisp.pl?gene=BCHE
Bcl11b	B cell leukemia/lymphoma 11B	9130430L19Rik, AI604821, B630002E05Rik, BCL-11B, CTI, Ctip2, Ri, Rit1	http://www.genecards.org/cgi-bin/carddisp.pl?gene=BCL11B
Bcl6	B cell leukemia/lymphoma 6	Bcl, Bcl5	http://www.genecards.org/cgi-bin/carddisp.pl?gene=BCL6
Bhlha15	basic helix-loop-helix family, member a15	1810009C13Rik, Bhlhb, Bhlhb8, MIST-1, Mis, Mist1	http://www.genecards.org/cgi-bin/carddisp.pl?gene=BHLHA15
Bhmt	betaine-homocysteine methyltransferase		http://www.genecards.org/cgi-bin/carddisp.pl?gene=BHMT
Birc2	baculoviral IAP repeat-containing 2	A, AW146227, Api1, Api2, Birc3, C-IAP1, C330006D17Rik, HI, HIAP1, HIAP2, I, IAP1, IAP2, MI, MIAP1, MIAP2, MIH, MIHB, MIHC, RNF48, cI, cIA, cIAP1, cIAP2, mcI, mcIAP1	http://www.genecards.org/cgi-bin/carddisp.pl?gene=BIRC2
Birc3	baculoviral IAP repeat-containing 3	A, AW107670, Api1, Api2, Birc2, C-IAP2, HI, HIAP2, I, IAP1, IAP2, MI, MIAP1, MIAP2, MIH, MIHB, MIHC, RNF, RNF49, cI, cIA, cIAP-1, cIAP-2, cIAP1, cIAP2	http://www.genecards.org/cgi-bin/carddisp.pl?gene=BIRC3
Blvrb	biliverdin reductase B (flavin reductase (NADPH))		http://www.genecards.org/cgi-bin/carddisp.pl?gene=BLVRB
Bves	blood vessel epicardial substance	Pop, Pop1, Popdc1, mBVES	http://www.genecards.org/cgi-bin/carddisp.pl?gene=BVES
C1galt1	core 1 synthase, glycoprotein-N-acetylgalactosamine 3-beta-galactosyltransferase, 1	2210410E06Rik, AV284120, T-synt, T-synthase	http://www.genecards.org/cgi-bin/carddisp.pl?gene=C1GALT1
C1qbp	complement component 1, q subcomponent binding protein	AA407365, AA986492, D11Wsu182, D11Wsu182e, HAB, HABP1, P3, P32, gC1qBP	http://www.genecards.org/cgi-bin/carddisp.pl?gene=C1QBP
C3	complement component 3	AI255234, ASP, HSE-MSF, Plp	http://www.genecards.org/cgi-bin/carddisp.pl?gene=C3
Calhm6	calcium homeostasis modulator family member 6	A630077B13Rik, Fam26, Fam26f	http://www.genecards.org/cgi-bin/carddisp.pl?gene=CALHM6
Camkmt	calmodulin-lysine N-methyltransferase	1700106N22Rik, AI480743, AV099781, CLNMT, CaM KMT	http://www.genecards.org/cgi-bin/carddisp.pl?gene=CAMKMT
Cant1	calcium activated nucleotidase 1	5830420C20Rik, Apy, Apy1h, D11Bwg0554e, Entpd8, SCA, SCAN-1, Sh, Shapy	http://www.genecards.org/cgi-bin/carddisp.pl?gene=CANT1
Capn1	calpain 1	Ca, Cap, Capa-1, Capa1, mu-c, mu-calpin	http://www.genecards.org/cgi-bin/carddisp.pl?gene=CAPN1
Capn15	calpain 15	S, Solh	http://www.genecards.org/cgi-bin/carddisp.pl?gene=CAPN15
Capn9	calpain 9	2200003B16Rik, GC36, nCL, nCL-4, nCL4	http://www.genecards.org/cgi-bin/carddisp.pl?gene=CAPN9
Capsl	calcyphosine-like	1700028N11Rik, AW125205	http://www.genecards.org/cgi-bin/carddisp.pl?gene=CAPSL
Card11	caspase recruitment domain family, member 11	0610008L17Rik, 2410011D02Rik, BIM, BIMP3, CAR, CARMA1	http://www.genecards.org/cgi-bin/carddisp.pl?gene=CARD11
Casp14	caspase 14	MIC, MICE, mini, mini-ICE	http://www.genecards.org/cgi-bin/carddisp.pl?gene=CASP14
Casp2	caspase 2	CASP-2, Casp, ICH-1, Ich-, NEDD-2, Nedd, Nedd2	http://www.genecards.org/cgi-bin/carddisp.pl?gene=CASP2
Casp7	caspase 7	AI314680, CMH-1, ICE-, ICE-IAP3, Mch3, casp, caspase-7, mCASP-7	http://www.genecards.org/cgi-bin/carddisp.pl?gene=CASP7
Casp8	caspase 8	CASP-8, Casp, FLI, FLICE, MAC, MACH, Mch5	http://www.genecards.org/cgi-bin/carddisp.pl?gene=CASP8
Casp9	caspase 9	AI115399, APAF-3, AW493809, CASP-9, Casp, Caspase-9, ICE-, ICE-LAP6, Mch6	http://www.genecards.org/cgi-bin/carddisp.pl?gene=CASP9
Casr	calcium-sensing receptor	C, CaR, Gpr, Gprc2a	http://www.genecards.org/cgi-bin/carddisp.pl?gene=CASR
Cc2d2a	coiled-coil and C2 domain containing 2A	5730509K17Rik, b2b1035C, b2b1035Clo	http://www.genecards.org/cgi-bin/carddisp.pl?gene=CC2D2A
Ccdc130	coiled-coil domain containing 130	4930527D15Rik, C77430	http://www.genecards.org/cgi-bin/carddisp.pl?gene=YJU2B
Ccdc162	coiled-coil domain containing 162	5033413D22Rik, Ccdc162p, Gm29096, Gm61, Gm6976
Ccdc18	coiled-coil domain containing 18	1700021E15Rik, 4932411G06Rik, NY-SAR-41	http://www.genecards.org/cgi-bin/carddisp.pl?gene=CCDC18
Ccdc39	coiled-coil domain containing 39	4921507O14Rik, AI447426, AI844750, D3Ertd789, D3Ertd789e, b2b1304C, b2b1304Clo, b2b1735C, b2b1735Clo, b2b2025.1Clo, p, prh	http://www.genecards.org/cgi-bin/carddisp.pl?gene=CCDC39
Ccdc63	coiled-coil domain containing 63	4921511C16Rik	http://www.genecards.org/cgi-bin/carddisp.pl?gene=CCDC63
Ccdc88a	coiled coil domain containing 88A	A430106J12Rik, AI848406, Ape, C130096N06Rik, C330012F17Rik, D130005J21Rik, G, Gi, Girdin, Giv, Grdn, HkR, Hkrp1	http://www.genecards.org/cgi-bin/carddisp.pl?gene=CCDC88A
Ccdc96	coiled-coil domain containing 96	4921513E08Rik	http://www.genecards.org/cgi-bin/carddisp.pl?gene=CCDC96
Ccnj	cyclin J	D430039C20Rik	http://www.genecards.org/cgi-bin/carddisp.pl?gene=CCNJ
Ccnt2	cyclin T2	2900041I18Rik, C81304, CycT2, CycT2a, CycT2b	http://www.genecards.org/cgi-bin/carddisp.pl?gene=CCNT2
Cct2	chaperonin containing Tcp1, subunit 2 (beta)	Cctb	http://www.genecards.org/cgi-bin/carddisp.pl?gene=CCT2
Cd109	CD109 antigen	9930012E15Rik, AI480638, GARP	http://www.genecards.org/cgi-bin/carddisp.pl?gene=CD109
Cd207	CD207 antigen	La	http://www.genecards.org/cgi-bin/carddisp.pl?gene=CD207
Cd209b	CD209b antigen	1810030I22Rik, DC-SIGNR1, OtB7, SI, SIGNR1, mSI, mSIGNR1
Cd82	CD82 antigen	AA682076, AL023070, C33, IA4, Ka, Kai1, Tsp, Tspan27	http://www.genecards.org/cgi-bin/carddisp.pl?gene=CD82
Cdc5l	cell division cycle 5-like (S. pombe)	1200002I02Rik, AA408004, PCDC, PCDC5RP	http://www.genecards.org/cgi-bin/carddisp.pl?gene=CDC5L
Cdc6	cell division cycle 6	CDC18, CDC18L, p62(cdc6)	http://www.genecards.org/cgi-bin/carddisp.pl?gene=CDC6
Cdk14	cyclin-dependent kinase 14	Pftk, Pftk1, mKIAA0834	http://www.genecards.org/cgi-bin/carddisp.pl?gene=CDK14
Cdk17	cyclin-dependent kinase 17	6430598J10Rik, Pctk, Pctk2	http://www.genecards.org/cgi-bin/carddisp.pl?gene=CDK17
Cdk2	cyclin-dependent kinase 2	A630093N05Rik	http://www.genecards.org/cgi-bin/carddisp.pl?gene=CDK2
Cdkl2	cyclin-dependent kinase-like 2 (CDC2-related kinase)	5330436L21Rik, AI505225, KKIA, KKIAMRE, Kkm	http://www.genecards.org/cgi-bin/carddisp.pl?gene=CDKL2
Cdkl5	cyclin-dependent kinase-like 5	BC038161, Stk, Stk9	http://www.genecards.org/cgi-bin/carddisp.pl?gene=CDKL5
Cdo1	cysteine dioxygenase 1, cytosolic	1300002L19Rik, Cd, Cdo, D18Ucl, D18Ucla3	http://www.genecards.org/cgi-bin/carddisp.pl?gene=CDO1
Celf2	CUGBP, Elav-like family member 2	B230218O03, B230345P09Rik, C88023, CELF-2, CUG-BP2, Cugbp, Cugbp2, D230046B21Rik, ETR-, Etr-3, Na, Napor, Napor-2, mETR-3	http://www.genecards.org/cgi-bin/carddisp.pl?gene=CELF2
Celf3	CUGBP, Elav-like family member 3	4930415M08Rik, BRU, BRUNOL1, CAGH, CAGH4, ERD, ERDA4, ETR-1, Tnr, Tnrc4	http://www.genecards.org/cgi-bin/carddisp.pl?gene=CELF3
Cep44	centrosomal protein 44	4933440G23Rik, mKIAA1712	http://www.genecards.org/cgi-bin/carddisp.pl?gene=CEP44
Cers2	ceramide synthase 2	0610013I17Rik, AI225939, Cer, L, Lass2, TRH3, Trh	http://www.genecards.org/cgi-bin/carddisp.pl?gene=CERS2
Ces2e	carboxylesterase 2E	9030624L02Rik, Ces, Ces5
Cfap206	cilia and flagella associated protein 206	1700003M02Rik, AU024269	http://www.genecards.org/cgi-bin/carddisp.pl?gene=CFAP206
Cfap221	cilia and flagella associated protein 221	Gm101, Pcd, Pcdp1	http://www.genecards.org/cgi-bin/carddisp.pl?gene=CFAP221
Cfap300	cilia and flagella associated protein 300	9230110C19Rik	http://www.genecards.org/cgi-bin/carddisp.pl?gene=CFAP300
Cfap44	cilia and flagella associated protein 44	6330444M21Rik, D16Ertd642, D16Ertd642e, Gm1750, Wdr5, Wdr52	http://www.genecards.org/cgi-bin/carddisp.pl?gene=CFAP44
Cfap54	cilia and flagella associated protein 54	4930485B16Rik, Gm872	http://www.genecards.org/cgi-bin/carddisp.pl?gene=CFAP54
Cfap74	cilia and flagella associated protein 74	2010015L04Rik, A530045M11	http://www.genecards.org/cgi-bin/carddisp.pl?gene=CFAP74
Cfap91	cilia and flagella associated protein 91	4932425I24Rik, Aat1, Maats1, Spa, Spata26	http://www.genecards.org/cgi-bin/carddisp.pl?gene=CFAP91
Cfb	complement factor B	AI195813, AI255840, B, Bf, C2, Fb, H2-Bf	http://www.genecards.org/cgi-bin/carddisp.pl?gene=CFB
Ch25h	cholesterol 25-hydroxylase	AI462618, m25O, m25OH	http://www.genecards.org/cgi-bin/carddisp.pl?gene=CH25H
Chchd2	coiled-coil-helix-coiled-coil-helix domain containing 2	AL033347, Etoh, Etohi6	http://www.genecards.org/cgi-bin/carddisp.pl?gene=CHCHD2
Chl1	cell adhesion molecule L1-like	A530023M13Rik, AI465420, C, CALL, LIC, LICAM2	http://www.genecards.org/cgi-bin/carddisp.pl?gene=CHL1
Chrna1	cholinergic receptor, nicotinic, alpha polypeptide 1 (muscle)	A, AI385656, AI608266, Achr, Achr-1, Acra	http://www.genecards.org/cgi-bin/carddisp.pl?gene=CHRNA1
Chrnb1	cholinergic receptor, nicotinic, beta polypeptide 1 (muscle)	Ac, Achr, Achr-2, Acrb	http://www.genecards.org/cgi-bin/carddisp.pl?gene=CHRNB1
Chst1	carbohydrate sulfotransferase 1	2610008E20Rik, AW125896, C6S, C6ST, GST-, GST-1, Gst1, KS6ST, KSGA, KSGAL6ST, KSST	http://www.genecards.org/cgi-bin/carddisp.pl?gene=CHST1
Chst14	carbohydrate sulfotransferase 14	2600016L03Rik, D4ST-, D4ST-1, D4st, D4st1	http://www.genecards.org/cgi-bin/carddisp.pl?gene=CHST14
Chst9	carbohydrate (N-acetylgalactosamine 4-0) sulfotransferase 9	5430438D01Rik, GalNAc, GalNAc4ST-2, galNAc-4-ST2	http://www.genecards.org/cgi-bin/carddisp.pl?gene=CHST9
Cilp	cartilage intermediate layer protein, nucleotide pyrophosphohydrolase	9830114D16, C130036G17Rik, CILP-1	http://www.genecards.org/cgi-bin/carddisp.pl?gene=CILP
Clca3a1	chloride channel accessory 3A1	Cacc, Clc, Clca1
Clca4a	chloride channel accessory 4A	9130020L07Rik, AI504701, Clc, Clca4, Clca6	http://www.genecards.org/cgi-bin/carddisp.pl?gene=CLCA4
Cldn19	claudin 19		http://www.genecards.org/cgi-bin/carddisp.pl?gene=CLDN19
Clec4e	C-type lectin domain family 4, member e	C86253, Clecs, Clecsf9, Min, Mincle	http://www.genecards.org/cgi-bin/carddisp.pl?gene=CLEC4E
Clec4f	C-type lectin domain family 4, member f	Clecsf, Clecsf13, D18063, KUCR_MOUSE, Kclr	http://www.genecards.org/cgi-bin/carddisp.pl?gene=CLEC4F
Clec4g	C-type lectin domain family 4, member g	4930572L20Rik	http://www.genecards.org/cgi-bin/carddisp.pl?gene=CLEC4G
Clps	colipase, pancreatic	2200003J09Rik	http://www.genecards.org/cgi-bin/carddisp.pl?gene=CLPS
Cltb	clathrin, light polypeptide (Lcb)	2310046E19Rik, lcb	http://www.genecards.org/cgi-bin/carddisp.pl?gene=CLTB
Clybl	citrate lyase beta like	0610033J05Rik, 2310014M14Rik, AI256068, Cl, Clb	http://www.genecards.org/cgi-bin/carddisp.pl?gene=CLYBL
Cmip	c-Maf inducing protein	4933407C03Rik, 5830471E12Rik, AI314065, AI464126	http://www.genecards.org/cgi-bin/carddisp.pl?gene=CMIP
Cntn5	contactin 5	6720426O10Rik, A830025P08Rik, Gm507, NB-, NB-2	http://www.genecards.org/cgi-bin/carddisp.pl?gene=CNTN5
Cntnap1	contactin associated protein-like 1	AI841080, C, Caspr, NC, NCP1, Nr, Nrxn4, p, p19, p190, sh, shm	http://www.genecards.org/cgi-bin/carddisp.pl?gene=CNTNAP1
Cntnap2	contactin associated protein-like 2	5430425M22Rik, Ca, Caspr2, mKIAA0868	http://www.genecards.org/cgi-bin/carddisp.pl?gene=CNTNAP2
Cntnap4	contactin associated protein-like 4	Ca, Caspr4, E130114F09Rik	http://www.genecards.org/cgi-bin/carddisp.pl?gene=CNTNAP4
Cntnap5c	contactin associated protein-like 5C	Caspr5-3, EG620292, Gm325
Cntrl	centriolin	6720467O09Rik, AA968343, Cep, Cep1, Cep11, Cep110, IB3/, IB3/5, Ma2, Ma2a8, b2b1468.1Clo, b2b1468C, b2b1468Clo	http://www.genecards.org/cgi-bin/carddisp.pl?gene=CNTRL
Coasy	Coenzyme A synthase	1300003G02Rik, Dpc, Dpck, P, Ppat, Ukr, Ukr1	http://www.genecards.org/cgi-bin/carddisp.pl?gene=COASY
Col12a1	collagen, type XII, alpha 1		http://www.genecards.org/cgi-bin/carddisp.pl?gene=COL12A1
Col6a6	collagen, type VI, alpha 6	E330019B14, E330026B02Rik	http://www.genecards.org/cgi-bin/carddisp.pl?gene=COL6A6
Colec10	collectin sub-family member 10	CL-, CL-L1	http://www.genecards.org/cgi-bin/carddisp.pl?gene=COLEC10
Colec11	collectin sub-family member 11	CL-K1	http://www.genecards.org/cgi-bin/carddisp.pl?gene=COLEC11
Colec12	collectin sub-family member 12	CL-, CL-P1, S, SRCL, Sc, Scara4	http://www.genecards.org/cgi-bin/carddisp.pl?gene=COLEC12
Cotl1	coactosin-like 1 (Dictyostelium)	1810074P22Rik, 2010004C08Rik, Clp	http://www.genecards.org/cgi-bin/carddisp.pl?gene=COTL1
Cpn1	carboxypeptidase N, polypeptide 1	0610011F20Rik, C, CPN	http://www.genecards.org/cgi-bin/carddisp.pl?gene=CPN1
Cpne3	copine III	5430428M23Rik, 5730450C07Rik, C85108, CP, CPN3, PRO1	http://www.genecards.org/cgi-bin/carddisp.pl?gene=CPNE3
Cpt1a	carnitine palmitoyltransferase 1a, liver	C730027G07, CP, CPTI, Cpt, Cpt1	http://www.genecards.org/cgi-bin/carddisp.pl?gene=CPT1A
Cptp	ceramide-1-phosphate transfer protein	Gltp, Gltpd1	http://www.genecards.org/cgi-bin/carddisp.pl?gene=CPTP
Cpxm2	carboxypeptidase X 2 (M14 family)	4632435C11Rik, CPX-2, Cpx2	http://www.genecards.org/cgi-bin/carddisp.pl?gene=CPXM2
Cramp1	cramped chromatin regulator 1	5830477H08Rik, AI256853, AI790734, Cramp1l, Tce4, mKIAA1426	http://www.genecards.org/cgi-bin/carddisp.pl?gene=CRAMP1
Crebbp	CREB binding protein	AW558298, CB, CBP, CBP/p300, KAT, KAT3A, p300/CBP	http://www.genecards.org/cgi-bin/carddisp.pl?gene=CREBBP
Creg2	cellular repressor of E1A-stimulated genes 2	A830098L22Rik	http://www.genecards.org/cgi-bin/carddisp.pl?gene=CREG2
Crispld2	cysteine-rich secretory protein LCCL domain containing 2	1810049K24Rik, Lcrisp2, Lg, Lgl1, coffee, coffeecrisp	http://www.genecards.org/cgi-bin/carddisp.pl?gene=CRISPLD2
Cryab	crystallin, alpha B	Cry, Crya, Crya-2, Crya2, Hsp, HspB5, P23	http://www.genecards.org/cgi-bin/carddisp.pl?gene=CRYAB
Csmd1	CUB and Sushi multiple domains 1	B930082H09, mKIAA1890	http://www.genecards.org/cgi-bin/carddisp.pl?gene=CSMD1
Csmd3	CUB and Sushi multiple domains 3	4930500N14Rik, mKIAA1894	http://www.genecards.org/cgi-bin/carddisp.pl?gene=CSMD3
Ctss	cathepsin S	Cats	http://www.genecards.org/cgi-bin/carddisp.pl?gene=CTSS
Ctu2	cytosolic thiouridylase subunit 2	2310061F22Rik, C16orf84, Ncs2	http://www.genecards.org/cgi-bin/carddisp.pl?gene=CTU2
Cxxc1	CXXC finger 1 (PHD domain)	2410002I16Rik, 5830420C16Rik, AI426635, Cfp, Cfp1, Cgb, Cgbp, PHF1, PHF18	http://www.genecards.org/cgi-bin/carddisp.pl?gene=CXXC1
Cybb	cytochrome b-245, beta polypeptide	C88302, CGD91-phox, Cgd, Cyd, No, Nox2, gp91-1, gp91<ph, gp91p, gp91phox	http://www.genecards.org/cgi-bin/carddisp.pl?gene=CYBB
Cyp1a1	cytochrome P450, family 1, subfamily a, polypeptide 1	AHH, AHRR, CP11, CYPIA1, P450-, P450-1	http://www.genecards.org/cgi-bin/carddisp.pl?gene=CYP1A1
Cyp1b1	cytochrome P450, family 1, subfamily b, polypeptide 1	CP1B, CYPIB1, P4501b1	http://www.genecards.org/cgi-bin/carddisp.pl?gene=CYP1B1
Cyp26b1	cytochrome P450, family 26, subfamily b, polypeptide 1	CP2, CP26, P450R, P450RAI-2	http://www.genecards.org/cgi-bin/carddisp.pl?gene=CYP26B1
Cyp2c23	cytochrome P450, family 2, subfamily c, polypeptide 23	AW107714, BC034834, Cyp2c4, Cyp2c44, b2b386Clo
Cyp2j6	cytochrome P450, family 2, subfamily j, polypeptide 6		http://www.genecards.org/cgi-bin/carddisp.pl?gene=CYP2J2
Cyp2r1	cytochrome P450, family 2, subfamily r, polypeptide 1		http://www.genecards.org/cgi-bin/carddisp.pl?gene=CYP2R1
Cyp2u1	cytochrome P450, family 2, subfamily u, polypeptide 1	8430436A10Rik	http://www.genecards.org/cgi-bin/carddisp.pl?gene=CYP2U1
Cyp3a13	cytochrome P450, family 3, subfamily a, polypeptide 13	II, IIIAm2	http://www.genecards.org/cgi-bin/carddisp.pl?gene=CYP3A7
D6Wsu163e	DNA segment, Chr 6, Wayne State University 163, expressed	C12orf4	http://www.genecards.org/cgi-bin/carddisp.pl?gene=C12orf4
Dapk1	death associated protein kinase 1	D13Ucl, D13Ucla1, DAP-, DAP-Kinase	http://www.genecards.org/cgi-bin/carddisp.pl?gene=DAPK1
Dapk3	death-associated protein kinase 3	ZIPK, dlk	http://www.genecards.org/cgi-bin/carddisp.pl?gene=DAPK3
Dclre1a	DNA cross-link repair 1A	2810043H12Rik, AU022226, Pso2, SM, SN, Smn1a, Snm1, mKIAA0086, mSN	http://www.genecards.org/cgi-bin/carddisp.pl?gene=DCLRE1A
Dctd	dCMP deaminase	6030466N05Rik	http://www.genecards.org/cgi-bin/carddisp.pl?gene=DCTD
Dcxr	dicarbonyl L-xylulose reductase	0610038K04Rik, 1810027P18Rik, XR	http://www.genecards.org/cgi-bin/carddisp.pl?gene=DCXR
Ddrgk1	DDRGK domain containing 1	1110001I20Rik, 2600009E05Rik, AI326138, Ufbp1	http://www.genecards.org/cgi-bin/carddisp.pl?gene=DDRGK1
Ddx17	DEAD box helicase 17	2610007K22Rik, A430025E01Rik, AI047725, C80929, Gm926, p7, p72	http://www.genecards.org/cgi-bin/carddisp.pl?gene=DDX17
Ddx52	DExD box helicase 52	2700029C06Rik, RO, ROK1	http://www.genecards.org/cgi-bin/carddisp.pl?gene=DDX52
Dglucy	D-glutamate cyclase	9030617O03Rik	http://www.genecards.org/cgi-bin/carddisp.pl?gene=DGLUCY
Dhrs1	dehydrogenase/reductase (SDR family) member 1	1110029G07Rik, AW112170, D14Ertd484e	http://www.genecards.org/cgi-bin/carddisp.pl?gene=DHRS1
Dhrs11	dehydrogenase/reductase (SDR family) member 11		http://www.genecards.org/cgi-bin/carddisp.pl?gene=DHRS11
Dhrs4	dehydrogenase/reductase (SDR family) member 4	AI043103, AI790593, CR, D14Ucl, D14Ucla2, NDRD, PHCR, PSCD, R, RRD, mouNRDR	http://www.genecards.org/cgi-bin/carddisp.pl?gene=DHRS4
Dhtkd1	dehydrogenase E1 and transketolase domain containing 1	C330018I04Rik	http://www.genecards.org/cgi-bin/carddisp.pl?gene=DHTKD1
Dnah1	dynein, axonemal, heavy chain 1	B230373P09Rik, Dnah, Dnahc1, E030034C22Rik, MDHC7	http://www.genecards.org/cgi-bin/carddisp.pl?gene=DNAH1
Dnah2	dynein, axonemal, heavy chain 2	2900022L05Rik, 4930564A01, D130094J20, D330014H01Rik, Dnah, Dnahc2, Dnhd, Dnhd3	http://www.genecards.org/cgi-bin/carddisp.pl?gene=DNAH2
Dnah3	dynein, axonemal, heavy chain 3	BC051401, Dnah, Dnahc3	http://www.genecards.org/cgi-bin/carddisp.pl?gene=DNAH3
Dnajb13	DnaJ heat shock protein family (Hsp40) member B13	1700014P03Rik, Tsarg	http://www.genecards.org/cgi-bin/carddisp.pl?gene=DNAJB13
Dnmbp	dynamin binding protein	2410003L07Rik, 2410003M15Rik, TUBA, Tub	http://www.genecards.org/cgi-bin/carddisp.pl?gene=DNMBP
Dpp10	dipeptidylpeptidase 10	6430601K09Rik, DP, DPP X, Dprp3	http://www.genecards.org/cgi-bin/carddisp.pl?gene=DPP10
Drap1	Dr1 associated protein 1 (negative cofactor 2 alpha)	2310074H19Rik, NC2-alpha	http://www.genecards.org/cgi-bin/carddisp.pl?gene=DRAP1
Drd1	dopamine receptor D1	C030036C15Rik, Drd, Drd-, Drd-1, Drd1a, Gpcr, Gpcr15	http://www.genecards.org/cgi-bin/carddisp.pl?gene=DRD1
Dtx1	deltex 1, E3 ubiquitin ligase	Fxit, Fxit1, mKIAA4160	http://www.genecards.org/cgi-bin/carddisp.pl?gene=DTX1
Dtx3	deltex 3, E3 ubiquitin ligase	Deltex3, mg310	http://www.genecards.org/cgi-bin/carddisp.pl?gene=DTX3
Dtx3l	deltex 3-like, E3 ubiquitin ligase	AU042200, BC023741	http://www.genecards.org/cgi-bin/carddisp.pl?gene=DTX3L
Dus4l	dihydrouridine synthase 4-like (S. cerevisiae)	2310069P03Rik, 2700089B10Rik, AI482040, Pp35	http://www.genecards.org/cgi-bin/carddisp.pl?gene=DUS4L
Dyrk2	dual-specificity tyrosine-(Y)-phosphorylation regulated kinase 2	1810038L18Rik	http://www.genecards.org/cgi-bin/carddisp.pl?gene=DYRK2
Eci1	enoyl-Coenzyme A delta isomerase 1	Dc, Dci, ec, eci	http://www.genecards.org/cgi-bin/carddisp.pl?gene=ECI1
Edc4	enhancer of mRNA decapping 4	BC022641	http://www.genecards.org/cgi-bin/carddisp.pl?gene=EDC4
Eef1d	eukaryotic translation elongation factor 1 delta (guanine nucleotide exchange protein)	EF-1-delta	http://www.genecards.org/cgi-bin/carddisp.pl?gene=EEF1D
Eef2kmt	eukaryotic elongation factor 2 lysine methyltransferase	5730409G15Rik, Fam8, Fam86, Fam86a, eEF2-KMT	http://www.genecards.org/cgi-bin/carddisp.pl?gene=EEF2KMT
Efhc1	EF-hand domain (C-terminal) containing 1	1700029F22Rik, mRib72, mRib72-1, myoc, myoclonin1	http://www.genecards.org/cgi-bin/carddisp.pl?gene=EFHC1
Efhc2	EF-hand domain (C-terminal) containing 2	4933407D04Rik, mRib72, mRib72-2	http://www.genecards.org/cgi-bin/carddisp.pl?gene=EFHC2
Ehhadh	enoyl-Coenzyme A, hydratase/3-hydroxyacyl Coenzyme A dehydrogenase	1300002P22Rik, HD, L-P, L-PBE, LBFP, LBP, MF, MFE1, MFP, MFP-1, MFP1, PBFE	http://www.genecards.org/cgi-bin/carddisp.pl?gene=EHHADH
Eif2ak4	eukaryotic translation initiation factor 2 alpha kinase 4	2610011M03, GCN, GCN2, MGCN2	http://www.genecards.org/cgi-bin/carddisp.pl?gene=EIF2AK4
Eml6	echinoderm microtubule associated protein like 6	2900083P10Rik, C230094A16Rik, EMAP-6	http://www.genecards.org/cgi-bin/carddisp.pl?gene=EML6
Engase	endo-beta-N-acetylglucosaminidase	C130099A03, D230014K01Rik	http://www.genecards.org/cgi-bin/carddisp.pl?gene=ENGASE
Enkd1	enkurin domain containing 1	AI606951, E130303B06Rik	http://www.genecards.org/cgi-bin/carddisp.pl?gene=ENKD1
Ephb1	Eph receptor B1	9330129L11, AW488255, C130099E04Rik, Cek6, El, Elk, Elkh, Hek6, Ne, Net	http://www.genecards.org/cgi-bin/carddisp.pl?gene=EPHB1
Eps15l1	epidermal growth factor receptor pathway substrate 15-like 1	9830147J04Rik, AI593686, Eps, Eps1, Eps15-rs, Eps15R	http://www.genecards.org/cgi-bin/carddisp.pl?gene=EPS15L1
Erap1	endoplasmic reticulum aminopeptidase 1	A-LAP, ARTS-1, Ar, Arts1, E, ERAAP, PILSA, PILSAP	http://www.genecards.org/cgi-bin/carddisp.pl?gene=ERAP1
Erg	ETS transcription factor	D030036I24Rik	http://www.genecards.org/cgi-bin/carddisp.pl?gene=ERG
Ermp1	endoplasmic reticulum metallopeptidase 1	D19Ertd410, D19Ertd410e, D19Wsu12, D19Wsu12e, Fxna, b2b2633C, b2b2633Clo, mKIAA1815	http://www.genecards.org/cgi-bin/carddisp.pl?gene=ERMP1
Ern1	endoplasmic reticulum (ER) to nucleus signalling 1	9030414B18Rik, AI225830, C85377, Ir, Ire, Ire1a, Ire1alpha, Ire1p	http://www.genecards.org/cgi-bin/carddisp.pl?gene=ERN1
Ern2	endoplasmic reticulum (ER) to nucleus signalling 2	Ern1, Ire, Ire1, Ire1b, ire1-beta, mIre1	http://www.genecards.org/cgi-bin/carddisp.pl?gene=ERN2
Esrp1	epithelial splicing regulatory protein 1	2210008M09Rik, A630065D16, BC031468, Rbm3, Rbm35a	http://www.genecards.org/cgi-bin/carddisp.pl?gene=ESRP1
Esrrg	estrogen-related receptor gamma	ER, ERR3, Errg, NR3, NR3B3, mKIAA0832	http://www.genecards.org/cgi-bin/carddisp.pl?gene=ESRRG
Exoc1	exocyst complex component 1	2810407P21Rik, A730011E05Rik, SEC, SEC3, Sec3l1, Sec3p	http://www.genecards.org/cgi-bin/carddisp.pl?gene=EXOC1
F11	coagulation factor XI	1600027G01Rik, AI503996, Cf11, FX, FXI, PTA	http://www.genecards.org/cgi-bin/carddisp.pl?gene=F11
F2r	coagulation factor II (thrombin) receptor	AI482343, Cf2, Cf2r, P, Par1, Th, ThrR	http://www.genecards.org/cgi-bin/carddisp.pl?gene=F2R
F5	coagulation factor V	AI173222, Cf-5, Cf5	http://www.genecards.org/cgi-bin/carddisp.pl?gene=F5
F8	coagulation factor VIII	Cf-8, Cf8, F, FVIII	http://www.genecards.org/cgi-bin/carddisp.pl?gene=F8
Faah	fatty acid amide hydrolase	AW412498	http://www.genecards.org/cgi-bin/carddisp.pl?gene=FAAH
Fabp3	fatty acid binding protein 3, muscle and heart	Fab, Fabp, Fabph, Fabph-1, Fabph-4, Fabph1, Fabph4, H-FA, H-FABP, Mdg, Mdgi	http://www.genecards.org/cgi-bin/carddisp.pl?gene=FABP3
Fabp6	fatty acid binding protein 6	GT, I, I-1, I-15P, I-B, I-BABP, IL, ILBP, ILBP3, Illbp	http://www.genecards.org/cgi-bin/carddisp.pl?gene=FABP6
Fads3	fatty acid desaturase 3	AI464531	http://www.genecards.org/cgi-bin/carddisp.pl?gene=FADS3
Fam102b	family with sequence similarity 102, member B	1600010D10Rik, B430201A12Rik	http://www.genecards.org/cgi-bin/carddisp.pl?gene=FAM102B
Fam117b	family with sequence similarity 117, member B	2810425F24Rik, 6330416D14Rik, Als2, Als2cr13	http://www.genecards.org/cgi-bin/carddisp.pl?gene=FAM117B
Fam120a	family with sequence similarity 120, member A	C9orf10, Ossa	http://www.genecards.org/cgi-bin/carddisp.pl?gene=FAM120A
Fam184b	family with sequence similarity 184, member B	9630031F12Rik, AB041544	http://www.genecards.org/cgi-bin/carddisp.pl?gene=FAM184B
Fam81a	family with sequence similarity 81, member A	6430514L14Rik	http://www.genecards.org/cgi-bin/carddisp.pl?gene=FAM81A
Farsa	phenylalanyl-tRNA synthetase, alpha subunit	0610012A19Rik, F, Farsla, pheRS	http://www.genecards.org/cgi-bin/carddisp.pl?gene=FARSA
Fat3	FAT atypical cadherin 3	9430076A06Rik, D430038H04Rik, Gm1132, Gm510, MFAT3F	http://www.genecards.org/cgi-bin/carddisp.pl?gene=FAT3
Faxc	failed axon connections homolog	6230409E13Rik, AW742931	http://www.genecards.org/cgi-bin/carddisp.pl?gene=FAXC
Fbf1	Fas (TNFRSF6) binding factor 1	1110033G01Rik, 5930413D20, mKIAA1863	http://www.genecards.org/cgi-bin/carddisp.pl?gene=FBF1
Fbln7	fibulin 7	1600015H20Rik, AI464334, TM14	http://www.genecards.org/cgi-bin/carddisp.pl?gene=FBLN7
Fbn1	fibrillin 1	AI536462, B430209H23, Fib-, Fib-1, Tsk	http://www.genecards.org/cgi-bin/carddisp.pl?gene=FBN1
Fbn2	fibrillin 2	BC063774, Fib-, Fib-2, mKIAA4226, s, sne, sy	http://www.genecards.org/cgi-bin/carddisp.pl?gene=FBN2
Fbxl20	F-box and leucine-rich repeat protein 20	2610511F20Rik, 4632423N09Rik, AI849362, AL117906, C86145, Fbl, Fbl2, S, Sc, Scr, mKIAA4147	http://www.genecards.org/cgi-bin/carddisp.pl?gene=FBXL20
Fbxo8	F-box protein 8	Fbx8	http://www.genecards.org/cgi-bin/carddisp.pl?gene=FBXO8
Fbxw10	F-box and WD-40 domain protein 10	Fbw10, HREP, SM25H, SM25H2, SM2S, SM2SH2	http://www.genecards.org/cgi-bin/carddisp.pl?gene=FBXW10
Fbxw5	F-box and WD-40 domain protein 5	AI159739, Fbw5	http://www.genecards.org/cgi-bin/carddisp.pl?gene=FBXW5
Fbxw7	F-box and WD-40 domain protein 7	1110001A17Rik, A, AGO, Cdc4, Fbw7, Fbwd6, Fbx30, Fbxo3, Fbxo30, Fbxw6, SEL-, SEL-10	http://www.genecards.org/cgi-bin/carddisp.pl?gene=FBXW7
Fgf12	fibroblast growth factor 12	AV114868, B230343J05R, B230343J05Rik, FGF-12, FHF-1, Fgf1a, Fhf1	http://www.genecards.org/cgi-bin/carddisp.pl?gene=FGF12
Fgf6	fibroblast growth factor 6	Fgf-6, Fgf7b, HSTF-2	http://www.genecards.org/cgi-bin/carddisp.pl?gene=FGF6
Fhod3	formin homology 2 domain containing 3	A930009H06Rik, FHOS2, mKIAA1695	http://www.genecards.org/cgi-bin/carddisp.pl?gene=FHOD3
Fibcd1	fibrinogen C domain containing 1	AI448887	http://www.genecards.org/cgi-bin/carddisp.pl?gene=FIBCD1
Fkbp6	FK506 binding protein 6	1700008G22Rik, 36kDa, AU017274, D5Ertd724, D5Ertd724e, FKBP-36, FKBP-6	http://www.genecards.org/cgi-bin/carddisp.pl?gene=FKBP6
Flvcr1	feline leukemia virus subgroup C cellular receptor 1	9630055N22Rik, FLVCR, Mfsd7, Mfsd7b	http://www.genecards.org/cgi-bin/carddisp.pl?gene=FLVCR1
Flvcr2	feline leukemia virus subgroup C cellular receptor 2	CCT, Mfsd7, Mfsd7c	http://www.genecards.org/cgi-bin/carddisp.pl?gene=FLVCR2
Fn1	fibronectin 1	E330027I09, F, Fn, Fn-, Fn-1	http://www.genecards.org/cgi-bin/carddisp.pl?gene=FN1
Folh1	folate hydrolase 1	GCP, GCP2, mo, mopsm	http://www.genecards.org/cgi-bin/carddisp.pl?gene=FOLH1
Foxj1	forkhead box J1	FKHL-1, FKHL-13, HFH-4, Hfh4	http://www.genecards.org/cgi-bin/carddisp.pl?gene=FOXJ1
Foxred1	FAD-dependent oxidoreductase domain containing 1	BC024806, TEG-23, Tex23	http://www.genecards.org/cgi-bin/carddisp.pl?gene=FOXRED1
Foxred2	FAD-dependent oxidoreductase domain containing 2	A430097D04Rik, D15Bwg0759e, Gm304	http://www.genecards.org/cgi-bin/carddisp.pl?gene=FOXRED2
Fth1	ferritin heavy polypeptide 1	FHC, Fth, H-fer, HFt, MFH	http://www.genecards.org/cgi-bin/carddisp.pl?gene=FTH1
Fut4	fucosyltransferase 4	AI451562, CD15, F, FAL, FucT-, FucT-IV, LeX, SSE, SSEA-1, Ss, Ssea1	http://www.genecards.org/cgi-bin/carddisp.pl?gene=FUT4
Fut9	fucosyltransferase 9	AI746471, AU067636, mFUT9, mFuc-TI, mFuc-TIX	http://www.genecards.org/cgi-bin/carddisp.pl?gene=FUT9
Fxn	frataxin	FA, FARR, Fr, Frda, X25	http://www.genecards.org/cgi-bin/carddisp.pl?gene=FXN
Fyn	Fyn proto-oncogene	AI448320, AW552119	http://www.genecards.org/cgi-bin/carddisp.pl?gene=FYN
Fzr1	fizzy and cell division cycle 20 related 1	AW108046, Cdh1, FZR, FZR2, Fy, Fyr, HCDH, HCDH1	http://www.genecards.org/cgi-bin/carddisp.pl?gene=FZR1
G6pdx	glucose-6-phosphate dehydrogenase X-linked	G28, G28A, G6p, G6pd, Gpd, Gpdx	http://www.genecards.org/cgi-bin/carddisp.pl?gene=G6PD
Gal3st1	galactose-3-O-sulfotransferase 1	Cs, Cst, Gcs, Gcst	http://www.genecards.org/cgi-bin/carddisp.pl?gene=GAL3ST1
Gal3st3	galactose-3-O-sulfotransferase 3		http://www.genecards.org/cgi-bin/carddisp.pl?gene=GAL3ST3
Galm	galactose mutarotase	A530057M15Rik, AU015645, AU020959	http://www.genecards.org/cgi-bin/carddisp.pl?gene=GALM
Galns	galactosamine (N-acetyl)-6-sulfate sulfatase	mFLJ00319	http://www.genecards.org/cgi-bin/carddisp.pl?gene=GALNS
Gas8	growth arrest specific 8	Gas, Gas11	http://www.genecards.org/cgi-bin/carddisp.pl?gene=GAS8
Gata2	GATA binding protein 2	Gata, Gata-2	http://www.genecards.org/cgi-bin/carddisp.pl?gene=GATA2
Gcat	glycine C-acetyltransferase (2-amino-3-ketobutyrate-coenzyme A ligase)	AI526977, Kb, Kbl	http://www.genecards.org/cgi-bin/carddisp.pl?gene=GCAT
Gdi2	guanosine diphosphate (GDP) dissociation inhibitor 2	GDI, GDI-, GDI-B, GDIB, Gdi3	http://www.genecards.org/cgi-bin/carddisp.pl?gene=GDI2
Ggt1	gamma-glutamyltransferase 1	CD224, GGT, GGT 1, GGT-1, Ggtp, dwg	http://www.genecards.org/cgi-bin/carddisp.pl?gene=GGT1
Ghsr	growth hormone secretagogue receptor	C530020I22Rik, GHRP, GHS-R, Ghs, Ghsr1a	http://www.genecards.org/cgi-bin/carddisp.pl?gene=GHSR
Gin1	gypsy retrotransposon integrase 1	4930429M06Rik, 8430411H10Rik, Gin-1, Zh2c2	http://www.genecards.org/cgi-bin/carddisp.pl?gene=GIN1
Gja4	gap junction protein, alpha 4	AU020209, AW558810, Cnx3, Cnx37, Cx37, Cxnh1, Gja-, Gja-4	http://www.genecards.org/cgi-bin/carddisp.pl?gene=GJA4
Gjc1	gap junction protein, gamma 1	C130009G16Rik, Cnx45, Cx45, Cxnq, Gja, Gja-, Gja-7, Gja7	http://www.genecards.org/cgi-bin/carddisp.pl?gene=GJC1
Gjd2	gap junction protein, delta 2	Cxns, Gja, Gja9, conne, connexin36, cx36	http://www.genecards.org/cgi-bin/carddisp.pl?gene=GJD2
Glipr2	GLI pathogenesis-related 2	5730414A08Rik, C77180, GAP, GAPR-1	http://www.genecards.org/cgi-bin/carddisp.pl?gene=GLIPR2
Glud1	glutamate dehydrogenase 1	AI118167, Gdh-X, Glu, Glud, Gludl	http://www.genecards.org/cgi-bin/carddisp.pl?gene=GLUD1
Gm7168	predicted gene 7168	EG635895
Gmnn	geminin	AW546347, Gem	http://www.genecards.org/cgi-bin/carddisp.pl?gene=GMNN
Gnaz	guanine nucleotide binding protein, alpha z subunit	AI847979, Gz	http://www.genecards.org/cgi-bin/carddisp.pl?gene=GNAZ
Gnpda1	glucosamine-6-phosphate deaminase 1	G, GNPDA, Gn, Gnp1, Gnpi, o, oscillin	http://www.genecards.org/cgi-bin/carddisp.pl?gene=GNPDA1
Golga4	golgi autoantigen, golgin subfamily a, 4	AI225887, AU019508, Ol, Olp-1, golgin	http://www.genecards.org/cgi-bin/carddisp.pl?gene=GOLGA4
Gosr2	golgi SNAP receptor complex member 2	2310032N09Rik, C76855, GS2, Gs27, S, SNARE, memb, membrin	http://www.genecards.org/cgi-bin/carddisp.pl?gene=GOSR2
Got1	glutamic-oxaloacetic transaminase 1, soluble	AI789014, Got-, Got-1, cA, cAspAT, cCAT	http://www.genecards.org/cgi-bin/carddisp.pl?gene=GOT1
Gp2	glycoprotein 2 (zymogen granule membrane)	2310037I18Rik, AV060639	http://www.genecards.org/cgi-bin/carddisp.pl?gene=GP2
Gpx6	glutathione peroxidase 6	1700020G18Rik, Ry2d1, olfa, olfactory	http://www.genecards.org/cgi-bin/carddisp.pl?gene=GPX6
Gria4	glutamate receptor, ionotropic, AMPA4 (alpha 4)	Glu, GluA4, GluR-D, Glur, Glur-4, Glur4, Gluralpha4, spk, spkw1	http://www.genecards.org/cgi-bin/carddisp.pl?gene=GRIA4
Grid1	glutamate receptor, ionotropic, delta 1	GluD1, GluRde, GluRdelta1	http://www.genecards.org/cgi-bin/carddisp.pl?gene=GRID1
Gsn	gelsolin	ADF	http://www.genecards.org/cgi-bin/carddisp.pl?gene=GSN
Gstm1	glutathione S-transferase, mu 1	Gstb, Gstb-, Gstb-1, Gstb1	http://www.genecards.org/cgi-bin/carddisp.pl?gene=GSTM1
Gstm3	glutathione S-transferase, mu 3	Fsc, Fsc2, mGSTM, mGSTM5	http://www.genecards.org/cgi-bin/carddisp.pl?gene=GSTM3
Gstp1	glutathione S-transferase, pi 1	Gst, GstpiB	http://www.genecards.org/cgi-bin/carddisp.pl?gene=GSTP1
Gstt2	glutathione S-transferase, theta 2	AI266894, Y, Yrs, mGSTT, mGSTT2	http://www.genecards.org/cgi-bin/carddisp.pl?gene=GSTT2
Gstt3	glutathione S-transferase, theta 3	AI118089
Gstt4	glutathione S-transferase, theta 4	4930583C14Rik, AI507011	http://www.genecards.org/cgi-bin/carddisp.pl?gene=GSTT4
Gtf2h3	general transcription factor IIH, polypeptide 3	34kD, 34kDa, 5033417D07Rik, BTF2, BTF2 p34, C730029A10, D5Ertd679, D5Ertd679e, TFIIH	http://www.genecards.org/cgi-bin/carddisp.pl?gene=GTF2H3
Gtpbp6	GTP binding protein 6 (putative)	AV119224, Pg, Pgbpll, p, pgpl	http://www.genecards.org/cgi-bin/carddisp.pl?gene=GTPBP6
Gucy1b1	guanylate cyclase 1, soluble, beta 1	GC-S-beta-1, GCbeta1, Gucy1b3	http://www.genecards.org/cgi-bin/carddisp.pl?gene=GUCY1B1
Guk1	guanylate kinase 1	AA409738, AL033299, AL033300, AV026611, Gmk, Guk-1	http://www.genecards.org/cgi-bin/carddisp.pl?gene=GUK1
Gxylt2	glucoside xylosyltransferase 2	Glt8d, Glt8d4, Gm152	http://www.genecards.org/cgi-bin/carddisp.pl?gene=GXYLT2
Hao1	hydroxyacid oxidase 1, liver	GO, GOX, Gox1, Hao, Hao-1	http://www.genecards.org/cgi-bin/carddisp.pl?gene=HAO1
Harbi1	harbinger transposase derived 1	D230010M03Rik	http://www.genecards.org/cgi-bin/carddisp.pl?gene=HARBI1
Hcn2	hyperpolarization-activated, cyclic nucleotide-gated K+ 2	BCNG2, HAC, HAC1, t, trls	http://www.genecards.org/cgi-bin/carddisp.pl?gene=HCN2
Heatr5b	HEAT repeat containing 5B	2010013B10Rik, A230048G03Rik, AV071430, D330050P16Rik, mKIAA1414	http://www.genecards.org/cgi-bin/carddisp.pl?gene=HEATR5B
Hebp2	heme binding protein 2	S, SOUL	http://www.genecards.org/cgi-bin/carddisp.pl?gene=HEBP2
Hectd1	HECT domain E3 ubiquitin protein ligase 1	A630086P08Rik, AI844876, b2b327C, b2b327Clo, o, opm	http://www.genecards.org/cgi-bin/carddisp.pl?gene=HECTD1
Helz2	helicase with zinc finger 2, transcriptional coactivator	PDIP1, Pric285, mKIAA1769, mPDIP1	http://www.genecards.org/cgi-bin/carddisp.pl?gene=HELZ2
Herc4	hect domain and RLD 4	1700056O17Rik, 4921531D01Rik, 9530080M15Rik, mKIAA1593	http://www.genecards.org/cgi-bin/carddisp.pl?gene=HERC4
Hhipl2	hedgehog interacting protein-like 2	4930507C10Rik, AW208802, Hhip3	http://www.genecards.org/cgi-bin/carddisp.pl?gene=HHIPL2
Hif1an	hypoxia-inducible factor 1, alpha subunit inhibitor	2310046M24Rik, A830014H24Rik, FI, FIH, FIH1	http://www.genecards.org/cgi-bin/carddisp.pl?gene=HIF1AN
Hmcn1	hemicentin 1	EG545370, FIBL-6, Gm201	http://www.genecards.org/cgi-bin/carddisp.pl?gene=HMCN1
Hmcn2	hemicentin 2	D030068H01	http://www.genecards.org/cgi-bin/carddisp.pl?gene=HMCN2
Hnrnpa1	heterogeneous nuclear ribonucleoprotein A1	D15Ertd119, HDP-1, Hd, Hdp, Hnrpa1, hn, hnRNP A1, hnrnp-A1	http://www.genecards.org/cgi-bin/carddisp.pl?gene=HNRNPA1
Hpse	heparanase	H, HSE1, Hpa, Hpr1	http://www.genecards.org/cgi-bin/carddisp.pl?gene=HPSE
Hs3st2	heparan sulfate (glucosamine) 3-O-sulfotransferase 2	6430516N12Rik, A830061E14Rik, AW491345	http://www.genecards.org/cgi-bin/carddisp.pl?gene=HS3ST2
Hs3st3b1	heparan sulfate (glucosamine) 3-O-sulfotransferase 3B1	3-OST-, 3-OST-3B, 3OST3, 3OST3B1, 3Ost, 3Ost3b, AU041882, AW536289, HS3ST3, Hs3st3b, m3-OST-, m3-OST-3B	http://www.genecards.org/cgi-bin/carddisp.pl?gene=HS3ST3B1
Hs3st5	heparan sulfate (glucosamine) 3-O-sulfotransferase 5	D930005L05Rik, Gm1151, Hs3ost5	http://www.genecards.org/cgi-bin/carddisp.pl?gene=HS3ST5
Hs6st1	heparan sulfate 6-O-sulfotransferase 1	6OS, 6Ost1	http://www.genecards.org/cgi-bin/carddisp.pl?gene=HS6ST1
Hsd17b12	hydroxysteroid (17-beta) dehydrogenase 12	2610510O05Rik, AI172963, KIK, KIK-I, Kik1	http://www.genecards.org/cgi-bin/carddisp.pl?gene=HSD17B12
Hsd3b7	hydroxy-delta-5-steroid dehydrogenase, 3 beta- and steroid delta-isomerase 7	AI195443, BB098564	http://www.genecards.org/cgi-bin/carddisp.pl?gene=HSD3B7
Hspa12a	heat shock protein 12A	1700063D12Rik, AI118035, AI840429, AW048913, AW556406, D5Mgi4, D5Mgi40, Gm19925, Hsp, mKIAA0417	http://www.genecards.org/cgi-bin/carddisp.pl?gene=HSPA12A
Hspa2	heat shock protein 2	70kD, 70kDa, HSP70.2, HSP70A2, Hsp70, Hsp70-2	http://www.genecards.org/cgi-bin/carddisp.pl?gene=HSPA2
Hspa8	heat shock protein 8	2410008N15Rik, Hsc7, Hsc70, Hsc71, Hsc73, Hsp, Hsp73, Hspa10	http://www.genecards.org/cgi-bin/carddisp.pl?gene=HSPA8
Hspb1	heat shock protein 1	27kDa, Hsp, Hsp25	http://www.genecards.org/cgi-bin/carddisp.pl?gene=HSPB1
Htr3a	5-hydroxytryptamine (serotonin) receptor 3A	5-HT3, 5-HT3A, 5-HT3R	http://www.genecards.org/cgi-bin/carddisp.pl?gene=HTR3A
Htt	huntingtin	AI256365, C430023I11Rik, Hd, Hdh, IT1, IT15, hunti	http://www.genecards.org/cgi-bin/carddisp.pl?gene=HTT
Hyal4	hyaluronoglucosaminidase 4	4632428M18Rik, CSHY	http://www.genecards.org/cgi-bin/carddisp.pl?gene=HYAL4
Ifi30	interferon gamma inducible protein 30	GI, GILT, IP, IP30	http://www.genecards.org/cgi-bin/carddisp.pl?gene=IFI30
Igfals	insulin-like growth factor binding protein, acid labile subunit	A, ALS, Albs	http://www.genecards.org/cgi-bin/carddisp.pl?gene=IGFALS
Ikzf2	IKAROS family zinc finger 2	A730095J18Rik, He, Helios, Zfpn, Zfpn1a2, Znfn1a2	http://www.genecards.org/cgi-bin/carddisp.pl?gene=IKZF2
Impa1	inositol (myo)-1(or 4)-monophosphatase 1	2610002K09Rik, 2900059K10Rik, AI325909	http://www.genecards.org/cgi-bin/carddisp.pl?gene=IMPA1
Ing3	inhibitor of growth family, member 3	1300013A07Rik, P47I, P47ING3	http://www.genecards.org/cgi-bin/carddisp.pl?gene=ING3
Inip	INTS3 and NABP interacting protein	1110054O05Rik, 2610312O17Rik, AA399876, Ssbip1	http://www.genecards.org/cgi-bin/carddisp.pl?gene=INIP
Ipp	IAP promoted placental gene	D4Jhu8, M, Mipp	http://www.genecards.org/cgi-bin/carddisp.pl?gene=IPP
Iqgap1	IQ motif containing GTPase activating protein 1	AA682088, D7Ertd237, D7Ertd237e, D7Ertd257, D7Ertd257e, mKIAA0051	http://www.genecards.org/cgi-bin/carddisp.pl?gene=IQGAP1
Itgam	integrin alpha M	CD11b/CD18, CR, CR3, CR3A, Cd11b, F730045J24Rik, Ly-4, Ly-40, MAC1, Mac-, Mac-1, Mac-1a	http://www.genecards.org/cgi-bin/carddisp.pl?gene=ITGAM
Itgb1	integrin beta 1 (fibronectin receptor beta)	4633401G24Rik, AA409975, AA960159, CD29, Fn, Fnrb, Gm9863, gpIIa	http://www.genecards.org/cgi-bin/carddisp.pl?gene=ITGB1
Itln1	intelectin 1 (galactofuranose binding)	I, IntL, It, Itln, Itln2, Itln3, Itln5, Itlna, Lfr, mL	http://www.genecards.org/cgi-bin/carddisp.pl?gene=ITLN1
Jmjd7	jumonji domain containing 7		http://www.genecards.org/cgi-bin/carddisp.pl?gene=JMJD7
Jrk	jerky		http://www.genecards.org/cgi-bin/carddisp.pl?gene=JRK
Katnal2	katanin p60 subunit A-like 2	3110023G01Rik, 4933439B08Rik	http://www.genecards.org/cgi-bin/carddisp.pl?gene=KATNAL2
Kcnab2	potassium voltage-gated channel, shaker-related subfamily, beta member 2	F5, I2r, I2rf5, Kcnb, Kcnb3, kv-beta-2	http://www.genecards.org/cgi-bin/carddisp.pl?gene=KCNAB2
Kcnk2	potassium channel, subfamily K, member 2	A430027H14Rik, AI848635, TREK-, TREK-1	http://www.genecards.org/cgi-bin/carddisp.pl?gene=KCNK2
Kcnq1	potassium voltage-gated channel, subfamily Q, member 1	AW559127, KVLQ, KVLQT1, Kcn, Kcna9	http://www.genecards.org/cgi-bin/carddisp.pl?gene=KCNQ1
Kdm1a	lysine (K)-specific demethylase 1A	1810043O07Rik, AA408884, Ao, Aof2, D4Ertd478e, Kdm1, LS, Lsd1, mKIAA0601	http://www.genecards.org/cgi-bin/carddisp.pl?gene=KDM1A
Kdm8	lysine (K)-specific demethylase 8	3110005O21Rik, Jmjd5	http://www.genecards.org/cgi-bin/carddisp.pl?gene=KDM8
Keap1	kelch-like ECH-associated protein 1	IN, INRF2, mKIAA0132	http://www.genecards.org/cgi-bin/carddisp.pl?gene=KEAP1
Kif13a	kinesin family member 13A	4930505I07Rik, mKIAA4109	http://www.genecards.org/cgi-bin/carddisp.pl?gene=KIF13A
Klf5	Kruppel-like factor 5	4930520J07Rik, Bteb2, CKL, CKLF, IK, IKLF	http://www.genecards.org/cgi-bin/carddisp.pl?gene=KLF5
Klhl1	kelch-like 1	mKIAA1490	http://www.genecards.org/cgi-bin/carddisp.pl?gene=KLHL1
Klhl11	kelch-like 11	BC011167	http://www.genecards.org/cgi-bin/carddisp.pl?gene=KLHL11
Klhl12	kelch-like 12	C3i, C3ip1	http://www.genecards.org/cgi-bin/carddisp.pl?gene=KLHL12
Klhl17	kelch-like 17	AL022703, BC058738, act	http://www.genecards.org/cgi-bin/carddisp.pl?gene=KLHL17
Klhl18	kelch-like 18	A930041K15, AW545966	http://www.genecards.org/cgi-bin/carddisp.pl?gene=KLHL18
Klhl2	kelch-like 2, Mayven	6030411N21Rik, 8530402H02Rik, ABP-KE, ABP-KELCH, AU020744, M, Mav	http://www.genecards.org/cgi-bin/carddisp.pl?gene=KLHL2
Klhl20	kelch-like 20	AI504637, D930050H05Rik, Kleip, mKIAA4210	http://www.genecards.org/cgi-bin/carddisp.pl?gene=KLHL20
Klhl21	kelch-like 21	1810045K06Rik, D330008A20, mKIAA0469	http://www.genecards.org/cgi-bin/carddisp.pl?gene=KLHL21
Klhl23	kelch-like 23	C130068N17Rik	http://www.genecards.org/cgi-bin/carddisp.pl?gene=KLHL23
Klhl24	kelch-like 24	1110046J11Rik, 4930429H24Rik, 6530402O20Rik, C85082	http://www.genecards.org/cgi-bin/carddisp.pl?gene=KLHL24
Klhl28	kelch-like 28	2810440N09Rik, 4122402F11Rik, 4931401E10Rik, Btbd5	http://www.genecards.org/cgi-bin/carddisp.pl?gene=KLHL28
Klhl3	kelch-like 3	7530408C15Rik, AI430941, EG627648	http://www.genecards.org/cgi-bin/carddisp.pl?gene=KLHL3
Klhl30	kelch-like 30	4631423F02Rik	http://www.genecards.org/cgi-bin/carddisp.pl?gene=KLHL30
Klhl41	kelch-like 41	Gm112, Kbtbd10, SARCOSIN	http://www.genecards.org/cgi-bin/carddisp.pl?gene=KLHL41
Klhl9	kelch-like 9	8030469P05, C530050O22Rik, mKIAA1354	http://www.genecards.org/cgi-bin/carddisp.pl?gene=KLHL9
Klk1	kallikrein 1	0610007D04Rik, KAL-B, Kal, Klk, Klk1b6, Klk6, mGk-6	http://www.genecards.org/cgi-bin/carddisp.pl?gene=KLK1
Kpna2	karyopherin (importin) alpha 2	2410044B12Rik, IPOA1, PTAC58, Rch, Rch1, m-im, pen	http://www.genecards.org/cgi-bin/carddisp.pl?gene=KPNA2
Lcmt2	leucine carboxyl methyltransferase 2	D330024M17, Tyw4	http://www.genecards.org/cgi-bin/carddisp.pl?gene=LCMT2
Lgals6	lectin, galactose binding, soluble 6	galect, galectin-6
Lgr5	leucine rich repeat containing G protein coupled receptor 5	FEX, Gpr, Gpr49	http://www.genecards.org/cgi-bin/carddisp.pl?gene=LGR5
Lig3	ligase III, DNA, ATP-dependent	D11Wsu78, D11Wsu78e	http://www.genecards.org/cgi-bin/carddisp.pl?gene=LIG3
Lmna	lamin A	Dhe	http://www.genecards.org/cgi-bin/carddisp.pl?gene=LMNA
Lrba	LPS-responsive beige-like anchor	C80285, D3Ertd775, D3Ertd775e, L, Lab300, Lba	http://www.genecards.org/cgi-bin/carddisp.pl?gene=LRBA
Lrfn4	leucine rich repeat and fibronectin type III domain containing 4	BC023156, SA, Salm3	http://www.genecards.org/cgi-bin/carddisp.pl?gene=LRFN4
Lrig3	leucine-rich repeats and immunoglobulin-like domains 3	9030421L11Rik, 9130004I02Rik, 9430095K15Rik, mKIAA3016	http://www.genecards.org/cgi-bin/carddisp.pl?gene=LRIG3
Lrp1	low density lipoprotein receptor-related protein 1	A2, A2mr, AI316852, CD91, Lrp, b2b1554C, b2b1554Clo	http://www.genecards.org/cgi-bin/carddisp.pl?gene=LRP1
Lrp1b	low density lipoprotein-related protein 1B	9630004P12Rik, LRP-DIT	http://www.genecards.org/cgi-bin/carddisp.pl?gene=LRP1B
Lrp2	low density lipoprotein receptor-related protein 2	AI315343, AW536255, D230004K18Rik, Gp33, Gp330, Meg, Megalin, b2b1625.2Clo	http://www.genecards.org/cgi-bin/carddisp.pl?gene=LRP2
Lrrc15	leucine rich repeat containing 15	5430427N11Rik, LIB	http://www.genecards.org/cgi-bin/carddisp.pl?gene=LRRC15
Lrrc23	leucine rich repeat containing 23	4921537K05Rik, B7, Lr, Lrpb7	http://www.genecards.org/cgi-bin/carddisp.pl?gene=LRRC23
Lrrc34	leucine rich repeat containing 34	1700007J06Rik, SPATA34	http://www.genecards.org/cgi-bin/carddisp.pl?gene=LRRC34
Lrrd1	leucine rich repeats and death domain containing 1	4932412H11Rik	http://www.genecards.org/cgi-bin/carddisp.pl?gene=LRRD1
Lrriq3	leucine-rich repeats and IQ motif containing 3	4930438B07Rik, 4930511J15Rik, 4933403H06Rik, BB020367, Lrr, Lrrc44	http://www.genecards.org/cgi-bin/carddisp.pl?gene=LRRIQ3
Ltbp4	latent transforming growth factor beta binding protein 4	2310046A13Rik	http://www.genecards.org/cgi-bin/carddisp.pl?gene=LTBP4
Lyg2	lysozyme G-like 2	Gm776	http://www.genecards.org/cgi-bin/carddisp.pl?gene=LYG2
Mad1l1	MAD1 mitotic arrest deficient 1-like 1	AI173502, AW550425, Mad, Mad1	http://www.genecards.org/cgi-bin/carddisp.pl?gene=MAD1L1
Madd	MAP-kinase activating death domain	9630059K23Rik, IG20	http://www.genecards.org/cgi-bin/carddisp.pl?gene=MADD
Mael	maelstrom spermatogenic transposon silencer	4933405K18Rik, AU019877	http://www.genecards.org/cgi-bin/carddisp.pl?gene=MAEL
Mafk	v-maf musculoaponeurotic fibrosarcoma oncogene family, protein K (avian)	AW061068, NF-E, NF-E2, Nfe2, Nfe2u	http://www.genecards.org/cgi-bin/carddisp.pl?gene=MAFK
Map3k12	mitogen-activated protein kinase kinase kinase 12	DL, DLK, MUK, Zp, Zpk	http://www.genecards.org/cgi-bin/carddisp.pl?gene=MAP3K12
Map3k19	mitogen-activated protein kinase kinase kinase 19	Ysk, Ysk4	http://www.genecards.org/cgi-bin/carddisp.pl?gene=MAP3K19
Map3k2	mitogen-activated protein kinase kinase kinase 2	9630061B06Rik, AI585793, Mekk2, Mekk2b	http://www.genecards.org/cgi-bin/carddisp.pl?gene=MAP3K2
Map3k3	mitogen-activated protein kinase kinase kinase 3	AW548911, MAPKK, MAPKKK3, Mekk3, mKIAA4031	http://www.genecards.org/cgi-bin/carddisp.pl?gene=MAP3K3
Mapk8ip1	mitogen-activated protein kinase 8 interacting protein 1	IB, IB1, JIP, JIP-1, Ji, Jip1, MAPK, Prk, Prkm8ip, S, Skip, mjip, mjip-2a	http://www.genecards.org/cgi-bin/carddisp.pl?gene=MAPK8IP1
Marchf7	membrane associated ring-CH-type finger 7	Ax, Axo, Axot, Gtrgeo, Gtrgeo17, Marc, March7	http://www.genecards.org/cgi-bin/carddisp.pl?gene=MARCHF7
Masp2	mannan-binding lectin serine peptidase 2	MAS, MASP-2, MAp, MAp19	http://www.genecards.org/cgi-bin/carddisp.pl?gene=MASP2
Mbl2	mannose-binding lectin (protein C) 2	L-MBP, MB, MBL, MBL-, MBL-C, MBP-, MBP-C, RARF/P28A	http://www.genecards.org/cgi-bin/carddisp.pl?gene=MBL2
Mcf2l	mcf.2 transforming sequence-like	C130040G20Rik, Db, Dbs, Ost, mKIAA0362	http://www.genecards.org/cgi-bin/carddisp.pl?gene=MCF2L
Mcm3ap	minichromosome maintenance complex component 3 associated protein	G, GANP	http://www.genecards.org/cgi-bin/carddisp.pl?gene=MCM3AP
Mdga2	MAM domain containing glycosylphosphatidylinositol anchor 2	6720489L24Rik, 9330209L04Rik, A, Adp, Mamdc, Mamdc1, Mdga, Tg(Prnp-PFN1*G118V)838Kiaei	http://www.genecards.org/cgi-bin/carddisp.pl?gene=MDGA2
Mdh1	malate dehydrogenase 1, NAD (soluble)	B230377B03Rik, D17921, MDH-, MDH-s, MDHA, Mo, Mor, Mor-2, Mor2	http://www.genecards.org/cgi-bin/carddisp.pl?gene=MDH1
Mecom	MDS1 and EVI1 complex locus	D630039M04Rik, Ev, Evi, Evi-1, Evi1, Jb, Jbo, MDS1-E, Mds, Mds1, Mds1-Evi1, Prd, Prdm3, ZNFPR, Znfpr1b1	http://www.genecards.org/cgi-bin/carddisp.pl?gene=MECOM
Megf8	multiple EGF-like-domains 8	AW049492, Egfl, Egfl4, b2b1702.2Clo, b2b1702C, b2b1702Clo, b2b288C, b2b288Clo, m687Ddg, mKIAA0817	http://www.genecards.org/cgi-bin/carddisp.pl?gene=MEGF8
Meis2	Meis homeobox 2	A430109D20Rik, Mei, Mrg, Mrg1, Str, Stra10	http://www.genecards.org/cgi-bin/carddisp.pl?gene=MEIS2
Mep1a	meprin 1 alpha	AI098089, AW107200, Mep, Mep-, Mep-1, Mep-1a, Mep1	http://www.genecards.org/cgi-bin/carddisp.pl?gene=MEP1A
Mep1b	meprin 1 beta	Mep-1, Mep-1b	http://www.genecards.org/cgi-bin/carddisp.pl?gene=MEP1B
Mfge8	milk fat globule EGF and factor V/VIII domain containing	AA408458, AI325141, MFG-E8, MP47, Mfgm, P47, SED, SED1, lacta, lactadherin	http://www.genecards.org/cgi-bin/carddisp.pl?gene=MFGE8
Mfsd12	major facilitator superfamily domain containing 12	C19orf28, F630110N24Rik, Wdt1, g, gr	http://www.genecards.org/cgi-bin/carddisp.pl?gene=MFSD12
Mgat5	mannoside acetylglucosaminyltransferase 5	4930471A21Rik, 5330407H02Rik, AI480971, GlcNA, GlcNAc-TV	http://www.genecards.org/cgi-bin/carddisp.pl?gene=MGAT5
Mgll	monoglyceride lipase	AA589436, Ma, Magl, Mgl	http://www.genecards.org/cgi-bin/carddisp.pl?gene=MGLL
Mipol1	mirror-image polydactyly 1	1700081O04Rik, 6030439O22Rik, AU021838, AW536152, D12Ertd19, D12Ertd19e	http://www.genecards.org/cgi-bin/carddisp.pl?gene=MIPOL1
Mmd	monocyte to macrophage differentiation-associated	1200017E07Rik, 1810073C06Rik, AA690185	http://www.genecards.org/cgi-bin/carddisp.pl?gene=MMD
Mnt	max binding protein	R, Rox, bHLHd, bHLHd3	http://www.genecards.org/cgi-bin/carddisp.pl?gene=MNT
Mocs3	molybdenum cofactor synthesis 3	1700020H17Rik, Uba, Uba4	http://www.genecards.org/cgi-bin/carddisp.pl?gene=MOCS3
Mok	MOK protein kinase	MO, RAGE1, Ra, Rage, Stk3, Stk30	http://www.genecards.org/cgi-bin/carddisp.pl?gene=MOK
Morn5	MORN repeat containing 5	1700010A17Rik	http://www.genecards.org/cgi-bin/carddisp.pl?gene=MORN5
Mov10	Mov10 RISC complex RNA helicase	C77703, Mov-, Mov-10	http://www.genecards.org/cgi-bin/carddisp.pl?gene=MOV10
Moxd1	monooxygenase, DBH-like 1	3230402N08Rik, MNCb-5203	http://www.genecards.org/cgi-bin/carddisp.pl?gene=MOXD1
Mpc2	mitochondrial pyruvate carrier 2	0610006C01Rik, 2010002I07Rik, 2610205H19Rik, AA108335, Brp, Brp44, ESTM4, ESTM43	http://www.genecards.org/cgi-bin/carddisp.pl?gene=MPC2
Mpp2	membrane protein, palmitoylated 2 (MAGUK p55 subfamily member 2)	D11Bwg0652e, Dlg, Dlg2, Dlgh, Dlgh2, P, Pals4	http://www.genecards.org/cgi-bin/carddisp.pl?gene=MPP2
Mrc1	mannose receptor, C type 1	AW259686, CD206, M, MR	http://www.genecards.org/cgi-bin/carddisp.pl?gene=MRC1
Mrc2	mannose receptor, C type 2	Endo1, Endo180, mKIAA0709, u, uPARAP	http://www.genecards.org/cgi-bin/carddisp.pl?gene=MRC2
Mrtfb	myocardin related transcription factor B	Gt4-1, MRTF-, MRTF-B, Mkl, Mkl2, Mrtf, mKIAA1243	http://www.genecards.org/cgi-bin/carddisp.pl?gene=MRTFB
Msantd3	Myb/SANT-like DNA-binding domain containing 3	2410046L14Rik, 2810429P03Rik, 5730528L13Rik, Mysantd3	http://www.genecards.org/cgi-bin/carddisp.pl?gene=MSANTD3
Msi2	musashi RNA-binding protein 2	1700105C15Rik, AI451722, AI563628, AW489193, Msi2h, Musa, msi	http://www.genecards.org/cgi-bin/carddisp.pl?gene=MSI2
Msra	methionine sulfoxide reductase A	2310045J23Rik, 6530413P12Rik, MS, MSR-A	http://www.genecards.org/cgi-bin/carddisp.pl?gene=MSRA
Msx3	msh homeobox 3	AI323377
Mta1	metastasis associated 1		http://www.genecards.org/cgi-bin/carddisp.pl?gene=MTA1
Mthfd2	methylenetetrahydrofolate dehydrogenase (NAD+ dependent), methenyltetrahydrofolate cyclohydrolase	AW558851, NMDM, NMDMC	http://www.genecards.org/cgi-bin/carddisp.pl?gene=MTHFD2
Mtrex	Mtr4 exosome RNA helicase	2610528A15Rik, Ski, Skiv2l2, mKIAA0052	http://www.genecards.org/cgi-bin/carddisp.pl?gene=MTREX
Mvb12b	multivesicular body subunit 12B	2610200O14Rik, 2610528K11Rik, AI414895, Fam125, Fam125b	http://www.genecards.org/cgi-bin/carddisp.pl?gene=MVB12B
Mycbp	MYC binding protein	5730488M09Rik, AW552132, AW742590, Amy-, Amy-1	http://www.genecards.org/cgi-bin/carddisp.pl?gene=MYCBP
Mycbpap	MYCBP associated protein	4932408B01Rik, AMA, AMAP-1, AW125474	http://www.genecards.org/cgi-bin/carddisp.pl?gene=MYCBPAP
Myh6	myosin, heavy polypeptide 6, cardiac muscle, alpha	A830009F23Rik, AA517445, Myhc, Myhc-, Myhc-a, Myhca, alph, alpha-MHC, alphaMHC	http://www.genecards.org/cgi-bin/carddisp.pl?gene=MYH6
Mylk	myosin, light polypeptide kinase	9530072E15Rik, A930019C19Rik, AW489456, KRP, MLCK10, MLCK108, MLCK21, MLCK210, Mlc, Mlck, nmMl, nmMlck, smMLCK, tel	http://www.genecards.org/cgi-bin/carddisp.pl?gene=MYLK
Myo1c	myosin IC	C80397, MMIb, MYO1E, NMI, mm1bet, mm1beta, myr, myr2	http://www.genecards.org/cgi-bin/carddisp.pl?gene=MYO1C
Myo1e	myosin IE	2310020N23Rik, 9130023P14Rik, AA407778, myosin-1e, myr 3	http://www.genecards.org/cgi-bin/carddisp.pl?gene=MYO1E
Myof	myoferlin	2310004N10Rik, 2310051D19Rik, E030042N20Rik, Fer1, Fer1l3	http://www.genecards.org/cgi-bin/carddisp.pl?gene=MYOF
Myom3	myomesin family, member 3	8430427K15Rik, Gm434	http://www.genecards.org/cgi-bin/carddisp.pl?gene=MYOM3
Myorg	myogenesis regulating glycosidase (putative)	AA408153, AI4641, AI464131, AI604836, Gm762, Kiaa1161, NET3, NET37	http://www.genecards.org/cgi-bin/carddisp.pl?gene=MYORG
Myt1l	myelin transcription factor 1-like	2900046C06Rik, 2900093J19Rik, C630034G21Rik, Nztf, Nztf1, Pmn, Pmng1, Png, Png-1, mKIAA1106	http://www.genecards.org/cgi-bin/carddisp.pl?gene=MYT1L
Naalad2	N-acetylated alpha-linked acidic dipeptidase 2	2700022G20Rik, D9Ertd285, D9Ertd285e, Folh, Folh1b, GC, GCP, GCP3, GCPIII, NAA, NAADALASE2, NAALADASE2	http://www.genecards.org/cgi-bin/carddisp.pl?gene=NAALAD2
Nadsyn1	NAD synthetase 1	9130012B15Rik	http://www.genecards.org/cgi-bin/carddisp.pl?gene=NADSYN1
Naip5	NLR family, apoptosis inhibitory protein 5	Birc, Birc1e, Lg, Lgn1, Na, Naip-rs3
Nav3	neuron navigator 3	4732483H20Rik, 9630020C08Rik, POM, POMFIL1, Pomfil1p, mKIAA0938, unc53H, unc53H3	http://www.genecards.org/cgi-bin/carddisp.pl?gene=NAV3
Ncam1	neural cell adhesion molecule 1	CD56, E-NC, E-NCAM, NC, NCAM-1, Ncam	http://www.genecards.org/cgi-bin/carddisp.pl?gene=NCAM1
Nceh1	neutral cholesterol ester hydrolase 1	Aad, Aadacl1, B230106I24Rik, CPO, CPO-BP, Nceh	http://www.genecards.org/cgi-bin/carddisp.pl?gene=NCEH1
Ncl	nucleolin	B530004O11Rik, C23, D0Nds28, D1Nds28, Nucl	http://www.genecards.org/cgi-bin/carddisp.pl?gene=NCL
Ndc80	NDC80 kinetochore complex component	2610020P18Rik, AV139730, HEC, HEC1, Kntc, Kntc2	http://www.genecards.org/cgi-bin/carddisp.pl?gene=NDC80
Ndufaf7	NADH:ubiquinone oxidoreductase complex assembly factor 7	2410091C18Rik, AL033374, PRO1853	http://www.genecards.org/cgi-bin/carddisp.pl?gene=NDUFAF7
Nebl	nebulette	1200007O21Rik, A630080F05Rik, BB140644, D830029A09Rik, Ln, Lnebl	http://www.genecards.org/cgi-bin/carddisp.pl?gene=NEBL
Nek10	NIMA (never in mitosis gene a)- related kinase 10	Gm282	http://www.genecards.org/cgi-bin/carddisp.pl?gene=NEK10
Nek2	NIMA (never in mitosis gene a)-related expressed kinase 2	AA617254, C77054	http://www.genecards.org/cgi-bin/carddisp.pl?gene=NEK2
Nek4	NIMA (never in mitosis gene a)-related expressed kinase 4	Stk2	http://www.genecards.org/cgi-bin/carddisp.pl?gene=NEK4
Nexn	nexilin	1110046H09Rik, AA553326, NELIN	http://www.genecards.org/cgi-bin/carddisp.pl?gene=NEXN
Nkiras2	NFKB inhibitor interacting Ras-like protein 2	2410003M04Rik, 4930527H08Rik, D630018G21Rik, KBR, KBRAS2	http://www.genecards.org/cgi-bin/carddisp.pl?gene=NKIRAS2
Nktr	natural killer tumor recognition sequence	5330401F18Rik, D9Wsu172, D9Wsu172e	http://www.genecards.org/cgi-bin/carddisp.pl?gene=NKTR
Nlgn1	neuroligin 1	6330415N05Rik, BB179718, N, NL1, Nl, Nlg1, mKIAA1070	http://www.genecards.org/cgi-bin/carddisp.pl?gene=NLGN1
Nlrc5	NLR family, CARD domain containing 5	AI4515, AI451557, AK220210, NOD27	http://www.genecards.org/cgi-bin/carddisp.pl?gene=NLRC5
Nlrp12	NLR family, pyrin domain containing 12	Na, Nalp12, PYPAF7, monarch-1	http://www.genecards.org/cgi-bin/carddisp.pl?gene=NLRP12
Nlrp1a	NLR family, pyrin domain containing 1A	CARD7, DEFCAP, Gm14, Gm15, N, NAC, Nalp1, Nalp1a, Nlrp1, PP1044
Nlrp1b	NLR family, pyrin domain containing 1B	Na, Nalp1b	http://www.genecards.org/cgi-bin/carddisp.pl?gene=NLRP1
Nme5	NME/NM23 family member 5	1700019D05Rik, Nm23-M, Nm23-M5	http://www.genecards.org/cgi-bin/carddisp.pl?gene=NME5
Nme8	NME/NM23 family member 8	1700056P15Rik, Sptr, Sptrx-2, Txndc, Txndc3	http://www.genecards.org/cgi-bin/carddisp.pl?gene=NME8
Nmnat1	nicotinamide nucleotide adenylyltransferase 1	2610529L11Rik, 5730441G13Rik, D4Cole, D4Cole1e, nm, nmnat	http://www.genecards.org/cgi-bin/carddisp.pl?gene=NMNAT1
Nmnat2	nicotinamide nucleotide adenylyltransferase 2	AI843915, D030041I09Rik, PN, PNAT1, PNAT2	http://www.genecards.org/cgi-bin/carddisp.pl?gene=NMNAT2
Nnt	nicotinamide nucleotide transhydrogenase	4930423F13Rik, AI323702, BB168308	http://www.genecards.org/cgi-bin/carddisp.pl?gene=NNT
Nod2	nucleotide-binding oligomerization domain containing 2	ACUG, BLAU, CD, Card, Card15, F830032C23Rik, IBD1, Nl, Nlrc2	http://www.genecards.org/cgi-bin/carddisp.pl?gene=NOD2
Notch1	notch 1	9930111A19Rik, Mi, Mis6, N, N1, Ta, Tan1, lin, lin-12	http://www.genecards.org/cgi-bin/carddisp.pl?gene=NOTCH1
Notch3	notch 3	AW229011, N, N3, hpb, hpbk	http://www.genecards.org/cgi-bin/carddisp.pl?gene=NOTCH3
Npc1l1	NPC1 like intracellular cholesterol transporter 1	9130221N23Rik, Gm243	http://www.genecards.org/cgi-bin/carddisp.pl?gene=NPC1L1
Npc2	NPC intracellular cholesterol transporter 2	2700012J19Rik, AA408070, AU045843, HE1	http://www.genecards.org/cgi-bin/carddisp.pl?gene=NPC2
Npl	N-acetylneuraminate pyruvate lyase	0610033B02Rik	http://www.genecards.org/cgi-bin/carddisp.pl?gene=NPL
Nptx2	neuronal pentraxin 2	Narp, n, np2	http://www.genecards.org/cgi-bin/carddisp.pl?gene=NPTX2
Nqo2	N-ribosyldihydronicotinamide quinone reductase 2	NMO2, Nm, Nmor2, Ox, Ox-, Ox2	http://www.genecards.org/cgi-bin/carddisp.pl?gene=NQO2
Nrbp1	nuclear receptor binding protein 1	B230344L17Rik, N, Nrbp	http://www.genecards.org/cgi-bin/carddisp.pl?gene=NRBP1
Nsmce2	NSE2/MMS21 homolog, SMC5-SMC6 complex SUMO ligase	1110014D18Rik, AI661537	http://www.genecards.org/cgi-bin/carddisp.pl?gene=NSMCE2
Nsrp1	nuclear speckle regulatory protein 1	8030451K07, AI851076, AL022898, Ccdc55, NS, NSpr70, NSrp70	http://www.genecards.org/cgi-bin/carddisp.pl?gene=NSRP1
Nt5c1a	5'-nucleotidase, cytosolic IA	Cn, Cn1a, Gm49	http://www.genecards.org/cgi-bin/carddisp.pl?gene=NT5C1A
Nudt4	nudix (nucleoside diphosphate linked moiety X)-type motif 4	4933436C10Rik, DI, DIP, DIPP-2, DIPP2, DIPP2alpha, DIPP2beta, HDCMB47, HDCMB47P	http://www.genecards.org/cgi-bin/carddisp.pl?gene=NUDT4
Nudt9	nudix (nucleoside diphosphate linked moiety X)-type motif 9	1190002C07Rik, ADPR-PPase, AI462474	http://www.genecards.org/cgi-bin/carddisp.pl?gene=NUDT9
Nxpe4	neurexophilin and PC-esterase domain family, member 4	C130036J11, D930028F11Rik, Fam55, Fam55d	http://www.genecards.org/cgi-bin/carddisp.pl?gene=NXPE4
Nynrin	NYN domain and retroviral integrase containing	AA409373, C80530, mKIAA1305	http://www.genecards.org/cgi-bin/carddisp.pl?gene=NYNRIN
Oacyl	O-acyltransferase like	5330437I02Rik, Acyl3
Odc1	ornithine decarboxylase, structural 1	OD, ODC	http://www.genecards.org/cgi-bin/carddisp.pl?gene=ODC1
Ogt	O-linked N-acetylglucosamine (GlcNAc) transferase (UDP-N-acetylglucosamine:polypeptide-N-acetylglucosaminyl transferase)	1110038P24Rik, 4831420N21Rik, AI115525, OG, Ogtl	http://www.genecards.org/cgi-bin/carddisp.pl?gene=OGT
Oit3	oncoprotein induced transcript 3	EF-9, LZP	http://www.genecards.org/cgi-bin/carddisp.pl?gene=OIT3
Oprd1	opioid receptor, delta 1	D, DOR, DOR-1, N, Nbor, mD, mDOR	http://www.genecards.org/cgi-bin/carddisp.pl?gene=OPRD1
Oprk1	opioid receptor, kappa 1	K-OR-1, KOR, KOR-1, MSL-1, Op, Oprk2, R2, R21	http://www.genecards.org/cgi-bin/carddisp.pl?gene=OPRK1
Osbp	oxysterol binding protein	1110018F06Rik, AW559088, mKIAA4220	http://www.genecards.org/cgi-bin/carddisp.pl?gene=OSBP
P4ha1	procollagen-proline, 2-oxoglutarate 4-dioxygenase (proline 4-hydroxylase), alpha 1 polypeptide	AL022634, P4, P4ha	http://www.genecards.org/cgi-bin/carddisp.pl?gene=P4HA1
P4ha2	procollagen-proline, 2-oxoglutarate 4-dioxygenase (proline 4-hydroxylase), alpha II polypeptide	AA407196, C76437, P4, P4hl	http://www.genecards.org/cgi-bin/carddisp.pl?gene=P4HA2
Pafah2	platelet-activating factor acetylhydrolase 2	2310074E22Rik, AI507170	http://www.genecards.org/cgi-bin/carddisp.pl?gene=PAFAH2
Paics	phosphoribosylaminoimidazole carboxylase, phosphoribosylaminoribosylaminoimidazole, succinocarboxamide synthetase	2610511I09Rik, A, ADE2H, ADE2H1, AIRC, PAIS	http://www.genecards.org/cgi-bin/carddisp.pl?gene=PAICS
Parp14	poly (ADP-ribose) polymerase family, member 14	1600029O10Rik, ARTD8, BC021340, Coa, CoaSt6, mKIAA1268	http://www.genecards.org/cgi-bin/carddisp.pl?gene=PARP14
Parp9	poly (ADP-ribose) polymerase family, member 9	ARTD9, AW214463, BC003281, Bagl, Bal, PARP-9	http://www.genecards.org/cgi-bin/carddisp.pl?gene=PARP9
Pbp2	phosphatidylethanolamine binding protein 2	1700023A18Rik, AI326308, Peb, Pebp, Pebp-2, Pebp2
Pcbd1	pterin 4 alpha carbinolamine dehydratase/dimerization cofactor of hepatocyte nuclear factor 1 alpha (TCF1) 1	Dco, Dcoh, Pcb, Pcbd, Pcd, Phs	http://www.genecards.org/cgi-bin/carddisp.pl?gene=PCBD1
Pcdh18	protocadherin 18	3110038E07Rik, BB095589, PCDH6, PCDH68L	http://www.genecards.org/cgi-bin/carddisp.pl?gene=PCDH18
Pclo	piccolo (presynaptic cytomatrix protein)	Ac, Acz, P, Pico	http://www.genecards.org/cgi-bin/carddisp.pl?gene=PCLO
Pcsk2	proprotein convertase subtilisin/kexin type 2	6330411F23Rik, AI839700, Nec, Nec-, Nec-2, Nec2, PC, PC2, Php, Phpp-2, SP, SPC2	http://www.genecards.org/cgi-bin/carddisp.pl?gene=PCSK2
Pcyt2	phosphate cytidylyltransferase 2, ethanolamine	1110033E03Rik, ET	http://www.genecards.org/cgi-bin/carddisp.pl?gene=PCYT2
Pdcd6	programmed cell death 6	AV299538, Al, Alg2, MA-, MA-3, P, PS2, alg, alg-2	http://www.genecards.org/cgi-bin/carddisp.pl?gene=PDCD6
Pde11a	phosphodiesterase 11A	6330414F14Rik, A630086N24Rik, Gm350, PDE11A1	http://www.genecards.org/cgi-bin/carddisp.pl?gene=PDE11A
Pfas	phosphoribosylformylglycinamidine synthase (FGAR amidotransferase)	4432409B16Rik, FGAMS, FGAR-AT, FGARAT, Gm18, PURL, S, Sofa	http://www.genecards.org/cgi-bin/carddisp.pl?gene=PFAS
Pgbd5	piggyBac transposable element derived 5	2900019M05Rik, AI854313	http://www.genecards.org/cgi-bin/carddisp.pl?gene=PGBD5
Pgm2	phosphoglucomutase 2	3230402E02Rik, Pgm, Pgm-, Pgm-1, Pgm1	http://www.genecards.org/cgi-bin/carddisp.pl?gene=PGM2
Phc2	polyhomeotic 2	A3galt2, AA415044, D130050K19Rik, D4Ertd810, D4Ertd810e, Edr, Edr2, Mph, Mph2, p36	http://www.genecards.org/cgi-bin/carddisp.pl?gene=PHC2
Phex	phosphate regulating endopeptidase homolog, X-linked	Gy, HPD, HPDR, HPDR1, Hyp, PEX	http://www.genecards.org/cgi-bin/carddisp.pl?gene=PHEX
Phkb	phosphorylase kinase beta	AI463271	http://www.genecards.org/cgi-bin/carddisp.pl?gene=PHKB
Pi16	peptidase inhibitor 16	1200009H11Rik, Cripi, PI-16	http://www.genecards.org/cgi-bin/carddisp.pl?gene=PI16
Pias1	protein inhibitor of activated STAT 1	2900068C24Rik, Ddxbp, Ddxbp1, GB, GBP	http://www.genecards.org/cgi-bin/carddisp.pl?gene=PIAS1
Pih1d2	PIH1 domain containing 2	2700059L22Rik	http://www.genecards.org/cgi-bin/carddisp.pl?gene=PIH1D2
Pikfyve	phosphoinositide kinase, FYVE type zinc finger containing	5230400C17Rik, P, Pip, Pip5k, Pip5k3, Pipk5k3, PipkIII, p235	http://www.genecards.org/cgi-bin/carddisp.pl?gene=PIKFYVE
Pink1	PTEN induced putative kinase 1	1190006F07Rik, AU042772, AW557854, BRPK, br, mFLJ00387	http://www.genecards.org/cgi-bin/carddisp.pl?gene=PINK1
Pipox	pipecolic acid oxidase	LPIPOX, Pso	http://www.genecards.org/cgi-bin/carddisp.pl?gene=PIPOX
Pir	pirin	2310042L19Rik, Pirnl	http://www.genecards.org/cgi-bin/carddisp.pl?gene=PIR
Pitx1	paired-like homeodomain transcription factor 1	Bft, P-O, P-OTX, Po, Potx, Ptx, Ptx1	http://www.genecards.org/cgi-bin/carddisp.pl?gene=PITX1
Pkhd1l1	polycystic kidney and hepatic disease 1-like 1	AB055648, PKHD, PKHDL1	http://www.genecards.org/cgi-bin/carddisp.pl?gene=PKHD1L1
Pla2g15	phospholipase A2, group XV	ACS, C87498, L, LLPL, Lpla2, Ly, Lypla3	http://www.genecards.org/cgi-bin/carddisp.pl?gene=PLA2G15
Pla2g1b	phospholipase A2, group IB, pancreas	P, Pla2a, sP, sPLA2IB	http://www.genecards.org/cgi-bin/carddisp.pl?gene=PLA2G1B
Pla2g2a	phospholipase A2, group IIA (platelets, synovial fluid)	EF, Mom1, Pla2, sPLA2, sPla2-IIA	http://www.genecards.org/cgi-bin/carddisp.pl?gene=PLA2G2A
Pla2g4a	phospholipase A2, group IVA (cytosolic, calcium-dependent)	Pla, Pla2g4, cP, cPL, cPLA2, cPLA2-alpha, cPLA2alpha	http://www.genecards.org/cgi-bin/carddisp.pl?gene=PLA2G4A
Pla2g7	phospholipase A2, group VII (platelet-activating factor acetylhydrolase, plasma)	PAF, PAF-AH, R75400	http://www.genecards.org/cgi-bin/carddisp.pl?gene=PLA2G7
Plac8	placenta-specific 8	C15, D5Wsu111, D5Wsu111e, o	http://www.genecards.org/cgi-bin/carddisp.pl?gene=PLAC8
Plcb1	phospholipase C, beta 1	3110043I21Rik, AI132408, Plcb, mKIAA0581	http://www.genecards.org/cgi-bin/carddisp.pl?gene=PLCB1
Plcb3	phospholipase C, beta 3	mKIAA4098	http://www.genecards.org/cgi-bin/carddisp.pl?gene=PLCB3
Pld2	phospholipase D2	PLD1C	http://www.genecards.org/cgi-bin/carddisp.pl?gene=PLD2
Plg	plasminogen	AI649309, P, Pg	http://www.genecards.org/cgi-bin/carddisp.pl?gene=PLG
Plk2	polo like kinase 2	S, Snk	http://www.genecards.org/cgi-bin/carddisp.pl?gene=PLK2
Plscr1	phospholipid scramblase 1	MmTR, MmTRA, MmTRA1a, MmTRA1b, MuPL, N, Nor1, TR, Tra1, Tra1a, Tra1b, Tras1, Tras2	http://www.genecards.org/cgi-bin/carddisp.pl?gene=PLSCR1
Plxna4	plexin A4	9330117B14, Pl, Plxa4, mKIAA1550	http://www.genecards.org/cgi-bin/carddisp.pl?gene=PLXNA4
Pmm2	phosphomannomutase 2	AI585868, C86848	http://www.genecards.org/cgi-bin/carddisp.pl?gene=PMM2
Pnck	pregnancy upregulated non-ubiquitously expressed CaM kinase	Bstk, Bstk3, CaMKIbe, CaMKIbeta2, CaMKlb2, Camk1, Camk1b, Pu, Punc, caMKlb1	http://www.genecards.org/cgi-bin/carddisp.pl?gene=PNCK
Pnliprp1	pancreatic lipase related protein 1	P, Plrp1	http://www.genecards.org/cgi-bin/carddisp.pl?gene=PNLIPRP1
Pnp	purine-nucleoside phosphorylase	AL024301, AU015798, Np, Np-1, Np-2, P, Pnp1	http://www.genecards.org/cgi-bin/carddisp.pl?gene=PNP
Pnpla2	patatin-like phospholipase domain containing 2	0610039C21Rik, 1110001C14Rik, At, Atgl, TTS-2.2, desn	http://www.genecards.org/cgi-bin/carddisp.pl?gene=PNPLA2
Poc1a	POC1 centriolar protein A	2510040D07Rik, Wdr5, Wdr51a, ch, cha	http://www.genecards.org/cgi-bin/carddisp.pl?gene=POC1A
Pol	pol protein
Polg	polymerase (DNA directed), gamma	AA409516, P, PolgA	http://www.genecards.org/cgi-bin/carddisp.pl?gene=POLG
Pp2d1	protein phosphatase 2C-like domain containing 1	4921523A10Rik	http://www.genecards.org/cgi-bin/carddisp.pl?gene=PP2D1
Ppm1a	protein phosphatase 1A, magnesium dependent, alpha isoform	2310003C21Rik, 2900017D14Rik, AI427932, AU017636, MMPa, MMPa-2, MPP, MPPa-1	http://www.genecards.org/cgi-bin/carddisp.pl?gene=PPM1A
Ppp1r32	protein phosphatase 1, regulatory subunit 32	4930579J09Rik, AU015816, II, IIIG9, IIIG9L, IIIG9S	http://www.genecards.org/cgi-bin/carddisp.pl?gene=PPP1R32
Ppp1r36	protein phosphatase 1, regulatory subunit 36	Gm70	http://www.genecards.org/cgi-bin/carddisp.pl?gene=PPP1R36
Ppp1r37	protein phosphatase 1, regulatory subunit 37	Gm158, Lrr, Lrrc68	http://www.genecards.org/cgi-bin/carddisp.pl?gene=PPP1R37
Ppp1r42	protein phosphatase 1, regulatory subunit 42	1700011J18Rik, 4930418G15Rik, Lrr, Lrrc67, TLRR	http://www.genecards.org/cgi-bin/carddisp.pl?gene=PPP1R42
Ppp3r1	protein phosphatase 3, regulatory subunit B, alpha isoform (calcineurin B, type I)	CaN, CaNB1, Cnb, Cnb1, MCIP1	http://www.genecards.org/cgi-bin/carddisp.pl?gene=PPP3R1
Ppp4c	protein phosphatase 4, catalytic subunit	1110002D08Rik, AU016079, P, PP-X, PP4C, Ppx, pp4	http://www.genecards.org/cgi-bin/carddisp.pl?gene=PPP4C
Ppt1	palmitoyl-protein thioesterase 1	9530043G02Rik, AA960502, C77813, CL, CLN1, D4Ertd184, D4Ertd184e, INCL, PPT	http://www.genecards.org/cgi-bin/carddisp.pl?gene=PPT1
Prdm13	PR domain containing 13		http://www.genecards.org/cgi-bin/carddisp.pl?gene=PRDM13
Prep	prolyl endopeptidase	AI047692, AI450383, D10Wsu136, D10Wsu136e, PE, PEP, Pop	http://www.genecards.org/cgi-bin/carddisp.pl?gene=PREP
Prkcg	protein kinase C, gamma	PKCga, PKCgamma, Pkc, Pkcc, Prk, Prkcc	http://www.genecards.org/cgi-bin/carddisp.pl?gene=PRKCG
Prss12	protease, serine 12 neurotrypsin (motopsin)	Bss, Bssp-3, mo, motopsin	http://www.genecards.org/cgi-bin/carddisp.pl?gene=PRSS12
Prss21	protease, serine 21	1700023E12Rik, TESP5, mT4, tes, testisin	http://www.genecards.org/cgi-bin/carddisp.pl?gene=PRSS21
Prss30	protease, serine 30	2010015P21Rik, D, Di, Disp, Disp1, Tmp, Tmprss8
Prss8	protease, serine 8 (prostasin)	2410039E18Rik, AI313909, C79772, CA, CAP1, f, fr, mCA, mCAP1	http://www.genecards.org/cgi-bin/carddisp.pl?gene=PRSS8
Prxl2b	peroxiredoxin like 2B	2810405K02Rik, AI836168, Fam213, Fam213b, PM/P, PM/PGFS	http://www.genecards.org/cgi-bin/carddisp.pl?gene=PRXL2B
Psap	prosaposin	AI037048, SGP, SGP-1	http://www.genecards.org/cgi-bin/carddisp.pl?gene=PSAP
Psat1	phosphoserine aminotransferase 1	D8Ertd814, D8Ertd814e, E, EPIP, PSA, Psat	http://www.genecards.org/cgi-bin/carddisp.pl?gene=PSAT1
Psmc4	proteasome (prosome, macropain) 26S subunit, ATPase, 4	CIP, CIP21, MIP2, MIP224	http://www.genecards.org/cgi-bin/carddisp.pl?gene=PSMC4
Psmd10	proteasome (prosome, macropain) 26S subunit, non-ATPase, 10	AW554874, gan	http://www.genecards.org/cgi-bin/carddisp.pl?gene=PSMD10
Ptdss1	phosphatidylserine synthase 1	AU044268, AW539008, PS, PSS-1, mKIAA0024	http://www.genecards.org/cgi-bin/carddisp.pl?gene=PTDSS1
Ptgr1	prostaglandin reductase 1	2510002C21Rik, DIG-1, Ltb4d, Ltb4dh, Zadh, Zadh3	http://www.genecards.org/cgi-bin/carddisp.pl?gene=PTGR1
Ptpra	protein tyrosine phosphatase, receptor type, A	P, PT, PTP, Ptpa, Ptpalpha, RP, Rptpalpha, Rptra, Rptralpha	http://www.genecards.org/cgi-bin/carddisp.pl?gene=PTPRA
Ptpre	protein tyrosine phosphatase, receptor type, E	PT, PTPe, PTPepsilon, RP, RPTPepsilon	http://www.genecards.org/cgi-bin/carddisp.pl?gene=PTPRE
Ptprj	protein tyrosine phosphatase, receptor type, J	AI450271, BET, By, Byp, CD148, DEP-, DEP-1, PTPbeta2, Ptpb2, R-PTP-J, R-PTP-eta, RP, RPTPJ, Scc, Scc-, Scc-1, Scc1	http://www.genecards.org/cgi-bin/carddisp.pl?gene=PTPRJ
Pzp	PZP, alpha-2-macroglobulin like	A1m, A2m, AI893533, MAM	http://www.genecards.org/cgi-bin/carddisp.pl?gene=PZP
R3hdm4	R3H domain containing 4	AI503502, C030046I01Rik	http://www.genecards.org/cgi-bin/carddisp.pl?gene=R3HDM4
Rab26	RAB26, member RAS oncogene family	A830020M03Rik	http://www.genecards.org/cgi-bin/carddisp.pl?gene=RAB26
Rab36	RAB36, member RAS oncogene family	6330593L16Rik, AW047545	http://www.genecards.org/cgi-bin/carddisp.pl?gene=RAB36
Rab3c	RAB3C, member RAS oncogene family	2700062I01Rik, 3110015B08Rik, 3110037E15Rik, AI850886	http://www.genecards.org/cgi-bin/carddisp.pl?gene=RAB3C
Rabepk	Rab9 effector protein with kelch motifs	8430412M01Rik, 9530020D24Rik, AV073337, C87311, Rab9p40	http://www.genecards.org/cgi-bin/carddisp.pl?gene=RABEPK
Ralgapb	Ral GTPase activating protein, beta subunit (non-catalytic)	AI507211, B230339M05Rik, p170	http://www.genecards.org/cgi-bin/carddisp.pl?gene=RALGAPB
Ranbp2	RAN binding protein 2	A430087B05Rik, AI256741, NUP358	http://www.genecards.org/cgi-bin/carddisp.pl?gene=RANBP2
Rasef	RAS and EF hand domain containing	BC030882, RAB, RAB45	http://www.genecards.org/cgi-bin/carddisp.pl?gene=RASEF
Rassf2	Ras association (RalGDS/AF-6) domain family member 2	3830431H01Rik, 9030412M04Rik, AI852669, AW495050	http://www.genecards.org/cgi-bin/carddisp.pl?gene=RASSF2
Rbbp9	retinoblastoma binding protein 9, serine hydrolase	Bo, Bog	http://www.genecards.org/cgi-bin/carddisp.pl?gene=RBBP9
Rcn2	reticulocalbin 2	AA408742, TCBP-4, Tcbp49	http://www.genecards.org/cgi-bin/carddisp.pl?gene=RCN2
Rdh11	retinol dehydrogenase 11	2610319N22Rik, AI428145, AU045252, Ar, Arsdr1, C85936, CGI-82, HCBP12, M42C60, Mdt1, Ps, Psdr1, SCALD, UBE-1c1, Ube-1c, ralR1	http://www.genecards.org/cgi-bin/carddisp.pl?gene=RDH11
Rdh12	retinol dehydrogenase 12		http://www.genecards.org/cgi-bin/carddisp.pl?gene=RDH12
Rdh13	retinol dehydrogenase 13 (all-trans and 9-cis)	8430425D21Rik	http://www.genecards.org/cgi-bin/carddisp.pl?gene=RDH13
Rdh14	retinol dehydrogenase 14 (all-trans and 9-cis)	3110030G19Rik, AW215439, P, PAN2	http://www.genecards.org/cgi-bin/carddisp.pl?gene=RDH14
Rdh7	retinol dehydrogenase 7	AI194929, CRA, CRAD2
Rfng	RFNG O-fucosylpeptide 3-beta-N-acetylglucosaminyltransferase		http://www.genecards.org/cgi-bin/carddisp.pl?gene=RFNG
Rfwd3	ring finger and WD repeat domain 3	BC027246	http://www.genecards.org/cgi-bin/carddisp.pl?gene=RFWD3
Rfx3	regulatory factor X, 3 (influences HLA class II expression)	C230093O12Rik, MRFX, MRFX3	http://www.genecards.org/cgi-bin/carddisp.pl?gene=RFX3
Rgs4	regulator of G-protein signaling 4	AA004315, AA597169, ESTM4, ESTM48, ESTM5, ESTM50	http://www.genecards.org/cgi-bin/carddisp.pl?gene=RGS4
Rheb	Ras homolog enriched in brain	Rheb1	http://www.genecards.org/cgi-bin/carddisp.pl?gene=RHEB
Rhoa	ras homolog family member A	A, Ar, Arha, Arha1, Arha2, R	http://www.genecards.org/cgi-bin/carddisp.pl?gene=RHOA
Rida	reactive intermediate imine deaminase A homolog	HR1, HR12, HRP, HRP12, Hrs, Hrsp12	http://www.genecards.org/cgi-bin/carddisp.pl?gene=RIDA
Ripk2	receptor (TNFRSF)-interacting serine-threonine kinase 2	2210420D18Rik, CAR, CARD3, CARDIAK, CCK, D4Bwg0615e, R, RI, RICK, RIP2	http://www.genecards.org/cgi-bin/carddisp.pl?gene=RIPK2
Rnf213	ring finger protein 213	6030403J01, D11Ertd759, D11Ertd759e, mysterin	http://www.genecards.org/cgi-bin/carddisp.pl?gene=RNF213
Ropn1l	ropporin 1-like	ASP, AV047578, Akapasp	http://www.genecards.org/cgi-bin/carddisp.pl?gene=ROPN1L
Rpusd4	RNA pseudouridylate synthase domain containing 4	2410001E19Rik	http://www.genecards.org/cgi-bin/carddisp.pl?gene=RPUSD4
Rs1	retinoschisis (X-linked, juvenile) 1 (human)	Rs, Rs1h, Xl, Xlrs1, tmgc1	http://www.genecards.org/cgi-bin/carddisp.pl?gene=RS1
Rsph10b	radial spoke head 10 homolog B (Chlamydomonas)	4930526H21Rik, Rsph1, Rsph10b2	http://www.genecards.org/cgi-bin/carddisp.pl?gene=RSPH10B
Rsph9	radial spoke head 9 homolog (Chlamydomonas)	1700027N10Rik	http://www.genecards.org/cgi-bin/carddisp.pl?gene=RSPH9
Rtca	RNA 3'-terminal phosphate cyclase	2310009A18Rik, AI450277, RPC, Rtcd, Rtcd1	http://www.genecards.org/cgi-bin/carddisp.pl?gene=RTCA
Rtl1	retrotransposon Gaglike 1	6430411K18Rik, M, Mar, Mart1, Mo, Mor1, Peg11	http://www.genecards.org/cgi-bin/carddisp.pl?gene=RTL1
Rufy3	RUN and FYVE domain containing 3	2810428M05Rik, 6330416M07Rik, AW455998, AW538594, D5Bwg0860e, R, Ripx, Rpipx	http://www.genecards.org/cgi-bin/carddisp.pl?gene=RUFY3
Rxfp1	relaxin/insulin-like family peptide receptor 1	Gm1018, Lg, Lgr7	http://www.genecards.org/cgi-bin/carddisp.pl?gene=RXFP1
Rxfp2	relaxin/insulin-like family peptide receptor 2	Gpr1, Gpr106, Gre, Great, LG, Lgr8	http://www.genecards.org/cgi-bin/carddisp.pl?gene=RXFP2
S1pr2	sphingosine-1-phosphate receptor 2	1100001A16Rik, Edg5, Gpcr, Gpcr13, H218, LP, LPb2, S1, S1P2	http://www.genecards.org/cgi-bin/carddisp.pl?gene=S1PR2
Samhd1	SAM domain and HD domain, 1	E330031J07Rik, Mg11, mSAMHD1	http://www.genecards.org/cgi-bin/carddisp.pl?gene=SAMHD1
Sat2	spermidine/spermine N1-acetyl transferase 2	2610016A03Rik, SS, SSA, SSAT-2, SSAT2	http://www.genecards.org/cgi-bin/carddisp.pl?gene=SAT2
Sc5d	sterol-C5-desaturase	A830037K02, A830073K23Rik, Sc5dl	http://www.genecards.org/cgi-bin/carddisp.pl?gene=SC5D
Scarb2	scavenger receptor class B, member 2	9330185J12Rik, Cd36l, Cd36l2, LGP, LGP85, LIM, LIMP II, LIMP-2, MLGP85	http://www.genecards.org/cgi-bin/carddisp.pl?gene=SCARB2
Scp2	sterol carrier protein 2, liver	AA409774, AA409893, C76618, C79031, NSL-TP, SC, SCP, SCP-2, SCP-X, SCPX, ns, ns-LTP	http://www.genecards.org/cgi-bin/carddisp.pl?gene=SCP2
Scpep1	serine carboxypeptidase 1	2410018F01Rik, 4833411K15Rik, AI957256, R, Risc	http://www.genecards.org/cgi-bin/carddisp.pl?gene=SCPEP1
Sdr16c5	short chain dehydrogenase/reductase family 16C, member 5	Rdhe, Rdhe2, Scd, Scdr9	http://www.genecards.org/cgi-bin/carddisp.pl?gene=SDR16C5
Secisbp2l	SECIS binding protein 2-like	3110001I20Rik, AI504340, C630011I23	http://www.genecards.org/cgi-bin/carddisp.pl?gene=SECISBP2L
Sele	selectin, endothelial cell	CD62E, E-sele, E-selectin, ELAM-1, El, Elam, LECAM2	http://www.genecards.org/cgi-bin/carddisp.pl?gene=SELE
Selenoi	selenoprotein I	4933402G07Rik, AI448296, AI452230, C79563, D5Wsu178, D5Wsu178e, Ept, Ept1, SELI, mKIAA1724	http://www.genecards.org/cgi-bin/carddisp.pl?gene=SELENOI
Selp	selectin, platelet	CD62, CD62P, GMP-140, Gr, Grmp, LECAM3, P-sel, PADGEM	http://www.genecards.org/cgi-bin/carddisp.pl?gene=SELP
Sema5b	sema domain, seven thrombospondin repeats (type 1 and type 1-like), transmembrane domain (TM) and short cytoplasmic domain, (semaphorin) 5B	AI893641, Sem, SemG, Semag, mKIAA1445	http://www.genecards.org/cgi-bin/carddisp.pl?gene=SEMA5B
Sema6d	sema domain, transmembrane domain (TM), and cytoplasmic domain, (semaphorin) 6D	1110067B02Rik, AA409156, D330011G23, mKIAA1479	http://www.genecards.org/cgi-bin/carddisp.pl?gene=SEMA6D
Serac1	serine active site containing 1	4930511N22Rik, D17Ertd141, D17Ertd141e	http://www.genecards.org/cgi-bin/carddisp.pl?gene=SERAC1
Sf3a2	splicing factor 3a, subunit 2	66kD, 66kDa, AW047242, PR, PRP11, SFA, SFA66, Sa, Sap62	http://www.genecards.org/cgi-bin/carddisp.pl?gene=SF3A2
Sfi1	Sfi1 homolog, spindle assembly associated (yeast)		http://www.genecards.org/cgi-bin/carddisp.pl?gene=SFI1
Sfrp2	secreted frizzled-related protein 2	AI851596, Sdf, Sdf5	http://www.genecards.org/cgi-bin/carddisp.pl?gene=SFRP2
Sh3rf3	SH3 domain containing ring finger 3	4831416G18Rik, Igfbp5-ip, Sh3md, Sh3md4, Sh3rf31	http://www.genecards.org/cgi-bin/carddisp.pl?gene=SH3RF3
Siae	sialic acid acetylesterase	L, LSE, Ysg, Ysg2	http://www.genecards.org/cgi-bin/carddisp.pl?gene=SIAE
Six6	sine oculis-related homeobox 6	Opt, Optx2, Si, Six9	http://www.genecards.org/cgi-bin/carddisp.pl?gene=SIX6
Slc10a1	solute carrier family 10 (sodium/bile acid cotransporter family), member 1	Nt, Ntcp	http://www.genecards.org/cgi-bin/carddisp.pl?gene=SLC10A1
Slc10a2	solute carrier family 10, member 2	9130221J18Rik, AI605518, AS, ASBT, IBAT, ISBT	http://www.genecards.org/cgi-bin/carddisp.pl?gene=SLC10A2
Slc13a2	solute carrier family 13 (sodium-dependent dicarboxylate transporter), member 2	Nad, Nadc-1, Nadc1, mNaDC, mNaDC-1	http://www.genecards.org/cgi-bin/carddisp.pl?gene=SLC13A2
Slc13a3	solute carrier family 13 (sodium-dependent dicarboxylate transporter), member 3	NaD, NaDC, NaDC-3, NaDC3, SDCT, SDCT2	http://www.genecards.org/cgi-bin/carddisp.pl?gene=SLC13A3
Slc16a12	solute carrier family 16 (monocarboxylic acid transporters), member 12	3230401A21, AW210596, MCT 12	http://www.genecards.org/cgi-bin/carddisp.pl?gene=SLC16A12
Slc16a14	solute carrier family 16 (monocarboxylic acid transporters), member 14	1110004H10Rik	http://www.genecards.org/cgi-bin/carddisp.pl?gene=SLC16A14
Slc16a9	solute carrier family 16 (monocarboxylic acid transporters), member 9	1200003C15Rik, 4930425B13Rik, AI552636	http://www.genecards.org/cgi-bin/carddisp.pl?gene=SLC16A9
Slc18a2	solute carrier family 18 (vesicular monoamine), member 2	1110037L13Rik, 9330105E13, Vma, Vmat2	http://www.genecards.org/cgi-bin/carddisp.pl?gene=SLC18A2
Slc18b1	solute carrier family 18, subfamily B, member 1	1110021L09Rik	http://www.genecards.org/cgi-bin/carddisp.pl?gene=SLC18B1
Slc1a1	solute carrier family 1 (neuronal/epithelial high affinity glutamate transporter, system Xag), member 1	D130048G10Rik, EAA, EAAC1, EAAC2, EAAT3, MEAA, MEAAC1	http://www.genecards.org/cgi-bin/carddisp.pl?gene=SLC1A1
Slc22a13	solute carrier family 22 (organic cation transporter), member 13	AI648912, OCT, OCTL1, OCTL3, ORC, ORCTL3	http://www.genecards.org/cgi-bin/carddisp.pl?gene=SLC22A13
Slc22a15	solute carrier family 22 (organic anion/cation transporter), member 15	2610034P21Rik, 4930477M19, A530052I06Rik, BB219042	http://www.genecards.org/cgi-bin/carddisp.pl?gene=SLC22A15
Slc22a21	solute carrier family 22 (organic cation transporter), member 21	Oct, Octn3, Slc2, Slc22a9
Slc22a3	solute carrier family 22 (organic cation transporter), member 3	EMT, Oct, Oct3, Orc, Orct3, Slca22a3	http://www.genecards.org/cgi-bin/carddisp.pl?gene=SLC22A3
Slc22a4	solute carrier family 22 (organic cation transporter), member 4	Oct, Octn1	http://www.genecards.org/cgi-bin/carddisp.pl?gene=SLC22A4
Slc22a5	solute carrier family 22 (organic cation transporter), member 5	L, Lstpl, Oct, Octn2, jvs	http://www.genecards.org/cgi-bin/carddisp.pl?gene=SLC22A5
Slc22a7	solute carrier family 22 (organic anion transporter), member 7	N, NLT, OA, OAT2	http://www.genecards.org/cgi-bin/carddisp.pl?gene=SLC22A7
Slc23a1	solute carrier family 23 (nucleobase transporters), member 1	D18Ucl, D18Ucla2, SVC, SVCT1, Slc2, Slc23a2, YS, YSPL3	http://www.genecards.org/cgi-bin/carddisp.pl?gene=SLC23A1
Slc25a12	solute carrier family 25 (mitochondrial carrier, Aralar), member 12	2610002D09Rik, AI839531, B230107K20Rik, BB129864	http://www.genecards.org/cgi-bin/carddisp.pl?gene=SLC25A12
Slc25a15	solute carrier family 25 (mitochondrial carrier ornithine transporter), member 15	D630044L02Rik, Or, Ornt1	http://www.genecards.org/cgi-bin/carddisp.pl?gene=SLC25A15
Slc25a3	solute carrier family 25 (mitochondrial carrier, phosphate carrier), member 3	5730556H19Rik, PTP, Ph, Phc	http://www.genecards.org/cgi-bin/carddisp.pl?gene=SLC25A3
Slc25a36	solute carrier family 25, member 36	C330005L02Rik	http://www.genecards.org/cgi-bin/carddisp.pl?gene=SLC25A36
Slc25a40	solute carrier family 25, member 40	B230315F11Rik	http://www.genecards.org/cgi-bin/carddisp.pl?gene=SLC25A40
Slc26a5	solute carrier family 26, member 5	P, Pres, pr, prestin	http://www.genecards.org/cgi-bin/carddisp.pl?gene=SLC26A5
Slc27a1	solute carrier family 27 (fatty acid transporter), member 1	FAT, FATP1, Fa, Fatp	http://www.genecards.org/cgi-bin/carddisp.pl?gene=SLC27A1
Slc2a1	solute carrier family 2 (facilitated glucose transporter), member 1	Glut, Glut-, Glut-1, Glut1, M100200, Rgsc2, Rgsc200	http://www.genecards.org/cgi-bin/carddisp.pl?gene=SLC2A1
Slc36a1	solute carrier family 36 (proton/amino acid symporter), member 1	5830411H19Rik, AI839897, Pa, Pat1	http://www.genecards.org/cgi-bin/carddisp.pl?gene=SLC36A1
Slc36a4	solute carrier family 36 (proton/amino acid symporter), member 4	6330573I15Rik, PA, PAT4	http://www.genecards.org/cgi-bin/carddisp.pl?gene=SLC36A4
Slc39a12	solute carrier family 39 (zinc transporter), member 12	AW046938, Gm731	http://www.genecards.org/cgi-bin/carddisp.pl?gene=SLC39A12
Slc5a11	solute carrier family 5 (sodium/glucose cotransporter), member 11	2010013B02Rik, Kst, Kst1, RKST2, SMIT2, Slc5a10	http://www.genecards.org/cgi-bin/carddisp.pl?gene=SLC5A11
Slc5a12	solute carrier family 5 (sodium/glucose cotransporter), member 12	AI315119, D630015G19, SMCT, SMCT2	http://www.genecards.org/cgi-bin/carddisp.pl?gene=SLC5A12
Slc5a8	solute carrier family 5 (iodide transporter), member 8	Ait, SMC, SMCT	http://www.genecards.org/cgi-bin/carddisp.pl?gene=SLC5A8
Slc6a11	solute carrier family 6 (neurotransmitter transporter, GABA), member 11	D930045G19Rik, E130202I16Rik, GAT, GAT4, Gabt, Gabt4, Gat3	http://www.genecards.org/cgi-bin/carddisp.pl?gene=SLC6A11
Slc6a13	solute carrier family 6 (neurotransmitter transporter, GABA), member 13	GAT3, Gabt, Gabt3, Gat, Gat2	http://www.genecards.org/cgi-bin/carddisp.pl?gene=SLC6A13
Slc6a3	solute carrier family 6 (neurotransmitter transporter, dopamine), member 3	DA, DAT, Dat1	http://www.genecards.org/cgi-bin/carddisp.pl?gene=SLC6A3
Slc6a5	solute carrier family 6 (neurotransmitter transporter, glycine), member 5	Glyt, Glyt2, prestin	http://www.genecards.org/cgi-bin/carddisp.pl?gene=SLC6A5
Slc7a9	solute carrier family 7 (cationic amino acid transporter, y+ system), member 9	CSN, CSNU3	http://www.genecards.org/cgi-bin/carddisp.pl?gene=SLC7A9
Slco1b2	solute carrier organic anion transporter family, member 1b2	7330442B20Rik, OATP-C, OATP2, Oatp, Oatp1b2, Oatp4, Slc2, Slc21, Slc21a10, Slc21a6, lst-1, mlst, mlst-1	http://www.genecards.org/cgi-bin/carddisp.pl?gene=SLCO1B3
Slco1c1	solute carrier organic anion transporter family, member 1c1	OAT, OATP-14, OATP-F, Oatp2, Oatpf, Slc21, Slc21a14	http://www.genecards.org/cgi-bin/carddisp.pl?gene=SLCO1C1
Slco4a1	solute carrier organic anion transporter family, member 4a1	OAT, OATP-E, Slc21, Slc21a12	http://www.genecards.org/cgi-bin/carddisp.pl?gene=SLCO4A1
Slit1	slit guidance ligand 1	S, Slil1, mKIAA0813	http://www.genecards.org/cgi-bin/carddisp.pl?gene=SLIT1
Smarcc2	SWI/SNF related, matrix associated, actin dependent regulator of chromatin, subfamily c, member 2	5930405J04Rik	http://www.genecards.org/cgi-bin/carddisp.pl?gene=SMARCC2
Smg1	SMG1 homolog, phosphatidylinositol 3-kinase-related kinase (C. elegans)	2610207I05Rik, 5430435M13Rik, C130002K18Rik, mKIAA0421	http://www.genecards.org/cgi-bin/carddisp.pl?gene=SMG1
Smok3a	sperm motility kinase 3A	Smok2b1
Smpd3	sphingomyelin phosphodiesterase 3, neutral	4631433G07Rik, AI427456, AW537966, f, fro, nSM, nSMase2	http://www.genecards.org/cgi-bin/carddisp.pl?gene=SMPD3
Smpd4	sphingomyelin phosphodiesterase 4	4122402O22Rik	http://www.genecards.org/cgi-bin/carddisp.pl?gene=SMPD4
Sms	spermine synthase	AI427066, Gy, SPMSY, Sp, SpmST, gyro	http://www.genecards.org/cgi-bin/carddisp.pl?gene=SMS
Smtn	smoothelin	smsmo	http://www.genecards.org/cgi-bin/carddisp.pl?gene=SMTN
Snai2	snail family zinc finger 2	S, Sl, Slu, Slug, Slugh, Snail2	http://www.genecards.org/cgi-bin/carddisp.pl?gene=SNAI2
Snrk	SNF related kinase	2010012F07Rik, AI448042, AW547029, E030034B15, R74830, S, mKIAA0096	http://www.genecards.org/cgi-bin/carddisp.pl?gene=SNRK
Snw1	SNW domain containing 1	2310008B08Rik, AW048543, NCoA, NCoA-62, S, SKIP, SN, Skiip	http://www.genecards.org/cgi-bin/carddisp.pl?gene=SNW1
Snx17	sorting nexin 17	5830447M19Rik, AI790646, D5Ertd260, D5Ertd260e, b2b1625.1Clo, mKIAA0064	http://www.genecards.org/cgi-bin/carddisp.pl?gene=SNX17
Snx29	sorting nexin 29	4933437K13Rik, Gm11170, Gm1737, Gm930, Rund, Rundc2a	http://www.genecards.org/cgi-bin/carddisp.pl?gene=SNX29
Socs6	suppressor of cytokine signaling 6	1500012M23Rik, 5830401B18Rik, AI447482, CI, Cis, Cis4, Cish4, HSPC0, HSPC060, S, SOC, SOCS-4, SOCS-6, SSI4, ST, STA, STAI4, STATI4, So, Socs4	http://www.genecards.org/cgi-bin/carddisp.pl?gene=SOCS6
Sorl1	sortilin-related receptor, LDLR class A repeats-containing	2900010L19Rik, AI596264, AW261561, LR, LR11, SorLA, gp250, m, mSorLA	http://www.genecards.org/cgi-bin/carddisp.pl?gene=SORL1
Sox4	SRY (sex determining region Y)-box 4	AA682046, Sox, Sox-4	http://www.genecards.org/cgi-bin/carddisp.pl?gene=SOX4
Spag6	sperm associated antigen 6	Sp, Spag6l	http://www.genecards.org/cgi-bin/carddisp.pl?gene=SPAG6
Spag9	sperm associated antigen 9	3110018C07Rik, 4733401I23Rik, 4831406C20Rik, AW552012, J, JI, JIP-4, JLP, JSAP2, JSAP2a, Jip4, Mapk, Mapk8ip4, syd, syd1	http://www.genecards.org/cgi-bin/carddisp.pl?gene=SPAG9
Spns2	spinster homolog 2		http://www.genecards.org/cgi-bin/carddisp.pl?gene=SPNS2
Spon1	spondin 1, (f-spondin) extracellular matrix protein	AI666765, AW455831, BC020531, D330035F22Rik, F, FSP	http://www.genecards.org/cgi-bin/carddisp.pl?gene=SPON1
Spout1	SPOUT domain containing methyltransferase 1	9930028P05, AL033358, CENP-32, D2Wsu81, D2Wsu81e	http://www.genecards.org/cgi-bin/carddisp.pl?gene=SPOUT1
Sppl2b	signal peptide peptidase like 2B	3110056O03Rik, AW550292, PSL1	http://www.genecards.org/cgi-bin/carddisp.pl?gene=SPPL2B
Spr	sepiapterin reductase	AA409688, Gm10328	http://www.genecards.org/cgi-bin/carddisp.pl?gene=SPR
Sptbn1	spectrin beta, non-erythrocytic 1	9930031C03Rik, AL033301, SPTB2, Sp, Spn, Spnb-2, Spnb2, elf, elf1, elf3, mKIAA4049	http://www.genecards.org/cgi-bin/carddisp.pl?gene=SPTBN1
Sptlc2	serine palmitoyltransferase, long chain base subunit 2	LCB, LCB2, LCB2a, Sp, Spt2	http://www.genecards.org/cgi-bin/carddisp.pl?gene=SPTLC2
Src	Rous sarcoma oncogene	AW259666, pp60c, pp60c-src	http://www.genecards.org/cgi-bin/carddisp.pl?gene=SRC
Ssna1	SS nuclear autoantigen 1	1110003H09Rik, 1190004J23Rik, AA934184, N1, N14, NA, NA14	http://www.genecards.org/cgi-bin/carddisp.pl?gene=SSNA1
Sspo	SCO-spondin	C79529, Sc, Scospondin	http://www.genecards.org/cgi-bin/carddisp.pl?gene=SSPOP
Sstr2	somatostatin receptor 2	SRIF-1, SS2R, SST, SSTR-2, Sms, Smst, Smstr-2, Smstr2, ss, sst2	http://www.genecards.org/cgi-bin/carddisp.pl?gene=SSTR2
Stab1	stabilin 1	FEEL-1, FELE-1, MFEEL-1, MS-, MS-1, STAB-1, mKIAA0246	http://www.genecards.org/cgi-bin/carddisp.pl?gene=STAB1
Stk11	serine/threonine kinase 11	AA408040, Lkb, Lkb1, Pa, Par-4, R75140	http://www.genecards.org/cgi-bin/carddisp.pl?gene=STK11
Stom	stomatin	Epb7., Epb7.2, sto	http://www.genecards.org/cgi-bin/carddisp.pl?gene=STOM
Ston2	stonin 2	4933401N24Rik, AI425999, AW544599	http://www.genecards.org/cgi-bin/carddisp.pl?gene=STON2
Stpg2	sperm tail PG rich repeat containing 2	B930007M17Rik, Gm1017	http://www.genecards.org/cgi-bin/carddisp.pl?gene=STPG2
Stpg3	sperm tail PG rich repeat containing 3	4933433C11Rik	http://www.genecards.org/cgi-bin/carddisp.pl?gene=STPG3
Sts	steroid sulfatase	A, ArsC	http://www.genecards.org/cgi-bin/carddisp.pl?gene=STS
Stum	mechanosensory transduction mediator	6330403A02Rik, Gm10001, R75555	http://www.genecards.org/cgi-bin/carddisp.pl?gene=STUM
Stx1b	syntaxin 1B	Stx1b2, Stx1bl, Syn1b	http://www.genecards.org/cgi-bin/carddisp.pl?gene=STX1B
Sult1b1	sulfotransferase family 1B, member 1	ST1B1, St2b2	http://www.genecards.org/cgi-bin/carddisp.pl?gene=SULT1B1
Sult1c1	sulfotransferase family, cytosolic, 1C, member 1	(PST, (PST)G, P-S, P-SULT, ST1C1, St, Stp2, Sult, Sult1a2, mOL, mOLFST	http://www.genecards.org/cgi-bin/carddisp.pl?gene=SULT1C3
Sult1c2	sulfotransferase family, cytosolic, 1C, member 2	1810008N17Rik, ST1C, ST1C1, ST1C2, Sult1c1	http://www.genecards.org/cgi-bin/carddisp.pl?gene=SULT1C2
Sult2a2	sulfotransferase family 2A, dehydroepiandrosterone (DHEA)-preferring, member 2	C730007P19Rik, ST, ST2A2, Sth, Sth2, mST, mSTa2	http://www.genecards.org/cgi-bin/carddisp.pl?gene=SULT2A1
Sult3a1	sulfotransferase family 3A, member 1	ST3A1, Sult, Sult-x2, Sultx2
Sult6b1	sulfotransferase family, cytosolic, 6B, member 1	2410078J06Rik, AV101767, ST6B1	http://www.genecards.org/cgi-bin/carddisp.pl?gene=SULT6B1
Suox	sulfite oxidase	SO	http://www.genecards.org/cgi-bin/carddisp.pl?gene=SUOX
Svep1	sushi, von Willebrand factor type A, EGF and pentraxin domain containing 1	1110021D17Rik, 4833413O10Rik, AA387071, D430029O09Rik, Pol, Polydom	http://www.genecards.org/cgi-bin/carddisp.pl?gene=SVEP1
Svop	SV2 related protein	1110030H18Rik, AI415691, m, msvop	http://www.genecards.org/cgi-bin/carddisp.pl?gene=SVOP
Synj2bp	synaptojanin 2 binding protein	A, AA409442, ARIP2, ActRIP4, D12Wsu118, D12Wsu118e, OMP, OMP25	http://www.genecards.org/cgi-bin/carddisp.pl?gene=SYNJ2BP
Syt16	synaptotagmin XVI	Stre, Strep14, Syt14l, syt1, syt14r	http://www.genecards.org/cgi-bin/carddisp.pl?gene=SYT16
Tafa5	TAFA chemokine like family member 5	Fam19, Fam19a5, Tafa-5, Tar, Tara-5	http://www.genecards.org/cgi-bin/carddisp.pl?gene=TAFA5
Tbata	thymus, brain and testes associated	1700021K02Rik, AI428928, S, Spatial, Titest	http://www.genecards.org/cgi-bin/carddisp.pl?gene=TBATA
Tbc1d20	TBC1 domain family, member 20	1110028I04Rik, 2810442O16Rik, AI414693, b, bs	http://www.genecards.org/cgi-bin/carddisp.pl?gene=TBC1D20
Tcp1	t-complex protein 1	AI528772, CCT, Cct1, Ccta, TR, TRic, Tcp-, Tcp-1, Tp6, Tp63, c-c, c-cpn, p6, p63	http://www.genecards.org/cgi-bin/carddisp.pl?gene=TCP1
Tdo2	tryptophan 2,3-dioxygenase	AA407491, T, TD, TDO, TO, chky	http://www.genecards.org/cgi-bin/carddisp.pl?gene=TDO2
Tecr	trans-2,3-enoyl-CoA reductase	2410016D23Rik, A230102P12Rik, AI173355, D17Ertd178, D17Ertd178e, Gp, Gpsn2, SC, SC2	http://www.genecards.org/cgi-bin/carddisp.pl?gene=TECR
Tecta	tectorin alpha	Tct, Tctna	http://www.genecards.org/cgi-bin/carddisp.pl?gene=TECTA
Tent2	terminal nucleotidyltransferase 2	8030446C20Rik, AI649009, GLD-2, Gld2, Pa, Papd4	http://www.genecards.org/cgi-bin/carddisp.pl?gene=TENT2
Tent5c	terminal nucleotidyltransferase 5C	4930431B09Rik, AI449797, Fam46, Fam46c	http://www.genecards.org/cgi-bin/carddisp.pl?gene=TENT5C
Tepp	testis, prostate and placenta expressed	1700055M20Rik	http://www.genecards.org/cgi-bin/carddisp.pl?gene=TEPP
Tex26	testis expressed 26	4930588N13Rik	http://www.genecards.org/cgi-bin/carddisp.pl?gene=TEX26
Tex43	testis expressed 43	1700065I17Rik, Tseg7	http://www.genecards.org/cgi-bin/carddisp.pl?gene=TEX43
Tfpi	tissue factor pathway inhibitor	A630013F22Rik, AW552122, EPI, LACI	http://www.genecards.org/cgi-bin/carddisp.pl?gene=TFPI
Tgm1	transglutaminase 1, K polypeptide	2310004J08Rik, TGas, Tgase1	http://www.genecards.org/cgi-bin/carddisp.pl?gene=TGM1
Th	tyrosine hydroxylase		http://www.genecards.org/cgi-bin/carddisp.pl?gene=TH
Thap1	THAP domain containing, apoptosis associated protein 1	4833431A01Rik, AW490810	http://www.genecards.org/cgi-bin/carddisp.pl?gene=THAP1
Thap11	THAP domain containing 11	2810036E22Rik, AB041579, CTG-B43a, CTG-B45d, Ronin	http://www.genecards.org/cgi-bin/carddisp.pl?gene=THAP11
Timeless	timeless circadian clock 1	C77407, Debt69, ti, tim	http://www.genecards.org/cgi-bin/carddisp.pl?gene=TIMELESS
Tkfc	triokinase, FMN cyclase	BC021917, Da, Dak	http://www.genecards.org/cgi-bin/carddisp.pl?gene=TKFC
Tm9sf2	transmembrane 9 superfamily member 2	1500001N15Rik, AA536814, D14Ertd64, D14Ertd64e, P7, P76	http://www.genecards.org/cgi-bin/carddisp.pl?gene=TM9SF2
Tm9sf4	transmembrane 9 superfamily member 4	AA986553, AU045326, B930079E06, mKIAA0255	http://www.genecards.org/cgi-bin/carddisp.pl?gene=TM9SF4
Tmed4	transmembrane p24 trafficking protein 4	1110014L17Rik, AI326346	http://www.genecards.org/cgi-bin/carddisp.pl?gene=TMED4
Tmem163	transmembrane protein 163	2610024A01Rik, A-c, A-cre, Act-C, Act-Cre, SV, SV31, Tg(ACTB-cre)2Mrt, actin, actin-cre, cre<ac, cre<actin>	http://www.genecards.org/cgi-bin/carddisp.pl?gene=TMEM163
Tmem168	transmembrane protein 168	5730526F17Rik, 8430437G11Rik, AI462344, AI504145	http://www.genecards.org/cgi-bin/carddisp.pl?gene=TMEM168
Tmem177	transmembrane protein 177	2300008B03Rik	http://www.genecards.org/cgi-bin/carddisp.pl?gene=TMEM177
Tmem189	transmembrane protein 189	AI840826, Kua, PEDS1	http://www.genecards.org/cgi-bin/carddisp.pl?gene=PEDS1
Tmem245	transmembrane protein 245	A630051L19Rik, AI957324, D730040F13Rik	http://www.genecards.org/cgi-bin/carddisp.pl?gene=TMEM245
Tmem45b	transmembrane protein 45b	BC018222	http://www.genecards.org/cgi-bin/carddisp.pl?gene=TMEM45B
Tmod3	tropomodulin 3	U-Tmo, U-Tmod, UTMO, UTMOD	http://www.genecards.org/cgi-bin/carddisp.pl?gene=TMOD3
Tmprss15	transmembrane protease, serine 15	Entk, P, Prss7	http://www.genecards.org/cgi-bin/carddisp.pl?gene=TMPRSS15
Tmprss6	transmembrane serine protease 6	1300008A22Rik	http://www.genecards.org/cgi-bin/carddisp.pl?gene=TMPRSS6
Tmprss7	transmembrane serine protease 7	B230219I23Rik, Gm1748	http://www.genecards.org/cgi-bin/carddisp.pl?gene=TMPRSS7
Tmprss9	transmembrane protease, serine 9	Seras, Serase-1B	http://www.genecards.org/cgi-bin/carddisp.pl?gene=TMPRSS9
Tnc	tenascin C	AI528729, C130033P17Rik, Hxb, T, TN, TN-, TN-C, Ten, cytota, cytotactin, tenas, tenascin-C	http://www.genecards.org/cgi-bin/carddisp.pl?gene=TNC
Tnnc2	troponin C2, fast	Tn, Tncs	http://www.genecards.org/cgi-bin/carddisp.pl?gene=TNNC2
Tnni1	troponin I, skeletal, slow 1	2700018B22Rik, AI747285, s, ssTnI	http://www.genecards.org/cgi-bin/carddisp.pl?gene=TNNI1
Tnr	tenascin R	J1-ten, J1-tenascin, TN, TN-R, ja, janusin, rest, restrictin	http://www.genecards.org/cgi-bin/carddisp.pl?gene=TNR
Tomm40	translocase of outer mitochondrial membrane 40	AW539759, Mom35, Tom4, Tom40	http://www.genecards.org/cgi-bin/carddisp.pl?gene=TOMM40
Tpi1	triosephosphate isomerase 1	AI255506, TIM, Tpi, Tpi-1	http://www.genecards.org/cgi-bin/carddisp.pl?gene=TPI1
Tpsab1	tryptase alpha/beta 1	MMCP-, MMCP-7, Mcp-, Mcp-7, Mcp7, Mcpt, Mcpt7	http://www.genecards.org/cgi-bin/carddisp.pl?gene=TPSAB1
Traf3	TNF receptor-associated factor 3	AI528849, CAP, CAP-1, CD40b, CD40bp, CRA, CRAF1, L, LAP1, T-BAM, TRAFAMN, amn	http://www.genecards.org/cgi-bin/carddisp.pl?gene=TRAF3
Tril	TLR4 interactor with leucine-rich repeats	1200009O22Rik, AI316813, mKIAA0644	http://www.genecards.org/cgi-bin/carddisp.pl?gene=TRIL
Trim2	tripartite motif-containing 2	mKIAA0517, n, narf	http://www.genecards.org/cgi-bin/carddisp.pl?gene=TRIM2
Trim3	tripartite motif-containing 3	BER, BERP1, HAC, HAC1, Rnf, Rnf22	http://www.genecards.org/cgi-bin/carddisp.pl?gene=TRIM3
Trim56	tripartite motif-containing 56	A130009K11Rik, Gm452, RNF1, RNF109	http://www.genecards.org/cgi-bin/carddisp.pl?gene=TRIM56
Trpa1	transient receptor potential cation channel, subfamily A, member 1	ANKT, Anktm1, TRPA1b	http://www.genecards.org/cgi-bin/carddisp.pl?gene=TRPA1
Tsg101	tumor susceptibility gene 101	AI255943, CC2	http://www.genecards.org/cgi-bin/carddisp.pl?gene=TSG101
Tshr	thyroid stimulating hormone receptor	AI481368, hypot, hypothroid, hyt, pe, pet	http://www.genecards.org/cgi-bin/carddisp.pl?gene=TSHR
Tsnaxip1	translin-associated factor X (Tsnax) interacting protein 1	1700016K08Rik, TXI, TXI1	http://www.genecards.org/cgi-bin/carddisp.pl?gene=TSNAXIP1
Tstd3	thiosulfate sulfurtransferase (rhodanese)-like domain containing 3	2610029I01Rik	http://www.genecards.org/cgi-bin/carddisp.pl?gene=TSTD3
Ttbk1	tau tubulin kinase 1	AU017937, AW048023, C330008L01Rik	http://www.genecards.org/cgi-bin/carddisp.pl?gene=TTBK1
Ttc28	tetratricopeptide repeat domain 28	2310015L07Rik, 6030435N04, AI428795, AI851761, BC002262, TPR, TPRBK	http://www.genecards.org/cgi-bin/carddisp.pl?gene=TTC28
Ttc39a	tetratricopeptide repeat domain 39A	4922503N01Rik	http://www.genecards.org/cgi-bin/carddisp.pl?gene=TTC39A
Ttc41	tetratricopeptide repeat domain 41	AI449705, AU041509, G, Gnn
Ttll11	tubulin tyrosine ligase-like family, member 11	4932702F08Rik, 4933424A20Rik, AU043211, D2Ertd624, D2Ertd624e	http://www.genecards.org/cgi-bin/carddisp.pl?gene=TTLL11
Ttll13	tubulin tyrosine ligase-like family, member 13	1700111A04Rik, 4921538O11, BC024578
Ttll4	tubulin tyrosine ligase-like family, member 4	4632407P03Rik, AI451681, mKIAA0173	http://www.genecards.org/cgi-bin/carddisp.pl?gene=TTLL4
Ttll9	tubulin tyrosine ligase-like family, member 9	1700016F23Rik, 4930509O20Rik, AW046572	http://www.genecards.org/cgi-bin/carddisp.pl?gene=TTLL9
Ttn	titin	1100001C23Rik, 2310036G12Rik, 2310057K23Rik, 2310074I15Rik, AF006999, AV006427, D330041I19Rik, D830007G01Rik, L5, L56, conn, mdm, sh, shru	http://www.genecards.org/cgi-bin/carddisp.pl?gene=TTN
Tub	tubby bipartite transcription factor	rd, rd5, tub	http://www.genecards.org/cgi-bin/carddisp.pl?gene=TUB
Tuba3a	tubulin, alpha 3A	AI528779, M[a], M[a]3, Tuba, Tuba3	http://www.genecards.org/cgi-bin/carddisp.pl?gene=TUBA3E
Tubb4b	tubulin, beta 4B class IVB	4930542G03Rik, Tubb2c, Tubb2c1	http://www.genecards.org/cgi-bin/carddisp.pl?gene=TUBB4B
Tubd1	tubulin, delta 1	4930550G19Rik, Tubd	http://www.genecards.org/cgi-bin/carddisp.pl?gene=TUBD1
Tut4	terminal uridylyl transferase 4	6030404K05Rik, 9230115F04Rik, PPAPD3, Tent, Tent3a, Zcchc11, mKIAA0191	http://www.genecards.org/cgi-bin/carddisp.pl?gene=TUT4
Txndc9	thioredoxin domain containing 9	AI098020, APACD, Ap	http://www.genecards.org/cgi-bin/carddisp.pl?gene=TXNDC9
Ubb	ubiquitin B	AL033289, Rps27a, Uba52, Ubb2, Ubc	http://www.genecards.org/cgi-bin/carddisp.pl?gene=UBB
Ube2d1	ubiquitin-conjugating enzyme E2D 1	UBCH5	http://www.genecards.org/cgi-bin/carddisp.pl?gene=UBE2D1
Ube2ql1	ubiquitin-conjugating enzyme E2Q family-like 1	3110006E14Rik	http://www.genecards.org/cgi-bin/carddisp.pl?gene=UBE2QL1
Ube2w	ubiquitin-conjugating enzyme E2W (putative)	6130401J04Rik	http://www.genecards.org/cgi-bin/carddisp.pl?gene=UBE2W
Ube3c	ubiquitin protein ligase E3C	AI853514, mKIAA0010	http://www.genecards.org/cgi-bin/carddisp.pl?gene=UBE3C
Ugp2	UDP-glucose pyrophosphorylase 2	UDPGP, UGPase	http://www.genecards.org/cgi-bin/carddisp.pl?gene=UGP2
Unc45a	unc-45 myosin chaperone A	AW538196	http://www.genecards.org/cgi-bin/carddisp.pl?gene=UNC45A
Unc45b	unc-45 myosin chaperone B	AA445617, Cmya, Cmya4, D230041A13Rik, UNC4, Unc45	http://www.genecards.org/cgi-bin/carddisp.pl?gene=UNC45B
Unc93a	unc-93 homolog A	Unc9, Unc93l, unc-93A	http://www.genecards.org/cgi-bin/carddisp.pl?gene=UNC93A
Ung	uracil DNA glycosylase	UNG1, UNG2	http://www.genecards.org/cgi-bin/carddisp.pl?gene=UNG
Upp2	uridine phosphorylase 2	1700124F02Rik, AI266885, UDRP, UDRPASE2, UP, UP2, UPA, UPASE2	http://www.genecards.org/cgi-bin/carddisp.pl?gene=UPP2
Ush2a	usherin	A930011D15Rik, A930037M10Rik, Gm676, Gm983, MUSH, Mush2a, Us, Ush, Ushrn	http://www.genecards.org/cgi-bin/carddisp.pl?gene=USH2A
Utp15	UTP15 small subunit processome component	AW544865	http://www.genecards.org/cgi-bin/carddisp.pl?gene=UTP15
Vamp2	vesicle-associated membrane protein 2	Syb, Syb-, Syb-2, Syb2, Vamp-2, sy, sybII	http://www.genecards.org/cgi-bin/carddisp.pl?gene=VAMP2
Vamp3	vesicle-associated membrane protein 3	D130027G05Rik, VAM, VAMP-3, ceb, cellu	http://www.genecards.org/cgi-bin/carddisp.pl?gene=VAMP3
Vapa	vesicle-associated membrane protein, associated protein A	33kDa, VA, VAMP-A, VAP-33, VAP-A, VAP33	http://www.genecards.org/cgi-bin/carddisp.pl?gene=VAPA
Vash1	vasohibin 1	AI834978, D930046M13Rik, G630009D10Rik, TTCP 1	http://www.genecards.org/cgi-bin/carddisp.pl?gene=VASH1
Vim	vimentin		http://www.genecards.org/cgi-bin/carddisp.pl?gene=VIM
Vit	vitrin	1700052E02Rik, 1700110E08Rik, 2810429K11Rik, AKH, ak, akhirin	http://www.genecards.org/cgi-bin/carddisp.pl?gene=VIT
Vps11	VPS11, CORVET/HOPS core subunit	1200011A11Rik	http://www.genecards.org/cgi-bin/carddisp.pl?gene=VPS11
Vps13a	vacuolar protein sorting 13A	4930425F11, 4930516E05Rik, 4930543C13Rik, 9930023P20, Chac, Chorein, D330038K10Rik, mKIAA0986	http://www.genecards.org/cgi-bin/carddisp.pl?gene=VPS13A
Vps35	VPS35 retromer complex component	AI647796, Mem3	http://www.genecards.org/cgi-bin/carddisp.pl?gene=VPS35
Vta1	vesicle (multivesicular body) trafficking 1	1110001D18Rik, 1110059P08Rik, AU040813, C85340, LIP5, SBP1	http://www.genecards.org/cgi-bin/carddisp.pl?gene=VTA1
Vwa3a	von Willebrand factor A domain containing 3A	E030013G06Rik	http://www.genecards.org/cgi-bin/carddisp.pl?gene=VWA3A
Vwa8	von Willebrand factor A domain containing 8	1300010F03Rik, 4932416F07Rik, AI957255, Kiaa0564, mKIAA0564	http://www.genecards.org/cgi-bin/carddisp.pl?gene=VWA8
Wdr35	WD repeat domain 35	4930459M12Rik, 4931430C06, mKIAA1336	http://www.genecards.org/cgi-bin/carddisp.pl?gene=WDR35
Wdr70	WD repeat domain 70	4833422F06Rik	http://www.genecards.org/cgi-bin/carddisp.pl?gene=WDR70
Wdr93	WD repeat domain 93	EG626359	http://www.genecards.org/cgi-bin/carddisp.pl?gene=WDR93
Wfs1	wolframin ER transmembrane glycoprotein	AI481085, wol, wolframin	http://www.genecards.org/cgi-bin/carddisp.pl?gene=WFS1
Wscd1	WSC domain containing 1	mKIAA0523	http://www.genecards.org/cgi-bin/carddisp.pl?gene=WSCD1
Wt1	Wilms tumor 1 homolog	D630046I19Rik, Wt-1	http://www.genecards.org/cgi-bin/carddisp.pl?gene=WT1
Wwp1	WW domain containing E3 ubiquitin protein ligase 1	8030445B08Rik, A, AIP5, SD, SDRP1, Tiu, Tiul1	http://www.genecards.org/cgi-bin/carddisp.pl?gene=WWP1
Wwp2	WW domain containing E3 ubiquitin protein ligase 2	1300010O06Rik, A, AA690238, AIP2, AW554328	http://www.genecards.org/cgi-bin/carddisp.pl?gene=WWP2
Xiap	X-linked inhibitor of apoptosis	1110015C02Rik, A, Aipa, Api3, Bir, Birc4, I, IAP3, IL, ILP-1, MIHA	http://www.genecards.org/cgi-bin/carddisp.pl?gene=XIAP
Xkr6	X-linked Kx blood group related 6	2700008G24Rik, BC024502, Xrg6	http://www.genecards.org/cgi-bin/carddisp.pl?gene=XKR6
Xpo1	exportin 1	AA420417, Crm, Crm1, Exp1	http://www.genecards.org/cgi-bin/carddisp.pl?gene=XPO1
Yes1	YES proto-oncogene 1, Src family tyrosine kinase	Ye, Yes, p61-Yes	http://www.genecards.org/cgi-bin/carddisp.pl?gene=YES1
Yipf3	Yip1 domain family, member 3	C6orf109, D17Wsu94, D17Wsu94e, KLIP1	http://www.genecards.org/cgi-bin/carddisp.pl?gene=YIPF3
Ykt6	YKT6 v-SNARE homolog (S. cerevisiae)	0610042I15Rik, 1810013M05Rik, AW105923	http://www.genecards.org/cgi-bin/carddisp.pl?gene=YKT6
Ypel2	yippee like 2	6430570G24, E130113K08Rik	http://www.genecards.org/cgi-bin/carddisp.pl?gene=YPEL2
Zan	zonadhesin	Z, Zan-test	http://www.genecards.org/cgi-bin/carddisp.pl?gene=ZAN
Zar1	zygote arrest 1		http://www.genecards.org/cgi-bin/carddisp.pl?gene=ZAR1
Zbed4	zinc finger, BED type containing 4	1700009F06Rik	http://www.genecards.org/cgi-bin/carddisp.pl?gene=ZBED4
Zbtb49	zinc finger and BTB domain containing 49	4930518A03Rik, Zfp50, Zfp509, Znf509	http://www.genecards.org/cgi-bin/carddisp.pl?gene=ZBTB49
Zfp2	zinc finger protein 2	9930007F06Rik, Fnp, Fnp-2, Zfp-, Zfp-2, mKR2, mkr-, mkr-2, mszf87	http://www.genecards.org/cgi-bin/carddisp.pl?gene=ZFP2
Zfp26	zinc finger protein 26	5033428C05Rik, KRAB, KRAB15, Zfp-2, Zfp-26, Zfp7, Zfp70, Zfp81-, Zfp81-rs1, mKIAA4196, mkr-, mkr-3, mszf14, mszf52	http://www.genecards.org/cgi-bin/carddisp.pl?gene=ZNF778
Zfp37	zinc finger protein 37	Tz, Tzn, Zfp-3, Zfp-37	http://www.genecards.org/cgi-bin/carddisp.pl?gene=ZFP37
Zfp62	zinc finger protein 62		http://www.genecards.org/cgi-bin/carddisp.pl?gene=ZFP62
Zfp69	zinc finger protein 69	Gm1029, KRA, Krab2, Zfp6, Zfp63	http://www.genecards.org/cgi-bin/carddisp.pl?gene=ZFP69
Zmynd19	zinc finger, MYND domain containing 19	2700064H14Rik, AA536891, AU014915, mizip	http://www.genecards.org/cgi-bin/carddisp.pl?gene=ZMYND19
Zscan10	zinc finger and SCAN domain containing 10	BC068284, Zfp20, Zfp206, Zkscan10, Znf206, Zsca	http://www.genecards.org/cgi-bin/carddisp.pl?gene=ZSCAN10
Zyg11b	zyg-ll family member B, cell cycle regulator	1110046I03Rik, 2810482G21Rik, D4Mgi2, D4Mgi23, Gm431, mKIAA1730	http://www.genecards.org/cgi-bin/carddisp.pl?gene=ZYG11B
Zzz3	zinc finger, ZZ domain containing 3	3110065C23Rik, 6430567E01Rik, AA408566, AI481057, AW556059, R75514	http://www.genecards.org/cgi-bin/carddisp.pl?gene=ZZZ3

## Sheet: Late_Enriched pathways
GeneAnalytics - Pathway results			Prepared for: Tal Gordon (talgordon@mail.tau.ac.il)
			Date: 7/22/2021
Copyright © LifeMap Sciences, Inc.
Statistics:
# Identified genes	867
# Matched genes	417
# Matched entities	46
Matching score statistics:
# High score matches	15
# Med score matches	31
# Low score matches	0
Results
Score	SuperPath Name	# SuperPath Total Genes	# SuperPath Matched Genes	Matched Genes (Symbols)	Evidence URL
79.4095	Metabolism	2628	209	SMS, CLPS, ACHE, ACSF2, AASS, ABCG1, IQGAP1, ADA, AFMID, ABAT, ABCC5, VAPA, AGMAT, ALDH5A1, ADSL, ABCB1, ABCC3, PSMD10, HAO1, ABHD14B, ACO1, CYP3A7, FAAH, ACAT1, SLC10A1, HS3ST2, SLC23A1, ABHD4, SLC2A1, NUDT4, DHTKD1, C1GALT1, DCXR, AK7, AK8, SPR, SPTLC2, HS3ST5, AGRN, RDH12, ALDH2, SLC5A8, CERS2, AK2, NMNAT2, ACY1, AK1, CYP26B1, PLA2G4A, PLCB1, SULT1B1, UPP2, LRP2, CH25H, MGAT5, PMM2, ECI1, NUDT…	http://pathcards.genecards.org/card/metabolism
23.3144	Biosynthesis of Cofactors	157	23	AFMID, ADSL, AK7, AK8, SPR, RDH12, ALDH2, AK2, NMNAT2, AK1, PMM2, ALPL, AKR1A1, SDR16C5, TDO2, COASY, RDH13, PSAT1, NADSYN1, RDH11, UGP2, NMNAT1, MTHFD2	http://pathcards.genecards.org/card/biosynthesis_of_cofactors
22.4956	Cytochrome P450 - Arranged By Substrate Type	302	33	ABHD14B, CYP3A7, HS3ST2, ALDH2, ACY1, CYP26B1, SULT1B1, SULT1C3, AKR1A1, GAL3ST3, CYP2R1, KCNAB2, GSTT2, SULT1C2, CYP1B1, CYP2J2, BAAT, GSTP1, SULT6B1, CHST14, GSTM1, UGP2, CHST9, HS3ST3B1, HS6ST1, GGT1, CYP1A1, CHST1, SULT2A1, GAL3ST1, GSTM3, NQO2, CYP2U1	http://pathcards.genecards.org/card/cytochrome_p450_-_arranged_by_substrate_type
21.2183	NRF2 Pathway	145	21	ABCC5, ABCC3, SLC2A1, SLC5A8, SLC6A3, SLC6A11, SLC5A12, GSTT2, BLVRB, PTGR1, SLC39A12, GSTP1, SLC5A11, KEAP1, GSTM1, GGT1, FTH1, SLC6A13, SLC6A5, G6PD, GSTM3	http://pathcards.genecards.org/card/nrf2_pathway
17.0448	Glycosaminoglycan Metabolism	296	29	ABCC5, HS3ST2, SLC2A1, DCXR, HS3ST5, AGRN, AKR1A1, AMY2A, HPSE, B4GALT1, TPI1, PGM2, SLC25A12, UBB, B4GALT2, GOT1, MDH1, RANBP2, GNPDA1, PHKB, CHST14, TKFC, UGP2, CHST9, HS3ST3B1, HS6ST1, CHST1, B4GAT1, G6PD	http://pathcards.genecards.org/card/glycosaminoglycan_metabolism
16.7781	NAD Metabolism	74	13	AFMID, SLC5A8, NMNAT2, ALPL, NT5C1A, TDO2, PARP14, NADSYN1, SLC22A13, NNT, PNP, NMNAT1, PARP9	http://pathcards.genecards.org/card/nad_metabolism
16.1782	Synthesis of Bile Acids and Bile Salts	45	10	ABCC3, SLC10A1, CH25H, SLCO1B3, SCP2, OSBP, SLC10A2, HSD3B7, BAAT, FABP6	http://pathcards.genecards.org/card/synthesis_of_bile_acids_and_bile_salts
15.9684	Apoptosis and Survival Caspase Cascade	90	14	CASP8, ACTG1, RIPK2, HSPB1, GSN, XIAP, CASP2, BIRC2, CASP9, VIM, BIRC3, CASP7, LMNA, MADD	http://pathcards.genecards.org/card/apoptosis_and_survival_caspase_cascade
15.2075	TNFR1 Pathway	237	24	CASP8, ACTA2, DAPK1, ACTG1, RIPK2, GSN, SPTBN1, CREBBP, SELE, TRAF3, XIAP, CASP2, BIRC2, CASP9, DAPK3, PTPRA, BIRC3, CASP7, ERAP1, SMPD3, LMNA, MAP3K2, MAP3K3, MADD	http://pathcards.genecards.org/card/tnfr1_pathway
14.4994	Tryptophan Utilization	32	8	AFMID, ALDH2, AKR1A1, TDO2, NADSYN1, CYP1B1, NMNAT1, CYP2U1	http://pathcards.genecards.org/card/superpathway_of_tryptophan_utilization
14.0628	Metabolism of Nucleotides	172	19	ADA, ADSL, AK7, AK8, AK2, AK1, UPP2, NUDT9, NT5C1A, GUK1, PGM2, PAICS, PFAS, PDE11A, DCTD, GUCY1B1, CANT1, PNP, RDH14	http://pathcards.genecards.org/card/metabolism_of_nucleotides
13.7413	Metabolism of Water-soluble Vitamins and Cofactors	175	19	CLPS, SLC23A1, SLC2A1, AGRN, SLC5A8, NMNAT2, LRP2, ALDH1L2, CYP2R1, COASY, PARP14, NADSYN1, SLC22A13, RDH11, LRP1, NMNAT1, MTHFD2, MOCS3, PARP9	http://pathcards.genecards.org/card/metabolism_of_water-soluble_vitamins_and_cofactors
13.636	Drug Metabolism - Cytochrome P450	176	19	CYP3A7, RDH12, ALDH2, CYP26B1, UPP2, ALDH3B2, DHRS4, ALDH1A2, SDR16C5, RDH13, GSTT2, CYP1B1, GSTP1, RDH11, GSTM1, RDH14, CYP1A1, SULT2A1, GSTM3	http://pathcards.genecards.org/card/drug_metabolism_-_cytochrome_p450
13.6099	Purine Nucleotides De Novo Biosynthesis	45	9	ADA, AK7, AK8, AK2, AK1, NME5, GUK1, PAICS, PNP	http://pathcards.genecards.org/card/purine_nucleotides_de_novo_biosynthesis
13.542	Sulfation Biotransformation Reaction	18	6	SULT1B1, SULT1C3, SULT1C2, SULT6B1, SULT2A1, G6PD	http://pathcards.genecards.org/card/sulfation_biotransformation_reaction
13.1077	Glutathione Metabolism	70	11	SMS, GSTT4, AKR1A1, GPX6, GSTT2, GSTP1, GSTM1, GGT1, ODC1, G6PD, GSTM3	http://pathcards.genecards.org/card/glutathione_metabolism
12.932	Blood-Brain Barrier and Immune Cell Transmigration: Pathways Overview	71	11	ABCC5, ABCB1, ABCC3, SLC2A1, AGRN, SLCO1C1, ITGAM, ITGB1, CLDN19, FN1, LRP1	http://pathcards.genecards.org/card/blood-brain_barrier_and_immune_cell_transmigration_pathways_overview
12.9178	Amb2 Integrin Signaling	48	9	YES1, ITGAM, SRC, SELP, FN1, LRP1, PLG, RHOA, FYN	http://pathcards.genecards.org/card/amb2_integrin_signaling
12.8048	Mitochondrial LC-Fatty Acid Beta-Oxidation	38	8	ACSF2, ACAT1, ECI1, SCP2, TPI1, PNPLA2, EHHADH, CPT1A	http://pathcards.genecards.org/card/mitochondrial_lc-fatty_acid_beta-oxidation
12.7076	Ubiquitin Mediated Proteolysis	140	16	WWP1, PIAS1, UBE2W, KLHL9, XIAP, UBE2QL1, UBB, UBE2D1, BIRC2, UBE3C, BIRC3, KEAP1, HERC4, WWP2, FZR1, FBXW7	http://pathcards.genecards.org/card/ubiquitin_mediated_proteolysis
12.5936	Glucose Metabolism	141	16	ACAT1, SLC2A1, ALDH2, ALDH3B2, AKR1A1, TPI1, PGM2, SLC25A12, UBB, GOT1, MDH1, GNPDA1, PHKB, MPC2, GALM, UGP2	http://pathcards.genecards.org/card/glucose_metabolism
12.575	Arachidonic Acid Metabolism	61	10	FAAH, PLA2G4A, ALOX5, PTGR1, CYP1B1, CYP2J2, GGT1, CYP1A1, PRXL2B, CYP2U1	http://pathcards.genecards.org/card/arachidonic_acid_metabolism
12.3894	Tryptophan Metabolism	62	10	AFMID, ACAT1, DHTKD1, ALDH2, ALDH1A2, TDO2, CYP1B1, CYP2J2, EHHADH, CYP1A1	http://pathcards.genecards.org/card/tryptophan_metabolism
12.2361	Neuroscience	341	28	PCSK2, AGTPBP1, CNTNAP1, CNTNAP2, ITGAM, NOTCH1, RGS4, TH, SLC1A1, SLC25A12, HCN2, UBB, PINK1, SORL1, PLXNA4, CAPN1, GSTP1, WFS1, HTT, NCAM1, LRP1, NOTCH3, TNC, VAMP2, VAMP3, GRIA4, GLUD1, GNAZ	http://pathcards.genecards.org/card/neuroscience
12.1642	DREAM Repression and Dynorphin Expression	223	21	CASP8, ACTA2, ACTG1, RIPK2, CREBBP, ITGAM, OPRK1, ITGB1, CASP2, BIRC2, SRC, CAPN1, CASP9, GATA2, BIRC3, CASP7, CAPN9, CHRNA1, SMPD3, CDK2, LMNA	http://pathcards.genecards.org/card/dream_repression_and_dynorphin_expression
12.072	Nucleotide-binding Oligomerization Domain (NOD) Pathway	41	8	CASP8, NLRP12, RIPK2, NLRP1, XIAP, CASP9, NOD2, CASP7	http://pathcards.genecards.org/card/nucleotide-binding_oligomerization_domain_(nod)_pathway
12.072	Striated Muscle Contraction	41	8	ACTA2, ACTG1, TNNC2, MYH6, TNNI1, TTN, VIM, TMOD3	http://pathcards.genecards.org/card/striated_muscle_contraction
12.0355	Syndecan-4-mediated Signaling Events	31	7	TFPI, FGF6, ITGB1, FN1, PLG, TNC, RHOA	http://pathcards.genecards.org/card/syndecan-4-mediated_signaling_events
11.6571	Innate Immune System	2124	113	CASP8, PTPRJ, IQGAP1, VAPA, PSMD10, WWP1, FGF6, MASP2, COLEC10, COLEC11, HECTD1, ACTG1, KPNA2, YES1, ADAR, KLHL11, ITLN1, RIPK2, PIAS1, AKAP9, UBE2W, CARD11, NLRP1, GSN, SPTBN1, CFB, STOM, KLHL2, TUBB4B, CREBBP, ITGAM, CYBB, ALOX5, KLHL41, OPRD1, KCNAB2, PLA2G2A, KLHL20, KLHL9, TRAF3, ARF1, HPSE, PRKCG, TRIM3, ITGB1, B4GALT1, TRIM56, KLHL3, PGM2, COTL1, CASP2, UBB, PLAC8, UBE2D1, BIRC2, CTSS, SRC…	http://pathcards.genecards.org/card/innate_immune_system
11.6182	Signaling By Retinoic Acid	43	8	CYP26B1, DHRS4, ALDH1A2, SDR16C5, RDH13, RDH11, RDH14, CPT1A	http://pathcards.genecards.org/card/signaling_by_retinoic_acid
11.395	Sphingolipid Metabolism	94	12	VAPA, SPTLC2, CERS2, ALDH3B2, OSBP, ARSA, SMPD4, PSAP, SMPD3, STS, GAL3ST1, CPTP	http://pathcards.genecards.org/card/sphingolipid_metabolism
11.369	Metabolism of Proteins	1624	90	ACHE, PCSK2, NSMCE2, EXOC1, MSRA, PSMD10, ACE, F5, SSPOP, C1GALT1, ANK1, ACTR8, KIF13A, TECTA, RIPK2, PIAS1, UBE2W, CPN1, GSN, ADAMTS18, SPON1, SPTBN1, TBC1D20, MGAT5, ADORA2B, PMM2, TUBB4B, ALPL, ALG6, ANK2, GOSR2, TRAF3, ARF1, IGFALS, YKT6, SEMA5B, BCHE, ERN1, B4GALT1, MFGE8, RAB26, EEF2KMT, SLC25A12, TUBA3E, RAB3C, UBB, B4GALT2, UBE2D1, CXXC1, BIRC2, PRSS21, SORL1, KLK1, OGT, RANBP2, GP2, TCP1…	http://pathcards.genecards.org/card/metabolism_of_proteins
11.1534	Thiamine Metabolism	16	5	AK7, AK8, AK2, AK1, ALPL	http://pathcards.genecards.org/card/thiamine_metabolism
10.9992	CFTR-dependent Regulation of Ion Channels in Airway Epithelium (norm and CF)	35	7	YES1, PLCB1, UBB, PLCB3, PRSS8, KCNQ1, WWP2	http://pathcards.genecards.org/card/cftr-dependent_regulation_of_ion_channels_in_airway_epithelium_(norm_and_cf)
10.9726	Glucose / Energy Metabolism	307	25	ABCB1, ABCC3, ACO1, FAAH, ACAT1, SLC2A1, KLF5, STK11, C1QBP, SLC25A12, PLA2G1B, PLAC8, FABP3, GATA2, PNPLA2, OGT, WFS1, MPC2, NPC1L1, FTH1, G6PD, NMNAT1, GLUD1, CPT1A, MTHFD2	http://pathcards.genecards.org/card/glucose__energy_metabolism
10.8548	Asparagine Degradation	4	3	ASRGL1, ASPG, GOT1	http://pathcards.genecards.org/card/asparagine_degradation
10.7614	Drug Induction of Bile Acid Pathway	17	5	ABCB1, ABCC3, SLC10A1, BAAT, SULT2A1	http://pathcards.genecards.org/card/drug_induction_of_bile_acid_pathway
10.5881	Nucleotide-binding Domain, Leucine Rich Repeat Containing Receptor (NLR) Signaling Pathways	48	8	CASP8, RIPK2, NLRP1, CASP2, BIRC2, CASP9, NOD2, BIRC3	http://pathcards.genecards.org/card/nucleotide-binding_domain_leucine_rich_repeat_containing_receptor_(nlr)_signaling_pathways
10.5569	CDK-mediated Phosphorylation and Removal of Cdc6	880	54	SMS, CASP8, ABCB10, ABCC12, ABCG1, ABCC5, AGMAT, ABCB1, ABCC3, PSMD10, HIF1AN, DAPK1, ACTR8, PLCB1, HSPB1, CARD11, GSN, NEK2, SLC6A11, CREBBP, TRAF3, XIAP, PRKCG, SNAI2, UBB, KLHL12, UBE2D1, BIRC2, SLC25A15, GOT1, CASP9, PLCB3, DAPK3, VIM, OGT, BIRC3, CD207, CASP7, FN1, MOV10, CLTB, PSMC4, HSPA8, FZR1, CDC6, CDK2, PPP3R1, XPO1, LMNA, ODC1, RHOA, GMNN, MRC2, MRC1	http://pathcards.genecards.org/card/cdk-mediated_phosphorylation_and_removal_of_cdc6
10.5459	Putrescine Degradation III	10	4	ALDH2, ALDH3B2, PGM2, SAT2	http://pathcards.genecards.org/card/putrescine_degradation_iii
10.5459	Neurotransmitter Clearance In The Synaptic Cleft	10	4	ACHE, ALDH2, SLC6A3, BCHE	http://pathcards.genecards.org/card/neurotransmitter_clearance_in_the_synaptic_cleft
10.5324	Alanine, Aspartate and Glutamate Metabolism	37	7	ABAT, ALDH5A1, ADSL, FOLH1, ASRGL1, GOT1, GLUD1	http://pathcards.genecards.org/card/alanine_aspartate_and_glutamate_metabolism
10.3619	Complement and Coagulation Cascades	88	11	TFPI, MASP2, F5, CFB, ITGAM, F11, F2R, F8, PLG, C3, MBL2	http://pathcards.genecards.org/card/complement_and_coagulation_cascades
10.3102	Phospholipases	38	7	FAAH, PLA2G4A, PLCB1, PLA2G2A, PLA2G1B, PLD2, PLCB3	http://pathcards.genecards.org/card/phospholipases
10.2126	Formation of Fibrin Clot (Clotting Cascade)	50	8	TFPI, F5, C1QBP, KLK1, F11, F2R, F8, PLG	http://pathcards.genecards.org/card/formation_of_fibrin_clot_(clotting_cascade)
10.1034	Bile Secretion	90	11	ABCB1, ABCC3, SLC10A1, SLC2A1, SLCO1B3, AQP8, SLC10A2, BAAT, SLC22A7, NCEH1, SULT2A1	http://pathcards.genecards.org/card/bile_secretion

## Sheet: Control_Enriched gene Set
GeneAnalytics - Analysis Report			Prepared for: Tal Gordon (talgordon@mail.tau.ac.il)
			Date: 7/22/2021
Copyright © LifeMap Sciences, Inc.
Species	Mouse
Identified genes (869)
Symbol	Full Name	Aliases	GeneCards URL
Abat	4-aminobutyrate aminotransferase	9630038C02Rik, AI255750, GABA, Gabaat, Gabat, Gm9851, I54, Laibat, X61497	http://www.genecards.org/cgi-bin/carddisp.pl?gene=ABAT
Abcc5	ATP-binding cassette, sub-family C (CFTR/MRP), member 5	2900011L11Rik, AI132311, Abcc, Abcc5a, Abcc5b, Mr, Mrp5	http://www.genecards.org/cgi-bin/carddisp.pl?gene=ABCC5
Abcd2	ATP-binding cassette, sub-family D (ALD), member 2	A, ABC3, ABC39, AL, ALDL1, ALDR, ALDRP	http://www.genecards.org/cgi-bin/carddisp.pl?gene=ABCD2
Abhd14b	abhydrolase domain containing 14b	1810013B01Rik	http://www.genecards.org/cgi-bin/carddisp.pl?gene=ABHD14B
Abhd17c	abhydrolase domain containing 17C	2210412D01Rik, AL023007, Fam108, Fam108c, Fam108c1	http://www.genecards.org/cgi-bin/carddisp.pl?gene=ABHD17C
Abhd3	abhydrolase domain containing 3	AA675331, LAB, LABH3	http://www.genecards.org/cgi-bin/carddisp.pl?gene=ABHD3
Acad10	acyl-Coenzyme A dehydrogenase family, member 10	2410021P16Rik	http://www.genecards.org/cgi-bin/carddisp.pl?gene=ACAD10
Ache	acetylcholinesterase		http://www.genecards.org/cgi-bin/carddisp.pl?gene=ACHE
Acss2	acyl-CoA synthetase short-chain family member 2	1110017C11Rik, A, ACAS, ACS, Ac, Acas1, Acas2, AceC, AceCS1, Acs1, aceCS	http://www.genecards.org/cgi-bin/carddisp.pl?gene=ACSS2
Acvr1	activin A receptor, type 1	A, AL, ALK2, Ac, Act, ActR-I, ActRIA, Acv, Acvr, Acvr1a, Acvrlk2, Alk, Alk-2, Alk8, D330013D15Rik, SK, SKR1, Tsk, Tsk7L	http://www.genecards.org/cgi-bin/carddisp.pl?gene=ACVR1
Adam10	a disintegrin and metallopeptidase domain 10	1700031C13Rik, MADM, kuz, kuzb, kuzbanian	http://www.genecards.org/cgi-bin/carddisp.pl?gene=ADAM10
Adam12	a disintegrin and metallopeptidase domain 12 (meltrin alpha)	ADAM, Ml, Mltna	http://www.genecards.org/cgi-bin/carddisp.pl?gene=ADAM12
Adamts10	a disintegrin-like and metallopeptidase (reprolysin type) with thrombospondin type 1 motif, 10	9430006O18, AW045948, Adam-ts10, Adamts-10, Zn, Znmp	http://www.genecards.org/cgi-bin/carddisp.pl?gene=ADAMTS10
Adamts18	a disintegrin-like and metallopeptidase (reprolysin type) with thrombospondin type 1 motif, 18	9630038L21, ADAMTS21, E130314N14Rik	http://www.genecards.org/cgi-bin/carddisp.pl?gene=ADAMTS18
Adarb1	adenosine deaminase, RNA-specific, B1	1700057H01Rik, AD, AW124433, AW558573, Adar2, BB220382, D10Bwg0447e, RED, Red1	http://www.genecards.org/cgi-bin/carddisp.pl?gene=ADARB1
Adcy5	adenylate cyclase 5	AC, AW121902, Ac5	http://www.genecards.org/cgi-bin/carddisp.pl?gene=ADCY5
Adcy8	adenylate cyclase 8	AC, AC8, AW060868	http://www.genecards.org/cgi-bin/carddisp.pl?gene=ADCY8
Add1	adducin 1 (alpha)	AI256389	http://www.genecards.org/cgi-bin/carddisp.pl?gene=ADD1
Adgre1	adhesion G protein-coupled receptor E1	DD7A5-, DD7A5-7, EGF-TM7, Emr, Emr1, F4/80, Gpf480, Ly7, Ly71, TM7L, TM7LN3	http://www.genecards.org/cgi-bin/carddisp.pl?gene=ADGRE1
Adgrg7	adhesion G protein-coupled receptor G7	9130020O16Rik, Gpr1, Gpr128	http://www.genecards.org/cgi-bin/carddisp.pl?gene=ADGRG7
Adgrl3	adhesion G protein-coupled receptor L3	5430402I23Rik, CIRL-3, D130075K09Rik, Gm1379, LEC, LEC3, Lp, Lphn3, mKIAA0768	http://www.genecards.org/cgi-bin/carddisp.pl?gene=ADGRL3
Adipor2	adiponectin receptor 2	1110001I14Rik, ADCR2, AI115388, AW554121, D6Ucla, D6Ucla1e, Paqr2	http://www.genecards.org/cgi-bin/carddisp.pl?gene=ADIPOR2
Afdn	afadin, adherens junction formation factor	5033403D15Rik, AF, AF6, Af-6, Afadin, Gm314, I-a, I-afadin, Mll, Mllt4, S-a, S-afadin	http://www.genecards.org/cgi-bin/carddisp.pl?gene=AFDN
Aff2	AF4/FMR2 family, member 2	FMR2P, Fmr, Fmr2, Ox, Ox1, Ox19, Oxh	http://www.genecards.org/cgi-bin/carddisp.pl?gene=AFF2
Ahcyl2	S-adenosylhomocysteine hydrolase-like 2	4631427C17Rik, AI227036, Adohcyase3, mKIAA0828	http://www.genecards.org/cgi-bin/carddisp.pl?gene=AHCYL2
Ahr	aryl-hydrocarbon receptor	A, Ah, Ahh, Ahre, In, bHLHe7, bHLHe76	http://www.genecards.org/cgi-bin/carddisp.pl?gene=AHR
Akap13	A kinase (PRKA) anchor protein 13	1700026G02Rik, 5730522G15Rik, 5830460E08Rik, AKAP, AKAP-13, AKAP-Lbc, BRX, Ht31, LBC, PRO, PROT, PROTO-LB, PROTO-LBC	http://www.genecards.org/cgi-bin/carddisp.pl?gene=AKAP13
Akap7	A kinase (PRKA) anchor protein 7	6430401D08, AI662165, AKAP15, Aka, Akap18, BB170514	http://www.genecards.org/cgi-bin/carddisp.pl?gene=AKAP7
Alox5	arachidonate 5-lipoxygenase	5-L, 5-LO, 5-LOX, 5L, 5LO, 5LX, AI850497, F730011J02	http://www.genecards.org/cgi-bin/carddisp.pl?gene=ALOX5
Ampd2	adenosine monophosphate deaminase 2	1200014F01Rik, AI552571, Ampd, Ampd-2, m4521Da, m4521Dajl	http://www.genecards.org/cgi-bin/carddisp.pl?gene=AMPD2
Anapc5	anaphase-promoting complex subunit 5	2510006G12Rik, AA408751, AA536819, AA986414, APC5, Anpc5	http://www.genecards.org/cgi-bin/carddisp.pl?gene=ANAPC5
Angptl6	angiopoietin-like 6	6330404E11Rik, A, AG, AGF, ARP3, Arp5	http://www.genecards.org/cgi-bin/carddisp.pl?gene=ANGPTL6
Ank1	ankyrin 1, erythroid	Ank, Ank-1, nb, p, pale	http://www.genecards.org/cgi-bin/carddisp.pl?gene=ANK1
Ank2	ankyrin 2, brain	100043364, AI835472, AW491075, Ank, Ank-2, Anky, Gm4392	http://www.genecards.org/cgi-bin/carddisp.pl?gene=ANK2
Ankrd27	ankyrin repeat domain 27 (VPS9 domain)	AA408090, BC016493, D330003H11Rik, Varp	http://www.genecards.org/cgi-bin/carddisp.pl?gene=ANKRD27
Ankrd33b	ankyrin repeat domain 33B	0610012A05Rik, 3021401C12Rik, 5730557B15Rik	http://www.genecards.org/cgi-bin/carddisp.pl?gene=ANKRD33B
Ap1b1	adaptor protein complex AP-1, beta 1 subunit	Adtb, Adtb1, b2b1660C, b2b1660Clo	http://www.genecards.org/cgi-bin/carddisp.pl?gene=AP1B1
Ap2a2	adaptor-related protein complex 2, alpha 2 subunit	2410074K14Rik, AF006990, AW146353, Adt, Adtab, C78001, L2, L25	http://www.genecards.org/cgi-bin/carddisp.pl?gene=AP2A2
Apbb2	amyloid beta (A4) precursor protein-binding, family B, member 2	2310007D03Rik, FE65L, FE65L1, R, Rirl1, TR, TR2L, Zf, Zfra	http://www.genecards.org/cgi-bin/carddisp.pl?gene=APBB2
App	amyloid beta (A4) precursor protein	A, Abe, Abeta, Abpp, Adap, Ag, C, Cvap, E030013M08Rik, bet, betaApp	http://www.genecards.org/cgi-bin/carddisp.pl?gene=APP
Arf1	ADP-ribosylation factor 1		http://www.genecards.org/cgi-bin/carddisp.pl?gene=ARF1
Arfgap1	ADP-ribosylation factor GTPase activating protein 1	AI115377, Arf1gap	http://www.genecards.org/cgi-bin/carddisp.pl?gene=ARFGAP1
Arfgef2	ADP-ribosylation factor guanine nucleotide-exchange factor 2 (brefeldin A-inhibited)	AI463430, AW493672, BIG, BIG2, E230011G24Rik	http://www.genecards.org/cgi-bin/carddisp.pl?gene=ARFGEF2
Arfip2	ADP-ribosylation factor interacting protein 2	2310002N04Rik, POR, Por1	http://www.genecards.org/cgi-bin/carddisp.pl?gene=ARFIP2
Arhgap21	Rho GTPase activating protein 21	5530401C11Rik, AA416458, ARHG, ARHGAP10	http://www.genecards.org/cgi-bin/carddisp.pl?gene=ARHGAP21
Arhgap6	Rho GTPase activating protein 6	AI504284, RhoGA, RhoGAPX-1	http://www.genecards.org/cgi-bin/carddisp.pl?gene=ARHGAP6
Arhgef9	CDC42 guanine nucleotide exchange factor (GEF) 9	9630036L12Rik, coll	http://www.genecards.org/cgi-bin/carddisp.pl?gene=ARHGEF9
Arl6	ADP-ribosylation factor-like 6	1110018H24Rik, 2210411E14Rik, BBS, BBS3	http://www.genecards.org/cgi-bin/carddisp.pl?gene=ARL6
Arrb1	arrestin, beta 1	1200006I17Rik, AW208571, G430100A01Rik	http://www.genecards.org/cgi-bin/carddisp.pl?gene=ARRB1
Arrdc3	arrestin domain containing 3	AI450344, mKIAA1376	http://www.genecards.org/cgi-bin/carddisp.pl?gene=ARRDC3
Ash1l	ASH1 like histone lysine methyltransferase	8030453L17Rik, Ash1, E430018P19Rik, Kmt2h	http://www.genecards.org/cgi-bin/carddisp.pl?gene=ASH1L
Asphd2	aspartate beta-hydroxylase domain containing 2	2900006N09Rik, 9230106G13Rik	http://www.genecards.org/cgi-bin/carddisp.pl?gene=ASPHD2
Ate1	arginyltransferase 1	AI225793, AW547406	http://www.genecards.org/cgi-bin/carddisp.pl?gene=ATE1
Atf6	activating transcription factor 6	9130025P16Rik, 9630036G24, AA789574, Atf6alpha, ESTM4, ESTM49	http://www.genecards.org/cgi-bin/carddisp.pl?gene=ATF6
Atf7	activating transcription factor 7	1110012F10Rik, 9430065F09Rik, AI549878, C130020M04Rik	http://www.genecards.org/cgi-bin/carddisp.pl?gene=ATF7
Atg13	autophagy related 13	1110053A20Rik, D2Ertd391, D2Ertd391e, Harbi1	http://www.genecards.org/cgi-bin/carddisp.pl?gene=ATG13
Atg14	autophagy related 14	4832427M01, Atg14L, Ba, D14Ertd114, D14Ertd114e, D14Ertd436, D14Ertd436e	http://www.genecards.org/cgi-bin/carddisp.pl?gene=ATG14
Atl1	atlastin GTPase 1	4930435M24Rik, AD-, Adfsp, FS, Fsp1, SP, Spg3, Spg3a	http://www.genecards.org/cgi-bin/carddisp.pl?gene=ATL1
Atl2	atlastin GTPase 2	2010110I21Rik, AA407293, AV334690, Ai, Aip-2, Ar, Arl6ip2	http://www.genecards.org/cgi-bin/carddisp.pl?gene=ATL2
Atp10a	ATPase, class V, type 10A	Atp1, Atp10c, pf, pfatp	http://www.genecards.org/cgi-bin/carddisp.pl?gene=ATP10A
Atp13a4	ATPase type 13A4	4631413J11Rik, 4832416L12, 9330174J19Rik	http://www.genecards.org/cgi-bin/carddisp.pl?gene=ATP13A4
Atp6v0a1	ATPase, H+ transporting, lysosomal V0 subunit A1	AA959968, ATP6a1, Atp, Atp6n1, Atp6n1a, Atpv0a1, V, Vp, Vpp-1, Vpp1	http://www.genecards.org/cgi-bin/carddisp.pl?gene=ATP6V0A1
Atp6v0d1	ATPase, H+ transporting, lysosomal V0 subunit D1	AI267038, Ac3, Ac39, Atp, Atp6d, P3, P39, VATX, Vm, Vma6	http://www.genecards.org/cgi-bin/carddisp.pl?gene=ATP6V0D1
Atr	ataxia telangiectasia and Rad3 related		http://www.genecards.org/cgi-bin/carddisp.pl?gene=ATR
Atxn2l	ataxin 2-like	A, A2, A2D, A2LG, A2RP, A2lp, Atxnl2	http://www.genecards.org/cgi-bin/carddisp.pl?gene=ATXN2L
Avpr1a	arginine vasopressin receptor 1A	AVPR, Avpr1, V, V1a, V1aR	http://www.genecards.org/cgi-bin/carddisp.pl?gene=AVPR1A
B3galt4	UDP-Gal:betaGlcNAc beta 1,3-galactosyltransferase, polypeptide 4	Gal-, Gal-T2, Galt2	http://www.genecards.org/cgi-bin/carddisp.pl?gene=B3GALT4
B3gnt6	UDP-GlcNAc:betaGal beta-1,3-N-acetylglucosaminyltransferase 6 (core 3 synthase)	BC039789, Cor, Core, Core-3, Core3	http://www.genecards.org/cgi-bin/carddisp.pl?gene=B3GNT6
B3gnt7	UDP-GlcNAc:betaGal beta-1,3-N-acetylglucosaminyltransferase 7	C330001H22Rik, beta-3Gn, beta-3GnT7	http://www.genecards.org/cgi-bin/carddisp.pl?gene=B3GNT7
B9d1	B9 protein domain 1	AW045994, B9, Epp, Eppb9	http://www.genecards.org/cgi-bin/carddisp.pl?gene=B9D1
Bahcc1	BAH domain and coiled-coil containing 1	B930044J06, BC060615	http://www.genecards.org/cgi-bin/carddisp.pl?gene=BAHCC1
Bax	BCL2-associated X protein		http://www.genecards.org/cgi-bin/carddisp.pl?gene=BAX
Bbs5	Bardet-Biedl syndrome 5 (human)	1700049I01Rik, 2700023J09Rik	http://www.genecards.org/cgi-bin/carddisp.pl?gene=BBS5
Bcan	brevican	Csp, Cspg7	http://www.genecards.org/cgi-bin/carddisp.pl?gene=BCAN
Bcl3	B cell leukemia/lymphoma 3	AI528691, Bcl-, Bcl-3	http://www.genecards.org/cgi-bin/carddisp.pl?gene=BCL3
Best3	bestrophin 3	Vmd2, Vmd2l3, mBest, mBest4	http://www.genecards.org/cgi-bin/carddisp.pl?gene=BEST3
Bicra	BRD4 interacting chromatin remodeling complex associated protein	Glts, Gltscr1	http://www.genecards.org/cgi-bin/carddisp.pl?gene=BICRA
Birc3	baculoviral IAP repeat-containing 3	A, AW107670, Api1, Api2, Birc2, C-IAP2, HI, HIAP2, I, IAP1, IAP2, MI, MIAP1, MIAP2, MIH, MIHB, MIHC, RNF, RNF49, cI, cIA, cIAP-1, cIAP-2, cIAP1, cIAP2	http://www.genecards.org/cgi-bin/carddisp.pl?gene=BIRC3
Bnc2	basonuclin 2	5031434M05Rik, 8430420F16Rik	http://www.genecards.org/cgi-bin/carddisp.pl?gene=BNC2
Brsk2	BR serine/threonine kinase 2	4833424K13Rik, SA, SAD-A, SADA	http://www.genecards.org/cgi-bin/carddisp.pl?gene=BRSK2
Bscl2	Berardinelli-Seip congenital lipodystrophy 2 (seipin)	2900097C17Rik, AI046355, Gng3, Gng3lg, s	http://www.genecards.org/cgi-bin/carddisp.pl?gene=BSCL2
Bsdc1	BSD domain containing 1	1110063F24Rik, AW011758	http://www.genecards.org/cgi-bin/carddisp.pl?gene=BSDC1
Btbd10	BTB (POZ) domain containing 10	1110056N09Rik, Gmr, Gmrp1	http://www.genecards.org/cgi-bin/carddisp.pl?gene=BTBD10
C1galt1	core 1 synthase, glycoprotein-N-acetylgalactosamine 3-beta-galactosyltransferase, 1	2210410E06Rik, AV284120, T-synt, T-synthase	http://www.genecards.org/cgi-bin/carddisp.pl?gene=C1GALT1
C2cd3	C2 calcium-dependent domain containing 3	AU020772	http://www.genecards.org/cgi-bin/carddisp.pl?gene=C2CD3
C3	complement component 3	AI255234, ASP, HSE-MSF, Plp	http://www.genecards.org/cgi-bin/carddisp.pl?gene=C3
Cacfd1	calcium channel flower domain containing 1	5930434B04Rik, mFwe	http://www.genecards.org/cgi-bin/carddisp.pl?gene=CACFD1
Cacna2d3	calcium channel, voltage-dependent, alpha2/delta subunit 3	Cacnad3, alapha2delta3	http://www.genecards.org/cgi-bin/carddisp.pl?gene=CACNA2D3
Cacnb2	calcium channel, voltage-dependent, beta 2 subunit	AW060387, CAB2, Cavbe, Cavbeta2, Cchb2	http://www.genecards.org/cgi-bin/carddisp.pl?gene=CACNB2
Cadps	Ca2+-dependent secretion activator	AU067781, CA, CAPS, CAPS1, mKIAA1121	http://www.genecards.org/cgi-bin/carddisp.pl?gene=CADPS
Calhm6	calcium homeostasis modulator family member 6	A630077B13Rik, Fam26, Fam26f	http://www.genecards.org/cgi-bin/carddisp.pl?gene=CALHM6
Calm3	calmodulin 3	CaMA, Cam3, Camc, R75142	http://www.genecards.org/cgi-bin/carddisp.pl?gene=CALM3
Calm4	calmodulin 4	2310037J09Rik, AI649108, DD112, Sc, Scarf	http://www.genecards.org/cgi-bin/carddisp.pl?gene=CALML5
Camk2d	calcium/calmodulin-dependent protein kinase II, delta	2810011D23Rik, 8030469K03Rik, CaMK II, [d]-CaMKII	http://www.genecards.org/cgi-bin/carddisp.pl?gene=CAMK2D
Camk4	calcium/calmodulin-dependent protein kinase IV	A430110E23Rik, AI666733, CaM, CaMKI, CaMKIV, CaMKIV/Gr, D18Bwg0362e	http://www.genecards.org/cgi-bin/carddisp.pl?gene=CAMK4
Camkk1	calcium/calmodulin-dependent protein kinase kinase 1, alpha	AI846603, CaMKKalpha, Camkk, caM-KK 1, caM-KK alpha, caMKK 1, caMKK alpha	http://www.genecards.org/cgi-bin/carddisp.pl?gene=CAMKK1
Camsap1	calmodulin regulated spectrin-associated protein 1	9530003A05Rik, C77823, PRO2, PRO2405	http://www.genecards.org/cgi-bin/carddisp.pl?gene=CAMSAP1
Capn7	calpain 7	AU022319, Pa, PalBH	http://www.genecards.org/cgi-bin/carddisp.pl?gene=CAPN7
Capzb	capping protein (actin filament) muscle Z-line, beta	1700120C01Rik, AI325129, CPB, CPB1, CPB2, CPbeat2, CPbet, CPbeta1, CPbeta2, Cap, Cappb1	http://www.genecards.org/cgi-bin/carddisp.pl?gene=CAPZB
Carmil1	capping protein regulator and myosin 1 linker 1	1110037D04Rik, AI425970, CARMIL, CARML1, Ca, D130057M20, Lrr, Lrrc16, Lrrc16a	http://www.genecards.org/cgi-bin/carddisp.pl?gene=CARMIL1
Casd1	CAS1 domain containing 1	Cas, Cas1, Cast1, SOAT	http://www.genecards.org/cgi-bin/carddisp.pl?gene=CASD1
Casp2	caspase 2	CASP-2, Casp, ICH-1, Ich-, NEDD-2, Nedd, Nedd2	http://www.genecards.org/cgi-bin/carddisp.pl?gene=CASP2
Casp7	caspase 7	AI314680, CMH-1, ICE-, ICE-IAP3, Mch3, casp, caspase-7, mCASP-7	http://www.genecards.org/cgi-bin/carddisp.pl?gene=CASP7
Casp8	caspase 8	CASP-8, Casp, FLI, FLICE, MAC, MACH, Mch5	http://www.genecards.org/cgi-bin/carddisp.pl?gene=CASP8
Casr	calcium-sensing receptor	C, CaR, Gpr, Gprc2a	http://www.genecards.org/cgi-bin/carddisp.pl?gene=CASR
Cat	catalase	2210418N07, Ca, Cas, Cas-1, Cas1, Cs-, Cs-1	http://www.genecards.org/cgi-bin/carddisp.pl?gene=CAT
Cbl	Casitas B-lineage lymphoma	4732447J05Rik, Cbl-, Cbl-2, c-Cb, c-Cbl, cbl	http://www.genecards.org/cgi-bin/carddisp.pl?gene=CBL
Ccdc33	coiled-coil domain containing 33	4930535E21Rik, Gm1117, Tzip1	http://www.genecards.org/cgi-bin/carddisp.pl?gene=CCDC33
Ccdc50	coiled-coil domain containing 50	C3orf6	http://www.genecards.org/cgi-bin/carddisp.pl?gene=CCDC50
Cckar	cholecystokinin A receptor	AW106902	http://www.genecards.org/cgi-bin/carddisp.pl?gene=CCKAR
Ccn3	cellular communication network factor 3	C130088N23Rik, CCN, Nov	http://www.genecards.org/cgi-bin/carddisp.pl?gene=CCN3
Ccni	cyclin I		http://www.genecards.org/cgi-bin/carddisp.pl?gene=CCNI
Ccnl2	cyclin L2	1700010A01Rik, 1810019L15Rik, 2010319M22Rik, AA409936, AW261738, Ania-6b, HCLA-150, Pce, Pcee, SB138, ani	http://www.genecards.org/cgi-bin/carddisp.pl?gene=CCNL2
Ccr3	chemokine (C-C motif) receptor 3	CC-CKR, CC-CKR3, CKR, CKR3, Cmkbr, Cmkbr1l2, Cmkbr3	http://www.genecards.org/cgi-bin/carddisp.pl?gene=CCR3
Cct2	chaperonin containing Tcp1, subunit 2 (beta)	Cctb	http://www.genecards.org/cgi-bin/carddisp.pl?gene=CCT2
Cd209e	CD209e antigen	SI, SIGNR4, mSI, mSIGNR4	http://www.genecards.org/cgi-bin/carddisp.pl?gene=CD209
Cd40	CD40 antigen	AI326936, Bp5, Bp50, GP39, HIGM1, IGM, IMD3, T-BAM, TRAP, Tnfr, Tnfrsf5, p5, p50	http://www.genecards.org/cgi-bin/carddisp.pl?gene=CD40
Cdc42bpa	CDC42 binding protein kinase alpha	A930014J19Rik, DMPK-l, DMPK-like	http://www.genecards.org/cgi-bin/carddisp.pl?gene=CDC42BPA
Cdh23	cadherin 23 (otocadherin)	4930542A03Rik, USH1, USH1D, a, ahl, ahl1, bo, bob, bus, mdfw, nmf11, nmf112, nmf18, nmf181, nmf25, nmf252, sals, v	http://www.genecards.org/cgi-bin/carddisp.pl?gene=CDH23
Cdhr1	cadherin-related family member 1	Pcdh2, Pcdh21, Pr, Prcad, mKIAA1775	http://www.genecards.org/cgi-bin/carddisp.pl?gene=CDHR1
Cdk11b	cyclin-dependent kinase 11B	AA989746, CDK11-p11, CDK11-p110, CDK11-p4, CDK11-p46, CDK11-p5, CDK11-p58, Cdc11b, Cdc2l, Cdc2l1, Cdc2l2, Cdk11, p58	http://www.genecards.org/cgi-bin/carddisp.pl?gene=CDK11B
Cds1	CDP-diacylglycerol synthase 1	4833409J18Rik, AI314024, AW125888	http://www.genecards.org/cgi-bin/carddisp.pl?gene=CDS1
Cenpe	centromere protein E	312kD, 312kDa, AU019344, BC049989, C530022J18, CENP, CENP-E, Kif1, Kif10	http://www.genecards.org/cgi-bin/carddisp.pl?gene=CENPE
Cep41	centrosomal protein 41	1700017E11Rik, 2810431D15Rik, Cep4, Tsga, Tsga14	http://www.genecards.org/cgi-bin/carddisp.pl?gene=CEP41
Cep78	centrosomal protein 78	5730599I05Rik, D030027P05	http://www.genecards.org/cgi-bin/carddisp.pl?gene=CEP78
Ces2c	carboxylesterase 2C	ACH M1, CES 2, Ces, Ces2, ces2A3
Cfb	complement factor B	AI195813, AI255840, B, Bf, C2, Fb, H2-Bf	http://www.genecards.org/cgi-bin/carddisp.pl?gene=CFB
Chad	chondroadherin	S, SLRR4A	http://www.genecards.org/cgi-bin/carddisp.pl?gene=CHAD
Chadl	chondroadherin-like	AY100452, D930017K21Rik	http://www.genecards.org/cgi-bin/carddisp.pl?gene=CHADL
Chmp4b	charged multivesicular body protein 4B	2010012F05Rik, C76846, Snf7, Snf7-2	http://www.genecards.org/cgi-bin/carddisp.pl?gene=CHMP4B
Chrm3	cholinergic receptor, muscarinic 3, cardiac	Chrm-, Chrm-3, M3, M3R	http://www.genecards.org/cgi-bin/carddisp.pl?gene=CHRM3
Chst14	carbohydrate sulfotransferase 14	2600016L03Rik, D4ST-, D4ST-1, D4st, D4st1	http://www.genecards.org/cgi-bin/carddisp.pl?gene=CHST14
Chsy1	chondroitin sulfate synthase 1	skt	http://www.genecards.org/cgi-bin/carddisp.pl?gene=CHSY1
Chsy3	chondroitin sulfate synthase 3	4833446K15Rik, AI662215	http://www.genecards.org/cgi-bin/carddisp.pl?gene=CHSY3
Cib1	calcium and integrin binding 1 (calmyrin)	Cibkip, K, Kip, Prkdcip	http://www.genecards.org/cgi-bin/carddisp.pl?gene=CIB1
Cic	capicua transcriptional repressor	1200010B10Rik, mKIAA0306	http://www.genecards.org/cgi-bin/carddisp.pl?gene=CIC
Cish	cytokine inducible SH2-containing protein	C, CI, CIS-1, CIS1, Cis, F17, F23, SOCS	http://www.genecards.org/cgi-bin/carddisp.pl?gene=CISH
Clasp2	CLIP associating protein 2	1500004F14Rik, 8030404L10Rik, C77448, CL, CLA, CLASP, CLASP2beta, mKIAA0627	http://www.genecards.org/cgi-bin/carddisp.pl?gene=CLASP2
Clcn2	chloride channel, voltage-sensitive 2	AL118368, ClC-, ClC-2, Clc, Clc2, nmf24, nmf240	http://www.genecards.org/cgi-bin/carddisp.pl?gene=CLCN2
Cldn19	claudin 19		http://www.genecards.org/cgi-bin/carddisp.pl?gene=CLDN19
Clip1	CAP-GLY domain containing linker protein 1	1110007I12Rik, 4631429H07Rik, AV017631, C81039, CLIP-, CLIP-170, CLIP170, CYLN1, Cli, Clip50, Rsn, mKIAA4046, re, restin	http://www.genecards.org/cgi-bin/carddisp.pl?gene=CLIP1
Cluap1	clusterin associated protein 1	2310030D15Rik, 2610111M03Rik	http://www.genecards.org/cgi-bin/carddisp.pl?gene=CLUAP1
Cmpk1	cytidine monophosphate (UMP-CMP) kinase 1	0610011D08Rik, CK, Cmp, Cmpk, UMP-CMPk	http://www.genecards.org/cgi-bin/carddisp.pl?gene=CMPK1
Cnbd2	cyclic nucleotide binding domain containing 2	4921517L17Rik, 5430421B09Rik, Cris	http://www.genecards.org/cgi-bin/carddisp.pl?gene=CNBD2
Cndp2	CNDP dipeptidase 2 (metallopeptidase M20 family)	0610010E05Rik, C76600, Cn, Cn2, Dip, Dip-2, Pe, Pep, Pep-1, Pep1	http://www.genecards.org/cgi-bin/carddisp.pl?gene=CNDP2
Cnn2	calponin 2	AA408047, AI324678, Ca, Calpo2, h2-c	http://www.genecards.org/cgi-bin/carddisp.pl?gene=CNN2
Cnnm2	cyclin M2	AU015877, AW048635, Acd, Acdp2, Clp2	http://www.genecards.org/cgi-bin/carddisp.pl?gene=CNNM2
Cnot9	CCR4-NOT transcription complex, subunit 9	2610007F23Rik, AI593551, FL1, Fl10, Rqcd, Rqcd1	http://www.genecards.org/cgi-bin/carddisp.pl?gene=CNOT9
Cntn4	contactin 4	9630050B05, Axc, Axcam, BIG-, BIG-2	http://www.genecards.org/cgi-bin/carddisp.pl?gene=CNTN4
Cog2	component of oligomeric golgi complex 2	1190002B08Rik, 2700012E02Rik, C86089, Cog, Ldlc	http://www.genecards.org/cgi-bin/carddisp.pl?gene=COG2
Cog5	component of oligomeric golgi complex 5	5430405C01Rik, C87247, D18362, GOLT, GOLTC1, GTC90	http://www.genecards.org/cgi-bin/carddisp.pl?gene=COG5
Col12a1	collagen, type XII, alpha 1		http://www.genecards.org/cgi-bin/carddisp.pl?gene=COL12A1
Col6a4	collagen, type VI, alpha 4	1110001D15Rik, AI413310, AU023415, Dv, Dvwa, EG235580, Vw, Vwa6
Colec11	collectin sub-family member 11	CL-K1	http://www.genecards.org/cgi-bin/carddisp.pl?gene=COLEC11
Copg2	coatomer protein complex, subunit gamma 2	AW227625, gamma-2-COP	http://www.genecards.org/cgi-bin/carddisp.pl?gene=COPG2
Cox15	cytochrome c oxidase assembly protein 15	2900026G05Rik	http://www.genecards.org/cgi-bin/carddisp.pl?gene=COX15
Cpd	carboxypeptidase D	AA960140, AW322530, D830034L15Rik	http://www.genecards.org/cgi-bin/carddisp.pl?gene=CPD
Cpeb2	cytoplasmic polyadenylation element binding protein 2	A630055H10Rik, Cpe-bp2	http://www.genecards.org/cgi-bin/carddisp.pl?gene=CPEB2
Cpn2	carboxypeptidase N, polypeptide 2	1300018K11Rik	http://www.genecards.org/cgi-bin/carddisp.pl?gene=CPN2
Cpne8	copine VIII	1200003E11Rik, 1500031E20Rik	http://www.genecards.org/cgi-bin/carddisp.pl?gene=CPNE8
Creb3l3	cAMP responsive element binding protein 3-like 3	BC010786, CREB-, CREB-H, D10Bur1, D10Bur1e	http://www.genecards.org/cgi-bin/carddisp.pl?gene=CREB3L3
Crhr1	corticotropin releasing hormone receptor 1	CRF, CRF-R, CRF1R, CRFR1, Crhr	http://www.genecards.org/cgi-bin/carddisp.pl?gene=CRHR1
Cript	cysteine-rich PDZ-binding protein	1200020A08Rik, AA589469, CR	http://www.genecards.org/cgi-bin/carddisp.pl?gene=CRIPT
Crkl	v-crk avian sarcoma virus CT10 oncogene homolog-like	1110025F07Rik, AA589403, AI325100, Cr, Crkol, snoop	http://www.genecards.org/cgi-bin/carddisp.pl?gene=CRKL
Cryzl2	crystallin zeta like 2
Csgalnact2	chondroitin sulfate N-acetylgalactosaminyltransferase 2	4632415D10Rik, Galn, Galnact2	http://www.genecards.org/cgi-bin/carddisp.pl?gene=CSGALNACT2
Csnk2a1	casein kinase 2, alpha 1 polypeptide	CK2, Csnk2a, Csnk2a1-rs4	http://www.genecards.org/cgi-bin/carddisp.pl?gene=CSNK2A1
Cspp1	centrosome and spindle pole associated protein 1	2310020J12Rik, 4930413O22Rik, AA387550, BC055915, Cspp2, Cspp3	http://www.genecards.org/cgi-bin/carddisp.pl?gene=CSPP1
Csrnp3	cysteine-serine-rich nuclear protein 3	A330102K23Rik, CSR, CSRNP-3, Csnrp3, Mbu1, taip-2	http://www.genecards.org/cgi-bin/carddisp.pl?gene=CSRNP3
Ctbs	chitobiase	2210401K11Rik, CTB	http://www.genecards.org/cgi-bin/carddisp.pl?gene=CTBS
Ctdspl2	CTD (carboxy-terminal domain, RNA polymerase II, polypeptide A) small phosphatase like 2	D2Ertd485, D2Ertd485e, SC, SCP4	http://www.genecards.org/cgi-bin/carddisp.pl?gene=CTDSPL2
Cuedc1	CUE domain containing 1	AI841487, C330016O16Rik	http://www.genecards.org/cgi-bin/carddisp.pl?gene=CUEDC1
Cul9	cullin 9	1810035I07Rik, Cul-9, P, Parc, mKIAA0708	http://www.genecards.org/cgi-bin/carddisp.pl?gene=CUL9
Cyld	CYLD lysine 63 deubiquitinase	2010013M14Rik, 2900009M21Rik, C130039D01Rik, CDMT, CYLD1, EAC, mKIAA0849	http://www.genecards.org/cgi-bin/carddisp.pl?gene=CYLD
Cyp11a1	cytochrome P450, family 11, subfamily a, polypeptide 1	Cyp1, Cyp11a, Cypxia1, D9Ertd411, D9Ertd411e, P450s, P450scc, Sc, Scc, csc, cscc	http://www.genecards.org/cgi-bin/carddisp.pl?gene=CYP11A1
Cyp24a1	cytochrome P450, family 24, subfamily a, polypeptide 1	24-OH, 24-OHase, CP2, CP24, Cyp2, Cyp24	http://www.genecards.org/cgi-bin/carddisp.pl?gene=CYP24A1
Cyp2u1	cytochrome P450, family 2, subfamily u, polypeptide 1	8430436A10Rik	http://www.genecards.org/cgi-bin/carddisp.pl?gene=CYP2U1
Cyp3a41a	cytochrome P450, family 3, subfamily a, polypeptide 41A	Cyp3a, Cyp3a41	http://www.genecards.org/cgi-bin/carddisp.pl?gene=CYP3A5
Dab2ip	disabled 2 interacting protein	2310011D08Rik, A, AI480459, Aip1, mKIAA1743	http://www.genecards.org/cgi-bin/carddisp.pl?gene=DAB2IP
Dapp1	dual adaptor for phosphotyrosine and 3-phosphoinositides 1	Bam3, Bam32	http://www.genecards.org/cgi-bin/carddisp.pl?gene=DAPP1
Dbh	dopamine beta hydroxylase		http://www.genecards.org/cgi-bin/carddisp.pl?gene=DBH
Dcaf11	DDB1 and CUL4 associated factor 11	0710008A13Rik, C76035, D14Ucl, D14Ucla1, Dacf11, GLO, GLO14, Wdr2, Wdr23	http://www.genecards.org/cgi-bin/carddisp.pl?gene=DCAF11
Dcbld2	discoidin, CUB and LCCL domain containing 2	1700055P21Rik, AW146002, CLC, CLCP1, Es, Esdn	http://www.genecards.org/cgi-bin/carddisp.pl?gene=DCBLD2
Dcp2	decapping mRNA 2	2410015D23Rik, 5730537H01Rik, AL118268	http://www.genecards.org/cgi-bin/carddisp.pl?gene=DCP2
Dctn3	dynactin 3	p2, p24	http://www.genecards.org/cgi-bin/carddisp.pl?gene=DCTN3
Ddx31	DEAD/H box helicase 31	5830444G11Rik, Gm997	http://www.genecards.org/cgi-bin/carddisp.pl?gene=DDX31
Ddx58	DEAD/H box helicase 58	6430573D20Rik, C330021E21, RI, RIG-I, RLR-1	http://www.genecards.org/cgi-bin/carddisp.pl?gene=DDX58
Degs2	delta(4)-desaturase, sphingolipid 2	2210008A03Rik, AI852933, DES2, Des	http://www.genecards.org/cgi-bin/carddisp.pl?gene=DEGS2
Dele1	DAP3 binding cell death enhancer 1	0610009O20Rik, 2700004E22Rik, DELE1(L), Dele, Kiaa0141	http://www.genecards.org/cgi-bin/carddisp.pl?gene=DELE1
Deptor	DEP domain containing MTOR-interacting protein	D15Ertd336, D15Ertd597, Depdc, Depdc6	http://www.genecards.org/cgi-bin/carddisp.pl?gene=DEPTOR
Dgkd	diacylglycerol kinase, delta	AI841987, D330025K09, DGKdel, DGKdelta, dgkd-2	http://www.genecards.org/cgi-bin/carddisp.pl?gene=DGKD
Dhrs4	dehydrogenase/reductase (SDR family) member 4	AI043103, AI790593, CR, D14Ucl, D14Ucla2, NDRD, PHCR, PSCD, R, RRD, mouNRDR	http://www.genecards.org/cgi-bin/carddisp.pl?gene=DHRS4
Diras2	DIRAS family, GTP-binding RAS-like 2	2900052J15Rik, AI414999	http://www.genecards.org/cgi-bin/carddisp.pl?gene=DIRAS2
Dlg2	discs large MAGUK scaffold protein 2	A330103J02Rik, B230218P12Rik, B330007M19Rik, Chapsyn, Dlgh, Dlgh2, Gm1197, Gm21505, PSD, PSD93	http://www.genecards.org/cgi-bin/carddisp.pl?gene=DLG2
Dlg5	discs large MAGUK scaffold protein 5	4933429D20Rik, T25557, mKIAA0583	http://www.genecards.org/cgi-bin/carddisp.pl?gene=DLG5
Dlgap5	DLG associated protein 5	C77459, C86398, Dap-5, Dlg, Dlg7, Hu, Hurp, mKIAA0008	http://www.genecards.org/cgi-bin/carddisp.pl?gene=DLGAP5
Dmbt1	deleted in malignant brain tumors 1	CRP, CRP-, CRP-[, CRP-[a], CRP-[b], Cr, Crpd, DBMT1, MUC, ebn, gp30, gp300, he, p80	http://www.genecards.org/cgi-bin/carddisp.pl?gene=DMBT1
Dmrt2	doublesex and mab-3 related transcription factor 2	Te, Terra	http://www.genecards.org/cgi-bin/carddisp.pl?gene=DMRT2
Dmxl2	Dmx-like 2	6330586A12, 6430411K14Rik, E130119P06Rik, mKIAA0856	http://www.genecards.org/cgi-bin/carddisp.pl?gene=DMXL2
Dnaaf2	dynein, axonemal assembly factor 2	Ktu, TU54, kin, kintoun, mknt	http://www.genecards.org/cgi-bin/carddisp.pl?gene=DNAAF2
Dnaaf3	dynein, axonemal assembly factor 3	6030429G01Rik, b2b1739C, b2b1739Clo	http://www.genecards.org/cgi-bin/carddisp.pl?gene=DNAAF3
Dnah1	dynein, axonemal, heavy chain 1	B230373P09Rik, Dnah, Dnahc1, E030034C22Rik, MDHC7	http://www.genecards.org/cgi-bin/carddisp.pl?gene=DNAH1
Dnah5	dynein, axonemal, heavy chain 5	AU022615, Dnah, Dnahc5, Mdna, Mdnah5, b2b1134C, b2b1134Clo, b2b1154C, b2b1154Clo, b2b1537C, b2b1537Clo, b2b1565C, b2b1565Clo, b2b3491C, b2b3491Clo, b2b601Clo, mKIAA1603	http://www.genecards.org/cgi-bin/carddisp.pl?gene=DNAH5
Dnajb8	DnaJ heat shock protein family (Hsp40) member B8	1700016F14Rik, 1700031F10Rik, AI326313, mDj6	http://www.genecards.org/cgi-bin/carddisp.pl?gene=DNAJB8
Dnajc12	DnaJ heat shock protein family (Hsp40) member C12	Jdp, Jdp1, mJDP, mJDP1	http://www.genecards.org/cgi-bin/carddisp.pl?gene=DNAJC12
Dock9	dedicator of cytokinesis 9	AA959601, AW538057, B230309H04Rik, D14Wsu89, D14Wsu89e, Zizi, Zizimin1, mKIAA1058	http://www.genecards.org/cgi-bin/carddisp.pl?gene=DOCK9
Dop1a	DOP1 leucine zipper like protein A	B130005I07Rik, BC035275, C130028L17, D9Ertd809, D9Ertd809e, Dope, Dopey1	http://www.genecards.org/cgi-bin/carddisp.pl?gene=DOP1A
Dsel	dermatan sulfate epimerase-like	9330132E09Rik, DS-e, DS-epi2	http://www.genecards.org/cgi-bin/carddisp.pl?gene=DSEL
Dtx3l	deltex 3-like, E3 ubiquitin ligase	AU042200, BC023741	http://www.genecards.org/cgi-bin/carddisp.pl?gene=DTX3L
Dusp14	dual specificity phosphatase 14	1110014C10Rik, 2310042C07Rik, D11Ertd395, D11Ertd395e, MKP-L, Mkp, Mkp6	http://www.genecards.org/cgi-bin/carddisp.pl?gene=DUSP14
Dusp8	dual specificity phosphatase 8	5530400B01Rik, AI593498, Ntt, Nttp1	http://www.genecards.org/cgi-bin/carddisp.pl?gene=DUSP8
Ece2	endothelin converting enzyme 2	1810009K13Rik, 6330509A19Rik, 9630025D12Rik, BB127715, Ece-2, Eef1akmt4-Ece2	http://www.genecards.org/cgi-bin/carddisp.pl?gene=ECE2
Edem1	ER degradation enhancer, mannosidase alpha-like 1	A130059K23Rik, EDEM, mKIAA0212	http://www.genecards.org/cgi-bin/carddisp.pl?gene=EDEM1
Edil3	EGF-like repeats and discoidin I-like domains 3	Del, Del-, Del-1, Del1, Sox2-cre, Sox2Cre, Tg(Sox2-cre)1Amc	http://www.genecards.org/cgi-bin/carddisp.pl?gene=EDIL3
Efna4	ephrin A4	EFL-, EFL-4, Ep, Epl4, LERK, LERK-4	http://www.genecards.org/cgi-bin/carddisp.pl?gene=EFNA4
Efnb2	ephrin B2	ELF-, ELF-2, Ep, Epl, Epl5, Eplg5, Htk-, Htk-L, LERK, LERK-5, Ler, Lerk5, NLER, NLERK-1	http://www.genecards.org/cgi-bin/carddisp.pl?gene=EFNB2
Egfr	epidermal growth factor receptor	9030024J15Rik, AI552599, Erb, Erbb, Err, Errb1, Errp, Wa, Wa5, wa-2, wa2	http://www.genecards.org/cgi-bin/carddisp.pl?gene=EGFR
Ehbp1	EH domain binding protein 1	AF424697, Flj21950, NACSIN	http://www.genecards.org/cgi-bin/carddisp.pl?gene=EHBP1
Ehd1	EH-domain containing 1	AA409636, Pa, Past1, RME-, RME-1	http://www.genecards.org/cgi-bin/carddisp.pl?gene=EHD1
Eif3c	eukaryotic translation initiation factor 3, subunit C	110kD, 110kDa, 3230401O13Rik, Eif3, Eif3s8, NIP, NIPIL(A3), NipilA3, X, Xs, Xsl	http://www.genecards.org/cgi-bin/carddisp.pl?gene=EIF3C
Elapor2	endosome-lysosome associated apoptosis and autophagy regulator family member 2	9330182L06Rik, Eig121l	http://www.genecards.org/cgi-bin/carddisp.pl?gene=ELAPOR2
Enpp3	ectonucleotide pyrophosphatase/phosphodiesterase 3	AI876438, CD203c	http://www.genecards.org/cgi-bin/carddisp.pl?gene=ENPP3
Entpd5	ectonucleoside triphosphate diphosphohydrolase 5	AI196558, AI987697, Cd39l, Cd39l4, ER-UD, ER-UDPase, NTPD, NTPDa, NTPDase-5, NTPDase5, Pc, Pcph, mNT, mNTPase	http://www.genecards.org/cgi-bin/carddisp.pl?gene=ENTPD5
Ep300	E1A binding protein p300	A430090G16, A730011L11, KAT3, KAT3B, p30, p300, p300 HAT	http://www.genecards.org/cgi-bin/carddisp.pl?gene=EP300
Epb41l5	erythrocyte membrane protein band 4.1 like 5	1700030C16Rik, AL022914, BE37, E230025E14Rik, Epb4.1, Epb4.1l5, Lul, Lulu1, NB, NBL5	http://www.genecards.org/cgi-bin/carddisp.pl?gene=EPB41L5
Epg5	ectopic P-granules autophagy protein 5 homolog (C. elegans)	4732475F16, 5430411K18Rik, AI661957, AW456499	http://www.genecards.org/cgi-bin/carddisp.pl?gene=EPG5
Ephb2	Eph receptor B2	Cek5, Dr, Drt, ETECK, Er, Erk, Hek5, Nu, Nuk, Prk, Prkm5, Qek5, Sek, Sek3, Tyr, Tyro5	http://www.genecards.org/cgi-bin/carddisp.pl?gene=EPHB2
Epn2	epsin 2	9530051D10Rik, AA536924, Ib, Ibp2	http://www.genecards.org/cgi-bin/carddisp.pl?gene=EPN2
Erap1	endoplasmic reticulum aminopeptidase 1	A-LAP, ARTS-1, Ar, Arts1, E, ERAAP, PILSA, PILSAP	http://www.genecards.org/cgi-bin/carddisp.pl?gene=ERAP1
Erc2	ELKS/RAB6-interacting/CAST family member 2	6430531D06, CA, CAST, CAST1/ERC2, D14Ertd171, D14Ertd171e, ELKS, ELKS2alpha	http://www.genecards.org/cgi-bin/carddisp.pl?gene=ERC2
Ern1	endoplasmic reticulum (ER) to nucleus signalling 1	9030414B18Rik, AI225830, C85377, Ir, Ire, Ire1a, Ire1alpha, Ire1p	http://www.genecards.org/cgi-bin/carddisp.pl?gene=ERN1
Ern2	endoplasmic reticulum (ER) to nucleus signalling 2	Ern1, Ire, Ire1, Ire1b, ire1-beta, mIre1	http://www.genecards.org/cgi-bin/carddisp.pl?gene=ERN2
Esyt2	extended synaptotagmin-like protein 2	2410017M09Rik, 4921504I16Rik, CHR2SYT, D12Ertd551, D12Ertd551e, Fam62, Fam62b	http://www.genecards.org/cgi-bin/carddisp.pl?gene=ESYT2
Ethe1	ethylmalonic encephalopathy 1	0610025L15Rik, Hsco	http://www.genecards.org/cgi-bin/carddisp.pl?gene=ETHE1
Ets1	E26 avian leukemia oncogene 1, 5' domain	AI196000, AI448617, D230050P06, Ets-, Ets-1, Tp, Tpl1, p42Ets, p51Ets, p54, vs	http://www.genecards.org/cgi-bin/carddisp.pl?gene=ETS1
Etv4	ets variant 4	AW414408, Pe, Pea, Pea-3, Pea3	http://www.genecards.org/cgi-bin/carddisp.pl?gene=ETV4
Exoc8	exocyst complex component 8	AI414418, EXO8, EXO84, Exo84p, R74783, SEC8, SEC84	http://www.genecards.org/cgi-bin/carddisp.pl?gene=EXOC8
Exosc10	exosome component 10	PM-, PM-Scl, PM/Scl-, PM/Scl-100, Pms, Pmscl2, R, RRP6, p, p2, p3, p4	http://www.genecards.org/cgi-bin/carddisp.pl?gene=EXOSC10
Exosc9	exosome component 9	PM/Scl, PM/Scl-75, Pms, Pmscl1, RR, RRP45, p, p5, p6	http://www.genecards.org/cgi-bin/carddisp.pl?gene=EXOSC9
Ext2	exostosin glycosyltransferase 2	AI893565	http://www.genecards.org/cgi-bin/carddisp.pl?gene=EXT2
Eya4	EYA transcriptional coactivator and phosphatase 4	B130023L16Rik	http://www.genecards.org/cgi-bin/carddisp.pl?gene=EYA4
Fa2h	fatty acid 2-hydroxylase	FAAH, Faxdc, Faxdc1, G630055L08Rik	http://www.genecards.org/cgi-bin/carddisp.pl?gene=FA2H
Faim2	Fas apoptotic inhibitory molecule 2	2900002L20Rik, Lf, Lfg, Lfg2, NMP, NMP25, Nmp35, Tmbim, Tmbim2, lifeg	http://www.genecards.org/cgi-bin/carddisp.pl?gene=FAIM2
Fam221a	family with sequence similarity 221, member A	D330028D13Rik	http://www.genecards.org/cgi-bin/carddisp.pl?gene=FAM221A
Fank1	fibronectin type 3 and ankyrin repeat domains 1	1700007B22Rik, AI850911, FANK1S	http://www.genecards.org/cgi-bin/carddisp.pl?gene=FANK1
Fbn2	fibrillin 2	BC063774, Fib-, Fib-2, mKIAA4226, s, sne, sy	http://www.genecards.org/cgi-bin/carddisp.pl?gene=FBN2
Fbxo11	F-box protein 11	C80048, Jf	http://www.genecards.org/cgi-bin/carddisp.pl?gene=FBXO11
Fbxo21	F-box protein 21	2810425J22Rik, AU016673	http://www.genecards.org/cgi-bin/carddisp.pl?gene=FBXO21
Fcho2	FCH domain only 2	5832424M12Rik, AA387320	http://www.genecards.org/cgi-bin/carddisp.pl?gene=FCHO2
Fermt2	fermitin family member 2	AA960555, Kind, Kindlin-2, Mig, Mig2, Plekh, Plekhc1	http://www.genecards.org/cgi-bin/carddisp.pl?gene=FERMT2
Fgfr1	fibroblast growth factor receptor 1	AW208770, Ea, Eask, FGFR, FGFR-I, FLG, Fgfr-, Fgfr-1, Flt-, Flt-2, Fr, Fr1, Hs, Hspy, MFR, bFGF-R-1, c-fgr	http://www.genecards.org/cgi-bin/carddisp.pl?gene=FGFR1
Fgfr3	fibroblast growth factor receptor 3	CD333, FR3, Fgfr-, Fgfr-3, Flg-2, HBGF, HBGFR, Mfr3, sa, sam3	http://www.genecards.org/cgi-bin/carddisp.pl?gene=FGFR3
Fibcd1	fibrinogen C domain containing 1	AI448887	http://www.genecards.org/cgi-bin/carddisp.pl?gene=FIBCD1
Filip1	filamin A interacting protein 1	5730485H21Rik, AI843021, F	http://www.genecards.org/cgi-bin/carddisp.pl?gene=FILIP1
Fkbp8	FK506 binding protein 8	38kD, 38kDa, FKBP-38, FKBP-8, FKBPR38, Fkbp3, Fkbp38, mFKBP38	http://www.genecards.org/cgi-bin/carddisp.pl?gene=FKBP8
Fli1	Friend leukemia integration 1	EWS, EWSR2, Fli, Fli-1, SIC, SIC-1, Si, Sic1	http://www.genecards.org/cgi-bin/carddisp.pl?gene=FLI1
Flot2	flotillin 2	AI573412, E, Esa, reggie, reggie-2	http://www.genecards.org/cgi-bin/carddisp.pl?gene=FLOT2
Fnip2	folliculin interacting protein 2	D630023B12Rik, mKIAA1450	http://www.genecards.org/cgi-bin/carddisp.pl?gene=FNIP2
Foxj3	forkhead box J3	C330039G02Rik, Fhd6	http://www.genecards.org/cgi-bin/carddisp.pl?gene=FOXJ3
Foxp2	forkhead box P2	2810043D05Rik, AI449000, CAG-16, D0Kis, D0Kist7	http://www.genecards.org/cgi-bin/carddisp.pl?gene=FOXP2
Foxq1	forkhead box Q1	HFH-1, Hfh1, Hfh1l, sa	http://www.genecards.org/cgi-bin/carddisp.pl?gene=FOXQ1
Frmpd4	FERM and PDZ domain containing 4	Gm196, P, PK, PKAP1, Pdzd1, Pdzd10, Pdzk1, Pdzk10, Pr, Preso1, preso	http://www.genecards.org/cgi-bin/carddisp.pl?gene=FRMPD4
Fsd1l	fibronectin type III and SPRY domain containing 1-like	A230072O16Rik, Ccdc10, Csdufd, Csdufd1, Fsd, Fsd1nl	http://www.genecards.org/cgi-bin/carddisp.pl?gene=FSD1L
Fut7	fucosyltransferase 7	AI853193, FT, FTVII, Fuc-T, Fuc-TVII, FucT-, FucT-VII	http://www.genecards.org/cgi-bin/carddisp.pl?gene=FUT7
Fut8	fucosyltransferase 8		http://www.genecards.org/cgi-bin/carddisp.pl?gene=FUT8
Gabbr2	gamma-aminobutyric acid (GABA) B receptor, 2	GABABR2, Gaba, Gb2, Gm425, Gpr, Gpr51	http://www.genecards.org/cgi-bin/carddisp.pl?gene=GABBR2
Gabpb2	GA repeat binding protein, beta 2	1810015F01Rik, 5830427M07, 9430006E19Rik, A430024B14Rik, AV050852, Gabpb2-1	http://www.genecards.org/cgi-bin/carddisp.pl?gene=GABPB2
Gad1	glutamate decarboxylase 1	EP1, EP10, GAD2, GAD4, GAD6, Gad-, Gad-1	http://www.genecards.org/cgi-bin/carddisp.pl?gene=GAD1
Gale	galactose-4-epimerase, UDP	2310002A12Rik, AI323962	http://www.genecards.org/cgi-bin/carddisp.pl?gene=GALE
Galnt6	polypeptide N-acetylgalactosaminyltransferase 6	4632410F13, AW047994, GalNA, GalNAc-T6	http://www.genecards.org/cgi-bin/carddisp.pl?gene=GALNT6
Galnt7	polypeptide N-acetylgalactosaminyltransferase 7	AI225872	http://www.genecards.org/cgi-bin/carddisp.pl?gene=GALNT7
Galr2	galanin receptor 2	Ga, mG, mGalR	http://www.genecards.org/cgi-bin/carddisp.pl?gene=GALR2
Gas7	growth arrest specific 7	AW124766, B230343A10Rik, Gas7-, Gas7-cb	http://www.genecards.org/cgi-bin/carddisp.pl?gene=GAS7
Gch1	GTP cyclohydrolase 1	GTP-C, GTP-CH, GTP-CH-I, GTPC, GTPCH, Gch	http://www.genecards.org/cgi-bin/carddisp.pl?gene=GCH1
Gdpd5	glycerophosphodiester phosphodiesterase domain containing 5	BC024955, Gde2	http://www.genecards.org/cgi-bin/carddisp.pl?gene=GDPD5
Gfm1	G elongation factor, mitochondrial 1	AW545374, D3Wsu133, D3Wsu133e, Gfm	http://www.genecards.org/cgi-bin/carddisp.pl?gene=GFM1
Gga3	golgi associated, gamma adaptin ear containing, ARF binding protein 3	C230037M19Rik, mKIAA0154	http://www.genecards.org/cgi-bin/carddisp.pl?gene=GGA3
Ghsr	growth hormone secretagogue receptor	C530020I22Rik, GHRP, GHS-R, Ghs, Ghsr1a	http://www.genecards.org/cgi-bin/carddisp.pl?gene=GHSR
Glb1	galactosidase, beta 1	AW125515, Bg, Bge, Bgl, Bgl-, Bgl-e, Bgl-s, Bgl-t, Bgs, Bgt, C130097A14Rik	http://www.genecards.org/cgi-bin/carddisp.pl?gene=GLB1
Glipr1	GLI pathogenesis-related 1 (glioma)	2410114O14Rik, RT, RTV, RTVP-1, RTVP1, mRTV, mRTVP-1	http://www.genecards.org/cgi-bin/carddisp.pl?gene=GLIPR1
Glipr1l1	GLI pathogenesis-related 1 like 1	1700011E04Rik	http://www.genecards.org/cgi-bin/carddisp.pl?gene=GLIPR1L1
Gm12695	predicted gene 12695		http://www.genecards.org/cgi-bin/carddisp.pl?gene=C1orf87
Gmeb2	glucocorticoid modulatory element binding protein 2	AI839884	http://www.genecards.org/cgi-bin/carddisp.pl?gene=GMEB2
Gnai1	guanine nucleotide binding protein (G protein), alpha inhibiting 1	AU046200, Gia, Gialpha1, Gnai-1	http://www.genecards.org/cgi-bin/carddisp.pl?gene=GNAI1
Gnas	GNAS (guanine nucleotide binding protein, alpha stimulating) complex locus	5530400H20Rik, A930027G11Rik, C130027O20Rik, G, GPSA, GSP, Ga, Galphas, Gn, Gnas1, Gnasxl, Gs-, Gs-alpha, Gsa, N, Nes, Nesp, Nesp55, Nespl, Oed, Oed-Sml, Oedsml, P, P1, P2, P3, PHP1A, PHP1B, POH, SCG, SCG6, XL	http://www.genecards.org/cgi-bin/carddisp.pl?gene=GNAS
Gnrhr	gonadotropin releasing hormone receptor		http://www.genecards.org/cgi-bin/carddisp.pl?gene=GNRHR
Golga4	golgi autoantigen, golgin subfamily a, 4	AI225887, AU019508, Ol, Olp-1, golgin	http://www.genecards.org/cgi-bin/carddisp.pl?gene=GOLGA4
Golph3	golgi phosphoprotein 3	4733401N08Rik, 5730410D03Rik, AW413496	http://www.genecards.org/cgi-bin/carddisp.pl?gene=GOLPH3
Gpm6b	glycoprotein m6b	AI593561, Gpm, Gpm6, M6B	http://www.genecards.org/cgi-bin/carddisp.pl?gene=GPM6B
Gpr22	G protein-coupled receptor 22	2900068K05Rik, AW061316	http://www.genecards.org/cgi-bin/carddisp.pl?gene=GPR22
Gramd1b	GRAM domain containing 1B	3222402H23, A930008A22Rik, AI593249, mKIAA1201	http://www.genecards.org/cgi-bin/carddisp.pl?gene=GRAMD1B
Grb2	growth factor receptor bound protein 2	AA408164, Ash	http://www.genecards.org/cgi-bin/carddisp.pl?gene=GRB2
Grhl2	grainyhead like transcription factor 2	0610015A08Rik, BO, BOM, Tcfcp2, Tcfcp2l3, clft, clft3	http://www.genecards.org/cgi-bin/carddisp.pl?gene=GRHL2
Grk5	G protein-coupled receptor kinase 5	Gpr, Gprk5	http://www.genecards.org/cgi-bin/carddisp.pl?gene=GRK5
Gstm1	glutathione S-transferase, mu 1	Gstb, Gstb-, Gstb-1, Gstb1	http://www.genecards.org/cgi-bin/carddisp.pl?gene=GSTM1
Gstm5	glutathione S-transferase, mu 5		http://www.genecards.org/cgi-bin/carddisp.pl?gene=GSTM5
Gtpbp2	GTP binding protein 2	nmf20, nmf205	http://www.genecards.org/cgi-bin/carddisp.pl?gene=GTPBP2
Gxylt2	glucoside xylosyltransferase 2	Glt8d, Glt8d4, Gm152	http://www.genecards.org/cgi-bin/carddisp.pl?gene=GXYLT2
H3c2	H3 clustered histone 2	H3-53, H3c13, H3c14, H3c15, H3c3, H3c4, H3c6, H3c7, Hist1h, Hist1h3b	http://www.genecards.org/cgi-bin/carddisp.pl?gene=H3C2
Harbi1	harbinger transposase derived 1	D230010M03Rik	http://www.genecards.org/cgi-bin/carddisp.pl?gene=HARBI1
Hectd1	HECT domain E3 ubiquitin protein ligase 1	A630086P08Rik, AI844876, b2b327C, b2b327Clo, o, opm	http://www.genecards.org/cgi-bin/carddisp.pl?gene=HECTD1
Hectd2	HECT domain E3 ubiquitin protein ligase 2	4921524L07, A630025O09Rik, AW212605	http://www.genecards.org/cgi-bin/carddisp.pl?gene=HECTD2
Hecw2	HECT, C2 and WW domain containing E3 ubiquitin protein ligase 2	A730039N16Rik, D030049F17Rik, Gm971, Ned, Nedl2, mKIAA1301	http://www.genecards.org/cgi-bin/carddisp.pl?gene=HECW2
Helz2	helicase with zinc finger 2, transcriptional coactivator	PDIP1, Pric285, mKIAA1769, mPDIP1	http://www.genecards.org/cgi-bin/carddisp.pl?gene=HELZ2
Hephl1	hephaestin-like 1	Gm509, Z, Zp, cw, thd, zykl, zyklopen	http://www.genecards.org/cgi-bin/carddisp.pl?gene=HEPHL1
Hhat	hedgehog acyltransferase	2810432O22Rik, AI462858, AP-2, AP-2CRE, S, Skn, Tg(TFAP2A-cre)1Will	http://www.genecards.org/cgi-bin/carddisp.pl?gene=HHAT
Hhip	Hedgehog-interacting protein	H, Hhi, Hhip1, Hi	http://www.genecards.org/cgi-bin/carddisp.pl?gene=HHIP
Hid1	HID1 domain containing	C630004H02Rik	http://www.genecards.org/cgi-bin/carddisp.pl?gene=HID1
Hipk2	homeodomain interacting protein kinase 2	1110014O20Rik, B230339E18Rik, St, Stank	http://www.genecards.org/cgi-bin/carddisp.pl?gene=HIPK2
Hmcn1	hemicentin 1	EG545370, FIBL-6, Gm201	http://www.genecards.org/cgi-bin/carddisp.pl?gene=HMCN1
Hpn	hepsin	Hlb32, Hlb320	http://www.genecards.org/cgi-bin/carddisp.pl?gene=HPN
Hs3st3a1	heparan sulfate (glucosamine) 3-O-sulfotransferase 3A1	3Os, 3Ost3a, Hs3st3a	http://www.genecards.org/cgi-bin/carddisp.pl?gene=HS3ST3A1
Hsp90aa1	heat shock protein 90, alpha (cytosolic), class A member 1	86kDa, 89kDa, AL024080, AL024147, Hsp, Hsp86-1, Hsp89, Hsp90, Hspca, hs, hsp4	http://www.genecards.org/cgi-bin/carddisp.pl?gene=HSP90AA1
Htr1a	5-hydroxytryptamine (serotonin) receptor 1A	Gpcr, Gpcr18	http://www.genecards.org/cgi-bin/carddisp.pl?gene=HTR1A
Htr2b	5-hydroxytryptamine (serotonin) receptor 2B	5-HT-2B, 5-HT-2F, 5-HT2B, AJ012488, AV377389	http://www.genecards.org/cgi-bin/carddisp.pl?gene=HTR2B
Ift172	intraflagellar transport 172	4930553F24Rik, Slb, av, avc1, wi, wim	http://www.genecards.org/cgi-bin/carddisp.pl?gene=IFT172
Ift22	intraflagellar transport 22	3110017O03Rik, AI835745, AI847427, Ra, Rabl5	http://www.genecards.org/cgi-bin/carddisp.pl?gene=IFT22
Igsf10	immunoglobulin superfamily, member 10	6530405F15Rik, 9030224D03, AA409708, AA536958, AI414626, Adl, Adlican2, CMF608	http://www.genecards.org/cgi-bin/carddisp.pl?gene=IGSF10
Il17b	interleukin 17B	1110006O16Rik, 1700006N07Rik, Zcyto, Zcyto7	http://www.genecards.org/cgi-bin/carddisp.pl?gene=IL17B
Il17ra	interleukin 17 receptor A	AW538159, Cdw217, Il, Il17r, VDw21, VDw217	http://www.genecards.org/cgi-bin/carddisp.pl?gene=IL17RA
Inpp4a	inositol polyphosphate-4-phosphatase, type I	107kD, 107kDa, 9630012D15, D130048C09Rik, R74740	http://www.genecards.org/cgi-bin/carddisp.pl?gene=INPP4A
Inpp5d	inositol polyphosphate-5-phosphatase D	S, SH, SHI, SHIP, SHIP-1, SHIP1, SIP-145, p150Ship, s-, s-SHIP	http://www.genecards.org/cgi-bin/carddisp.pl?gene=INPP5D
Ints4	integrator complex subunit 4	2610034N24Rik, AA692684, AW493223	http://www.genecards.org/cgi-bin/carddisp.pl?gene=INTS4
Intu	inturned planar cell polarity protein	9230116I04Rik, 9430087H23Rik, Pdzd, Pdzd6, Pdzk, Pdzk6, mKIAA1284	http://www.genecards.org/cgi-bin/carddisp.pl?gene=INTU
Iqank1	IQ motif and ankyrin repeat containing 1	4933407E14Rik, K230010J24Rik	http://www.genecards.org/cgi-bin/carddisp.pl?gene=IQANK1
Iqce	IQ motif containing E	1700028P05Rik, mKIAA1023	http://www.genecards.org/cgi-bin/carddisp.pl?gene=IQCE
Irf2bp1	interferon regulatory factor 2 binding protein 1	6330414O09Rik, C530033F24	http://www.genecards.org/cgi-bin/carddisp.pl?gene=IRF2BP1
Islr	immunoglobulin superfamily containing leucine-rich repeat	AW553146, Meflin	http://www.genecards.org/cgi-bin/carddisp.pl?gene=ISLR
Itga1	integrin alpha 1	CD49, CD49A, E130012M19Rik, V, Vla1	http://www.genecards.org/cgi-bin/carddisp.pl?gene=ITGA1
Itga6	integrin alpha 6	5033401O05Rik, AI115430, Cd49f, VLA-6	http://www.genecards.org/cgi-bin/carddisp.pl?gene=ITGA6
Itgam	integrin alpha M	CD11b/CD18, CR, CR3, CR3A, Cd11b, F730045J24Rik, Ly-4, Ly-40, MAC1, Mac-, Mac-1, Mac-1a	http://www.genecards.org/cgi-bin/carddisp.pl?gene=ITGAM
Itgb1	integrin beta 1 (fibronectin receptor beta)	4633401G24Rik, AA409975, AA960159, CD29, Fn, Fnrb, Gm9863, gpIIa	http://www.genecards.org/cgi-bin/carddisp.pl?gene=ITGB1
Itih3	inter-alpha trypsin inhibitor, heavy chain 3	AW108094, ITI-HC3, In, Intin3, Itih, Itih-3	http://www.genecards.org/cgi-bin/carddisp.pl?gene=ITIH3
Itpr1	inositol 1,4,5-trisphosphate receptor 1	D6Pas2, Gm10429, I, IP, IP3R 1, IP3R1, InsP3R, Ip3r, Itp, Itpr-1, P40, P400, Pc, Pcp, Pcp-1, Pcp1, insP3R1, o, opt, wb, wblo	http://www.genecards.org/cgi-bin/carddisp.pl?gene=ITPR1
Ivns1abp	influenza virus NS1A binding protein	1190004M08Rik, 1700126I16Rik, AA960440, HSPC0, HSPC068, ND, ND1, NS, NS-1, NS1, NS1-BP, Nd1-L, Nd1-S, mKIAA0850	http://www.genecards.org/cgi-bin/carddisp.pl?gene=IVNS1ABP
Jak2	Janus kinase 2	Fd17	http://www.genecards.org/cgi-bin/carddisp.pl?gene=JAK2
Jmjd6	jumonji domain containing 6	5730436I23Rik, D11Ertd195e, PSR, Pt, Ptd, PtdSerR, Ptdsr, mKIAA0585	http://www.genecards.org/cgi-bin/carddisp.pl?gene=JMJD6
Josd2	Josephin domain containing 2	1110007C05Rik	http://www.genecards.org/cgi-bin/carddisp.pl?gene=JOSD2
Kat6a	K(lysine) acetyltransferase 6A	1500036M03, 9930021N24Rik, MO, MOZ, Myst, Myst3, Zfp22, Zfp220	http://www.genecards.org/cgi-bin/carddisp.pl?gene=KAT6A
Katnb1	katanin p80 (WD40-containing) subunit B 1	2410003J24Rik, KA, KAT	http://www.genecards.org/cgi-bin/carddisp.pl?gene=KATNB1
Katnip	katanin interacting protein	D430042O09Rik, Kiaa0556	http://www.genecards.org/cgi-bin/carddisp.pl?gene=KATNIP
Kazn	kazrin, periplakin interacting protein	2310007B04Rik, 9030409G11Rik, AI256607, AI666764, AW061099, Kaz, Kazrin	http://www.genecards.org/cgi-bin/carddisp.pl?gene=KAZN
Kcna1	potassium voltage-gated channel, shaker-related subfamily, member 1	AI840627, Kca1-1, Kv1., Kv1.1, MBK1, Mk-1, Sh, Shak, mcep, mceph	http://www.genecards.org/cgi-bin/carddisp.pl?gene=KCNA1
Kcna3	potassium voltage-gated channel, shaker-related subfamily, member 3	Kca1-, Kca1-3, Kv1., Kv1.3, Mk-3	http://www.genecards.org/cgi-bin/carddisp.pl?gene=KCNA3
Kcnj12	potassium inwardly-rectifying channel, subfamily J, member 12	IR, IRK-2, IRK2, Kir2, Kir2.2, MB-IR, MB-IRK2	http://www.genecards.org/cgi-bin/carddisp.pl?gene=KCNJ12
Kcnj5	potassium inwardly-rectifying channel, subfamily J, member 5	CIR, GIR, GIRK4, KATP-1, Kir3, Kir3.4	http://www.genecards.org/cgi-bin/carddisp.pl?gene=KCNJ5
Kcnma1	potassium large conductance calcium-activated channel, subfamily M, alpha member 1	5730414M22Rik, BKC, BKCA alpha, BKCa, KCa1.1, Max, MaxiK, Slo, Slo1, k(VCA)alpha, mSlo, mSlo1, slo-alpha	http://www.genecards.org/cgi-bin/carddisp.pl?gene=KCNMA1
Kcnq5	potassium voltage-gated channel, subfamily Q, member 5	7730402H11, 9230107O05Rik, AA589396, D1Mgi, D1Mgi1	http://www.genecards.org/cgi-bin/carddisp.pl?gene=KCNQ5
Keap1	kelch-like ECH-associated protein 1	IN, INRF2, mKIAA0132	http://www.genecards.org/cgi-bin/carddisp.pl?gene=KEAP1
Kif21a	kinesin family member 21A		http://www.genecards.org/cgi-bin/carddisp.pl?gene=KIF21A
Kif5b	kinesin family member 5B	AL022807, Khc, Khcs, Kns1, Ukhc	http://www.genecards.org/cgi-bin/carddisp.pl?gene=KIF5B
Kifc3	kinesin family member C3	AI325457, BB123200	http://www.genecards.org/cgi-bin/carddisp.pl?gene=KIFC3
Klf1	Kruppel-like factor 1 (erythroid)	Ekl, Eklf, Nan	http://www.genecards.org/cgi-bin/carddisp.pl?gene=KLF1
Klf15	Kruppel-like factor 15	1810013I09Rik, AV048136, AW494632, CKL, CKLF, KKL, KKLF, hlb44, hlb444	http://www.genecards.org/cgi-bin/carddisp.pl?gene=KLF15
Klhdc10	kelch domain containing 10	2410127E18Rik, AI593221, mKIAA0265	http://www.genecards.org/cgi-bin/carddisp.pl?gene=KLHDC10
Klhl12	kelch-like 12	C3i, C3ip1	http://www.genecards.org/cgi-bin/carddisp.pl?gene=KLHL12
Klhl17	kelch-like 17	AL022703, BC058738, act	http://www.genecards.org/cgi-bin/carddisp.pl?gene=KLHL17
Klhl2	kelch-like 2, Mayven	6030411N21Rik, 8530402H02Rik, ABP-KE, ABP-KELCH, AU020744, M, Mav	http://www.genecards.org/cgi-bin/carddisp.pl?gene=KLHL2
Klhl20	kelch-like 20	AI504637, D930050H05Rik, Kleip, mKIAA4210	http://www.genecards.org/cgi-bin/carddisp.pl?gene=KLHL20
Klhl38	kelch-like 38	8230402K04Rik	http://www.genecards.org/cgi-bin/carddisp.pl?gene=KLHL38
Kmt2c	lysine (K)-specific methyltransferase 2C	E330008K23Rik, H, HALR, Ml, Mll3	http://www.genecards.org/cgi-bin/carddisp.pl?gene=KMT2C
Ksr2	kinase suppressor of ras 2		http://www.genecards.org/cgi-bin/carddisp.pl?gene=KSR2
L3mbtl4	L3MBTL4 histone methyl-lysine binding protein	A730037L19Rik, D930040M24Rik	http://www.genecards.org/cgi-bin/carddisp.pl?gene=L3MBTL4
Lap3	leucine aminopeptidase 3	2410015L10Rik, AA410100, LAP-3, Lap, Lapep, Pe, Pep, Pep-7, Pep-S, Pep7, Peps	http://www.genecards.org/cgi-bin/carddisp.pl?gene=LAP3
Laptm4a	lysosomal-associated protein transmembrane 4A	AA286466, LAPTM4, MTP, Mt, Mtrp, mKIAA0108	http://www.genecards.org/cgi-bin/carddisp.pl?gene=LAPTM4A
Large1	LARGE xylosyl- and glucuronyltransferase 1	BPFD#3, BPFD#36, Gyltl1a, Large, Mbp-1, Mbp1, e, enr, fg, frog, froggy, myd	http://www.genecards.org/cgi-bin/carddisp.pl?gene=LARGE1
Larp6	La ribonucleoprotein domain family, member 6	5430431G03Rik, AI552438, Ac, Achn, ach	http://www.genecards.org/cgi-bin/carddisp.pl?gene=LARP6
Lca5	Leber congenital amaurosis 5 (human)	4930431B11Rik, 5730406O13Rik, AV274874, ORF64	http://www.genecards.org/cgi-bin/carddisp.pl?gene=LCA5
Lgr5	leucine rich repeat containing G protein coupled receptor 5	FEX, Gpr, Gpr49	http://www.genecards.org/cgi-bin/carddisp.pl?gene=LGR5
Limk1	LIM-domain containing, protein kinase	KIZ-1, LIMK-1, Limk	http://www.genecards.org/cgi-bin/carddisp.pl?gene=LIMK1
Lingo2	leucine rich repeat and Ig domain containing 2	B230217C06Rik, LE, Lern3, Lr, Lrrn6c	http://www.genecards.org/cgi-bin/carddisp.pl?gene=LINGO2
Lipe	lipase, hormone sensitive	4933403G17Rik, H, HSL, REH	http://www.genecards.org/cgi-bin/carddisp.pl?gene=LIPE
Llgl1	LLGL1 scribble cell polarity complex component	AI325176, Lg, Lgl1, Llglh, Mgl1	http://www.genecards.org/cgi-bin/carddisp.pl?gene=LLGL1
Lmf2	lipase maturation factor 2	AI451006, Tmem112b, Tmem153	http://www.genecards.org/cgi-bin/carddisp.pl?gene=LMF2
Lrp1	low density lipoprotein receptor-related protein 1	A2, A2mr, AI316852, CD91, Lrp, b2b1554C, b2b1554Clo	http://www.genecards.org/cgi-bin/carddisp.pl?gene=LRP1
Lrp10	low-density lipoprotein receptor-related protein 10	L, Lrp9	http://www.genecards.org/cgi-bin/carddisp.pl?gene=LRP10
Lrp11	low density lipoprotein receptor-related protein 11	1700034J19Rik, 6330533B21, 9830160H19Rik	http://www.genecards.org/cgi-bin/carddisp.pl?gene=LRP11
Lrp2	low density lipoprotein receptor-related protein 2	AI315343, AW536255, D230004K18Rik, Gp33, Gp330, Meg, Megalin, b2b1625.2Clo	http://www.genecards.org/cgi-bin/carddisp.pl?gene=LRP2
Lrrc15	leucine rich repeat containing 15	5430427N11Rik, LIB	http://www.genecards.org/cgi-bin/carddisp.pl?gene=LRRC15
Lrrc3	leucine rich repeat containing 3	1300011L04Rik, C21orf102	http://www.genecards.org/cgi-bin/carddisp.pl?gene=LRRC3
Lrrc43	leucine rich repeat containing 43	Gm1061	http://www.genecards.org/cgi-bin/carddisp.pl?gene=LRRC43
Lrrc61	leucine rich repeat containing 61	BC027309	http://www.genecards.org/cgi-bin/carddisp.pl?gene=LRRC61
Lrrfip2	leucine rich repeat (in FLII) interacting protein 2	5133400F20Rik, AI850587	http://www.genecards.org/cgi-bin/carddisp.pl?gene=LRRFIP2
Lrsam1	leucine rich repeat and sterile alpha motif containing 1		http://www.genecards.org/cgi-bin/carddisp.pl?gene=LRSAM1
Lta4h	leukotriene A4 hydrolase		http://www.genecards.org/cgi-bin/carddisp.pl?gene=LTA4H
Ltbp4	latent transforming growth factor beta binding protein 4	2310046A13Rik	http://www.genecards.org/cgi-bin/carddisp.pl?gene=LTBP4
Lysmd1	LysM, putative peptidoglycan-binding, domain containing 1	2610022K04Rik, AI415311	http://www.genecards.org/cgi-bin/carddisp.pl?gene=LYSMD1
Manba	mannosidase, beta A, lysosomal	2410030O07Rik, B930014J03Rik, Bm, Bmn	http://www.genecards.org/cgi-bin/carddisp.pl?gene=MANBA
Map1lc3a	microtubule-associated protein 1 light chain 3 alpha	1010001H21Rik, 4922501H04Rik, LC, LC3, LC3a	http://www.genecards.org/cgi-bin/carddisp.pl?gene=MAP1LC3A
Map3k20	mitogen-activated protein kinase kinase kinase 20	AV006891, B230120H23Rik, HCCS-4, MLTK, MLTKalpha, MLTKbe, MLTKbeta, Za, Zak	http://www.genecards.org/cgi-bin/carddisp.pl?gene=MAP3K20
Map3k7	mitogen-activated protein kinase kinase kinase 7	B430101B05, C87327, Tak, Tak1	http://www.genecards.org/cgi-bin/carddisp.pl?gene=MAP3K7
Map3k9	mitogen-activated protein kinase kinase kinase 9	E130314H24Rik, Mlk, Mlk1, Prke1	http://www.genecards.org/cgi-bin/carddisp.pl?gene=MAP3K9
Map7	microtubule-associated protein 7	E-MAP-1, E-MAP-115, MAP-7, Mta, Mtap7, R75000, ms, mshi, mst, mste, st, ste	http://www.genecards.org/cgi-bin/carddisp.pl?gene=MAP7
Mapk10	mitogen-activated protein kinase 10	C230008H04Rik, JNK, JNK3, JNK3B1, JNK3B2, SAPK(beta), Ser, Serk2, p493F1, p493F12, p54bSAPK	http://www.genecards.org/cgi-bin/carddisp.pl?gene=MAPK10
Mark3	MAP/microtubule affinity regulating kinase 3	1600015G02Rik, A430080F22Rik, C-TAK, C-TAK1, ETK-1, ETK1, Emk2, MPK10	http://www.genecards.org/cgi-bin/carddisp.pl?gene=MARK3
Mast4	microtubule associated serine/threonine kinase family member 4	4930420O11Rik, AI642422, mKIAA0303	http://www.genecards.org/cgi-bin/carddisp.pl?gene=MAST4
Matn1	matrilin 1, cartilage matrix protein	CM, CMP, Crt, Crtm, Mat, Mat1, matr, matrilin-1	http://www.genecards.org/cgi-bin/carddisp.pl?gene=MATN1
Matn4	matrilin 4	matr, matrilin-4	http://www.genecards.org/cgi-bin/carddisp.pl?gene=MATN4
Mbtps1	membrane-bound transcription factor peptidase, site 1	0610038M03Rik, AV003995, S, S1P, SKI, SKI-1, Ski1, mKIAA0091	http://www.genecards.org/cgi-bin/carddisp.pl?gene=MBTPS1
Mccc2	methylcrotonoyl-Coenzyme A carboxylase 2 (beta)	4930552N12Rik, MCCB	http://www.genecards.org/cgi-bin/carddisp.pl?gene=MCCC2
Mdga1	MAM domain containing glycosylphosphatidylinositol anchor 1	1200011I03Rik, GPIM, Mamdc, Mamdc3	http://www.genecards.org/cgi-bin/carddisp.pl?gene=MDGA1
Med1	mediator complex subunit 1	AI480703, CRSP, CRSP210, DRIP, DRIP205, P, PBP, Pparbp, TRAP, TRAP220, TRIP-2, l11Jus, l11Jus15	http://www.genecards.org/cgi-bin/carddisp.pl?gene=MED1
Med12	mediator complex subunit 12	230kDa, M, Mopa, OP, OPA-1, Tnrc, Tnrc11, Trap, Trap230	http://www.genecards.org/cgi-bin/carddisp.pl?gene=MED12
Med13	mediator complex subunit 13	1110067M05Rik, D030023K18, Thr, Thrap1, Trap, Trap240	http://www.genecards.org/cgi-bin/carddisp.pl?gene=MED13
Med31	mediator complex subunit 31	3110004H13Rik, CGI-125, l11Jus, l11Jus15	http://www.genecards.org/cgi-bin/carddisp.pl?gene=MED31
Mef2d	myocyte enhancer factor 2D	C80750	http://www.genecards.org/cgi-bin/carddisp.pl?gene=MEF2D
Met	met proto-oncogene	AI838057, HGF, HGFR, P, Par4, c-Met	http://www.genecards.org/cgi-bin/carddisp.pl?gene=MET
Metap2	methionine aminopeptidase 2	4930584B20Rik, A930035J23Rik, AI047573, AL024412, AU014659, Amp2, Mnpep, p6, p67, p67eIF2	http://www.genecards.org/cgi-bin/carddisp.pl?gene=METAP2
Mfap4	microfibrillar-associated protein 4	1110007F23Rik	http://www.genecards.org/cgi-bin/carddisp.pl?gene=MFAP4
Mfge8	milk fat globule EGF and factor V/VIII domain containing	AA408458, AI325141, MFG-E8, MP47, Mfgm, P47, SED, SED1, lacta, lactadherin	http://www.genecards.org/cgi-bin/carddisp.pl?gene=MFGE8
Mgat4a	mannoside acetylglucosaminyltransferase 4, isoenzyme A	9530018I07Rik, GnT, GnT-IVa, glcNAc-T-IVa	http://www.genecards.org/cgi-bin/carddisp.pl?gene=MGAT4A
Mgat4b	mannoside acetylglucosaminyltransferase 4, isoenzyme B	AA407995, GnTIVb	http://www.genecards.org/cgi-bin/carddisp.pl?gene=MGAT4B
Mib2	mindbomb E3 ubiquitin protein ligase 2	2210008I11Rik, Zzan, Zzank1, skd	http://www.genecards.org/cgi-bin/carddisp.pl?gene=MIB2
Micu1	mitochondrial calcium uptake 1	C730016L05Rik, Calc, Cba, Cbara1	http://www.genecards.org/cgi-bin/carddisp.pl?gene=MICU1
Mid1	midline 1	61B3-, 61B3-R, DXHXS114, DXHXS1141, Fxy, Trim, Trim18	http://www.genecards.org/cgi-bin/carddisp.pl?gene=MID1
Mier1	MEIR1 treanscription regulator	4933425I22Rik, 5830411K19Rik, er1	http://www.genecards.org/cgi-bin/carddisp.pl?gene=MIER1
Mknk1	MAP kinase-interacting serine/threonine kinase 1	2410048M24Rik, Mnk, Mnk1	http://www.genecards.org/cgi-bin/carddisp.pl?gene=MKNK1
Mmachc	methylmalonic aciduria cblC type, with homocystinuria	1810037K07Rik, CblC	http://www.genecards.org/cgi-bin/carddisp.pl?gene=MMACHC
Mmp25	matrix metallopeptidase 25	F730048C11Rik, Leuk, Leukolysin, MMP20, MT6-MM, MT6-MMP	http://www.genecards.org/cgi-bin/carddisp.pl?gene=MMP25
Mob4	MOB family member 4, phocein	2610109B12Rik, Mobk, Mobkl3, Phocn, Pr, Prei3	http://www.genecards.org/cgi-bin/carddisp.pl?gene=MOB4
Mon1a	MON1 homolog A, secretory traffciking associated	2810468K17Rik	http://www.genecards.org/cgi-bin/carddisp.pl?gene=MON1A
Mov10	Mov10 RISC complex RNA helicase	C77703, Mov-, Mov-10	http://www.genecards.org/cgi-bin/carddisp.pl?gene=MOV10
Mphosph8	M-phase phosphoprotein 8	1500035L22Rik, 4930548G07Rik, AU040635	http://www.genecards.org/cgi-bin/carddisp.pl?gene=MPHOSPH8
Mpp5	membrane protein, palmitoylated 5 (MAGUK p55 subfamily member 5)	3830420B02Rik, AI255216, AI644496, P, Pals1	http://www.genecards.org/cgi-bin/carddisp.pl?gene=PALS1
Mpped2	metallophosphoesterase domain containing 2	239Fb, 2700082O15Rik, AV354767, AW060960	http://www.genecards.org/cgi-bin/carddisp.pl?gene=MPPED2
Mrc1	mannose receptor, C type 1	AW259686, CD206, M, MR	http://www.genecards.org/cgi-bin/carddisp.pl?gene=MRC1
Mtf1	metal response element binding transcription factor 1	MTF-1, Thy, Thyls	http://www.genecards.org/cgi-bin/carddisp.pl?gene=MTF1
Mtmr9	myotubularin related protein 9	9430075G12Rik, AA516943, AF073881, LIP-, LIP-STYX, MTMR, MTMR8, mMTMH3	http://www.genecards.org/cgi-bin/carddisp.pl?gene=MTMR9
Mtnr1a	melatonin receptor 1A	MR, Me, MelR	http://www.genecards.org/cgi-bin/carddisp.pl?gene=MTNR1A
Mtus2	microtubule associated tumor suppressor candidate 2	5730592G18Rik, A730013O20Rik, AU067634, C130038G02Rik, Cazip, Gm763, mKIAA0774	http://www.genecards.org/cgi-bin/carddisp.pl?gene=MTUS2
Mug1	murinoglobulin 1
Mul1	mitochondrial ubiquitin ligase activator of NFKB 1	0610009K11Rik, AV000801, Gide	http://www.genecards.org/cgi-bin/carddisp.pl?gene=MUL1
Mxd1	MAX dimerization protein 1	AW122478, Ma, Mad, Mad1	http://www.genecards.org/cgi-bin/carddisp.pl?gene=MXD1
Myl2	myosin, light polypeptide 2, regulatory, cardiac, slow	Gm32672, MLC-, MLC-2, MLC-2s/v, MLC-2v, Mlc, Mlc2v, Myl, Mylpc	http://www.genecards.org/cgi-bin/carddisp.pl?gene=MYL2
Myo1b	myosin IB	AA406997, MIH-L, MMIa	http://www.genecards.org/cgi-bin/carddisp.pl?gene=MYO1B
Myo5a	myosin VA	9630007J19Rik, AI413174, AI661011, Db, Dbv, M, MVa, My, Myo, Myo5, MyoVA, Sev-1, d, d-120J, f, flail, flr	http://www.genecards.org/cgi-bin/carddisp.pl?gene=MYO5A
Myo6	myosin VI	BC029719, Myo6<, Myo6<rsv>, Tl, Tlc, rsv, sv	http://www.genecards.org/cgi-bin/carddisp.pl?gene=MYO6
Myrf	myelin regulatory factor	6030439E18, Gm1804, Gm98, Mrf	http://www.genecards.org/cgi-bin/carddisp.pl?gene=MYRF
Myrip	myosin VIIA and Rab interacting protein	A230081N12Rik, Slac, Slac2-c, Slac2c	http://www.genecards.org/cgi-bin/carddisp.pl?gene=MYRIP
Mysm1	myb-like, SWIRM and MPN domains 1	C130067A03Rik, C530050H10Rik	http://www.genecards.org/cgi-bin/carddisp.pl?gene=MYSM1
N4bp1	NEDD4 binding protein 1	AI481586, C81621	http://www.genecards.org/cgi-bin/carddisp.pl?gene=N4BP1
Nadk2	NAD kinase 2, mitochondrial	MNA, MNADK, Nadk, Nadkd1	http://www.genecards.org/cgi-bin/carddisp.pl?gene=NADK2
Nav3	neuron navigator 3	4732483H20Rik, 9630020C08Rik, POM, POMFIL1, Pomfil1p, mKIAA0938, unc53H, unc53H3	http://www.genecards.org/cgi-bin/carddisp.pl?gene=NAV3
Nbeal2	neurobeachin-like 2	1110014F23Rik, BC042396, mKIAA0540	http://www.genecards.org/cgi-bin/carddisp.pl?gene=NBEAL2
Nbr1	NBR1, autophagy cargo receptor	mKIAA0049	http://www.genecards.org/cgi-bin/carddisp.pl?gene=NBR1
Ndst3	N-deacetylase/N-sulfotransferase (heparan glucosaminyl) 3	4921531K01Rik, 4930511P15Rik, N-HSST 3, NDST-3	http://www.genecards.org/cgi-bin/carddisp.pl?gene=NDST3
Necap1	NECAP endocytosis associated 1	1200016B17Rik, AI747569	http://www.genecards.org/cgi-bin/carddisp.pl?gene=NECAP1
Nectin3	nectin cell adhesion molecule 3	2610301B19Rik, 3000002N23Rik, 4921513D19Rik, AA407785, AU016832, AW538082, CD113, P, Pvrl3, necti	http://www.genecards.org/cgi-bin/carddisp.pl?gene=NECTIN3
Nedd4	neural precursor cell expressed, developmentally down-regulated 4	AA959633, AL023035, AU019897, E430025J12Rik, EG639396, Gm7265, KIAA0093, Nedd, Nedd4-, Nedd4-1, Nedd4a	http://www.genecards.org/cgi-bin/carddisp.pl?gene=NEDD4
Nek11	NIMA (never in mitosis gene a)-related expressed kinase 11	4932416N14Rik	http://www.genecards.org/cgi-bin/carddisp.pl?gene=NEK11
Nek8	NIMA (never in mitosis gene a)-related expressed kinase 8	4632401F23Rik, b2b1449C, b2b1449Clo, jck	http://www.genecards.org/cgi-bin/carddisp.pl?gene=NEK8
Nelfcd	negative elongation factor complex member C/D, Th1l	2410003I03Rik, C77797, Th1, Th1l	http://www.genecards.org/cgi-bin/carddisp.pl?gene=NELFCD
Neurl2	neuralized E3 ubiquitin protein ligase 2	Neur2, Oz, Ozz, Ozz-E, Ozz-E3	http://www.genecards.org/cgi-bin/carddisp.pl?gene=NEURL2
Nfe2l2	nuclear factor, erythroid derived 2, like 2	Nr, Nrf2	http://www.genecards.org/cgi-bin/carddisp.pl?gene=NFE2L2
Nfkb1	nuclear factor of kappa light polypeptide gene enhancer in B cells 1, p105	NF-KB1, NF-k, NF-kappaB, NF-kappaB1, p105, p5, p50, p50/p1, p50/p105	http://www.genecards.org/cgi-bin/carddisp.pl?gene=NFKB1
Nfkbie	nuclear factor of kappa light polypeptide gene enhancer in B cells inhibitor, epsilon	I-kappa-B-epsilon, IKBE, IkB-E, NF-kappa-BIE, ikB-epsilon	http://www.genecards.org/cgi-bin/carddisp.pl?gene=NFKBIE
Ngef	neuronal guanine nucleotide exchange factor	Tim, Tims2, ephe, ephexin	http://www.genecards.org/cgi-bin/carddisp.pl?gene=NGEF
Nid2	nidogen 2	AW547149, Ly111, NID-2, entact, entactin-2, nidogen-2	http://www.genecards.org/cgi-bin/carddisp.pl?gene=NID2
Nim1k	NIM1 serine/threonine protein kinase	E130304F04Rik, Ni, Nim1	http://www.genecards.org/cgi-bin/carddisp.pl?gene=NIM1K
Nipa2	non imprinted in Prader-Willi/Angelman syndrome 2 homolog (human)	2600017P10Rik, 3830408P04Rik, AB041581	http://www.genecards.org/cgi-bin/carddisp.pl?gene=NIPA2
Nkx2-1	NK2 homeobox 1	AV026640, Nkx2.1, T/EB, T/EBP, Titf, Titf1, Ttf-1, ti	http://www.genecards.org/cgi-bin/carddisp.pl?gene=NKX2-1
Nlgn3	neuroligin 3	A230085M13Rik, HN, HNL3, N, NL, NL3, NLG3	http://www.genecards.org/cgi-bin/carddisp.pl?gene=NLGN3
Nlrp3	NLR family, pyrin domain containing 3	AGTAVPRL, AII/AVP, Ci, Cias1, FCAS, FCU, MWS, Mmig, Mmig1, N, NALP3, Pyp, Pypaf1, cry	http://www.genecards.org/cgi-bin/carddisp.pl?gene=NLRP3
Nlrp9b	NLR family, pyrin domain containing 9B	Na, Nalp, Nalp-delta, Nalp9b, Nlrp9	http://www.genecards.org/cgi-bin/carddisp.pl?gene=NLRP9
Nos1ap	nitric oxide synthase 1 (neuronal) adaptor protein	6330408P19Rik, Capon	http://www.genecards.org/cgi-bin/carddisp.pl?gene=NOS1AP
Nostrin	nitric oxide synthase trafficker	Daip2, mDa, mDaIP2	http://www.genecards.org/cgi-bin/carddisp.pl?gene=NOSTRIN
Notch2	notch 2	AI853703, N, N2	http://www.genecards.org/cgi-bin/carddisp.pl?gene=NOTCH2
Notch4	notch 4	In, Int, Int-3, Int3, N, N4	http://www.genecards.org/cgi-bin/carddisp.pl?gene=NOTCH4
Npr1	natriuretic peptide receptor 1	AI893888, GC-, GC-A, N, NPR-A, NPRA, Pndr	http://www.genecards.org/cgi-bin/carddisp.pl?gene=NPR1
Nptx1	neuronal pentraxin 1	D11Bwg1004e, N, Np1	http://www.genecards.org/cgi-bin/carddisp.pl?gene=NPTX1
Nrm	nurim (nuclear envelope membrane protein)	2610307M02Rik, AI429796	http://www.genecards.org/cgi-bin/carddisp.pl?gene=NRM
Nrsn1	neurensin 1	Neure, Neurensin-1, Neuro, Neuro-p24, V, Vmp	http://www.genecards.org/cgi-bin/carddisp.pl?gene=NRSN1
Nsf	N-ethylmaleimide sensitive fusion protein	AI316878, AU020090, AU067812, SKD, SKD2	http://www.genecards.org/cgi-bin/carddisp.pl?gene=NSF
Ntm	neurotrimin	6230410L23Rik, B230210G24Rik, Hn, Hnt, Igdcc2, R75390	http://www.genecards.org/cgi-bin/carddisp.pl?gene=NTM
Nudcd3	NudC domain containing 3	AI427847, BC024322, mKIAA1068	http://www.genecards.org/cgi-bin/carddisp.pl?gene=NUDCD3
Numb	NUMB endocytic adaptor protein	Nb, m-num	http://www.genecards.org/cgi-bin/carddisp.pl?gene=NUMB
Nxf1	nuclear RNA export factor 1	Mex67, Mvb, Mvb1, T, Tap	http://www.genecards.org/cgi-bin/carddisp.pl?gene=NXF1
Oaf	out at first homolog	AL024221, D130038B21Rik, D9Ucl, D9Ucla1	http://www.genecards.org/cgi-bin/carddisp.pl?gene=OAF
Oplah	5-oxoprolinase (ATP-hydrolysing)	1700010G02Rik, 5-OPase	http://www.genecards.org/cgi-bin/carddisp.pl?gene=OPLAH
Opn1mw	opsin 1 (cone pigments), medium-wave-sensitive (color blindness, deutan)	Gc, Gcp, ML, ML-opsin, Op, Opn1lw, Rsvp	http://www.genecards.org/cgi-bin/carddisp.pl?gene=OPN1MW
Oprd1	opioid receptor, delta 1	D, DOR, DOR-1, N, Nbor, mD, mDOR	http://www.genecards.org/cgi-bin/carddisp.pl?gene=OPRD1
Oprk1	opioid receptor, kappa 1	K-OR-1, KOR, KOR-1, MSL-1, Op, Oprk2, R2, R21	http://www.genecards.org/cgi-bin/carddisp.pl?gene=OPRK1
Osbpl1a	oxysterol binding protein-like 1A	G430090F17Rik, Gm753, ORP-1, Osbpl1b	http://www.genecards.org/cgi-bin/carddisp.pl?gene=OSBPL1A
Osbpl6	oxysterol binding protein-like 6	1110062M20Rik, AI596402, OR, ORP-6, mKIAA4128	http://www.genecards.org/cgi-bin/carddisp.pl?gene=OSBPL6
Ostf1	osteoclast stimulating factor 1	C78236, SH3, SH3P2, Sh3d, Sh3d3	http://www.genecards.org/cgi-bin/carddisp.pl?gene=OSTF1
Otog	otogelin	4932420K09, Ot, Otgn, twt	http://www.genecards.org/cgi-bin/carddisp.pl?gene=OTOG
Pah	phenylalanine hydroxylase	AW106920	http://www.genecards.org/cgi-bin/carddisp.pl?gene=PAH
Pak5	p21 (RAC1) activated kinase 5	2900083L08Rik, PAK-5, PAK-7, Pa, Pak7	http://www.genecards.org/cgi-bin/carddisp.pl?gene=PAK5
Pam	peptidylglycine alpha-amidating monooxygenase	PH, PHM	http://www.genecards.org/cgi-bin/carddisp.pl?gene=PAM
Papola	poly (A) polymerase alpha	Pap, PapIII, Plap	http://www.genecards.org/cgi-bin/carddisp.pl?gene=PAPOLA
Pard3	par-3 family cell polarity regulator	AA960621, AI256638, Asip, D8Ertd580, D8Ertd580e, P, PA, Par-3, Par3, Pard-3, Pard3a, Phip	http://www.genecards.org/cgi-bin/carddisp.pl?gene=PARD3
Parp4	poly (ADP-ribose) polymerase family, member 4	ARTD4, Adp, Adprtl1, C030027K23Rik, E230037B21Rik, Gm743, PARP-4, PARPL, PH, PH5P, VAU, VAULT3, VPARP, p19, p193	http://www.genecards.org/cgi-bin/carddisp.pl?gene=PARP4
Pax6	paired box 6	1500038E17Rik, AEY1, AEY11, Dey, Gsfaey, Gsfaey11, Pax, Pax-6, Sey	http://www.genecards.org/cgi-bin/carddisp.pl?gene=PAX6
Pcmtd1	protein-L-isoaspartate (D-aspartate) O-methyltransferase domain containing 1	8430411F12Rik, A030012M09Rik	http://www.genecards.org/cgi-bin/carddisp.pl?gene=PCMTD1
Pcnx4	pecanex homolog 4	1810048J11Rik, 4932413O10, AU017192, Pcn, Pcnxl4	http://www.genecards.org/cgi-bin/carddisp.pl?gene=PCNX4
Pcsk1	proprotein convertase subtilisin/kexin type 1	Nec, Nec-, Nec-1, Nec1, PC, PC1, PC3, Php, Phpp-1, SP, SPC3	http://www.genecards.org/cgi-bin/carddisp.pl?gene=PCSK1
Pcsk2	proprotein convertase subtilisin/kexin type 2	6330411F23Rik, AI839700, Nec, Nec-, Nec-2, Nec2, PC, PC2, Php, Phpp-2, SP, SPC2	http://www.genecards.org/cgi-bin/carddisp.pl?gene=PCSK2
Pdcd10	programmed cell death 10	2410003B13Rik, Ccm3, Tfa1, Tfa15, Tfar15	http://www.genecards.org/cgi-bin/carddisp.pl?gene=PDCD10
Pde4d	phosphodiesterase 4D, cAMP specific	9630011N22Rik, Dpde, Dpde3, dunc	http://www.genecards.org/cgi-bin/carddisp.pl?gene=PDE4D
Pde6d	phosphodiesterase 6D, cGMP-specific, rod, delta	AI841218, PrBP/delta	http://www.genecards.org/cgi-bin/carddisp.pl?gene=PDE6D
Pdgfra	platelet derived growth factor receptor, alpha polypeptide	AI115593, CD140, CD140a, Pdgfr, Pdgfr-2	http://www.genecards.org/cgi-bin/carddisp.pl?gene=PDGFRA
Peli1	pellino 1	2810468L03Rik, A930031K15Rik, AA409794, AI586297, D11Ertd676, D11Ertd676e	http://www.genecards.org/cgi-bin/carddisp.pl?gene=PELI1
Pfkp	phosphofructokinase, platelet	1200015H23Rik, 9330125N24Rik, ATP-PFK, PFK-, PFK-C, PFK-P	http://www.genecards.org/cgi-bin/carddisp.pl?gene=PFKP
Pgbd5	piggyBac transposable element derived 5	2900019M05Rik, AI854313	http://www.genecards.org/cgi-bin/carddisp.pl?gene=PGBD5
Phf12	PHD finger protein 12	2410142K10Rik, F630045O13, PF, PF1, mKIAA1523	http://www.genecards.org/cgi-bin/carddisp.pl?gene=PHF12
Phrf1	PHD and ring finger domains 1	AA673488	http://www.genecards.org/cgi-bin/carddisp.pl?gene=PHRF1
Pi16	peptidase inhibitor 16	1200009H11Rik, Cripi, PI-16	http://www.genecards.org/cgi-bin/carddisp.pl?gene=PI16
Pi4k2a	phosphatidylinositol 4-kinase type 2 alpha	Pi4k2	http://www.genecards.org/cgi-bin/carddisp.pl?gene=PI4K2A
Picalm	phosphatidylinositol binding clathrin assembly protein	CALM, CLTH, PAP180, fit, fit-, fit-1, fit1, mKIAA4114	http://www.genecards.org/cgi-bin/carddisp.pl?gene=PICALM
Pick1	protein interacting with C kinase 1	Prk, Prkcabp	http://www.genecards.org/cgi-bin/carddisp.pl?gene=PICK1
Pign	phosphatidylinositol glycan anchor biosynthesis, class N	Gm20308, PIG-N	http://www.genecards.org/cgi-bin/carddisp.pl?gene=PIGN
Pik3cb	phosphatidylinositol-4,5-bisphosphate 3-kinase catalytic subunit beta	1110001J02Rik, AI447572, p110be, p110beta	http://www.genecards.org/cgi-bin/carddisp.pl?gene=PIK3CB
Pik3r4	phosphoinositide-3-kinase regulatory subunit 4	2210010O15Rik, C730038E05Rik, C85833, D9Ertd418e, Vp, Vps15, p15, p150	http://www.genecards.org/cgi-bin/carddisp.pl?gene=PIK3R4
Pim1	proviral integration site 1	Pim, Pim-1	http://www.genecards.org/cgi-bin/carddisp.pl?gene=PIM1
Pip5k1a	phosphatidylinositol-4-phosphate 5-kinase, type 1 alpha	PI4P5K-I[a], PIP5K1-alpha, PIP5KIalpha, Pi, Pipk5a	http://www.genecards.org/cgi-bin/carddisp.pl?gene=PIP5K1A
Pitpnc1	phosphatidylinositol transfer protein, cytoplasmic 1	1110020B03Rik, 5830436L09Rik, AI662802, AI851387, C330017I21Rik, Dnr411, RDGB-BE, RDGBB, RDGBB1, mrdgBbeta, rdgB-beta	http://www.genecards.org/cgi-bin/carddisp.pl?gene=PITPNC1
Pitpnm1	phosphatidylinositol transfer protein, membrane-associated 1	DRE, DRES9, Mpt-1, Nir-2, PITPnm 1, Pitpnm, R75447, Rd9, Rdg, RdgB, RdgB1	http://www.genecards.org/cgi-bin/carddisp.pl?gene=PITPNM1
Pkd2	polycystin 2, transient receptor potential cation channel	C030034P18Rik, PC, PC2, TR, TRPP2	http://www.genecards.org/cgi-bin/carddisp.pl?gene=PKD2
Pla2g4a	phospholipase A2, group IVA (cytosolic, calcium-dependent)	Pla, Pla2g4, cP, cPL, cPLA2, cPLA2-alpha, cPLA2alpha	http://www.genecards.org/cgi-bin/carddisp.pl?gene=PLA2G4A
Pla2g6	phospholipase A2, group VI	BB112799, PNPLA9, i, iPLA, iPLA(2)beta, iPLA2, iPLA2beta	http://www.genecards.org/cgi-bin/carddisp.pl?gene=PLA2G6
Plcb3	phospholipase C, beta 3	mKIAA4098	http://www.genecards.org/cgi-bin/carddisp.pl?gene=PLCB3
Plcg1	phospholipase C, gamma 1	AI894140, Cded, Plc, Plc-1, Plc-ga, Plc-gamma1, Plcg, Plcg-1	http://www.genecards.org/cgi-bin/carddisp.pl?gene=PLCG1
Plch1	phospholipase C, eta 1	BC042549, PLC-eta-1, PLCe, PLCeta1, Pl, Plcl3	http://www.genecards.org/cgi-bin/carddisp.pl?gene=PLCH1
Plec	plectin	AA591047, AU042537, EBS1, PCN, PLTN, Ple, Plec1	http://www.genecards.org/cgi-bin/carddisp.pl?gene=PLEC
Plekha8	pleckstrin homology domain containing, family A (phosphoinositide binding specific) member 8	6330400G01, AA517676, BC052360, FA, Fapp-2, Fapp2	http://www.genecards.org/cgi-bin/carddisp.pl?gene=PLEKHA8
Plekhd1	pleckstrin homology domain containing, family D (with coiled-coil domains) member 1	3830431G21Rik	http://www.genecards.org/cgi-bin/carddisp.pl?gene=PLEKHD1
Plekhg3	pleckstrin homology domain containing, family G (with RhoGef domain) member 3	BC030417	http://www.genecards.org/cgi-bin/carddisp.pl?gene=PLEKHG3
Plekhh1	pleckstrin homology domain containing, family H (with MyTH4 domain) member 1	AV308913, C77772, D630024D12Rik, mKIAA1200	http://www.genecards.org/cgi-bin/carddisp.pl?gene=PLEKHH1
Plekhm1	pleckstrin homology domain containing, family M (with RUN domain) member 1	AP1, AP162, B2, BC038943, D330036J23Rik	http://www.genecards.org/cgi-bin/carddisp.pl?gene=PLEKHM1
Plekhm3	pleckstrin homology domain containing, family M, member 3	9430067K14Rik, A230102O09Rik, AI449570, DAPR, Plekh, Plekhm1l	http://www.genecards.org/cgi-bin/carddisp.pl?gene=PLEKHM3
Plg	plasminogen	AI649309, P, Pg	http://www.genecards.org/cgi-bin/carddisp.pl?gene=PLG
Plpp3	phospholipid phosphatase 3	1110003O22Rik, 2610002D05Rik, AV025606, D4Bwg0538e, D4Bwg1535e, L, Lpp3, PRG, PRG-2, Pp, Ppab2b, Ppap2b	http://www.genecards.org/cgi-bin/carddisp.pl?gene=PLPP3
Plxnb2	plexin B2	Debt, plexin-B2	http://www.genecards.org/cgi-bin/carddisp.pl?gene=PLXNB2
Poglut1	protein O-glucosyltransferase 1	9630046K23Rik, Clp46, Ktelc, Ktelc1, Ru, Rumi, w, wsnp	http://www.genecards.org/cgi-bin/carddisp.pl?gene=POGLUT1
Pol	pol protein
Ppie	peptidylprolyl isomerase E (cyclophilin E)	2010010D16Rik, Cyp33	http://www.genecards.org/cgi-bin/carddisp.pl?gene=PPIE
Ppp1ca	protein phosphatase 1 catalytic subunit alpha	Pp, Ppp1c, dis, dism2	http://www.genecards.org/cgi-bin/carddisp.pl?gene=PPP1CA
Ppp1r10	protein phosphatase 1, regulatory subunit 10	2610025H06Rik, Cat53, D17Ertd808, D17Ertd808e, Fb19, PN, Pnuts	http://www.genecards.org/cgi-bin/carddisp.pl?gene=PPP1R10
Ppp1r13b	protein phosphatase 1, regulatory subunit 13B	A, AI449786, ASPP1, AW545810, Tp53bp2, Trp53bp2, p85	http://www.genecards.org/cgi-bin/carddisp.pl?gene=PPP1R13B
Ppp2r5c	protein phosphatase 2, regulatory subunit B', gamma	2610043M05Rik, 2700063L20Rik, AI060890, AW545884, C85228, D12Bwg0916e	http://www.genecards.org/cgi-bin/carddisp.pl?gene=PPP2R5C
Ppp3ca	protein phosphatase 3, catalytic subunit, alpha isoform	2900074D19Rik, C, CN, Caln, Calna, CnA	http://www.genecards.org/cgi-bin/carddisp.pl?gene=PPP3CA
Ppp3r1	protein phosphatase 3, regulatory subunit B, alpha isoform (calcineurin B, type I)	CaN, CaNB1, Cnb, Cnb1, MCIP1	http://www.genecards.org/cgi-bin/carddisp.pl?gene=PPP3R1
Ppp4c	protein phosphatase 4, catalytic subunit	1110002D08Rik, AU016079, P, PP-X, PP4C, Ppx, pp4	http://www.genecards.org/cgi-bin/carddisp.pl?gene=PPP4C
Ppp4r1	protein phosphatase 4, regulatory subunit 1	3110001J10Rik, Pp, Pp4r1	http://www.genecards.org/cgi-bin/carddisp.pl?gene=PPP4R1
Ppp4r3a	protein phosphatase 4 regulatory subunit 3A	1110034C04Rik, BC064465, Smek, Smek1, mKIAA2010	http://www.genecards.org/cgi-bin/carddisp.pl?gene=PPP4R3A
Prkaa2	protein kinase, AMP-activated, alpha 2 catalytic subunit	2310008I11Rik, A830082D05, AMPK, AMPKalpha2	http://www.genecards.org/cgi-bin/carddisp.pl?gene=PRKAA2
Prkab1	protein kinase, AMP-activated, beta 1 non-catalytic subunit	1300015D22Rik, AU021155, E430008F22	http://www.genecards.org/cgi-bin/carddisp.pl?gene=PRKAB1
Prkar1b	protein kinase, cAMP dependent regulatory, type I beta	AI385716, RIb, RIbeta	http://www.genecards.org/cgi-bin/carddisp.pl?gene=PRKAR1B
Prkca	protein kinase C, alpha	AI875142, Pk, Pkca	http://www.genecards.org/cgi-bin/carddisp.pl?gene=PRKCA
Prkcd	protein kinase C, delta	AI385711, D14Ertd420, D14Ertd420e, PKC[d, PKC[d], PKCde, PKCdelta, Pkc, Pkcd	http://www.genecards.org/cgi-bin/carddisp.pl?gene=PRKCD
Prox1	prospero homeobox 1	A230003G05Rik, PROX-1	http://www.genecards.org/cgi-bin/carddisp.pl?gene=PROX1
Prpf18	pre-mRNA processing factor 18	2810441A10Rik	http://www.genecards.org/cgi-bin/carddisp.pl?gene=PRPF18
Prss30	protease, serine 30	2010015P21Rik, D, Di, Disp, Disp1, Tmp, Tmprss8
Prss33	protease, serine 33	E, Eos, mT6, trypta, tryptase-6	http://www.genecards.org/cgi-bin/carddisp.pl?gene=PRSS33
Psd3	pleckstrin and Sec7 domain containing 3	4931420C21Rik, AI661273, BC003498, D430018P08, EFA6, EFA6D	http://www.genecards.org/cgi-bin/carddisp.pl?gene=PSD3
Ptchd3	patched domain containing 3	4930451E13Rik, 4933440L20Rik, RNDEu-3	http://www.genecards.org/cgi-bin/carddisp.pl?gene=PTCHD3
Pten	phosphatase and tensin homolog	2310035O07Rik, A130070J02Rik, AI463227, B430203M17Rik, MMAC, MMAC1, PTENbeta, TEP, TEP1	http://www.genecards.org/cgi-bin/carddisp.pl?gene=PTEN
Pth1r	parathyroid hormone 1 receptor	PPR, PTH, Pthr, Pthr1	http://www.genecards.org/cgi-bin/carddisp.pl?gene=PTH1R
Ptpn13	protein tyrosine phosphatase, non-receptor type 13	AI324989, P, PT, PTP, PTP-BL, PTPL1, Ptpri, RIP	http://www.genecards.org/cgi-bin/carddisp.pl?gene=PTPN13
Ptpn23	protein tyrosine phosphatase, non-receptor type 23	AI462446, PTP-TD, PTP-TD14	http://www.genecards.org/cgi-bin/carddisp.pl?gene=PTPN23
Ptpn4	protein tyrosine phosphatase, non-receptor type 4	PTPM, PTPMEG, Ptn4, TE, TEP, TEP/mPTP, TEP/mPTPMEG, hPTP-M, hPTP-MEG	http://www.genecards.org/cgi-bin/carddisp.pl?gene=PTPN4
Ptprb	protein tyrosine phosphatase, receptor type, B	3230402H02Rik, C130094E24, Ptpz, Rptpb, VE-, VE-PTP, Veptp	http://www.genecards.org/cgi-bin/carddisp.pl?gene=PTPRB
Ptprn	protein tyrosine phosphatase, receptor type, N	IA, IA-2, mIA-A, mKIAA4064	http://www.genecards.org/cgi-bin/carddisp.pl?gene=PTPRN
Pus3	pseudouridine synthase 3	2610020J05Rik, 5730412F04Rik	http://www.genecards.org/cgi-bin/carddisp.pl?gene=PUS3
Rab11b	RAB11B, member RAS oncogene family	A730055L17Rik	http://www.genecards.org/cgi-bin/carddisp.pl?gene=RAB11B
Rab11fip4	RAB11 family interacting protein 4 (class II)	A730072L08Rik, RAB11-, RAB11-FIP4, mKIAA1821	http://www.genecards.org/cgi-bin/carddisp.pl?gene=RAB11FIP4
Rab23	RAB23, member RAS oncogene family	AW545388, opb, opb2	http://www.genecards.org/cgi-bin/carddisp.pl?gene=RAB23
Rab2a	RAB2A, member RAS oncogene family	9330148M11Rik, C80220, Ra, Rab2	http://www.genecards.org/cgi-bin/carddisp.pl?gene=RAB2A
Rab43	RAB43, member RAS oncogene family	1810048P08Rik, 2500004H21Rik, AW490415	http://www.genecards.org/cgi-bin/carddisp.pl?gene=RAB43
Rab5b	RAB5B, member RAS oncogene family	C030027M18Rik	http://www.genecards.org/cgi-bin/carddisp.pl?gene=RAB5B
Rab6a	RAB6A, member RAS oncogene family	2610028L11Rik, AA419671, Ra, Rab6	http://www.genecards.org/cgi-bin/carddisp.pl?gene=RAB6A
Rad54l2	RAD54 like 2 (S. cerevisiae)	A, Arip4, D130058C05, G630026H09Rik, Sr, Srisnf2l	http://www.genecards.org/cgi-bin/carddisp.pl?gene=RAD54L2
Ralgps2	Ral GEF with PH domain and SH3 binding motif 2	1810020P17Rik, 2210408F11Rik, 4921528G01Rik, 9130014M22Rik, AU043409, AW046161	http://www.genecards.org/cgi-bin/carddisp.pl?gene=RALGPS2
Rapgef4	Rap guanine nucleotide exchange factor (GEF) 4	1300003D15Rik, 5730402K07Rik, 6330581N18Rik, EPAC 2, Epa, Epac-2, Epac2, cAMP-G, mKIAA4040	http://www.genecards.org/cgi-bin/carddisp.pl?gene=RAPGEF4
Rarb	retinoic acid receptor, beta	A830025K23, H, Hap, Nr1b2	http://www.genecards.org/cgi-bin/carddisp.pl?gene=RARB
Rasd1	RAS, dexamethasone-induced 1	Dexr, Dexras1	http://www.genecards.org/cgi-bin/carddisp.pl?gene=RASD1
Rasgef1c	RasGEF domain family, member 1C	9130006A14Rik	http://www.genecards.org/cgi-bin/carddisp.pl?gene=RASGEF1C
Rasgrf2	RAS protein-specific guanine nucleotide-releasing factor 2	6330417G04Rik, AW048350, Grf, Grf2, Ras-GRF2	http://www.genecards.org/cgi-bin/carddisp.pl?gene=RASGRF2
Rasl11b	RAS-like, family 11, member B	1190017B18Rik	http://www.genecards.org/cgi-bin/carddisp.pl?gene=RASL11B
Rb1cc1	RB1-inducible coiled-coil 1	2900055E04Rik, 5930404L04Rik, Cc1, FIP200, Fip2, LaXp, LaXp180	http://www.genecards.org/cgi-bin/carddisp.pl?gene=RB1CC1
Recql	RecQ protein-like	RecQ, RecQ1	http://www.genecards.org/cgi-bin/carddisp.pl?gene=RECQL
Recql4	RecQ protein-like 4	RecQ4	http://www.genecards.org/cgi-bin/carddisp.pl?gene=RECQL4
Reep1	receptor accessory protein 1	D6Ertd253, D6Ertd253e	http://www.genecards.org/cgi-bin/carddisp.pl?gene=REEP1
Rela	v-rel reticuloendotheliosis viral oncogene homolog A (avian)	p6, p65, p65 NF-kappa B, p65 NFkB	http://www.genecards.org/cgi-bin/carddisp.pl?gene=RELA
Reln	reelin	reeler, rl	http://www.genecards.org/cgi-bin/carddisp.pl?gene=RELN
Retreg3	reticulophagy regulator family member 3	1300010M03Rik, 4933404C01Rik, AI551748, Fam134, Fam134c	http://www.genecards.org/cgi-bin/carddisp.pl?gene=RETREG3
Rft1	RFT1 homolog	D930025H04	http://www.genecards.org/cgi-bin/carddisp.pl?gene=RFT1
Rgs17	regulator of G-protein signaling 17	6430507P11Rik, RGS, Rgsz2	http://www.genecards.org/cgi-bin/carddisp.pl?gene=RGS17
Rgs8	regulator of G-protein signaling 8	6530413N01Rik	http://www.genecards.org/cgi-bin/carddisp.pl?gene=RGS8
Rhbdf1	rhomboid 5 homolog 1	C16ORF8, Di, Dis, Dist, Dist1, Egfr, Egfr-rs, mKIAA4242	http://www.genecards.org/cgi-bin/carddisp.pl?gene=RHBDF1
Rhbdl2	rhomboid like 2	9130416B15, RRP2	http://www.genecards.org/cgi-bin/carddisp.pl?gene=RHBDL2
Rhoa	ras homolog family member A	A, Ar, Arha, Arha1, Arha2, R	http://www.genecards.org/cgi-bin/carddisp.pl?gene=RHOA
Rhobtb1	Rho-related BTB domain containing 1	1700008H16Rik, 3110048G13Rik, AI173445, AI573858, AV350930	http://www.genecards.org/cgi-bin/carddisp.pl?gene=RHOBTB1
Rhou	ras homolog family member U	2310026M05Rik, AI182090, Ar, Arhu, CDC42L, CDC42L1, G28K, WRCH, WRCH-, WRCH-1, WRCH1, mG28K	http://www.genecards.org/cgi-bin/carddisp.pl?gene=RHOU
Rims2	regulating synaptic membrane exocytosis 2	2810036I15Rik, AW048769, RI, RIM2, Rab3ip2, Rim2(+40A), Rim2(+44A), Rim2(+4A), Serg2, Syt3, Syt3-rs, mKIAA0751	http://www.genecards.org/cgi-bin/carddisp.pl?gene=RIMS2
Rin2	Ras and Rab interactor 2	2010003K16Rik, 4632403N06Rik, AW821980, RA, RASSF4	http://www.genecards.org/cgi-bin/carddisp.pl?gene=RIN2
Ripk1	receptor (TNFRSF)-interacting serine-threonine kinase 1	D330015H01Rik, R, RIP, RIP-1, Rinp, Rip1	http://www.genecards.org/cgi-bin/carddisp.pl?gene=RIPK1
Rnf123	ring finger protein 123	BC003945, KPC, Kpc1	http://www.genecards.org/cgi-bin/carddisp.pl?gene=RNF123
Rnf13	ring finger protein 13	2010001H16Rik, Rz, Rzf	http://www.genecards.org/cgi-bin/carddisp.pl?gene=RNF13
Rnf213	ring finger protein 213	6030403J01, D11Ertd759, D11Ertd759e, mysterin	http://www.genecards.org/cgi-bin/carddisp.pl?gene=RNF213
Rnf34	ring finger protein 34	AW061037, AW536122, BC004042, C88279, RIFF	http://www.genecards.org/cgi-bin/carddisp.pl?gene=RNF34
Rp2	retinitis pigmentosa 2 homolog	AI662636, Rp, Rp2h	http://www.genecards.org/cgi-bin/carddisp.pl?gene=RP2
Rpe	ribulose-5-phosphate-3-epimerase	2810429B02Rik, 5730518J08Rik	http://www.genecards.org/cgi-bin/carddisp.pl?gene=RPE
Rpgr	retinitis pigmentosa GTPase regulator	Rd, Rd9, Rp, Rp3h	http://www.genecards.org/cgi-bin/carddisp.pl?gene=RPGR
Rpgrip1l	Rpgrip1-like	1700047E16Rik, 4931437C01, Ftm, Np, Nphp8, fan	http://www.genecards.org/cgi-bin/carddisp.pl?gene=RPGRIP1L
Rps6kb2	ribosomal protein S6 kinase, polypeptide 2	S6K, S6K-beta-2, S6K2	http://www.genecards.org/cgi-bin/carddisp.pl?gene=RPS6KB2
Rspry1	ring finger and SPRY domain containing 1	4930470D19Rik, AI608258	http://www.genecards.org/cgi-bin/carddisp.pl?gene=RSPRY1
Rufy1	RUN and FYVE domain containing 1	3000002E04Rik, Ra, Rabip4, ZFYVE1, ZFYVE12	http://www.genecards.org/cgi-bin/carddisp.pl?gene=RUFY1
Rundc1	RUN domain containing 1	AW125546, D930024B17	http://www.genecards.org/cgi-bin/carddisp.pl?gene=RUNDC1
Rxfp3	relaxin family peptide receptor 3	BC053073, GPCR135, Rl, Rln3r1, Salpr	http://www.genecards.org/cgi-bin/carddisp.pl?gene=RXFP3
Sacm1l	SAC1 suppressor of actin mutations 1-like (yeast)	SA, SAC1, Sac1p, mKIAA0851	http://www.genecards.org/cgi-bin/carddisp.pl?gene=SACM1L
Samd8	sterile alpha motif domain containing 8	1110053F04Rik, 1700010P07Rik, S, SMSr	http://www.genecards.org/cgi-bin/carddisp.pl?gene=SAMD8
Samd9l	sterile alpha motif domain containing 9-like	AA175286, ESTM2, ESTM25, mKIAA2005	http://www.genecards.org/cgi-bin/carddisp.pl?gene=SAMD9L
Samhd1	SAM domain and HD domain, 1	E330031J07Rik, Mg11, mSAMHD1	http://www.genecards.org/cgi-bin/carddisp.pl?gene=SAMHD1
Sarm1	sterile alpha and HEAT/Armadillo motif containing 1	A830091I15Rik, C78606, MyD885, Sarm	http://www.genecards.org/cgi-bin/carddisp.pl?gene=SARM1
Saysd1	SAYSVFN motif domain containing 1	1810063B07Rik, 4930488P03Rik	http://www.genecards.org/cgi-bin/carddisp.pl?gene=SAYSD1
Sbf2	SET binding factor 2	4833411B01Rik, AA414977, AI317167, B430219L04Rik, Mtmr1, Mtmr13, SBF, mMTMH1	http://www.genecards.org/cgi-bin/carddisp.pl?gene=SBF2
Sbno1	strawberry notch 1	9330180L10Rik, AI849128, AW557836, BC021875, Sbno, mSno1, sno	http://www.genecards.org/cgi-bin/carddisp.pl?gene=SBNO1
Scn8a	sodium channel, voltage-gated, type VIII, alpha	AI853486, C630029C19Rik, NMF33, NaC, NaCh6, Nav, Nav1.6, dmu, med, mnd, mnd-, mnd-2, mnd2, nmf, nmf2, nmf335, nmf5, nmf58, nur, nur14, s, seal	http://www.genecards.org/cgi-bin/carddisp.pl?gene=SCN8A
Scrib	scribbled planar cell polarity	AI118201, CRIB, Cr, Crc, SCRIB1, Scr, Scrb1, mKIAA0147, vartul	http://www.genecards.org/cgi-bin/carddisp.pl?gene=SCRIB
Sec31a	Sec31 homolog A (S. cerevisiae)	1810024J13Rik, ABP125, ABP130, AU042160, HSPC275, Sec31, Sec31l1	http://www.genecards.org/cgi-bin/carddisp.pl?gene=SEC31A
Sel1l	sel-1 suppressor of lin-12-like (C. elegans)	AW493766, Sel, Sel1h, mKIAA4137	http://www.genecards.org/cgi-bin/carddisp.pl?gene=SEL1L
Sele	selectin, endothelial cell	CD62E, E-sele, E-selectin, ELAM-1, El, Elam, LECAM2	http://www.genecards.org/cgi-bin/carddisp.pl?gene=SELE
Sema6a	sema domain, transmembrane domain (TM), and cytoplasmic domain, (semaphorin) 6A	A730020P05Rik, AI851735, Sem, Sema6, Sema6A-1, Semaq, VIa, b2b997C, se	http://www.genecards.org/cgi-bin/carddisp.pl?gene=SEMA6A
Septin7	septin 7	Cdc10, E430034N22, Sep, Sept7	http://www.genecards.org/cgi-bin/carddisp.pl?gene=SEPTIN7
Serinc5	serine incorporator 5	A130038L21Rik, AI, AIGP3, C86123, D12Mgi1, TP, TPO1	http://www.genecards.org/cgi-bin/carddisp.pl?gene=SERINC5
Serpini1	serine (or cysteine) peptidase inhibitor, clade I, member 1	AI837402, Neu, Ns, PI, PI-12, PI12, Sp, Spi17	http://www.genecards.org/cgi-bin/carddisp.pl?gene=SERPINI1
Set	SET nuclear oncogene	2610030F17Rik, 5730420M11Rik, AA407739, I-2PP2A, StF-IT, StF-IT-1, TAF-I	http://www.genecards.org/cgi-bin/carddisp.pl?gene=SET
Setd1a	SET domain containing 1A	BC010250, KMT2F, Nsccn1, mKIAA0339, mNSC1	http://www.genecards.org/cgi-bin/carddisp.pl?gene=SETD1A
Sgk3	serum/glucocorticoid regulated kinase 3	2510015P22Rik, A330005P07Rik, Ci, Cisk, fy, fz	http://www.genecards.org/cgi-bin/carddisp.pl?gene=SGK3
Sgsm3	small G protein signaling modulator 3	1810012I01Rik, AI428557, BB175482, CIP, Cip85, R75178, RUSC3, Rutbc, Rutbc3	http://www.genecards.org/cgi-bin/carddisp.pl?gene=SGSM3
Sh2b2	SH2B adaptor protein 2	Aps	http://www.genecards.org/cgi-bin/carddisp.pl?gene=SH2B2
Sh3bgrl3	SH3 domain binding glutamic acid-rich protein-like 3	1110004L05Rik, AU022188	http://www.genecards.org/cgi-bin/carddisp.pl?gene=SH3BGRL3
Sh3bp2	SH3-domain binding protein 2	3BP, 3BP2	http://www.genecards.org/cgi-bin/carddisp.pl?gene=SH3BP2
Sh3kbp1	SH3-domain kinase binding protein 1	1200007H22Rik, 1700125L08Rik, 5830464D22Rik, AI447724, Cin85, IN, IN85, Ru, Ruk, Se, Seta	http://www.genecards.org/cgi-bin/carddisp.pl?gene=SH3KBP1
Sh3rf3	SH3 domain containing ring finger 3	4831416G18Rik, Igfbp5-ip, Sh3md, Sh3md4, Sh3rf31	http://www.genecards.org/cgi-bin/carddisp.pl?gene=SH3RF3
Shc1	src homology 2 domain-containing transforming protein C1	Sh, Shc, ShcA, p6, p66, p66s, p66shc	http://www.genecards.org/cgi-bin/carddisp.pl?gene=SHC1
Shf	Src homology 2 domain containing F		http://www.genecards.org/cgi-bin/carddisp.pl?gene=SHF
Shoc2	Shoc2, leucine rich repeat scaffold protein	AU017287, Sur, Sur8, mKIAA0862	http://www.genecards.org/cgi-bin/carddisp.pl?gene=SHOC2
Siah1a	siah E3 ubiquitin protein ligase 1A	AA982064, AI853500, Si, Sinh1a	http://www.genecards.org/cgi-bin/carddisp.pl?gene=SIAH1
Skap2	src family associated phosphoprotein 2	2610021A10Rik, AA960083, BB137539, RA, RA70, SKAP, SKAP-HOM, Saps, Scap2, mSKA, mSKAP55R	http://www.genecards.org/cgi-bin/carddisp.pl?gene=SKAP2
Ski	ski sarcoma viral oncogene homolog (avian)	2310012I02Rik, 2610001A11Rik, AA062172, AA589460, BC004088	http://www.genecards.org/cgi-bin/carddisp.pl?gene=SKI
Slc10a3	solute carrier family 10 (sodium/bile acid cotransporter family), member 3	DXHXS253, DXHXS253E, DXS253E, DXS253Eh, DXSmhG2, DXSmhG28, P, P3	http://www.genecards.org/cgi-bin/carddisp.pl?gene=SLC10A3
Slc12a2	solute carrier family 12, member 2	9330166H04R, 9330166H04Rik, Nkcc, Nkcc1, mBSC, mBSC2, sy, sy-ns	http://www.genecards.org/cgi-bin/carddisp.pl?gene=SLC12A2
Slc13a3	solute carrier family 13 (sodium-dependent dicarboxylate transporter), member 3	NaD, NaDC, NaDC-3, NaDC3, SDCT, SDCT2	http://www.genecards.org/cgi-bin/carddisp.pl?gene=SLC13A3
Slc13a5	solute carrier family 13 (sodium-dependent citrate transporter), member 5	In, Indy, Na, NaC2/, NaC2/NaCT, Nact, mIN, mINDY	http://www.genecards.org/cgi-bin/carddisp.pl?gene=SLC13A5
Slc15a1	solute carrier family 15 (oligopeptide transporter), member 1	D630032F02, PECT, PECT1, PEP, PEPT1	http://www.genecards.org/cgi-bin/carddisp.pl?gene=SLC15A1
Slc16a4	solute carrier family 16 (monocarboxylic acid transporters), member 4	AW146050, MCT 5	http://www.genecards.org/cgi-bin/carddisp.pl?gene=SLC16A4
Slc17a5	solute carrier family 17 (anion/sugar transporter), member 5	4631416G20Rik, 4732491M05, AST, ISSD, NSD, SD, SIALIN, SIASD, SLD	http://www.genecards.org/cgi-bin/carddisp.pl?gene=SLC17A5
Slc17a6	solute carrier family 17 (sodium-dependent inorganic phosphate cotransporter), member 6	2900073D12Rik, DNPI, VGLU, VGLUT2	http://www.genecards.org/cgi-bin/carddisp.pl?gene=SLC17A6
Slc1a1	solute carrier family 1 (neuronal/epithelial high affinity glutamate transporter, system Xag), member 1	D130048G10Rik, EAA, EAAC1, EAAC2, EAAT3, MEAA, MEAAC1	http://www.genecards.org/cgi-bin/carddisp.pl?gene=SLC1A1
Slc1a2	solute carrier family 1 (glial high affinity glutamate transporter), member 2	1700091C19Rik, 2900019G14Rik, AI159670, Eaa, Eaat2, GLT, GLT-, GLT-1, GLT1, MGLT, MGLT1	http://www.genecards.org/cgi-bin/carddisp.pl?gene=SLC1A2
Slc22a20	solute carrier family 22 (organic anion transporter), member 20	Gm963, OAT1-L, mOA, mOAT6
Slc22a21	solute carrier family 22 (organic cation transporter), member 21	Oct, Octn3, Slc2, Slc22a9
Slc23a1	solute carrier family 23 (nucleobase transporters), member 1	D18Ucl, D18Ucla2, SVC, SVCT1, Slc2, Slc23a2, YS, YSPL3	http://www.genecards.org/cgi-bin/carddisp.pl?gene=SLC23A1
Slc25a44	solute carrier family 25, member 44	6720482A19, B430110G05Rik	http://www.genecards.org/cgi-bin/carddisp.pl?gene=SLC25A44
Slc26a5	solute carrier family 26, member 5	P, Pres, pr, prestin	http://www.genecards.org/cgi-bin/carddisp.pl?gene=SLC26A5
Slc28a3	solute carrier family 28 (sodium-coupled nucleoside transporter), member 3	Cnt, Cnt3	http://www.genecards.org/cgi-bin/carddisp.pl?gene=SLC28A3
Slc2a13	solute carrier family 2 (facilitated glucose transporter), member 13	6530403A04, A630029G22Rik, AI505012, Gm308	http://www.genecards.org/cgi-bin/carddisp.pl?gene=SLC2A13
Slc2a5	solute carrier family 2 (facilitated glucose transporter), member 5	AI526984, GLUT, Glut5, Slc5a	http://www.genecards.org/cgi-bin/carddisp.pl?gene=SLC2A5
Slc30a2	solute carrier family 30 (zinc transporter), member 2	ZnT-2, Znt, Znt2	http://www.genecards.org/cgi-bin/carddisp.pl?gene=SLC30A2
Slc30a7	solute carrier family 30 (zinc transporter), member 7	1810059J10Rik, 2610034N15Rik, 4833428C12Rik, AI467242, ZnT, ZnT-, ZnT-7, ZnT7, Zntl2	http://www.genecards.org/cgi-bin/carddisp.pl?gene=SLC30A7
Slc31a1	solute carrier family 31, member 1	4930445G01Rik, AI787263, AU016967, Ctr, Ctr1	http://www.genecards.org/cgi-bin/carddisp.pl?gene=SLC31A1
Slc35a2	solute carrier family 35 (UDP-galactose transporter), member A2	AI327289, Had, Had-, Had-1, Had1, Sfc, Sfc8, UGT, Uga, Ugalt	http://www.genecards.org/cgi-bin/carddisp.pl?gene=SLC35A2
Slc35a3	solute carrier family 35 (UDP-N-acetylglucosamine (UDP-GlcNAc) transporter), member 3	2310050P13Rik	http://www.genecards.org/cgi-bin/carddisp.pl?gene=SLC35A3
Slc35b4	solute carrier family 35, member B4	4930474D06Rik, AB041549, AW494345	http://www.genecards.org/cgi-bin/carddisp.pl?gene=SLC35B4
Slc35e3	solute carrier family 35, member E3	9330166G04Rik, AI481200	http://www.genecards.org/cgi-bin/carddisp.pl?gene=SLC35E3
Slc35g1	solute carrier family 35, member G1	AA590464, D330039I19Rik, Tmem20	http://www.genecards.org/cgi-bin/carddisp.pl?gene=SLC35G1
Slc36a2	solute carrier family 36 (proton/amino acid symporter), member 2	A530067G19Rik, PA, PAT2, Tram, Tramd1	http://www.genecards.org/cgi-bin/carddisp.pl?gene=SLC36A2
Slc38a10	solute carrier family 38, member 10	1810073N04Rik	http://www.genecards.org/cgi-bin/carddisp.pl?gene=SLC38A10
Slc38a4	solute carrier family 38, member 4	1110012E16Rik, 1700012A18Rik, At, Ata3, SN, SNAT4, mATA3, mNAT3	http://www.genecards.org/cgi-bin/carddisp.pl?gene=SLC38A4
Slc38a7	solute carrier family 38, member 7	D430050E18	http://www.genecards.org/cgi-bin/carddisp.pl?gene=SLC38A7
Slc39a13	solute carrier family 39 (metal ion transporter), member 13	1100001L14Rik, AA387663, ZIP, ZIP-13, ZIP13	http://www.genecards.org/cgi-bin/carddisp.pl?gene=SLC39A13
Slc44a2	solute carrier family 44, member 2	1110028E10Rik, CTL, CTL2	http://www.genecards.org/cgi-bin/carddisp.pl?gene=SLC44A2
Slc45a4	solute carrier family 45, member 4	9330175B01Rik, AW552276	http://www.genecards.org/cgi-bin/carddisp.pl?gene=SLC45A4
Slc4a10	solute carrier family 4, sodium bicarbonate cotransporter-like, member 10	NCB, NCBE, mKIAA4136	http://www.genecards.org/cgi-bin/carddisp.pl?gene=SLC4A10
Slc50a1	solute carrier family 50 (sugar transporter), member 1	MmSWEET1, R, Rag, Rag1ap1, Rga	http://www.genecards.org/cgi-bin/carddisp.pl?gene=SLC50A1
Slc5a11	solute carrier family 5 (sodium/glucose cotransporter), member 11	2010013B02Rik, Kst, Kst1, RKST2, SMIT2, Slc5a10	http://www.genecards.org/cgi-bin/carddisp.pl?gene=SLC5A11
Slc5a12	solute carrier family 5 (sodium/glucose cotransporter), member 12	AI315119, D630015G19, SMCT, SMCT2	http://www.genecards.org/cgi-bin/carddisp.pl?gene=SLC5A12
Slc6a13	solute carrier family 6 (neurotransmitter transporter, GABA), member 13	GAT3, Gabt, Gabt3, Gat, Gat2	http://www.genecards.org/cgi-bin/carddisp.pl?gene=SLC6A13
Slc6a15	solute carrier family 6 (neurotransmitter transporter), member 15	AA536730, AI326450, AI326451, v7-, v7-3	http://www.genecards.org/cgi-bin/carddisp.pl?gene=SLC6A15
Slc7a6os	solute carrier family 7, member 6 opposite strand	2010007L18Rik, 2400002F02Rik	http://www.genecards.org/cgi-bin/carddisp.pl?gene=SLC7A6OS
Slc7a7	solute carrier family 7 (cationic amino acid transporter, y+ system), member 7	AI790233, my+la, my+lat1	http://www.genecards.org/cgi-bin/carddisp.pl?gene=SLC7A7
Slc7a8	solute carrier family 7 (cationic amino acid transporter, y+ system), member 8	AA408822, LA, LAT2	http://www.genecards.org/cgi-bin/carddisp.pl?gene=SLC7A8
Slc7a9	solute carrier family 7 (cationic amino acid transporter, y+ system), member 9	CSN, CSNU3	http://www.genecards.org/cgi-bin/carddisp.pl?gene=SLC7A9
Slc9a8	solute carrier family 9 (sodium/hydrogen exchanger), member 8	1200006P13Rik, 6430709P13Rik, AI182282, NHE, NHE-8, NHE8	http://www.genecards.org/cgi-bin/carddisp.pl?gene=SLC9A8
Slc9a9	solute carrier family 9 (sodium/hydrogen exchanger), member 9	5730527A11Rik, 9930105B05, AI854429, Nhe, Nhe9	http://www.genecards.org/cgi-bin/carddisp.pl?gene=SLC9A9
Smap1	small ArfGAP 1	1700056O10Rik, 4921514B13Rik, 4921525H11Rik, AI462175	http://www.genecards.org/cgi-bin/carddisp.pl?gene=SMAP1
Smarca1	SWI/SNF related, matrix associated, actin dependent regulator of chromatin, subfamily a, member 1	5730494M04Rik, Sn, Snf2l	http://www.genecards.org/cgi-bin/carddisp.pl?gene=SMARCA1
Smarca2	SWI/SNF related, matrix associated, actin dependent regulator of chromatin, subfamily a, member 2	2610209L14Rik, SNF2alpha, Snf, Snf2l2, br, brahma, brm	http://www.genecards.org/cgi-bin/carddisp.pl?gene=SMARCA2
Smarca4	SWI/SNF related, matrix associated, actin dependent regulator of chromatin, subfamily a, member 4	BAF190A, Brg, Brg1, HP1-BP72, SNF2b, SNF2beta, SW1/, SW1/SNF, b2b508.1C, b2b508.1Clo, b2b692C, b2b692Clo	http://www.genecards.org/cgi-bin/carddisp.pl?gene=SMARCA4
Smc5	structural maintenance of chromosomes 5	MLZ-453, SMC-5, Smc5l1, mKIAA0594, mSMC5	http://www.genecards.org/cgi-bin/carddisp.pl?gene=SMC5
Smg1	SMG1 homolog, phosphatidylinositol 3-kinase-related kinase (C. elegans)	2610207I05Rik, 5430435M13Rik, C130002K18Rik, mKIAA0421	http://www.genecards.org/cgi-bin/carddisp.pl?gene=SMG1
Smg7	Smg-7 homolog, nonsense mediated mRNA decay factor (C. elegans)	9430023P16Rik, mKIAA0250	http://www.genecards.org/cgi-bin/carddisp.pl?gene=SMG7
Snrnp35	small nuclear ribonucleoprotein 35 (U11/U12)	6330548G22Rik	http://www.genecards.org/cgi-bin/carddisp.pl?gene=SNRNP35
Sntb1	syntrophin, basic 1		http://www.genecards.org/cgi-bin/carddisp.pl?gene=SNTB1
Snx13	sorting nexin 13	RGS-, Rgs-px1, mKIAA0713	http://www.genecards.org/cgi-bin/carddisp.pl?gene=SNX13
Snx27	sorting nexin family member 27	5730552M22Rik, D13Mgi2, ESTM4, ESTM45, ESTM47, R75405	http://www.genecards.org/cgi-bin/carddisp.pl?gene=SNX27
Snx3	sorting nexin 3	SD, SDP3	http://www.genecards.org/cgi-bin/carddisp.pl?gene=SNX3
Sorl1	sortilin-related receptor, LDLR class A repeats-containing	2900010L19Rik, AI596264, AW261561, LR, LR11, SorLA, gp250, m, mSorLA	http://www.genecards.org/cgi-bin/carddisp.pl?gene=SORL1
Sos1	SOS Ras/Rac guanine nucleotide exchange factor 1	4430401P03Rik, 9630010N06, AI449023	http://www.genecards.org/cgi-bin/carddisp.pl?gene=SOS1
Spg21	SPG21, maspardin	ACP, ACP33, BM-019, C78576, D9Wsu18, D9Wsu18e, GL01, GL010, MAST	http://www.genecards.org/cgi-bin/carddisp.pl?gene=SPG21
Spryd7	SPRY domain containing 7	6330409N04Rik, Clld6	http://www.genecards.org/cgi-bin/carddisp.pl?gene=SPRYD7
Sptbn1	spectrin beta, non-erythrocytic 1	9930031C03Rik, AL033301, SPTB2, Sp, Spn, Spnb-2, Spnb2, elf, elf1, elf3, mKIAA4049	http://www.genecards.org/cgi-bin/carddisp.pl?gene=SPTBN1
Sqstm1	sequestosome 1	A17, A170, OSF, OSF-6, Osi, S, STAP, STONE14, p6, p62	http://www.genecards.org/cgi-bin/carddisp.pl?gene=SQSTM1
Srgap1	SLIT-ROBO Rho GTPase activating protein 1	4930572H05Rik, Arhg, Arhgap13	http://www.genecards.org/cgi-bin/carddisp.pl?gene=SRGAP1
Srpk2	serine/arginine-rich protein specific kinase 2	AW226533, AW492537, AW547358, WBP, Wbp6, mSR, mSRPK2	http://www.genecards.org/cgi-bin/carddisp.pl?gene=SRPK2
Srrt	serrate RNA effector molecule homolog (Arabidopsis)	2810019G02Rik, A, ASR2A, ASR2B, ASR2C, ASR2D, Ars2, Asr2	http://www.genecards.org/cgi-bin/carddisp.pl?gene=SRRT
Sstr2	somatostatin receptor 2	SRIF-1, SS2R, SST, SSTR-2, Sms, Smst, Smstr-2, Smstr2, ss, sst2	http://www.genecards.org/cgi-bin/carddisp.pl?gene=SSTR2
St14	suppression of tumorigenicity 14 (colon carcinoma)	Epi, Epithin, MT-S, MT-SP1, Pr, Prss14, Tmpr, Tmprss14, mCAP3, matr, matriptase	http://www.genecards.org/cgi-bin/carddisp.pl?gene=ST14
Stam	signal transducing adaptor molecule (SH3 domain and ITAM motif) 1	STA, STAM1	http://www.genecards.org/cgi-bin/carddisp.pl?gene=STAM
Stat5b	signal transducer and activator of transcription 5B		http://www.genecards.org/cgi-bin/carddisp.pl?gene=STAT5B
Stip1	stress-induced phosphoprotein 1	H, Hop, ST, Sti1, p6, p60	http://www.genecards.org/cgi-bin/carddisp.pl?gene=STIP1
Stk10	serine/threonine kinase 10	Gek1, L, Lok, mKIAA4026	http://www.genecards.org/cgi-bin/carddisp.pl?gene=STK10
Stk11	serine/threonine kinase 11	AA408040, Lkb, Lkb1, Pa, Par-4, R75140	http://www.genecards.org/cgi-bin/carddisp.pl?gene=STK11
Stk25	serine/threonine kinase 25 (yeast)	1500019J11Rik, AU018434, C86992, SOK, Ste20-l, Ste20-like, Ysk, Ysk1	http://www.genecards.org/cgi-bin/carddisp.pl?gene=STK25
Stk3	serine/threonine kinase 3	0610042I06Rik, MS, MST, Mst2, Mst3, Ste2, Ste20, mes, mess1	http://www.genecards.org/cgi-bin/carddisp.pl?gene=STK3
Stk32a	serine/threonine kinase 32A	A930015B13Rik, YAN, YANK1	http://www.genecards.org/cgi-bin/carddisp.pl?gene=STK32A
Stk40	serine/threonine kinase 40	2310004N11Rik, AI428792	http://www.genecards.org/cgi-bin/carddisp.pl?gene=STK40
Strip2	striatin interacting protein 2	D330017J20Rik, Fam40, Fam40b	http://www.genecards.org/cgi-bin/carddisp.pl?gene=STRIP2
Stum	mechanosensory transduction mediator	6330403A02Rik, Gm10001, R75555	http://www.genecards.org/cgi-bin/carddisp.pl?gene=STUM
Stx16	syntaxin 16	4930401D03, 5430410K23Rik, 6330500A18Rik, AI648908, AW553605, SYN, Syn16	http://www.genecards.org/cgi-bin/carddisp.pl?gene=STX16
Stx7	syntaxin 7	AI315064, AI317144, AW107239, Syn7	http://www.genecards.org/cgi-bin/carddisp.pl?gene=STX7
Stxbp1	syntaxin binding protein 1	AI317162, AI326233, MMS10-G, Ms10g, Munc-1, Munc-18a, Munc18-, Munc18-1, N-se, N-sec1, Rb-se, Rb-sec1, Sxtb, Sxtbp1, Unc18, Unc18-1, Unc18h, nse, nsec1	http://www.genecards.org/cgi-bin/carddisp.pl?gene=STXBP1
Stxbp5l	syntaxin binding protein 5-like	9430094L02, A830015P08Rik, LL, LLGL4, T2dm1, t2md1, tomos, tomosyn-2	http://www.genecards.org/cgi-bin/carddisp.pl?gene=STXBP5L
Stxbp6	syntaxin binding protein 6 (amisyn)	BC024598, C85317	http://www.genecards.org/cgi-bin/carddisp.pl?gene=STXBP6
Sv2c	synaptic vesicle glycoprotein 2c	4930527L09Rik, AI841971	http://www.genecards.org/cgi-bin/carddisp.pl?gene=SV2C
Svep1	sushi, von Willebrand factor type A, EGF and pentraxin domain containing 1	1110021D17Rik, 4833413O10Rik, AA387071, D430029O09Rik, Pol, Polydom	http://www.genecards.org/cgi-bin/carddisp.pl?gene=SVEP1
Syncrip	synaptotagmin binding, cytoplasmic RNA interacting protein	2610109K23Rik, 4632417O19Rik, GRY-, GRY-RBP, N, Nsap1, Nsap1l, hnRNP Q, pp, pp68	http://www.genecards.org/cgi-bin/carddisp.pl?gene=SYNCRIP
Syne1	spectrin repeat containing, nuclear envelope 1	8B, A330049M09Rik, BE692247, C130039F11Rik, CPG2, KASH1, Myne1, SYNE, enapt, mKIAA1756, myne-1, nes	http://www.genecards.org/cgi-bin/carddisp.pl?gene=SYNE1
Synj1	synaptojanin 1	A930006D20Rik, AA675315, mKIAA0910	http://www.genecards.org/cgi-bin/carddisp.pl?gene=SYNJ1
Sytl5	synaptotagmin-like 5	slp5	http://www.genecards.org/cgi-bin/carddisp.pl?gene=SYTL5
Tab1	TGF-beta activated kinase 1/MAP3K7 binding protein 1	2310012M03Rik, Map3k, Map3k7ip1, b2b449C, b2b449Clo	http://www.genecards.org/cgi-bin/carddisp.pl?gene=TAB1
Tab2	TGF-beta activated kinase 1/MAP3K7 binding protein 2	1110030N06Rik, A530078N03Rik, Map3k, Map3k7ip2, mKIAA0733	http://www.genecards.org/cgi-bin/carddisp.pl?gene=TAB2
Taok1	TAO kinase 1	2810468K05Rik, AU020252, D130018F14Rik, Map3k16, Markk, Psk2	http://www.genecards.org/cgi-bin/carddisp.pl?gene=TAOK1
Tax1bp1	Tax1 (human T cell leukemia virus type I) binding protein 1	1200003J11Rik, 1700069J21Rik, AA930106, D6Ertd404, D6Ertd404e, D6Ertd772, D6Ertd772e, T6B, T6bp, TXBP15, TXBP151	http://www.genecards.org/cgi-bin/carddisp.pl?gene=TAX1BP1
Tax1bp3	Tax1 (human T cell leukemia virus type I) binding protein 3	1300011C24Rik, TIP, TIP-1	http://www.genecards.org/cgi-bin/carddisp.pl?gene=TAX1BP3
Tbc1d15	TBC1 domain family, member 15	4432405K22Rik, AU022358, AU023730, AW557774, Ly6, Ly6dl, Rab7-GAP	http://www.genecards.org/cgi-bin/carddisp.pl?gene=TBC1D15
Tbk1	TANK-binding kinase 1	1200008B05Rik, AI462036, AW048562	http://www.genecards.org/cgi-bin/carddisp.pl?gene=TBK1
Tbl1xr1	transducin (beta)-like 1X-linked receptor 1	8030499H02Rik, A630076E03Rik, AW539987, C21, C230089I12Rik, DC42, I, Ira1, TBL, TBLR1	http://www.genecards.org/cgi-bin/carddisp.pl?gene=TBL1XR1
Tecta	tectorin alpha	Tct, Tctna	http://www.genecards.org/cgi-bin/carddisp.pl?gene=TECTA
Tenm3	teneurin transmembrane protein 3	2610100B16Rik, Odz, Odz1, Odz3, Ten-m, Ten-m3, mKIAA1455	http://www.genecards.org/cgi-bin/carddisp.pl?gene=TENM3
Tesk2	testis-specific kinase 2		http://www.genecards.org/cgi-bin/carddisp.pl?gene=TESK2
Tet3	tet methylcytosine dioxygenase 3	B430006D22Rik, BC037432, D230004J03Rik	http://www.genecards.org/cgi-bin/carddisp.pl?gene=TET3
Tex2	testis expressed gene 2	4930568E07Rik, AI553404, Def-5, Taz, Taz4	http://www.genecards.org/cgi-bin/carddisp.pl?gene=TEX2
Tgfbr2	transforming growth factor, beta receptor II	1110020H15Rik, AU042018, DNIIR, RIIDN, TBR, TBR-II, Tbet, Tbeta, TbetaR-II, TbetaRII	http://www.genecards.org/cgi-bin/carddisp.pl?gene=TGFBR2
Tgm1	transglutaminase 1, K polypeptide	2310004J08Rik, TGas, Tgase1	http://www.genecards.org/cgi-bin/carddisp.pl?gene=TGM1
Tgoln2	trans-golgi network protein 2	TGN38, TGN38B, TGN4, TGN41, TGN46, Ttgn, Ttgn2	http://www.genecards.org/cgi-bin/carddisp.pl?gene=TGOLN2
Thap2	THAP domain containing, apoptosis associated protein 2	2900040O07Rik, 9030625G08Rik, AI450385, AI649097	http://www.genecards.org/cgi-bin/carddisp.pl?gene=THAP2
Thbs1	thrombospondin 1	TS, TSP, TSP-1, TSP1, Thbs-, Thbs-1, tbs, tbsp1	http://www.genecards.org/cgi-bin/carddisp.pl?gene=THBS1
Tial1	Tia1 cytotoxic granule-associated RNA binding protein-like 1	5330433G13Rik, AL033329, T, TIAR, mT, mTIAR	http://www.genecards.org/cgi-bin/carddisp.pl?gene=TIAL1
Tiam2	T cell lymphoma invasion and metastasis 2	3000002F19Rik, STE, STEF, mKIAA2016	http://www.genecards.org/cgi-bin/carddisp.pl?gene=TIAM2
Timm50	translocase of inner mitochondrial membrane 50	2810403L02Rik, AU015082, TIM5, TIM50L	http://www.genecards.org/cgi-bin/carddisp.pl?gene=TIMM50
Tjp1	tight junction protein 1	ZO, ZO-, ZO1	http://www.genecards.org/cgi-bin/carddisp.pl?gene=TJP1
Tlcd4	TLC domain containing 4	4930577M16Rik, AU018104, AW109744, C730036B01Rik, Tmem56	http://www.genecards.org/cgi-bin/carddisp.pl?gene=TLCD4
Tll1	tolloid-like	Tll, Tll-1, b2b2476C, b2b2476Clo	http://www.genecards.org/cgi-bin/carddisp.pl?gene=TLL1
Tm9sf1	transmembrane 9 superfamily member 1	1200014D02Rik, AI893436, MP7, MP70	http://www.genecards.org/cgi-bin/carddisp.pl?gene=TM9SF1
Tm9sf3	transmembrane 9 superfamily member 3	1810073M23Rik, 2810031D16Rik, AI115521, AI413748, AW146116, AW549777, Sm, Smbp, mKIAA4036	http://www.genecards.org/cgi-bin/carddisp.pl?gene=TM9SF3
Tmc7	transmembrane channel-like gene family 7	1700030H01Rik, C230064B05, C630024K23Rik	http://www.genecards.org/cgi-bin/carddisp.pl?gene=TMC7
Tmco3	transmembrane and coiled-coil domains 3	B230339H12Rik, C87304	http://www.genecards.org/cgi-bin/carddisp.pl?gene=TMCO3
Tmem127	transmembrane protein 127	2310003P10Rik, AI314202, AI317350	http://www.genecards.org/cgi-bin/carddisp.pl?gene=TMEM127
Tmem165	transmembrane protein 165	AV026557, T, Tp, Tpardl, Tparl, pFT2, pFT27	http://www.genecards.org/cgi-bin/carddisp.pl?gene=TMEM165
Tmem184b	transmembrane protein 184b	2610507A11, 4732495E13Rik	http://www.genecards.org/cgi-bin/carddisp.pl?gene=TMEM184B
Tmem241	transmembrane protein 241	6030446N20Rik	http://www.genecards.org/cgi-bin/carddisp.pl?gene=TMEM241
Tmem248	transmembrane protein 248	0610007L01Rik, A930023A16Rik, AW557951, G430067H08Rik	http://www.genecards.org/cgi-bin/carddisp.pl?gene=TMEM248
Tmem45b	transmembrane protein 45b	BC018222	http://www.genecards.org/cgi-bin/carddisp.pl?gene=TMEM45B
Tmem67	transmembrane protein 67	5330408M12Rik, B230117O07, b2b1163.1Clo, b2b1291.1Clo	http://www.genecards.org/cgi-bin/carddisp.pl?gene=TMEM67
Tnc	tenascin C	AI528729, C130033P17Rik, Hxb, T, TN, TN-, TN-C, Ten, cytota, cytotactin, tenas, tenascin-C	http://www.genecards.org/cgi-bin/carddisp.pl?gene=TNC
Tnn	tenascin N	TN-W, Tn, Tnw, tenas, tenascin-W	http://www.genecards.org/cgi-bin/carddisp.pl?gene=TNN
Tnr	tenascin R	J1-ten, J1-tenascin, TN, TN-R, ja, janusin, rest, restrictin	http://www.genecards.org/cgi-bin/carddisp.pl?gene=TNR
Tns3	tensin 3	BC023928, F830010I22Rik, TEM6, Ten, Tens1	http://www.genecards.org/cgi-bin/carddisp.pl?gene=TNS3
Top3b	topoisomerase (DNA) III beta		http://www.genecards.org/cgi-bin/carddisp.pl?gene=TOP3B
Tpcn2	two pore segment channel 2	D830047E22Rik, Gm35086	http://www.genecards.org/cgi-bin/carddisp.pl?gene=TPCN2
Tppp2	tubulin polymerization-promoting protein family member 2	Gm1790, Gm77	http://www.genecards.org/cgi-bin/carddisp.pl?gene=TPPP2
Tppp3	tubulin polymerization-promoting protein family member 3	2700055K07Rik, CGI-38, Ceacam9, mmCGM8	http://www.genecards.org/cgi-bin/carddisp.pl?gene=TPPP3
Tpsb2	tryptase beta 2	AV011504, MMCP-, MMCP-6, Mcp, Mcp-, Mcp-6, Mcp6, Mcpt, Mcpt6	http://www.genecards.org/cgi-bin/carddisp.pl?gene=TPSB2
Tpst2	protein-tyrosine sulfotransferase 2	AI448750, D5Ucl, D5Ucla3, Tango, Tango13b, gr, grm, grt	http://www.genecards.org/cgi-bin/carddisp.pl?gene=TPST2
Trabd	TraB domain containing	5730502D15Rik, AL023039	http://www.genecards.org/cgi-bin/carddisp.pl?gene=TRABD
Traf7	TNF receptor-associated factor 7	RFWD, RFWD1	http://www.genecards.org/cgi-bin/carddisp.pl?gene=TRAF7
Trappc4	trafficking protein particle complex 4	1500017G03Rik, AI303617, HSPC1, HSPC172, PTD00, PTD009, Sb, Sbd, Sbdn, Sdcbp2, TRS, TRS23	http://www.genecards.org/cgi-bin/carddisp.pl?gene=TRAPPC4
Treh	trehalase (brush-border membrane glycoprotein)	2210412M19Rik	http://www.genecards.org/cgi-bin/carddisp.pl?gene=TREH
Trim2	tripartite motif-containing 2	mKIAA0517, n, narf	http://www.genecards.org/cgi-bin/carddisp.pl?gene=TRIM2
Trim71	tripartite motif-containing 71	2610206G21Rik, AL022943, Gm1127, Li, Lin41, lin, lin-41, mLi, mLin41, mlin, mlin-41	http://www.genecards.org/cgi-bin/carddisp.pl?gene=TRIM71
Trio	triple functional domain (PTPRF interacting)	6720464I07Rik, AA408740, Solo	http://www.genecards.org/cgi-bin/carddisp.pl?gene=TRIO
Trmu	tRNA 5-methylaminomethyl-2-thiouridylate methyltransferase	1110005N20Rik, 1600025P05Rik, AI314320, Trmt, Trmt1	http://www.genecards.org/cgi-bin/carddisp.pl?gene=TRMU
Trp53i11	transformation related protein 53 inducible protein 11	Tp53i, Tp53i11	http://www.genecards.org/cgi-bin/carddisp.pl?gene=TP53I11
Trpa1	transient receptor potential cation channel, subfamily A, member 1	ANKT, Anktm1, TRPA1b	http://www.genecards.org/cgi-bin/carddisp.pl?gene=TRPA1
Trpc4ap	transient receptor potential cation channel, subfamily C, member 4 associated protein	4833429F06Rik, D2Ertd113, D2Ertd113e, Tr, Trrp4ap, mFLJ00177, truss	http://www.genecards.org/cgi-bin/carddisp.pl?gene=TRPC4AP
Trpm2	transient receptor potential cation channel, subfamily M, member 2	9830168K16Rik, C79133, LTR, LTRPC2, TRP, TRPC7, Tr, Trp7, Trrp7	http://www.genecards.org/cgi-bin/carddisp.pl?gene=TRPM2
Tsg101	tumor susceptibility gene 101	AI255943, CC2	http://www.genecards.org/cgi-bin/carddisp.pl?gene=TSG101
Tspan11	tetraspanin 11	1110014F12Rik, AU067806	http://www.genecards.org/cgi-bin/carddisp.pl?gene=TSPAN11
Tspan15	tetraspanin 15	1110036D12Rik, 2700063A19Rik, AW048364, Tm4sf1, Tm4sf15	http://www.genecards.org/cgi-bin/carddisp.pl?gene=TSPAN15
Tspan33	tetraspanin 33	1300010A20Rik, P, Pen, Penu	http://www.genecards.org/cgi-bin/carddisp.pl?gene=TSPAN33
Tspan5	tetraspanin 5	2810455A09Rik, 4930505M03Rik, NET-, NET-4, Tm4sf, Tm4sf9	http://www.genecards.org/cgi-bin/carddisp.pl?gene=TSPAN5
Ttc1	tetratricopeptide repeat domain 1	4833412C19Rik, C79328, TP, TPR1	http://www.genecards.org/cgi-bin/carddisp.pl?gene=TTC1
Ttc21b	tetratricopeptide repeat domain 21B	2410066K11Rik, Thm1, aln, mKIAA1992	http://www.genecards.org/cgi-bin/carddisp.pl?gene=TTC21B
Ttc26	tetratricopeptide repeat domain 26	9330141E21Rik, 9430097H08Rik, Ift56, h, hop, hp, hpy	http://www.genecards.org/cgi-bin/carddisp.pl?gene=TTC26
Ttn	titin	1100001C23Rik, 2310036G12Rik, 2310057K23Rik, 2310074I15Rik, AF006999, AV006427, D330041I19Rik, D830007G01Rik, L5, L56, conn, mdm, sh, shru	http://www.genecards.org/cgi-bin/carddisp.pl?gene=TTN
Ttpal	tocopherol (alpha) transfer protein-like	3110080A02Rik, 5830472M02Rik	http://www.genecards.org/cgi-bin/carddisp.pl?gene=TTPAL
Ttyh3	tweety family member 3	2900029G13Rik, AI414930, TTY3, mTTY3	http://www.genecards.org/cgi-bin/carddisp.pl?gene=TTYH3
Tvp23b	trans-golgi network vesicle protein 23B	1810036I24Rik, Fam18, Fam18b, Fam18b1	http://www.genecards.org/cgi-bin/carddisp.pl?gene=TVP23B
Tyro3	TYRO3 protein tyrosine kinase 3	AI323366, Br, Brt, Dtk, Etk-2, R, Rse, Sk, Sky, TK19-2, Ti, Tif, etk2/tyro3, tk19-1	http://www.genecards.org/cgi-bin/carddisp.pl?gene=TYRO3
U2surp	U2 snRNP-associated SURP domain containing	2610101N10Rik, AU023006, Sr140	http://www.genecards.org/cgi-bin/carddisp.pl?gene=U2SURP
Uba5	ubiquitin-like modifier activating enzyme 5	5730525G14Rik, AW240750, Ube1dc1	http://www.genecards.org/cgi-bin/carddisp.pl?gene=UBA5
Ube2d1	ubiquitin-conjugating enzyme E2D 1	UBCH5	http://www.genecards.org/cgi-bin/carddisp.pl?gene=UBE2D1
Ube2d2b	ubiquitin-conjugating enzyme E2D 2B	1700013N18Rik	http://www.genecards.org/cgi-bin/carddisp.pl?gene=UBE2D4
Ube2j1	ubiquitin-conjugating enzyme E2J 1	0710008M05Rik, 1110030I22Rik, NCUBE-1, Ncub, Ncube, Ncube1, Ubc6, Ubc6p	http://www.genecards.org/cgi-bin/carddisp.pl?gene=UBE2J1
Ube2r2	ubiquitin-conjugating enzyme E2R 2	1200003M11Rik, Cdc34b, Ubc3b	http://www.genecards.org/cgi-bin/carddisp.pl?gene=UBE2R2
Ube3c	ubiquitin protein ligase E3C	AI853514, mKIAA0010	http://www.genecards.org/cgi-bin/carddisp.pl?gene=UBE3C
Ucp2	uncoupling protein 2 (mitochondrial, proton carrier)	Slc25a8, UCP 2, UCPH	http://www.genecards.org/cgi-bin/carddisp.pl?gene=UCP2
Uhrf1bp1l	UHRF1 (ICBP90) binding protein 1-like	2010319N22Rik, 4930506D01Rik, AA589495, C80672, E030041M21Rik, mKIAA0701	http://www.genecards.org/cgi-bin/carddisp.pl?gene=UHRF1BP1L
Ulk2	unc-51 like kinase 2	A830085I22Rik, AU015340, Unc51., Unc51.2, mKIAA0623	http://www.genecards.org/cgi-bin/carddisp.pl?gene=ULK2
Unc119b	unc-119 lipid binding chaperone B	AA407659, AI414892	http://www.genecards.org/cgi-bin/carddisp.pl?gene=UNC119B
Unc93a	unc-93 homolog A	Unc9, Unc93l, unc-93A	http://www.genecards.org/cgi-bin/carddisp.pl?gene=UNC93A
Ung	uracil DNA glycosylase	UNG1, UNG2	http://www.genecards.org/cgi-bin/carddisp.pl?gene=UNG
Ush1g	USH1 protein network component sans	Sans, j, js	http://www.genecards.org/cgi-bin/carddisp.pl?gene=USH1G
Usp15	ubiquitin specific peptidase 15	4921514G19Rik, AI327321, E430033I05Rik, Gcap, Gcap18	http://www.genecards.org/cgi-bin/carddisp.pl?gene=USP15
Usp30	ubiquitin specific peptidase 30	6330590F17Rik, AI851327, D5Ertd483, D5Ertd483e	http://www.genecards.org/cgi-bin/carddisp.pl?gene=USP30
Usp40	ubiquitin specific peptidase 40	B230215L03Rik, C730029K03	http://www.genecards.org/cgi-bin/carddisp.pl?gene=USP40
Usp46	ubiquitin specific peptidase 46	1190009E20Rik, 2410018I08Rik, AI451644	http://www.genecards.org/cgi-bin/carddisp.pl?gene=USP46
Usp47	ubiquitin specific peptidase 47	4930502N04Rik, A630020C16Rik	http://www.genecards.org/cgi-bin/carddisp.pl?gene=USP47
Usp9x	ubiquitin specific peptidase 9, X chromosome	5730589N07Rik, AA407302, AA407699, AL022658, AL022749, Dffr, Dffrx, FAF-X, Fa, Fafl	http://www.genecards.org/cgi-bin/carddisp.pl?gene=USP9X
Ust	uronyl-2-sulfotransferase	D930010O20Rik, UA2, UA2OST	http://www.genecards.org/cgi-bin/carddisp.pl?gene=UST
Uvrag	UV radiation resistance associated gene	9530039D02Rik, AI648770, BB124205, Uv, Uvrag1, Uvragl	http://www.genecards.org/cgi-bin/carddisp.pl?gene=UVRAG
Uxs1	UDP-glucuronate decarboxylase 1	1600025I13Rik, AI451869, AI649125, AW550562	http://www.genecards.org/cgi-bin/carddisp.pl?gene=UXS1
Vamp7	vesicle-associated membrane protein 7	Syb, Sybl1, TI-VAMP, VAM, VAMP-7	http://www.genecards.org/cgi-bin/carddisp.pl?gene=VAMP7
Vdr	vitamin D (1,25-dihydroxyvitamin D3) receptor	Nr, Nr1i1	http://www.genecards.org/cgi-bin/carddisp.pl?gene=VDR
Vegfc	vascular endothelial growth factor C	AW228853, VEGF-, VEGF-C	http://www.genecards.org/cgi-bin/carddisp.pl?gene=VEGFC
Vgll4	vestigial like family member 4	BC048841, VGL, VGL-4	http://www.genecards.org/cgi-bin/carddisp.pl?gene=VGLL4
Vps4a	vacuolar protein sorting 4A	4930589C15Rik, AI325971, AW553189	http://www.genecards.org/cgi-bin/carddisp.pl?gene=VPS4A
Vti1a	vesicle transport through interaction with t-SNAREs 1A	1110014F16Rik, 1110018K19Rik, 4921537J05Rik, MVti1, MVti1a, Vti1, Vti1-rp2	http://www.genecards.org/cgi-bin/carddisp.pl?gene=VTI1A
Vwf	Von Willebrand factor	6820430P06Rik, AI551257, B130011O06Rik, C630030D09, F8VWF, VWD	http://www.genecards.org/cgi-bin/carddisp.pl?gene=VWF
Wasf1	WASP family, member 1	AI195380, AI838537, S, Scar, WA, WAVE, WAVE-1	http://www.genecards.org/cgi-bin/carddisp.pl?gene=WASF1
Wasf3	WASP family, member 3	Scar3, Wav, Wave3	http://www.genecards.org/cgi-bin/carddisp.pl?gene=WASF3
Washc2	WASH complex subunit 2`	A130095H06, C530005J20Rik, D6Wsu116, D6Wsu116e, Fam2, Fam21	http://www.genecards.org/cgi-bin/carddisp.pl?gene=WASHC2A
Wdfy3	WD repeat and FYVE domain containing 3	2610509D04Rik, ALFY, AW319683, Al, B930017C24, BWF1, Bch, Bchs, D5Ertd66, D5Ertd66e, Ggtb3, ZFYVE25, mKIAA0993	http://www.genecards.org/cgi-bin/carddisp.pl?gene=WDFY3
Wdr19	WD repeat domain 19	C330027H04Rik, D330023L08Rik, DYF2, Ift14, Ift144, PWDMP, mKIAA1638	http://www.genecards.org/cgi-bin/carddisp.pl?gene=WDR19
Wdr37	WD repeat domain 37		http://www.genecards.org/cgi-bin/carddisp.pl?gene=WDR37
Wdr38	WD repeat domain 38	1700123D08Rik	http://www.genecards.org/cgi-bin/carddisp.pl?gene=WDR38
Wdr45	WD repeat domain 45	C79260, DXImx38, DXImx38e, JM5, Sfc1, Sfc19, WIPI-4, Wdrx, Wdrx1	http://www.genecards.org/cgi-bin/carddisp.pl?gene=WDR45
Wdr7	WD repeat domain 7	AI462727, TR, TRAG, mKIAA0541	http://www.genecards.org/cgi-bin/carddisp.pl?gene=WDR7
Whrn	whirlin	1110035G07Rik, AW122018, AW742671, C430046P22Rik, Dfnb3, Dfnb31, Ush2, Ush2d, w, wi	http://www.genecards.org/cgi-bin/carddisp.pl?gene=WHRN
Wipf2	WAS/WASL interacting protein family, member 2	1110014J05Rik, 5730509C05Rik, AA407487, Gm1176, Wich, Wire	http://www.genecards.org/cgi-bin/carddisp.pl?gene=WIPF2
Wipi2	WD repeat domain, phosphoinositide interacting 2	1110018O08Rik, 2510001I10Rik	http://www.genecards.org/cgi-bin/carddisp.pl?gene=WIPI2
Wwp1	WW domain containing E3 ubiquitin protein ligase 1	8030445B08Rik, A, AIP5, SD, SDRP1, Tiu, Tiul1	http://www.genecards.org/cgi-bin/carddisp.pl?gene=WWP1
Xiap	X-linked inhibitor of apoptosis	1110015C02Rik, A, Aipa, Api3, Bir, Birc4, I, IAP3, IL, ILP-1, MIHA	http://www.genecards.org/cgi-bin/carddisp.pl?gene=XIAP
Xrcc1	X-ray repair complementing defective repair in Chinese hamster cells 1	Xrcc-, Xrcc-1	http://www.genecards.org/cgi-bin/carddisp.pl?gene=XRCC1
Yipf4	Yip1 domain family, member 4	2310034L04Rik	http://www.genecards.org/cgi-bin/carddisp.pl?gene=YIPF4
Yy1	YY1 transcription factor	NF-E, NF-E1, YY-1	http://www.genecards.org/cgi-bin/carddisp.pl?gene=YY1
Zan	zonadhesin	Z, Zan-test	http://www.genecards.org/cgi-bin/carddisp.pl?gene=ZAN
Zbed4	zinc finger, BED type containing 4	1700009F06Rik	http://www.genecards.org/cgi-bin/carddisp.pl?gene=ZBED4
Zbtb46	zinc finger and BTB domain containing 46	2610019F01Rik, 4933406L05Rik, BZEL, Btbd4	http://www.genecards.org/cgi-bin/carddisp.pl?gene=ZBTB46
Zbtb49	zinc finger and BTB domain containing 49	4930518A03Rik, Zfp50, Zfp509, Znf509	http://www.genecards.org/cgi-bin/carddisp.pl?gene=ZBTB49
Zc3h12c	zinc finger CCCH type containing 12C	A230108E06, C230027N18Rik, mKIAA1726	http://www.genecards.org/cgi-bin/carddisp.pl?gene=ZC3H12C
Zdhhc11	zinc finger, DHHC domain containing 11	4933421L13Rik, DHHC-11, Zdhhc20	http://www.genecards.org/cgi-bin/carddisp.pl?gene=ZDHHC11
Zdhhc14	zinc finger, DHHC domain containing 14	B530001K09Rik, New1, New1cp	http://www.genecards.org/cgi-bin/carddisp.pl?gene=ZDHHC14
Zdhhc17	zinc finger, DHHC domain containing 17	A230053P19Rik, BB187739, D130071N24Rik, DHHC-17, Hip, Hip14	http://www.genecards.org/cgi-bin/carddisp.pl?gene=ZDHHC17
Zdhhc24	zinc finger, DHHC domain containing 24	5730496N17Rik, Leng4	http://www.genecards.org/cgi-bin/carddisp.pl?gene=ZDHHC24
Zdhhc5	zinc finger, DHHC domain containing 5	1110032A17Rik, AI451382, Z, Zisp	http://www.genecards.org/cgi-bin/carddisp.pl?gene=ZDHHC5
Zfhx3	zinc finger homeobox 3	A230102L03Rik, Atbf, Atbf1, S, Sci, WBP, WBP9, mKIAA4228	http://www.genecards.org/cgi-bin/carddisp.pl?gene=ZFHX3
Zfp2	zinc finger protein 2	9930007F06Rik, Fnp, Fnp-2, Zfp-, Zfp-2, mKR2, mkr-, mkr-2, mszf87	http://www.genecards.org/cgi-bin/carddisp.pl?gene=ZFP2
Zfp36l1	zinc finger protein 36, C3H type-like 1	AW742437, AW743212, Berg36, Brf, Brf1, D530020L18Rik, ERF1, TIS1, TIS11b, cMG1	http://www.genecards.org/cgi-bin/carddisp.pl?gene=ZFP36L1
Zfp37	zinc finger protein 37	Tz, Tzn, Zfp-3, Zfp-37	http://www.genecards.org/cgi-bin/carddisp.pl?gene=ZFP37
Zfyve19	zinc finger, FYVE domain containing 19	1500041L05Rik, ANCHR	http://www.genecards.org/cgi-bin/carddisp.pl?gene=ZFYVE19
Zic3	zinc finger protein of the cerebellum 3	Bn, K, Ka	http://www.genecards.org/cgi-bin/carddisp.pl?gene=ZIC3
Zkscan3	zinc finger with KRAB and SCAN domains 3	2810435N07Rik, AA408594, AI132359, Skz, Skz1, Zf47, Zfp-47, Zfp30, Zfp306, Zfp307, mszf35	http://www.genecards.org/cgi-bin/carddisp.pl?gene=ZKSCAN3
Zmym2	zinc finger, MYM-type 2	5830413P05Rik, FI, FIM, MYM, R, RAMP, S, SCLL, Zfp19, Zfp198, Znf198	http://www.genecards.org/cgi-bin/carddisp.pl?gene=ZMYM2
Zp3r	zona pellucida 3 receptor	AV264399, SP, SP56
Zswim5	zinc finger SWIM-type containing 5	4933426E21Rik, AI503093, mKIAA1511	http://www.genecards.org/cgi-bin/carddisp.pl?gene=ZSWIM5

## Sheet: Control_Enriched pathways
GeneAnalytics - Pathway results			Prepared for: Tal Gordon (talgordon@mail.tau.ac.il)
			Date: 7/22/2021
Copyright © LifeMap Sciences, Inc.
Statistics:
# Identified genes	869
# Matched genes	605
# Matched entities	220
Matching score statistics:
# High score matches	139
# Med score matches	81
# Low score matches	0
Results
Score	SuperPath Name	# SuperPath Total Genes	# SuperPath Matched Genes	Matched Genes (Symbols)	Evidence URL
37.5465	RET Signaling	971	86	CHRM3, NGEF, CRKL, CCKAR, SOS1, VEGFC, FGFR1, MAPK10, ADCY5, ADAM12, ADCY8, MAP3K7, PIK3CB, ADAM10, NFKB1, STAM, MET, AP2A2, SPTBN1, AKAP13, PRKCA, ITPR1, STAT5B, SQSTM1, DGKD, PIK3R4, MARK3, JAK2, KSR2, TRIO, SH2B2, APP, PPP2R5C, TAB2, ARHGEF9, STK11, AVPR1A, RASGRF2, DUSP8, ARRB1, PRKCD, GHSR, CASP2, ATP6V0D1, PRKAB1, GRK5, UBE2D1, PIP5K1A, TAB1, RPS6KB2, TIAM2, INPP5D, PLCB3, EGFR, CALM3, CAMK…	http://pathcards.genecards.org/card/ret_signaling
36.9295	Innate Immune System	2124	148	CASP8, LRSAM1, PTPN4, RNF34, CRKL, SOS1, WWP1, DAPP1, FGFR1, RAB5B, MAPK10, COLEC11, SIAH1, HECTD1, HECW2, DCTN3, ADCY5, ADCY8, MID1, MAP3K7, PIK3CB, TRAF7, ADAM10, NFKB1, MET, AP2A2, SPTBN1, CFB, CNN2, KLHL2, HECTD2, DDX58, PRKCA, ITGAM, ITPR1, STAT5B, SQSTM1, SMARCA4, NFKBIE, PIK3R4, MARK3, JAK2, ALOX5, KSR2, ANAPC5, OSTF1, OPRD1, AP1B1, APP, SARM1, EP300, SEC31A, KLHL20, ARF1, PTPRB, WIPF2, PP…	http://pathcards.genecards.org/card/innate_immune_system
36.2498	Signaling By GPCR	2598	171	IFT172, CASP8, PDE4D, CHRM3, NGEF, CRKL, CCKAR, SOS1, VEGFC, INTU, NOTCH4, WWP1, SCRIB, FGFR1, TJP1, ADGRE1, TBL1XR1, ADCY5, PPP1CA, ADAM12, ADCY8, TTC21B, MAP3K7, PIK3CB, ADAM10, PLA2G4A, USP15, NFKB1, STAM, MET, CSNK2A1, AP2A2, SPTBN1, LRP2, OPN1MW, RXFP3, HHAT, AKAP13, PRKCA, TIAL1, ITPR1, ARHGAP21, STAT5B, SQSTM1, DGKD, DHRS4, SMARCA4, PIK3R4, MARK3, JAK2, KSR2, TRIO, STK3, SH2B2, OPRD1, OPRK…	http://pathcards.genecards.org/card/signaling_by_gpcr
31.8947	VEGF Signaling	176	29	CASP8, SOS1, VEGFC, FGFR1, MAPK10, MAP3K7, PIK3CB, NFKB1, PRKCA, JAK2, XIAP, PRKCD, CASP2, PLCB3, EGFR, FGFR3, PAK5, CASP7, PLCH1, PTEN, SHC1, CBL, CAMKK1, GRB2, CAMK4, LIMK1, RELA, PLCG1, RHOA	http://pathcards.genecards.org/card/vegf_signaling
31.4992	Endocytosis	252	35	WWP1, RAB5B, SPG21, STAM, AP2A2, CHMP4B, RUFY1, PSD3, EHD1, ARFGEF2, ARF1, WIPF2, EPN2, ARFGAP1, KIF5B, ARRB1, PARD3, GRK5, PIP5K1A, TSG101, SMAP1, EGFR, FGFR3, NEDD4, RAB11FIP4, CBL, TGFBR2, RAB11B, CAPZB, WASHC2A, VPS4A, SH3KBP1, PDGFRA, RHOA, SNX3	http://pathcards.genecards.org/card/endocytosis
31.3774	ERK Signaling	1185	93	CASP8, SOS1, VEGFC, ITGA1, NOTCH4, FGFR1, MAPK10, PPP1R10, ADCY5, ACVR1, PPP1R13B, ADCY8, MAP3K7, ARFIP2, NFKB1, MET, LTBP4, PRKCA, ITGAM, STAT5B, NFKBIE, PIK3R4, JAK2, ANGPTL6, ITGA6, EP300, ATF7, PPP2R5C, MYO6, ATR, TAB2, ITGB1, ARHGEF9, STK11, BAX, RASGRF2, MYL2, PARD3, PRKCD, CACNA2D3, ATF6, PRKAB1, IL17RA, MAP3K9, TYRO3, PIP5K1A, TAB1, HIPK2, PLPP3, PAX6, PLCB3, EGFR, MYO5A, CAMK2D, WASF1, F…	http://pathcards.genecards.org/card/erk_signaling
30.8008	Development Endothelin-1/EDNRA Signaling	194	30	SOS1, MAPK10, ADCY5, PPP1CA, ADCY8, PIK3CB, PLA2G4A, PRKCA, ITPR1, STAT5B, ITGB1, PRKCD, RPS6KB2, PLCB3, EGFR, CALM3, CAMK2D, GNRHR, TRPA1, PTEN, PLA2G6, SHC1, CALML5, GRB2, RIPK1, HTR2B, PLCG1, RHOA, GNAS, GNAI1	http://pathcards.genecards.org/card/development_endothelin-1ednra_signaling
30.6798	Vesicle-mediated Transport	659	62	FCHO2, RAB43, RAB5B, TJP1, COLEC11, DCTN3, ANK1, COPG2, ARFIP2, PLA2G4A, STAM, SYNJ1, TGOLN2, AP2A2, SPTBN1, LRP2, CHMP4B, STX16, ANK2, VTI1A, ANKRD27, AP1B1, APP, SEC31A, EXOC8, ARF1, KIF21A, EPN2, MYO6, ARFGAP1, KIF5B, ARRB1, PICALM, PRKAB1, TRAPPC4, SBF2, TSG101, MON1A, RAB6A, EGFR, MYO5A, CALM3, HSP90AA1, TBC1D15, GOLGA4, PLA2G6, CENPE, CBL, NECAP1, GRB2, VAMP7, RAB11B, PRKAA2, LRP1, RIN2, VP…	http://pathcards.genecards.org/card/vesicle-mediated_transport
29.94	Ras Signaling Pathway	331	40	CRKL, SOS1, VEGFC, FGFR1, RAB5B, MAPK10, ADCY5, AFDN, ADCY8, PIK3CB, PLA2G4A, NFKB1, MET, PRKCA, ITGAM, KSR2, ITGB1, RASGRF2, PARD3, EFNA4, TBK1, PLCB3, EGFR, CALM3, FGFR3, PAK5, THBS1, PLA2G6, SHC1, SHOC2, CALML5, ETS1, RAPGEF4, GRB2, RELA, PLCG1, PDGFRA, RHOA, GNAS, GNAI1	http://pathcards.genecards.org/card/ras_signaling_pathway
29.5737	Toll-like Receptor Signaling Pathway	451	48	CASP8, SOS1, MAPK10, MAP3K7, PIK3CB, NFKB1, NFE2L2, DDX58, PRKCA, ITPR1, STAT5B, SQSTM1, JAK2, SELE, SARM1, EP300, TAB2, ERN1, CLDN19, BAX, MIB2, PELI1, ATF6, TAB1, TBK1, PLCB3, EGFR, CALM3, CAMK2D, HSP90AA1, CD40, NLRP3, CASP7, TGFBR2, CALML5, GRB2, PPP3CA, CISH, PPP3R1, RELA, RIPK1, PLCG1, C3, RHOA, CREB3L3, CYLD, GNAS, GNAI1	http://pathcards.genecards.org/card/toll-like_receptor_signaling_pathway
29.0637	Human Cytomegalovirus Infection	367	42	CASP8, CRKL, SOS1, MAPK10, ADCY5, ADCY8, MAP3K7, PIK3CB, NFKB1, AKAP13, PRKCA, ITPR1, JAK2, AP1B1, EP300, ATR, TAB2, BAX, TAB1, RPS6KB2, TBK1, PLCB3, SAMHD1, EGFR, CALM3, PAK5, CCR3, CALML5, GRB2, PPP3CA, LIMK1, PPP3R1, RELA, RIPK1, ATG14, PLCG1, PDGFRA, C3, RHOA, CREB3L3, GNAS, GNAI1	http://pathcards.genecards.org/card/human_cytomegalovirus_infection
28.8498	NFAT and Cardiac Hypertrophy	326	39	SOS1, ITGA1, FGFR1, MAPK10, MAP3K7, NFKB1, PRKCA, ITGAM, ITPR1, NFKBIE, PIK3R4, JAK2, ITGA6, EP300, ITGB1, PRKCD, CACNA2D3, ATF6, MAP3K9, TAB1, PLCB3, EGFR, CALM3, CAMK2D, FGFR3, CACNB2, PTEN, TGFBR2, GRB2, PPP3CA, CAMK4, PRKAR1B, PPP3R1, PLCG1, PDGFRA, RHOA, MEF2D, GNAS, GNAI1	http://pathcards.genecards.org/card/nfat_and_cardiac_hypertrophy
28.838	Development HGF Signaling Pathway	206	30	CRKL, SOS1, ITGA1, MAPK10, PIK3CB, NFKB1, MET, PRKCA, NFKBIE, SH2B2, XIAP, ITGB1, BAX, PRKCD, CALM3, CAMK2D, PTEN, SHC1, CBL, CALML5, ETS1, GRB2, CAMK4, RIN2, RELA, SH3KBP1, NUMB, PLCG1, RHOA, DEPTOR	http://pathcards.genecards.org/card/development_hgf_signaling_pathway
27.4632	Glioma	215	30	SOS1, NOTCH4, FGFR1, MAPK10, ADCY5, ADCY8, PIK3CB, MET, PRKCA, STAT5B, EP300, BAX, MED1, KIF5B, PRKCD, RPS6KB2, EGFR, CALM3, CAMK2D, PTEN, SHC1, CBL, CALML5, NOTCH2, RARB, GRB2, CAMK4, PLCG1, PDGFRA, GNAS	http://pathcards.genecards.org/card/glioma
27.2478	Relaxin Signaling Pathway	256	33	CRKL, SOS1, VEGFC, MAPK10, ADCY5, ADCY8, PIK3CB, NFKB1, RXFP3, PRKCA, ITPR1, STAT5B, JAK2, EP300, KCNJ5, SSTR2, ARRB1, PRKCD, GHSR, PLCB3, EGFR, CALM3, HSP90AA1, SHC1, TGFBR2, CALML5, GRB2, GABBR2, RELA, PLCG1, CREB3L3, GNAS, GNAI1	http://pathcards.genecards.org/card/relaxin_signaling_pathway
27.0332	Focal Adhesion	285	35	CRKL, SOS1, VEGFC, ITGA1, MAPK10, TESK2, TNR, PPP1CA, CHAD, PIK3CB, MET, PRKCA, ITGAM, PIK3R4, ITGA6, RELN, XIAP, ITGB1, MYL2, PIP5K1A, EGFR, PAK5, BIRC3, TNN, PTEN, THBS1, SHC1, CAPN7, ETS1, GRB2, VWF, TNC, PLCG1, PDGFRA, RHOA	http://pathcards.genecards.org/card/focal_adhesion
26.7891	Shigellosis	246	32	CRKL, MAPK10, WIPI2, MAP3K7, PIK3CB, NFKB1, ITPR1, SQSTM1, PIK3R4, ARF1, TAB2, ITGB1, BAX, MYL2, PRKCD, UBE2D4, UBE2D1, TAB1, RPS6KB2, TBK1, PLCB3, EGFR, WASF1, NLRP3, SEPTIN7, RELA, RIPK1, ATG14, H3C2, PLCG1, C3, RHOA	http://pathcards.genecards.org/card/shigellosis
26.1815	MET Promotes Cell Motility	115	21	CRKL, SOS1, ITGA1, STAM, MET, PRKCA, ITGA6, ITGB1, PRKCD, TRAPPC4, TNS3, NID2, THBS1, SHC1, CBL, GRB2, HPN, SH3KBP1, TNC, RHOA, GGA3	http://pathcards.genecards.org/card/met_promotes_cell_motility
26.0792	Circadian Entrainment	265	33	ACHE, CHRM3, NOS1AP, MAPK10, ADCY5, PPP1CA, ADCY8, PIK3CB, PLA2G4A, PRKCA, ITPR1, JAK2, RASD1, KCNJ5, KCNQ5, PPP2R5C, KCNJ12, KIF5B, SLC1A1, ARRB1, MTNR1A, PLCB3, SLC1A2, CALM3, CAMK2D, CALML5, PPP3CA, CAMK4, PPP3R1, SLC17A6, CREB3L3, GNAS, GNAI1	http://pathcards.genecards.org/card/circadian_entrainment
25.8015	Parathyroid Hormone Synthesis, Secretion and Action	106	20	PDE4D, FGFR1, ADCY5, ADCY8, AKAP13, PRKCA, ITPR1, VDR, ARRB1, CYP24A1, MMP25, PLCB3, EGFR, CASR, PTH1R, RHOA, MEF2D, CREB3L3, GNAS, GNAI1	http://pathcards.genecards.org/card/parathyroid_hormone_synthesis_secretion_and_action
25.2118	Apoptotic Pathways in Synovial Fibroblasts	731	62	CASP8, CRKL, SOS1, VEGFC, ITGA1, FGFR1, MAPK10, PPP1R10, ANK1, PPP1R13B, MAP3K7, ARFIP2, PLA2G4A, NFKB1, MET, LTBP4, PRKCA, ITGAM, ITPR1, NFKBIE, PIK3R4, ANGPTL6, APP, ITGA6, EP300, XIAP, PPP2R5C, ATR, ITGB1, ARHGEF9, BAX, PARD3, PRKCD, CACNA2D3, CASP2, PIP5K1A, PARP4, PLPP3, EGFR, WASF1, FGFR3, CACNB2, HSP90AA1, PAK5, CASP7, EIF3C, PTEN, PLA2G6, CBL, RARB, GRB2, PRKAR1B, LIMK1, RIPK1, PLG, H3C2,…	http://pathcards.genecards.org/card/apoptotic_pathways_in_synovial_fibroblasts
25.1614	Oxytocin Signaling Pathway	218	29	ADCY5, PPP1CA, ADCY8, PLA2G4A, PRKCA, ITPR1, KCNJ5, KCNJ12, AVPR1A, PRKCD, CACNA2D3, PRKAB1, PLCB3, EGFR, CALM3, CAMK2D, CACNB2, PLA2G6, KCNMA1, TRPM2, CALML5, PPP3CA, CAMK4, PRKAA2, PPP3R1, NPR1, RHOA, GNAS, GNAI1	http://pathcards.genecards.org/card/oxytocin_signaling_pathway
24.2089	Development Angiotensin Activation of ERK	225	29	CRKL, SOS1, ITGA1, MAPK10, ADAM12, PIK3CB, MET, PRKCA, ITPR1, JAK2, ITGB1, PRKCD, INPP5D, PLCB3, EGFR, CALM3, CAMK2D, SHC1, CIB1, CBL, CAMKK1, GRB2, CAMK4, PRKAR1B, PLCG1, PDGFRA, MEF2D, GNAS, GNAI1	http://pathcards.genecards.org/card/development_angiotensin_activation_of_erk
23.9485	Neuroscience	341	37	PCSK2, SCN8A, NOTCH4, SLC12A2, STIP1, ITGAM, ITPR1, VTI1A, RASD1, APP, ARFGAP1, BRSK2, DCBLD2, SLC1A1, PCSK1, STXBP1, SORL1, PICK1, SLC1A2, CAMK2D, DBH, DLG2, EPHB2, GAD1, NOTCH2, HTR1A, CAMK4, GABBR2, LRP1, PRKAR1B, NKX2-1, RIPK1, NUMB, TNC, SLC17A6, GGA3, NSF	http://pathcards.genecards.org/card/neuroscience
23.8036	Pathways in Cancer	531	49	CASP8, CRKL, SOS1, VEGFC, NOTCH4, FGFR1, MAPK10, ADCY5, ADCY8, PIK3CB, NFKB1, MET, NFE2L2, PRKCA, STAT5B, JAK2, ITGA6, EP300, XIAP, ITGB1, BAX, RPS6KB2, PLCB3, EGFR, GSTM5, CALM3, CAMK2D, FGFR3, HSP90AA1, BIRC3, CASP7, PTEN, CBL, KEAP1, TGFBR2, HHIP, CALML5, NOTCH2, ETS1, RARB, GRB2, GSTM1, RELA, PIM1, PLCG1, PDGFRA, RHOA, GNAS, GNAI1	http://pathcards.genecards.org/card/pathways_in_cancer
23.7661	Class I MHC Mediated Antigen Processing and Presentation	823	66	LRSAM1, RNF34, SOS1, WWP1, DAPP1, FGFR1, SIAH1, HECTD1, HECW2, DCTN3, MAP3K7, PIK3CB, TRAF7, NFKB1, MET, AP2A2, KLHL2, HECTD2, ITPR1, NFKBIE, ANAPC5, AP1B1, SEC31A, KLHL20, ARF1, PPP2R5C, TAB2, RNF123, ITGB1, KIF5B, MIB2, UBE2D4, UBE2D1, PIP5K1A, RPS6KB2, INPP5D, UBE3C, UBA5, EGFR, UBE2R2, UBE2J1, DTX3L, CALM3, FGFR3, OSBPL1A, NEDD4, CD40, PTEN, CENPE, SHC1, TRIM71, ERAP1, CBL, KEAP1, MOV10, RAPG…	http://pathcards.genecards.org/card/class_i_mhc_mediated_antigen_processing_and_presentation
23.6457	Development Dopamine D2 Receptor Transactivation of EGFR	164	24	CRKL, SOS1, PPP1CA, ADAM12, PIK3CB, PLA2G4A, ITPR1, JAK2, PPP2R5C, BAX, RPS6KB2, PLCB3, EGFR, CALM3, CAMK2D, SHC1, CBL, GRB2, PPP3CA, PRKAR1B, PPP3R1, RHOA, GNAS, GNAI1	http://pathcards.genecards.org/card/development_dopamine_d2_receptor_transactivation_of_egfr
23.4262	B Cell Receptor Signaling Pathway (KEGG)	153	23	CRKL, SOS1, DAPP1, MAP3K7, PIK3CB, NFKB1, CSNK2A1, NFKBIE, SH3BP2, PRKCD, PIP5K1A, INPP5D, CALM3, PTEN, SHC1, CBL, ETS1, GRB2, PPP3CA, PPP3R1, RELA, PLCG1, MEF2D	http://pathcards.genecards.org/card/b_cell_receptor_signaling_pathway_(kegg)
23.1965	Development EGFR Signaling Via Small GTPases	86	17	SOS1, MAPK10, PIK3CB, ARFIP2, PLA2G4A, PRKCA, ITPR1, EGFR, PTEN, SHC1, CBL, GRB2, PRKAR1B, PLCG1, PDGFRA, RHOA, GNAS	http://pathcards.genecards.org/card/development_egfr_signaling_via_small_gtpases
22.9815	Transport of Glucose and Other Sugars, Bile Salts and Organic Acids, Metal Ions and Amine Compounds	677	57	NIPA2, ABCC5, CLCN2, SLC13A5, WWP1, ABCD2, SLC12A2, ADCY5, AHCYL2, SLC13A3, SLC35B4, SLC9A8, ADCY8, SLC9A9, SLC2A13, SLC31A1, ADD1, TTYH3, SLC38A4, SLC17A5, SLC5A12, ATP13A4, ARHGEF9, ATP10A, SLC1A1, ATP6V0D1, SLC36A2, SEL1L, BEST3, SLC28A3, SLC35A2, SLC35A3, TPCN2, SLC30A7, SLC1A2, SLC44A2, SLC50A1, SLC4A10, CALM3, CAMK2D, SLC6A15, SLC5A11, SLC7A8, TRPA1, SGK3, SLC7A7, TRPC4AP, ATP6V0A1, SLC7A9,…	http://pathcards.genecards.org/card/transport_of_glucose_and_other_sugars_bile_salts_and_organic_acids_metal_ions_and_amine_compounds
22.869	ErbB Signaling Pathway	169	24	CRKL, SOS1, MAPK10, PIK3CB, NFKB1, MET, PRKCA, STAT5B, JAK2, EP300, BAX, RPS6KB2, EGFR, CAMK2D, FGFR3, PAK5, PTEN, SHC1, CBL, ETS1, GRB2, RELA, PLCG1, PDGFRA	http://pathcards.genecards.org/card/erbb_signaling_pathway
22.5689	Development EPO-induced Jak-STAT Pathway	59	14	CRKL, SOS1, NFKB1, STAT5B, JAK2, SH2B2, XIAP, CALM3, SHC1, CBL, GRB2, CISH, PIM1, PLCG1	http://pathcards.genecards.org/card/development_epo-induced_jak-stat_pathway
22.5204	Activation of CAMP-Dependent PKA	632	54	SCN8A, SOS1, VEGFC, CLCN2, FGFR1, PPP1R10, ADCY5, PPP1R13B, ADCY8, PLA2G4A, NFKB1, MET, ADD1, LTBP4, AKAP7, AKAP13, PRKCA, ITPR1, NFKBIE, PIK3R4, ANGPTL6, ANAPC5, PTPRB, MYL2, ARRB1, PRKCD, CACNA2D3, TYRO3, PLPP3, PLCB3, EGFR, CALM3, CAMK2D, FGFR3, CACNB2, PLA2G6, EPHB2, TGFBR2, RAPGEF4, GRB2, PPP3CA, CAMK4, PRKAR1B, PPP3R1, RGS8, RGS17, H3C2, PLCG1, PDGFRA, RHOA, LIPE, CRHR1, GNAS, GNAI1	http://pathcards.genecards.org/card/activation_of_camp-dependent_pka
22.3722	PAK Pathway	686	57	CASP8, PTPN4, VEGFC, NOTCH4, PTPRN, FGFR1, MAPK10, TJP1, SLC23A1, ACVR1, AFDN, PTPN23, PLA2G4A, NFKB1, MET, LTBP4, PRKCA, NFKBIE, PIK3R4, JAK2, ANGPTL6, ANAPC5, PTPRB, EPN2, MYO6, ARFGAP1, BAX, MYL2, NECTIN3, PARD3, PRKCD, CASP2, IL17RA, PLPP3, PTPN13, PLCB3, EGFR, MYO5A, WASF1, FGFR3, PAK5, CD40, CASP7, MYO1B, PTEN, PLA2G6, CCR3, KEAP1, TGFBR2, NOTCH2, PRKAR1B, LIMK1, CLIP1, PLCG1, PDGFRA, RHOA,…	http://pathcards.genecards.org/card/pak_pathway
22.2686	Phospholipase D Signaling Pathway	186	25	SOS1, MAPK10, ADCY5, ADCY8, PIK3CB, PLA2G4A, PRKCA, DGKD, ARF1, AVPR1A, PIP5K1A, RPS6KB2, PLPP3, PLCB3, EGFR, SLC44A2, WASF1, SHC1, RAPGEF4, GRB2, WASF3, PLCG1, PDGFRA, RHOA, GNAS	http://pathcards.genecards.org/card/phospholipase_d_signaling_pathway
21.9603	DAG and IP3 Signaling	257	30	PDE4D, CYP11A1, ADCY5, PPP1CA, ADCY8, PLA2G4A, AHR, AKAP7, AKAP13, PRKCA, ITPR1, VDR, PRKCD, MXD1, PLCB3, EGFR, CALM3, CAMK2D, GNRHR, CAMKK1, PPP3CA, CAMK4, PRKAR1B, PPP3R1, PLCG1, RHOA, LIPE, MEF2D, GNAS, GNAI1	http://pathcards.genecards.org/card/dag_and_ip3_signaling
21.9134	Adherens Junction	71	15	FGFR1, TJP1, AFDN, MAP3K7, MET, CSNK2A1, EP300, PTPRB, NECTIN3, PARD3, EGFR, WASF1, TGFBR2, WASF3, RHOA	http://pathcards.genecards.org/card/adherens_junction
21.8061	FMLP Pathway	317	34	CASP8, CRKL, SOS1, MAPK10, ARFIP2, PLA2G4A, NFKB1, MET, PRKCA, ITPR1, SQSTM1, NFKBIE, PIK3R4, ARHGEF9, PRKCD, PLCB3, CALM3, CAMK2D, WASF1, PAK5, CCR3, CBL, GRB2, PPP3CA, CAMK4, LIMK1, PPP3R1, RELA, RIPK1, PLCG1, RHOA, MEF2D, GNAS, GNAI1	http://pathcards.genecards.org/card/fmlp_pathway
21.6887	PI3K-Akt Signaling Pathway	525	47	CASP8, SOS1, VEGFC, ITGA1, NOTCH4, SCRIB, FGFR1, TNR, CHAD, PIK3CB, NFKB1, MET, PRKCA, JAK2, ITGA6, RELN, EP300, PPP2R5C, ATR, ITGB1, STK11, BAX, PALS1, PARD3, ATP6V0D1, EFNA4, RPS6KB2, TBK1, EGFR, FGFR3, HSP90AA1, SGK3, DLG2, TNN, PTEN, THBS1, ATP6V0A1, NOTCH2, GRB2, PRKAA2, RELA, LLGL1, VWF, TNC, PDGFRA, CREB3L3, GNAS	http://pathcards.genecards.org/card/pi3k-akt_signaling_pathway
21.6432	Transmission Across Chemical Synapses	349	36	ACHE, ABAT, KCNA3, ADCY5, ADCY8, AP2A2, KCNA1, PRKCA, KCNJ5, KCNQ5, FLOT2, EPB41L5, MYO6, KCNJ12, ARHGEF9, SLC1A1, RASGRF2, STXBP1, CACNA2D3, CACFD1, PICK1, PLCB3, SLC1A2, CALM3, CAMK2D, CACNB2, DLG2, KCNMA1, GAD1, CAMKK1, CAMK4, GABBR2, NLGN3, SLC6A13, GNAI1, NSF	http://pathcards.genecards.org/card/transmission_across_chemical_synapses
21.5028	MAPK Signaling Pathway	320	34	CASP8, CRKL, SOS1, VEGFC, FGFR1, MAPK10, MAP3K7, PLA2G4A, NFKB1, MET, PRKCA, STK3, TAOK1, TAB2, RASGRF2, DUSP8, ARRB1, PRKCD, CACNA2D3, CASP2, MAP3K20, TAB1, EFNA4, EGFR, FGFR3, CACNB2, CASP7, MKNK1, TGFBR2, GRB2, PPP3CA, PPP3R1, RELA, PDGFRA	http://pathcards.genecards.org/card/mapk_signaling_pathway
21.4046	Actin Dynamics Signaling Pathway	179	24	ITGA1, ADAM12, PIK3CB, PRKCA, ITGAM, ITGA6, ITGB1, PRKCD, EDIL3, CALM3, WASF1, HSP90AA1, EPHB2, CIB1, CALML5, GRB2, PPP3CA, CAPZB, LIMK1, PPP3R1, WASF3, FERMT2, PLCG1, RHOA	http://pathcards.genecards.org/card/actin_dynamics_signaling_pathway
21.3047	B Cell Receptor Signaling Pathway (sino)	193	25	SOS1, DAPP1, MAPK10, MAP3K7, PIK3CB, NFKB1, PRKCA, NFKBIE, PRKCD, RPS6KB2, INPP5D, CALM3, CD40, PTEN, CBL, BCL3, CALML5, CAMKK1, ETS1, GRB2, PPP3CA, CAMK4, PPP3R1, RELA, PLCG1	http://pathcards.genecards.org/card/b_cell_receptor_signaling_pathway_(sino)
20.9694	DREAM Repression and Dynorphin Expression	223	27	CASP8, ITGA1, MAPK10, ACVR1, MAP3K7, NFKB1, ITGAM, SNTB1, OPRK1, ITGA6, EP300, TAB2, ITGB1, CACNA2D3, CASP2, TAB1, PLPP3, CACFD1, EGFR, CALM3, CACNB2, BIRC3, CASP7, CAPN7, GRB2, CAMK4, PRKAR1B	http://pathcards.genecards.org/card/dream_repression_and_dynorphin_expression
20.7148	IL-2 Pathway	328	34	SOS1, DAPP1, MAPK10, MAP3K7, NFKB1, PRKCA, ITPR1, STAT5B, NFKBIE, PIK3R4, JAK2, EP300, ATF7, ATR, BAX, PRKCD, ATF6, MAP3K9, PLCB3, EGFR, CALM3, CAMK2D, PAK5, CD40, ETV4, PTEN, CBL, GRB2, PPP3CA, PRKAR1B, PPP3R1, PLCG1, RHOA, GNAS	http://pathcards.genecards.org/card/il-2_pathway
20.4855	Sertoli-Sertoli Cell Junction Dynamics	393	38	ITGA1, RAB5B, MAPK10, TJP1, AFDN, SPTBN1, ITGAM, PIK3R4, ITGA6, EXOC8, ATF7, EPN2, PPP2R5C, MYO6, ITGB1, CLDN19, MYL2, PALS1, NECTIN3, PARD3, ATF6, RAB23, MAP3K20, PLPP3, RAB6A, RAB2A, MYO5A, PAK5, MYO1B, PTEN, KEAP1, TGFBR2, RAB11B, PRKAR1B, LIMK1, LLGL1, NPR1, RHOA	http://pathcards.genecards.org/card/sertoli-sertoli_cell_junction_dynamics
20.3423	Development Ligand-independent Activation of ESR1 and ESR2	135	20	SOS1, ADCY5, PPP1CA, MAP3K7, PIK3CB, PRKCA, EP300, XIAP, MED1, CACNA2D3, EGFR, CALM3, CAMK2D, CACNB2, SHC1, GRB2, CAMK4, PRKAR1B, PDGFRA, GNAS	http://pathcards.genecards.org/card/development_ligand-independent_activation_of_esr1_and_esr2
20.269	ADP Signalling Through P2Y Purinoceptor 12	148	21	PDE4D, ADCY5, ADCY8, CSNK2A1, PRKCA, ITPR1, ARRB1, PRKCD, PLCB3, CALM3, CAMK2D, CACNB2, RAPGEF4, PPP3CA, CAMK4, PRKAR1B, RGS17, LIPE, CCT2, GNAS, GNAI1	http://pathcards.genecards.org/card/adp_signalling_through_p2y_purinoceptor_12
20.1898	Angiogenesis (CST)	89	16	VEGFC, NOTCH4, FGFR1, PROX1, ITGA6, EP300, ITGB1, FGFR3, THBS1, EPHB2, NOTCH2, ETS1, VWF, TNC, PDGFRA, EFNB2	http://pathcards.genecards.org/card/angiogenesis_(cst)
20.1212	CAMP Signaling Pathway	216	26	PDE4D, MAPK10, ADCY5, AFDN, PPP1CA, ADCY8, PIK3CB, NFKB1, EP300, SSTR2, GHSR, CALM3, CAMK2D, HHIP, CALML5, RAPGEF4, HTR1A, CAMK4, GABBR2, RELA, NPR1, RHOA, LIPE, CREB3L3, GNAS, GNAI1	http://pathcards.genecards.org/card/camp_signaling_pathway
20.0226	Autophagy - Animal	137	20	MAPK10, WIPI2, MAP3K7, PIK3CB, ITPR1, SQSTM1, UVRAG, PIK3R4, ERN1, STK11, PRKCD, RPS6KB2, TBK1, ATG13, PTEN, ULK2, RB1CC1, PRKAA2, ATG14, DEPTOR	http://pathcards.genecards.org/card/autophagy_-_animal
19.9678	Inositol Phosphate Compounds	113	18	INPP4A, PIK3CB, SYNJ1, PRKCA, ITPR1, DGKD, PIK3R4, SACM1L, PIP5K1A, INPP5D, PLCB3, CALM3, PLCH1, PTEN, CALML5, PI4K2A, PLCG1, CDS1	http://pathcards.genecards.org/card/superpathway_of_inositol_phosphate_compounds
19.6705	Apoptosis Pathway	152	21	CASP8, FGFR1, MAPK10, ACVR1, PIK3CB, NFKB1, MET, CSNK2A1, PRKCA, PIK3R4, ATR, ITGB1, BAX, PRKCD, EGFR, FGFR3, CASP7, CAPN7, TGFBR2, RELA, PDGFRA	http://pathcards.genecards.org/card/apoptosis_pathway
19.3354	TNFR1 Pathway	237	27	CASP8, SOS1, MAPK10, MAP3K7, NFKB1, CSNK2A1, SPTBN1, NFKBIE, KSR2, SELE, ATF7, XIAP, PTPRB, TAB2, BAX, CASP2, ATF6, TAB1, TBK1, HSP90AA1, BIRC3, CASP7, ERAP1, CBL, GRB2, RELA, RIPK1	http://pathcards.genecards.org/card/tnfr1_pathway
19.1568	Angiopoietin Like Protein 8 Regulatory Pathway	196	24	SOS1, MAPK10, INPP4A, MAP3K7, PIK3CB, PRKCA, PIK3R4, EHD1, SH2B2, ARF1, FLOT2, KIF5B, PRKCD, STXBP1, PRKAB1, MAP3K9, RPS6KB2, SGK3, PTEN, SHC1, CBL, GRB2, PRKAA2, LIPE	http://pathcards.genecards.org/card/angiopoietin_like_protein_8_regulatory_pathway
19.061	T Cell Receptor Signaling Pathway	183	23	CRKL, SOS1, MAPK10, MAP3K7, PIK3CB, NFKB1, CSNK2A1, ITPR1, NFKBIE, JAK2, PRKCD, RPS6KB2, EGFR, PAK5, PTEN, SHC1, CBL, GRB2, PPP3CA, PPP3R1, RELA, PLCG1, RHOA	http://pathcards.genecards.org/card/t_cell_receptor_signaling_pathway
18.5687	G-AlphaQ Signaling	215	25	SOS1, ADCY5, ADCY8, NFKB1, PRKCA, ITPR1, NFKBIE, PIK3R4, ARHGEF9, PRKCD, PLCB3, EGFR, CALM3, CAMK2D, GRB2, PPP3CA, CAMK4, PRKAR1B, PPP3R1, RGS8, RGS17, PLCG1, RHOA, GNAS, GNAI1	http://pathcards.genecards.org/card/g-alphaq_signaling
18.5473	P38 MAPK Signaling Pathway (sino)	75	14	MAP3K7, PLA2G4A, TAOK1, MAP3K9, TAB1, PAX6, SHC1, MKNK1, ETS1, GRB2, RELA, RIPK1, MEF2D, CREB3L3	http://pathcards.genecards.org/card/p38_mapk_signaling_pathway_(sino)
18.5207	GPCR Pathway	712	55	SOS1, VEGFC, ITGA1, FGFR1, MAPK10, PPP1R10, ADCY5, PPP1R13B, ADCY8, ARFIP2, NFKB1, MET, LTBP4, PRKCA, ITGAM, ITPR1, STAT5B, NFKBIE, PIK3R4, JAK2, ANGPTL6, ITGA6, EP300, ARF1, PPP2R5C, ARFGAP1, ITGB1, ARHGEF9, MED1, PRKCD, TYRO3, TSG101, PLPP3, PLCB3, EGFR, CALM3, CAMK2D, FGFR3, HSP90AA1, PAK5, EPHB2, TGFBR2, RB1CC1, RAPGEF4, GRB2, PPP3CA, CAMK4, PRKAR1B, LIMK1, PPP3R1, PLCG1, PDGFRA, RHOA, GNAS, …	http://pathcards.genecards.org/card/gpcr_pathway
18.4976	Integrin Pathway	570	47	SOS1, ITGA1, MAPK10, ADCY5, ADCY8, NFKB1, PRKCA, ITGAM, ITPR1, STAT5B, PIK3R4, JAK2, ITGA6, MYO6, ITGB1, CLDN19, MYL2, PRKCD, CACNA2D3, PIP5K1A, PLPP3, PLCB3, EGFR, MYO5A, CALM3, CAMK2D, WASF1, GNRHR, CACNB2, PAK5, MYO1B, PTEN, THBS1, CCR3, CAPN7, TGFBR2, RAPGEF4, GRB2, PRKAR1B, COL12A1, FBN2, PLG, TNC, PLCG1, RHOA, GNAS, GNAI1	http://pathcards.genecards.org/card/integrin_pathway
18.4465	VEGF Pathway (Qiagen)	122	18	SOS1, VEGFC, MAPK10, PIK3CB, PLA2G4A, PRKCA, ITPR1, PIK3R4, ITGB1, PRKCD, PLCB3, EGFR, HSP90AA1, SHC1, GRB2, PLCG1, RHOA, MEF2D	http://pathcards.genecards.org/card/vegf_pathway_(qiagen)
18.3786	CCR5 Pathway in Macrophages	322	32	CRKL, SOS1, MAPK10, ADCY5, ADCY8, PIK3CB, PLA2G4A, NFKB1, PRKCA, STAT5B, PIK3R4, JAK2, EP300, ARRB1, PARD3, PRKCD, CACNA2D3, GRK5, PLCB3, CALM3, CACNB2, HSP90AA1, PLA2G6, CCR3, SHC1, GRB2, PRKAR1B, RELA, PLCG1, RHOA, GNAS, GNAI1	http://pathcards.genecards.org/card/ccr5_pathway_in_macrophages
18.244	Regulation of Lipid Metabolism Insulin Signaling-generic Cascades	262	28	CRKL, SOS1, MAPK10, PPP1CA, MAP3K7, PIK3CB, MET, CSNK2A1, JAK2, SH2B2, FLOT2, ITGB1, PRKAB1, TAB1, RPS6KB2, EGFR, CALM3, PTEN, SHC1, MKNK1, CBL, TGFBR2, CALML5, GRB2, PRKAA2, PRKAR1B, PLG, LIPE	http://pathcards.genecards.org/card/regulation_of_lipid_metabolism_insulin_signaling-generic_cascades
18.1185	PDGFR-alpha Signaling Pathway	22	8	CRKL, SOS1, CSNK2A1, SHF, SHC1, GRB2, PLCG1, PDGFRA	http://pathcards.genecards.org/card/pdgfr-alpha_signaling_pathway
17.8355	Actin Nucleation By ARP-WASP Complex	344	33	NGEF, ITGA1, FGFR1, MAPK10, MET, ITGAM, ANAPC5, ITGA6, EXOC8, MYO6, ITGB1, ARHGEF9, MYL2, PARD3, TYRO3, PIP5K1A, PLPP3, EGFR, MYO5A, WASF1, FGFR3, PAK5, MYO1B, EPHB2, SEPTIN7, LIMK1, CLIP1, LLGL1, PDGFRA, RHOA, CDC42BPA, GNAS, GNAI1	http://pathcards.genecards.org/card/actin_nucleation_by_arp-wasp_complex
17.8169	Ca, CAMP and Lipid Signaling	126	18	MICU1, SLC12A2, PLA2G4A, PRKCA, ITPR1, ALOX5, VDR, PRKCD, PIP5K1A, PLCB3, CAMK2D, CASR, RAPGEF4, HTR1A, CAMK4, PRKAR1B, PLCG1, GNAI1	http://pathcards.genecards.org/card/ca_camp_and_lipid_signaling
17.8051	Metabolism of Proteins	1624	101	ACHE, PCSK2, MYRIP, EXOSC9, RAB43, RAB5B, SIAH1, CNTN4, ADAMTS10, NTM, C1GALT1, FKBP8, DCTN3, ANK1, COPG2, TECTA, MAP3K7, PIGN, FUT8, GALNT7, USP15, USP30, STAM, CSNK2A1, ADAMTS18, SPTBN1, TIMM50, ADD1, SLC17A5, DDX58, ANK2, EDEM1, APP, ARFGEF2, JOSD2, EP300, SEC31A, EXOC8, ARF1, B3GNT6, ARFGAP1, ERN1, RNF123, B3GNT7, MDGA1, MFGE8, DMBT1, MYSM1, KIF5B, ARRB1, PCSK1, KIFC3, USP47, ATF6, ATP6V0D1, …	http://pathcards.genecards.org/card/metabolism_of_proteins
17.7164	Longevity Regulating Pathway	102	16	ADIPOR2, ADCY5, ADCY8, PIK3CB, NFKB1, STK11, BAX, PRKAB1, RPS6KB2, ATG13, RB1CC1, CAMK4, PRKAA2, CAT, RELA, CREB3L3	http://pathcards.genecards.org/card/longevity_regulating_pathway
17.7037	PI Metabolism	79	14	INPP4A, PIK3CB, SYNJ1, RUFY1, PIK3R4, SACM1L, ARF1, PIP5K1A, PTPN13, INPP5D, GDPD5, PTEN, PI4K2A, PLEKHA8	http://pathcards.genecards.org/card/pi_metabolism
17.7037	Long-term Potentiation	79	14	PPP1CA, ADCY8, PRKCA, ITPR1, EP300, PLCB3, CALM3, CAMK2D, CALML5, PPP3CA, CAMK4, PPP3R1, GNAS, GNAI1	http://pathcards.genecards.org/card/long-term_potentiation
17.6816	PEDF Induced Signaling	745	56	CASP8, SOS1, FGFR1, MAPK10, PPP1R10, ACVR1, PPP1R13B, PLA2G4A, NFKB1, SMARCA1, MET, PRKCA, STAT5B, SMARCA4, NFKBIE, PIK3R4, JAK2, ALOX5, EP300, ECE2, IL17B, PPP2R5C, BAX, PRKCD, CACNA2D3, CASP2, IL17RA, MAP3K9, TYRO3, MED13, PLCB3, UBE3C, EGFR, CALM3, FGFR3, CACNB2, HSP90AA1, CD40, CASP7, SMARCA2, PLA2G6, CCR3, EPHB2, TGFBR2, RARB, GRB2, PPP3CA, CAMK4, PRKAA2, PPP3R1, RELA, PIM1, PDGFRA, MEF2D, G…	http://pathcards.genecards.org/card/pedf_induced_signaling
17.6636	C-type Lectin Receptor Signaling Pathway	127	18	CASP8, MAPK10, PIK3CB, NFKB1, ITPR1, NFKBIE, EP300, PRKCD, CALM3, NLRP3, BCL3, CALML5, PPP3CA, CD209, PPP3R1, RELA, RHOA, CYLD	http://pathcards.genecards.org/card/c-type_lectin_receptor_signaling_pathway
17.5361	TCR Signaling (Qiagen)	239	26	SOS1, MAPK10, ARFIP2, PLA2G4A, NFKB1, PRKCA, ITPR1, STAT5B, NFKBIE, PIK3R4, JAK2, ATF7, PRKCD, CACNA2D3, ATF6, CALM3, CAMK2D, CACNB2, PAK5, PLA2G6, GRB2, PPP3CA, PPP3R1, PLCG1, PDGFRA, RHOA	http://pathcards.genecards.org/card/tcr_signaling_(qiagen)
17.5226	Syndecan-4-mediated Signaling Events	31	9	FGFR1, ADAM12, PRKCA, ITGB1, PRKCD, THBS1, PLG, TNC, RHOA	http://pathcards.genecards.org/card/syndecan-4-mediated_signaling_events
17.3605	Common Cytokine Receptor Gamma-Chain Family Signaling Pathways	142	19	CRKL, SOS1, PIK3CB, NFKB1, PRKCA, STAT5B, NFKBIE, PIK3R4, JAK2, PRKCD, PRKAB1, PTEN, SHC1, CBL, BCL3, GRB2, PRKAA2, CISH, RELA	http://pathcards.genecards.org/card/common_cytokine_receptor_gamma-chain_family_signaling_pathways
17.0355	Development A3 Receptor Signaling	106	16	SOS1, PIK3CB, PLA2G4A, NFKB1, PRKCA, ITPR1, NFKBIE, PRKCD, PLCB3, SHC1, GRB2, PRKAR1B, RELA, PLCG1, RHOA, GNAI1	http://pathcards.genecards.org/card/development_a3_receptor_signaling
16.9118	Amphetamine Addiction	83	14	ADCY5, PPP1CA, NFKB1, PRKCA, CALM3, CAMK2D, CALML5, PPP3CA, CAMK4, PPP3R1, RELA, CREB3L3, GNAS, GNAI1	http://pathcards.genecards.org/card/amphetamine_addiction
16.5044	Kit Receptor Signaling Pathway	97	15	CRKL, SOS1, PRKCA, STAT5B, JAK2, SH2B2, ENPP3, EP300, INPP5D, PTEN, CCR3, SHC1, CBL, GRB2, PLCG1	http://pathcards.genecards.org/card/kit_receptor_signaling_pathway
16.4932	Delta508-CFTR Traffic / ER-to-Golgi in CF	135	18	COPG2, AP2A2, CHMP4B, STX16, PIK3R4, VTI1A, AP1B1, SEC31A, ARF1, MYO6, STX7, PICALM, TSG101, MYO1B, VAMP7, PRKAR1B, PLEKHA8, NSF	http://pathcards.genecards.org/card/delta508-cftr_traffic__er-to-golgi_in_cf
16.492	Immune Response Fc Epsilon RI Pathway	162	20	SOS1, MAPK10, PIK3CB, PLA2G4A, NFKB1, PRKCA, ITPR1, NFKBIE, ALOX5, PTPN13, INPP5D, CALM3, PTEN, SHC1, CBL, GRB2, PPP3CA, PPP3R1, RELA, PLCG1	http://pathcards.genecards.org/card/immune_response_fc_epsilon_ri_pathway
16.4915	Development ERBB-family Signaling	122	17	SOS1, MAPK10, PIK3CB, NFKB1, PRKCA, NFKBIE, PIK3R4, JAK2, PRKCD, EGFR, HSP90AA1, SHC1, CBL, GRB2, RELA, PLCG1, RHOA	http://pathcards.genecards.org/card/development_erbb-family_signaling
16.473	Internalization of ErbB1	34	9	SOS1, PIK3CB, SYNJ1, UBE2D1, TSG101, EGFR, CBL, GRB2, SH3KBP1	http://pathcards.genecards.org/card/internalization_of_erbb1
16.4402	Response to Elevated Platelet Cytosolic Ca2+	639	49	SOS1, VEGFC, ITGA1, PIK3CB, DOCK9, GTPBP2, PLA2G4A, CARMIL1, PRKCA, ITGAM, ITPR1, DGKD, JAK2, EHD1, SELE, SH2B2, APP, ITGA6, EP300, KIF21A, PPP2R5C, ITGB1, KIF5B, ITIH3, ARRB1, PRKCD, TTN, INPP5D, PICK1, CALM3, SLC7A8, SLC7A7, THBS1, CENPE, SHC1, SLC7A9, KCNMA1, RAPGEF4, GRB2, CAPZB, PRKAR1B, VWF, PLG, ISLR, H3C2, PLCG1, RHOA, GNAS, GNAI1	http://pathcards.genecards.org/card/response_to_elevated_platelet_cytosolic_ca2
16.3104	Metabolism	2628	146	CMPK1, ACHE, NADK2, PDE4D, CHRM3, UST, ABHD3, CYP11A1, ABAT, ABCC5, UXS1, ABHD14B, ACSS2, INPP4A, SLC23A1, C1GALT1, ADIPOR2, TBL1XR1, ADCY5, AHCYL2, ACAD10, PPP1CA, ADCY8, CSGALNACT2, TREH, PIK3CB, PIGN, LMF2, FUT7, FUT8, GALNT7, PLA2G4A, SYNJ1, AHR, CSNK2A1, AP2A2, NOSTRIN, OSBPL6, LRP2, AMPD2, RUFY1, PRKCA, OPLAH, ITPR1, DGKD, DHRS4, PIK3R4, ALOX5, PDE6D, SACM1L, RELN, ENPP3, EP300, ETHE1, FA2H…	http://pathcards.genecards.org/card/metabolism
16.2583	Immune Response IL-2 Activation and Signaling Pathway	75	13	SOS1, PIK3CB, NFKB1, STAT5B, NFKBIE, JAK2, INPP5D, SHC1, GRB2, PPP3CA, CISH, RELA, PIM1	http://pathcards.genecards.org/card/immune_response_il-2_activation_and_signaling_pathway
16.2465	Autophagy Pathway	178	21	ITGA1, MAP1LC3A, RAB5B, MAPK10, ADAM12, ITGAM, UVRAG, PIK3R4, ITGA6, ITGB1, RAB23, EDIL3, RAB6A, RAB2A, ATG13, EPHB2, CIB1, RB1CC1, RAB11B, ATG14, FERMT2	http://pathcards.genecards.org/card/autophagy_pathway
16.1235	Sweet Taste Signaling	365	33	PDE4D, MAPK10, ADCY5, ADCY8, SLC9A9, PLA2G4A, PRKCA, ITPR1, STK25, STK40, STK3, MYO6, STK11, BRSK2, MYL2, PRKCD, CACNA2D3, STK10, MTNR1A, ZAN, PLCB3, MYO5A, CALM3, CAMK2D, CACNB2, STK32A, MYO1B, PLA2G6, PRKAR1B, NPR1, PLCG1, GNAS, GNAI1	http://pathcards.genecards.org/card/sweet_taste_signaling
16.0749	TNF Signaling Pathway	112	16	CASP8, VEGFC, MAPK10, MAP3K7, PIK3CB, NFKB1, SELE, TAB2, TAB1, BIRC3, CASP7, BCL3, RELA, RIPK1, CREB3L3, DAB2IP	http://pathcards.genecards.org/card/tnf_signaling_pathway
16.0178	Phospholipase-C Pathway	503	41	SOS1, VEGFC, ITGA1, FGFR1, ADCY5, ADCY8, PLA2G4A, NFKB1, MET, LTBP4, PRKCA, ITGAM, ITPR1, PIK3R4, ANGPTL6, ITGA6, EP300, ITGB1, ARHGEF9, PRKCD, PLPP3, PLCB3, EGFR, CALM3, FGFR3, PLCH1, PTEN, PLA2G6, GRB2, PPP3CA, CAMK4, PPP3R1, COL12A1, FBN2, TNC, PLCG1, PDGFRA, RHOA, MEF2D, GNAS, GNAI1	http://pathcards.genecards.org/card/phospholipase-c_pathway
16.0125	Tuberculosis	180	21	CASP8, RAB5B, MAPK10, NFKB1, ITGAM, JAK2, EP300, VDR, BAX, ATP6V0D1, CALM3, CAMK2D, ATP6V0A1, CALML5, PPP3CA, CD209, PPP3R1, RELA, C3, RHOA, MRC1	http://pathcards.genecards.org/card/tuberculosis
15.9999	AGE-RAGE Signaling Pathway in Diabetic Complications	100	15	VEGFC, MAPK10, PIK3CB, NFKB1, PRKCA, STAT5B, JAK2, SELE, BAX, PRKCD, PLCB3, TGFBR2, RELA, PIM1, PLCG1	http://pathcards.genecards.org/card/age-rage_signaling_pathway_in_diabetic_complications
15.9193	Proton Pump Inhibitor Pathway, Pharmacodynamics	45	10	CHRM3, ADCY5, ADCY8, PRKCA, SSTR2, PLCB3, PLCH1, CASR, PLCG1, GNAS	http://pathcards.genecards.org/card/proton_pump_inhibitor_pathway_pharmacodynamics
15.8306	Signaling Events Mediated By TCPTP	36	9	SOS1, ITGA1, PIK3CB, MET, STAT5B, ATR, ITGB1, EGFR, GRB2	http://pathcards.genecards.org/card/signaling_events_mediated_by_tcptp
15.7449	Constitutive Signaling By Ligand-Responsive EGFR Cancer Variants	20	7	SOS1, EGFR, HSP90AA1, SHC1, CBL, GRB2, PLCG1	http://pathcards.genecards.org/card/constitutive_signaling_by_ligand-responsive_egfr_cancer_variants
15.5999	Dopamine-DARPP32 Feedback Onto CAMP Pathway	228	24	KCNA3, PPP1R10, ADCY5, PPP1R13B, ADCY8, KCNA1, PRKCA, ITPR1, KCNJ5, KCNQ5, PPP2R5C, KCNJ12, PRKCD, PLCB3, CALM3, CACNB2, CAMKK1, PPP3CA, CAMK4, PRKAR1B, PPP3R1, PLCG1, GNAS, GNAI1	http://pathcards.genecards.org/card/dopamine-darpp32_feedback_onto_camp_pathway
15.4922	CREB Pathway	529	42	SOS1, VEGFC, FGFR1, ADCY5, ADCY8, NFKB1, MET, LTBP4, PRKCA, ITPR1, PIK3R4, ANGPTL6, EP300, ARHGEF9, PRKCD, CACNA2D3, TYRO3, PLPP3, PLCB3, EGFR, CALM3, CAMK2D, FGFR3, CACNB2, PTEN, EPHB2, TRPM2, CAMKK1, GRB2, HTR1A, PPP3CA, CAMK4, PRKAR1B, PPP3R1, HTR2B, NPR1, PLCG1, PDGFRA, RHOA, MEF2D, GNAS, GNAI1	http://pathcards.genecards.org/card/creb_pathway
15.4884	MAPK Signaling: Oxidative Stress Pathway	79	13	MAPK10, NFE2L2, PRKCA, BAX, ARRB1, PRKCD, CAMK2D, SHC1, CAMKK1, PPP3CA, PPP3R1, USP9X, PLCG1	http://pathcards.genecards.org/card/mapk_signaling_oxidative_stress_pathway
15.2074	Glycerophospholipid Biosynthesis	232	24	ACHE, ABHD3, INPP4A, PIK3CB, PLA2G4A, SYNJ1, CSNK2A1, RUFY1, DGKD, PIK3R4, SACM1L, ARF1, PIP5K1A, PLPP3, PTPN13, INPP5D, SLC44A2, GDPD5, PTEN, PITPNM1, PLA2G6, PI4K2A, PLEKHA8, CDS1	http://pathcards.genecards.org/card/glycerophospholipid_biosynthesis
15.146	Prolactin Signaling Pathway	159	19	SOS1, MAPK10, PIK3CB, NFKB1, STAT5B, JAK2, EP300, ITGB1, BAX, PRKCD, PTEN, SHC1, CBL, GRB2, PRKAA2, CISH, RELA, PLCG1, RHOA	http://pathcards.genecards.org/card/prolactin_signaling_pathway
15.1277	Corticotropin-releasing Hormone Signaling Pathway	93	14	CYP11A1, NFKB1, PRKCA, ERN1, ARRB1, PRKCD, HSP90AA1, PRKAA2, RELA, PLCG1, RHOA, CRHR1, GNAS, GNAI1	http://pathcards.genecards.org/card/corticotropin-releasing_hormone_signaling_pathway
15.0883	Myometrial Relaxation and Contraction Pathways	218	23	PDE4D, CHRM3, ADCY5, ADCY8, NFKB1, CNN2, PRKCA, ITPR1, KCNJ5, MYL2, ARRB1, PRKCD, GRK5, PLCB3, CALM3, CAMK2D, CAMK4, PRKAR1B, RGS17, PLCG1, CRHR1, GNAS, GNAI1	http://pathcards.genecards.org/card/myometrial_relaxation_and_contraction_pathways
15.015	Downstream Signaling Events of B Cell Receptor (BCR)	234	24	SOS1, DAPP1, FGFR1, MAP3K7, PIK3CB, NFKB1, MET, ITPR1, NFKBIE, PPP2R5C, PIP5K1A, RPS6KB2, EGFR, CALM3, FGFR3, PTEN, SHC1, CBL, MOV10, GRB2, RELA, SH3KBP1, PLCG1, PDGFRA	http://pathcards.genecards.org/card/downstream_signaling_events_of_b_cell_receptor_(bcr)
15.0025	Antigen Activates B Cell Receptor (BCR) Leading to Generation of Second Messengers	59	11	SOS1, DAPP1, ITPR1, CALM3, SHC1, CBL, GRB2, PPP3CA, PPP3R1, SH3KBP1, PLCG1	http://pathcards.genecards.org/card/antigen_activates_b_cell_receptor_(bcr)_leading_to_generation_of_second_messengers
14.9441	TGF-beta Signaling Pathway (WikiPathways)	133	17	SOS1, WWP1, MAP3K7, MET, SPTBN1, APP, EP300, ITGB1, TAB1, SKI, THBS1, SHC1, TGFBR2, ETS1, GRB2, TNC, RHOA	http://pathcards.genecards.org/card/tgf-beta_signaling_pathway_(wikipathways)
14.9073	Immune Response IL-23 Signaling Pathway	161	19	SOS1, PIK3CB, NFKB1, STAT5B, NFKBIE, PIK3R4, JAK2, ITGB1, BAX, EGFR, PAK5, CASP7, SHC1, ETS1, GRB2, RELA, RIPK1, PLG, PDGFRA	http://pathcards.genecards.org/card/immune_response_il-23_signaling_pathway
14.8963	Glucagon Signaling Pathway	107	15	ITPR1, EP300, PPP4R3A, PRKAB1, PFKP, PLCB3, CALM3, CAMK2D, PPP4C, CALML5, PPP3CA, PRKAA2, PPP3R1, CREB3L3, GNAS	http://pathcards.genecards.org/card/glucagon_signaling_pathway
14.8917	Retrograde Transport at The Trans-Golgi-Network	49	10	RAB43, ARFIP2, TGOLN2, STX16, VTI1A, RAB6A, GOLGA4, COG2, COG5, NSF	http://pathcards.genecards.org/card/retrograde_transport_at_the_trans-golgi-network
14.8462	Aldosterone Synthesis and Secretion	283	27	CHRM3, CCKAR, CYP11A1, ADCY5, ADCY8, AHR, LRP2, PRKCA, ITPR1, RASD1, EP300, KCNJ5, PLCB3, EGFR, CALM3, CAMK2D, KCNMA1, CALML5, RAPGEF4, CAMK4, RIMS2, NPR1, LIPE, CRHR1, CREB3L3, GNAS, GNAI1	http://pathcards.genecards.org/card/aldosterone_synthesis_and_secretion
14.8251	Endometrial Cancer	236	24	CRKL, SOS1, FGFR1, MAPK10, PIK3CB, NFKB1, ITGAM, STAT5B, EP300, ITGB1, BAX, RPS6KB2, EGFR, HSP90AA1, PTEN, SHC1, CBL, TGFBR2, GRB2, RELA, PIM1, PDGFRA, RHOA, CREB3L3	http://pathcards.genecards.org/card/endometrial_cancer
14.7808	Tyrosine Kinases / Adaptors	148	18	CRKL, VEGFC, FGFR1, STAM, MET, JAK2, SH2B2, ARRB1, TYRO3, EGFR, FGFR3, SHC1, EPHB2, CBL, GRB2, SH3KBP1, PDGFRA, EFNB2	http://pathcards.genecards.org/card/tyrosine_kinases__adaptors
14.6547	G-Beta Gamma Signaling	351	31	SCN8A, SOS1, VEGFC, TJP1, ADCY5, ADCY8, NFKB1, PRKCA, ITPR1, NFKBIE, PIK3R4, EP300, KCNJ5, PRKCD, CACNA2D3, PLCB3, EGFR, CALM3, CACNB2, CCN3, GRB2, PPP3CA, CAMK4, PRKAR1B, HTR2B, NPR1, PLCG1, CRHR1, MEF2D, GNAS, GNAI1	http://pathcards.genecards.org/card/g-beta_gamma_signaling
14.6283	TNF Signaling	72	12	CASP8, MAP3K7, NFKB1, SQSTM1, XIAP, TAB2, TAB1, TAX1BP1, BIRC3, RELA, RIPK1, CYLD	http://pathcards.genecards.org/card/tnf_signaling
14.6283	Development_TGF-beta Receptor Signaling	72	12	SOS1, MAP3K7, NFKB1, ANAPC5, EP300, XIAP, YY1, TAB1, SKI, SHC1, TGFBR2, RELA	http://pathcards.genecards.org/card/development_tgf-beta_receptor_signaling
14.6047	A6b1 and A6b4 Integrin Signaling	31	8	MET, PRKCA, ITGA6, ITGB1, EGFR, CASP7, SHC1, GRB2	http://pathcards.genecards.org/card/a6b1_and_a6b4_integrin_signaling
14.5572	EGF/EGFR Signaling Pathway	164	19	CRKL, SOS1, STAM, SYNJ1, PRKCA, STAT5B, JAK2, PRKCD, STXBP1, INPP5D, EGFR, NEDD4, PTEN, SHC1, CBL, GRB2, SH3KBP1, PLCG1, MEF2D	http://pathcards.genecards.org/card/egfegfr_signaling_pathway
14.4823	Fc Gamma R-mediated Phagocytosis	97	14	CRKL, PIK3CB, PLA2G4A, PRKCA, PRKCD, PIP5K1A, RPS6KB2, PLPP3, INPP5D, WASF1, PLA2G6, LIMK1, WASF3, PLCG1	http://pathcards.genecards.org/card/fc_gamma_r-mediated_phagocytosis
14.4527	CGMP-PKG Signaling Pathway	240	24	ADCY5, PPP1CA, ADCY8, PRKCA, ITPR1, OPRD1, PPP2R5C, MYL2, CACNA2D3, PLCB3, CALM3, CAMK2D, CACNB2, KCNMA1, CALML5, RAPGEF4, PPP3CA, PPP3R1, NPR1, RHOA, MEF2D, CREB3L3, GNAS, GNAI1	http://pathcards.genecards.org/card/cgmp-pkg_signaling_pathway
14.4244	Yersinia Infection	137	17	CRKL, MAPK10, SKAP2, MAP3K7, PIK3CB, NFKB1, WIPF2, TAB2, ITGB1, PIP5K1A, TAB1, TBK1, NLRP3, LIMK1, RELA, PLCG1, RHOA	http://pathcards.genecards.org/card/yersinia_infection
14.4244	Clathrin-mediated Endocytosis	137	17	FCHO2, RAB5B, STAM, SYNJ1, TGOLN2, AP2A2, LRP2, EPN2, ARFGAP1, ARRB1, PICALM, EGFR, CBL, NECAP1, GRB2, VAMP7, SH3KBP1	http://pathcards.genecards.org/card/clathrin-mediated_endocytosis
14.4149	TGF-beta Receptor Signaling (Pathway Interaction Database)	51	10	SOS1, WWP1, PPP1CA, MAP3K7, SPTBN1, XIAP, SHC1, TGFBR2, GRB2, RHOA	http://pathcards.genecards.org/card/tgf-beta_receptor_signaling_(pathway_interaction_database)
14.3078	Integration of Energy Metabolism	111	15	CHRM3, ADIPOR2, ADCY5, ADCY8, PRKCA, ITPR1, STK11, STXBP1, PLCB3, CACNB2, RAPGEF4, PRKAA2, PRKAR1B, GNAS, GNAI1	http://pathcards.genecards.org/card/integration_of_energy_metabolism
14.2555	Macroautophagy	74	12	MAP1LC3A, WIPI2, CHMP4B, UVRAG, PIK3R4, PRKAB1, WDR45, ATG13, ULK2, RB1CC1, PRKAA2, ATG14	http://pathcards.genecards.org/card/macroautophagy
14.2252	Salmonella Infection (KEGG)	340	30	CASP8, RAB5B, MAPK10, TJP1, DCTN3, MAP3K7, PIK3CB, NFKB1, ARF1, WIPF2, MYO6, TAB2, ITGB1, CLDN19, BAX, KIF5B, MYL2, TAB1, MYO5A, WASF1, HSP90AA1, BIRC3, NLRP3, CASP7, PLEKHM1, MYO1B, RELA, WASF3, RIPK1, RHOA	http://pathcards.genecards.org/card/salmonella_infection_(kegg)
14.1754	Axon Guidance	182	20	NGEF, SEMA6A, PIK3CB, MET, PRKCA, ITGB1, PARD3, EFNA4, CAMK2D, PAK5, EPHB2, PPP3CA, SRGAP1, LIMK1, PPP3R1, PLCG1, RHOA, PLXNB2, EFNB2, GNAI1	http://pathcards.genecards.org/card/axon_guidance
14.1724	Fluid Shear Stress and Atherosclerosis	139	17	MAPK10, ACVR1, MAP3K7, PIK3CB, NFKB1, NFE2L2, SQSTM1, SELE, GSTM5, CALM3, HSP90AA1, KEAP1, CALML5, GSTM1, PRKAA2, RELA, RHOA	http://pathcards.genecards.org/card/fluid_shear_stress_and_atherosclerosis
14.1652	G-protein Signaling Ras Family GTPases in Kinase Cascades (scheme)	112	15	SOS1, ITGA1, MAPK10, NFKB1, PRKCA, STAT5B, JAK2, ITGB1, PRKCD, PLCB3, EGFR, CASP7, SHC1, GRB2, RELA	http://pathcards.genecards.org/card/g-protein_signaling_ras_family_gtpases_in_kinase_cascades_(scheme)
13.9255	Toxoplasmosis	141	17	CASP8, MAPK10, MAP3K7, NFKB1, ITGAM, JAK2, ALOX5, ITGA6, XIAP, TAB2, ITGB1, TAB1, BIRC3, CD40, RELA, C3, GNAI1	http://pathcards.genecards.org/card/toxoplasmosis
13.9246	Gap Junction	88	13	SOS1, TJP1, ADCY5, ADCY8, PRKCA, ITPR1, PLCB3, EGFR, GRB2, HTR2B, PDGFRA, GNAS, GNAI1	http://pathcards.genecards.org/card/gap_junction
13.8954	Pertussis	76	12	MAPK10, NFKB1, ITGAM, ITGB1, CALM3, NLRP3, CASP7, CALML5, RELA, C3, RHOA, GNAI1	http://pathcards.genecards.org/card/pertussis
13.7687	LPA Receptor Mediated Events	65	11	ADCY5, ADCY8, PIK3CB, NFKB1, PRKCD, PLCB3, EGFR, RELA, PLCG1, RHOA, GNAI1	http://pathcards.genecards.org/card/lpa_receptor_mediated_events
13.7408	PDGFR-beta Signaling Pathway	54	10	SOS1, STAT5B, SH2B2, PRKCD, PTEN, SHC1, CBL, GRB2, LRP1, PLCG1	http://pathcards.genecards.org/card/pdgfr-beta_signaling_pathway
13.6013	Blood-Brain Barrier and Immune Cell Transmigration: VCAM-1/CD106 Signaling Pathways	158	18	TJP1, AFDN, PPP1CA, PIK3CB, PRKCA, ITGAM, ITGB1, CLDN19, MYL2, PRKCD, PRKAB1, PLCB3, CAMKK1, RAPGEF4, PRKAA2, PLCG1, RHOA, GNAI1	http://pathcards.genecards.org/card/blood-brain_barrier_and_immune_cell_transmigration_vcam-1cd106_signaling_pathways
13.5769	AGE/RAGE Pathway	66	11	CASP8, PLA2G4A, NFKB1, PRKCA, STAT5B, JAK2, PRKCD, EGFR, SHC1, RELA, RHOA	http://pathcards.genecards.org/card/agerage_pathway
13.4385	ICos-ICosL Pathway in T-Helper Cell	131	16	MAPK10, NFKB1, PRKCA, ITPR1, NFKBIE, EP300, PRKCD, CALM3, CAMK2D, CD40, PTEN, GRB2, PPP3CA, PPP3R1, PLCG1, MEF2D	http://pathcards.genecards.org/card/icos-icosl_pathway_in_t-helper_cell
13.3887	Signaling Events Mediated By VEGFR1 and VEGFR2	67	11	SOS1, VEGFC, PRKCA, CALM3, HSP90AA1, NEDD4, SHC1, CBL, GRB2, PLCG1, RHOA	http://pathcards.genecards.org/card/signaling_events_mediated_by_vegfr1_and_vegfr2
13.3812	Nanomaterial Induced Apoptosis	45	9	CASP8, MAPK10, NFKB1, XIAP, BAX, CASP2, BIRC3, CASP7, RIPK1	http://pathcards.genecards.org/card/nanomaterial_induced_apoptosis
13.3812	Alzheimers Disease Pathway	45	9	FGFR1, ADAM10, PRKCA, APP, PRKCD, EGFR, FGFR3, LRP1, PDGFRA	http://pathcards.genecards.org/card/alzheimers_disease_pathway
13.2914	RANK Signaling in Osteoclasts	105	14	MAPK10, MAP3K7, NFKB1, SQSTM1, NFKBIE, PIK3R4, XIAP, TAB2, TAB1, BIRC3, CBL, PPP3CA, RELA, PLCG1	http://pathcards.genecards.org/card/rank_signaling_in_osteoclasts
13.2914	Aquaporin-mediated Transport	105	14	ADCY5, ADCY8, SPTBN1, ADD1, AKAP13, ITPR1, ITGB1, PLCB3, CALM3, RAPGEF4, PRKAR1B, LIMK1, RHOA, GNAS	http://pathcards.genecards.org/card/aquaporin-mediated_transport
13.2135	Development VEGF Signaling Via VEGFR2 - Generic Cascades	147	17	SOS1, PIK3CB, PLA2G4A, NFKB1, PRKCA, ITPR1, NFKBIE, JAK2, SELE, PRKCD, HSP90AA1, SHC1, GRB2, PPP3CA, RELA, PLCG1, RHOA	http://pathcards.genecards.org/card/development_vegf_signaling_via_vegfr2_-_generic_cascades
13.1162	Cytokine Signaling in Immune System	760	52	CRKL, SOS1, FGFR1, MID1, MAP3K7, PIK3CB, NFKB1, MET, SPTBN1, DDX58, ITGAM, STAT5B, SQSTM1, SMARCA4, MARK3, JAK2, ALOX5, KSR2, OPRD1, PPP2R5C, TAB2, ITGB1, RASGRF2, DUSP8, ARRB1, PRKCD, PELI1, IL17RA, TAB1, INPP5D, SAMHD1, EGFR, CALM3, CAMK2D, FGFR3, HSP90AA1, NEDD4, BIRC3, CD40, SHC1, CBL, TRIM2, GRB2, CISH, RELA, PIM1, VWF, RHOU, H3C2, PLCG1, PDGFRA, DAB2IP	http://pathcards.genecards.org/card/cytokine_signaling_in_immune_system
13.111	Signaling By ERBB4	57	10	SOS1, WWP1, PIK3CB, STAT5B, JAK2, TAB2, EGFR, NEDD4, SHC1, GRB2	http://pathcards.genecards.org/card/signaling_by_erbb4
13.0704	Development IGF-1 Receptor Signaling	134	16	SOS1, PIK3CB, NFKB1, MET, STAT5B, NFKBIE, JAK2, EP300, BAX, INPP5D, HSP90AA1, PTEN, SHC1, CBL, GRB2, RELA	http://pathcards.genecards.org/card/development_igf-1_receptor_signaling
13.0483	Calcium Signaling Pathway	240	23	CHRM3, CCKAR, VEGFC, FGFR1, ADCY8, MET, PRKCA, ITPR1, AVPR1A, TPCN2, PLCB3, EGFR, CALM3, CAMK2D, FGFR3, CALML5, PPP3CA, CAMK4, PPP3R1, HTR2B, PLCG1, PDGFRA, GNAS	http://pathcards.genecards.org/card/calcium_signaling_pathway
13.0227	Renin Secretion	69	11	ADCY5, ITPR1, PLCB3, CALM3, KCNMA1, CALML5, PPP3CA, PPP3R1, NPR1, GNAS, GNAI1	http://pathcards.genecards.org/card/renin_secretion
12.9275	Organelle Biogenesis and Maintenance	341	29	IFT172, TMEM67, DCTN3, TBL1XR1, TTC26, C2CD3, TTC21B, RP2, PDE6D, EXOC8, ARL6, HELZ2, UNC119B, RPGRIP1L, B9D1, MED1, PRKAB1, HSP90AA1, WDR19, PKD2, PRKAA2, CLUAP1, CEP78, GFM1, IFT22, CCT2, MEF2D, CEP41, BBS5	http://pathcards.genecards.org/card/organelle_biogenesis_and_maintenance
12.8363	Golgi-to-ER Retrograde Transport	180	19	RAB43, DCTN3, COPG2, ARFIP2, PLA2G4A, TGOLN2, STX16, VTI1A, ARF1, KIF21A, ARFGAP1, KIF5B, RAB6A, GOLGA4, PLA2G6, CENPE, COG2, COG5, NSF	http://pathcards.genecards.org/card/golgi-to-er_retrograde_transport
12.7363	NOD-like Receptor Signaling Pathway	181	19	CASP8, MAPK10, MAP3K7, NFKB1, ITPR1, XIAP, TAB2, PRKCD, TAB1, TBK1, PLCB3, HSP90AA1, BIRC3, NLRP3, CASR, TRPM2, RELA, RIPK1, RHOA	http://pathcards.genecards.org/card/nod-like_receptor_signaling_pathway
12.7363	RhoGDI Pathway	181	19	VEGFC, FGFR1, MAPK10, MET, PRKCA, PIK3R4, MYO6, ARHGEF9, MYL2, PIP5K1A, PLPP3, PLCB3, EGFR, MYO5A, FGFR3, PAK5, MYO1B, PLCG1, RHOA	http://pathcards.genecards.org/card/rhogdi_pathway
12.6922	Nucleotide-binding Domain, Leucine Rich Repeat Containing Receptor (NLR) Signaling Pathways	48	9	CASP8, MAP3K7, APP, TAB2, CASP2, TAB1, BIRC3, NLRP3, CYLD	http://pathcards.genecards.org/card/nucleotide-binding_domain_leucine_rich_repeat_containing_receptor_(nlr)_signaling_pathways
12.6332	MTOR Signaling Pathway (KEGG)	213	21	SOS1, FGFR1, PIK3CB, MET, PRKCA, FNIP2, LGR5, STK11, PRKAB1, RPS6KB2, EGFR, FGFR3, PTEN, ULK2, GRB2, PRKAA2, CLIP1, RIPK1, PDGFRA, RHOA, DEPTOR	http://pathcards.genecards.org/card/mtor_signaling_pathway_(kegg)
12.5421	Activated TLR4 Signalling	153	17	CASP8, PTPN4, MAPK10, MAP3K7, NFKB1, ITGAM, PIK3R4, APP, SARM1, TAB2, PELI1, UBE2D1, TAB1, TBK1, BIRC3, RELA, RIPK1	http://pathcards.genecards.org/card/activated_tlr4_signalling
12.4564	Ubiquitin-Proteasome Dependent Proteolysis	125	15	WWP1, HECW2, TRAF7, USP15, USP30, USP47, UBE2D4, UBE2D1, UBE3C, UBA5, UBE2R2, UBE2J1, USP46, USP40, USP9X	http://pathcards.genecards.org/card/ubiquitin-proteasome_dependent_proteolysis
12.4295	NNOS Signaling at Neuronal Synapses	29	7	NOS1AP, PRKCA, RASD1, PRKCD, CALM3, PPP3CA, PPP3R1	http://pathcards.genecards.org/card/nnos_signaling_at_neuronal_synapses
12.4142	Phagocytosis of Microbes	85	12	ITGA1, PRKCA, ITGAM, PIK3R4, ITGA6, ITGB1, PRKCD, PLCB3, PLCG1, C3, RHOA, MRC1	http://pathcards.genecards.org/card/phagocytosis_of_microbes
12.1481	Diseases Associated With The TLR Signaling Cascade	62	10	MAP3K7, NFKB1, SQSTM1, TAB2, PELI1, TAB1, INPP5D, TBK1, RELA, RIPK1	http://pathcards.genecards.org/card/diseases_associated_with_the_tlr_signaling_cascade
12.1387	Deubiquitination	301	26	FKBP8, MAP3K7, USP15, USP30, STAM, DDX58, JOSD2, EP300, RNF123, MYSM1, ARRB1, USP47, YY1, UBE2D1, TAB1, MUL1, BIRC3, NLRP3, PTEN, KEAP1, TGFBR2, USP9X, RIPK1, RHOA, SNX3, CYLD	http://pathcards.genecards.org/card/deubiquitination
12.1129	Development A2A Receptor Signaling	87	12	SOS1, MAPK10, PIK3CB, NFKB1, ITPR1, NFKBIE, PLCB3, SHC1, GRB2, PRKAR1B, RELA, GNAS	http://pathcards.genecards.org/card/development_a2a_receptor_signaling
12.0538	Role of Calcineurin-dependent NFAT Signaling in Lymphocytes	51	9	FKBP8, CSNK2A1, PRKCA, EP300, PRKCD, CALM3, CAMK4, PIM1, MEF2D	http://pathcards.genecards.org/card/role_of_calcineurin-dependent_nfat_signaling_in_lymphocytes
12.0538	Signaling By ERBB2	51	9	SOS1, PRKCA, PRKCD, EGFR, HSP90AA1, SHC1, GRB2, PLCG1, RHOA	http://pathcards.genecards.org/card/signaling_by_erbb2
11.9236	Brain-Derived Neurotrophic Factor (BDNF) Signaling Pathway	144	16	MAPK10, KCNA3, NFKB1, CSNK2A1, STAT5B, SQSTM1, JAK2, SH2B2, PRKCD, SHC1, GRB2, CAMK4, PRKAA2, RELA, PLCG1, NSF	http://pathcards.genecards.org/card/brain-derived_neurotrophic_factor_(bdnf)_signaling_pathway
11.9082	Oocyte Meiosis	159	17	MAPK10, ADCY5, PPP1CA, ADCY8, PIK3CB, ITPR1, CPEB2, ANAPC5, PPP2R5C, STK10, CALM3, CAMK2D, HSP90AA1, CALML5, PPP3CA, PPP3R1, GNAI1	http://pathcards.genecards.org/card/oocyte_meiosis
11.8722	P70S6K Signaling	392	31	SOS1, VEGFC, FGFR1, MAPK10, PPP1R10, PPP1R13B, NFKB1, MET, LTBP4, PRKCA, ITPR1, PIK3R4, JAK2, ANGPTL6, PPP2R5C, STK11, PRKCD, PLPP3, EGFR, FGFR3, PAK5, EIF3C, EPHB2, GRB2, PRKAA2, PRKAR1B, PLCG1, PDGFRA, RHOA, GNAS, GNAI1	http://pathcards.genecards.org/card/p70s6k_signaling
11.8693	Class I PI3K Signaling Events	41	8	SOS1, DAPP1, PIK3CB, ARF1, HSP90AA1, PTEN, PLCG1, RHOA	http://pathcards.genecards.org/card/class_i_pi3k_signaling_events
11.8687	Toll Comparative Pathway	102	13	MAPK10, MAP3K7, NFKB1, NFKBIE, JAK2, EP300, ATF7, TAB2, ATF6, TAB1, CALM3, RELA, GNAS	http://pathcards.genecards.org/card/toll_comparative_pathway
11.8512	Development_Leptin Signaling Via PI3K-dependent Pathway	52	9	PIK3CB, NFKB1, NFKBIE, JAK2, STK11, PRKAB1, PRKAA2, PRKAR1B, RELA	http://pathcards.genecards.org/card/development_leptin_signaling_via_pi3k-dependent_pathway
11.8418	IL-2 Signaling Pathway	76	11	CRKL, SOS1, STAM, STAT5B, JAK2, RPS6KB2, SHC1, CBL, GRB2, CISH, RHOA	http://pathcards.genecards.org/card/il-2_signaling_pathway
11.8153	EPH-Ephrin Signaling	145	16	NGEF, MAP3K7, PIK3CB, ADAM10, SYNJ1, AP2A2, ITGB1, EFNA4, PTPN13, HSP90AA1, EPHB2, GRB2, LIMK1, RHOA, EFNB2, GNAI1	http://pathcards.genecards.org/card/eph-ephrin_signaling
11.6428	Cytoskeletal Signaling	308	26	SCRIB, TJP1, AFDN, ADD1, MARK3, STK3, SEC31A, PLEC, FLOT2, MYO6, ITGB1, RAB6A, PAK5, RAPGEF4, RAB11B, PPP3CA, LIMK1, CLIP1, USP9X, LLGL1, WASF3, SH3KBP1, ATL1, FERMT2, RHOA, NSF	http://pathcards.genecards.org/card/cytoskeletal_signaling
11.6236	Gastric Cancer	241	22	SOS1, NOTCH4, FGFR1, PIK3CB, MET, NFE2L2, PRKCA, SMARCA4, BAX, RPS6KB2, EGFR, GSTM5, SMARCA2, PTEN, SHC1, KEAP1, TGFBR2, NOTCH2, RARB, GRB2, GSTM1, PLCG1	http://pathcards.genecards.org/card/gastric_cancer
11.6062	NF-kappa B Signaling Pathway	104	13	MAP3K7, NFKB1, CSNK2A1, DDX58, XIAP, TAB2, TAB1, BIRC3, CD40, RELA, RIPK1, PLCG1, CYLD	http://pathcards.genecards.org/card/nf-kappa_b_signaling_pathway
11.579	Developmental Biology	1078	66	NGEF, SCN8A, SOS1, ITGA1, ZIC3, FGFR1, SIAH1, ANK1, TBL1XR1, SEMA6A, PIK3CB, ADAM10, NFKB1, MET, CSNK2A1, AP2A2, SPTBN1, ST14, PRKCA, ANK2, MARK3, JAK2, KSR2, TRIO, EP300, KMT2C, HELZ2, PPP2R5C, ITGB1, MED1, MED31, RASGRF2, DUSP8, ARRB1, YY1, EFNA4, MED13, PAX6, MED12, EGFR, CALM3, CAMK2D, FGFR3, CACNB2, HSP90AA1, PAK5, KAZN, SHC1, EPHB2, RARB, GRB2, SRGAP1, LIMK1, CLASP2, CNOT9, RELA, VWF, TGM1,…	http://pathcards.genecards.org/card/developmental_biology
11.5442	NF-KappaB Family Pathway	242	22	VEGFC, FGFR1, MAP3K7, NFKB1, MET, CSNK2A1, LTBP4, PRKCA, NFKBIE, PIK3R4, ANGPTL6, EP300, PRKCD, PLPP3, EGFR, CALM3, FGFR3, CD40, BCL3, PRKAR1B, RELA, RIPK1	http://pathcards.genecards.org/card/nf-kappab_family_pathway
11.505	Notch Signaling Pathway (WikiPathways)	163	17	NOTCH4, ADAM12, PIK3CB, ADAM10, NFKB1, CSNK2A1, JAK2, EP300, KCNJ5, EPN2, PICALM, YY1, DTX3L, CCN3, CBL, NOTCH2, NUMB	http://pathcards.genecards.org/card/notch_signaling_pathway_(wikipathways)
11.5047	MicroRNAs in Cancer	310	26	CRKL, SOS1, NOTCH4, TNR, PIK3CB, NFKB1, MET, ST14, PRKCA, EP300, EFNA4, CYP24A1, EGFR, FGFR3, TNN, PTEN, THBS1, SHC1, TRIM71, NOTCH2, GRB2, PIM1, TNC, PLCG1, PDGFRA, RHOA	http://pathcards.genecards.org/card/micrornas_in_cancer
11.4459	G Protein Coupled Receptors Signaling	66	10	SOS1, PIK3CB, PRKCA, MARK3, RASGRF2, ARRB1, PRKCD, PLCB3, CAMKK1, CAMK4	http://pathcards.genecards.org/card/g_protein_coupled_receptors_signaling
11.4131	Development FGFR Signaling Pathway	134	15	CRKL, SOS1, FGFR1, MAPK10, PIK3CB, PRKCA, ITPR1, PIK3R4, PRKCD, INPP5D, FGFR3, SHC1, CBL, GRB2, PLCG1	http://pathcards.genecards.org/card/development_fgfr_signaling_pathway
11.3887	Akt Signaling	682	46	SOS1, VEGFC, ITGA1, FGFR1, MAPK10, ACVR1, MAP3K7, NFKB1, MET, LTBP4, PRKCA, ITGAM, STAT5B, PIK3R4, JAK2, ANGPTL6, ITGA6, XIAP, PPP2R5C, TAB2, ITGB1, BAX, PRKCD, IL17RA, TYRO3, TAB1, PLPP3, PFKP, PLCB3, EGFR, FGFR3, HSP90AA1, PAK5, CD40, PTEN, CCR3, EPHB2, MKNK1, GRB2, RIPK1, PLCG1, PDGFRA, RHOA, MEF2D, GNAS, GNAI1	http://pathcards.genecards.org/card/akt_signaling
11.354	Salivary Secretion	180	18	CHRM3, CCKAR, SLC12A2, ADCY5, ADCY8, PRKCA, ITPR1, SSTR2, DMBT1, TPCN2, PLCB3, CALM3, CAMK2D, KCNMA1, CALML5, RHOA, GNAS, GNAI1	http://pathcards.genecards.org/card/salivary_secretion
11.2789	EPHA Forward Signaling	67	10	NGEF, CRKL, ADAM10, EFNA4, HSP90AA1, PAK5, CBL, LIMK1, PLCG1, RHOA	http://pathcards.genecards.org/card/epha_forward_signaling
11.2617	Ceramide Pathway	93	12	CASP8, MAPK10, NFKB1, PIK3R4, ATF7, PPP2R5C, BAX, PRKCD, CASP2, ATF6, CASP7, RIPK1	http://pathcards.genecards.org/card/ceramide_pathway
11.2142	Degradation of The Extracellular Matrix	297	25	TLL1, ITGA1, TNR, ADAM10, MATN1, ADAMTS18, LTBP4, PRKCA, ITGAM, ITGA6, MATN4, PLEC, MFAP4, ITGB1, BCAN, TRAPPC4, MMP25, NID2, TNN, THBS1, CAPN7, COL12A1, FBN2, PLG, TNC	http://pathcards.genecards.org/card/degradation_of_the_extracellular_matrix
11.115	Mitophagy - Animal	68	10	MAPK10, USP15, USP30, CSNK2A1, SQSTM1, NBR1, TAX1BP1, TBK1, TBC1D15, RELA	http://pathcards.genecards.org/card/mitophagy_-_animal
11.0875	Apelin Signaling Pathway	137	15	ADCY5, ADCY8, ITPR1, PIK3R4, MYL2, PRKAB1, RPS6KB2, PLCB3, CALM3, CALML5, CAMK4, PRKAA2, LIPE, MEF2D, GNAI1	http://pathcards.genecards.org/card/apelin_signaling_pathway
11.0161	Regulation of KIT Signaling	16	5	SOS1, PRKCA, SH2B2, CBL, GRB2	http://pathcards.genecards.org/card/regulation_of_kit_signaling
10.9964	NLR Proteins	9	4	MAP3K7, CD40, EPHB2, RELA	http://pathcards.genecards.org/card/nlr_proteins
10.9944	Regulation of Actin Dynamics For Phagocytic Cup Formation	95	12	PIK3CB, ITPR1, WIPF2, PRKCD, MYO5A, WASF1, HSP90AA1, PLA2G6, GRB2, LIMK1, WASF3, PLCG1	http://pathcards.genecards.org/card/regulation_of_actin_dynamics_for_phagocytic_cup_formation
10.9543	Neurophysiological Process Glutamate Regulation of Dopamine D1A Receptor Signaling	69	10	PDE4D, ADCY5, PPP1CA, ITPR1, PPP2R5C, CALM3, PPP3CA, PRKAR1B, PPP3R1, GNAS	http://pathcards.genecards.org/card/neurophysiological_process_glutamate_regulation_of_dopamine_d1a_receptor_signaling
10.8874	Integrated Breast Cancer Pathway	154	16	CASP8, USP15, NFKB1, AHR, SMARCA4, EP300, ATR, STK11, BAX, PPP4R3A, TAB1, HIPK2, EGFR, PTEN, FILIP1, TGFBR2	http://pathcards.genecards.org/card/integrated_breast_cancer_pathway
10.8849	Pathways of Neurodegeneration - Multiple Diseases	635	43	CASP8, CHRM3, NXF1, MAPK10, DCTN3, WIPI2, PIK3CB, ADAM10, NFKB1, CSNK2A1, AP2A2, PRKCA, ITPR1, SQSTM1, PIK3R4, APP, EP300, ERN1, BAX, KIF5B, ATF6, ATXN2L, TBK1, PLCB3, SLC1A2, UBE2J1, CALM3, CAMK2D, DNAH1, CASP7, ATG13, ULK2, RB1CC1, CALML5, DNAH5, PPP3CA, LRP1, CAT, PPP3R1, RELA, ATG14, PLCG1, CREB3L3	http://pathcards.genecards.org/card/pathways_of_neurodegeneration_-_multiple_diseases
10.8762	Signaling By Hedgehog	139	15	IFT172, INTU, ADCY5, ADCY8, TTC21B, HHAT, RPGRIP1L, ARRB1, SEL1L, WDR19, HHIP, PRKAR1B, IQCE, NUMB, GNAS	http://pathcards.genecards.org/card/signaling_by_hedgehog
10.8656	EGF Receptor (ErbB1) Signaling Pathway	25	6	SOS1, PIK3CB, EGFR, GRB2, PLCG1, GNAI1	http://pathcards.genecards.org/card/egf_receptor_(erbb1)_signaling_pathway
10.8588	RIG-I/MDA5 Mediated Induction of IFN-alpha/beta Pathways	110	13	CASP8, MAPK10, MAP3K7, NFKB1, DDX58, APP, EP300, UBE2D1, TAX1BP1, TBK1, RELA, RIPK1, CYLD	http://pathcards.genecards.org/card/rig-imda5_mediated_induction_of_ifn-alphabeta_pathways
10.7722	Ubiquitin Mediated Proteolysis	140	15	WWP1, SIAH1, MID1, ANAPC5, RHOBTB1, XIAP, UBE2D4, UBE2D1, UBE3C, UBE2R2, UBE2J1, NEDD4, BIRC3, CBL, KEAP1	http://pathcards.genecards.org/card/ubiquitin_mediated_proteolysis
10.7301	VEGF Pathway (Tocris)	58	9	CASP8, FGFR1, MAPK10, PIK3CB, PRKCA, PIK3R4, BAX, PRKCD, CASP7	http://pathcards.genecards.org/card/vegf_pathway_(tocris)
10.6922	Cellular Senescence (KEGG)	156	16	PPP1CA, PIK3CB, NFKB1, ITPR1, SQSTM1, ATR, HIPK2, CALM3, ZFP36L1, PTEN, TGFBR2, CALML5, ETS1, PPP3CA, PPP3R1, RELA	http://pathcards.genecards.org/card/cellular_senescence_(kegg)
10.625	EGFR Transactivation By Gastrin	17	5	SOS1, PRKCA, EGFR, SHC1, GRB2	http://pathcards.genecards.org/card/egfr_transactivation_by_gastrin
10.6223	G-protein Signaling G-Protein Alpha-i Signaling Cascades	112	13	SOS1, ADCY5, ADCY8, ADD1, ITPR1, ANAPC5, SHC1, RAPGEF4, GRB2, PRKAR1B, PLCG1, GNAS, GNAI1	http://pathcards.genecards.org/card/g-protein_signaling_g-protein_alpha-i_signaling_cascades
10.5866	FGF Signaling Pathway	47	8	SOS1, FGFR1, MET, STAT5B, SHC1, CBL, GRB2, PLCG1	http://pathcards.genecards.org/card/fgf_signaling_pathway
10.5866	Inositol Phosphate Metabolism	47	8	INPP4A, SYNJ1, INPP5D, PLCB3, CALM3, PLCH1, PTEN, PLCG1	http://pathcards.genecards.org/card/inositol_phosphate_metabolism
10.5129	Respiratory Electron Transport, ATP Synthesis By Chemiosmotic Coupling, and Heat Production By Uncoupling Proteins.	471	34	CASP8, SOS1, FGFR1, MAPK10, ADIPOR2, ADCY5, PPP1CA, ADCY8, PIK3CB, NFKB1, PRKCA, SMARCA4, ERN1, BAX, PRKCD, ATP6V0D1, PRKAB1, RPS6KB2, PLCB3, CAMK2D, CASP7, SMARCA2, PTEN, UCP2, ATP6V0A1, TGFBR2, GRB2, PRKAA2, RELA, NPR1, LIPE, CREB3L3, COX15, GNAS	http://pathcards.genecards.org/card/respiratory_electron_transport_atp_synthesis_by_chemiosmotic_coupling_and_heat_production_by_uncoupling_proteins
10.4897	Immune Response IFN Gamma Signaling Pathway	72	10	CRKL, PIK3CB, PRKCA, ITPR1, JAK2, EP300, PRKCD, CALM3, CAMK2D, CBL	http://pathcards.genecards.org/card/immune_response_ifn_gamma_signaling_pathway
10.4667	PI3K/AKT Activation	143	15	SOS1, FGFR1, PIK3CB, MET, PPP2R5C, PIP5K1A, RPS6KB2, EGFR, FGFR3, PTEN, SHC1, MOV10, GRB2, PDGFRA, RHOA	http://pathcards.genecards.org/card/pi3kakt_activation
10.4667	Spinocerebellar Ataxia	143	15	MAPK10, WIPI2, PIK3CB, CIC, PRKCA, ITPR1, PIK3R4, RELN, ERN1, ATXN2L, PLCB3, ATG13, ULK2, RB1CC1, ATG14	http://pathcards.genecards.org/card/spinocerebellar_ataxia
10.4649	Osteoclast Differentiation	128	14	MAPK10, MAP3K7, PIK3CB, NFKB1, SQSTM1, TAB2, TAB1, TGFBR2, GRB2, PPP3CA, CAMK4, PPP3R1, RELA, CYLD	http://pathcards.genecards.org/card/osteoclast_differentiation
10.4063	Necroptosis	159	16	CASP8, MAPK10, PLA2G4A, CHMP4B, STAT5B, SQSTM1, JAK2, XIAP, BAX, CAMK2D, HSP90AA1, BIRC3, NLRP3, VPS4A, RIPK1, CYLD	http://pathcards.genecards.org/card/necroptosis
10.391	NF-kappaB Signaling	327	26	DAPP1, MAP3K7, USP15, NFKB1, DDX58, STAT5B, NFKBIE, JAK2, ALOX5, SARM1, ENPP3, TAB2, PELI1, TAB1, INPP5D, TAX1BP1, TBK1, FLI1, CBL, PPP3CA, CISH, RELA, PIM1, RIPK1, SH3KBP1, CYLD	http://pathcards.genecards.org/card/nf-kappab_signaling
10.2786	DNA Damage Response (only ATM Dependent)	115	13	SOS1, MAPK10, MAP3K7, PIK3CB, NFKB1, PIK3R4, PPP2R5C, BAX, PTEN, SHC1, GRB2, CAT, RHOA	http://pathcards.genecards.org/card/dna_damage_response_(only_atm_dependent)
10.2683	NRF2 Pathway	145	15	ABCC5, SLC2A13, NFE2L2, SQSTM1, SLC5A12, GSTM5, SLC6A15, HSP90AA1, SLC5A11, KEAP1, TGFBR2, GSTM1, SLC39A13, SLC6A13, SLC2A5	http://pathcards.genecards.org/card/nrf2_pathway
10.2589	Arf1 Pathway	18	5	ARFIP2, ARF1, ARFGAP1, PIP5K1A, GGA3	http://pathcards.genecards.org/card/arf1_pathway
10.2578	Activated PKN1 Stimulates Transcription of AR (androgen Receptor) Regulated Genes KLK2 and KLK3	669	44	SOS1, SIAH1, TBL1XR1, ADCY5, PPP1CA, MAP3K7, PIK3CB, NFKB1, PRKCA, ITGAM, SMARCA4, JAK2, APP, EP300, KMT2C, SET, MFGE8, YY1, SORL1, PAX6, PLCB3, CALM3, CD40, SMARCA2, TET3, SHC1, CALML5, CAMKK1, RARB, GRB2, CAMK4, CNOT9, RELA, USP9X, VWF, H3C2, PLCG1, C3, RHOA, JMJD6, GGA3, CREB3L3, GNAS, GNAI1	http://pathcards.genecards.org/card/activated_pkn1_stimulates_transcription_of_ar_(androgen_receptor)_regulated_genes_klk2_and_klk3
10.2536	Insulin Receptor Recycling	130	14	MAPK10, TJP1, SLC12A2, ADAM10, NFKB1, MET, PRKCA, ARF1, ATP6V0D1, EGFR, ATP6V0A1, RELA, PLCG1, GNAS	http://pathcards.genecards.org/card/insulin_receptor_recycling
10.2488	Signal Transduction_PKA Signaling	87	11	PDE4D, ADCY5, ADCY8, AKAP7, AKAP13, ANAPC5, PPP2R5C, WASF1, PRKAR1B, GNAS, GNAI1	http://pathcards.genecards.org/card/signal_transduction_pka_signaling
10.2087	Nanog in Mammalian ESC Pluripotency	534	37	CASP8, SOS1, VEGFC, FGFR1, MAPK10, ADCY5, ADCY8, MET, CSNK2A1, NOSTRIN, LTBP4, PRKCA, ITPR1, PIK3R4, ANGPTL6, PPP2R5C, PRKCD, PRKAB1, TYRO3, RPS6KB2, PLPP3, PLCB3, EGFR, CALM3, FGFR3, HSP90AA1, EPHB2, CBL, GRB2, PRKAA2, PRKAR1B, CDH23, NPR1, PLCG1, PDGFRA, GNAS, GNAI1	http://pathcards.genecards.org/card/nanog_in_mammalian_esc_pluripotency
10.2033	Cell Adhesion_Plasmin Signaling	49	8	FGFR1, MAP3K7, PIK3CB, XIAP, TAB1, SERPINI1, TGFBR2, PLG	http://pathcards.genecards.org/card/cell_adhesion_plasmin_signaling
10.194	Translation Translation Regulation By Alpha-1 Adrenergic Receptors	74	10	SOS1, PIK3CB, PRKCA, ITPR1, PRKCD, RPS6KB2, CALM3, CAMK2D, SHC1, RHOA	http://pathcards.genecards.org/card/translation_translation_regulation_by_alpha-1_adrenergic_receptors
10.1669	IL-17 Family Signaling Pathways	116	13	CASP8, MAPK10, MAP3K7, NFKB1, NFKBIE, JAK2, ANAPC5, IL17B, TAB2, IL17RA, TBK1, HSP90AA1, RELA	http://pathcards.genecards.org/card/il-17_family_signaling_pathways
10.1439	Measles	331	26	CASP8, NXF1, MAPK10, MAP3K7, PIK3CB, NFKB1, CSNK2A1, DDX58, PRKCA, STAT5B, NFKBIE, JAK2, TPSB2, EP300, TAB2, BAX, TAB1, TBK1, NEDD4, CD40, NLRP3, RAB11B, CD209, RELA, RIPK1, PLG	http://pathcards.genecards.org/card/measles
10.1166	L1CAM Interactions	102	12	SCN8A, ITGA1, FGFR1, ANK1, CSNK2A1, AP2A2, SPTBN1, ANK2, ITGB1, EGFR, EPHB2, NUMB	http://pathcards.genecards.org/card/l1cam_interactions
10.1019	TGF-Beta Pathway	653	43	CRKL, SOS1, VEGFC, ITGA1, FGFR1, MAPK10, MAP3K7, NFKB1, STAM, MET, LTBP4, ITGAM, STAT5B, NFKBIE, PIK3R4, JAK2, ANGPTL6, ITGA6, EP300, XIAP, PPP2R5C, ITGB1, ARHGEF9, BAX, MAP3K9, TYRO3, TAB1, SKI, PLPP3, DUSP14, EGFR, FGFR3, PAK5, EPHB2, MKNK1, TGFBR2, GRB2, CISH, RIPK1, H3C2, PDGFRA, RHOA, GNAS	http://pathcards.genecards.org/card/tgf-beta_pathway
